# Supplementary material for: Metabolic dyshomeostasis induced by SARS-CoV-2 structural proteins reveals immunological insights into viral olfactory interactions
Source: bioRxiv preprint, doi:10.1101/2022.02.01.478724, version 1 (2022-02-02)
Supplement: Supplemental Table 1 [file 478724_file12.xlsx]

## Sheet: E-DOWN
Ensembl.Gene.ID	GFP1	GFP2	GFP3	E1	E2	E3	norm.GFP1	norm.GFP2	norm.GFP3	norm.E1	norm.E2	norm.E3	baseMean	GFP	E	FoldChange	log2FoldChange	stat	pvalue	padj	dispGeneEst	dispFit	dispMAP	dispersion	betaConv	maxCooks	Gene.description	Chromosome.scaffold.name	Gene.start..bp.	Gene.end..bp.	Strand	Gene.name	EntrezID
ENSMUSG00000000037	65	64	94	37	27	30	70	63	94	35	25	31	53.19	76	30	401	-1319	-4849	1.24255e+08	9.24663e+07	0.0216	0.0326	0.0306	0.0306	TRUE	0.4202	Scm polycomb group protein like 2 [Source:MGI Symbol;Acc:MGI:1340042]	X	161082525	161258213	1	Scml2	107815
ENSMUSG00000000126	34	54	42	20	23	12	37	53	42	19	22	12	30.85	44	18	402	-1316	-3769	0.000164154007926251	0.000848481461986262	0	0.0552	0.0489	0.0489	TRUE	0.3369	wingless-type MMTV integration site family, member 9A [Source:MGI Symbol;Acc:MGI:2446084]	11	59306928	59333552	1	Wnt9a	216795
ENSMUSG00000000290	82	104	115	15	26	19	89	102	115	14	24	19	60.8	102	19	0.19	-2399	-8611	0.000723858	0.0164983	0	0.0287	0.0259	0.0259	TRUE	0.2087	integrin beta 2 [Source:MGI Symbol;Acc:MGI:96611]	10	77530252	77565708	1	Itgb2	16414
ENSMUSG00000000567	302	350	323	116	116	91	327	345	324	111	109	93	218.08	332	104	314	-1669	-12208	2.82218e-20	1.37484e-18	0	9	0.0073	0.0073	TRUE	0.0787	SRY (sex determining region Y)-box 9 [Source:MGI Symbol;Acc:MGI:98371]	11	112782224	112787760	1	Sox9	20682
ENSMUSG00000000693	168	189	207	72	69	57	182	186	208	69	65	58	127.93	192	64	333	-1585	-9075	1.13479e-06	0.000290811	0	0.0144	0.0117	0.0117	TRUE	57	lysyl oxidase-like 3 [Source:MGI Symbol;Acc:MGI:1337004]	6	83034173	83052562	1	Loxl3	16950
ENSMUSG00000000948	31	26	21	7	15	9	34	26	21	7	14	9	18.37	27	10	375	-1415	-3111	0.00186707324512155	0.00749187706358248	0	0.0917	0.0814	0.0814	TRUE	0.3893	predicted gene, 38393 [Source:MGI Symbol;Acc:MGI:5613898]	7	59974149	60005064	-1	Gm38393	NA
ENSMUSG00000001036	658	747	698	230	241	254	712	736	701	219	226	261	475.72	716	235	328	-1608	-16386	2.39838e-47	2.65004e-45	0	0.0049	0.0042	0.0042	TRUE	96	epsin 2 [Source:MGI Symbol;Acc:MGI:1333766]	11	61517249	61579687	-1	Epn2	13855
ENSMUSG00000001053	57	43	55	26	22	23	62	42	55	25	21	24	38.04	53	23	434	-1205	-3.9	9.60278e+09	0.00051666594279018	0	45	38	38	TRUE	0.2648	NEDD4 binding protein 3 [Source:MGI Symbol;Acc:MGI:2442218]	11	51643063	51650842	-1	N4bp3	212706
ENSMUSG00000001123	109	74	77	54	37	40	118	73	77	52	35	41	65.89	89	43	476	-1072	-4.21	2.5527e+09	0.000152641245412523	43	0.0266	0.0296	0.0296	TRUE	0.7278	lectin, galactose binding, soluble 9 [Source:MGI Symbol;Acc:MGI:109496]	11	78962974	78984946	-1	Lgals9	16859
ENSMUSG00000001281	347	380	318	57	61	40	376	374	319	54	57	41	203.6	356	51	143	-2803	-16835	1.35974e-49	1.71349e-47	0.0059	0.0096	9	9	TRUE	0.2219	integrin beta 7 [Source:MGI Symbol;Acc:MGI:96616]	15	102215995	102231944	-1	Itgb7	16421
ENSMUSG00000001663	22	31	29	9	10	13	24	31	29	9	9	13	19.12	28	10	373	-1424	-3275	0.00105836863991137	0.00453357857135048	0	0.0882	0.0711	0.0711	TRUE	0.2053	glutathione S-transferase, theta 1 [Source:MGI Symbol;Acc:MGI:107379]	10	75783813	75798584	-1	Gstt1	14871
ENSMUSG00000002020	101	99	100	32	27	39	109	98	100	31	25	40	67.17	102	32	311	-1686	-6931	417.751	5986.72	0	0.0261	0.0224	0.0224	TRUE	0.3247	latent transforming growth factor beta binding protein 2 [Source:MGI Symbol;Acc:MGI:99502]	12	84783212	84876532	-1	Ltbp2	16997
ENSMUSG00000002803	47	45	59	26	14	11	51	44	59	25	13	11	33.94	51	16	0.32	-1645	-4708	2.50101e+08	1.77704e+09	0.0349	0.0503	0.0485	0.0485	TRUE	0.9424	BTB (POZ) domain containing 6 [Source:MGI Symbol;Acc:MGI:3026623]	12	112976482	112978945	1	Btbd6	399566
ENSMUSG00000002831	268	289	322	72	99	67	290	285	323	69	93	69	188.02	299	77	257	-1961	-12552	3.87442e-22	2.00262e-20	0.0049	0.0102	0.0096	0.0096	TRUE	0.3166	perilipin 4 [Source:MGI Symbol;Acc:MGI:1929709]	17	56100591	56109803	-1	Plin4	57435
ENSMUSG00000002885	222	250	250	141	110	103	240	246	251	135	103	106	180.11	246	115	466	-1103	-7484	7.2299	12.1545	0.0001	0.0106	0.0093	0.0093	TRUE	0.2427	adhesion G protein-coupled receptor E5 [Source:MGI Symbol;Acc:MGI:1347095]	8	83723251	83741326	-1	Adgre5	26364
ENSMUSG00000003032	1870	2154	1878	1110	1025	934	2024	2121	1885	1059	960	958	1501.31	2010	992	494	-1018	-15023	5.19301e-37	4.52474e-35	0.0027	0.0025	0.0026	0.0026	TRUE	0.0417	Kruppel-like factor 4 (gut) [Source:MGI Symbol;Acc:MGI:1342287]	4	55527143	55532466	-1	Klf4	16600
ENSMUSG00000003411	26	31	33	2	0	2	28	31	33	2	0	2	15.96	31	1	42	-4561	-5592	2.24075e+06	2.11691e+07	0	0.1054	0.0884	0.0884	TRUE	0.5257	RAB3B, member RAS oncogene family [Source:MGI Symbol;Acc:MGI:1917158]	4	108879063	108943324	1	Rab3b	69908
ENSMUSG00000003526	28	31	26	7	6	8	30	31	26	7	6	8	17.91	29	7	235	-2089	-4389	1.14005e+09	7.22503e+09	0	0.0941	0.0744	0.0744	TRUE	0.0774	proline dehydrogenase [Source:MGI Symbol;Acc:MGI:97770]	16	18060357	18090203	-1	Prodh	19125
ENSMUSG00000003849	412	445	395	182	183	204	446	438	397	174	171	209	305.84	427	185	432	-1.21	-10.22	1.61812e-11	5.27203e-09	0.0033	0.0068	0.0063	0.0063	TRUE	0.1423	NAD(P)H dehydrogenase, quinone 1 [Source:MGI Symbol;Acc:MGI:103187]	8	107388225	107403206	-1	Nqo1	18104
ENSMUSG00000004113	31	54	52	0	3	1	34	53	52	0	3	1	23.8	46	1	28	-5166	-6507	7658.17	95950.5	0.0411	0.0711	0.0677	0.0677	TRUE	0.7215	calcium channel, voltage-dependent, N type, alpha 1B subunit [Source:MGI Symbol;Acc:MGI:88296]	2	24603887	24763152	-1	Cacna1b	12287
ENSMUSG00000004151	104	115	120	22	32	19	113	113	120	21	30	19	69.46	115	23	204	-2292	-9049	1.44058e-05	0.00036549	0	0.0253	0.0212	0.0212	TRUE	0.3622	ets variant 1 [Source:MGI Symbol;Acc:MGI:99254]	12	38779380	38870484	1	Etv1	14009
ENSMUSG00000004267	84	87	118	38	29	25	91	86	118	36	27	26	64.02	98	30	302	-1726	-6751	1466.31	19998.5	17	0.0273	0.0256	0.0256	TRUE	0.3147	enolase 2, gamma neuronal [Source:MGI Symbol;Acc:MGI:95394]	6	124760053	124769673	-1	Eno2	13807
ENSMUSG00000004347	68	78	101	11	7	9	74	77	101	10	7	9	46.35	84	9	104	-3264	-8.97	2.97276e-05	0.000735855	0	0.0372	0.0338	0.0338	TRUE	0.3131	phosphodiesterase 1C [Source:MGI Symbol;Acc:MGI:108413]	6	56069804	56652487	-1	Pde1c	18575
ENSMUSG00000004552	765	908	891	157	195	183	828	894	895	150	183	188	522.82	872	174	199	-2333	-22661	1.07974e-99	3.5791e-98	0.0019	0.0046	0.0042	0.0042	TRUE	0.1535	cathepsin E [Source:MGI Symbol;Acc:MGI:107361]	1	131638306	131675505	1	Ctse	13034
ENSMUSG00000004633	26	47	58	22	16	24	28	46	58	21	15	25	32.21	44	20	454	-1139	-3206	0.00134640032797045	0.00563080422405194	0.0668	0.0529	0.0553	0.0553	TRUE	0.1768	chimerin 2 [Source:MGI Symbol;Acc:MGI:1917243]	6	54039554	54301810	1	Chn2	69993
ENSMUSG00000004655	1671	1910	1725	421	416	368	1809	1881	1732	402	389	378	1098.37	1807	390	216	-2213	-29884	3.14257e-182	2.08339e-179	0	0.0029	0.0024	0.0024	TRUE	0.0162	aquaporin 1 [Source:MGI Symbol;Acc:MGI:103201]	6	55336432	55348555	1	Aqp1	11826
ENSMUSG00000004885	289	303	254	58	44	43	313	298	255	55	41	44	167.81	289	47	163	-2621	-14.74	3.59073e-35	3.00833e-33	0	0.0113	0.0107	0.0107	TRUE	0.2059	cellular retinoic acid binding protein II [Source:MGI Symbol;Acc:MGI:88491]	3	87948666	87953376	1	Crabp2	12904
ENSMUSG00000004961	37	41	36	1	0	0	40	40	36	1	0	0	19.59	39	0	9	-6803	-5544	2.96477e+06	2.76325e+07	0	0.0861	0.0721	0.0721	TRUE	409	synaptotagmin V [Source:MGI Symbol;Acc:MGI:1926368]	7	4539765	4547541	-1	Syt5	53420
ENSMUSG00000005045	58	60	82	32	28	15	63	59	82	31	26	15	46.05	68	24	355	-1495	-5001	570380	4.47845e+08	0.0323	0.0374	0.0368	0.0368	TRUE	0.5658	chromodomain helicase DNA binding protein 5 [Source:MGI Symbol;Acc:MGI:3036258]	4	152338651	152390194	1	Chd5	269610
ENSMUSG00000005583	291	296	316	166	167	137	315	292	317	158	156	141	229.84	308	152	494	-1019	-7975	0.0151816	2.94891	0	0.0086	0.0069	0.0069	TRUE	0.0424	myocyte enhancer factor 2C [Source:MGI Symbol;Acc:MGI:99458]	13	83504034	83667080	1	Mef2c	17260
ENSMUSG00000006494	144	215	138	62	64	47	156	212	139	59	60	48	112.24	169	56	331	-1596	-7823	0.514422	9.56573	0.0268	0.0162	0.0183	0.0183	TRUE	0.5376	pyruvate dehydrogenase kinase, isoenzyme 1 [Source:MGI Symbol;Acc:MGI:1926119]	2	71873224	71903858	1	Pdk1	228026
ENSMUSG00000006930	7	11	11	1	1	2	8	11	11	1	1	2	5.57	10	1	132	-2921	-3036	0.00239555439586715	0.0093516163410605	0	0.2995	0.2412	0.2412	TRUE	0.1399	huntingtin-associated protein 1 [Source:MGI Symbol;Acc:MGI:1261831]	11	100347327	100356128	-1	Hap1	15114
ENSMUSG00000006958	30	46	29	10	4	10	32	45	29	10	4	10	21.74	35	8	219	-2194	-4817	1.45692e+08	1.0665e+09	39	0.0777	0.0729	0.0729	TRUE	0.6627	chordin [Source:MGI Symbol;Acc:MGI:1313268]	16	20733127	20742384	1	Chrd	12667
ENSMUSG00000007659	632	715	725	352	343	308	684	704	728	336	321	316	514.85	705	324	0.46	-1121	-12.5	7.49296e-22	3.83398e-20	0	0.0046	0.0036	0.0036	TRUE	0.0111	BCL2-like 1 [Source:MGI Symbol;Acc:MGI:88139]	2	152780668	152831728	-1	Bcl2l1	12048
ENSMUSG00000008489	29	41	44	11	5	6	31	40	44	10	5	6	22.88	38	7	184	-2443	-5422	5.88159e+06	5.28789e+07	0	0.0739	0.0649	0.0649	TRUE	0.4977	ELAV like RNA binding protein 1 [Source:MGI Symbol;Acc:MGI:1100887]	4	91250763	91400785	-1	Elavl2	15569
ENSMUSG00000009145	35	41	52	21	18	16	38	40	52	20	17	16	30.63	43	18	409	-1291	-3767	0.00016532135488556	0.000853647145037257	0	0.0556	0.0457	0.0457	TRUE	0.2393	DEAQ RNA-dependent ATPase [Source:MGI Symbol;Acc:MGI:2136388]	6	83057844	83067318	1	Dqx1	93838
ENSMUSG00000009376	1101	1166	1178	542	597	463	1192	1148	1183	517	559	475	845.63	1174	517	441	-1182	-15.2	3.54702e-38	3.27787e-37	0.0011	0.0034	3	3	TRUE	0.0589	met proto-oncogene [Source:MGI Symbol;Acc:MGI:96969]	6	17463800	17573980	1	Met	17295
ENSMUSG00000009687	122	119	115	69	42	66	132	117	115	66	39	68	89.6	121	58	473	-1.08	-5041	4.63709e+06	3.68454e+08	0.0238	0.0199	0.0204	0.0204	TRUE	0.6869	FXYD domain-containing ion transport regulator 5 [Source:MGI Symbol;Acc:MGI:1201785]	7	31032722	31042481	-1	Fxyd5	18301
ENSMUSG00000009731	26	19	26	11	10	5	28	19	26	10	9	5	16.32	24	8	345	-1535	-3191	0.00141823101192414	0.00588600611590074	0	103	0.0877	0.0877	TRUE	0.3256	potassium voltage-gated channel, Shal-related family, member 1 [Source:MGI Symbol;Acc:MGI:96671]	X	7822289	7838280	1	Kcnd1	16506
ENSMUSG00000010476	161	176	192	11	5	7	174	173	193	10	5	7	93.79	180	7	41	-4597	-13429	4.06747e-27	2.53146e-25	0	0.0191	0.0164	0.0164	TRUE	0.3869	early B cell factor 3 [Source:MGI Symbol;Acc:MGI:894289]	7	137193673	137314445	-1	Ebf3	13593
ENSMUSG00000011256	217	272	281	88	119	88	235	268	282	84	111	90	178.42	262	95	364	-1458	-9438	3.79935e-07	1.04383e-05	7	0.0107	0.0101	0.0101	TRUE	0.2218	a disintegrin and metallopeptidase domain 19 (meltrin beta) [Source:MGI Symbol;Acc:MGI:105377]	11	46055992	46147343	1	Adam19	11492
ENSMUSG00000013076	2520	2846	2744	1497	1479	1295	2727	2803	2755	1428	1385	1329	2071.17	2762	1381	0.5	-1	-17987	2.45849e-58	3.86465e-56	0	0.0022	0.0017	0.0017	TRUE	0.0127	angiomotin-like 1 [Source:MGI Symbol;Acc:MGI:1922973]	9	14541966	14645056	-1	Amotl1	75723
ENSMUSG00000013089	184	200	205	61	46	57	199	197	206	58	43	58	126.95	201	53	265	-1917	-10542	5.5196e-12	1.93034e-10	0	0.0145	0.0121	0.0121	TRUE	0.2446	ets variant 5 [Source:MGI Symbol;Acc:MGI:1096867]	16	22381309	22439719	-1	Etv5	104156
ENSMUSG00000013418	27	24	34	6	14	9	29	24	34	6	13	9	19.18	29	9	323	-1629	-3614	0.000301220355575245	0.00146882250777465	0	0.0879	0.0769	0.0769	TRUE	0.3421	beta-1,4-N-acetyl-galactosaminyl transferase 2 [Source:MGI Symbol;Acc:MGI:1342058]	11	95865943	95914891	-1	B4galnt2	14422
ENSMUSG00000014158	123	170	171	53	62	55	133	167	172	51	58	56	106.21	157	55	349	-1519	-7827	0.501021	9.33933	0	17	0.0151	0.0151	TRUE	0.1867	transient receptor potential cation channel, subfamily V, member 4 [Source:MGI Symbol;Acc:MGI:1926945]	5	114622152	114658421	-1	Trpv4	63873
ENSMUSG00000014543	13	24	17	8	5	0	14	24	17	8	5	0	11.18	18	4	228	-2135	-3312	0.000925632060006212	0.00401423141381534	0.2664	0.1498	0.1548	0.1548	TRUE	11568	killer cell lectin-like receptor, subfamily A, member 17 [Source:MGI Symbol;Acc:MGI:2180674]	6	129831154	129876672	-1	Klra17	170733
ENSMUSG00000015112	605	614	672	308	348	299	655	605	675	294	326	307	476.77	645	309	479	-1061	-11176	5.36364e-15	2.17513e-13	0	0.0049	0.0041	0.0041	TRUE	0.0353	solute carrier family 25 (mitochondrial carrier, adenine nucleotide translocator), member 13 [Source:MGI Symbol;Acc:MGI:1354721]	6	6041218	6217173	-1	Slc25a13	50799
ENSMUSG00000015224	50	43	51	13	22	9	54	42	51	12	21	9	31.65	49	14	288	-1795	-4976	6.4911e+07	5.04723e+08	0.0091	0.0538	0.0491	0.0491	TRUE	0.7586	cytochrome P450, family 2, subfamily j, polypeptide 9 [Source:MGI Symbol;Acc:MGI:1921769]	4	96568429	96591578	-1	Cyp2j9	74519
ENSMUSG00000015243	191	230	257	8	6	6	207	227	258	8	6	6	118.44	231	7	28	-5155	-14473	1.78209e-33	1.40794e-31	0	0.0154	0.0142	0.0142	TRUE	0.1016	ATP-binding cassette, sub-family A (ABC1), member 1 [Source:MGI Symbol;Acc:MGI:99607]	4	53030787	53159895	-1	Abca1	11303
ENSMUSG00000015647	865	1120	1060	508	511	386	936	1103	1064	485	478	396	743.77	1034	453	438	-1.19	-13011	1.05617e-24	6.03162e-23	0.0079	0.0036	0.0045	0.0045	TRUE	0.1375	laminin, alpha 5 [Source:MGI Symbol;Acc:MGI:105382]	2	180176373	180225859	-1	Lama5	16776
ENSMUSG00000015766	1818	1873	1901	937	990	853	1968	1845	1909	894	927	875	1402.83	1907	899	472	-1085	-17247	1.18403e-52	1.58369e-51	0	0.0026	2	2	TRUE	0.0099	epidermal growth factor receptor pathway substrate 8 [Source:MGI Symbol;Acc:MGI:104684]	6	137477245	137654876	-1	Eps8	13860
ENSMUSG00000016024	26	9	16	4	2	0	28	9	16	4	2	0	9.79	18	2	0.11	-3.19	-3962	7.42505e+09	0.000406378761358396	0.3092	0.1708	0.1866	0.1866	TRUE	0.2462	lipopolysaccharide binding protein [Source:MGI Symbol;Acc:MGI:1098776]	2	158306493	158332852	1	Lbp	16803
ENSMUSG00000016239	135	168	148	52	60	44	146	165	149	50	56	45	101.85	153	50	328	-1606	-8236	0.0178084	0.370454	0	0.0177	0.0144	0.0144	TRUE	0.0873	LON peptidase N-terminal domain and ring finger 3 [Source:MGI Symbol;Acc:MGI:1921615]	X	36328353	36362341	1	Lonrf3	74365
ENSMUSG00000016494	19	11	12	3	4	3	21	11	12	3	4	3	8.86	15	3	224	-2158	-3121	0.00180488933729168	0.00728158196155379	0	0.1888	0.1589	0.1589	TRUE	0.5695	CD34 antigen [Source:MGI Symbol;Acc:MGI:88329]	1	194938819	194961279	1	Cd34	12490
ENSMUSG00000016624	14	16	24	5	2	3	15	16	24	5	2	3	10.79	18	3	176	-2503	-3813	0.000137411272217696	0.000720016178273342	0	0.1552	0.1328	0.1328	TRUE	0.3918	PHD finger protein 21B [Source:MGI Symbol;Acc:MGI:2443812]	15	84785381	84856049	-1	Phf21b	271305
ENSMUSG00000017314	47	61	47	17	26	15	51	60	47	16	24	15	35.68	53	18	355	-1495	-4583	4.57259e+08	3.11124e+09	0	0.0479	41	41	TRUE	392	membrane protein, palmitoylated 2 (MAGUK p55 subfamily member 2) [Source:MGI Symbol;Acc:MGI:1858257]	11	102057015	102088515	-1	Mpp2	50997
ENSMUSG00000017493	818	843	786	115	106	67	885	830	789	110	99	69	463.73	835	93	111	-3166	-25288	4.34309e-127	1.8921e-124	0.0133	5	0.0055	0.0055	TRUE	0.4643	insulin-like growth factor binding protein 4 [Source:MGI Symbol;Acc:MGI:96439]	11	99041244	99054392	1	Igfbp4	16010
ENSMUSG00000017607	29	22	28	3	4	2	31	22	28	3	4	2	14.97	27	3	108	-3216	-5164	2.4195e+06	2.00083e+08	0	0.1122	0.0936	0.0936	TRUE	0.1964	tensin 4 [Source:MGI Symbol;Acc:MGI:2144377]	11	99065678	99089306	-1	Tns4	217169
ENSMUSG00000017724	87	88	95	2	4	5	94	87	95	2	4	5	47.83	92	4	39	-4691	-9604	7.65811e-08	2.19082e-06	0	0.0361	0.0301	0.0301	TRUE	0.2709	ets variant 4 [Source:MGI Symbol;Acc:MGI:99423]	11	101769742	101785371	-1	Etv4	18612
ENSMUSG00000017978	8	5	8	0	0	1	9	5	8	0	0	1	3.77	7	0	48	-4369	-3084	0.00204246194768142	0.00810605408075124	0	0.4411	0.3752	0.3752	TRUE	0.4764	Ca2+-dependent activator protein for secretion 2 [Source:MGI Symbol;Acc:MGI:2443963]	6	23262773	23839421	-1	Cadps2	320405
ENSMUSG00000018909	76	98	98	48	42	45	82	97	98	46	39	46	68.08	92	44	473	-1081	-4744	2.09461e+08	1.50725e+09	0	0.0258	0.0208	0.0208	TRUE	0.0853	arrestin, beta 1 [Source:MGI Symbol;Acc:MGI:99473]	7	99535466	99606771	1	Arrb1	109689
ENSMUSG00000018983	88	104	97	34	36	47	95	102	97	32	34	48	68.24	98	38	386	-1373	-5832	546509	5.5815e+06	0	0.0257	22	22	TRUE	0.3842	E2F transcription factor 2 [Source:MGI Symbol;Acc:MGI:1096341]	4	136172394	136196057	1	E2f2	242705
ENSMUSG00000019102	2869	3114	2834	137	162	135	3105	3067	2845	131	152	139	1573.03	3006	141	47	-4.42	-48659	0	0	0	0.0025	0.0023	0.0023	TRUE	0.0547	aldehyde dehydrogenase family 3, subfamily A1 [Source:MGI Symbol;Acc:MGI:1353451]	11	61207537	61218421	1	Aldh3a1	11670
ENSMUSG00000019775	101	137	157	14	23	22	109	135	158	13	22	23	76.55	134	19	142	-2811	-10415	2.12466e-11	7.18331e-10	0.0246	0.0231	0.0233	0.0233	TRUE	0.1608	regulator of G-protein signaling 17 [Source:MGI Symbol;Acc:MGI:1927469]	10	5825663	5922400	-1	Rgs17	56533
ENSMUSG00000019894	318	358	350	156	154	139	344	353	351	149	144	143	247.3	349	145	416	-1267	-10283	8.42169e-13	2.77952e-10	0	0.0081	0.0061	0.0061	TRUE	0.0051	solute carrier family 6 (neurotransmitter transporter), member 15 [Source:MGI Symbol;Acc:MGI:2143484]	10	103367783	103419377	1	Slc6a15	103098
ENSMUSG00000019966	737	785	802	165	195	150	798	773	805	157	183	154	478.31	792	165	208	-2264	-21977	4.76836e-93	1.42565e-90	0	0.0049	0.0041	0.0041	TRUE	0.0987	kit ligand [Source:MGI Symbol;Acc:MGI:96974]	10	100015630	100100416	1	Kitl	17311
ENSMUSG00000020334	53	49	37	15	11	11	57	48	37	14	10	11	29.78	47	12	252	-1989	-5.31	1.09766e+07	9.53139e+07	0	0.0571	0.0498	0.0498	TRUE	0.1013	solute carrier family 22 (organic cation transporter), member 4 [Source:MGI Symbol;Acc:MGI:1353479]	11	53983123	54028090	-1	Slc22a4	30805
ENSMUSG00000020387	704	794	775	346	371	348	762	782	778	330	347	357	559.43	774	345	445	-1167	-13486	1.89159e-27	1.19186e-25	0	0.0044	0.0033	0.0033	TRUE	0.0159	jade family PHD finger 2 [Source:MGI Symbol;Acc:MGI:1924151]	11	51813455	51857653	-1	Jade2	76901
ENSMUSG00000020407	27	25	23	4	4	5	29	25	23	4	4	5	14.94	26	4	164	-2604	-4659	3.18271e+08	2.22004e+09	0	0.1125	0.09	0.09	TRUE	0.0873	uridine phosphorylase 1 [Source:MGI Symbol;Acc:MGI:1097668]	11	9118103	9136170	1	Upp1	22271
ENSMUSG00000020427	129	133	126	39	35	35	140	131	127	37	33	36	83.83	133	35	267	-1907	-8.74	0.000232302	0.00546626	0	0.0212	0.0167	0.0167	TRUE	0.03	insulin-like growth factor binding protein 3 [Source:MGI Symbol;Acc:MGI:96438]	11	7206086	7213923	-1	Igfbp3	16009
ENSMUSG00000020435	29	25	31	9	9	9	31	25	31	9	8	9	18.9	29	9	301	-1731	-3.88	0.000104392622454431	0.00055754070304209	0	0.0892	0.0702	0.0702	TRUE	0.1193	oxysterol binding protein 2 [Source:MGI Symbol;Acc:MGI:1921559]	11	3703731	3863903	-1	Osbp2	74309
ENSMUSG00000020601	86	101	111	24	27	17	93	99	111	23	25	17	61.6	101	22	217	-2207	-8308	0.00976229	0.207319	0	0.0283	0.0237	0.0237	TRUE	0.1701	tribbles pseudokinase 2 [Source:MGI Symbol;Acc:MGI:2145021]	12	15791727	15816922	-1	Trib2	217410
ENSMUSG00000020620	119	150	170	80	78	47	129	148	171	76	73	48	107.46	149	66	443	-1175	-5892	381658	3.98052e+06	24	0.0168	0.0179	0.0179	TRUE	0.3744	ATP-binding cassette, sub-family A (ABC1), member 8b [Source:MGI Symbol;Acc:MGI:1351668]	11	109932190	109995845	-1	Abca8b	27404
ENSMUSG00000020656	16	14	16	3	6	3	17	14	16	3	6	3	9.79	16	4	247	-2.02	-3157	0.00159246597700827	0.00650989844971103	0	0.1709	0.1371	0.1371	TRUE	0.2834	grainyhead like transcription factor 1 [Source:MGI Symbol;Acc:MGI:2182540]	12	24572283	24617391	1	Grhl1	195733
ENSMUSG00000020682	219	227	256	92	89	80	237	224	257	88	83	82	161.8	239	84	353	-1502	-9699	3.05391e-08	8.97227e-07	0	0.0117	0.0094	0.0094	TRUE	0.0477	matrix metallopeptidase 28 (epilysin) [Source:MGI Symbol;Acc:MGI:2153062]	11	83440768	83463071	-1	Mmp28	118453
ENSMUSG00000020774	128	137	166	28	21	15	139	135	167	27	20	15	83.65	147	21	141	-2827	-11122	9.76523e-15	3.91843e-13	0.0084	0.0212	0.0196	0.0196	TRUE	0.3814	aspartoacylase [Source:MGI Symbol;Acc:MGI:87914]	11	73304992	73329596	-1	Aspa	11484
ENSMUSG00000020788	38	54	36	8	5	8	41	53	36	8	5	8	25.16	43	7	156	-2676	-6035	159124	1.73557e+06	0	0.0673	0.0587	0.0587	TRUE	0.3002	ATPase, Ca++ transporting, ubiquitous [Source:MGI Symbol;Acc:MGI:1194503]	11	72961169	72993044	1	Atp2a3	53313
ENSMUSG00000020901	72	77	72	24	20	25	78	76	72	23	19	26	48.89	75	23	297	-1752	-6252	40620.1	472445	0	0.0353	0.0281	0.0281	TRUE	127	phosphoinositide-3-kinase regulatory subunit 5 [Source:MGI Symbol;Acc:MGI:2443588]	11	68432121	68497849	1	Pik3r5	320207
ENSMUSG00000020937	664	786	746	324	319	266	719	774	749	309	299	273	520.41	747	294	393	-1347	-14614	2.29516e-34	1.85168e-32	0	0.0046	0.0038	0.0038	TRUE	0.0414	phospholipase C, delta 3 [Source:MGI Symbol;Acc:MGI:107451]	11	103070304	103101658	-1	Plcd3	72469
ENSMUSG00000021047	68	79	98	6	6	5	74	78	98	6	6	5	44.38	83	6	66	-3921	-9286	1.60422e-06	4.26152e-05	0	0.0388	0.0341	0.0341	TRUE	0.2381	NOVA alternative splicing regulator 1 [Source:MGI Symbol;Acc:MGI:104297]	12	46694517	46818929	-1	Nova1	664883
ENSMUSG00000021281	1173	1284	1255	439	456	406	1270	1265	1260	419	427	417	842.75	1265	421	333	-1587	-21231	4.92354e-86	1.34061e-83	0	0.0034	0.0025	0.0025	TRUE	0.0019	tumor necrosis factor, alpha-induced protein 2 [Source:MGI Symbol;Acc:MGI:104960]	12	111442469	111455018	1	Tnfaip2	21928
ENSMUSG00000021294	30	31	26	8	9	3	32	31	26	8	8	3	18.04	30	6	217	-2204	-4516	6.28943e+07	4.18783e+09	0	0.0934	0.0791	0.0791	TRUE	477	kinesin family member 26A [Source:MGI Symbol;Acc:MGI:2447072]	12	112146208	112181747	1	Kif26a	668303
ENSMUSG00000021403	36	51	58	15	9	16	39	50	58	14	8	16	31.1	49	13	264	-1922	-5222	1.76842e+07	1.48895e+08	0	0.0548	0.0499	0.0499	TRUE	0.2761	serine (or cysteine) peptidase inhibitor, clade B, member 9b [Source:MGI Symbol;Acc:MGI:894668]	13	33027416	33041884	1	Serpinb9b	20706
ENSMUSG00000021575	123	131	126	72	67	57	133	129	127	69	63	58	96.43	130	63	489	-1031	-5423	5.84583e+06	5.25883e+07	0	0.0186	0.0145	0.0145	TRUE	0.0493	aryl-hydrocarbon receptor repressor [Source:MGI Symbol;Acc:MGI:1333776]	13	74211118	74292331	-1	Ahrr	11624
ENSMUSG00000021596	33	46	50	24	11	14	36	45	50	23	10	14	29.8	44	16	362	-1466	-4014	5.97643e+09	0.000332707396202714	32	0.0571	0.0538	0.0538	TRUE	0.7534	multiple C2 domains, transmembrane 1 [Source:MGI Symbol;Acc:MGI:1926021]	13	76384535	77031810	1	Mctp1	78771
ENSMUSG00000021747	37	48	51	20	17	12	40	47	51	19	16	12	30.97	46	16	342	-1547	-4452	8.52533e+08	5.53721e+09	0	55	0.0453	0.0453	TRUE	0.1649	RIKEN cDNA 4930452B06 gene [Source:MGI Symbol;Acc:MGI:1926154]	14	8431192	8666240	-1	4930452B06Rik	74430
ENSMUSG00000021792	36	38	39	10	12	13	39	37	39	10	11	13	24.94	38	11	295	-1764	-4531	5.87719e+08	3.93568e+09	0	0.0679	0.0531	0.0531	TRUE	0.0833	peroxiredoxin like 2A [Source:MGI Symbol;Acc:MGI:1917814]	14	40993740	41013788	-1	Prxl2a	70564
ENSMUSG00000021846	180	217	213	60	61	40	195	214	214	57	57	41	129.63	208	52	0.25	-1998	-10929	8.3774e-14	3.25035e-12	0	0.0142	0.0123	0.0123	TRUE	0.2599	pellino 2 [Source:MGI Symbol;Acc:MGI:1891445]	14	48120823	48281575	1	Peli2	93834
ENSMUSG00000021895	165	194	206	34	27	28	179	191	207	32	25	29	110.49	192	29	0.15	-2739	-12749	3.14362e-23	1.71193e-21	0	0.0164	0.0137	0.0137	TRUE	84	Rho guanine nucleotide exchange factor (GEF) 3 [Source:MGI Symbol;Acc:MGI:1918954]	14	27114899	27403911	1	Arhgef3	71704
ENSMUSG00000021903	30	39	43	9	10	7	32	38	43	9	9	7	23.2	38	8	221	-2.18	-5128	2.92875e+06	2.39194e+08	0	0.0729	59	59	TRUE	0.1095	polypeptide N-acetylgalactosaminyltransferase 15 [Source:MGI Symbol;Acc:MGI:1926004]	14	32028989	32062197	1	Galnt15	78754
ENSMUSG00000021950	291	326	277	125	100	120	315	321	278	119	94	123	208.36	305	112	367	-1446	-10084	6.48232e-10	2.05067e-08	0.0055	0.0094	0.0088	0.0088	TRUE	0.2131	annexin A8 [Source:MGI Symbol;Acc:MGI:1201374]	14	34085981	34100571	1	Anxa8	11752
ENSMUSG00000022032	601	666	673	51	46	56	650	656	676	49	43	57	355.21	661	50	75	-3737	-25391	3.16668e-129	1.42016e-125	0	0.0061	5	5	TRUE	0.1444	scavenger receptor class A, member 5 [Source:MGI Symbol;Acc:MGI:1918395]	14	65666403	65764826	1	Scara5	71145
ENSMUSG00000022246	2730	3135	3192	1236	1245	1096	2955	3088	3205	1179	1165	1125	2119.4	3083	1156	375	-1414	-24459	4.00375e-118	1.56536e-115	0.0008	0.0022	0.0018	0.0018	TRUE	0.0158	retinoic acid induced 14 [Source:MGI Symbol;Acc:MGI:1922896]	15	10568969	10714624	-1	Rai14	75646
ENSMUSG00000022265	3504	3877	4108	1443	1503	1197	3792	3818	4124	1377	1407	1228	2624.54	3911	1337	342	-1548	-24994	7.15659e-124	2.94929e-121	0.0029	2	0.0023	0.0023	TRUE	0.0604	progressive ankylosis [Source:MGI Symbol;Acc:MGI:3045421]	15	27466677	27594909	1	Ank	11732
ENSMUSG00000022309	194	210	265	107	110	130	210	207	266	102	103	133	170.22	228	113	494	-1016	-6337	23377.5	282905	0.0157	0.0112	12	12	TRUE	249	angiopoietin 1 [Source:MGI Symbol;Acc:MGI:108448]	15	42424723	42676977	-1	Angpt1	11600
ENSMUSG00000022340	238	233	310	149	145	105	258	229	311	142	136	108	197.33	266	129	484	-1047	-6846	761.344	10601.8	0.0173	0.0098	0.0112	0.0112	TRUE	249	syntabulin (syntaxin-interacting) [Source:MGI Symbol;Acc:MGI:2442392]	15	44671856	44788063	-1	Sybu	319613
ENSMUSG00000022371	41	45	41	7	8	3	44	44	41	7	7	3	24.52	43	6	134	-2898	-6302	29387.7	348719	0	0.0691	57	57	TRUE	0.3518	collagen, type XIV, alpha 1 [Source:MGI Symbol;Acc:MGI:1341272]	15	55307750	55520803	1	Col14a1	12818
ENSMUSG00000022415	53	78	67	40	30	22	57	77	67	38	28	23	48.38	67	30	441	-1.18	-4208	2.57471e+09	0.000153656328821875	0.0143	0.0357	0.0327	0.0327	TRUE	0.3422	synaptogyrin 1 [Source:MGI Symbol;Acc:MGI:1328323]	15	80091334	80119501	1	Syngr1	20972
ENSMUSG00000022419	303	331	378	138	110	104	328	326	380	132	103	107	229.13	345	114	0.33	-1598	-11457	2.17836e-16	9.35652e-15	0.0062	0.0086	0.0083	0.0083	TRUE	0.1938	DEP domain containing MTOR-interacting protein [Source:MGI Symbol;Acc:MGI:2146322]	15	55112317	55259271	1	Deptor	97998
ENSMUSG00000022425	47	55	40	13	7	6	51	54	40	12	7	6	28.38	48	8	174	-2526	-6157	74167.7	842077	0	0.0599	53	53	TRUE	0.5685	ectonucleotide pyrophosphatase/phosphodiesterase 2 [Source:MGI Symbol;Acc:MGI:1321390]	15	54838901	54952892	-1	Enpp2	18606
ENSMUSG00000022438	834	942	882	397	341	371	903	928	886	379	319	381	632.44	906	360	397	-1333	-15133	9.87036e-38	9.06646e-36	0.0017	4	0.0037	0.0037	TRUE	0.1127	parvin, beta [Source:MGI Symbol;Acc:MGI:2153063]	15	84232043	84315688	1	Parvb	170736
ENSMUSG00000022469	205	225	229	41	36	35	222	222	230	39	34	36	130.35	225	36	161	-2631	-13633	2.55387e-28	1.67851e-26	0	0.0141	0.0112	0.0112	TRUE	0.0367	Rap guanine nucleotide exchange factor (GEF) 3 [Source:MGI Symbol;Acc:MGI:2441741]	15	97744770	97767972	-1	Rapgef3	223864
ENSMUSG00000022575	53	55	64	15	29	19	57	54	64	14	27	19	39.46	58	20	347	-1525	-4865	1.14733e+08	8.58415e+08	0	0.0435	0.0383	0.0383	TRUE	0.5061	gasdermin D [Source:MGI Symbol;Acc:MGI:1916396]	15	75862327	75867408	1	Gsdmd	69146
ENSMUSG00000022594	186	210	185	89	75	67	201	207	186	85	70	69	136.29	198	75	377	-1406	-8369	0.00579308	0.125295	0	0.0136	0.0113	0.0113	TRUE	136	Ly6/neurotoxin 1 [Source:MGI Symbol;Acc:MGI:1345180]	15	74747852	74753046	-1	Lynx1	23936
ENSMUSG00000022596	40	43	51	0	0	0	43	42	51	0	0	0	22.81	45	0	4	-7996	-6548	5832.81	73808.1	0	0.0741	0.0635	0.0635	TRUE	0.0913	secreted Ly6/Plaur domain containing 1 [Source:MGI Symbol;Acc:MGI:1930923]	15	74724318	74728034	-1	Slurp1	57277
ENSMUSG00000022598	76	92	76	1	3	4	82	91	76	1	3	4	42.84	83	3	31	-5003	-8899	5.65311e-05	0.00137259	0	0.0401	0.0343	0.0343	TRUE	0.3784	prostate stem cell antigen [Source:MGI Symbol;Acc:MGI:1919623]	15	74714839	74717069	1	Psca	72373
ENSMUSG00000022636	130	130	142	47	56	66	141	128	143	45	52	68	96.05	137	55	0.4	-1322	-6565	5194.09	66331.2	1	0.0187	0.0166	0.0166	TRUE	0.3336	activated leukocyte cell adhesion molecule [Source:MGI Symbol;Acc:MGI:1313266]	16	52248996	52454074	-1	Alcam	11658
ENSMUSG00000022847	8	25	25	4	4	6	9	25	25	4	4	6	12.02	20	5	233	-2104	-3418	0.000630075955844156	0.00284916909095839	0	0.1395	0.14	0.14	TRUE	11823	thrombopoietin [Source:MGI Symbol;Acc:MGI:101875]	16	20724454	20734511	-1	Thpo	21832
ENSMUSG00000023032	52	67	59	13	24	18	56	66	59	12	22	18	39.14	60	17	294	-1767	-5549	2.87523e+06	2.68472e+07	0	0.0438	0.0373	0.0373	TRUE	0.3746	solute carrier family 4 (anion exchanger), member 8 [Source:MGI Symbol;Acc:MGI:1928745]	15	100761747	100823968	1	Slc4a8	59033
ENSMUSG00000023045	220	228	225	51	56	40	238	225	226	49	52	41	138.45	230	47	207	-2272	-12641	1.25105e-22	6.60067e-21	0	0.0134	0.0108	0.0108	TRUE	0.1046	sterol O-acyltransferase 2 [Source:MGI Symbol;Acc:MGI:1332226]	15	102150526	102163469	1	Soat2	223920
ENSMUSG00000023046	154	163	164	11	13	13	167	161	165	10	12	13	87.98	164	12	73	-3775	-13083	4.10805e-27	2.38173e-23	0	0.0203	0.0163	0.0163	TRUE	0.0492	insulin-like growth factor binding protein 6 [Source:MGI Symbol;Acc:MGI:96441]	15	102144362	102149511	1	Igfbp6	16012
ENSMUSG00000023243	66	76	61	33	41	27	71	75	61	31	38	28	50.85	69	32	471	-1085	-4.1	4.13633e+09	0.000238288146598454	0	34	0.0282	0.0282	TRUE	178	potassium channel, subfamily K, member 5 [Source:MGI Symbol;Acc:MGI:1336175]	14	20140057	20181809	-1	Kcnk5	16529
ENSMUSG00000023367	1213	1318	1246	580	583	468	1313	1298	1251	553	546	480	906.88	1287	526	409	-1288	-16.93	2.69084e-50	3.41916e-48	1	0.0032	0.0029	0.0029	TRUE	0.0674	transmembrane protein 176A [Source:MGI Symbol;Acc:MGI:1913308]	6	48840919	48847071	1	Tmem176a	66058
ENSMUSG00000023913	70	65	60	8	9	5	76	64	60	8	8	5	36.87	67	7	107	-3228	-8.08	0.0647119	0.128984	0	0.0464	0.0391	0.0391	TRUE	0.1444	phospholipase A2, group VII (platelet-activating factor acetylhydrolase, plasma) [Source:MGI Symbol;Acc:MGI:1351327]	17	43568098	43612201	1	Pla2g7	27226
ENSMUSG00000023990	32	43	50	25	19	21	35	42	50	24	18	22	31.73	42	21	496	-1013	-3039	0.00237050034928045	0.00925855259370601	0	0.0537	0.0449	0.0449	TRUE	0.1119	transcription factor EB [Source:MGI Symbol;Acc:MGI:103270]	17	47737030	47792419	1	Tfeb	21425
ENSMUSG00000024053	50	52	40	22	15	10	54	51	40	21	14	10	31.8	48	15	313	-1676	-4719	2.3741e+08	1.69398e+09	0.0114	0.0536	0.0484	0.0484	TRUE	0.5499	elastin microfibril interfacer 2 [Source:MGI Symbol;Acc:MGI:2389136]	17	71252172	71311978	-1	Emilin2	246707
ENSMUSG00000024066	277	268	254	100	94	59	300	264	255	95	88	61	177.12	273	81	299	-1741	-10675	1.33566e-12	4.87227e-11	0.0157	0.0108	0.0113	0.0113	TRUE	0.4491	xanthine dehydrogenase [Source:MGI Symbol;Acc:MGI:98973]	17	73883895	73950196	-1	Xdh	22436
ENSMUSG00000024109	20	31	31	7	12	6	22	31	31	7	11	6	17.89	28	8	0.29	-1787	-3807	0.0001407304699816	0.000736648886467365	0	0.0941	0.0802	0.0802	TRUE	0.3884	neurexin I [Source:MGI Symbol;Acc:MGI:1096391]	17	90033631	91093071	-1	Nrxn1	18189
ENSMUSG00000024164	22	34	30	9	11	8	24	33	30	9	10	8	19.08	29	9	0.31	-1.69	-3804	0.000142366531574378	0.000743935871640205	0	0.0883	71	71	TRUE	0.1592	complement component 3 [Source:MGI Symbol;Acc:MGI:88227]	17	57203970	57228136	-1	C3	12266
ENSMUSG00000024197	331	349	313	55	84	56	358	344	314	52	79	57	200.8	339	63	186	-2426	-15099	1.6349e-37	1.46641e-35	0.0067	0.0097	0.0094	0.0094	TRUE	0.4405	perilipin 3 [Source:MGI Symbol;Acc:MGI:1914155]	17	56277476	56292873	-1	Plin3	66905
ENSMUSG00000024206	80	87	95	36	49	30	87	86	95	34	46	31	63.11	89	37	416	-1266	-5224	1.75356e+07	1.47725e+08	0	0.0277	0.0235	0.0235	TRUE	333	regulatory factor X, 2 (influences HLA class II expression) [Source:MGI Symbol;Acc:MGI:106583]	17	56775897	56831013	-1	Rfx2	19725
ENSMUSG00000024210	52	45	50	19	27	16	56	44	50	18	25	16	35.1	50	20	399	-1327	-4106	4.02219e+09	0.000232401599793842	0	0.0487	0.0408	0.0408	TRUE	312	inositol hexaphosphate kinase 3 [Source:MGI Symbol;Acc:MGI:3045325]	17	27143965	27167795	-1	Ip6k3	271424
ENSMUSG00000024617	29	38	31	9	18	13	31	37	31	9	17	13	23.12	33	13	388	-1366	-3427	0.000610233690475795	0.00276738048514447	0	0.0732	0.0616	0.0616	TRUE	0.3795	calcium/calmodulin-dependent protein kinase II alpha [Source:MGI Symbol;Acc:MGI:88256]	18	60925618	60988152	1	Camk2a	12322
ENSMUSG00000024646	757	814	873	260	262	254	819	802	876	248	245	261	541.91	832	251	302	-1729	-18665	9.59406e-64	1.66239e-61	0	0.0045	0.0036	0.0036	TRUE	0.0256	cytochrome b5 type A (microsomal) [Source:MGI Symbol;Acc:MGI:1926952]	18	84838704	84879871	1	Cyb5a	109672
ENSMUSG00000024661	10233	11345	10315	5680	5295	5182	11075	11173	10356	5420	4957	5317	8049.75	10868	5231	481	-1055	-21048	2.36363e-84	6.21391e-82	0.0017	0.0016	0.0017	0.0017	TRUE	0.0258	ferritin heavy polypeptide 1 [Source:MGI Symbol;Acc:MGI:95588]	19	9980598	9985098	1	Fth1	14319
ENSMUSG00000024743	172	203	191	43	41	35	186	200	192	41	38	36	115.53	193	38	0.2	-2324	-11.85	2.15986e-18	9.77257e-17	0	0.0158	0.0124	0.0124	TRUE	26	synaptotagmin VII [Source:MGI Symbol;Acc:MGI:1859545]	19	10389090	10453180	1	Syt7	54525
ENSMUSG00000025002	14	13	14	2	1	6	15	13	14	2	1	6	8.5	14	3	0.21	-2.25	-3114	0.00184743626633073	0.00742872051397968	0	0.1965	0.1746	0.1746	TRUE	10719	cytochrome P450, family 2, subfamily c, polypeptide 55 [Source:MGI Symbol;Acc:MGI:1919332]	19	39007019	39042693	1	Cyp2c55	72082
ENSMUSG00000025083	1018	1123	1157	516	564	479	1102	1106	1162	492	528	492	813.54	1123	504	449	-1156	-15241	1.90049e-38	1.76699e-36	0	0.0034	0.0027	0.0027	TRUE	0.0207	actin filament associated protein 1-like 2 [Source:MGI Symbol;Acc:MGI:2147658]	19	56912361	57008228	-1	Afap1l2	226250
ENSMUSG00000025089	489	547	558	98	84	79	529	539	560	94	79	81	313.57	543	85	156	-2685	-20665	7.1116e-81	1.74899e-78	0	0.0067	0.0055	0.0055	TRUE	0.0866	glial cell line derived neurotrophic factor family receptor alpha 1 [Source:MGI Symbol;Acc:MGI:1100842]	19	58235604	58455909	-1	Gfra1	14585
ENSMUSG00000025176	48	59	49	22	22	16	52	58	49	21	21	16	36.21	53	19	365	-1454	-4597	4.28718e+08	2.93012e+09	0	0.0472	0.0374	0.0374	TRUE	0.0885	4-hydroxy-2-oxoglutarate aldolase 1 [Source:MGI Symbol;Acc:MGI:1914682]	19	42045610	42070953	1	Hoga1	67432
ENSMUSG00000025185	1268	1452	1358	631	596	543	1372	1430	1363	602	558	557	980.5	1388	572	412	-1278	-17881	1.64885e-57	2.51416e-55	0	0.0031	0.0025	0.0025	TRUE	0.0244	lysyl oxidase-like 4 [Source:MGI Symbol;Acc:MGI:1914823]	19	42593982	42612813	-1	Loxl4	67573
ENSMUSG00000025314	417	462	520	213	224	203	451	455	522	203	210	208	341.61	476	207	435	-1202	-10857	1.85581e-13	7.02169e-12	0	0.0063	0.0054	0.0054	TRUE	0.0832	protein tyrosine phosphatase, receptor type, J [Source:MGI Symbol;Acc:MGI:104574]	2	90429754	90580647	-1	Ptprj	19271
ENSMUSG00000025413	484	502	468	227	212	219	524	494	470	217	198	225	354.65	496	213	0.43	-1218	-11296	1.38035e-15	5.68854e-15	0	0.0061	0.0051	0.0051	TRUE	0.0412	tetratricopeptide repeat domain 4 [Source:MGI Symbol;Acc:MGI:1919604]	4	106662256	106678944	-1	Ttc4	72354
ENSMUSG00000025504	102	97	99	7	5	9	110	96	99	7	5	9	54.32	102	7	67	-3902	-10304	6.73903e-12	2.229e-09	0	0.0319	27	27	TRUE	0.2285	EPS8-like 2 [Source:MGI Symbol;Acc:MGI:2138828]	7	141338880	141363020	1	Eps8l2	98845
ENSMUSG00000025608	275	251	272	87	84	70	298	247	273	83	79	72	175.23	273	78	286	-1806	-11584	4.99538e-17	2.18251e-15	0	0.0109	0.0094	0.0094	TRUE	0.0753	podocalyxin-like [Source:MGI Symbol;Acc:MGI:1351317]	6	31519488	31563981	-1	Podxl	27205
ENSMUSG00000025736	115	135	134	52	50	34	124	133	135	50	47	35	87.21	131	44	336	-1574	-7467	8.17541	136.988	0	0.0204	17	17	TRUE	0.2345	jumonji domain containing 8 [Source:MGI Symbol;Acc:MGI:1919356]	17	25828867	25831843	1	Jmjd8	72106
ENSMUSG00000025780	30	46	47	4	4	2	32	45	47	4	4	2	22.43	41	3	77	-3691	-6562	5311.67	67606.3	0	0.0754	0.0655	0.0655	TRUE	0.2712	inter-alpha (globulin) inhibitor H5 [Source:MGI Symbol;Acc:MGI:1925751]	2	10153571	10256529	1	Itih5	209378
ENSMUSG00000025791	336	361	334	131	93	123	364	356	335	125	87	126	232.13	352	113	0.32	-1643	-11598	4.22777e-17	1.85244e-15	0.0099	0.0086	0.0087	0.0087	TRUE	412	phosphoglucomutase 1 [Source:MGI Symbol;Acc:MGI:97565]	4	99929414	99987294	1	Pgm1	72157
ENSMUSG00000025911	40	62	59	27	27	23	43	61	59	26	25	24	39.7	54	25	456	-1134	-3781	0.000156003367243483	0.000810197324158254	0	0.0432	0.0359	0.0359	TRUE	0.2601	alcohol dehydrogenase, iron containing, 1 [Source:MGI Symbol;Acc:MGI:1923437]	1	9547948	9580673	1	Adhfe1	76187
ENSMUSG00000026126	21	16	15	4	3	1	23	16	15	4	3	1	10.2	18	3	145	-2788	-3965	7.33126e+09	0.000401678038867468	0	0.1641	0.1393	0.1393	TRUE	0.2865	protein tyrosine phosphatase, non-receptor type 18 [Source:MGI Symbol;Acc:MGI:108410]	1	34459762	34475733	1	Ptpn18	19253
ENSMUSG00000026222	48	44	37	21	9	12	52	43	37	20	8	12	28.87	44	13	308	-1698	-4494	6.99833e+08	4.6175e+09	0.0302	0.0589	0.0555	0.0555	TRUE	0.6661	nuclear antigen Sp100 [Source:MGI Symbol;Acc:MGI:109561]	1	85649988	85709998	1	Sp100	20684
ENSMUSG00000026249	294	328	286	75	80	58	318	323	287	72	75	60	189.06	309	69	222	-2169	-13958	2.79728e-31	1.98386e-28	0	0.0102	0.0087	0.0087	TRUE	0.1166	serine (or cysteine) peptidase inhibitor, clade E, member 2 [Source:MGI Symbol;Acc:MGI:101780]	1	79794197	79861180	-1	Serpine2	20720
ENSMUSG00000026315	264	288	269	110	125	111	286	284	270	105	117	114	195.89	280	112	0.4	-1321	-9.53	1.57111e-07	4.39564e-06	0	0.0099	0.0077	0.0077	TRUE	0.0307	serine (or cysteine) peptidase inhibitor, clade B, member 8 [Source:MGI Symbol;Acc:MGI:894657]	1	107590006	107610484	1	Serpinb8	20725
ENSMUSG00000026360	72	85	94	29	25	22	78	84	94	28	23	23	54.94	85	25	288	-1797	-6.73	1698.75	23045	0	0.0316	0.0256	0.0256	TRUE	0.0811	regulator of G-protein signaling 2 [Source:MGI Symbol;Acc:MGI:1098271]	1	143999338	144004161	-1	Rgs2	19735
ENSMUSG00000026365	363	388	491	97	83	75	393	382	493	93	78	77	252.53	423	83	195	-2358	-15835	1.78057e-42	1.77452e-40	0.0127	8	0.0089	0.0089	TRUE	246	complement component factor h [Source:MGI Symbol;Acc:MGI:88385]	1	140084708	140183764	-1	Cfh	12628
ENSMUSG00000026413	214	258	223	107	119	108	232	254	224	102	111	111	172.32	237	108	457	-1.13	-7704	1.31602	2.36635	0	11	0.0089	0.0089	TRUE	0.0475	plakophilin 1 [Source:MGI Symbol;Acc:MGI:1328359]	1	135871395	135919207	-1	Pkp1	18772
ENSMUSG00000026527	15	13	13	0	0	3	16	13	13	0	0	3	7.53	14	1	0.07	-3838	-3811	0.000138641581662256	0.000726213272822422	0	0.2218	0.1992	0.1992	TRUE	14448	regulator of G protein signaling 7 [Source:MGI Symbol;Acc:MGI:1346089]	1	175059087	175492500	-1	Rgs7	24012
ENSMUSG00000026586	823	914	906	448	432	379	891	900	910	427	404	389	653.55	900	407	452	-1145	-14021	1.15253e-30	8.44894e-29	0	0.0039	3	3	TRUE	0.0225	paired related homeobox 1 [Source:MGI Symbol;Acc:MGI:97712]	1	163245119	163313710	-1	Prrx1	18933
ENSMUSG00000026616	7	3	4	0	0	0	8	3	4	0	0	0	2.42	5	0	37	-4756	-3068	0.00215593590889572	0.00851529319826643	0	0.6857	0.6262	0.6262	TRUE	0.4467	complement receptor 2 [Source:MGI Symbol;Acc:MGI:88489]	1	195136811	195176716	-1	Cr2	12902
ENSMUSG00000026825	528	528	576	323	276	240	571	520	578	308	258	246	413.77	556	271	487	-1037	-9794	1.19103e-08	3.54704e-07	0.0049	0.0054	0.0054	0.0054	TRUE	0.1632	dynamin 1 [Source:MGI Symbol;Acc:MGI:107384]	2	32308471	32353338	-1	Dnm1	13429
ENSMUSG00000026885	65	57	102	29	26	23	70	56	102	28	24	24	50.75	76	25	331	-1597	-5441	5.28757e+06	4.77353e+07	0.0443	0.0341	0.0361	0.0361	TRUE	0.2889	tubulin tyrosine ligase-like family, member 11 [Source:MGI Symbol;Acc:MGI:1921660]	2	35751241	35979913	-1	Ttll11	74410
ENSMUSG00000026923	82	108	107	43	40	32	89	106	107	41	37	33	68.98	101	37	368	-1442	-6189	60608.8	691738	0	0.0255	21	21	TRUE	0.1042	notch 1 [Source:MGI Symbol;Acc:MGI:97363]	2	26457903	26516663	-1	Notch1	18128
ENSMUSG00000026956	809	912	801	392	429	362	876	898	804	374	402	371	620.84	859	382	445	-1168	-13.53	1.03367e-27	6.59472e-26	0	0.0041	0.0035	0.0035	TRUE	0.0378	UDP-N-acteylglucosamine pyrophosphorylase 1-like 1 [Source:MGI Symbol;Acc:MGI:2443318]	2	25359889	25365682	-1	Uap1l1	227620
ENSMUSG00000026958	443	424	397	238	223	201	479	418	399	227	209	206	322.95	432	214	496	-1011	-8824	0.000110504	0.00263688	0.0038	0.0065	6	6	TRUE	0.1055	dipeptidylpeptidase 7 [Source:MGI Symbol;Acc:MGI:1933213]	2	25352276	25356359	-1	Dpp7	83768
ENSMUSG00000027111	94	105	109	12	5	8	102	103	109	11	5	8	56.49	105	8	77	-3696	-10401	2.45305e-11	8.2207e-10	0	0.0308	0.0261	0.0261	TRUE	0.4549	integrin alpha 6 [Source:MGI Symbol;Acc:MGI:96605]	2	71745616	71858416	1	Itga6	16403
ENSMUSG00000027221	590	652	568	352	302	268	639	642	570	336	283	275	457.42	617	298	483	-1049	-10276	9.06893e-12	2.98668e-09	0.0052	5	0.0051	0.0051	TRUE	0.1419	carbohydrate sulfotransferase 1 [Source:MGI Symbol;Acc:MGI:1924219]	2	92599707	92615250	1	Chst1	76969
ENSMUSG00000027254	1210	1347	1331	295	280	300	1310	1327	1336	281	262	308	803.99	1324	284	214	-2224	-26777	5.98172e-144	3.14514e-141	0	0.0035	0.0029	0.0029	TRUE	0.0601	microtubule-associated protein 1 A [Source:MGI Symbol;Acc:MGI:1306776]	2	121289600	121310832	1	Map1a	17754
ENSMUSG00000027330	745	849	724	341	368	317	806	836	727	325	344	325	560.75	790	331	0.42	-1251	-13714	8.35742e-29	5.66373e-27	0	0.0044	0.0039	0.0039	TRUE	0.0581	cell division cycle 25B [Source:MGI Symbol;Acc:MGI:99701]	2	131186949	131198497	1	Cdc25b	12531
ENSMUSG00000027332	183	166	174	78	79	87	198	163	175	74	74	89	128.98	179	79	443	-1175	-6832	83.8526	11612.9	0	0.0143	0.0123	0.0123	TRUE	0.1113	isovaleryl coenzyme A dehydrogenase [Source:MGI Symbol;Acc:MGI:1929242]	2	118861954	118882909	1	Ivd	56357
ENSMUSG00000027375	16	15	9	0	0	0	17	15	9	0	0	0	6.85	14	0	13	-6259	-4738	2.15809e+08	1.54854e+09	0	0.2435	0.2204	0.2204	TRUE	0.2097	myelin and lymphocyte protein, T cell differentiation protein [Source:MGI Symbol;Acc:MGI:892970]	2	127633226	127656695	-1	Mal	17153
ENSMUSG00000027500	38	49	39	0	0	0	41	48	39	0	0	0	21.42	43	0	4	-7906	-6.46	10486.2	129994	0	0.0788	0.0677	0.0677	TRUE	96	stathmin-like 2 [Source:MGI Symbol;Acc:MGI:98241]	3	8509360	8561606	1	Stmn2	20257
ENSMUSG00000027580	87	110	129	10	10	9	94	108	130	10	9	9	60.02	111	9	85	-3562	-10524	6.72261e-12	2.335e-10	0	29	0.0262	0.0262	TRUE	0.1021	helicase with zinc finger 2, transcriptional coactivator [Source:MGI Symbol;Acc:MGI:2385169]	2	181227615	181242027	-1	Helz2	229003
ENSMUSG00000027827	168	133	184	34	30	35	182	131	185	32	28	36	99	166	32	194	-2369	-10496	9.0291e-12	3.0869e-10	0	0.0182	0.0185	0.0185	TRUE	365	potassium voltage-gated channel, shaker-related subfamily, beta member 1 [Source:MGI Symbol;Acc:MGI:109155]	3	64949196	65378223	1	Kcnab1	16497
ENSMUSG00000027843	52	69	71	6	2	4	56	68	71	6	2	4	34.54	65	4	0.06	-4.07	-8242	0.0169341	0.352748	0	0.0494	0.0429	0.0429	TRUE	0.3815	protein tyrosine phosphatase, non-receptor type 22 (lymphoid) [Source:MGI Symbol;Acc:MGI:107170]	3	103859795	103912247	1	Ptpn22	19260
ENSMUSG00000027931	29	41	45	13	11	8	31	40	45	12	10	8	24.64	39	10	265	-1918	-4746	2.07373e+07	1.49364e+09	0	0.0687	0.0576	0.0576	TRUE	0.2055	natriuretic peptide receptor 1 [Source:MGI Symbol;Acc:MGI:97371]	3	90450591	90465866	-1	Npr1	18160
ENSMUSG00000027977	49	42	50	16	21	18	53	41	50	15	20	18	33	48	18	0.37	-1436	-4.32	1.56376e+09	9.71248e+09	0	0.0517	0.0417	0.0417	TRUE	0.1262	N-deacetylase/N-sulfotransferase (heparan glucosaminyl) 3 [Source:MGI Symbol;Acc:MGI:1932544]	3	123526166	123690853	-1	Ndst3	83398
ENSMUSG00000027994	48	51	61	15	17	18	52	50	61	14	16	18	35.35	54	16	297	-1.75	-5313	1.07737e+07	9.37655e+07	0	0.0483	0.0388	0.0388	TRUE	0.0999	mitochondrial calcium uniporter dominant negative beta subunit [Source:MGI Symbol;Acc:MGI:1914065]	3	129914960	129970206	-1	Mcub	66815
ENSMUSG00000028358	70	75	85	13	19	6	76	74	85	12	18	6	45.22	78	12	156	-2678	-7975	0.0151803	2.94891	0	0.0381	0.0351	0.0351	TRUE	0.6955	zinc finger protein 618 [Source:MGI Symbol;Acc:MGI:1919950]	4	62965573	63139708	1	Zfp618	72701
ENSMUSG00000028378	225	268	267	83	85	72	244	264	268	79	80	74	168.03	259	78	0.3	-1737	-11257	2.14003e-15	8.77184e-14	0	0.0113	0.0089	0.0089	TRUE	28	prostaglandin reductase 1 [Source:MGI Symbol;Acc:MGI:1914353]	4	58965439	58987119	-1	Ptgr1	67103
ENSMUSG00000028393	787	888	833	397	406	408	852	875	836	379	380	419	623.36	854	393	459	-1123	-13365	9.7229e-27	5.97802e-25	0	0.0041	0.0033	0.0033	TRUE	0.0381	aminolevulinate, delta-, dehydratase [Source:MGI Symbol;Acc:MGI:96853]	4	62509169	62519918	-1	Alad	17025
ENSMUSG00000028399	167	205	218	38	51	38	181	202	219	36	48	39	120.75	201	41	205	-2289	-11.68	1.60861e-17	7.1096e-16	0	0.0151	0.0133	0.0133	TRUE	166	protein tyrosine phosphatase, receptor type, D [Source:MGI Symbol;Acc:MGI:97812]	4	75941238	78211961	-1	Ptprd	19266
ENSMUSG00000028412	1700	1863	1736	933	970	740	1840	1835	1743	890	908	759	1329.21	1806	852	473	-1081	-15046	3.66742e-37	3.23242e-35	0.0037	0.0027	0.0029	0.0029	TRUE	107	solute carrier family 44, member 1 [Source:MGI Symbol;Acc:MGI:2140592]	4	53440413	53622478	1	Slc44a1	100434
ENSMUSG00000028434	116	112	129	6	9	7	126	110	130	6	8	7	64.45	122	7	58	-4096	-11264	1.97245e-15	8.10673e-14	0	0.0271	0.0229	0.0229	TRUE	0.0849	erythrocyte membrane protein band 4.1 like 4b [Source:MGI Symbol;Acc:MGI:1859149]	4	56991972	57143437	-1	Epb41l4b	54357
ENSMUSG00000028514	3277	3697	3866	1317	1370	1250	3547	3641	3881	1257	1283	1283	2481.83	3690	1274	345	-1534	-27169	1.51147e-148	8.86422e-146	1	0.0021	0.0018	0.0018	TRUE	0.0251	ubiquitin specific peptidase 24 [Source:MGI Symbol;Acc:MGI:1919936]	4	106316213	106441322	1	Usp24	329908
ENSMUSG00000028517	226	288	291	74	79	62	245	284	292	71	74	64	171.43	274	70	254	-1978	-12348	4.96459e-21	2.49013e-19	0	0.0111	0.0096	0.0096	TRUE	0.0933	phospholipid phosphatase 3 [Source:MGI Symbol;Acc:MGI:1915166]	4	105157347	105232764	1	Plpp3	67916
ENSMUSG00000028518	151	155	176	45	54	37	163	153	177	43	51	38	104.04	164	44	267	-1903	-9524	1.66398e-07	4.64695e-06	0	0.0174	0.0146	0.0146	TRUE	0.1453	protein kinase, AMP-activated, alpha 2 catalytic subunit [Source:MGI Symbol;Acc:MGI:1336173]	4	105029874	105109890	-1	Prkaa2	108079
ENSMUSG00000028521	428	476	468	189	214	180	463	469	470	180	200	185	327.88	467	188	403	-1.31	-11.94	7.3453e-19	3.37353e-17	0	0.0065	5	5	TRUE	0.0339	solute carrier family 35 (UDP-glucuronic acid/UDP-N-acetylgalactosamine dual transporter), member D1 [Source:MGI Symbol;Acc:MGI:2140361]	4	103170649	103215164	-1	Slc35d1	242585
ENSMUSG00000028522	1321	1407	1514	562	628	483	1430	1386	1520	536	588	496	992.54	1445	540	374	-1419	-18329	4.85818e-61	7.96533e-59	0.0029	0.0031	0.0031	0.0031	TRUE	0.0712	MEIR1 treanscription regulator [Source:MGI Symbol;Acc:MGI:1918398]	4	103114390	103165754	1	Mier1	71148
ENSMUSG00000028527	765	858	750	207	209	223	828	845	753	198	196	229	507.99	809	208	256	-1966	-19.54	5.05396e-71	1.01398e-68	0.0026	0.0047	0.0043	0.0043	TRUE	0.0873	adenylate kinase 4 [Source:MGI Symbol;Acc:MGI:87979]	4	101419277	101466995	1	Ak4	11639
ENSMUSG00000028530	2306	2617	2479	1241	1270	1137	2496	2577	2489	1184	1189	1167	1850.3	2521	1180	468	-1095	-19471	1.92729e-70	3.7676e-68	0	0.0023	0.0017	0.0017	TRUE	0.0047	Janus kinase 1 [Source:MGI Symbol;Acc:MGI:96628]	4	101152367	101265282	-1	Jak1	16451
ENSMUSG00000028549	47	56	53	21	23	33	51	55	53	20	22	34	39.11	53	25	471	-1085	-3564	0.00036458962576579	0.00174216941826285	0	0.0438	0.0378	0.0378	TRUE	0.5459	integrin beta 3 binding protein (beta3-endonexin) [Source:MGI Symbol;Acc:MGI:1914983]	4	99765402	99929813	-1	Itgb3bp	67733
ENSMUSG00000028550	255	257	294	112	127	116	276	253	295	107	119	119	194.84	275	115	418	-1258	-8.91	5.12113e-05	0.00124939	0	0.0099	0.0083	0.0083	TRUE	0.0544	autophagy related 4C, cysteine peptidase [Source:MGI Symbol;Acc:MGI:2651854]	4	99193934	99259787	1	Atg4c	242557
ENSMUSG00000028560	2290	2313	2249	829	876	885	2478	2278	2258	791	820	908	1588.93	2338	840	359	-1478	-21671	3.87446e-90	1.09403e-87	0.0028	0.0025	0.0026	0.0026	TRUE	0.0593	ubiquitin specific peptidase 1 [Source:MGI Symbol;Acc:MGI:2385198]	4	98923810	98935543	1	Usp1	230484
ENSMUSG00000028563	168	164	184	110	87	75	182	162	185	105	81	77	131.91	176	88	0.5	-1001	-5846	502780	5.17301e+06	0.0053	14	0.0127	0.0127	TRUE	0.2829	TM2 domain containing 1 [Source:MGI Symbol;Acc:MGI:2137022]	4	98355370	98383306	-1	Tm2d1	94043
ENSMUSG00000028565	821	946	1051	384	370	302	889	932	1055	366	346	310	649.68	959	341	356	-1491	-15946	3.04061e-43	3.09088e-41	0.0058	4	0.0043	0.0043	TRUE	93	nuclear factor I/A [Source:MGI Symbol;Acc:MGI:108056]	4	97772734	98118874	1	Nfia	18027
ENSMUSG00000028576	910	904	960	346	392	388	985	890	964	330	367	398	655.71	946	365	386	-1375	-15.49	4.0247e-40	3.83554e-38	0.0032	0.0039	0.0038	0.0038	TRUE	0.0804	intraflagellar transport 74 [Source:MGI Symbol;Acc:MGI:1914944]	4	94614491	94693229	1	Ift74	67694
ENSMUSG00000028577	2609	2710	2684	1247	1265	1265	2824	2669	2695	1190	1184	1298	1976.59	2729	1224	448	-1157	-19.46	2.40231e-70	4.63677e-68	0.0009	0.0022	2	2	TRUE	33	phospholipase A2, activating protein [Source:MGI Symbol;Acc:MGI:104810]	4	94567514	94603244	-1	Plaa	18786
ENSMUSG00000028578	312	330	336	159	166	122	338	325	337	152	155	125	238.72	333	144	433	-1207	-9384	6.37046e-07	1.71924e-05	0	0.0084	7	7	TRUE	0.1331	caspase activity and apoptosis inhibitor 1 [Source:MGI Symbol;Acc:MGI:1915020]	4	94500081	94556796	-1	Caap1	67770
ENSMUSG00000028587	605	631	710	130	129	114	655	621	713	124	121	117	391.81	663	121	182	-2458	-21164	2.06022e-85	5.51126e-83	0	0.0056	0.0049	0.0049	TRUE	0.0515	origin recognition complex, subunit 1 [Source:MGI Symbol;Acc:MGI:1328337]	4	108579423	108614833	1	Orc1	18392
ENSMUSG00000028599	964	1126	1086	497	486	380	1043	1109	1090	474	455	390	760.29	1081	440	407	-1296	-15494	3.7995e-40	3.6437e-38	0.0031	0.0036	0.0035	0.0035	TRUE	0.1108	tumor necrosis factor receptor superfamily, member 1b [Source:MGI Symbol;Acc:MGI:1314883]	4	145213463	145246870	-1	Tnfrsf1b	21938
ENSMUSG00000028600	39	39	53	15	15	6	42	38	53	14	14	6	28.06	44	11	0.26	-1945	-5009	5.48335e+07	4.31647e+08	0.0156	0.0605	0.0553	0.0553	TRUE	0.6004	podocan [Source:MGI Symbol;Acc:MGI:2674939]	4	108014791	108096445	-1	Podn	242608
ENSMUSG00000028601	284	294	304	143	142	121	307	290	305	136	133	124	215.95	301	131	437	-1195	-9096	9.37389e-06	0.000241441	0	0.0091	7	7	TRUE	0.0218	enoyl Coenzyme A hydratase domain containing 2 [Source:MGI Symbol;Acc:MGI:1289238]	4	108165437	108179308	1	Echdc2	52430
ENSMUSG00000028603	80	96	74	27	33	37	87	95	74	26	31	38	58.34	85	32	369	-1437	-5.61	2.02424e+06	1.9219e+07	0	0.0298	0.0258	0.0258	TRUE	0.2085	sterol carrier protein 2, liver [Source:MGI Symbol;Acc:MGI:98254]	4	108043839	108144998	-1	Scp2	20280
ENSMUSG00000028613	823	1002	968	436	463	445	891	987	972	416	433	457	692.58	950	435	458	-1127	-13629	2.68765e-28	1.75885e-27	0.0012	0.0038	0.0033	0.0033	TRUE	0.0347	low density lipoprotein receptor-related protein 8, apolipoprotein e receptor [Source:MGI Symbol;Acc:MGI:1340044]	4	107801869	107876840	1	Lrp8	16975
ENSMUSG00000028614	1612	1891	1792	849	878	736	1745	1862	1799	810	822	755	1298.91	1802	796	442	-1179	-17941	5.66817e-58	8.81921e-56	0.0006	0.0027	0.0022	0.0022	TRUE	0.0231	NDC1 transmembrane nucleoporin [Source:MGI Symbol;Acc:MGI:1920037]	4	107367784	107416346	1	Ndc1	72787
ENSMUSG00000028619	316	319	304	138	148	129	342	314	305	132	139	132	227.33	320	134	419	-1255	-9664	4.28863e-08	1.24085e-07	0	0.0087	0.0069	0.0069	TRUE	0.0384	transcription elongation factor A (SII) N-terminal and central domain containing 2 [Source:MGI Symbol;Acc:MGI:1913776]	4	107134155	107179116	-1	Tceanc2	66526
ENSMUSG00000028621	115	157	152	61	63	47	124	155	153	58	59	48	99.52	144	55	383	-1383	-7016	227.936	3374.34	0	0.0181	0.0157	0.0157	TRUE	0.1411	cytochrome b5 reductase-like [Source:MGI Symbol;Acc:MGI:1919657]	4	107066988	107088268	1	Cyb5rl	230582
ENSMUSG00000028622	622	638	636	278	317	246	673	628	639	265	297	252	459.09	647	271	0.42	-1.25	-12807	1.50203e-24	8.29818e-22	0.0005	5	0.0043	0.0043	TRUE	0.0755	mitochondrial ribosomal protein L37 [Source:MGI Symbol;Acc:MGI:1926268]	4	107055874	107066868	-1	Mrpl37	56280
ENSMUSG00000028755	237	242	225	126	117	96	257	238	226	120	110	99	174.83	240	110	456	-1132	-7674	1.66362	29.5651	0	0.0109	0.0091	0.0091	TRUE	0.0744	cytidine deaminase [Source:MGI Symbol;Acc:MGI:1919519]	4	138338424	138367992	-1	Cda	72269
ENSMUSG00000028776	740	832	755	225	199	183	801	819	758	215	186	188	494.51	793	196	248	-2014	-20191	1.18175e-76	2.64991e-74	0	0.0048	4	4	TRUE	0.0746	tubulointerstitial nephritis antigen-like 1 [Source:MGI Symbol;Acc:MGI:2137617]	4	130164454	130175122	-1	Tinagl1	94242
ENSMUSG00000028927	29	43	40	6	5	4	31	42	40	6	5	4	21.4	38	5	128	-2971	-5964	246064	2.6256e+06	0	0.0789	0.0653	0.0653	TRUE	0.1613	peptidyl arginine deiminase, type II [Source:MGI Symbol;Acc:MGI:1338892]	4	140906344	140952586	1	Padi2	18600
ENSMUSG00000028972	27	32	39	7	10	8	29	32	39	7	9	8	20.69	33	8	243	-2043	-4609	4.04846e+08	2.77692e+08	0	0.0816	0.0662	0.0662	TRUE	0.1655	carbonic anhydrase 6 [Source:MGI Symbol;Acc:MGI:1333786]	4	150187015	150201332	-1	Car6	12353
ENSMUSG00000029212	30	31	40	13	12	14	32	31	40	12	11	14	23.53	34	12	367	-1444	-3683	0.000230600133775093	0.00115133950222745	0	0.0719	0.0575	0.0575	TRUE	0.1542	gamma-aminobutyric acid (GABA) A receptor, subunit beta 1 [Source:MGI Symbol;Acc:MGI:95619]	5	71658113	72149037	1	Gabrb1	14400
ENSMUSG00000029304	4349	4587	4564	1904	1958	1776	4707	4518	4582	1817	1833	1822	3213.13	4602	1824	396	-1335	-27067	2.41557e-148	1.31545e-145	0	0.0019	0.0014	0.0014	TRUE	0.0048	secreted phosphoprotein 1 [Source:MGI Symbol;Acc:MGI:98389]	5	104435118	104441050	1	Spp1	20750
ENSMUSG00000029307	7	11	6	0	1	0	8	11	6	0	1	0	4.23	8	0	43	-4.55	-3265	0.00109582963852338	0.00467390498691033	0	0.3938	0.3372	0.3372	TRUE	0.3923	dentin matrix protein 1 [Source:MGI Symbol;Acc:MGI:94910]	5	104202613	104214102	1	Dmp1	13406
ENSMUSG00000029468	88	88	83	13	14	20	95	87	83	12	13	21	51.88	88	15	173	-2535	-8383	0.00516647	0.11222	0	0.0334	0.0283	0.0283	TRUE	0.3876	purinergic receptor P2X, ligand-gated ion channel, 7 [Source:MGI Symbol;Acc:MGI:1339957]	5	122643911	122691432	1	P2rx7	18439
ENSMUSG00000029563	10	20	16	1	4	3	11	20	16	1	4	3	9.06	16	3	166	-2588	-3562	0.000368238290298927	0.00175740139295087	0	0.1845	0.1601	0.1601	TRUE	0.2615	forkhead box P2 [Source:MGI Symbol;Acc:MGI:2148705]	6	14901349	15441977	1	Foxp2	114142
ENSMUSG00000029821	42	47	52	11	16	13	45	46	52	10	15	13	30.46	48	13	0.27	-1891	-5271	1.35478e+07	1.16513e+08	0	0.0559	0.0446	0.0446	TRUE	0.1202	gasdermin E [Source:MGI Symbol;Acc:MGI:1889850]	6	50188888	50263862	-1	Gsdme	54722
ENSMUSG00000030020	189	198	254	106	105	92	205	195	255	101	98	94	158.07	218	98	449	-1155	-7217	53.0136	835.937	0.0082	0.0119	0.0112	0.0112	TRUE	0.2413	prickle planar cell polarity protein 2 [Source:MGI Symbol;Acc:MGI:1925144]	6	92370908	92706155	-1	Prickle2	243548
ENSMUSG00000030110	224	219	207	3	5	2	242	216	208	3	5	2	112.59	222	3	15	-6.1	-12688	6.87348e-23	3.6518e-22	0	0.0161	0.0142	0.0142	TRUE	0.2444	ret proto-oncogene [Source:MGI Symbol;Acc:MGI:97902]	6	118151745	118197718	-1	Ret	19713
ENSMUSG00000030123	243	320	235	138	158	97	263	315	236	132	148	100	198.87	271	127	467	-1.1	-6989	277.015	4057.57	0.0238	0.0097	0.0121	0.0121	TRUE	0.3431	plexin D1 [Source:MGI Symbol;Acc:MGI:2154244]	6	115954811	115995005	-1	Plxnd1	67784
ENSMUSG00000030218	37	47	42	31	14	19	40	46	42	30	13	19	31.78	43	21	483	-1049	-3046	0.00232137868066714	0.00908298232558699	0.0251	0.0536	0.0501	0.0501	TRUE	0.7192	matrix Gla protein [Source:MGI Symbol;Acc:MGI:96976]	6	136872435	136875823	-1	Mgp	17313
ENSMUSG00000030322	106	138	118	52	73	47	115	136	118	50	68	48	89.21	123	55	451	-1149	-5542	299697	2.78985e+07	0.0066	0.02	0.0181	0.0181	TRUE	0.3645	methyl-CpG binding domain protein 4 [Source:MGI Symbol;Acc:MGI:1333850]	6	115840697	115853371	-1	Mbd4	17193
ENSMUSG00000030353	672	686	702	204	234	205	727	676	705	195	219	210	455.3	703	208	296	-1755	-17604	2.28031e-55	3.18992e-53	0	0.0051	0.0041	0.0041	TRUE	0.0354	TEA domain family member 4 [Source:MGI Symbol;Acc:MGI:106907]	6	128224288	128300823	-1	Tead4	21679
ENSMUSG00000030409	374	463	452	180	184	151	405	456	454	172	172	155	302.25	438	166	0.38	-1397	-11921	9.14853e-19	4.18909e-18	0	0.0069	0.0058	0.0058	TRUE	0.0504	dystrophia myotonica-protein kinase [Source:MGI Symbol;Acc:MGI:94906]	7	19083849	19093821	1	Dmpk	13400
ENSMUSG00000030522	438	505	498	185	211	160	474	497	500	177	198	164	334.94	490	180	366	-1449	-12934	2.89107e-24	1.6327e-22	0	0.0064	0.0053	0.0053	TRUE	0.0852	myotubularin related protein 10 [Source:MGI Symbol;Acc:MGI:2142292]	7	64287653	64340806	1	Mtmr10	233315
ENSMUSG00000030539	431	466	433	230	221	183	466	459	435	219	207	188	329.05	453	205	452	-1145	-10371	3.37224e-11	1.12516e-09	0	0.0064	0.0053	0.0053	TRUE	0.0553	sema domain, immunoglobulin domain (Ig), transmembrane domain (TM) and short cytoplasmic domain, (semaphorin) 4B [Source:MGI Symbol;Acc:MGI:107559]	7	80186841	80226527	1	Sema4b	20352
ENSMUSG00000030905	6	9	12	0	0	0	6	9	12	0	0	0	4.57	9	0	0.02	-5679	-4104	4.05659e+09	0.000233954375138909	0	0.3646	0.3237	0.3237	TRUE	0.0862	crystallin, mu [Source:MGI Symbol;Acc:MGI:102675]	7	120186380	120202111	-1	Crym	12971
ENSMUSG00000031075	31	48	49	17	11	14	34	47	49	16	10	14	28.48	43	13	313	-1674	-4513	6.40356e+08	4.25824e+09	0	0.0597	0.0517	0.0517	TRUE	0.2881	anoctamin 1, calcium activated chloride channel [Source:MGI Symbol;Acc:MGI:2142149]	7	144588549	144751974	-1	Ano1	101772
ENSMUSG00000031098	64	82	85	24	24	22	69	81	85	23	22	23	50.55	78	23	288	-1794	-6472	9654.16	120267	0	0.0342	0.0274	0.0274	TRUE	0.0936	synaptotagmin VIII [Source:MGI Symbol;Acc:MGI:1859867]	7	142434850	142440396	1	Syt8	55925
ENSMUSG00000031292	98	114	144	51	50	37	106	112	145	49	47	38	82.73	121	45	368	-1442	-6537	6259.96	79016.5	0	0.0215	0.0199	0.0199	TRUE	0.2961	cyclin-dependent kinase-like 5 [Source:MGI Symbol;Acc:MGI:1278336]	X	160771923	160994704	-1	Cdkl5	382253
ENSMUSG00000031373	366	379	410	183	215	174	396	373	412	175	201	179	289.24	394	185	0.47	-1.09	-9314	1.2304e-06	3.28566e-05	0	0.0071	0.0059	0.0059	TRUE	0.0672	carbonic anhydrase 5b, mitochondrial [Source:MGI Symbol;Acc:MGI:1926249]	X	163976822	164027997	-1	Car5b	56078
ENSMUSG00000031451	22	31	26	5	7	10	24	31	26	5	7	10	17	27	7	266	-1909	-3939	8.1837e+08	0.000444708087700726	0	99	0.0823	0.0823	TRUE	0.3624	growth arrest specific 6 [Source:MGI Symbol;Acc:MGI:95660]	8	13465374	13494490	-1	Gas6	14456
ENSMUSG00000031530	202	212	196	69	76	56	219	209	197	66	71	57	136.44	208	65	312	-1679	-9839	7.67199e-09	2.31648e-07	0	0.0136	0.0111	0.0111	TRUE	0.0837	dual specificity phosphatase 4 [Source:MGI Symbol;Acc:MGI:2442191]	8	34807297	34819894	1	Dusp4	319520
ENSMUSG00000031549	23	22	31	1	3	3	25	22	31	1	3	3	14.09	26	2	88	-3513	-5153	2.56017e+07	2.11356e+08	0	0.1192	0.1011	0.1011	TRUE	0.2808	indoleamine 2,3-dioxygenase 2 [Source:MGI Symbol;Acc:MGI:2142489]	8	24531892	24576333	-1	Ido2	209176
ENSMUSG00000031558	465	615	670	236	291	212	503	606	673	225	272	218	416.13	594	238	402	-1316	-11016	3.1869e-14	1.26218e-12	0.0157	0.0054	0.0074	0.0074	TRUE	0.1647	slit guidance ligand 2 [Source:MGI Symbol;Acc:MGI:1315205]	5	47983138	48307733	1	Slit2	20563
ENSMUSG00000031596	716	801	862	372	378	323	775	789	865	355	354	331	578.25	810	347	428	-1223	-13785	3.15935e-31	2.16026e-27	0	0.0043	0.0036	0.0036	TRUE	0.0431	solute carrier family 7 (cationic amino acid transporter, y+ system), member 2 [Source:MGI Symbol;Acc:MGI:99828]	8	40862396	40922308	1	Slc7a2	11988
ENSMUSG00000031618	30	49	58	15	21	18	32	48	58	14	20	18	31.9	46	17	376	-1.41	-4017	5.88297e+09	0.00032822369043509	0	0.0534	0.0499	0.0499	TRUE	0.1711	nuclear receptor subfamily 3, group C, member 2 [Source:MGI Symbol;Acc:MGI:99459]	8	76899442	77245012	1	Nr3c2	110784
ENSMUSG00000031712	18	17	38	4	7	4	19	17	38	4	7	4	14.81	25	5	195	-2357	-4136	3.52657e+09	0.000205948494901288	0	0.1134	0.1131	0.1131	TRUE	13601	interleukin 15 [Source:MGI Symbol;Acc:MGI:103014]	8	82331632	82403222	-1	Il15	16168
ENSMUSG00000031762	672	747	694	133	146	102	727	736	697	127	137	105	421.33	720	123	171	-2548	-22366	8.40586e-97	2.67026e-94	0	0.0053	0.0047	0.0047	TRUE	0.1622	metallothionein 2 [Source:MGI Symbol;Acc:MGI:97172]	8	94172664	94173568	1	Mt2	17750
ENSMUSG00000031765	1050	1120	1066	354	374	358	1136	1103	1070	338	350	367	727.49	1103	352	319	-1.65	-20296	1.40232e-77	3.19142e-75	0	0.0037	0.0029	0.0029	TRUE	0.0167	metallothionein 1 [Source:MGI Symbol;Acc:MGI:97171]	8	94179082	94180327	1	Mt1	17748
ENSMUSG00000031841	663	783	1016	322	382	296	718	771	1020	307	358	304	579.56	836	323	386	-1373	-11712	1.10111e-17	4.93818e-16	0.0198	0.0043	0.0078	0.0078	TRUE	0.4399	cadherin 13 [Source:MGI Symbol;Acc:MGI:99551]	8	118283733	119324921	1	Cdh13	12554
ENSMUSG00000031860	29	37	26	11	5	8	31	36	26	10	5	8	19.55	31	8	248	-2.01	-4365	1.27001e+09	7.97573e+09	0	0.0863	74	74	TRUE	303	pre B cell leukemia homeobox 4 [Source:MGI Symbol;Acc:MGI:1931321]	8	69832491	69872292	1	Pbx4	80720
ENSMUSG00000031877	112	120	142	46	60	46	121	118	143	44	56	47	88.2	127	49	386	-1374	-6614	3739.3	48483.7	0	0.0202	0.0172	0.0172	TRUE	0.1353	carboxylesterase 2G [Source:MGI Symbol;Acc:MGI:1919611]	8	104961718	104969537	1	Ces2g	72361
ENSMUSG00000032024	53	69	85	23	36	31	57	68	85	22	34	32	49.69	70	29	414	-1271	-4.53	5.89521e+08	3.94601e+09	0.0223	0.0348	0.0328	0.0328	TRUE	0.2206	CXADR-like membrane protein [Source:MGI Symbol;Acc:MGI:1918816]	9	40685962	40785319	1	Clmp	71566
ENSMUSG00000032174	29	32	27	11	11	7	31	32	27	10	10	7	19.66	30	9	312	-1.68	-3858	0.000114525959051803	0.00060782868904347	0	0.0858	0.0678	0.0678	TRUE	127	intercellular adhesion molecule 5, telencephalin [Source:MGI Symbol;Acc:MGI:109430]	9	21032073	21039036	1	Icam5	15898
ENSMUSG00000032175	634	684	690	245	252	252	686	674	693	234	236	259	463.47	684	243	355	-1496	-15589	8.68526e-41	8.43521e-40	0	5	0.0039	0.0039	TRUE	0.0351	tyrosine kinase 2 [Source:MGI Symbol;Acc:MGI:1929470]	9	21104068	21131243	-1	Tyk2	54721
ENSMUSG00000032226	49	50	48	12	12	8	53	49	48	11	11	8	30.23	50	10	206	-2278	-6.06	136336	1.49881e+06	0	0.0563	0.0447	0.0447	TRUE	0.1059	glucosaminyl (N-acetyl) transferase 3, mucin type [Source:MGI Symbol;Acc:MGI:1919327]	9	70031496	70038088	-1	Gcnt3	72077
ENSMUSG00000032251	38	41	50	10	16	6	41	40	50	10	15	6	27.06	44	10	235	-2091	-5252	1.50768e+06	1.28719e+08	0	0.0627	0.0555	0.0555	TRUE	0.6168	interleukin-1 receptor-associated kinase 1 binding protein 1 [Source:MGI Symbol;Acc:MGI:1929475]	9	82829540	82847687	1	Irak1bp1	65099
ENSMUSG00000032344	79	77	78	6	7	4	86	76	78	6	7	4	42.67	80	6	69	-3861	-9168	4.83286e-06	0.000125539	0	0.0403	0.0331	0.0331	TRUE	0.0965	cyclic GMP-AMP synthase [Source:MGI Symbol;Acc:MGI:2442261]	9	78430526	78443237	-1	Cgas	214763
ENSMUSG00000032549	257	258	237	42	46	42	278	254	238	40	43	43	149.4	257	42	164	-2609	-14296	2.31019e-32	1.77908e-30	0	0.0125	0.0105	0.0105	TRUE	0.0581	RAB6B, member RAS oncogene family [Source:MGI Symbol;Acc:MGI:107283]	9	103111787	103185276	1	Rab6b	270192
ENSMUSG00000032577	76	97	103	42	53	45	82	96	103	40	50	46	69.51	94	45	483	-1051	-4.63	3.65217e+08	2.52784e+09	0	0.0253	0.0209	0.0209	TRUE	0.1066	mitogen-activated protein kinase-activated protein kinase 3 [Source:MGI Symbol;Acc:MGI:2143163]	9	107254927	107289877	-1	Mapkapk3	102626
ENSMUSG00000032652	119	116	132	56	60	59	129	114	133	53	56	61	90.95	125	57	453	-1143	-5768	804118	8.06127e+06	0	0.0196	0.0156	0.0156	TRUE	0.0609	cAMP responsive element binding protein-like 2 [Source:MGI Symbol;Acc:MGI:1889385]	6	134830154	134858931	1	Crebl2	232430
ENSMUSG00000032769	6	14	17	0	0	1	6	14	17	0	0	1	6.4	12	0	28	-5165	-3868	0.000109842815967709	0.000584397507981727	0	0.2608	0.2444	0.2444	TRUE	0.4277	transient receptor potential cation channel, subfamily A, member 1 [Source:MGI Symbol;Acc:MGI:3522699]	1	14872648	14918862	-1	Trpa1	277328
ENSMUSG00000032878	70	71	74	16	16	21	76	70	74	15	15	22	45.3	73	17	234	-2092	-6914	472.073	6727.26	0	38	0.0308	0.0308	TRUE	0.2254	coiled-coil domain containing 85A [Source:MGI Symbol;Acc:MGI:2445069]	11	28385685	28584324	-1	Ccdc85a	216613
ENSMUSG00000032911	7	11	10	0	1	0	8	11	10	0	1	0	4.9	10	0	37	-4.77	-3499	0.000467145996467379	0.00217033581783504	0	0.3402	0.2858	0.2858	TRUE	0.3923	chondroitin sulfate proteoglycan 4 [Source:MGI Symbol;Acc:MGI:2153093]	9	56865033	56899870	1	Cspg4	121021
ENSMUSG00000032925	83	104	128	61	53	36	90	102	129	58	50	37	77.59	107	48	452	-1146	-4985	6.20622e+07	4.83806e+08	0.0256	0.0228	0.0232	0.0232	TRUE	0.3213	integrin, beta-like 1 [Source:MGI Symbol;Acc:MGI:2443439]	14	123659971	123975618	1	Itgbl1	223272
ENSMUSG00000033066	93	108	107	11	10	6	101	106	107	10	9	6	56.74	105	8	83	-3587	-10407	2.30466e-11	7.7404e-10	0	0.0306	0.0251	0.0251	TRUE	0.1885	growth arrest specific 7 [Source:MGI Symbol;Acc:MGI:1202388]	11	67455091	67688990	1	Gas7	14457
ENSMUSG00000033088	942	1012	944	426	387	375	1020	997	948	406	362	385	686.26	988	384	389	-1361	-16403	1.81649e-46	2.0366e-44	0	0.0038	0.0032	0.0032	TRUE	0.0304	TRIO and F-actin binding protein [Source:MGI Symbol;Acc:MGI:1349410]	15	78947724	79005869	1	Triobp	110253
ENSMUSG00000034413	173	220	216	64	58	55	187	217	217	61	54	56	132.09	207	57	277	-1854	-10498	8.78305e-12	3.00953e-11	0	14	0.0115	0.0115	TRUE	0.0736	neuralized E3 ubiquitin protein ligase 1B [Source:MGI Symbol;Acc:MGI:3643092]	17	26414829	26446349	1	Neurl1b	240055
ENSMUSG00000034636	1455	1668	1587	779	812	693	1575	1643	1593	743	760	711	1170.9	1604	738	0.46	-1119	-16943	2.16466e-51	2.77367e-48	0	0.0028	0.0022	0.0022	TRUE	12	zyg-ll family member B, cell cycle regulator [Source:MGI Symbol;Acc:MGI:2685277]	4	108229724	108301096	-1	Zyg11b	414872
ENSMUSG00000034845	33	46	56	21	24	14	36	45	56	20	22	14	32.35	46	19	415	-1268	-3717	0.000201244513845366	0.0010221773308175	0	0.0527	0.0472	0.0472	TRUE	0.1148	plasmalemma vesicle associated protein [Source:MGI Symbol;Acc:MGI:1890497]	8	71497765	71511752	-1	Plvap	84094
ENSMUSG00000034868	36	34	25	8	12	9	39	33	25	8	11	9	20.94	32	9	289	-1792	-4132	3.60039e+09	0.00021001813530948	0	0.0806	68	68	TRUE	0.1591	myosin, light chain 12B, regulatory [Source:MGI Symbol;Acc:MGI:107494]	17	70973133	70990890	-1	Myl12b	67938
ENSMUSG00000035069	209	215	257	117	114	102	226	212	258	112	107	105	169.83	232	108	464	-1107	-7383	15.5241	254.528	0	0.0112	0.0095	0.0095	TRUE	0.1078	OMA1 zinc metallopeptidase [Source:MGI Symbol;Acc:MGI:1914263]	4	103313812	103371868	1	Oma1	67013
ENSMUSG00000035126	169	164	188	40	34	53	183	162	189	38	32	54	109.59	178	41	232	-2107	-10216	1.6814e-10	5.4433e-09	0.0108	0.0165	16	16	TRUE	0.5501	WD repeat domain 78 [Source:MGI Symbol;Acc:MGI:2385328]	4	103038065	103114555	-1	Wdr78	242584
ENSMUSG00000035275	45	59	55	1	2	4	49	58	55	1	2	4	28.16	54	2	42	-4574	-7.41	12.6141	208.838	0	0.0603	0.0512	0.0512	TRUE	0.4518	ribonucleoprotein, PTB-binding 2 [Source:MGI Symbol;Acc:MGI:2443623]	4	101068983	101152370	1	Raver2	242570
ENSMUSG00000035305	42	56	66	13	25	21	45	55	66	12	23	22	37.37	55	19	343	-1544	-4708	2.505e+08	1.77822e+09	0.0246	0.0458	0.0429	0.0429	TRUE	0.2928	receptor tyrosine kinase-like orphan receptor 1 [Source:MGI Symbol;Acc:MGI:1347520]	4	100095791	100444765	1	Ror1	26563
ENSMUSG00000035314	186	162	186	87	89	73	201	160	187	83	83	75	131.47	183	80	441	-1.18	-6918	458.775	6543.87	0	14	0.0121	0.0121	TRUE	0.1322	glycerophosphodiester phosphodiesterase domain containing 5 [Source:MGI Symbol;Acc:MGI:2686926]	7	99381414	99461877	1	Gdpd5	233552
ENSMUSG00000035547	119	135	126	12	23	24	129	133	127	11	22	25	74.31	130	19	148	-2759	-10.42	2.01354e-11	6.82278e-10	0	0.0237	0.0212	0.0212	TRUE	0.6881	calpain 5 [Source:MGI Symbol;Acc:MGI:1100859]	7	98121559	98178274	-1	Capn5	12337
ENSMUSG00000035640	57	66	70	33	27	29	62	65	70	31	25	30	47.25	66	29	439	-1189	-4368	1.25152e+09	7.8791e+08	0	0.0365	0.0287	0.0287	TRUE	0.0813	calcium channel, voltage-dependent, beta subunit associated regulatory protein [Source:MGI Symbol;Acc:MGI:1354170]	10	80130451	80140835	-1	Cbarp	100503659
ENSMUSG00000035678	39	40	31	13	6	10	42	39	31	12	6	10	23.5	37	9	0.25	-1998	-4743	2.10797e+08	1.51615e+08	0	72	0.0626	0.0626	TRUE	0.4555	tumor necrosis factor (ligand) superfamily, member 9 [Source:MGI Symbol;Acc:MGI:1101058]	17	57105325	57107757	1	Tnfsf9	21950
ENSMUSG00000035735	378	462	504	170	168	151	409	455	506	162	157	155	307.42	457	158	346	-1531	-12.65	1.12114e-22	5.93579e-21	0	0.0068	0.0064	0.0064	TRUE	98	diacylglycerol lipase, alpha [Source:MGI Symbol;Acc:MGI:2677061]	19	10245265	10304877	-1	Dagla	269060
ENSMUSG00000036019	102	122	151	64	75	52	110	120	152	61	70	53	94.46	127	61	484	-1048	-5142	2.72046e+07	2.23741e+08	0.0137	19	18	18	TRUE	0.2832	transmembrane and tetratricopeptide repeat containing 2 [Source:MGI Symbol;Acc:MGI:1914057]	10	105187663	105574451	-1	Tmtc2	278279
ENSMUSG00000036459	181	202	186	94	95	96	196	199	187	90	89	99	143.12	194	93	476	-1071	-6782	1183.93	16249	0	13	0.0101	0.0101	TRUE	0.0314	WT1-interacting protein [Source:MGI Symbol;Acc:MGI:2141920]	7	34109543	34133268	-1	Wtip	101543
ENSMUSG00000037106	23	19	28	2	0	1	25	19	28	2	0	1	12.44	24	1	41	-4.62	-4.91	9.11838e+07	6.93106e+08	0	0.1348	0.1171	0.1171	TRUE	0.3927	fer-1-like 6 (C. elegans) [Source:MGI Symbol;Acc:MGI:3645398]	15	58510048	58665092	1	Fer1l6	631797
ENSMUSG00000037225	42	52	44	16	20	12	45	51	44	15	19	12	31.19	47	15	0.33	-1.6	-4626	3.72514e+08	2.57367e+09	0	0.0546	44	44	TRUE	0.1697	fibroblast growth factor 2 [Source:MGI Symbol;Acc:MGI:95516]	3	37348346	37410108	1	Fgf2	14173
ENSMUSG00000037306	70	83	99	27	35	21	76	82	99	26	33	22	56.16	86	27	313	-1678	-6274	35273.2	415004	0	0.0309	0.0274	0.0274	TRUE	0.2601	mannosidase, alpha, class 1C, member 1 [Source:MGI Symbol;Acc:MGI:2446214]	4	134561690	134704290	-1	Man1c1	230815
ENSMUSG00000037362	97	109	109	13	20	18	105	107	109	12	19	18	61.89	107	16	154	-2.7	-9585	9.21783e-08	2.61252e-06	0	0.0282	23	23	TRUE	243	cellular communication network factor 3 [Source:MGI Symbol;Acc:MGI:109185]	15	54745702	54754039	1	Ccn3	18133
ENSMUSG00000037904	43	53	48	19	16	14	47	52	48	18	15	14	32.4	49	16	323	-1629	-4821	1.42755e+08	1.04751e+09	0	0.0526	0.0412	0.0412	TRUE	0.0797	ankyrin repeat domain 9 [Source:MGI Symbol;Acc:MGI:1921501]	12	110975353	110979040	-1	Ankrd9	74251
ENSMUSG00000037973	7	9	8	0	0	0	8	9	8	0	0	0	4.08	8	0	22	-5514	-3939	8.17113e+09	0.00044418347521291	0	0.4082	0.3491	0.3491	TRUE	71	ITPR interacting domain containing 1 [Source:MGI Symbol;Acc:MGI:2685304]	6	55836895	55978735	1	Itprid1	232016
ENSMUSG00000038024	1258	1490	1411	650	692	564	1362	1467	1417	620	648	579	1015.39	1415	616	435	-1.2	-16613	5.59735e-48	6.61616e-46	0.0009	3	0.0026	0.0026	TRUE	0.0316	DENN/MADD domain containing 4C [Source:MGI Symbol;Acc:MGI:1914769]	4	86748555	86850603	1	Dennd4c	329877
ENSMUSG00000038146	130	154	161	38	47	24	141	152	162	36	44	25	93.15	152	35	232	-2107	-9563	1.1464e-07	3.23112e-06	0.0017	0.0192	0.0178	0.0178	TRUE	0.4543	notch 3 [Source:MGI Symbol;Acc:MGI:99460]	17	32120820	32166852	-1	Notch3	18131
ENSMUSG00000038235	108	113	112	45	58	38	117	111	112	43	54	39	79.48	113	45	401	-1318	-6109	100246	1.11736e+06	0	0.0223	0.0184	0.0184	TRUE	0.2392	F11 receptor [Source:MGI Symbol;Acc:MGI:1321398]	1	171437535	171464603	1	F11r	16456
ENSMUSG00000038515	20	29	15	6	11	3	22	29	15	6	10	3	14.06	22	6	295	-1.76	-3236	0.00121333582728993	0.00512349617682549	0.0808	0.1194	0.1142	0.1142	TRUE	0.2717	GH regulated TBC protein 1 [Source:MGI Symbol;Acc:MGI:1914040]	8	13172022	13200620	-1	Grtp1	66790
ENSMUSG00000038544	421	433	394	230	215	205	456	426	396	219	201	210	318.13	426	210	494	-1017	-9071	1.17701e-05	0.000301125	0	0.0066	0.0055	0.0055	TRUE	0.0448	INTS3 and NABP interacting protein [Source:MGI Symbol;Acc:MGI:1913459]	4	59769637	59801589	-1	Inip	66209
ENSMUSG00000038618	58	53	38	8	16	26	63	52	38	8	15	27	33.74	51	17	0.32	-1644	-4396	1.10475e+06	7.03055e+07	137	0.0506	61	61	TRUE	0.6152	Ras association (RalGDS/AF-6) domain family (N-terminal) member 7 [Source:MGI Symbol;Acc:MGI:1914235]	7	141215860	141218658	1	Rassf7	66985
ENSMUSG00000038677	183	233	204	108	118	88	198	229	205	103	110	90	156.03	211	101	481	-1056	-6793	1099.92	15136.9	0	12	0.0102	0.0102	TRUE	0.0855	signal peptide, CUB domain, EGF-like 3 [Source:MGI Symbol;Acc:MGI:3045253]	17	28142141	28174854	1	Scube3	268935
ENSMUSG00000038732	209	255	267	89	104	106	226	251	268	85	97	109	172.74	248	97	0.39	-1.36	-8887	6.25723e-05	0.00151445	0.0032	11	0.0098	0.0098	TRUE	0.1165	membrane bound O-acyltransferase domain containing 1 [Source:MGI Symbol;Acc:MGI:2387184]	13	30136489	30246717	1	Mboat1	218121
ENSMUSG00000038742	225	241	243	52	47	43	244	237	244	50	44	44	143.76	242	46	0.19	-2395	-13451	3.02087e-27	1.88779e-25	0	0.0129	0.0102	0.0102	TRUE	0.0407	angiopoietin-like 6 [Source:MGI Symbol;Acc:MGI:1917976]	9	20873808	20879727	-1	Angptl6	70726
ENSMUSG00000038764	349	406	476	55	71	58	378	400	478	52	66	60	238.99	419	59	142	-2815	-17784	9.35776e-57	1.37199e-54	0.0101	0.0083	0.0087	0.0087	TRUE	0.1783	protein tyrosine phosphatase, non-receptor type 3 [Source:MGI Symbol;Acc:MGI:105307]	4	57190841	57301837	-1	Ptpn3	545622
ENSMUSG00000038963	46	67	55	21	25	24	50	66	55	20	23	25	39.84	57	23	397	-1332	-4416	1.00647e+09	6.44008e+09	0	43	0.0352	0.0352	TRUE	0.1636	solute carrier organic anion transporter family, member 4a1 [Source:MGI Symbol;Acc:MGI:1351866]	2	180456245	180474867	1	Slco4a1	108115
ENSMUSG00000039004	86	102	108	8	9	4	93	100	108	8	8	4	53.69	100	7	67	-3892	-10248	1.20347e-10	3.93788e-09	0	0.0323	0.0273	0.0273	TRUE	0.2789	bone morphogenetic protein 6 [Source:MGI Symbol;Acc:MGI:88182]	13	38345107	38500302	1	Bmp6	12161
ENSMUSG00000039031	302	315	321	90	132	113	327	310	322	86	124	116	214.13	320	109	339	-1.56	-10882	1.41142e-13	5.36693e-12	0.0049	0.0092	0.0087	0.0087	TRUE	0.3383	Rho GTPase activating protein 18 [Source:MGI Symbol;Acc:MGI:1921160]	10	26753421	26918648	1	Arhgap18	73910
ENSMUSG00000039155	250	217	278	96	131	94	271	214	279	92	123	96	179.01	255	104	408	-1294	-8105	0.0526903	1.05713	0.0164	0.0107	0.0117	0.0117	TRUE	0.2637	cadherin-like 26 [Source:MGI Symbol;Acc:MGI:2685856]	2	178430531	178487366	1	Cdh26	381409
ENSMUSG00000039158	160	213	217	100	98	88	173	210	218	95	92	90	146.38	200	92	461	-1116	-6902	513.16	7278.76	0	0.0127	11	11	TRUE	0.1481	AT-hook transcription factor [Source:MGI Symbol;Acc:MGI:2140340]	4	63367125	63403354	-1	Akna	100182
ENSMUSG00000039239	611	751	732	365	381	314	661	740	735	348	357	322	527.16	712	342	481	-1056	-11484	1.57876e-17	6.80028e-15	0.0015	0.0046	4	4	TRUE	45	transforming growth factor, beta 2 [Source:MGI Symbol;Acc:MGI:98726]	1	186622792	186705989	-1	Tgfb2	21808
ENSMUSG00000039298	1309	1520	1578	697	760	778	1417	1497	1584	665	711	798	1112.14	1499	725	483	-1.05	-13679	1.34742e-28	8.97182e-27	0.0044	0.0029	0.0032	0.0032	TRUE	0.0912	CDK5 regulatory subunit associated protein 2 [Source:MGI Symbol;Acc:MGI:2384875]	4	70216856	70410443	-1	Cdk5rap2	214444
ENSMUSG00000039347	33	49	43	6	8	10	36	48	43	6	7	10	25.1	42	8	183	-2447	-5735	976724	9.65204e+06	0	0.0675	0.0568	0.0568	TRUE	0.2005	ATPase, H+ transporting, lysosomal V0 subunit E2 [Source:MGI Symbol;Acc:MGI:1923502]	6	48537615	48541801	1	Atp6v0e2	76252
ENSMUSG00000039470	277	288	277	109	132	108	300	284	278	104	124	111	199.99	287	113	393	-1347	-9685	3.47778e-08	1.01201e-06	0	0.0097	0.0079	0.0079	TRUE	0.0727	zinc finger, DHHC domain containing 2 [Source:MGI Symbol;Acc:MGI:1923452]	8	40423815	40510268	1	Zdhhc2	70546
ENSMUSG00000039616	40	41	34	13	21	16	43	40	34	12	20	16	27.71	39	16	412	-1279	-3552	0.000382056962416947	0.00181652777141678	0	0.0613	0.0504	0.0504	TRUE	0.2093	molybdenum cofactor sulfurase [Source:MGI Symbol;Acc:MGI:1915841]	18	24653691	24701575	1	Mocos	68591
ENSMUSG00000039742	21	19	23	5	7	7	23	19	23	5	7	7	13.84	22	6	286	-1804	-3439	0.000583720255621574	0.00265609264628999	0	0.1213	0.0956	0.0956	TRUE	0.0994	family with sequence similarity 71, member F1 [Source:MGI Symbol;Acc:MGI:3032524]	6	29319140	29336019	1	Fam71f1	330277
ENSMUSG00000039781	121	159	142	49	57	71	131	157	143	47	53	73	100.51	144	58	0.4	-1.32	-6572	4955.02	63437.6	0.0114	0.0179	0.0171	0.0171	TRUE	0.4404	centrosomal protein 131 [Source:MGI Symbol;Acc:MGI:107440]	11	120064430	120086827	-1	Cep131	12009
ENSMUSG00000039903	185	212	285	98	118	94	200	209	286	94	110	96	165.93	232	100	432	-1.21	-7223	50.6952	802.7	0.0203	0.0114	0.0132	0.0132	TRUE	0.4675	eva-1 homolog C (C. elegans) [Source:MGI Symbol;Acc:MGI:1918217]	16	90826719	90905109	1	Eva1c	70967
ENSMUSG00000039934	117	157	160	52	58	33	127	155	161	50	54	34	96.61	148	46	313	-1677	-7.94	0.20196	0.389316	0.0152	0.0186	0.0181	0.0181	TRUE	0.4007	gamma-secretase activating protein [Source:MGI Symbol;Acc:MGI:2442259]	5	21186255	21315132	1	Gsap	212167
ENSMUSG00000040037	17	30	32	5	6	2	18	30	32	5	6	2	15.42	27	4	157	-2675	-4704	2.54811e+08	1.80714e+09	0	109	98	98	TRUE	0.4403	neuronal growth regulator 1 [Source:MGI Symbol;Acc:MGI:2444846]	3	156561794	157316445	1	Negr1	320840
ENSMUSG00000040289	24	27	17	5	2	6	26	27	17	5	2	6	13.74	23	4	182	-2457	-4217	2.47919e+09	0.000148712579405941	0	0.1222	0.1077	0.1077	TRUE	0.4675	hairy/enhancer-of-split related with YRPW motif 1 [Source:MGI Symbol;Acc:MGI:1341800]	3	8663359	8667256	-1	Hey1	15213
ENSMUSG00000040329	61	39	46	10	11	13	66	38	46	10	10	13	30.63	50	11	0.22	-2184	-5681	1.33968e+06	1.30111e+07	0	0.0556	0.0522	0.0522	TRUE	0.3062	interleukin 7 [Source:MGI Symbol;Acc:MGI:96561]	3	7569994	7613760	-1	Il7	16196
ENSMUSG00000040428	33	32	44	9	16	5	36	32	44	9	15	5	23.35	37	10	0.26	-1944	-4542	5.56341e+08	3.73869e+09	0.0293	0.0725	0.0679	0.0679	TRUE	0.8719	pleckstrin homology domain containing, family A (phosphoinositide binding specific) member 4 [Source:MGI Symbol;Acc:MGI:1916467]	7	45526330	45554229	1	Plekha4	69217
ENSMUSG00000040570	26	21	19	12	9	2	28	21	19	11	8	2	14.97	23	7	327	-1613	-3075	0.00210565625640329	0.0083373270832608	0.0857	0.1122	0.11	0.11	TRUE	10287	RUN domain containing 3B [Source:MGI Symbol;Acc:MGI:2685286]	5	8490334	8622952	-1	Rundc3b	242819
ENSMUSG00000040584	121	139	145	43	29	29	131	137	146	41	27	30	85.23	138	33	237	-2077	-9229	2.73741e-06	7.19657e-05	0	0.0209	0.0179	0.0179	TRUE	0.3632	ATP-binding cassette, sub-family B (MDR/TAP), member 1A [Source:MGI Symbol;Acc:MGI:97570]	5	8660077	8748575	1	Abcb1a	18671
ENSMUSG00000040721	81	102	89	53	51	39	88	100	89	51	48	40	69.3	92	46	499	-1003	-4458	8.27065e+08	5.38647e+09	0	0.0253	0.0204	0.0204	TRUE	0.1018	zinc finger homeobox 2 [Source:MGI Symbol;Acc:MGI:2686934]	14	55060262	55092324	-1	Zfhx2	239102
ENSMUSG00000041046	30	27	32	11	13	8	32	27	32	10	12	8	20.34	30	10	0.34	-1556	-3666	0.000246184390410466	0.00121996086609645	0	83	66	66	TRUE	0.1062	receptor (calcitonin) activity modifying protein 3 [Source:MGI Symbol;Acc:MGI:1860292]	11	6658521	6677475	1	Ramp3	56089
ENSMUSG00000041439	201	238	230	80	107	103	218	234	231	76	100	106	160.84	228	94	413	-1277	-8105	0.0527714	1.05737	0.0006	0.0117	0.0105	0.0105	TRUE	0.2673	major facilitator superfamily domain containing 6 [Source:MGI Symbol;Acc:MGI:1922925]	1	52656286	52727462	-1	Mfsd6	98682
ENSMUSG00000041488	136	154	150	65	78	68	147	152	151	62	73	70	109.05	150	68	456	-1134	-6286	3264.24	385539	0	0.0166	0.0129	0.0129	TRUE	0.0592	syntaxin 3 [Source:MGI Symbol;Acc:MGI:103077]	19	11775118	11819403	-1	Stx3	20908
ENSMUSG00000041552	29	27	26	3	5	2	31	27	26	3	5	2	15.61	28	3	115	-3117	-5221	1.78375e+07	1.5002e+08	0	0.1077	0.0882	0.0882	TRUE	244	patched domain containing 1 [Source:MGI Symbol;Acc:MGI:2685233]	X	155573455	155623814	-1	Ptchd1	211612
ENSMUSG00000041757	323	325	377	14	23	15	350	320	379	13	22	15	183.07	350	17	48	-4377	-18587	4.10294e-63	6.95129e-61	0	0.0105	0.0096	0.0096	TRUE	0.3107	pleckstrin homology domain containing, family A member 6 [Source:MGI Symbol;Acc:MGI:2388662]	1	133164210	133303435	1	Plekha6	240753
ENSMUSG00000041912	30	25	30	4	7	2	32	25	30	4	7	2	16.61	29	4	144	-2793	-5055	4.29568e+07	3.42935e+08	0	0.1013	0.0865	0.0865	TRUE	0.4785	tudor and KH domain containing protein [Source:MGI Symbol;Acc:MGI:1919884]	3	94413273	94434668	1	Tdrkh	72634
ENSMUSG00000042190	53	67	56	15	4	11	57	66	56	14	4	11	34.82	60	10	162	-2622	-6865	665.56	9319.07	0	0.0491	0.0467	0.0467	TRUE	10955	chemokine-like receptor 1 [Source:MGI Symbol;Acc:MGI:109603]	5	113612354	113650426	-1	Cmklr1	14747
ENSMUSG00000042195	7	18	11	1	2	1	8	18	11	1	2	1	6.7	12	1	106	-3234	-3442	0.000577236133260276	0.00263129942001575	0	249	0.2184	0.2184	TRUE	0.1681	solute carrier family 35, member F2 [Source:MGI Symbol;Acc:MGI:1919272]	9	53771538	53818154	1	Slc35f2	72022
ENSMUSG00000042213	63	69	73	35	30	42	68	68	73	33	28	43	52.33	70	35	498	-1007	-3862	0.000112497217767145	0.000597893892127373	0	0.0331	0.0277	0.0277	TRUE	0.2955	zinc finger, AN1-type domain 4 [Source:MGI Symbol;Acc:MGI:1914742]	6	116264222	116330302	1	Zfand4	67492
ENSMUSG00000042258	13	10	12	0	0	0	14	10	12	0	0	0	5.99	12	0	15	-6066	-4546	5.45461e+08	3.66719e+09	0	0.2782	0.2402	0.2402	TRUE	0.0815	ISL1 transcription factor, LIM/homeodomain [Source:MGI Symbol;Acc:MGI:101791]	13	116298281	116309689	-1	Isl1	16392
ENSMUSG00000042359	109	119	117	44	31	33	118	117	117	42	29	34	76.25	117	35	297	-1.75	-7694	1.42602	25.6112	0	0.0232	19	19	TRUE	0.2307	oxysterol binding protein-like 6 [Source:MGI Symbol;Acc:MGI:2139014]	2	76406508	76600647	1	Osbpl6	99031
ENSMUSG00000042428	297	343	324	121	126	89	321	338	325	115	118	91	218.21	328	108	331	-1597	-11565	6.22542e-17	2.70442e-15	0	9	0.0077	0.0077	TRUE	0.1791	mannoside acetylglucosaminyltransferase 3 [Source:MGI Symbol;Acc:MGI:104532]	15	80173721	80215519	1	Mgat3	17309
ENSMUSG00000042613	322	373	443	179	178	160	349	367	445	171	167	164	277.04	387	167	432	-1211	-9557	1.2133e-07	3.40708e-06	0.0071	0.0074	0.0073	0.0073	TRUE	0.1974	pre B cell leukemia transcription factor interacting protein 1 [Source:MGI Symbol;Acc:MGI:2441670]	3	89436706	89450952	1	Pbxip1	229534
ENSMUSG00000042686	93	104	141	48	60	46	101	102	142	46	56	47	82.3	115	50	433	-1208	-5478	4.31298e+06	3.94271e+07	0.0176	0.0216	0.0208	0.0208	TRUE	0.4166	junctophilin 1 [Source:MGI Symbol;Acc:MGI:1891495]	1	16964560	17097889	-1	Jph1	57339
ENSMUSG00000042751	61	59	57	25	38	21	66	58	57	24	36	22	43.72	60	27	448	-1157	-3989	6.62919e+09	0.000365708964550186	0.0015	0.0394	0.0342	0.0342	TRUE	0.5125	nicotinamide nucleotide adenylyltransferase 2 [Source:MGI Symbol;Acc:MGI:2444155]	1	152954993	153119261	1	Nmnat2	226518
ENSMUSG00000042793	22	22	13	3	6	0	24	22	13	3	6	0	11.17	20	3	148	-2755	-3997	6.42562e+09	0.000355249699228269	0.1203	0.15	148	148	TRUE	0.9696	leucine-rich repeat-containing G protein-coupled receptor 6 [Source:MGI Symbol;Acc:MGI:2441805]	1	134983301	135105276	-1	Lgr6	329252
ENSMUSG00000043572	97	125	99	43	42	31	105	123	99	41	39	32	73.27	109	37	343	-1544	-6724	1773.49	24016.1	0	24	0.0203	0.0203	TRUE	0.1266	prolyl-tRNA synthetase (mitochondrial)(putative) [Source:MGI Symbol;Acc:MGI:2386296]	4	106651069	106655282	1	Pars2	230577
ENSMUSG00000043822	139	181	163	23	35	32	150	178	164	22	33	33	96.65	164	29	177	-2495	-11.14	7.96818e-15	3.21426e-13	0	0.0186	0.0164	0.0164	TRUE	0.3215	ADAMTS-like 5 [Source:MGI Symbol;Acc:MGI:1913798]	10	80339110	80348412	-1	Adamtsl5	66548
ENSMUSG00000043895	435	437	440	206	218	180	471	430	442	197	204	185	321.38	448	195	436	-1196	-10772	4.67569e-14	1.7389e-11	0	0.0066	0.0053	0.0053	TRUE	0.0233	sphingosine-1-phosphate receptor 2 [Source:MGI Symbol;Acc:MGI:99569]	9	20962361	20976781	-1	S1pr2	14739
ENSMUSG00000044080	38	49	43	22	20	23	41	48	43	21	19	24	32.65	44	21	476	-1.07	-3306	0.000946391231745269	0.00409959474478746	0	0.0522	0.0409	0.0409	TRUE	0.0578	S100 calcium binding protein A1 [Source:MGI Symbol;Acc:MGI:1338917]	3	90511034	90514392	-1	S100a1	20193
ENSMUSG00000044197	142	149	160	64	63	46	154	147	161	61	59	47	104.72	154	56	364	-1.46	-7668	1.74421	30.8894	0	0.0173	0.0141	0.0141	TRUE	0.1457	G protein-coupled receptor 146 [Source:MGI Symbol;Acc:MGI:1933113]	5	139377697	139396415	1	Gpr146	80290
ENSMUSG00000044217	1297	1437	1279	691	687	638	1404	1415	1284	659	643	655	1010.04	1368	652	477	-1068	-14953	1.48239e-36	1.27704e-34	0	3	0.0026	0.0026	TRUE	0.0346	aquaporin 5 [Source:MGI Symbol;Acc:MGI:106215]	15	99590782	99594829	1	Aqp5	11830
ENSMUSG00000044365	19	20	20	8	7	4	21	20	20	8	7	4	13.11	20	6	305	-1714	-3209	0.00133008252431759	0.00557632618388634	0	128	0.1009	0.1009	TRUE	0.1844	CXXC finger 4 [Source:MGI Symbol;Acc:MGI:2442112]	3	134236484	134262161	1	Cxxc4	319478
ENSMUSG00000044646	298	383	402	158	154	122	323	377	404	151	144	125	253.91	368	140	381	-1392	-10501	8.58016e-12	2.95328e-11	0.0073	0.0079	0.0078	0.0078	TRUE	0.1299	zinc finger and BTB domain containing 7C [Source:MGI Symbol;Acc:MGI:2443302]	18	75820178	76148564	1	Zbtb7c	207259
ENSMUSG00000045319	37	43	37	14	16	14	40	42	37	13	15	14	27.04	40	14	357	-1485	-4082	4.46482e+09	0.000255362399095884	0	0.0628	0.0484	0.0484	TRUE	0.0268	proline and serine rich 2 [Source:MGI Symbol;Acc:MGI:2442238]	2	6097607	6130211	-1	Proser2	227545
ENSMUSG00000045620	15	12	26	3	1	4	16	12	26	3	1	4	10.34	18	3	144	-2795	-3916	9.01897e+08	0.000486801081377871	0	0.1618	0.1522	0.1522	TRUE	255	outer dense fiber of sperm tails 3-like 1 [Source:MGI Symbol;Acc:MGI:2681875]	9	56848659	56864679	-1	Odf3l1	382075
ENSMUSG00000045658	126	148	220	29	42	21	136	146	221	28	39	22	98.59	168	30	177	-2.5	-10047	9.5151e-11	2.97918e-08	0.0624	0.0182	0.0252	0.0252	TRUE	0.8222	phosphotyrosine interaction domain containing 1 [Source:MGI Symbol;Acc:MGI:2138391]	1	84036296	84364180	-1	Pid1	98496
ENSMUSG00000045659	155	172	207	73	77	56	168	169	208	70	72	57	124.03	182	66	366	-1.45	-8023	0.103497	2.03629	0	0.0148	0.0134	0.0134	TRUE	0.1716	pleckstrin homology domain containing, family A member 7 [Source:MGI Symbol;Acc:MGI:2445094]	7	116123485	116308376	-1	Plekha7	233765
ENSMUSG00000045679	225	237	255	64	73	51	244	233	256	61	68	52	152.45	244	60	249	-2008	-11963	5.54944e-19	2.56418e-17	0	0.0123	0.0102	0.0102	TRUE	0.1179	PQ loop repeat containing [Source:MGI Symbol;Acc:MGI:2444067]	12	16988648	17000408	-1	Pqlc3	217430
ENSMUSG00000046178	45	44	88	0	0	0	49	43	88	0	0	0	30.06	60	0	3	-8395	-6.87	640.369	8974.58	0.1487	0.0566	0.0676	0.0676	TRUE	14628	neurexophilin 1 [Source:MGI Symbol;Acc:MGI:107492]	6	8948431	9249032	1	Nxph1	18231
ENSMUSG00000046442	104	130	143	58	70	57	113	128	144	55	66	58	93.92	128	60	467	-1099	-5547	2.90814e+06	2.71379e+07	0	0.0191	0.0162	0.0162	TRUE	0.1042	protein phosphatase 1E (PP2C domain containing) [Source:MGI Symbol;Acc:MGI:2444096]	11	87226906	87359023	-1	Ppm1e	320472
ENSMUSG00000046449	33	54	41	6	6	6	36	53	41	6	6	6	24.59	43	6	134	-2898	-6269	36272.8	42607.3	0	0.0689	0.0589	0.0589	TRUE	0.2355	neurite extension and migration factor [Source:MGI Symbol;Acc:MGI:2148050]	X	104077434	104201185	-1	Nexmif	245555
ENSMUSG00000046711	2445	2721	2467	480	498	520	2646	2680	2477	458	466	534	1543.44	2601	486	187	-2422	-33936	1.96322e-238	1.99568e-235	0.0027	0.0025	0.0025	0.0025	TRUE	0.0836	high mobility group AT-hook 1 [Source:MGI Symbol;Acc:MGI:96160]	17	27556497	27563674	1	Hmga1	15361
ENSMUSG00000046727	84	94	69	25	26	29	91	93	69	24	24	30	55.12	84	26	308	-1.7	-6324	25518.3	306622	0	0.0315	0.0273	0.0273	TRUE	0.2301	cysteine-rich transmembrane module containing 1 [Source:MGI Symbol;Acc:MGI:1913310]	18	36342520	36403097	1	Cystm1	66060
ENSMUSG00000046733	331	387	322	144	110	141	358	381	323	137	103	145	241.29	354	128	362	-1468	-10548	5.20909e-12	1.82594e-10	0.0113	0.0083	0.0087	0.0087	TRUE	0.3155	G protein-coupled receptor, family C, group 5, member A [Source:MGI Symbol;Acc:MGI:1891250]	6	135065651	135084709	1	Gprc5a	232431
ENSMUSG00000046814	82	100	79	35	34	29	89	98	79	33	32	30	60.26	89	32	357	-1488	-5.99	209205	2.25439e+06	0	0.0289	0.0234	0.0234	TRUE	0.0881	GTP cyclohydrolase I feedback regulator [Source:MGI Symbol;Acc:MGI:2443977]	2	119167773	119172390	1	Gchfr	320415
ENSMUSG00000046949	381	384	379	172	176	162	412	378	381	164	165	166	277.69	390	165	423	-1241	-10.53	6.26076e-12	2.17955e-10	0	0.0074	0.0058	0.0058	TRUE	0.0274	N-ribosyldihydronicotinamide quinone reductase 2 [Source:MGI Symbol;Acc:MGI:104513]	13	33964687	33988443	1	Nqo2	18105
ENSMUSG00000047161	17	25	29	2	0	2	18	25	29	2	0	2	12.68	24	1	54	-4214	-5001	5.6972e+07	4.47557e+08	0	0.1322	0.1164	0.1164	TRUE	0.4446	carbohydrate (N-acetylgalactosamine 4-0) sulfotransferase 9 [Source:MGI Symbol;Acc:MGI:1918617]	18	15451924	15760157	-1	Chst9	71367
ENSMUSG00000047250	194	202	200	100	110	78	210	199	201	95	103	80	148.02	203	93	458	-1127	-7101	123.644	1900.52	0	0.0126	0.0104	0.0104	TRUE	0.1351	prostaglandin-endoperoxide synthase 1 [Source:MGI Symbol;Acc:MGI:97797]	2	36230426	36252272	1	Ptgs1	19224
ENSMUSG00000047344	71	86	89	40	39	27	77	85	89	38	37	28	58.88	84	34	409	-1.29	-5188	2.12727e+07	1.77152e+08	0	0.0296	0.0243	0.0243	TRUE	183	LanC lantibiotic synthetase component C-like 3 (bacterial) [Source:MGI Symbol;Acc:MGI:2443335]	X	9199902	9268085	1	Lancl3	236285
ENSMUSG00000048351	205	214	209	96	74	90	222	211	210	92	69	92	149.28	214	84	394	-1345	-8293	0.0110569	0.233511	0.0001	0.0125	0.0108	0.0108	TRUE	0.2411	cytochrome c oxidase assembly factor 7 [Source:MGI Symbol;Acc:MGI:1917143]	4	108328140	108341544	1	Coa7	69893
ENSMUSG00000048458	140	173	175	58	65	54	152	170	176	55	61	55	111.53	166	57	345	-1536	-8302	0.0102618	0.217322	0	0.0163	0.0131	0.0131	TRUE	0.0591	inka box actin regulator 2 [Source:MGI Symbol;Acc:MGI:1923497]	3	105704599	105720842	1	Inka2	109050
ENSMUSG00000049100	80	76	90	3	5	3	87	75	90	3	5	3	43.74	84	4	42	-4.56	-9231	2.69195e-07	7.08927e-06	0	0.0393	0.0333	0.0333	TRUE	0.1318	protocadherin 10 [Source:MGI Symbol;Acc:MGI:1338042]	3	45378398	45435623	1	Pcdh10	18526
ENSMUSG00000049321	57	56	65	28	34	27	62	55	65	27	32	28	44.73	61	29	474	-1076	-3875	0.000106541077513382	0.000568219080071371	0	0.0385	0.0303	0.0303	TRUE	0.0606	zinc finger protein 2 [Source:MGI Symbol;Acc:MGI:99167]	11	50898712	50916165	-1	Zfp2	22678
ENSMUSG00000049556	21	21	14	2	6	7	23	21	14	2	6	7	12.03	19	5	255	-1973	-3347	0.000816868502336374	0.00360301154863322	0	0.1393	0.1241	0.1241	TRUE	0.6011	leucine rich repeat and Ig domain containing 1 [Source:MGI Symbol;Acc:MGI:1915522]	9	56618475	56796468	-1	Lingo1	235402
ENSMUSG00000049858	56	67	51	29	26	36	61	66	51	28	24	37	44.46	59	30	499	-1004	-3528	0.000419287513597807	0.00197567861784282	0	0.0387	0.0333	0.0333	TRUE	0.2975	sulfite oxidase [Source:MGI Symbol;Acc:MGI:2446117]	10	128669894	128674073	-1	Suox	211389
ENSMUSG00000050212	56	74	55	6	11	11	61	73	55	6	10	11	36	63	9	144	-2795	-7387	15.067	247.3	0	0.0475	0.0415	0.0415	TRUE	0.3604	eva-1 homolog B (C. elegans) [Source:MGI Symbol;Acc:MGI:1922063]	4	126147744	126149875	1	Eva1b	230752
ENSMUSG00000050335	1803	1931	1837	832	856	878	1951	1902	1844	794	801	901	1365.6	1899	832	438	-1191	-17.7	4.16857e-56	5.8854e-54	0.0017	0.0026	0.0024	0.0024	TRUE	0.0613	lectin, galactose binding, soluble 3 [Source:MGI Symbol;Acc:MGI:96778]	14	47367751	47386160	1	Lgals3	16854
ENSMUSG00000050390	546	610	544	295	311	235	591	601	546	281	291	241	425.27	579	271	469	-1093	-10702	9.93722e-13	3.64237e-11	0.0025	0.0053	0.0048	0.0048	TRUE	103	expressed sequence C77080 [Source:MGI Symbol;Acc:MGI:2140651]	4	129219578	129261404	-1	C77080	97130
ENSMUSG00000050914	34	27	12	9	5	6	37	27	12	9	5	6	15.81	25	7	258	-1954	-3.62	0.000294932496239971	0.00144185017719368	0.1509	0.1063	0.1145	0.1145	TRUE	0.1236	ankyrin repeat domain 37 [Source:MGI Symbol;Acc:MGI:3603344]	8	45996902	46005707	-1	Ankrd37	654824
ENSMUSG00000051375	416	515	421	189	181	157	450	507	423	180	169	161	315.17	460	170	0.37	-1433	-12114	8.87065e-20	4.26687e-18	0	0.0067	0.0061	0.0061	TRUE	0.0948	protocadherin 1 [Source:MGI Symbol;Acc:MGI:104692]	18	38185914	38212053	-1	Pcdh1	75599
ENSMUSG00000051457	46	57	57	24	27	21	50	56	57	23	25	22	38.81	54	23	428	-1226	-4094	4.24636e+09	0.000243965516899588	0	0.0442	0.0344	0.0344	TRUE	0.0438	sialophorin [Source:MGI Symbol;Acc:MGI:98384]	7	127132232	127137823	-1	Spn	20737
ENSMUSG00000051977	37	45	56	27	24	20	40	44	56	26	22	21	34.89	47	23	489	-1032	-3.25	0.00115571807909738	0.00489919078956819	0	49	0.0406	0.0406	TRUE	0.2435	PR domain containing 9 [Source:MGI Symbol;Acc:MGI:2384854]	17	15543079	15564354	-1	Prdm9	213389
ENSMUSG00000052135	46	36	47	21	14	13	50	35	47	20	13	13	29.82	44	15	352	-1506	-4212	2.53305e+09	0.000151525818398905	0	57	0.0493	0.0493	TRUE	0.3203	forkhead box O6 [Source:MGI Symbol;Acc:MGI:2676586]	4	120267079	120287349	-1	Foxo6	329934
ENSMUSG00000052151	767	841	781	348	366	333	830	828	784	332	343	342	576.48	814	339	416	-1265	-14688	7.7001e-35	6.38104e-33	0	0.0043	0.0033	0.0033	TRUE	0.0125	phospholipid phosphatase 2 [Source:MGI Symbol;Acc:MGI:1354945]	10	79526430	79533796	-1	Plpp2	50784
ENSMUSG00000052372	79	92	161	16	19	20	86	91	162	15	18	21	65.22	113	18	158	-2661	-8649	0.000517838	0.0118916	0.0749	0.0268	0.0364	0.0364	TRUE	14576	interleukin 1 receptor accessory protein-like 1 [Source:MGI Symbol;Acc:MGI:2687319]	X	86740870	88115645	-1	Il1rapl1	331461
ENSMUSG00000052479	48	48	71	0	0	0	52	47	71	0	0	0	28.42	57	0	3	-8314	-6838	804.13	11167.7	0.0324	0.0598	0.0564	0.0564	TRUE	423	RIKEN cDNA A330008L17 gene [Source:MGI Symbol;Acc:MGI:2443215]	8	99416642	99733438	1	A330008L17Rik	NA
ENSMUSG00000052688	174	204	204	66	76	57	188	201	205	63	71	58	131.11	198	64	325	-1623	-9414	4.77742e-07	1.30315e-05	0	0.0141	0.0113	0.0113	TRUE	0.0811	RAB7B, member RAS oncogene family [Source:MGI Symbol;Acc:MGI:2442295]	1	131688695	131715439	1	Rab7b	226421
ENSMUSG00000052726	392	421	567	182	211	182	424	415	569	174	198	187	327.68	469	186	396	-1336	-10196	2.06089e-11	6.62964e-09	0.0169	0.0065	0.0087	0.0087	TRUE	0.4044	potassium channel, subfamily T, member 2 [Source:MGI Symbol;Acc:MGI:3036273]	1	140246158	140612067	1	Kcnt2	240776
ENSMUSG00000052914	352	415	456	222	225	179	381	409	458	212	211	184	308.94	416	202	486	-1041	-8849	8.86673e-05	0.00212245	0.0044	0.0068	0.0063	0.0063	TRUE	0.09	cytochrome P450, family 2, subfamily j, polypeptide 6 [Source:MGI Symbol;Acc:MGI:1270148]	4	96516138	96553661	-1	Cyp2j6	13110
ENSMUSG00000053411	159	214	225	102	102	94	172	211	226	97	95	96	149.67	203	96	475	-1075	-6656	2822.37	37357.3	0	0.0125	0.0113	0.0113	TRUE	0.1869	chromobox 7 [Source:MGI Symbol;Acc:MGI:1196439]	15	79915807	79971119	-1	Cbx7	52609
ENSMUSG00000053470	936	941	1011	462	434	416	1013	927	1015	441	406	427	704.8	985	425	431	-1214	-14805	1.36755e-35	1.17148e-33	0	0.0038	0.0032	0.0032	TRUE	0.0323	lysine (K)-specific demethylase 3A [Source:MGI Symbol;Acc:MGI:98847]	6	71588972	71632990	-1	Kdm3a	104263
ENSMUSG00000054136	11	26	15	3	3	1	12	26	15	3	3	1	9.88	18	2	128	-2962	-3982	6.84318e+08	0.000376696098978542	0	0.1694	0.1544	0.1544	TRUE	0.4907	adrenomedullin 2 [Source:MGI Symbol;Acc:MGI:2675256]	15	89322720	89324731	1	Adm2	223780
ENSMUSG00000054150	417	483	484	132	154	100	451	476	486	126	144	103	297.61	471	124	264	-1919	-15113	1.33793e-37	1.2216e-35	0.0033	7	0.0066	0.0066	TRUE	0.2281	spectrin repeat containing, nuclear envelope family member 3 [Source:MGI Symbol;Acc:MGI:2442408]	12	104929933	105009809	-1	Syne3	212073
ENSMUSG00000054342	306	355	374	76	70	59	331	350	375	73	66	61	209.15	352	67	188	-2.41	-15859	1.22576e-42	1.22963e-40	0	0.0093	0.0079	0.0079	TRUE	0.0625	potassium intermediate/small conductance calcium-activated channel, subfamily N, member 4 [Source:MGI Symbol;Acc:MGI:1277957]	7	24370263	24386690	1	Kcnn4	16534
ENSMUSG00000054409	85	91	83	35	51	45	92	90	83	33	48	46	65.38	88	42	0.48	-1058	-4509	6.50611e+08	4.32078e+09	0	0.0268	0.0224	0.0224	TRUE	0.2759	transmembrane protein 74 [Source:MGI Symbol;Acc:MGI:2443417]	15	43864646	43870036	-1	Tmem74	239408
ENSMUSG00000054702	44	45	36	17	16	12	48	44	36	16	15	12	28.6	43	14	341	-1553	-4313	1.61135e+09	9.97156e+09	0	0.0594	0.0481	0.0481	TRUE	0.1393	adaptor-related protein complex AP-1, sigma 3 [Source:MGI Symbol;Acc:MGI:1891304]	1	79606876	79671972	-1	Ap1s3	252903
ENSMUSG00000054752	190	201	214	33	41	38	206	198	215	31	38	39	121.22	206	36	176	-2507	-12703	5.68524e-23	3.05242e-21	0	0.0151	0.0122	0.0122	TRUE	0.1	fibronectin type III and SPRY domain containing 1-like [Source:MGI Symbol;Acc:MGI:2442443]	4	53631471	53707009	1	Fsd1l	319636
ENSMUSG00000055322	874	972	1091	265	286	247	946	957	1095	253	268	253	628.77	999	258	258	-1954	-20895	5.90928e-84	1.50175e-80	0.0034	4	0.0039	0.0039	TRUE	0.0843	tensin 1 [Source:MGI Symbol;Acc:MGI:104552]	1	73910231	74124449	-1	Tns1	21961
ENSMUSG00000055407	501	570	625	257	270	219	542	561	627	245	253	225	408.97	577	241	418	-1259	-12088	1.22604e-19	5.8421e-18	0.0027	0.0055	0.0049	0.0049	TRUE	0.0688	microtubule-associated protein 6 [Source:MGI Symbol;Acc:MGI:1201690]	7	99267447	99337137	1	Map6	17760
ENSMUSG00000055421	51	63	56	28	24	13	55	62	56	27	22	13	39.33	58	21	362	-1466	-4.69	2.73157e+08	1.92384e+08	0	0.0436	0.0384	0.0384	TRUE	0.5234	protocadherin 9 [Source:MGI Symbol;Acc:MGI:1306801]	14	93013410	93890679	-1	Pcdh9	211712
ENSMUSG00000055538	794	886	870	456	450	362	859	873	873	435	421	371	638.87	868	409	472	-1084	-12781	2.09039e-24	1.14656e-21	0	4	0.0034	0.0034	TRUE	0.0735	zinc finger, CCHC domain containing 24 [Source:MGI Symbol;Acc:MGI:1919168]	14	25711642	25769039	-1	Zcchc24	71918
ENSMUSG00000055782	31	39	42	19	18	15	34	38	42	18	17	15	27.42	38	17	441	-1.18	-3324	0.000887533094507586	0.00387116489583684	0	0.0619	0.0485	0.0485	TRUE	0.0745	ATP-binding cassette, sub-family D (ALD), member 2 [Source:MGI Symbol;Acc:MGI:1349467]	15	91145871	91191799	-1	Abcd2	26874
ENSMUSG00000056486	13	21	27	5	11	3	14	21	27	5	10	3	13.33	21	6	295	-1759	-3145	0.00166265281541461	0.00676417559483509	91	0.1258	0.1213	0.1213	TRUE	334	chimerin 1 [Source:MGI Symbol;Acc:MGI:1915674]	2	73610660	73775346	-1	Chn1	108699
ENSMUSG00000056673	999	1088	1157	87	92	88	1081	1072	1162	83	86	90	595.63	1105	86	78	-3677	-31787	9.93316e-208	7.21242e-205	0	0.0042	0.0036	0.0036	TRUE	0.0244	lysine (K)-specific demethylase 5D [Source:MGI Symbol;Acc:MGI:99780]	Y	897788	956786	1	Kdm5d	20592
ENSMUSG00000056724	137	187	185	72	71	73	148	184	186	69	66	75	121.38	173	70	404	-1306	-7306	27.488	443.062	0	0.0151	0.0131	0.0131	TRUE	0.1592	neurobeachin-like 2 [Source:MGI Symbol;Acc:MGI:2448554]	9	110624789	110654161	-1	Nbeal2	235627
ENSMUSG00000057346	98	127	107	21	25	16	106	125	107	20	23	16	66.4	113	20	177	-2495	-9386	6.22058e-07	1.68475e-06	0	0.0264	0.0222	0.0222	TRUE	0.1293	apolipoprotein L 9a [Source:MGI Symbol;Acc:MGI:3606001]	15	77403789	77411135	-1	Apol9a	223672
ENSMUSG00000057614	33	33	30	11	13	9	36	33	30	10	12	9	21.71	33	10	325	-1619	-3934	8.33721e+09	0.000451761948761406	0	0.0778	0.0609	0.0609	TRUE	0.0615	guanine nucleotide binding protein (G protein), alpha inhibiting 1 [Source:MGI Symbol;Acc:MGI:95771]	5	18265135	18360355	-1	Gnai1	14677
ENSMUSG00000057895	18	24	15	1	1	1	19	24	15	1	1	1	10.18	19	1	0.05	-4321	-4499	6.83414e+08	4.52091e+08	0	0.1643	0.1384	0.1384	TRUE	0.0647	zinc finger protein 105 [Source:MGI Symbol;Acc:MGI:1277119]	9	122923072	122931028	1	Zfp105	22646
ENSMUSG00000057969	80	88	68	8	9	9	87	87	68	8	8	9	44.47	81	8	105	-3257	-8881	6.61123e-05	0.00159255	0	0.0387	0.0329	0.0329	TRUE	0.1661	sema domain, immunoglobulin domain (Ig), short basic domain, secreted, (semaphorin) 3B [Source:MGI Symbol;Acc:MGI:107561]	9	107597674	107609229	-1	Sema3b	20347
ENSMUSG00000058656	71	101	107	20	27	19	77	99	107	19	25	19	57.93	94	21	225	-2151	-7767	0.806523	14.6928	0	0.03	0.0271	0.0271	TRUE	0.2513	sterile alpha motif domain containing 12 [Source:MGI Symbol;Acc:MGI:2444518]	15	53453810	53902537	-1	Samd12	320679
ENSMUSG00000059401	82	93	117	51	50	42	89	92	117	49	47	43	72.73	99	46	465	-1104	-4903	9.41711e+07	7.14389e+08	0	0.0242	0.0208	0.0208	TRUE	0.2523	mastermind-like domain containing 1 [Source:MGI Symbol;Acc:MGI:3045303]	X	71050240	71156056	1	Mamld1	333639
ENSMUSG00000059824	195	186	217	51	38	41	211	183	218	49	36	42	123.07	204	42	206	-2277	-11726	9.39745e-18	4.22691e-16	0	0.0149	0.0131	0.0131	TRUE	0.1508	D site albumin promoter binding protein [Source:MGI Symbol;Acc:MGI:94866]	7	45705088	45710203	1	Dbp	13170
ENSMUSG00000059921	199	249	248	105	117	107	215	245	249	100	110	110	171.52	236	107	0.45	-1153	-7785	0.695897	12.7537	0	0.0111	0.0091	0.0091	TRUE	0.0659	unc-5 netrin receptor C [Source:MGI Symbol;Acc:MGI:1095412]	3	141465216	141834924	1	Unc5c	22253
ENSMUSG00000060224	19	15	21	0	3	1	21	15	21	0	3	1	10.04	19	1	69	-3863	-4427	9.56982e+08	6.15863e+09	0	0.1666	0.1456	0.1456	TRUE	0.7193	pyridine nucleotide-disulphide oxidoreductase domain 2 [Source:MGI Symbol;Acc:MGI:1921830]	19	42725858	42752775	-1	Pyroxd2	74580
ENSMUSG00000060275	90	123	146	17	19	21	97	121	147	16	18	22	70.11	122	19	152	-2722	-9838	7.69184e-10	2.31789e-07	0	0.0251	0.0247	0.0247	TRUE	0.0684	neuregulin 2 [Source:MGI Symbol;Acc:MGI:1098246]	18	36017652	36197380	-1	Nrg2	100042150
ENSMUSG00000061769	25	22	40	6	11	12	27	22	40	6	10	12	19.54	30	9	318	-1655	-3.62	0.000295168273465617	0.00144254033134735	0.0582	0.0863	0.0818	0.0818	TRUE	0.3467	killer cell lectin-like receptor, subfamily A, member 6 [Source:MGI Symbol;Acc:MGI:101902]	6	130013033	130026954	-1	Klra6	16637
ENSMUSG00000061815	9	5	7	0	0	0	10	5	7	0	0	0	3.62	7	0	25	-5335	-3722	0.000197839773694198	0.00100756876061761	0	0.4603	0.4098	0.4098	TRUE	0.0795	RUN and FYVE domain containing 4 [Source:MGI Symbol;Acc:MGI:3588214]	1	74125541	74148223	1	Rufy4	435626
ENSMUSG00000062627	659	707	777	327	344	268	713	696	780	312	322	275	516.45	730	303	416	-1267	-13278	3.12297e-26	1.86012e-25	0.0026	0.0046	0.0043	0.0043	TRUE	0.0721	myb-like, SWIRM and MPN domains 1 [Source:MGI Symbol;Acc:MGI:2444584]	4	94942040	94979100	-1	Mysm1	320713
ENSMUSG00000062753	124	116	131	57	46	50	134	114	132	54	43	51	88.12	127	49	391	-1353	-6565	5200.78	66361.1	0	0.0202	0.0168	0.0168	TRUE	0.1133	expressed sequence AI413582 [Source:MGI Symbol;Acc:MGI:2146839]	17	27563573	27565756	-1	AI413582	106672
ENSMUSG00000062794	28	35	27	5	7	3	30	34	27	5	7	3	17.71	30	5	158	-2663	-5115	3.13592e+07	2.55567e+08	0	0.0951	0.0782	0.0782	TRUE	0.2126	zinc finger protein 599 [Source:MGI Symbol;Acc:MGI:2679006]	9	22247430	22259895	-1	Zfp599	235048
ENSMUSG00000063011	294	332	345	22	21	20	318	327	346	21	20	21	175.45	330	21	62	-4019	-18427	7.93275e-63	1.31477e-59	0	0.0109	0.0089	0.0089	TRUE	0.0201	mesothelin [Source:MGI Symbol;Acc:MGI:1888992]	17	25748613	25754378	-1	Msln	56047
ENSMUSG00000063172	152	159	185	89	59	72	165	157	186	85	55	74	120.15	169	71	422	-1245	-6732	1673.3	2272	0.0123	0.0152	0.0148	0.0148	TRUE	0.3701	heat shock protein family B (small), member 11 [Source:MGI Symbol;Acc:MGI:1920188]	4	107253593	107279938	1	Hspb11	72938
ENSMUSG00000063193	33	33	34	15	14	19	36	33	34	14	13	19	24.88	34	15	457	-1.13	-3031	0.0024376988302713	0.00950397130247424	0	0.0681	54	54	TRUE	211	CD300 molecule like family member B [Source:MGI Symbol;Acc:MGI:2685099]	11	114922781	114934386	-1	Cd300lb	217304
ENSMUSG00000063286	47	47	50	3	5	7	51	46	50	3	5	7	27.01	49	5	99	-3335	-7028	209.272	3127.94	0	0.0628	0.0521	0.0521	TRUE	0.3113	predicted gene 8995 [Source:MGI Symbol;Acc:MGI:3644223]	7	106504239	106511671	-1	Gm8995	NA
ENSMUSG00000063415	15	25	21	4	5	1	16	25	21	4	5	1	11.91	21	3	156	-2684	-4181	2.90184e+09	0.000171967723405243	0	0.1407	0.1215	0.1215	TRUE	0.3879	cytochrome P450, family 26, subfamily b, polypeptide 1 [Source:MGI Symbol;Acc:MGI:2176159]	6	84571414	84593908	-1	Cyp26b1	232174
ENSMUSG00000063800	799	763	849	230	282	264	865	751	852	219	264	271	537.16	823	251	305	-1711	-16966	1.4751e-50	1.92242e-48	0.0061	0.0045	0.0048	0.0048	TRUE	0.1394	PRP38 pre-mRNA processing factor 38 (yeast) domain containing A [Source:MGI Symbol;Acc:MGI:1916962]	4	108563172	108579336	-1	Prpf38a	230596
ENSMUSG00000063851	5	14	13	2	0	0	5	14	13	2	0	0	5.69	11	1	0.06	-4063	-3323	0.000889185337588289	0.00387601430175707	0	0.2928	0.2777	0.2777	TRUE	0.9736	ring finger protein 183 [Source:MGI Symbol;Acc:MGI:1923322]	4	62427540	62435252	-1	Rnf183	76072
ENSMUSG00000064342	68	35	53	30	29	21	74	34	53	29	27	22	39.77	54	26	482	-1053	-3257	0.00112720055523829	0.00479563450509863	0.0638	0.0431	47	47	TRUE	113	mitochondrially encoded tRNA isoleucine [Source:MGI Symbol;Acc:MGI:102484]	MT	3706	3774	1	mt-Ti	NA
ENSMUSG00000064682	118	84	137	69	73	32	128	83	138	66	68	33	85.83	116	56	482	-1052	-4203	2.62911e+09	0.000156718712620001	0.0917	0.0207	32	32	TRUE	10521	predicted gene, 25813 [Source:MGI Symbol;Acc:MGI:5455590]	8	52336915	52337105	-1	Gm25813	NA
ENSMUSG00000065176	241	97	142	35	21	67	261	96	143	33	20	69	103.46	167	41	244	-2036	-3144	0.00166675556929268	0.00677905812765396	0.2872	0.0174	0.0615	0.2872	TRUE	0.4117	RNA U12, small nuclear [Source:MGI Symbol;Acc:MGI:1336893]	15	83149644	83149794	1	Rnu12	NA
ENSMUSG00000065820	35	29	22	9	17	9	38	29	22	9	16	9	20.38	30	11	383	-1383	-3181	0.00146536072786426	0.00606016283658102	0.0379	0.0828	0.0758	0.0758	TRUE	0.2734	predicted gene, 26316 [Source:MGI Symbol;Acc:MGI:5456093]	11	101604850	101605040	1	Gm26316	NA
ENSMUSG00000066113	19	16	24	2	1	0	21	16	24	2	1	0	10.54	20	1	48	-4378	-4562	5.06498e+08	3.41276e+09	0	0.1588	0.1369	0.1369	TRUE	0.3258	ADAMTS-like 1 [Source:MGI Symbol;Acc:MGI:1924989]	4	85514172	86428385	1	Adamtsl1	77739
ENSMUSG00000066152	66	67	75	29	23	33	71	66	75	28	22	34	49.3	71	28	389	-1362	-4968	6.78115e+07	5.24602e+08	0	0.0351	0.0293	0.0293	TRUE	0.2543	solute carrier family 31, member 2 [Source:MGI Symbol;Acc:MGI:1333844]	4	62262562	62298411	1	Slc31a2	20530
ENSMUSG00000067825	74	61	49	35	30	29	80	60	49	33	28	30	46.77	63	30	483	-1.05	-3699	0.000216345215256729	0.00108908281354724	0	0.0369	34	34	TRUE	0.2513	peroxisomal biogenesis factor 26 [Source:MGI Symbol;Acc:MGI:1921293]	6	121183667	121198837	1	Pex26	74043
ENSMUSG00000068205	67	51	75	24	43	31	73	50	75	23	40	32	48.83	66	32	0.48	-1058	-3703	0.000213294536260132	0.00107550102145982	0.0375	0.0354	0.0357	0.0357	TRUE	0.4143	mono-ADP ribosylhydrolase 2 [Source:MGI Symbol;Acc:MGI:1920149]	2	140395309	142392966	1	Macrod2	72899
ENSMUSG00000068246	101	97	107	59	47	42	109	96	107	56	44	43	75.94	104	48	0.46	-1121	-5132	2.87081e+07	2.34966e+07	0	0.0233	0.0193	0.0193	TRUE	199	apolipoprotein L 9b [Source:MGI Symbol;Acc:MGI:1919148]	15	77729039	77736382	1	Apol9b	71898
ENSMUSG00000068457	1422	1563	1935	155	138	116	1539	1539	1943	148	129	119	902.87	1674	132	79	-3662	-32355	1.18665e-215	1.00523e-212	0.0137	0.0032	0.0053	0.0053	TRUE	239	ubiquitously transcribed tetratricopeptide repeat gene, Y chromosome [Source:MGI Symbol;Acc:MGI:894810]	Y	1096861	1245759	-1	Uty	22290
ENSMUSG00000068699	899	1107	984	172	155	165	973	1090	988	164	145	169	588.28	1017	159	157	-2675	-26274	3.78612e-138	1.86228e-135	0	0.0042	0.0039	0.0039	TRUE	68	filamin C, gamma [Source:MGI Symbol;Acc:MGI:95557]	6	29433256	29461883	1	Flnc	68794
ENSMUSG00000069045	1887	2025	2031	243	229	214	2042	1994	2039	232	214	220	1123.59	2025	222	0.11	-3.19	-39598	0	0	0	0.0029	0.0022	0.0022	TRUE	0.0173	DEAD (Asp-Glu-Ala-Asp) box polypeptide 3, Y-linked [Source:MGI Symbol;Acc:MGI:1349406]	Y	1260771	1286629	-1	Ddx3y	26900
ENSMUSG00000069049	1390	1533	1610	129	123	120	1504	1510	1616	123	115	123	831.99	1543	120	78	-3681	-36702	6.89037e-281	8.75536e-279	0	0.0034	0.0029	0.0029	TRUE	0.0206	eukaryotic translation initiation factor 2, subunit 3, structural gene Y-linked [Source:MGI Symbol;Acc:MGI:1349430]	Y	1010543	1028847	1	Eif2s3y	26908
ENSMUSG00000069308	39	61	44	23	25	17	42	60	44	22	23	17	34.88	49	21	429	-1221	-3769	0.000163587294527917	0.000846125870746838	0	49	42	42	TRUE	334	histone cluster 1, H2bp [Source:MGI Symbol;Acc:MGI:2448409]	13	21787461	21789213	1	Hist1h2bp	319188
ENSMUSG00000069309	90	85	77	51	32	46	97	84	77	49	30	47	64.04	86	42	486	-1.04	-4245	2.18566e+09	0.000132040405483641	0.0157	0.0273	0.0257	0.0257	TRUE	0.5025	histone cluster 1, H2an [Source:MGI Symbol;Acc:MGI:2448300]	13	21786826	21787218	-1	Hist1h2an	319170
ENSMUSG00000070031	17	26	23	8	6	7	18	26	23	8	6	7	14.59	22	7	304	-1.72	-3387	0.000707469600214537	0.00315608439557381	0	0.1151	0.0917	0.0917	TRUE	0.1307	Sp140 nuclear body protein [Source:MGI Symbol;Acc:MGI:3702467]	1	85600378	85645037	1	Sp140	434484
ENSMUSG00000070348	2077	2252	2089	262	247	263	2248	2218	2097	250	231	270	1219.04	2188	250	114	-3129	-39038	0	0	1	0.0028	0.0025	0.0025	TRUE	0.0506	cyclin D1 [Source:MGI Symbol;Acc:MGI:88313]	7	144929931	144939925	-1	Ccnd1	12443
ENSMUSG00000071369	115	133	139	29	18	26	124	131	140	28	17	27	77.7	132	24	0.18	-2477	-10021	1.23347e-09	3.83053e-08	0	0.0228	0.0196	0.0196	TRUE	0.4099	mitogen-activated protein kinase kinase kinase 5 [Source:MGI Symbol;Acc:MGI:1346876]	10	19934472	20142753	1	Map3k5	26408
ENSMUSG00000071657	175	167	170	66	69	63	189	164	171	63	65	65	119.46	175	64	367	-1447	-8162	0.0330483	0.676403	0	0.0153	0.0122	0.0122	TRUE	0.0553	Berardinelli-Seip congenital lipodystrophy 2 (seipin) [Source:MGI Symbol;Acc:MGI:1298392]	19	8837467	8848683	1	Bscl2	14705
ENSMUSG00000072066	26	27	13	2	5	0	28	27	13	2	5	0	12.4	23	2	0.1	-3327	-4592	4.39038e+08	2.99662e+09	191	0.1353	0.1398	0.1398	TRUE	10167	RIKEN cDNA 6720489N17 gene [Source:MGI Symbol;Acc:MGI:2443901]	13	62603013	62624182	-1	6720489N17Rik	211378
ENSMUSG00000072294	71	83	119	8	7	5	77	82	119	8	7	5	49.56	93	7	0.07	-3843	-9577	1.00382e-07	2.83975e-06	0	0.0349	0.0354	0.0354	TRUE	0.6172	Kruppel-like factor 12 [Source:MGI Symbol;Acc:MGI:1333796]	14	99870632	100284679	-1	Klf12	16597
ENSMUSG00000072437	32	35	26	12	18	13	35	34	26	11	17	13	22.81	32	14	438	-1.19	-3026	0.00247854884204997	0.00965336213118211	0	0.0741	0.0605	0.0605	TRUE	0.1661	nanos C2HC-type zinc finger 1 [Source:MGI Symbol;Acc:MGI:2669254]	19	60755987	60759914	1	Nanos1	332397
ENSMUSG00000073490	63	53	66	27	25	20	68	52	66	26	23	21	42.72	62	23	374	-1417	-4.82	1.4354e+08	1.05125e+08	0	0.0402	0.0332	0.0332	TRUE	0.1764	interferon activated gene 207 [Source:MGI Symbol;Acc:MGI:2138302]	1	173723427	173741747	-1	Ifi207	226691
ENSMUSG00000073791	110	121	128	61	67	60	119	119	129	58	63	62	91.54	122	61	498	-1007	-5187	2.13956e+07	1.78078e+08	0	0.0195	15	15	TRUE	0.0206	EF-hand calcium binding domain 7 [Source:MGI Symbol;Acc:MGI:2385199]	4	99829198	99912788	1	Efcab7	230500
ENSMUSG00000073792	78	100	89	25	32	28	84	98	89	24	30	29	59.13	90	28	303	-1723	-6749	149.337	20331.1	0	0.0295	0.0237	0.0237	TRUE	0.0903	asparagine-linked glycosylation 6 (alpha-1,3,-glucosyltransferase) [Source:MGI Symbol;Acc:MGI:2444031]	4	99715664	99763460	1	Alg6	320438
ENSMUSG00000074794	348	409	410	122	144	99	377	403	412	116	135	102	257.31	397	118	297	-1753	-13335	1.45543e-26	8.77168e-26	1	0.0079	7	7	TRUE	168	arrestin domain containing 3 [Source:MGI Symbol;Acc:MGI:2145242]	13	80883384	80896042	1	Arrdc3	105171
ENSMUSG00000074818	40	36	48	18	12	10	43	35	48	17	11	10	27.6	42	13	306	-1711	-4542	5.57745e+08	3.74648e+09	0	0.0615	0.0526	0.0526	TRUE	0.3646	PDZ domain containing 7 [Source:MGI Symbol;Acc:MGI:3608325]	19	45026906	45045717	-1	Pdzd7	100503041
ENSMUSG00000074825	44	45	47	22	28	14	48	44	47	21	26	14	33.45	46	20	445	-1169	-3564	0.000365751697061576	0.00174717477343199	0	51	0.0429	0.0429	TRUE	0.3629	inositol 1,4,5-triphosphate receptor interacting protein-like 1 [Source:MGI Symbol;Acc:MGI:1920588]	2	127138772	127143442	-1	Itpripl1	73338
ENSMUSG00000075256	31	33	45	3	2	4	34	33	45	3	2	4	20.01	37	3	79	-3668	-6195	58266.3	66700.1	0	0.0843	0.0725	0.0725	TRUE	0.2685	ceramide kinase-like [Source:MGI Symbol;Acc:MGI:3037816]	2	79330543	79456785	-1	Cerkl	228094
ENSMUSG00000075602	446	478	451	93	98	65	483	471	453	89	92	67	275.57	469	83	176	-2503	-18263	1.62972e-60	2.64362e-58	0	0.0074	0.0066	0.0066	TRUE	0.2491	lymphocyte antigen 6 complex, locus A [Source:MGI Symbol;Acc:MGI:107527]	15	74994877	74998031	-1	Ly6a	110454
ENSMUSG00000078695	67	79	60	22	36	22	73	78	60	21	34	23	47.97	70	26	368	-1442	-5067	4.04521e+06	3.23957e+08	9	36	0.0323	0.0323	TRUE	476	CDGSH iron sulfur domain 3 [Source:MGI Symbol;Acc:MGI:101788]	11	97685826	97688621	1	Cisd3	217149
ENSMUSG00000078866	94	101	135	49	58	57	102	99	136	47	54	58	82.71	112	53	473	-1.08	-5	5.71981e+07	4.48871e+07	13	0.0215	0.0199	0.0199	TRUE	0.3318	zinc finger protein 970 [Source:MGI Symbol;Acc:MGI:3652255]	2	177464733	177478129	1	Zfp970	628308
ENSMUSG00000078945	27	51	47	5	8	8	29	50	47	5	7	8	24.52	42	7	161	-2637	-5827	564108	5.74201e+06	0	0.0691	0.0641	0.0641	TRUE	0.5307	NLR family, apoptosis inhibitory protein 2 [Source:MGI Symbol;Acc:MGI:1298226]	13	100144063	100202092	-1	Naip2	17948
ENSMUSG00000079018	43	47	39	14	4	2	47	46	39	13	4	2	25.19	44	6	147	-2771	-5.91	341835	3.58234e+06	0.1851	0.0673	0.0714	0.0714	TRUE	2351	lymphocyte antigen 6 complex, locus C1 [Source:MGI Symbol;Acc:MGI:96882]	15	75044018	75048830	-1	Ly6c1	17067
ENSMUSG00000079084	400	489	486	269	235	214	433	482	488	257	220	220	349.79	468	232	496	-1.01	-9181	4.26451e-06	0.000110965	0.0027	0.0062	0.0055	0.0055	TRUE	0.0961	coiled-coil domain containing 82 [Source:MGI Symbol;Acc:MGI:1913646]	9	13246955	13292520	1	Ccdc82	66396
ENSMUSG00000079414	55	71	54	16	17	21	60	70	54	15	16	22	39.4	61	18	286	-1806	-5695	1.23365e+06	1.20427e+07	0	0.0435	0.0364	0.0364	TRUE	189	predicted gene 11110 [Source:MGI Symbol;Acc:MGI:3779362]	17	57091370	57105942	-1	Gm11110	NA
ENSMUSG00000079852	109	152	162	60	53	57	118	150	163	57	50	58	99.28	144	55	383	-1383	-6.88	597.886	8394.63	0	0.0181	0.0168	0.0168	TRUE	0.2435	killer cell lectin-like receptor, subfamily A, member 4 [Source:MGI Symbol;Acc:MGI:101904]	6	130043731	130067271	-1	Klra4	16635
ENSMUSG00000079852	109	152	162	60	53	57	118	150	163	57	50	58	99.28	144	55	383	-1383	-6.88	597.886	8394.63	0	0.0181	0.0168	0.0168	TRUE	0.2435	killer cell lectin-like receptor, subfamily A, member 4 [Source:MGI Symbol;Acc:MGI:101904]	6	130043731	130067271	-1	Klra4	93970
ENSMUSG00000084910	128	144	117	54	53	39	139	142	117	52	50	40	89.83	133	47	356	-1491	-7184	67.7188	1060.14	0	0.0199	0.0169	0.0169	TRUE	131	RIKEN cDNA C630043F03 gene [Source:MGI Symbol;Acc:MGI:1915535]	4	72201348	72215352	1	C630043F03Rik	NA
ENSMUSG00000084968	82	109	100	40	38	38	89	107	100	38	36	39	68.2	99	38	0.38	-1398	-6034	159842	1.7409e+06	0	0.0257	0.0206	0.0206	TRUE	0.0751	predicted gene 12743 [Source:MGI Symbol;Acc:MGI:3651449]	4	108592425	108619849	-1	Gm12743	NA
ENSMUSG00000085084	18	21	13	5	8	1	19	21	13	5	7	1	11.08	18	4	253	-1981	-3.19	0.00142201395144436	0.00589849530240033	0.0407	0.1511	141	141	TRUE	0.7778	RIKEN cDNA 4930570G19 gene [Source:MGI Symbol;Acc:MGI:1923158]	3	156546753	156561746	-1	4930570G19Rik	NA
ENSMUSG00000085207	22	27	38	8	15	8	24	27	38	8	14	8	19.74	30	10	338	-1564	-3516	0.000438849965564146	0.00205074602357404	0	0.0855	0.0767	0.0767	TRUE	0.4779	predicted gene 11767 [Source:MGI Symbol;Acc:MGI:3650674]	11	119935803	119942698	-1	Gm11767	NA
ENSMUSG00000085289	74	87	112	37	48	52	80	86	112	35	45	53	68.64	93	44	479	-1063	-4439	9.05307e+08	5.84425e+09	0.0213	0.0256	0.0249	0.0249	TRUE	0.3336	predicted gene 15337 [Source:MGI Symbol;Acc:MGI:3705103]	18	39367038	39389425	-1	Gm15337	NA
ENSMUSG00000085654	9	8	11	0	1	0	10	8	11	0	1	0	4.93	10	0	36	-4778	-3509	0.000450579075715476	0.00209976459245403	0	0.3377	0.2832	0.2832	TRUE	0.3923	predicted gene 12536 [Source:MGI Symbol;Acc:MGI:3650719]	4	57300096	57307305	1	Gm12536	NA
ENSMUSG00000085897	51	31	64	23	15	26	55	31	64	22	14	27	35.44	50	21	417	-1263	-3588	0.000333189708856016	0.00160927357638155	0.0916	0.0482	0.0557	0.0557	TRUE	0.4631	predicted gene 11604 [Source:MGI Symbol;Acc:MGI:3651795]	11	98185366	98186107	1	Gm11604	NA
ENSMUSG00000085976	28	43	55	23	20	15	30	42	55	22	19	15	30.66	42	19	438	-1.19	-3371	0.000749171881065941	0.00332848859047013	36	0.0555	0.0519	0.0519	TRUE	0.1062	predicted gene 13816 [Source:MGI Symbol;Acc:MGI:3649317]	2	92742230	92759208	1	Gm13816	NA
ENSMUSG00000086035	66	75	87	35	30	29	71	74	87	33	28	30	53.98	77	30	392	-1351	-5207	1.91716e+07	1.60532e+08	0	0.0321	26	26	TRUE	0.1134	predicted gene 12610 [Source:MGI Symbol;Acc:MGI:3652143]	4	89421848	89463487	1	Gm12610	NA
ENSMUSG00000086150	31	33	41	12	18	16	34	33	41	11	17	16	25.32	36	15	417	-1263	-3369	0.00075536160060487	0.00335501126886777	0	0.0669	0.0544	0.0544	TRUE	0.1963	BTB and CNC homology 2, opposite strand [Source:MGI Symbol;Acc:MGI:3041246]	4	32559680	32571708	-1	Bach2os	NA
ENSMUSG00000086644	23	20	40	8	8	5	25	20	40	8	7	5	17.5	28	7	0.24	-2.06	-4123	3.73391e+09	0.000217390951801794	0	0.0962	0.0901	0.0901	TRUE	0.4249	predicted gene 13470 [Source:MGI Symbol;Acc:MGI:3649387]	2	46419535	46442710	-1	Gm13470	NA
ENSMUSG00000086782	42	55	41	17	12	6	45	54	41	16	11	6	29.07	47	11	0.24	-2058	-5331	9.78852e+06	8.58777e+07	0.0091	0.0585	0.0534	0.0534	TRUE	0.5906	RIKEN cDNA E130102H24 gene [Source:MGI Symbol;Acc:MGI:1925116]	4	101346531	101356735	-1	E130102H24Rik	NA
ENSMUSG00000087132	35	37	46	18	14	19	38	36	46	17	13	19	28.38	40	16	412	-1.28	-3603	0.000313971671674992	0.00152664797656375	0	0.0599	0.0489	0.0489	TRUE	0.1744	RIKEN cDNA A930001C03 gene [Source:MGI Symbol;Acc:MGI:2441838]	19	4439003	4448973	1	A930001C03Rik	NA
ENSMUSG00000087366	77	98	125	19	19	23	83	97	125	18	18	24	60.81	102	20	194	-2366	-8387	0.00498344	0.108399	0	0.0287	0.0278	0.0278	TRUE	0.2278	jun proto-oncogene, opposite strand [Source:MGI Symbol;Acc:MGI:2652837]	4	95051534	95167318	1	Junos	NA
ENSMUSG00000087475	43	45	49	22	18	23	47	44	49	21	17	24	33.58	47	21	438	-1192	-3699	0.000216744082510258	0.00109001113790119	0	0.0508	0.0402	0.0402	TRUE	0.1395	RIKEN cDNA 4933406I18 gene [Source:MGI Symbol;Acc:MGI:1918295]	7	114315479	114415161	-1	4933406I18Rik	NA
ENSMUSG00000092094	11	24	37	6	10	8	12	24	37	6	9	8	16	24	8	319	-1647	-3.16	0.00157886261049843	0.0064629522375517	0.1428	0.1051	0.1121	0.1121	TRUE	0.0981	zinc finger protein 804B [Source:MGI Symbol;Acc:MGI:2685287]	5	6769010	7344756	-1	Zfp804b	207618
ENSMUSG00000094377	79	87	112	40	34	69	86	86	112	38	32	71	70.74	95	47	493	-1019	-3898	9.69122e+09	0.000520873204176922	0.0805	0.0249	0.0334	0.0334	TRUE	15498	predicted gene, 24407 [Source:MGI Symbol;Acc:MGI:5454184]	5	115490254	115490394	1	Gm24407	NA
ENSMUSG00000095134	46	57	43	8	9	5	50	56	43	8	8	5	28.38	50	7	143	-2807	-6647	2989.54	39432.9	0	0.0599	0.0499	0.0499	TRUE	0.1263	midline 1, pseudogene 1 [Source:MGI Symbol;Acc:MGI:5780070]	Y	90753057	90763485	1	Mid1-ps1	NA
ENSMUSG00000095562	291	301	357	48	53	42	315	296	358	46	50	43	184.72	323	46	143	-2806	-16275	1.4785e-45	1.62188e-43	0	0.0104	0.0093	0.0093	TRUE	0.1038	erythroid differentiation regulator 1 [Source:MGI Symbol;Acc:MGI:2384747]	X	170009659	170019281	1	Erdr1	NA
ENSMUSG00000096206	164	116	93	27	52	58	177	114	93	26	49	60	86.51	128	45	348	-1524	-3518	0.00043545218326617	0.00203736572275009	0.1204	0.0206	0.0369	0.1204	TRUE	0.5231	predicted gene, 22317 [Source:MGI Symbol;Acc:MGI:5452094]	12	54738459	54738622	-1	Gm22317	NA
ENSMUSG00000096472	99	105	97	42	43	41	107	103	97	40	40	42	71.72	102	41	397	-1331	-5973	232347	2.48795e+06	0	0.0245	0.0189	0.0189	TRUE	0.0198	cyclin dependent kinase inhibitor 2D [Source:MGI Symbol;Acc:MGI:105387]	9	21288410	21291407	-1	Cdkn2d	12581
ENSMUSG00000096768	2751	3375	4043	424	496	388	2977	3324	4059	405	464	398	1937.91	3453	422	122	-3031	-20452	5.71556e-79	1.34078e-76	0.0145	0.0023	0.0052	0.0145	TRUE	0.1775	predicted gene, 47283 [Source:MGI Symbol;Acc:MGI:6096131]	Y	90784738	90816465	1	Gm47283	NA
ENSMUSG00000097015	30	25	33	8	5	6	32	25	33	8	5	6	18.12	30	6	205	-2288	-4.68	2.87315e+08	2.01703e+09	0	93	0.0763	0.0763	TRUE	0.1719	predicted gene, 26705 [Source:MGI Symbol;Acc:MGI:5477199]	7	99260481	99267218	-1	Gm26705	NA
ENSMUSG00000097040	53	68	102	6	2	2	57	67	102	6	2	2	39.4	75	3	43	-4549	-8.52	0.0016022	0.0361931	0.0829	0.0435	0.0485	0.0485	TRUE	0.5871	RIKEN cDNA 2610316D01 gene [Source:MGI Symbol;Acc:MGI:1919761]	3	45280437	45378260	-1	2610316D01Rik	NA
ENSMUSG00000097248	15	19	22	2	0	0	16	19	22	2	0	0	9.82	19	1	34	-4.88	-4308	1.64496e+09	0.000101548262449256	0	0.1703	0.1467	0.1467	TRUE	0.9736	predicted gene 2694 [Source:MGI Symbol;Acc:MGI:3780864]	8	87460469	87525554	1	Gm2694	NA
ENSMUSG00000097327	5	6	10	0	0	1	5	6	10	0	0	1	3.73	7	0	49	-4357	-3065	0.00217314009701969	0.00857336098301583	0	0.4461	0.3839	0.3839	TRUE	0.4764	RIKEN cDNA E030030I06 gene [Source:MGI Symbol;Acc:MGI:2442914]	10	22113050	22149270	-1	E030030I06Rik	319887
ENSMUSG00000097439	13	15	13	4	2	4	14	15	13	4	2	4	8.61	14	3	232	-2105	-3066	0.00216800216291675	0.00855751928039206	0	194	0.1536	0.1536	TRUE	0.2145	predicted gene, 16754 [Source:MGI Symbol;Acc:MGI:4439678]	9	21225371	21233046	1	Gm16754	NA
ENSMUSG00000099871	5	9	11	0	0	1	5	9	11	0	0	1	4.39	8	0	41	-4604	-3315	0.000917108018478436	0.00398292881394451	0	0.3793	0.3296	0.3296	TRUE	0.4416	predicted gene, 21742 [Source:MGI Symbol;Acc:MGI:5433906]	Y	90837413	90844040	1	Gm21742	NA
ENSMUSG00000099876	55	72	57	3	6	10	60	71	57	3	6	10	34.4	63	6	99	-3343	-7819	0.530442	9.85162	0.0002	0.0496	0.0448	0.0448	TRUE	0.7345	predicted gene 29650 [Source:MGI Symbol;Acc:MGI:5580356]	Y	1048393	1049134	1	Gm29650	NA
ENSMUSG00000100975	36	50	59	7	8	11	39	49	59	7	7	11	28.82	49	8	171	-2545	-6227	47461.1	548663	0	59	0.0524	0.0524	TRUE	0.1197	predicted gene 28875 [Source:MGI Symbol;Acc:MGI:5579581]	12	104925501	104926689	-1	Gm28875	NA
ENSMUSG00000103921	37	34	48	13	19	12	40	33	48	12	18	12	27.37	40	14	0.35	-1514	-4075	4.59701e+09	0.000262038092319625	0	62	0.0526	0.0526	TRUE	0.1694	predicted gene 5841 [Source:MGI Symbol;Acc:MGI:3645248]	3	8327531	8329707	1	Gm5841	NA
ENSMUSG00000105265	91	68	78	40	44	35	98	67	78	38	41	36	59.84	81	38	474	-1076	-4316	1.59137e+09	9.86792e+09	0	0.0291	0.0259	0.0259	TRUE	0.2381	SOX2 overlapping transcript (non-protein coding) [Source:MGI Symbol;Acc:MGI:2444112]	3	34104270	34682619	1	Sox2ot	NA
ENSMUSG00000106990	63	60	41	10	16	14	68	59	41	10	15	14	34.55	56	13	231	-2114	-5878	414930	4.30692e+06	0	0.0494	0.0466	0.0466	TRUE	0.2055	predicted gene 42547 [Source:MGI Symbol;Acc:MGI:5662684]	6	28211008	28214805	-1	Gm42547	NA
ENSMUSG00000110427	5	4	5	0	0	0	5	4	5	0	0	0	2.4	5	0	37	-4743	-3.08	0.00206712979107368	0.00819968653857739	0	0.6941	0.6017	0.6017	TRUE	71	RIKEN cDNA 4933406B17 gene [Source:MGI Symbol;Acc:MGI:1918290]	8	95496430	95503718	1	4933406B17Rik	NA
ENSMUSG00000113019	11	16	12	4	2	0	12	16	12	4	2	0	7.57	13	2	146	-2.78	-3394	0.000688475393495886	0.00308126586440425	0	0.2207	0.1932	0.1932	TRUE	0.6888	predicted gene, 47467 [Source:MGI Symbol;Acc:MGI:6096433]	13	74509598	74522461	-1	Gm47467	NA
ENSMUSG00000115009	46	64	73	27	27	25	50	63	73	26	25	26	43.8	62	26	411	-1282	-4421	9.83308e+08	6.30243e+09	0	0.0393	0.0333	0.0333	TRUE	134	RIKEN cDNA G930009F23 gene [Source:MGI Symbol;Acc:MGI:3642701]	15	38436225	38455134	-1	G930009F23Rik	NA
ENSMUSG00000115388	36	39	49	14	10	12	39	38	49	13	9	12	26.93	42	11	276	-1856	-4854	1.20738e+08	9.01577e+07	0	63	0.0516	0.0516	TRUE	0.1631	epiplakin 1 [Source:MGI Symbol;Acc:MGI:2386306]	15	76101481	76120195	-1	Eppk1	223650
ENSMUSG00000116004	7	3	7	0	0	0	8	3	7	0	0	0	2.93	6	0	31	-5.03	-3366	0.000762275818808537	0.00337981438941337	0	0.5683	0.5215	0.5215	TRUE	0.4466	predicted gene, 49539 [Source:MGI Symbol;Acc:MGI:6155241]	15	85646083	85667675	1	Gm49539	NA

## Sheet: E-UP
Ensembl.Gene.ID	GFP1	GFP2	GFP3	E1	E2	E3	norm.GFP1	norm.GFP2	norm.GFP3	norm.E1	norm.E2	norm.E3	baseMean	GFP	E	FoldChange	log2FoldChange	stat	pvalue	padj	dispGeneEst	dispFit	dispMAP	dispersion	betaConv	maxCooks	Gene.description	Chromosome.scaffold.name	Gene.start..bp.	Gene.end..bp.	Strand	Gene.name	EntrezID
ENSMUSG00000000078	856	911	904	1601	1741	1585	926	897	908	1528	1630	1626	1252.52	910	1595	1752	809	12546	4.20031e-22	2.16373e-20	0	0.0027	0.0021	0.0021	TRUE	0.0163	Kruppel-like factor 6 [Source:MGI Symbol;Acc:MGI:1346318]	13	5861482	5870394	1	Klf6	23849
ENSMUSG00000000275	2	3	4	76	63	59	2	3	4	73	59	61	33.53	3	64	20898	4385	7983	0.142281	2.78498	0	0.0509	43	43	TRUE	0.1214	tripartite motif-containing 25 [Source:MGI Symbol;Acc:MGI:102749]	11	88999376	89020293	1	Trim25	217069
ENSMUSG00000000276	57	57	56	154	153	148	62	56	56	147	143	152	102.68	58	147	2542	1346	7132	98.7656	1528.91	0	0.0176	0.0135	0.0135	TRUE	0.0249	diacylglycerol kinase, epsilon [Source:MGI Symbol;Acc:MGI:1889276]	11	89035179	89066850	-1	Dgke	56077
ENSMUSG00000000296	65	52	80	200	200	157	70	51	80	191	187	161	123.51	67	180	2676	1.42	7643	0.0211786	37.2899	0.0129	0.0148	0.0146	0.0146	TRUE	0.4037	tumor protein D52-like 1 [Source:MGI Symbol;Acc:MGI:1298386]	10	31332376	31445958	-1	Tpd52l1	21987
ENSMUSG00000000317	6	6	9	111	126	102	6	6	9	106	118	105	58.33	7	110	15316	3937	10534	6.03811e-12	2.10685e-10	0	0.0299	0.0248	0.0248	TRUE	0.1486	B cell CLL/lymphoma 6, member B [Source:MGI Symbol;Acc:MGI:1278332]	11	70224128	70229798	-1	Bcl6b	12029
ENSMUSG00000000340	105	112	107	245	283	251	114	110	107	234	265	258	181.27	110	252	2283	1191	8.26	0.0145839	0.304624	0	0.0106	0.0084	0.0084	TRUE	0.0456	dihydrolipoamide branched chain transacylase E2 [Source:MGI Symbol;Acc:MGI:105386]	3	116513070	116549981	1	Dbt	13171
ENSMUSG00000000489	411	440	439	740	759	705	445	433	441	706	711	723	576.49	440	713	1623	698	8389	0.0048853	0.106416	0	0.0043	0.0031	0.0031	TRUE	0.0018	platelet derived growth factor, B polypeptide [Source:MGI Symbol;Acc:MGI:97528]	15	79995874	80014977	-1	Pdgfb	18591
ENSMUSG00000000555	951	1105	1070	2306	2338	2167	1029	1088	1074	2200	2189	2224	1634.08	1064	2204	2071	1.05	17899	1.20621e-57	1.85781e-55	0	0.0024	0.0018	0.0018	TRUE	0.0095	integrin alpha 5 (fibronectin receptor alpha) [Source:MGI Symbol;Acc:MGI:96604]	15	103344286	103366763	-1	Itga5	16402
ENSMUSG00000000753	510	577	550	1550	1525	1269	552	568	552	1479	1428	1302	980.2	557	1403	2517	1332	17727	2.57985e-56	3.71109e-54	0.0019	0.0031	0.0028	0.0028	TRUE	0.0469	serine (or cysteine) peptidase inhibitor, clade F, member 1 [Source:MGI Symbol;Acc:MGI:108080]	11	75409769	75422701	-1	Serpinf1	20317
ENSMUSG00000001098	1076	1148	1060	1907	1970	1810	1165	1131	1064	1820	1844	1857	1480.08	1120	1840	1644	717	11687	1.48425e-17	6.57902e-16	0	0.0025	2	2	TRUE	0.0226	potassium channel tetramerisation domain containing 10 [Source:MGI Symbol;Acc:MGI:2141207]	5	114363567	114380508	-1	Kctd10	330171
ENSMUSG00000001105	137	153	126	236	224	206	148	151	127	225	210	211	178.62	142	215	1.52	604	4244	2.19194e+09	0.000132314986787798	0	0.0107	0.0087	0.0087	TRUE	94	intraflagellar transport 20 [Source:MGI Symbol;Acc:MGI:1915585]	11	78536361	78541737	1	Ift20	55978
ENSMUSG00000001119	123	167	146	932	981	895	133	164	147	889	918	918	528.37	148	908	6124	2615	25153	1.29448e-125	5.48285e-123	0	0.0045	0.0038	0.0038	TRUE	0.0994	collagen, type VI, alpha 1 [Source:MGI Symbol;Acc:MGI:88459]	10	76708792	76726168	-1	Col6a1	12833
ENSMUSG00000001305	221	264	249	400	417	428	239	260	250	382	390	439	326.73	250	404	1615	691	6276	34790.9	409963	0	0.0065	0.0055	0.0055	TRUE	0.0668	ribosomal RNA processing 15 homolog (S. cerevisiae) [Source:MGI Symbol;Acc:MGI:1914473]	1	186720978	186749358	-1	Rrp15	67223
ENSMUSG00000001333	32	24	43	118	116	124	35	24	43	113	109	127	74.98	34	116	3437	1781	7436	10.3503	171.732	8	0.0235	22	22	TRUE	0.5096	syncoilin [Source:MGI Symbol;Acc:MGI:1916078]	4	129287617	129308559	1	Sync	68828
ENSMUSG00000001349	0	0	0	13	8	7	0	0	0	12	7	7	4.51	0	9	48017	5585	4034	5.48463e+09	0.00030768798324598	0	369	0.3279	0.3279	TRUE	0.3617	calponin 1 [Source:MGI Symbol;Acc:MGI:104979]	9	22099216	22109630	1	Cnn1	12797
ENSMUSG00000001436	346	405	410	589	674	593	374	399	412	562	631	608	497.74	395	600	1519	604	6553	5637.25	71571	0	0.0047	4	4	TRUE	0.0374	solute carrier family 19 (folate transporter), member 1 [Source:MGI Symbol;Acc:MGI:103182]	10	77032241	77061002	1	Slc19a1	20509
ENSMUSG00000001467	1015	1070	1063	2116	2181	1985	1099	1054	1067	2019	2042	2037	1552.87	1073	2033	1894	922	15665	2.6378e-41	2.59491e-39	0	0.0025	0.0018	0.0018	TRUE	5	cytochrome P450, family 51 [Source:MGI Symbol;Acc:MGI:106040]	5	4081145	4104746	-1	Cyp51	13121
ENSMUSG00000001506	51477	60908	54375	151241	149491	120860	55714	59985	54592	144316	139944	124014	96427.56	56764	136091	2398	1262	22426	2.17141e-97	7.0446e-95	0.0043	0.0014	0.0023	0.0023	TRUE	0.0738	collagen, type I, alpha 1 [Source:MGI Symbol;Acc:MGI:88467]	11	94936224	94953042	1	Col1a1	12842
ENSMUSG00000001510	1	1	1	74	70	84	1	1	1	71	66	86	37.57	1	74	72425	6178	7094	130.26	2000.21	0	0.0456	0.0401	0.0401	TRUE	183	distal-less homeobox 3 [Source:MGI Symbol;Acc:MGI:94903]	11	95120119	95125296	1	Dlx3	13393
ENSMUSG00000001555	23	30	44	1454	1361	1194	25	30	44	1387	1274	1225	664.21	33	1295	39236	5294	31923	1.26794e-209	9.66678e-207	0.0046	0.0039	4	4	TRUE	0.6268	FK506 binding protein 10 [Source:MGI Symbol;Acc:MGI:104769]	11	100415697	100424824	1	Fkbp10	14230
ENSMUSG00000001802	2	2	0	23	17	14	2	2	0	22	16	14	9.39	1	17	12765	3674	4183	2.88033e+09	0.000170825903907076	0	178	0.1538	0.1538	TRUE	0.4984	low density lipoprotein receptor-related protein 3 [Source:MGI Symbol;Acc:MGI:3584516]	7	35200027	35215498	-1	Lrp3	435965
ENSMUSG00000001864	57	73	59	162	195	132	62	72	59	155	183	135	110.9	64	158	2452	1294	6777	1227.85	16836.5	0.0102	0.0164	0.0152	0.0152	TRUE	0.1645	allograft inflammatory factor 1-like [Source:MGI Symbol;Acc:MGI:1919598]	2	31950139	31973442	1	Aif1l	108897
ENSMUSG00000001870	2260	2524	2623	4987	5054	4247	2446	2486	2633	4759	4731	4358	3568.83	2522	4616	1831	872	16044	6.29949e-44	6.57909e-42	0.0015	0.0019	0.0018	0.0018	TRUE	29	latent transforming growth factor beta binding protein 1 [Source:MGI Symbol;Acc:MGI:109151]	17	75005568	75392512	1	Ltbp1	268977
ENSMUSG00000002504	11	8	12	48	36	37	12	8	12	46	34	38	24.88	11	39	3701	1888	4679	2.88194e+08	2.02226e+09	0	0.0681	0.0566	0.0566	TRUE	0.1925	solute carrier family 9 (sodium/hydrogen exchanger), member 3 regulator 2 [Source:MGI Symbol;Acc:MGI:1890662]	17	24639286	24650327	-1	Slc9a3r2	65962
ENSMUSG00000002603	185	202	171	380	316	289	200	199	172	363	296	297	254.3	190	319	1674	743	5748	900459	8.93312e+06	0.0074	0.0079	0.0078	0.0078	TRUE	0.1695	transforming growth factor, beta 1 [Source:MGI Symbol;Acc:MGI:98725]	7	25687002	25705077	1	Tgfb1	21803
ENSMUSG00000002732	49	70	64	131	142	122	53	69	64	125	133	125	94.89	62	128	2053	1038	5334	9.60402e+06	8.44534e+07	0	0.0189	0.0153	0.0153	TRUE	0.1342	FK506 binding protein 7 [Source:MGI Symbol;Acc:MGI:1336879]	2	76663044	76673116	-1	Fkbp7	14231
ENSMUSG00000002845	340	354	356	617	648	525	368	349	357	589	607	539	468.02	358	578	1616	692	7.38	15.831	25.9003	0	5	0.0041	0.0041	TRUE	0.0409	transmembrane protein 39a [Source:MGI Symbol;Acc:MGI:1915096]	16	38558698	38592162	1	Tmem39a	67846
ENSMUSG00000002983	129	146	140	236	250	217	140	144	141	225	234	223	184.31	142	227	1608	686	4989	6.05766e+07	4.73678e+07	0	0.0104	0.0079	0.0079	TRUE	0.0075	avian reticuloendotheliosis viral (v-rel) oncogene related B [Source:MGI Symbol;Acc:MGI:103289]	7	19606217	19629438	-1	Relb	19698
ENSMUSG00000003161	484	526	504	823	831	786	524	518	506	785	778	807	652.94	516	790	1531	614	7751	0.9128	16.5892	0	0.0039	0.0029	0.0029	TRUE	0.0039	sorcin [Source:MGI Symbol;Acc:MGI:98419]	5	8046078	8069379	1	Sri	109552
ENSMUSG00000003283	16	5	7	28	28	31	17	5	7	27	26	32	19	10	28	2929	1.55	3318	0.000906569845473728	0.00394165298083359	0.0699	0.0887	87	87	TRUE	14702	hemopoietic cell kinase [Source:MGI Symbol;Acc:MGI:96052]	2	153108468	153151441	1	Hck	15162
ENSMUSG00000003464	268	289	280	585	561	531	290	285	281	558	525	545	414.01	285	543	1903	928	9556	1.22635e-08	3.43739e-06	0	0.0054	0.0041	0.0041	TRUE	0.0096	peroxisomal biogenesis factor 19 [Source:MGI Symbol;Acc:MGI:1334458]	1	172126755	172136493	1	Pex19	19298
ENSMUSG00000003528	428	540	464	752	837	706	463	532	466	718	784	724	614.41	487	742	1523	607	6962	336.581	4883.15	0.0024	0.0041	0.0038	0.0038	TRUE	0.0766	solute carrier family 25 (mitochondrial carrier, citrate transporter), member 1 [Source:MGI Symbol;Acc:MGI:1345283]	16	17925223	17928219	-1	Slc25a1	13358
ENSMUSG00000003814	2673	2731	2685	5544	5567	4981	2893	2690	2696	5290	5211	5111	3981.83	2760	5204	1887	916	18.46	4.31723e-62	7.23397e-60	0.0006	0.0018	0.0015	0.0015	TRUE	0.0215	calreticulin [Source:MGI Symbol;Acc:MGI:88252]	8	84841850	84846934	-1	Calr	12317
ENSMUSG00000004460	412	448	449	869	826	783	446	441	451	829	773	803	623.97	446	802	1798	847	10309	6.4274e-11	2.13054e-09	0	0.0041	0.0031	0.0031	TRUE	0.0119	DnaJ heat shock protein family (Hsp40) member B11 [Source:MGI Symbol;Acc:MGI:1915088]	16	22857845	22879634	1	Dnajb11	67838
ENSMUSG00000004665	1439	1571	1421	3128	3273	3025	1557	1547	1427	2985	3064	3104	2280.67	1510	3051	2.02	1014	18031	1.12201e-58	1.78213e-57	0.0006	0.0021	0.0018	0.0018	TRUE	0.0285	calponin 2 [Source:MGI Symbol;Acc:MGI:105093]	10	79988584	79996062	1	Cnn2	12798
ENSMUSG00000004698	96	102	110	323	370	265	104	100	110	308	346	272	206.88	105	309	2946	1559	10707	9.48695e-13	3.49413e-11	0	0.0094	0.0088	0.0088	TRUE	91	histone deacetylase 9 [Source:MGI Symbol;Acc:MGI:1931221]	12	34047580	34917095	-1	Hdac9	79221
ENSMUSG00000004952	83	70	81	211	197	219	90	69	81	201	184	225	141.76	80	203	2546	1348	7981	0.145672	2.84405	0.0051	0.0131	0.0118	0.0118	TRUE	0.1395	RAS p21 protein activator 4 [Source:MGI Symbol;Acc:MGI:1858600]	5	136083916	136111860	1	Rasa4	54153
ENSMUSG00000005103	1803	1915	1820	3161	3347	3158	1951	1886	1827	3016	3133	3240	2509.1	1888	3130	1658	729	13338	1.39871e-26	8.4633e-25	0.0008	0.0021	0.0017	0.0017	TRUE	0.0123	WD repeat domain 1 [Source:MGI Symbol;Acc:MGI:1337100]	5	38526813	38563221	-1	Wdr1	22388
ENSMUSG00000005124	1007	1170	1125	3650	3925	3207	1090	1152	1129	3483	3674	3291	2303.26	1124	3483	3099	1632	27125	5.01673e-148	2.83315e-145	0.0017	0.0021	2	2	TRUE	0.0282	cellular communication network factor 4 [Source:MGI Symbol;Acc:MGI:1197008]	15	66891320	66923201	1	Ccn4	22402
ENSMUSG00000005148	85	97	89	185	193	193	92	96	89	177	181	198	138.69	92	185	2004	1003	6234	45597.4	528320	0	0.0134	0.0105	0.0105	TRUE	0.0396	Kruppel-like factor 5 [Source:MGI Symbol;Acc:MGI:1338056]	14	99298691	99315036	1	Klf5	12224
ENSMUSG00000005360	8	15	16	62	58	46	9	15	16	59	54	47	33.36	13	53	4047	2017	5675	138685	1.34265e+07	0	0.0511	0.0434	0.0434	TRUE	0.3435	solute carrier family 1 (glial high affinity glutamate transporter), member 3 [Source:MGI Symbol;Acc:MGI:99917]	15	8634124	8710764	-1	Slc1a3	20512
ENSMUSG00000005397	34	46	47	177	185	145	37	45	47	169	173	149	103.36	43	164	3.79	1922	9516	1.80022e-07	4.99997e-06	0	0.0175	0.0146	0.0146	TRUE	0.1181	nidogen 1 [Source:MGI Symbol;Acc:MGI:97342]	13	13437551	13512269	1	Nid1	18073
ENSMUSG00000005447	18	12	13	40	53	46	19	12	13	38	50	47	29.89	15	45	3.06	1613	4473	7.70311e+08	5.04107e+09	0	0.0569	0.0482	0.0482	TRUE	326	platelet-activating factor acetylhydrolase, isoform 1b, subunit 3 [Source:MGI Symbol;Acc:MGI:108414]	7	25295049	25297986	-1	Pafah1b3	18476
ENSMUSG00000005674	141	169	136	247	239	221	153	166	137	236	224	227	190.3	152	229	1506	591	4273	1.92452e+09	0.000117146283226381	0	0.0101	0.0083	0.0083	TRUE	0.0836	translocase of outer mitochondrial membrane 40-like [Source:MGI Symbol;Acc:MGI:3589112]	1	171216011	171222514	-1	Tomm40l	641376
ENSMUSG00000005950	4	3	7	21	15	20	4	3	7	20	14	21	11.49	5	18	3.81	1.93	3238	0.00120569820376882	0.00509406655889915	0	0.1459	0.1222	0.1222	TRUE	0.3434	purinergic receptor P2X, ligand-gated ion channel, 5 [Source:MGI Symbol;Acc:MGI:2137026]	11	73160421	73172685	1	P2rx5	94045
ENSMUSG00000005968	101	99	122	232	249	220	109	98	122	221	233	226	168.25	110	227	2066	1047	7017	226.523	3356.67	0	0.0113	0.0092	0.0092	TRUE	105	tuftelin 1 [Source:MGI Symbol;Acc:MGI:109572]	3	94612757	94658872	-1	Tuft1	22156
ENSMUSG00000006221	4	2	3	27	23	11	4	2	3	26	22	11	11.32	3	20	6365	2.67	3961	7.46274e+09	0.000408002478229144	0	148	0.1365	0.1365	TRUE	262	heat shock protein family, member 7 (cardiovascular) [Source:MGI Symbol;Acc:MGI:1352494]	4	141420779	141425311	1	Hspb7	29818
ENSMUSG00000006403	30	35	37	139	120	94	32	34	37	133	112	96	74.25	34	114	3281	1714	7276	34.4897	552.414	0	0.0238	21	21	TRUE	0.1158	a disintegrin-like and metallopeptidase (reprolysin type) with thrombospondin type 1 motif, 4 [Source:MGI Symbol;Acc:MGI:1339949]	1	171250421	171260637	1	Adamts4	240913
ENSMUSG00000006412	257	233	245	435	383	439	278	229	246	415	359	450	329.61	251	408	1625	0.7	5928	307469	3.24001e+06	0.0085	0.0064	0.0068	0.0068	TRUE	0.1313	prefoldin 2 [Source:MGI Symbol;Acc:MGI:1276111]	1	171345670	171359254	1	Pfdn2	18637
ENSMUSG00000006586	199	253	239	556	660	538	215	249	240	531	618	552	400.82	235	567	2412	1.27	11905	1.11476e-18	5.08918e-17	0.0036	0.0055	0.0052	0.0052	TRUE	0.0738	RUNX1 translocation partner 1 [Source:MGI Symbol;Acc:MGI:104793]	4	13743436	13893649	1	Runx1t1	12395
ENSMUSG00000006638	91	88	116	172	157	142	98	87	116	164	147	146	126.4	100	152	1515	599	3508	0.000450898916651969	0.00210061310146936	0.0032	0.0145	0.0128	0.0128	TRUE	0.1918	abhydrolase domain containing 1 [Source:MGI Symbol;Acc:MGI:1931013]	5	30950066	30955091	1	Abhd1	57742
ENSMUSG00000006731	39	52	45	166	157	115	42	51	45	158	147	118	93.66	46	141	3053	1.61	7665	1.79327	31.6845	0	0.0191	0.0173	0.0173	TRUE	209	beta-1,4-N-acetyl-galactosaminyl transferase 1 [Source:MGI Symbol;Acc:MGI:1342057]	10	127165225	127172330	1	B4galnt1	14421
ENSMUSG00000006736	481	571	508	862	912	747	521	562	510	823	854	766	672.62	531	814	1534	617	7467	8.18562	137.008	0.0014	0.0039	0.0034	0.0034	TRUE	0.0318	tetraspanin 31 [Source:MGI Symbol;Acc:MGI:1914375]	10	127067280	127070264	-1	Tspan31	67125
ENSMUSG00000006931	61	65	80	548	562	504	66	64	80	523	526	517	296.09	70	522	7441	2896	20813	3.27913e-82	8.19675e-80	0	7	0.0057	0.0057	TRUE	0.1485	prolyl 3-hydroxylase family member 4 (non-enzymatic) [Source:MGI Symbol;Acc:MGI:1913430]	11	100408456	100414836	-1	P3h4	66180
ENSMUSG00000007872	223	238	220	616	563	523	241	234	221	588	527	537	391.35	232	551	2372	1246	11991	3.96239e-19	1.85333e-17	0	0.0056	0.0047	0.0047	TRUE	0.0415	inhibitor of DNA binding 3 [Source:MGI Symbol;Acc:MGI:96398]	4	136143497	136145755	1	Id3	15903
ENSMUSG00000008090	95	114	106	196	189	195	103	112	106	187	177	200	147.59	107	188	1752	809	5.22	1.79126e+07	1.50569e+08	0	0.0126	0.01	0.01	TRUE	0.0335	fibroblast growth factor receptor-like 1 [Source:MGI Symbol;Acc:MGI:2150920]	5	108692382	108706924	1	Fgfrl1	116701
ENSMUSG00000008136	204	239	238	461	443	410	221	235	239	440	415	421	328.4	232	425	1834	875	8131	0.0424852	0.856898	0	0.0065	5	5	TRUE	0.0181	four and a half LIM domains 2 [Source:MGI Symbol;Acc:MGI:1338762]	1	43123074	43196984	-1	Fhl2	14200
ENSMUSG00000008475	1122	1088	1092	2514	2414	2421	1214	1072	1096	2399	2260	2484	1754.19	1127	2381	2113	1079	16559	1.38509e-47	1.6122e-45	0.0024	0.0024	0.0024	0.0024	TRUE	0.0537	actin related protein 2/3 complex, subunit 5 [Source:MGI Symbol;Acc:MGI:1915021]	1	152766542	152775597	1	Arpc5	67771
ENSMUSG00000009739	22	27	24	91	102	78	24	27	24	87	95	80	56.14	25	87	3521	1816	6838	804.182	11167.7	0	31	0.0247	0.0247	TRUE	0.0626	POU domain, class 6, transcription factor 1 [Source:MGI Symbol;Acc:MGI:102935]	15	100575318	100599984	-1	Pou6f1	19009
ENSMUSG00000009772	121	162	172	295	339	247	131	160	173	281	317	253	219.25	155	284	1839	879	6248	41616	483291	0.0105	9	0.0092	0.0092	TRUE	0.1787	NUAK family, SNF1-like kinase, 2 [Source:MGI Symbol;Acc:MGI:1921387]	1	132316126	132333488	1	Nuak2	74137
ENSMUSG00000010461	967	1033	1208	2714	2942	2412	1047	1017	1213	2590	2754	2475	1849.26	1092	2606	2386	1255	17833	3.92542e-57	5.81115e-55	0.0051	0.0023	0.0029	0.0029	TRUE	0.1123	EYA transcriptional coactivator and phosphatase 4 [Source:MGI Symbol;Acc:MGI:1337104]	10	23102963	23350786	-1	Eya4	14051
ENSMUSG00000010609	50	66	64	138	121	112	54	65	64	132	113	115	90.54	61	120	1.96	971	4882	1.04963e+08	7.89971e+08	0	0.0197	0.0161	0.0161	TRUE	0.0828	presenilin 2 [Source:MGI Symbol;Acc:MGI:109284]	1	180227004	180263438	-1	Psen2	19165
ENSMUSG00000010830	84	105	80	204	205	213	91	103	80	195	192	219	146.63	91	202	2201	1138	7019	224.242	3329.35	0	0.0127	11	11	TRUE	0.1277	KDEL (Lys-Asp-Glu-Leu) endoplasmic reticulum protein retention receptor 3 [Source:MGI Symbol;Acc:MGI:2145953]	15	79516411	79527739	1	Kdelr3	105785
ENSMUSG00000012519	142	133	128	319	354	330	154	131	129	304	331	339	231.26	138	325	2361	1.24	9418	4.60752e-08	1.26132e-05	0	0.0086	0.0073	0.0073	TRUE	0.1025	mixed lineage kinase domain-like [Source:MGI Symbol;Acc:MGI:1921818]	8	111311797	111338177	-1	Mlkl	74568
ENSMUSG00000012889	90	82	73	253	225	229	97	81	73	241	211	235	156.41	84	229	2738	1453	8989	2.50044e-05	6.19946e-05	0.0022	12	0.0106	0.0106	TRUE	181	podocan-like 1 [Source:MGI Symbol;Acc:MGI:2685352]	8	84125989	84132527	1	Podnl1	244550
ENSMUSG00000013846	66	79	63	388	380	301	71	78	63	370	356	309	207.88	71	345	4872	2285	14795	1.57628e-35	1.32791e-33	0	0.0094	0.0086	0.0086	TRUE	94	ST3 beta-galactoside alpha-2,3-sialyltransferase 1 [Source:MGI Symbol;Acc:MGI:98304]	15	67102875	67176830	-1	St3gal1	20442
ENSMUSG00000013921	0	0	1	17	14	9	0	0	1	16	13	9	6.59	0	13	35139	5135	3888	0.000101146067137161	0.000541339147668457	0	253	0.2195	0.2195	TRUE	0.3729	CAP-GLY domain containing linker protein 3 [Source:MGI Symbol;Acc:MGI:1923936]	7	30291728	30308367	1	Clip3	76686
ENSMUSG00000014226	1164	1194	1062	1946	2082	2001	1260	1176	1066	1857	1949	2053	1560.18	1167	1953	1674	743	10704	9.74365e-13	3.58003e-11	0.0037	0.0025	0.0028	0.0028	TRUE	0.0688	calcyclin binding protein [Source:MGI Symbol;Acc:MGI:1270839]	1	160202367	160212875	-1	Cacybp	12301
ENSMUSG00000014329	67	65	63	335	387	376	73	64	63	320	362	386	211.26	67	356	5351	2.42	15568	1.19755e-40	1.15572e-38	0	0.0093	0.0084	0.0084	TRUE	0.0912	BicC family RNA binding protein 1 [Source:MGI Symbol;Acc:MGI:1933388]	10	70922832	71159700	-1	Bicc1	83675
ENSMUSG00000014599	2228	2437	2510	4777	5084	4580	2411	2400	2520	4558	4759	4700	3558.1	2444	4672	1912	935	19004	1.58255e-66	2.8059e-65	0.0003	0.0019	0.0014	0.0014	TRUE	0.0091	colony stimulating factor 1 (macrophage) [Source:MGI Symbol;Acc:MGI:1339753]	3	107741048	107760469	-1	Csf1	12977
ENSMUSG00000014778	254	281	249	434	429	386	275	277	250	414	402	396	335.57	267	404	1512	597	5635	1.75291e+06	1.67891e+07	0	0.0064	5	5	TRUE	36	formin homology 2 domain containing 1 [Source:MGI Symbol;Acc:MGI:2679008]	8	105329163	105347953	-1	Fhod1	234686
ENSMUSG00000014782	37	44	28	67	81	57	40	43	28	64	76	58	51.62	37	66	1781	833	3134	0.00172310929001916	0.00698404318293786	0.0081	0.0335	0.0298	0.0298	TRUE	337	pleckstrin homology domain containing, family G (with RhoGef domain) member 4 [Source:MGI Symbol;Acc:MGI:2142544]	8	105373274	105382862	1	Plekhg4	102075
ENSMUSG00000014867	895	1033	930	1696	1704	1481	969	1017	934	1618	1595	1520	1275.48	973	1578	1621	697	10693	1.09472e-12	4.00294e-11	0.0006	0.0027	0.0022	0.0022	TRUE	0.0191	surfeit gene 4 [Source:MGI Symbol;Acc:MGI:98445]	2	26920040	26933928	-1	Surf4	20932
ENSMUSG00000015143	3426	3698	3522	6562	6708	6314	3708	3642	3536	6262	6280	6479	4984.32	3629	6340	1747	805	17.6	2.46312e-55	3.41433e-54	0.0002	0.0017	0.0013	0.0013	TRUE	0.0061	actinin, alpha 1 [Source:MGI Symbol;Acc:MGI:2137706]	12	80167547	80260371	-1	Actn1	109711
ENSMUSG00000015202	277	319	339	530	499	459	300	314	340	506	467	471	399.69	318	481	1512	597	5969	239003	2.55563e+06	0	0.0056	0.0046	0.0046	TRUE	0.0424	Cnksr family member 3 [Source:MGI Symbol;Acc:MGI:2674130]	10	7119063	7212237	-1	Cnksr3	215748
ENSMUSG00000015312	171	205	200	516	462	490	185	202	201	492	432	503	335.9	196	476	2426	1278	11308	1.19939e-15	4.95619e-14	0	0.0063	0.0056	0.0056	TRUE	75	growth arrest and DNA-damage-inducible 45 beta [Source:MGI Symbol;Acc:MGI:107776]	10	80930073	80932204	1	Gadd45b	17873
ENSMUSG00000015501	405	464	481	732	824	749	438	457	483	698	771	769	602.77	459	746	1623	699	8134	0.0416948	0.84252	0.0012	0.0042	0.0036	0.0036	TRUE	0.0373	human immunodeficiency virus type I enhancer binding protein 2 [Source:MGI Symbol;Acc:MGI:1338076]	10	13966075	14151374	1	Hivep2	15273
ENSMUSG00000015605	281	336	298	617	630	561	304	331	299	589	590	576	448.06	311	585	1877	908	9603	7.75111e-08	2.21328e-06	0	0.0051	4	4	TRUE	0.0347	serum response factor [Source:MGI Symbol;Acc:MGI:106658]	17	46548329	46556175	-1	Srf	20807
ENSMUSG00000015932	1062	1103	1036	2293	2331	2335	1149	1086	1040	2188	2182	2396	1673.65	1092	2255	2066	1047	16.22	3.65827e-45	3.98437e-43	0.0021	0.0024	0.0023	0.0023	TRUE	0.0357	destrin [Source:MGI Symbol;Acc:MGI:1929270]	2	143915320	143943324	1	Dstn	56431
ENSMUSG00000015962	3	5	2	14	19	12	3	5	2	13	18	12	8.94	3	14	4265	2092	3061	0.00220746449005959	0.00869078712740216	0	187	153	153	TRUE	0.2395	RIKEN cDNA 1700016C15 gene [Source:MGI Symbol;Acc:MGI:1916678]	1	177729814	177753324	1	1700016C15Rik	69428
ENSMUSG00000016028	5	8	6	29	52	27	5	8	6	28	49	28	20.56	6	35	5379	2427	4987	6.14247e+06	4.79572e+07	0	0.0821	0.0776	0.0776	TRUE	0.9172	cadherin, EGF LAG seven-pass G-type receptor 1 [Source:MGI Symbol;Acc:MGI:1100883]	15	85898929	86034203	-1	Celsr1	12614
ENSMUSG00000016262	471	554	493	1552	1529	1296	510	546	495	1481	1431	1330	965.41	517	1414	2736	1452	19109	2.1107e-67	3.83142e-65	0.0018	0.0031	0.0028	0.0028	TRUE	0.0323	SERTA domain containing 4 [Source:MGI Symbol;Acc:MGI:2443496]	1	192844488	192855756	-1	Sertad4	214791
ENSMUSG00000016356	28	33	30	87	101	79	30	33	30	83	95	81	58.59	31	86	2784	1477	5873	42913.7	4.4453e+06	0	0.0297	0.0235	0.0235	TRUE	0.0696	collagen, type XX, alpha 1 [Source:MGI Symbol;Acc:MGI:1920618]	2	180986535	181018363	1	Col20a1	73368
ENSMUSG00000016481	433	479	428	741	789	666	469	472	430	707	739	683	583.19	457	710	1555	637	7443	9.85002	163.787	0	0.0043	0.0035	0.0035	TRUE	0.0313	complement component (3b/4b) receptor 1-like [Source:MGI Symbol;Acc:MGI:88513]	1	195097382	195131586	-1	Cr1l	12946
ENSMUSG00000016946	247	280	261	434	480	420	267	276	262	414	449	431	349.93	268	431	1608	685	6.59	4410.8	56804	0	0.0061	0.0048	0.0048	TRUE	0.0155	potassium channel tetramerisation domain containing 5 [Source:MGI Symbol;Acc:MGI:1916509]	17	24047734	24073485	-1	Kctd5	69259
ENSMUSG00000017176	129	144	143	291	265	242	140	142	144	278	248	248	199.85	142	258	1821	865	6395	16028.7	196467	0	0.0097	0.0077	0.0077	TRUE	0.0501	5'-nucleotidase, cytosolic IIIB [Source:MGI Symbol;Acc:MGI:1915356]	11	100422321	100441808	-1	Nt5c3b	68106
ENSMUSG00000018593	6993	7736	7021	18401	18308	15318	7569	7619	7049	17558	17139	15718	12108.57	7412	16805	2267	1181	22814	3.29958e-101	1.14345e-98	0.0024	0.0015	0.0018	0.0018	TRUE	0.0391	secreted acidic cysteine rich glycoprotein [Source:MGI Symbol;Acc:MGI:98373]	11	55394500	55423183	-1	Sparc	20692
ENSMUSG00000018648	128	128	138	210	247	206	139	126	139	200	231	211	174.36	135	214	1596	675	4687	2.76574e+08	1.9452e+09	0	0.0109	0.0089	0.0089	TRUE	0.0534	dual specificity phosphatase 14 [Source:MGI Symbol;Acc:MGI:1927168]	11	84048041	84069261	-1	Dusp14	56405
ENSMUSG00000018672	68	75	63	154	136	137	74	74	63	147	127	141	104.26	70	138	1969	977	5271	1.35322e+07	1.16444e+08	0	0.0173	14	14	TRUE	0.0691	coatomer protein complex, subunit zeta 2 [Source:MGI Symbol;Acc:MGI:1929008]	11	96849870	96861203	1	Copz2	56358
ENSMUSG00000018750	75	80	75	199	208	171	81	79	75	190	195	175	132.55	78	187	2383	1253	7.52	5.48237	92.7804	0	0.0139	0.0109	0.0109	TRUE	0.0293	zinc finger and BTB domain containing 4 [Source:MGI Symbol;Acc:MGI:1922830]	11	69765912	69784023	1	Zbtb4	75580
ENSMUSG00000018920	1	2	1	37	14	24	1	2	1	35	13	25	12.85	1	24	17874	4.16	4852	1.22007e+07	9.09712e+08	0	0.1305	0.1341	0.1341	TRUE	0.0592	chemokine (C-X-C motif) ligand 16 [Source:MGI Symbol;Acc:MGI:1932682]	11	70453983	70459984	-1	Cxcl16	66102
ENSMUSG00000019188	330	380	365	652	653	541	357	374	366	622	611	555	481.07	366	596	1.63	704	7597	3.02402	52.22	0	0.0049	4	4	TRUE	0.0419	histocompatibility 13 [Source:MGI Symbol;Acc:MGI:95886]	2	152669461	152708670	1	H13	14950
ENSMUSG00000019326	8	18	12	68	83	72	9	18	12	65	78	74	42.48	13	72	5591	2483	7388	14.9414	24.5502	0	0.0405	0.0351	0.0351	TRUE	0.4744	amine oxidase, copper containing 3 [Source:MGI Symbol;Acc:MGI:1306797]	11	101330605	101341938	1	Aoc3	11754
ENSMUSG00000019461	229	268	243	419	424	341	248	264	244	400	397	350	317.07	252	382	1518	602	5427	5.7462e+06	5.17531e+07	0	0.0066	0.0056	0.0056	TRUE	0.0616	phospholipid scramblase 3 [Source:MGI Symbol;Acc:MGI:1917560]	11	69846376	69852058	1	Plscr3	70310
ENSMUSG00000019467	309	270	312	499	540	486	334	266	313	476	506	499	398.99	304	494	1622	698	6681	2373.88	3172.38	0.0031	0.0056	0.0052	0.0052	TRUE	0.1411	Rho guanine nucleotide exchange factor (GEF) 25 [Source:MGI Symbol;Acc:MGI:1277173]	10	127182525	127190083	-1	Arhgef25	52666
ENSMUSG00000019518	230	235	201	361	379	326	249	231	202	344	355	335	285.99	227	345	1517	601	5143	2.70388e+07	2.22738e+08	0.0004	0.0072	0.0062	0.0062	TRUE	107	adaptor-related protein complex AP-4, mu 1 [Source:MGI Symbol;Acc:MGI:1337063]	5	138172002	138180429	1	Ap4m1	11781
ENSMUSG00000019539	2	7	1	82	65	72	2	7	1	78	61	74	37.17	3	71	20869	4383	8332	0.007926	0.170219	0.0057	46	0.0423	0.0423	TRUE	12829	reticulocalbin 3, EF-hand calcium binding domain [Source:MGI Symbol;Acc:MGI:1277122]	7	45082913	45092221	-1	Rcn3	52377
ENSMUSG00000019577	56	44	35	345	341	314	61	43	35	329	319	322	184.95	46	323	7018	2811	16034	7.42298e-44	7.6997e-42	0	0.0104	0.0096	0.0096	TRUE	0.5408	pyruvate dehydrogenase kinase, isoenzyme 4 [Source:MGI Symbol;Acc:MGI:1351481]	6	5483351	5496309	-1	Pdk4	27273
ENSMUSG00000019779	213	197	209	342	386	344	231	194	210	326	361	353	279.17	212	347	1642	716	6.06	136041	1.49665e+06	0	0.0073	0.0062	0.0062	TRUE	0.0662	fyn-related kinase [Source:MGI Symbol;Acc:MGI:103265]	10	34483399	34611278	1	Frk	14302
ENSMUSG00000019796	6	14	6	28	35	34	6	14	6	27	33	35	20.11	9	32	3563	1833	4.05	5.11447e+09	0.000289049057207759	0	0.0839	0.0742	0.0742	TRUE	0.8201	low density lipoprotein receptor-related protein 11 [Source:MGI Symbol;Acc:MGI:2442989]	10	7589800	7625483	1	Lrp11	237253
ENSMUSG00000019810	67	69	57	229	213	186	73	68	57	219	199	191	134.41	66	203	3085	1625	9365	7.58153e-07	2.03169e-06	0	0.0138	0.0115	0.0115	TRUE	118	fucosidase, alpha-L- 2, plasma [Source:MGI Symbol;Acc:MGI:1914098]	10	13499540	13519035	1	Fuca2	66848
ENSMUSG00000019814	318	330	307	539	578	538	344	325	308	514	541	552	430.81	326	536	1645	718	7456	8.94312	149.195	0	0.0053	0.0042	0.0042	TRUE	0.0268	LTV1 ribosome biogenesis factor [Source:MGI Symbol;Acc:MGI:2447810]	10	13178140	13193168	-1	Ltv1	353258
ENSMUSG00000019817	31	25	28	101	101	87	34	25	28	96	95	89	61.08	29	93	3259	1704	6754	1442.22	19687.6	0	0.0286	0.0229	0.0229	TRUE	0.1304	pleiomorphic adenoma gene-like 1 [Source:MGI Symbol;Acc:MGI:1100874]	10	13060504	13131694	1	Plagl1	22634
ENSMUSG00000019823	8	12	12	58	53	50	9	12	12	55	50	51	31.46	11	52	4786	2259	6085	116583	1.28909e+06	0	0.0541	43	43	TRUE	104	microtubule associated monooxygenase, calponin and LIM domain containing 1 [Source:MGI Symbol;Acc:MGI:2385847]	10	41476314	41487032	1	Mical1	171580
ENSMUSG00000019837	136	141	125	248	235	208	147	139	125	237	220	213	180.27	137	223	1.63	705	4.97	6.70264e+07	5.19054e+08	0	0.0106	0.0086	0.0086	TRUE	0.0575	general transcription factor IIIC, polypeptide 6, alpha [Source:MGI Symbol;Acc:MGI:1914621]	10	40247703	40258108	-1	Gtf3c6	67371
ENSMUSG00000019838	193	165	195	339	352	296	209	163	196	323	330	304	253.98	189	319	1.69	757	6018	17676.6	1.91702e+06	0.0026	0.0079	0.0072	0.0072	TRUE	0.1659	solute carrier family 16 (monocarboxylic acid transporters), member 10 [Source:MGI Symbol;Acc:MGI:1919722]	10	40033532	40142258	-1	Slc16a10	72472
ENSMUSG00000019850	106	126	134	272	259	244	115	124	135	260	242	250	187.62	125	251	2013	1009	7196	62.2172	976.016	0	0.0102	0.0081	0.0081	TRUE	0.0509	tumor necrosis factor, alpha-induced protein 3 [Source:MGI Symbol;Acc:MGI:1196377]	10	19000910	19015657	-1	Tnfaip3	21929
ENSMUSG00000019851	386	414	447	808	762	679	418	408	449	771	713	697	575.89	425	727	1712	776	8873	7.14295e-05	0.00171521	0	0.0043	0.0036	0.0036	TRUE	0.0333	PERP, TP53 apoptosis effector [Source:MGI Symbol;Acc:MGI:1929938]	10	18845020	18857073	1	Perp	64058
ENSMUSG00000019872	29	37	32	118	122	104	31	36	32	113	114	107	72.25	33	111	3334	1737	7495	6.64621	112.228	0	0.0244	19	19	TRUE	0.0481	sphingomyelin phosphodiesterase, acid-like 3A [Source:MGI Symbol;Acc:MGI:1931437]	10	57794335	57811830	1	Smpdl3a	57319
ENSMUSG00000019889	966	1084	1237	2492	2687	2261	1046	1068	1242	2378	2515	2320	1761.39	1119	2404	2.15	1104	15964	2.29397e-43	2.34755e-41	0.0045	0.0023	0.0028	0.0028	TRUE	0.1123	protein tyrosine phosphatase, receptor type, K [Source:MGI Symbol;Acc:MGI:103310]	10	28074820	28597397	1	Ptprk	19272
ENSMUSG00000019907	1468	1480	1607	2441	2541	2317	1589	1458	1613	2329	2379	2377	1957.54	1553	2362	1521	605	10374	3.26515e-11	1.09182e-09	0.0007	0.0023	0.0019	0.0019	TRUE	0.0354	protein phosphatase 1, regulatory subunit 12A [Source:MGI Symbol;Acc:MGI:1309528]	10	108162193	108284475	1	Ppp1r12a	17931
ENSMUSG00000019944	88	98	97	170	189	156	95	97	97	162	177	160	131.39	96	166	1727	788	4849	1.24352e+08	9.24937e+08	0	14	0.0108	0.0108	TRUE	0.0332	Rho-related BTB domain containing 1 [Source:MGI Symbol;Acc:MGI:1916538]	10	69151434	69291791	1	Rhobtb1	69288
ENSMUSG00000019970	775	810	732	3453	3338	3063	839	798	735	3295	3125	3143	1989.02	791	3188	4035	2013	32029	4.32176e-211	3.46833e-208	0.0014	0.0022	2	2	TRUE	0.0449	serum/glucocorticoid regulated kinase 1 [Source:MGI Symbol;Acc:MGI:1340062]	10	21882184	21999903	1	Sgk1	20393
ENSMUSG00000019975	276	347	304	610	579	514	299	342	305	582	542	527	432.86	315	550	1745	804	8145	0.00378991	0.770515	0.0012	0.0052	0.0045	0.0045	TRUE	0.0623	IKBKB interacting protein [Source:MGI Symbol;Acc:MGI:1914704]	10	91082940	91102607	1	Ikbip	67454
ENSMUSG00000019997	128	154	148	2003	2101	2184	139	152	149	1911	1967	2241	1092.98	147	2040	13926	3.8	38354	0	0	0	0.0029	0.0033	0.0033	TRUE	0.0896	cellular communication network factor 2 [Source:MGI Symbol;Acc:MGI:95537]	10	24595442	24598683	1	Ccn2	14219
ENSMUSG00000020029	1909	1970	1898	3181	3232	2901	2066	1940	1906	3035	3026	2977	2491.58	1971	3013	1529	613	11441	2.60182e-16	1.11127e-14	0.0003	0.0021	0.0016	0.0016	TRUE	0.0214	nudix (nucleoside diphosphate linked moiety X)-type motif 4 [Source:MGI Symbol;Acc:MGI:1918457]	10	95547007	95564146	-1	Nudt4	71207
ENSMUSG00000020032	544	592	606	2274	2480	2059	589	583	608	2170	2322	2113	1397.41	593	2202	3.71	1892	27855	9.3088e-157	5.91419e-154	0	0.0026	0.0022	0.0022	TRUE	0.0278	NUAK family, SNF1-like kinase, 1 [Source:MGI Symbol;Acc:MGI:1925226]	10	84370905	84440597	-1	Nuak1	77976
ENSMUSG00000020034	47	47	46	100	106	84	51	46	46	95	99	86	70.7	48	93	1963	973	4394	1.11462e+09	7.08748e+08	0	0.0249	0.0194	0.0194	TRUE	0.0454	t-complex 11 (mouse) like 2 [Source:MGI Symbol;Acc:MGI:2444679]	10	84576626	84614359	1	Tcp11l2	216198
ENSMUSG00000020048	4083	4387	4313	8382	9287	7934	4419	4321	4330	7998	8694	8141	6317.16	4357	8278	1.9	926	19483	1.53085e-70	3.03148e-68	0.0008	0.0017	0.0015	0.0015	TRUE	0.0237	heat shock protein 90, beta (Grp94), member 1 [Source:MGI Symbol;Acc:MGI:98817]	10	86690209	86705509	-1	Hsp90b1	22027
ENSMUSG00000020053	1	1	0	28	21	18	1	1	0	27	20	18	11.15	1	22	31723	4987	4463	8.0988e+08	5.28415e+09	0	0.1502	0.1283	0.1283	TRUE	0.2563	insulin-like growth factor 1 [Source:MGI Symbol;Acc:MGI:96432]	10	87858265	87937042	1	Igf1	16000
ENSMUSG00000020100	118	144	162	265	272	237	128	142	163	253	255	243	197.14	144	250	1735	795	5.75	890769	8.8485e+06	0	0.0098	0.0083	0.0083	TRUE	0.1323	solute carrier family 29 (nucleoside transporters), member 3 [Source:MGI Symbol;Acc:MGI:1918529]	10	60712072	60752794	-1	Slc29a3	71279
ENSMUSG00000020101	29	44	35	107	121	80	31	43	35	102	113	82	67.89	36	99	2705	1435	5922	31846.6	3.35126e+06	0	0.0258	0.0235	0.0235	TRUE	0.2146	V-set immunoregulatory receptor [Source:MGI Symbol;Acc:MGI:1921298]	10	60346851	60372684	1	Vsir	74048
ENSMUSG00000020102	8	6	11	40	34	35	9	6	11	38	32	36	21.92	9	35	4.14	2.05	4707	2.51869e+08	1.78711e+09	0	0.0771	0.0629	0.0629	TRUE	0.2384	solute carrier family 16 (monocarboxylic acid transporters), member 7 [Source:MGI Symbol;Acc:MGI:1330284]	10	125219270	125389465	-1	Slc16a7	20503
ENSMUSG00000020105	276	283	335	875	944	720	299	279	336	835	884	739	561.87	305	819	2691	1428	14422	3.75109e-33	2.94828e-31	0.0066	0.0044	0.0048	0.0048	TRUE	0.0956	leucine-rich repeats and immunoglobulin-like domains 3 [Source:MGI Symbol;Acc:MGI:2443955]	10	125966168	126015359	1	Lrig3	320398
ENSMUSG00000020114	1954	2221	2052	3493	3540	3260	2115	2187	2060	3333	3314	3345	2725.74	2121	3331	1.57	651	12782	2.06118e-23	1.13461e-21	0	2	0.0015	0.0015	TRUE	0.0093	cullin associated and neddylation disassociated 1 [Source:MGI Symbol;Acc:MGI:1261820]	10	119199255	119240055	-1	Cand1	71902
ENSMUSG00000020120	2	0	0	8	17	12	2	0	0	8	16	12	6.34	1	12	17.41	4122	3454	0.000551458867950826	0.00252608105927177	0.0625	0.2632	0.2413	0.2413	TRUE	0.7588	pleckstrin [Source:MGI Symbol;Acc:MGI:1860485]	11	16971206	17052381	-1	Plek	56193
ENSMUSG00000020140	1	1	1	13	9	10	1	1	1	12	8	10	5.69	1	10	10135	3341	3209	0.00133207346779626	0.00558160380240653	0	0.2928	0.2344	0.2344	TRUE	0.1116	leucine rich repeat containing G protein coupled receptor 5 [Source:MGI Symbol;Acc:MGI:1341817]	10	115450311	115587780	-1	Lgr5	14160
ENSMUSG00000020150	140	157	136	254	254	224	152	155	137	242	238	230	192.11	148	237	1605	682	5011	5.42557e+06	4.27541e+08	0	0.01	0.0078	0.0078	TRUE	0.0453	guanidinoacetate methyltransferase [Source:MGI Symbol;Acc:MGI:1098221]	10	80258151	80261012	-1	Gamt	14431
ENSMUSG00000020154	3	3	3	58	58	33	3	3	3	55	54	34	25.45	3	48	15628	3966	6.89	557.102	7872.74	0	0.0666	62	62	TRUE	0.5119	protein tyrosine phosphatase, receptor type, B [Source:MGI Symbol;Acc:MGI:97809]	10	116275523	116389535	1	Ptprb	19263
ENSMUSG00000020163	346	414	356	620	586	673	374	408	357	592	549	691	495.06	380	611	1605	682	6683	2333.09	31206	0.0077	0.0048	0.0054	0.0054	TRUE	0.1542	ubiquinol-cytochrome c reductase, complex III subunit XI [Source:MGI Symbol;Acc:MGI:1913844]	10	80402997	80406830	-1	Uqcr11	66594
ENSMUSG00000020166	913	1001	1113	1811	1895	1603	988	986	1117	1728	1774	1645	1373.05	1030	1716	1665	735	10807	3.19797e-13	1.1981e-11	0.0022	0.0026	0.0026	0.0026	TRUE	0.0655	CCR4-NOT transcription complex, subunit 2 [Source:MGI Symbol;Acc:MGI:1919318]	10	116485161	116581511	-1	Cnot2	72068
ENSMUSG00000020170	970	1104	1093	1687	1763	1575	1050	1087	1097	1610	1650	1616	1351.79	1078	1625	1507	592	9674	3.87834e-08	1.12428e-07	0	0.0026	0.0019	0.0019	TRUE	0.0062	fibroblast growth factor receptor substrate 2 [Source:MGI Symbol;Acc:MGI:1100860]	10	117069427	117148534	-1	Frs2	327826
ENSMUSG00000020176	87	111	75	2354	2397	2182	94	109	75	2246	2244	2239	1167.98	93	2243	24122	4592	43116	0	0	0	0.0028	0.0025	0.0025	TRUE	0.2752	growth factor receptor bound protein 10 [Source:MGI Symbol;Acc:MGI:103232]	11	11930508	12038683	-1	Grb10	14783
ENSMUSG00000020186	162	196	174	334	302	340	175	193	175	319	283	349	248.89	181	317	1747	805	6.32	26155	313778	0.0043	0.0081	0.0073	0.0073	TRUE	0.1015	cysteine and glycine-rich protein 2 [Source:MGI Symbol;Acc:MGI:1202907]	10	110919789	110939622	1	Csrp2	13008
ENSMUSG00000020191	14	12	10	63	42	37	15	12	10	60	39	38	29.07	12	46	3729	1899	4951	7.39982e+07	5.69861e+08	0	0.0585	0.0538	0.0538	TRUE	0.6039	spermatogenesis associated 48 [Source:MGI Symbol;Acc:MGI:1921112]	11	11462094	11515192	1	Spata48	73862
ENSMUSG00000020224	186	176	202	314	320	330	201	173	203	300	300	339	252.54	192	313	1624	0.7	5624	1.86955e+06	1.78615e+07	0	8	0.0069	0.0069	TRUE	0.0838	LLP homolog, long-term synaptic facilitation (Aplysia) [Source:MGI Symbol;Acc:MGI:1913475]	10	120227070	120232582	1	Llph	66225
ENSMUSG00000020225	134	184	186	364	381	330	145	181	187	347	357	339	259.27	171	348	2029	1021	8146	0.0377584	0.768679	0.0005	0.0078	0.0069	0.0069	TRUE	181	transmembrane BAX inhibitor motif containing 4 [Source:MGI Symbol;Acc:MGI:1915462]	10	120201590	120224917	1	Tmbim4	68212
ENSMUSG00000020238	796	898	836	1415	1446	1245	862	884	839	1350	1354	1277	1094.43	862	1327	1.54	623	9314	1.22801e-07	3.28502e-05	0	0.0029	0.0023	0.0023	TRUE	0.0127	nicalin [Source:MGI Symbol;Acc:MGI:1926081]	10	81486249	81496392	-1	Ncln	103425
ENSMUSG00000020241	24	25	19	261	234	214	26	25	19	249	219	220	126.23	23	229	9892	3306	14667	1.046e-34	8.62132e-33	0	0.0146	0.0124	0.0124	TRUE	0.1451	collagen, type VI, alpha 2 [Source:MGI Symbol;Acc:MGI:88460]	10	76595762	76623630	-1	Col6a2	12834
ENSMUSG00000020260	315	302	296	710	708	614	341	297	297	677	663	630	484.31	312	657	2109	1077	11339	8.41764e-16	3.49733e-14	0.0004	0.0048	0.0041	0.0041	TRUE	0.0733	protein O-fucosyltransferase 2 [Source:MGI Symbol;Acc:MGI:1916863]	10	77259218	77269575	1	Pofut2	80294
ENSMUSG00000020262	187	174	207	441	452	377	202	171	208	421	423	387	302.06	194	410	2119	1083	9263	1.99181e-06	5.28193e-05	0.0014	0.0069	6	6	TRUE	0.1145	adenosine deaminase, RNA-specific, B1 [Source:MGI Symbol;Acc:MGI:891999]	10	77290726	77418270	-1	Adarb1	110532
ENSMUSG00000020308	139	142	136	253	232	220	150	140	137	241	217	226	185.2	142	228	1604	682	4911	9.06645e+07	6.89847e+08	0	0.0104	0.0082	0.0082	TRUE	0.0292	tubulin polyglutamylase complex subunit 1 [Source:MGI Symbol;Acc:MGI:106618]	10	79669369	79676127	1	Tpgs1	110012
ENSMUSG00000020312	1	3	4	29	24	24	1	3	4	28	22	25	13.8	3	25	9172	3197	4.89	1.00853e+07	7.62421e+08	0	0.1216	0.1004	0.1004	TRUE	0.2833	SHC (Src homology 2 domain containing) transforming protein 2 [Source:MGI Symbol;Acc:MGI:106180]	10	79618051	79637918	-1	Shc2	216148
ENSMUSG00000020376	27	25	32	74	56	49	29	25	32	71	52	50	43.21	29	58	2019	1014	3491	0.000480737338417972	0.00223008303504632	0	0.0398	0.0345	0.0345	TRUE	0.3287	ring finger protein 130 [Source:MGI Symbol;Acc:MGI:1891717]	11	50025346	50125719	1	Rnf130	59044
ENSMUSG00000020377	138	161	144	255	249	233	149	159	145	243	233	239	194.67	151	238	1581	661	4914	8.91898e+07	6.79643e+08	0	0.0099	0.0076	0.0076	TRUE	0.0217	leukotriene C4 synthase [Source:MGI Symbol;Acc:MGI:107498]	11	50236461	50238616	-1	Ltc4s	17001
ENSMUSG00000020423	181	173	190	548	569	473	196	170	191	523	533	485	349.66	186	514	2.77	1.47	13275	3.24189e-26	1.92344e-24	0	0.0062	0.0051	0.0051	TRUE	0.0572	BTG anti-proliferation factor 2 [Source:MGI Symbol;Acc:MGI:108384]	1	134075170	134079120	-1	Btg2	12227
ENSMUSG00000020484	366	349	321	868	872	709	396	344	322	828	816	728	572.36	354	791	2237	1162	12161	5.04213e-20	2.44848e-19	0.0051	0.0043	0.0045	0.0045	TRUE	0.1205	X-box binding protein 1 [Source:MGI Symbol;Acc:MGI:98970]	11	5520659	5525893	1	Xbp1	22433
ENSMUSG00000020571	1074	1166	1092	1840	1899	1739	1162	1148	1096	1756	1778	1784	1454.16	1135	1773	1561	643	10672	1.37064e-12	4.9872e-11	0	0.0025	0.0019	0.0019	TRUE	11	protein disulfide isomerase associated 6 [Source:MGI Symbol;Acc:MGI:1919103]	12	17266545	17284770	1	Pdia6	71853
ENSMUSG00000020589	15	21	22	64	53	61	16	21	22	61	50	63	38.71	20	58	2926	1549	4946	7.56427e+07	5.82231e+08	0	0.0443	0.0363	0.0363	TRUE	0.1342	family with sequence similarity 49, member A [Source:MGI Symbol;Acc:MGI:1261783]	12	12262139	12380965	1	Fam49a	76820
ENSMUSG00000020609	1	1	3	61	54	45	1	1	3	58	51	46	26.67	2	52	30352	4924	6.93	421.396	6027.63	0	0.0636	0.0542	0.0542	TRUE	0.3641	apolipoprotein B [Source:MGI Symbol;Acc:MGI:88052]	12	7977648	8016835	1	Apob	238055
ENSMUSG00000020614	546	609	629	1048	1013	846	591	600	632	1000	948	868	773.1	608	939	1546	629	7866	0.00365475	6.89698	0.0021	0.0036	0.0032	0.0032	TRUE	51	family with sequence similarity 20, member A [Source:MGI Symbol;Acc:MGI:2388266]	11	109669749	109722279	-1	Fam20a	208659
ENSMUSG00000020654	17	16	12	136	133	100	18	16	12	130	125	103	67.18	15	119	7758	2956	10219	1.63467e-10	5.3146e-09	0	0.0261	0.0229	0.0229	TRUE	169	adenylate cyclase 3 [Source:MGI Symbol;Acc:MGI:99675]	12	4133103	4213525	1	Adcy3	104111
ENSMUSG00000020668	146	190	177	285	271	272	158	187	178	272	254	279	221.26	174	268	1537	0.62	4787	1.69366e+08	1.22976e+09	0	0.0089	0.0073	0.0073	TRUE	0.0688	kinesin family member 3C [Source:MGI Symbol;Acc:MGI:107979]	12	3365132	3406494	1	Kif3c	16570
ENSMUSG00000020671	583	638	604	1330	1387	1210	631	628	606	1269	1298	1242	945.81	622	1270	2042	1.03	14631	1.79425e-34	1.46303e-32	0	0.0032	0.0024	0.0024	TRUE	0.0056	RAB10, member RAS oncogene family [Source:MGI Symbol;Acc:MGI:105066]	12	3247428	3309969	-1	Rab10	19325
ENSMUSG00000020674	645	775	827	1712	1680	1327	698	763	830	1634	1573	1362	1143.27	764	1523	1993	995	12157	5.26108e-20	2.53864e-18	0.0073	0.0029	0.0038	0.0038	TRUE	0.1022	peroxidasin [Source:MGI Symbol;Acc:MGI:1916925]	12	29937608	30017658	1	Pxdn	69675
ENSMUSG00000020844	365	419	418	732	749	662	395	413	420	698	701	679	551.05	409	693	1693	0.76	8884	6.47729e-05	0.00156523	0	0.0044	0.0033	0.0033	TRUE	0.0101	nucleoredoxin [Source:MGI Symbol;Acc:MGI:109331]	11	76257198	76399140	-1	Nxn	18230
ENSMUSG00000020846	193	246	207	590	635	517	209	242	208	563	594	530	391.15	220	562	2.56	1356	12716	4.8489e-23	2.61258e-21	0.0019	0.0056	5	5	TRUE	0.0909	refilin B [Source:MGI Symbol;Acc:MGI:1923816]	11	76019194	76027782	-1	Rflnb	76566
ENSMUSG00000020848	4	5	0	37	29	32	4	5	0	35	27	33	17.42	3	32	10343	3371	5516	3.46679e+06	3.20373e+07	0	0.0966	0.0873	0.0873	TRUE	10515	double C2, beta [Source:MGI Symbol;Acc:MGI:1100497]	11	75768966	75796049	-1	Doc2b	13447
ENSMUSG00000020873	294	329	296	574	501	417	318	324	297	548	469	428	397.33	313	482	1539	622	5709	1.13922e+06	1.11853e+06	0.0072	0.0056	0.0059	0.0059	TRUE	0.1685	solute carrier family 35, member B1 [Source:MGI Symbol;Acc:MGI:1343133]	11	95384692	95391776	1	Slc35b1	110172
ENSMUSG00000020900	153	180	172	860	827	850	166	177	173	821	774	872	497.09	172	822	4.78	2257	21928	1.39272e-93	4.08388e-90	0	0.0047	0.0041	0.0041	TRUE	0.0331	myosin, heavy polypeptide 10, non-muscle [Source:MGI Symbol;Acc:MGI:1930780]	11	68691559	68816632	1	Myh10	77579
ENSMUSG00000020986	467	504	469	808	819	671	505	496	471	771	767	689	616.48	491	742	1513	597	7024	215.936	3218.57	0.0014	0.0041	0.0035	0.0035	TRUE	0.0464	SEC23 homolog A, COPII coat complex component [Source:MGI Symbol;Acc:MGI:1349635]	12	58958383	59012017	-1	Sec23a	20334
ENSMUSG00000021095	0	0	0	6	8	11	0	0	0	6	7	11	4.08	0	8	43303	5436	3868	0.00010975224278809	0.000584119440849144	0	0.4077	364	364	TRUE	0.2071	goosecoid homeobox [Source:MGI Symbol;Acc:MGI:95841]	12	104471209	104473330	-1	Gsc	14836
ENSMUSG00000021097	11	13	13	66	85	57	12	13	13	63	80	58	39.8	13	67	5325	2413	7051	178.226	2688.03	0	0.0431	0.0366	0.0366	TRUE	0.2455	calmin [Source:MGI Symbol;Acc:MGI:2136957]	12	104763117	104865076	-1	Clmn	94040
ENSMUSG00000021127	757	870	821	1565	1562	1409	819	857	824	1493	1462	1446	1150.29	833	1467	1.76	816	12532	5.01355e-22	2.57396e-20	0	0.0028	0.0021	0.0021	TRUE	0.0072	zinc finger protein 36, C3H type-like 1 [Source:MGI Symbol;Acc:MGI:107946]	12	80107754	80113013	-1	Zfp36l1	12192
ENSMUSG00000021136	0	0	0	3	10	5	0	0	0	3	9	5	2.89	0	6	30795	4945	3291	0.000999312330760473	0.00430925181545127	0.2538	575	0.5433	0.5433	TRUE	0.1352	SPARC related modular calcium binding 1 [Source:MGI Symbol;Acc:MGI:1929878]	12	81026808	81186414	1	Smoc1	64075
ENSMUSG00000021253	209	199	215	365	363	374	226	196	216	348	340	384	284.99	213	357	1.68	749	6.39	16622.6	203257	0	0.0072	0.0061	0.0061	TRUE	0.0524	transforming growth factor, beta 3 [Source:MGI Symbol;Acc:MGI:98727]	12	86056745	86079041	-1	Tgfb3	21809
ENSMUSG00000021260	126	147	129	248	220	191	136	145	130	237	206	196	174.87	137	213	1556	637	4378	1.19776e+09	7.57188e+08	0	0.0109	0.0093	0.0093	TRUE	0.1053	hedgehog interacting protein-like 1 [Source:MGI Symbol;Acc:MGI:1919265]	12	108306270	108330869	1	Hhipl1	214305
ENSMUSG00000021285	76	101	89	175	174	162	82	99	89	167	163	166	127.86	90	165	1827	0.87	5232	1.68095e+07	1.42474e+08	0	0.0144	0.0113	0.0113	TRUE	0.0754	protein phosphatase 1, regulatory subunit 13B [Source:MGI Symbol;Acc:MGI:1336199]	12	111828457	111908110	-1	Ppp1r13b	21981
ENSMUSG00000021314	1	0	0	7	11	14	1	0	0	7	10	14	5.4	0	10	28442	4.83	3569	0.000358812604637774	0.00172049515582289	0	0.3084	0.2735	0.2735	TRUE	0.3886	amphiphysin [Source:MGI Symbol;Acc:MGI:103574]	13	18948205	19150921	1	Amph	218038
ENSMUSG00000021360	49	53	53	128	132	117	53	52	53	122	124	120	87.37	53	122	2309	1207	6003	19341.4	2.0931e+06	0	0.0204	0.0155	0.0155	TRUE	0.0018	glucosaminyl (N-acetyl) transferase 2, I-branching enzyme [Source:MGI Symbol;Acc:MGI:1100870]	13	40859754	40960892	1	Gcnt2	14538
ENSMUSG00000021367	21	31	22	207	174	151	23	31	22	198	163	155	98.45	25	172	6825	2771	11755	6.62579e-18	2.98905e-17	0	0.0183	0.0169	0.0169	TRUE	0.2255	endothelin 1 [Source:MGI Symbol;Acc:MGI:95283]	13	42301476	42307990	1	Edn1	13614
ENSMUSG00000021411	23	25	18	51	65	79	25	25	18	49	61	81	43.03	23	64	2817	1494	4832	1.34845e+08	9.97143e+07	32	0.04	0.0385	0.0385	TRUE	0.1802	PX domain containing 1 [Source:MGI Symbol;Acc:MGI:1914145]	13	34627834	34653486	-1	Pxdc1	66895
ENSMUSG00000021453	83	95	85	182	186	195	90	94	85	174	174	200	136.1	90	183	2037	1026	6.26	38565.8	449924	0	0.0136	11	11	TRUE	0.0739	growth arrest and DNA-damage-inducible 45 gamma [Source:MGI Symbol;Acc:MGI:1346325]	13	51846678	51848468	1	Gadd45g	23882
ENSMUSG00000021469	27	18	20	44	60	46	29	18	20	42	56	47	35.4	22	48	2.18	1124	3481	0.000500201117098766	0.00230983241475529	0	0.0483	0.0422	0.0422	TRUE	0.3932	msh homeobox 2 [Source:MGI Symbol;Acc:MGI:97169]	13	53466884	53473074	-1	Msx2	17702
ENSMUSG00000021492	13	12	10	26	30	36	14	12	10	25	28	37	20.96	12	30	2502	1323	3168	0.00153402387568749	0.00631160174217023	0	0.0806	0.0666	0.0666	TRUE	0.2711	coagulation factor XII (Hageman factor) [Source:MGI Symbol;Acc:MGI:1891012]	13	55417958	55426793	-1	F12	58992
ENSMUSG00000021493	575	624	616	1686	1614	1570	622	615	618	1609	1511	1611	1097.67	618	1577	2.55	1.35	19629	8.78999e-72	1.81121e-69	0	0.0029	0.0023	0.0023	TRUE	0.0163	PDZ and LIM domain 7 [Source:MGI Symbol;Acc:MGI:1914649]	13	55495795	55513676	-1	Pdlim7	67399
ENSMUSG00000021591	72	82	91	198	193	194	78	81	91	189	181	199	136.45	83	190	2271	1184	7193	63.173	98.9992	0	0.0136	0.0108	0.0108	TRUE	0.0668	glutaredoxin [Source:MGI Symbol;Acc:MGI:2135625]	13	75839868	75850154	1	Glrx	93692
ENSMUSG00000021611	5	4	6	29	23	13	5	4	6	28	22	13	12.99	5	21	4086	2031	3538	0.000402659819144856	0.00190734915263149	0	0.1292	0.1142	0.1142	TRUE	111	telomerase reverse transcriptase [Source:MGI Symbol;Acc:MGI:1202709]	13	73626911	73649843	1	Tert	21752
ENSMUSG00000021662	85	89	96	197	199	184	92	88	96	188	186	189	139.85	92	188	2.04	1029	6462	10311.4	128035	0	0.0133	0.0101	0.0101	TRUE	0.0172	Rho guanine nucleotide exchange factor (GEF) 28 [Source:MGI Symbol;Acc:MGI:1346016]	13	97899469	98206439	-1	Arhgef28	110596
ENSMUSG00000021701	1031	1101	1016	1795	1838	1735	1116	1084	1020	1713	1721	1780	1405.66	1073	1738	1619	695	11085	1.49155e-14	5.9537e-13	0.0002	0.0026	0.0021	0.0021	TRUE	0.0227	polo like kinase 2 [Source:MGI Symbol;Acc:MGI:1099790]	13	110395046	110400844	1	Plk2	20620
ENSMUSG00000021703	45	58	53	105	121	74	49	57	53	100	113	76	74.74	53	96	1821	865	3838	0.000123940471154732	0.000654127985220424	0.0144	0.0236	0.0219	0.0219	TRUE	0.2789	serine incorporator 5 [Source:MGI Symbol;Acc:MGI:2444223]	13	92611091	92711947	1	Serinc5	218442
ENSMUSG00000021725	327	353	395	584	628	575	354	348	397	557	588	590	472.22	366	578	1.58	0.66	7031	204.967	3067.06	0	0.0049	0.0041	0.0041	TRUE	0.0616	poly (ADP-ribose) polymerase family, member 8 [Source:MGI Symbol;Acc:MGI:1098713]	13	116854820	117025537	-1	Parp8	52552
ENSMUSG00000021733	543	581	650	1431	1502	1174	588	572	653	1365	1406	1205	964.78	604	1325	2195	1134	14046	8.15567e-31	6.03678e-31	0.0048	0.0031	0.0035	0.0035	TRUE	0.0756	solute carrier family 4, sodium bicarbonate cotransporter, member 7 [Source:MGI Symbol;Acc:MGI:2443878]	14	14702279	14799940	1	Slc4a7	218756
ENSMUSG00000021786	12	9	14	46	33	29	13	9	14	44	31	30	23.41	12	35	2.92	1546	3804	0.000142529609970638	0.000744532885519797	0	0.0723	0.0623	0.0623	TRUE	0.3761	3-oxoacyl-ACP synthase, mitochondrial [Source:MGI Symbol;Acc:MGI:1918397]	14	16238652	16249808	-1	Oxsm	71147
ENSMUSG00000021798	18	38	34	95	110	115	19	37	34	91	103	118	67.11	30	104	3.4	1765	6903	509.245	7229.95	0.0222	0.0261	0.0257	0.0257	TRUE	0.5153	LIM domain binding 3 [Source:MGI Symbol;Acc:MGI:1344412]	14	34526603	34588682	-1	Ldb3	24131
ENSMUSG00000021806	29	39	37	145	130	99	31	38	37	138	122	102	78.1	35	121	3378	1756	7591	3.16575	54.6056	0	0.0227	0.0202	0.0202	TRUE	0.1027	nidogen 2 [Source:MGI Symbol;Acc:MGI:1298229]	14	19751265	19811787	1	Nid2	18074
ENSMUSG00000021822	70	75	72	376	374	319	76	74	72	359	350	327	209.69	74	345	4673	2224	15051	3.4003e-38	3.0144e-35	0	0.0093	0.0074	0.0074	TRUE	0.0235	plasminogen activator, urokinase [Source:MGI Symbol;Acc:MGI:97611]	14	20836660	20843385	1	Plau	18792
ENSMUSG00000021823	2139	2398	2393	5096	5312	4873	2315	2362	2403	4863	4973	5000	3652.48	2360	4945	2095	1067	22.36	9.66773e-97	3.00844e-97	0	0.0019	0.0013	0.0013	TRUE	0.0033	vinculin [Source:MGI Symbol;Acc:MGI:98927]	14	20929398	21033676	1	Vcl	22330
ENSMUSG00000021913	64	71	64	118	132	98	69	70	64	113	124	101	90.03	68	113	1657	729	3706	0.000210971904732146	0.00106555137573891	0	0.0198	16	16	TRUE	0.0811	oxoglutarate dehydrogenase-like [Source:MGI Symbol;Acc:MGI:3616088]	14	32322019	32348151	1	Ogdhl	239017
ENSMUSG00000021944	1	2	1	23	17	19	1	2	1	22	16	19	10.24	1	19	14041	3812	4422	9.76605e+08	6.26737e+08	0	0.1635	0.1344	0.1344	TRUE	0.1203	GATA binding protein 4 [Source:MGI Symbol;Acc:MGI:95664]	14	63198922	63271692	-1	Gata4	14463
ENSMUSG00000021948	3	2	0	20	15	15	3	2	0	19	14	15	8.96	2	16	9455	3241	3933	8.39741e+09	0.0004546588646223	0	0.1867	0.1606	0.1606	TRUE	0.6156	protein kinase C, delta [Source:MGI Symbol;Acc:MGI:97598]	14	30595354	30626210	-1	Prkcd	18753
ENSMUSG00000021998	0	1	0	5	13	14	0	1	0	5	12	14	5.38	0	10	28.42	4829	3.54	0.000399824520073383	0.00189509613990642	0	0.3097	0.2942	0.2942	TRUE	0.4528	lymphocyte cytosolic protein 1 [Source:MGI Symbol;Acc:MGI:104808]	14	75131101	75230842	1	Lcp1	18826
ENSMUSG00000022037	5	6	3	36	26	25	5	6	3	34	24	26	16.45	5	28	5894	2559	4737	2.16793e+08	1.55487e+09	0	0.1023	0.0859	0.0859	TRUE	0.2512	clusterin [Source:MGI Symbol;Acc:MGI:88423]	14	65968483	65981547	1	Clu	12759
ENSMUSG00000022106	133	152	180	292	307	275	144	150	181	279	287	282	220.43	158	283	1787	837	6336	23596.5	285103	0	0.0089	0.0076	0.0076	TRUE	0.1658	regulator of chromosome condensation (RCC1) and BTB (POZ) domain containing protein 2 [Source:MGI Symbol;Acc:MGI:1917200]	14	73123037	73207843	1	Rcbtb2	105670
ENSMUSG00000022146	153	171	170	294	301	241	166	168	171	281	282	247	219.05	168	270	1605	683	5.28	1.29426e+07	1.11686e+07	0	9	0.0072	0.0072	TRUE	0.0588	oncostatin M receptor [Source:MGI Symbol;Acc:MGI:1330819]	15	6813577	6874969	-1	Osmr	18414
ENSMUSG00000022197	161	189	220	429	458	400	174	186	221	409	429	410	304.97	194	416	2146	1102	9409	4.99864e-07	1.36106e-05	0.0009	0.0068	0.0061	0.0061	TRUE	0.1627	PDZ domain containing 2 [Source:MGI Symbol;Acc:MGI:1922394]	15	12359711	12739924	-1	Pdzd2	68070
ENSMUSG00000022206	112	115	127	597	743	619	121	113	128	570	696	635	377.06	121	634	5252	2393	19547	4.37238e-71	8.88935e-69	0	0.0058	0.0058	0.0058	TRUE	75	natriuretic peptide receptor 3 [Source:MGI Symbol;Acc:MGI:97373]	15	11839896	11907287	-1	Npr3	18162
ENSMUSG00000022208	0	0	1	9	8	5	0	0	1	9	7	5	3.7	0	7	19327	4273	3015	0.00257350361842702	0.00999256001369372	0	0.4496	0.3791	0.3791	TRUE	0.4083	junctophilin 4 [Source:MGI Symbol;Acc:MGI:2443113]	14	55106826	55116935	-1	Jph4	319984
ENSMUSG00000022261	776	918	905	1457	1511	1306	840	904	909	1390	1415	1340	1132.91	884	1382	1562	644	9607	7.49627e-08	2.14856e-06	0	0.0029	0.0023	0.0023	TRUE	0.0224	syndecan 2 [Source:MGI Symbol;Acc:MGI:1349165]	15	32920723	33034935	1	Sdc2	15529
ENSMUSG00000022270	265	361	335	522	556	439	287	356	336	498	520	450	407.95	326	489	1.5	585	5.53	320144	2.96751e+07	0.0057	0.0055	0.0055	0.0055	TRUE	0.1236	reticulophagy regulator 1 [Source:MGI Symbol;Acc:MGI:1913520]	15	25843180	25973687	1	Retreg1	66270
ENSMUSG00000022272	2123	2558	2453	4451	4330	4009	2298	2519	2463	4247	4053	4114	3282.34	2427	4138	1705	0.77	14625	1.94689e-35	1.57906e-32	0.0009	0.0019	0.0017	0.0017	TRUE	0.0258	myosin X [Source:MGI Symbol;Acc:MGI:107716]	15	25622525	25813673	1	Myo10	17909
ENSMUSG00000022297	5	6	6	75	65	68	5	6	6	72	61	70	36.59	6	68	11636	3541	8221	0.0202399	0.419318	0	0.0468	0.0382	0.0382	TRUE	0.0665	frizzled class receptor 6 [Source:MGI Symbol;Acc:MGI:108474]	15	39006034	39038188	1	Fzd6	14368
ENSMUSG00000022305	184	215	225	356	392	312	199	212	226	340	367	320	277.27	212	342	1612	689	5.84	521583	5.35202e+06	0	0.0074	0.0062	0.0062	TRUE	0.0459	low density lipoprotein-related protein 12 [Source:MGI Symbol;Acc:MGI:2443132]	15	39870589	39943994	-1	Lrp12	239393
ENSMUSG00000022311	25	39	45	172	206	166	27	38	45	164	193	170	106.32	37	176	4746	2247	10.63	2.15584e-12	7.73465e-11	0.0048	17	0.0156	0.0156	TRUE	0.3663	CUB and Sushi multiple domains 3 [Source:MGI Symbol;Acc:MGI:2386403]	15	47580637	48792063	-1	Csmd3	239420
ENSMUSG00000022321	32	42	52	148	166	167	35	41	52	141	155	171	99.36	43	156	3638	1863	8929	4.31454e-05	0.00105769	0.0048	0.0181	0.0163	0.0163	TRUE	0.2882	cadherin 10 [Source:MGI Symbol;Acc:MGI:107436]	15	18818947	19014236	1	Cdh10	320873
ENSMUSG00000022367	6	7	1	38	39	42	6	7	1	36	37	43	21.71	5	39	8.08	3014	5883	401815	4.18216e+06	0	0.0778	0.0695	0.0695	TRUE	0.9609	hyaluronan synthase 2 [Source:MGI Symbol;Acc:MGI:107821]	15	56665627	56694539	-1	Has2	15117
ENSMUSG00000022377	3677	4186	4659	7245	7440	6402	3980	4123	4678	6913	6965	6569	5537.84	4260	6816	1.6	678	11566	6.10858e-17	2.66125e-15	4	0.0017	0.0023	0.0023	TRUE	0.0896	ArfGAP with SH3 domain, ankyrin repeat and PH domain1 [Source:MGI Symbol;Acc:MGI:1342335]	15	64086857	64382919	-1	Asap1	13196
ENSMUSG00000022434	203	215	207	320	341	330	220	212	208	305	319	339	267.08	213	321	1507	591	5051	4.40054e+07	3.50755e+08	0	0.0076	6	6	TRUE	0.0254	family with sequence similarity 118, member A [Source:MGI Symbol;Acc:MGI:1920475]	15	85028948	85062830	1	Fam118a	73225
ENSMUSG00000022440	280	293	259	780	815	724	303	289	260	744	763	743	516.96	284	750	2644	1403	15101	1.58696e-37	1.43183e-35	0	0.0046	0.0038	0.0038	TRUE	0.0609	C1q and tumor necrosis factor related protein 6 [Source:MGI Symbol;Acc:MGI:1919959]	15	78523346	78531416	-1	C1qtnf6	72709
ENSMUSG00000022454	0	0	1	19	26	24	0	0	1	18	24	25	11.35	0	22	61001	5931	4699	2.60928e+08	1.84623e+09	0	0.1476	0.1261	0.1261	TRUE	0.4083	NEL-like 2 [Source:MGI Symbol;Acc:MGI:1858510]	15	95075230	95528559	-1	Nell2	54003
ENSMUSG00000022456	3	11	5	29	22	21	3	11	5	28	21	22	14.82	6	24	3619	1856	3502	0.000461605722824533	0.00214786819091501	0.0032	0.1134	102	102	TRUE	0.9522	septin 3 [Source:MGI Symbol;Acc:MGI:1345148]	15	82268802	82294574	1	Septin3	24050
ENSMUSG00000022479	112	111	100	245	255	230	121	109	100	234	239	236	173.24	110	236	2144	1.1	7522	0.539173	91.3479	0	11	0.0087	0.0087	TRUE	0.0714	vitamin D (1,25-dihydroxyvitamin D3) receptor [Source:MGI Symbol;Acc:MGI:103076]	15	97854425	97910630	-1	Vdr	22337
ENSMUSG00000022483	0	0	0	5	6	6	0	0	0	5	6	6	2.76	0	6	29291	4872	3263	0.00110349511658335	0.00470265330845806	0	0.6031	519	519	TRUE	0.0711	collagen, type II, alpha 1 [Source:MGI Symbol;Acc:MGI:88452]	15	97975602	98004695	-1	Col2a1	12824
ENSMUSG00000022489	14	18	19	89	100	61	15	18	19	85	94	63	48.85	17	81	4639	2214	7218	5.25877	830.08	0	0.0354	0.0323	0.0323	TRUE	0.3175	phosphodiesterase 1B, Ca2+-calmodulin dependent [Source:MGI Symbol;Acc:MGI:97523]	15	103503034	103530052	1	Pde1b	18574
ENSMUSG00000022519	78	81	90	175	164	130	84	80	90	167	154	133	118.08	85	151	1785	836	4755	1.97967e+08	1.42994e+09	0	0.0155	13	13	TRUE	0.1099	sarcalumenin [Source:MGI Symbol;Acc:MGI:2146620]	16	4480216	4541816	-1	Srl	106393
ENSMUSG00000022525	7	8	6	42	49	28	8	8	6	40	46	29	22.69	7	38	5353	2.42	5331	9.77811e+06	8.58357e+07	0	0.0745	0.0644	0.0644	TRUE	0.1963	phospholipase A and acyltransferase 1 [Source:MGI Symbol;Acc:MGI:1351473]	16	29209695	29230531	1	Plaat1	27281
ENSMUSG00000022537	68	91	88	154	190	144	74	90	88	147	178	148	120.69	84	158	1877	908	5151	2.5912e+07	2.13802e+08	0	0.0152	0.0132	0.0132	TRUE	0.1376	transmembrane protein 44 [Source:MGI Symbol;Acc:MGI:1924489]	16	30511855	30550842	-1	Tmem44	224090
ENSMUSG00000022587	760	927	772	2588	2318	2089	823	913	775	2470	2170	2144	1548.93	837	2261	2701	1434	19123	1.62162e-67	2.9791e-65	0.0055	0.0025	0.0032	0.0032	TRUE	79	lymphocyte antigen 6 complex, locus E [Source:MGI Symbol;Acc:MGI:106651]	15	74955051	74959905	1	Ly6e	17069
ENSMUSG00000022610	1	3	5	22	16	21	1	3	5	21	15	22	11.1	3	19	6272	2649	3961	7.45873e+09	0.000407995154130435	0	0.1509	0.1295	0.1295	TRUE	0.4331	mitogen-activated protein kinase 12 [Source:MGI Symbol;Acc:MGI:1353438]	15	89130584	89140703	-1	Mapk12	29857
ENSMUSG00000022661	59	65	68	265	265	245	64	64	68	253	248	251	158.08	65	251	3834	1939	11969	5.15918e-19	2.39839e-17	0	0.0119	0.0092	0.0092	TRUE	0.0134	CD200 antigen [Source:MGI Symbol;Acc:MGI:1196990]	16	45382135	45409053	-1	Cd200	17470
ENSMUSG00000022665	11	10	8	172	199	167	12	10	8	164	186	171	91.93	10	174	17597	4137	13197	9.12341e-26	5.35053e-24	0	0.0195	0.0163	0.0163	TRUE	0.0961	coiled-coil domain containing 80 [Source:MGI Symbol;Acc:MGI:1915146]	16	45093402	45128077	1	Ccdc80	67896
ENSMUSG00000022676	202	201	180	323	336	355	219	198	181	308	315	364	264.05	199	329	1653	725	5811	622010	6.32293e+06	0.0048	0.0077	0.0072	0.0072	TRUE	0.0984	snail family zinc finger 2 [Source:MGI Symbol;Acc:MGI:1096393]	16	14705852	14709385	1	Snai2	20583
ENSMUSG00000022679	63	68	68	121	121	104	68	67	68	115	113	107	89.81	68	112	1.65	722	3732	0.000190092200532635	0.000972986194602759	0	0.0199	0.0151	0.0151	TRUE	0.0155	Mpv17 transgene, kidney disease mutant-like [Source:MGI Symbol;Acc:MGI:2135951]	16	13903161	13949619	1	Mpv17l	93734
ENSMUSG00000022687	69	67	91	158	178	150	75	66	91	151	167	154	117.22	77	157	2032	1023	5699	1.20842e+06	1.18115e+06	0.0009	0.0156	0.0135	0.0135	TRUE	237	biregional cell adhesion molecule-related/down-regulated by oncogenes (Cdon) binding protein [Source:MGI Symbol;Acc:MGI:2151153]	16	44485049	44558897	-1	Boc	117606
ENSMUSG00000022750	254	308	288	726	746	741	275	303	289	693	698	760	503.14	289	717	2478	1309	13924	4.53308e-31	3.20002e-28	0	0.0047	0.0039	0.0039	TRUE	0.0324	kelch-like 22 [Source:MGI Symbol;Acc:MGI:1337995]	16	17759618	17793382	1	Klhl22	224023
ENSMUSG00000022756	0	2	3	18	11	14	0	2	3	17	10	14	7.8	2	14	8.23	3041	3568	0.000360344103593502	0.00172621014501845	0	214	0.1869	0.1869	TRUE	0.4436	solute carrier family 7 (cationic amino acid transporter, y+ system), member 4 [Source:MGI Symbol;Acc:MGI:2146512]	16	17572018	17583214	-1	Slc7a4	224022
ENSMUSG00000022758	2	4	5	39	22	25	2	4	5	37	21	26	15.76	4	28	7444	2896	4908	9.18667e+07	6.97949e+08	0	0.1066	0.0967	0.0967	TRUE	0.2386	purinergic receptor P2X, ligand-gated ion channel, 6 [Source:MGI Symbol;Acc:MGI:1337113]	16	17561885	17577800	1	P2rx6	18440
ENSMUSG00000022768	14	17	24	50	55	58	15	17	24	48	51	60	35.78	19	53	2825	1498	4592	4.39838e+08	2.9994e+09	0	0.0478	0.0402	0.0402	TRUE	0.3394	coiled-coil domain containing 116 [Source:MGI Symbol;Acc:MGI:1924122]	16	17139064	17147229	-1	Ccdc116	76872
ENSMUSG00000022769	73	78	78	165	148	145	79	77	78	157	139	149	113.15	78	148	1.9	926	5258	1.45571e+07	1.24631e+08	0	0.0161	0.0125	0.0125	TRUE	0.0355	stromal cell-derived factor 2-like 1 [Source:MGI Symbol;Acc:MGI:2149842]	16	17130138	17132383	-1	Sdf2l1	64136
ENSMUSG00000022788	14	17	16	120	124	109	15	17	16	115	116	112	65.06	16	114	7133	2834	10045	9.6649e-10	3.01988e-08	0	0.0269	0.0212	0.0212	TRUE	0.0091	FYVE, RhoGEF and PH domain containing 4 [Source:MGI Symbol;Acc:MGI:2183747]	16	16416917	16600549	-1	Fgd4	224014
ENSMUSG00000022799	159	146	144	269	287	284	172	144	145	257	269	291	212.87	154	272	1776	828	6155	74940.8	850216	0	0.0092	0.0079	0.0079	TRUE	0.1144	Rho GTPase activating protein 31 [Source:MGI Symbol;Acc:MGI:1333857]	16	38598340	38713274	-1	Arhgap31	12549
ENSMUSG00000022805	9	9	15	28	34	26	10	9	15	27	32	27	19.81	11	29	2531	1.34	3129	0.00175313761895683	0.00709255569484049	0	0.0851	0.0695	0.0695	TRUE	0.3434	MYCBP-associated, testis expressed 1 [Source:MGI Symbol;Acc:MGI:2443598]	16	38297754	38342143	-1	Maats1	320214
ENSMUSG00000022816	2039	2261	2221	7141	7199	6215	2207	2227	2230	6814	6739	6377	4432.32	2221	6643	2991	1581	32386	4.37586e-216	3.92489e-213	0.0006	0.0018	0.0014	0.0014	TRUE	0.0149	follistatin-like 1 [Source:MGI Symbol;Acc:MGI:102793]	16	37776873	37836514	1	Fstl1	14314
ENSMUSG00000022817	2456	2805	2657	5079	5297	4223	2658	2763	2668	4846	4959	4333	3704.44	2696	4713	1748	806	14072	5.60754e-31	4.17091e-29	0.0023	0.0019	0.0021	0.0021	TRUE	0.0602	integrin beta 5 [Source:MGI Symbol;Acc:MGI:96614]	16	33829665	33949338	1	Itgb5	16419
ENSMUSG00000022827	115	110	91	214	224	195	124	108	91	204	210	200	156.36	108	205	1898	924	5929	305226	3.22305e+06	0	12	0.0104	0.0104	TRUE	0.1811	RAB, member RAS oncogene family-like 3 [Source:MGI Symbol;Acc:MGI:1914907]	16	37539885	37572385	1	Rabl3	67657
ENSMUSG00000022861	17	10	23	97	95	74	18	10	23	93	89	76	51.46	17	86	5033	2332	7642	2.13808	37.6025	0.0051	0.0336	0.0315	0.0315	TRUE	0.7206	diacylglycerol kinase, gamma [Source:MGI Symbol;Acc:MGI:105060]	16	22468461	22657221	-1	Dgkg	110197
ENSMUSG00000022885	22	29	43	143	148	102	24	29	43	136	139	105	79.2	32	127	3966	1988	8141	0.0391405	0.792581	0.0285	0.0224	0.0231	0.0231	TRUE	0.6614	beta galactoside alpha 2,6 sialyltransferase 1 [Source:MGI Symbol;Acc:MGI:108470]	16	23224740	23360350	1	St6gal1	20440
ENSMUSG00000022887	295	342	342	976	963	828	319	337	343	931	901	850	613.65	333	894	2683	1424	16393	2.1352e-46	2.37646e-44	0	0.0041	0.0034	0.0034	TRUE	0.0223	mannan-binding lectin serine peptidase 1 [Source:MGI Symbol;Acc:MGI:88492]	16	23449417	23520815	-1	Masp1	17174
ENSMUSG00000022893	150	162	153	455	550	437	162	160	154	434	515	448	312.16	159	466	2941	1556	13007	1.11942e-24	6.36901e-23	0	0.0067	6	6	TRUE	0.1001	a disintegrin-like and metallopeptidase (reprolysin type) with thrombospondin type 1 motif, 1 [Source:MGI Symbol;Acc:MGI:109249]	16	85793827	85803113	-1	Adamts1	11504
ENSMUSG00000022894	172	252	244	922	1011	718	186	248	245	880	946	737	540.38	226	854	3767	1914	16.67	2.16475e-48	2.59907e-46	0.0172	0.0045	0.0067	0.0067	TRUE	258	a disintegrin-like and metallopeptidase (reprolysin type) with thrombospondin type 1 motif, 5 (aggrecanase-2) [Source:MGI Symbol;Acc:MGI:1346321]	16	85856173	85901828	-1	Adamts5	23794
ENSMUSG00000022906	135	161	135	352	355	341	146	159	136	336	332	350	243.05	147	339	2311	1209	9575	1.02348e-07	2.89e-06	0	0.0082	0.0066	0.0066	TRUE	0.0537	poly (ADP-ribose) polymerase family, member 9 [Source:MGI Symbol;Acc:MGI:1933117]	16	35938470	35972605	1	Parp9	80285
ENSMUSG00000022912	131	147	137	309	309	295	142	145	138	295	289	303	218.49	142	296	2.09	1064	8214	0.0214185	0.441934	0	9	0.0068	0.0068	TRUE	0.0059	protein S (alpha) [Source:MGI Symbol;Acc:MGI:1095733]	16	62854307	62929346	1	Pros1	19128
ENSMUSG00000022995	729	880	776	1510	1532	1430	789	867	779	1441	1434	1467	1129.52	812	1447	1783	834	12251	1.6525e-20	8.12815e-19	0.0004	0.0029	0.0024	0.0024	TRUE	0.0425	ENAH actin regulator [Source:MGI Symbol;Acc:MGI:108360]	1	181896384	182019990	-1	Enah	13800
ENSMUSG00000023022	1063	1210	1128	1898	1821	1678	1150	1192	1132	1811	1705	1722	1452.04	1158	1746	1507	592	9644	5.23633e-08	1.50648e-06	0	0.0025	2	2	TRUE	13	LIM domain and actin binding 1 [Source:MGI Symbol;Acc:MGI:1920992]	15	99778470	99875456	-1	Lima1	65970
ENSMUSG00000023092	344	375	332	570	575	548	372	369	333	544	538	562	453.24	358	548	1.53	613	6532	6499.81	81976.1	0	0.0051	4	4	TRUE	0.0429	four and a half LIM domains 1 [Source:MGI Symbol;Acc:MGI:1298387]	X	56731787	56793346	1	Fhl1	14199
ENSMUSG00000023106	328	384	321	569	593	686	355	378	322	543	555	704	476.24	352	601	1706	0.77	7011	236.376	349.25	0.0123	0.0049	0.0064	0.0064	TRUE	0.2631	density-regulated protein [Source:MGI Symbol;Acc:MGI:1915434]	5	123907175	123928835	1	Denr	68184
ENSMUSG00000023169	197	246	222	1117	1142	941	213	242	223	1066	1069	966	629.81	226	1034	4567	2191	23343	1.61113e-106	5.84916e-104	0	4	0.0036	0.0036	TRUE	0.0436	solute carrier family 38, member 1 [Source:MGI Symbol;Acc:MGI:2145895]	15	96571418	96642913	-1	Slc38a1	105727
ENSMUSG00000023206	20	24	24	57	60	77	22	24	24	54	56	79	43.16	23	63	2724	1446	4821	1.43188e+08	1.04968e+09	0	0.0398	35	35	TRUE	0.4123	interleukin 15 receptor, alpha chain [Source:MGI Symbol;Acc:MGI:104644]	2	11705290	11734317	1	Il15ra	16169
ENSMUSG00000023249	335	368	361	655	610	657	363	362	362	625	571	674	492.94	362	623	1719	781	8268	0.0136196	0.285655	0.0023	0.0048	0.0042	0.0042	TRUE	0.0641	poly (ADP-ribose) polymerase family, member 3 [Source:MGI Symbol;Acc:MGI:1891258]	9	106470322	106476949	-1	Parp3	235587
ENSMUSG00000023809	208	223	227	359	367	324	225	220	228	343	344	332	281.87	224	340	1515	599	5.31	1.09434e+07	9.50798e+07	0	0.0073	0.0055	0.0055	TRUE	0.0037	ribosomal protein S6 kinase, polypeptide 2 [Source:MGI Symbol;Acc:MGI:1342290]	17	7170115	7303315	1	Rps6ka2	20112
ENSMUSG00000023886	28	27	31	223	162	166	30	27	31	213	152	170	103.8	29	178	6082	2604	11427	3.05227e-16	1.29641e-15	0	0.0174	0.0173	0.0173	TRUE	0.2297	SPARC related modular calcium binding 2 [Source:MGI Symbol;Acc:MGI:1929881]	17	14279506	14404790	1	Smoc2	64074
ENSMUSG00000023915	101	96	89	209	215	200	109	95	89	199	201	205	149.86	98	202	2.07	1049	6712	1924.49	26014.7	0	0.0125	0.01	0.01	TRUE	0.1002	tumor necrosis factor receptor superfamily, member 21 [Source:MGI Symbol;Acc:MGI:2151075]	17	43016555	43089189	1	Tnfrsf21	94185
ENSMUSG00000023927	3	4	3	28	28	23	3	4	3	27	26	24	14.45	3	26	7496	2906	4828	1.38e+08	1.01949e+09	0	0.1162	92	92	TRUE	0.0297	special AT-rich sequence binding protein 1 [Source:MGI Symbol;Acc:MGI:105084]	17	51736187	51833290	-1	Satb1	20230
ENSMUSG00000023999	17	28	16	56	60	49	18	28	16	53	56	50	36.99	21	53	2572	1363	4284	1.83901e+09	0.000112434522526462	0	0.0463	0.0392	0.0392	TRUE	0.4864	kinesin family member 6 [Source:MGI Symbol;Acc:MGI:1098238]	17	49615136	49909847	1	Kif6	319991
ENSMUSG00000024043	215	252	308	538	541	451	233	248	309	513	506	463	378.78	263	494	1875	907	8043	0.00878816	1.74255	9	0.0058	0.0062	0.0062	TRUE	0.2598	Rho GTPase activating protein 28 [Source:MGI Symbol;Acc:MGI:2147003]	17	67842713	68004120	-1	Arhgap28	268970
ENSMUSG00000024063	240	261	255	453	474	429	260	257	256	432	444	440	348.17	258	439	1703	768	7444	9.74908	162.286	0	0.0062	0.0046	0.0046	TRUE	2	limb-bud and heart [Source:MGI Symbol;Acc:MGI:1925139]	17	72918305	72941947	1	Lbh	77889
ENSMUSG00000024085	599	719	704	1135	1278	1053	648	708	707	1083	1196	1080	903.85	688	1120	1628	703	9286	1.60186e-06	4.26152e-05	0.0019	0.0032	3	3	TRUE	0.0431	mannosidase 2, alpha 1 [Source:MGI Symbol;Acc:MGI:104669]	17	64600736	64755110	1	Man2a1	17158
ENSMUSG00000024127	352	406	343	772	774	721	381	400	344	737	725	740	554.37	375	734	1956	968	10.92	9.20273e-14	3.55248e-12	0	0.0044	0.0036	0.0036	TRUE	0.0598	prolyl endopeptidase-like [Source:MGI Symbol;Acc:MGI:2441932]	17	85063470	85090241	-1	Prepl	213760
ENSMUSG00000024176	2	2	2	15	8	13	2	2	2	14	7	13	6.88	2	11	5719	2516	3045	0.00232547483175499	0.00909434219917929	0	0.2425	0.2003	0.2003	TRUE	0.4128	SRY (sex determining region Y)-box 8 [Source:MGI Symbol;Acc:MGI:98370]	17	25565892	25570686	-1	Sox8	20681
ENSMUSG00000024177	97	100	73	163	159	123	105	98	73	156	149	126	117.89	92	144	1559	641	3521	0.000429254352574824	0.0020164697358118	12	0.0155	0.0149	0.0149	TRUE	0.3131	NME/NM23 nucleoside diphosphate kinase 4 [Source:MGI Symbol;Acc:MGI:1931148]	17	26091734	26095602	-1	Nme4	56520
ENSMUSG00000024238	1031	1116	1279	2091	2146	1846	1116	1099	1284	1995	2009	1894	1566.24	1166	1966	1686	753	11069	1.77786e-14	7.07803e-13	0.0033	0.0025	0.0027	0.0027	TRUE	94	zinc finger E-box binding homeobox 1 [Source:MGI Symbol;Acc:MGI:1344313]	18	5591860	5775467	1	Zeb1	21417
ENSMUSG00000024268	8	7	10	40	34	41	9	7	10	38	32	42	22.94	9	37	4378	2.13	4958	7.10442e+07	5.47389e+08	0	0.0737	0.06	0.06	TRUE	0.1272	CUGBP, Elav-like family member 4 [Source:MGI Symbol;Acc:MGI:1932407]	18	25477632	25754157	-1	Celf4	108013
ENSMUSG00000024330	83	102	110	206	197	179	90	100	110	197	184	184	144.23	100	188	1876	907	5726	1.02556e+06	1.01215e+07	0	0.0129	0.0104	0.0104	TRUE	77	collagen, type XI, alpha 2 [Source:MGI Symbol;Acc:MGI:88447]	17	34039437	34066685	1	Col11a2	12815
ENSMUSG00000024349	7	9	5	20	27	19	8	9	5	19	25	19	14.22	7	21	2979	1575	3068	0.00215682531351546	0.0085156065200631	0	0.1181	0.0956	0.0956	TRUE	0.1891	stimulator of interferon response cGAMP interactor 1 [Source:MGI Symbol;Acc:MGI:1919762]	18	35733679	35740554	-1	Sting1	72512
ENSMUSG00000024420	44	44	58	183	184	151	48	43	58	175	172	155	108.5	50	167	3365	1751	9004	2.16717e-05	0.000540835	0	0.0167	0.0141	0.0141	TRUE	0.1858	zinc finger protein 521 [Source:MGI Symbol;Acc:MGI:95459]	18	13687013	13972787	-1	Zfp521	225207
ENSMUSG00000024529	1	2	0	9	13	12	1	2	0	9	12	12	6.02	1	11	10.79	3432	3305	0.000948908484609849	0.0041093316027637	0	277	0.2321	0.2321	TRUE	0.3775	lysyl oxidase [Source:MGI Symbol;Acc:MGI:96817]	18	52516067	52529867	-1	Lox	16948
ENSMUSG00000024538	808	980	857	1578	1442	1295	875	965	860	1506	1350	1329	1147.42	900	1395	1.55	632	8574	0.000998288	0.0226854	0.0035	0.0029	3	3	TRUE	0.0584	peptidylprolyl isomerase C [Source:MGI Symbol;Acc:MGI:97751]	18	53406332	53418115	-1	Ppic	19038
ENSMUSG00000024544	437	560	668	1248	1163	1039	473	552	671	1191	1089	1066	840.14	565	1115	1972	0.98	10023	1.20754e-10	3.75765e-08	0.0153	0.0034	0.0055	0.0055	TRUE	0.3126	low density lipoprotein receptor class A domain containing 4 [Source:MGI Symbol;Acc:MGI:1277150]	18	67933257	68268630	1	Ldlrad4	52662
ENSMUSG00000024558	1	2	3	30	18	14	1	2	3	29	17	14	10.98	2	20	9797	3292	4343	1.40461e+09	8.7669e+09	0	0.1524	0.1391	0.1391	TRUE	0.8084	mitogen-activated protein kinase 4 [Source:MGI Symbol;Acc:MGI:2444559]	18	73928486	74065359	-1	Mapk4	225724
ENSMUSG00000024594	365	384	381	665	601	591	395	378	383	635	563	606	493.22	385	601	1561	642	7005	247.628	3644.63	0	0.0048	0.0039	0.0039	TRUE	0.0378	proline-rich coiled-coil 1 [Source:MGI Symbol;Acc:MGI:1916106]	18	57354741	57392956	1	Prrc1	73137
ENSMUSG00000024598	0	0	1	47	52	36	0	0	1	45	49	37	21.91	0	44	118805	6892	5636	17372.2	1.66703e+07	0	0.0771	0.0665	0.0665	TRUE	0.4083	fibrillin 2 [Source:MGI Symbol;Acc:MGI:95490]	18	58008623	58210487	-1	Fbn2	14119
ENSMUSG00000024642	20	18	11	94	112	95	22	18	11	90	105	97	57.07	17	97	5.82	2541	8656	0.000490346	0.0112772	0	0.0305	0.0266	0.0266	TRUE	0.4439	transducin-like enhancer of split 4 [Source:MGI Symbol;Acc:MGI:104633]	19	14448150	14598051	-1	Tle4	21888
ENSMUSG00000024665	1339	1476	1355	2291	2470	2182	1449	1454	1360	2186	2312	2239	1833.43	1421	2246	1581	0.66	11349	7.53341e-16	3.13851e-14	0.0005	0.0023	0.0019	0.0019	TRUE	0.0169	fatty acid desaturase 2 [Source:MGI Symbol;Acc:MGI:1930079]	19	10062765	10101746	-1	Fads2	56473
ENSMUSG00000024736	352	366	381	651	697	586	381	360	383	621	652	601	499.82	375	625	1669	739	8195	0.0249826	0.514083	0	0.0047	0.0037	0.0037	TRUE	0.0176	transmembrane protein 132A [Source:MGI Symbol;Acc:MGI:2147810]	19	10857822	10869940	-1	Tmem132a	98170
ENSMUSG00000024769	33	49	51	101	82	72	36	48	51	96	77	74	63.7	45	82	1824	867	3597	0.000321731567842376	0.00155837450649954	0.0096	0.0275	0.0246	0.0246	TRUE	0.2437	CDC42 binding protein kinase gamma (DMPK-like) [Source:MGI Symbol;Acc:MGI:2652845]	19	6306456	6325652	1	Cdc42bpg	240505
ENSMUSG00000024778	136	146	158	435	419	404	147	144	159	415	392	415	278.58	150	407	2717	1442	12019	2.81173e-19	1.32325e-17	0	0.0074	0.0058	0.0058	TRUE	0.0279	Fas (TNF receptor superfamily member 6) [Source:MGI Symbol;Acc:MGI:95484]	19	34290666	34327772	1	Fas	14102
ENSMUSG00000024803	16	18	11	337	339	350	17	18	11	322	317	359	174.02	15	333	21685	4439	17876	1.7981e-57	2.71459e-55	0	0.0109	0.0096	0.0096	TRUE	0.2873	ankyrin repeat domain 1 (cardiac muscle) [Source:MGI Symbol;Acc:MGI:1097717]	19	36111961	36120099	-1	Ankrd1	107765
ENSMUSG00000024887	60	84	74	185	201	144	65	83	74	177	188	148	122.4	74	171	2307	1206	6707	1986.96	26787.9	0.0064	15	0.0136	0.0136	TRUE	0.1459	N-acylsphingosine amidohydrolase 2 [Source:MGI Symbol;Acc:MGI:1859310]	19	31982597	32108211	-1	Asah2	54447
ENSMUSG00000024899	37	39	45	138	131	121	40	38	45	132	123	124	83.68	41	126	3061	1614	7555	4.18721	7.14168	0	0.0212	0.0166	0.0166	TRUE	55	3'-phosphoadenosine 5'-phosphosulfate synthase 2 [Source:MGI Symbol;Acc:MGI:1330223]	19	32595790	32667187	1	Papss2	23972
ENSMUSG00000024913	43	56	52	187	193	149	47	55	52	178	181	153	110.98	51	171	3324	1733	9049	1.44591e-05	0.000365625	0	0.0164	0.0136	0.0136	TRUE	0.0869	low density lipoprotein receptor-related protein 5 [Source:MGI Symbol;Acc:MGI:1278315]	19	3584828	3686564	-1	Lrp5	16973
ENSMUSG00000024921	150	143	166	394	473	384	162	141	167	376	443	394	280.44	157	404	2584	1.37	10992	4.19444e-14	1.64837e-12	4	0.0073	0.0067	0.0067	TRUE	0.0842	SWI/SNF related, matrix associated, actin dependent regulator of chromatin, subfamily a, member 2 [Source:MGI Symbol;Acc:MGI:99603]	19	26605050	26778322	1	Smarca2	67155
ENSMUSG00000024998	215	246	313	559	581	496	233	242	314	533	544	509	395.91	263	529	2009	1006	8966	3.06367e-05	0.000757129	0.0095	0.0056	0.0062	0.0062	TRUE	0.3249	phospholipase C, epsilon 1 [Source:MGI Symbol;Acc:MGI:1921305]	19	38481109	38785030	1	Plce1	74055
ENSMUSG00000025006	62	79	82	162	161	126	67	78	82	155	151	129	110.3	76	145	1911	935	5131	2.88248e+07	2.35794e+07	0	0.0164	0.0138	0.0138	TRUE	0.0902	sorbin and SH3 domain containing 1 [Source:MGI Symbol;Acc:MGI:700014]	19	40294753	40513779	-1	Sorbs1	20411
ENSMUSG00000025064	0	0	1	7	11	7	0	0	1	7	10	7	4.19	0	8	22001	4.46	3205	0.00135017333227742	0.00564348765640518	0	397	0.3349	0.3349	TRUE	0.4083	collagen, type XVII, alpha 1 [Source:MGI Symbol;Acc:MGI:88450]	19	47646344	47692094	-1	Col17a1	12821
ENSMUSG00000025151	1650	1820	1690	3166	3117	2846	1786	1792	1697	3021	2918	2920	2355.7	1758	2953	1.68	748	13971	2.33058e-30	1.66839e-28	0	0.0021	0.0016	0.0016	TRUE	0.0114	melanoma antigen, family D, 1 [Source:MGI Symbol;Acc:MGI:1930187]	X	94535474	94542143	-1	Maged1	94275
ENSMUSG00000025189	0	1	3	56	59	53	0	1	3	53	55	54	27.84	1	54	39.94	5.32	6843	775.322	10786.6	0	61	0.0511	0.0511	TRUE	0.7341	cyclin M1 [Source:MGI Symbol;Acc:MGI:1891366]	19	43440436	43497210	1	Cnnm1	83674
ENSMUSG00000025192	218	250	240	398	416	326	236	246	241	380	389	335	304.47	241	368	1527	611	5413	6.19097e+06	5.5562e+07	0	0.0069	0.0057	0.0057	TRUE	0.0709	ectonucleoside triphosphate diphosphohydrolase 7 [Source:MGI Symbol;Acc:MGI:2135885]	19	43689672	43733697	1	Entpd7	93685
ENSMUSG00000025245	212	199	211	320	353	317	229	196	212	305	330	325	266.39	212	320	1.51	594	5	5.74189e+07	4.50372e+08	0	0.0076	0.0063	0.0063	TRUE	0.0523	leucine zipper transcription factor-like 1 [Source:MGI Symbol;Acc:MGI:1934860]	9	123694416	123717697	-1	Lztfl1	93730
ENSMUSG00000025265	341	384	397	693	745	655	369	378	399	661	697	672	529.44	382	677	1772	825	9389	6.05941e-07	1.64695e-05	0	0.0045	0.0035	0.0035	TRUE	0.0167	FYVE, RhoGEF and PH domain containing 1 [Source:MGI Symbol;Acc:MGI:104566]	X	151046150	151089521	1	Fgd1	14163
ENSMUSG00000025268	144	158	125	253	273	240	156	156	125	241	256	246	196.7	146	248	1702	767	5538	3.05144e+06	2.83709e+07	0	0.0098	0.0084	0.0084	TRUE	0.1546	melanoma antigen, family D, 2 [Source:MGI Symbol;Acc:MGI:1933391]	X	150806370	150814345	-1	Maged2	80884
ENSMUSG00000025348	134	149	152	371	417	292	145	147	153	354	390	300	248.06	148	348	2351	1234	9246	2.32167e-06	6.13532e-05	0.0075	0.0081	8	8	TRUE	0.1662	integrin alpha 7 [Source:MGI Symbol;Acc:MGI:102700]	10	128933818	128958282	1	Itga7	16404
ENSMUSG00000025352	80	82	85	145	161	144	87	81	85	138	151	148	114.92	84	146	1.73	0.79	4567	4.94276e+08	3.33827e+09	0	0.0158	0.0122	0.0122	TRUE	0.0202	growth differentiation factor 11 [Source:MGI Symbol;Acc:MGI:1338027]	10	128882295	128891718	-1	Gdf11	14561
ENSMUSG00000025355	23	25	16	131	85	70	25	25	16	125	80	72	57	22	92	4226	2079	6.96	340.431	4934.31	0.0586	0.0305	0.0356	0.0356	TRUE	0.9484	matrix metallopeptidase 19 [Source:MGI Symbol;Acc:MGI:1927899]	10	128790910	128800824	1	Mmp19	58223
ENSMUSG00000025366	232	364	317	584	600	485	251	358	318	557	562	498	424.07	309	539	1.74	799	6995	265.31	3889.85	0.0138	0.0053	0.0068	0.0068	TRUE	0.2988	extended synaptotagmin-like protein 1 [Source:MGI Symbol;Acc:MGI:1344426]	10	128509965	128525871	-1	Esyt1	23943
ENSMUSG00000025381	323	351	302	606	499	502	350	346	303	578	467	515	426.49	333	520	1563	645	6.09	112774	1.25083e+06	0.0068	0.0053	0.0056	0.0056	TRUE	113	canopy FGF signaling regulator 2 [Source:MGI Symbol;Acc:MGI:1928477]	10	128322459	128327553	1	Cnpy2	56530
ENSMUSG00000025429	14	21	24	90	71	75	15	21	24	86	66	77	48.21	20	76	3.81	1.93	6541	6125.53	77383.6	0	0.0358	0.0309	0.0309	TRUE	0.2025	proline-serine-threonine phosphatase-interacting protein 2 [Source:MGI Symbol;Acc:MGI:1335088]	18	77789914	77882879	1	Pstpip2	19201
ENSMUSG00000025475	5	7	9	29	23	26	5	7	9	28	22	27	16.2	7	26	3.54	1824	3709	0.000208391720416407	0.00105321741892919	0	0.1038	0.0835	0.0835	TRUE	0.1499	adhesion G protein-coupled receptor A1 [Source:MGI Symbol;Acc:MGI:1277167]	7	139834174	139878088	1	Adgra1	52389
ENSMUSG00000025534	416	463	445	790	800	635	450	456	447	754	749	652	584.55	451	718	1593	672	7605	2.85727	49.5087	0.0023	0.0042	0.0038	0.0038	TRUE	0.0765	glucuronidase, beta [Source:MGI Symbol;Acc:MGI:95872]	5	129989011	130003049	-1	Gusb	110006
ENSMUSG00000025551	5	10	16	36	46	31	5	10	16	34	43	32	23.42	10	36	3467	1794	4239	2.24975e+09	0.000135536071230866	0.0222	0.0722	0.0671	0.0671	TRUE	0.7885	fibroblast growth factor 14 [Source:MGI Symbol;Acc:MGI:109189]	14	123977907	124677127	-1	Fgf14	14169
ENSMUSG00000025592	16	18	25	108	116	83	17	18	25	103	109	85	59.49	20	99	4932	2302	8262	0.014351	0.30017	0	0.0293	0.0256	0.0256	TRUE	0.2664	dachshund family transcription factor 2 [Source:MGI Symbol;Acc:MGI:1890446]	X	113297510	113836386	1	Dach2	93837
ENSMUSG00000025650	26	15	28	77	59	71	28	15	28	73	55	73	45.43	24	67	2846	1509	5007	5.52415e+07	4.34635e+08	0.0267	0.0379	0.0365	0.0365	TRUE	0.6669	collagen, type VII, alpha 1 [Source:MGI Symbol;Acc:MGI:88462]	9	108953586	108984875	1	Col7a1	12836
ENSMUSG00000025656	55	79	77	126	139	130	60	78	77	120	130	133	99.73	72	128	1783	834	4395	1.10872e+09	7.05289e+08	0	18	0.0151	0.0151	TRUE	186	CDC42 guanine nucleotide exchange factor (GEF) 9 [Source:MGI Symbol;Acc:MGI:2442233]	X	95048935	95196856	-1	Arhgef9	236915
ENSMUSG00000025666	314	356	299	530	549	497	340	351	300	506	514	510	420.05	330	510	1544	627	6393	16305.5	199700	0	0.0054	0.0044	0.0044	TRUE	0.0729	transmembrane protein 47 [Source:MGI Symbol;Acc:MGI:2177570]	X	81070698	81097872	1	Tmem47	192216
ENSMUSG00000025743	663	686	705	1230	1201	1141	718	676	708	1174	1124	1171	928.29	701	1156	1651	724	10252	1.16152e-10	3.8088e-09	0	0.0032	0.0024	0.0024	TRUE	0.0114	syndecan 3 [Source:MGI Symbol;Acc:MGI:1349163]	4	130792537	130826319	1	Sdc3	20970
ENSMUSG00000025809	3217	3599	3389	6904	7288	6264	3482	3544	3403	6588	6823	6427	5044.45	3476	6613	1902	928	19.81	2.44339e-73	5.24744e-71	0.0005	0.0017	0.0014	0.0014	TRUE	0.0094	integrin beta 1 (fibronectin receptor beta) [Source:MGI Symbol;Acc:MGI:96610]	8	128685654	128733200	1	Itgb1	16412
ENSMUSG00000025931	29	13	17	67	76	50	31	13	17	64	71	51	41.27	20	62	3073	1.62	4961	7.02909e+07	5.42407e+08	0.0606	0.0416	0.0438	0.0438	TRUE	11434	progestin and adipoQ receptor family member VIII [Source:MGI Symbol;Acc:MGI:1921479]	1	20890606	20939650	1	Paqr8	74229
ENSMUSG00000025932	31	29	41	452	512	424	34	29	41	431	479	435	241.49	35	448	13038	3705	20626	1.60223e-80	3.8779e-78	0	0.0083	0.0073	0.0073	TRUE	0.2149	EYA transcriptional coactivator and phosphatase 1 [Source:MGI Symbol;Acc:MGI:109344]	1	14168954	14310235	-1	Eya1	14048
ENSMUSG00000025940	230	213	252	454	542	448	249	210	253	433	507	460	352	237	467	1.97	978	8685	0.000378716	0.00876275	0.0051	0.0061	0.0059	0.0059	TRUE	116	transmembrane protein 70 [Source:MGI Symbol;Acc:MGI:1915068]	1	16665207	16678275	1	Tmem70	70397
ENSMUSG00000025959	390	492	521	875	837	799	422	485	523	835	784	820	644.68	477	813	1703	768	8.71	0.000303361	0.00708368	0.0037	4	0.0039	0.0039	TRUE	0.1132	Kruppel-like factor 7 (ubiquitous) [Source:MGI Symbol;Acc:MGI:1935151]	1	64029447	64122282	-1	Klf7	93691
ENSMUSG00000025964	7	3	8	25	26	15	8	3	8	24	24	15	13.69	6	21	3452	1787	3279	0.0010411672022603	0.00447329318119614	0	0.1226	0.1082	0.1082	TRUE	0.5304	a disintegrin and metallopeptidase domain 23 [Source:MGI Symbol;Acc:MGI:1345162]	1	63445891	63596276	1	Adam23	23792
ENSMUSG00000025978	212	176	189	309	339	303	229	173	190	295	317	311	252.61	197	308	1561	642	5044	4.55374e+06	3.6202e+08	0.0051	8	0.0075	0.0075	TRUE	0.2117	raftlin family member 2 [Source:MGI Symbol;Acc:MGI:1921263]	1	55170159	55226782	-1	Rftn2	74013
ENSMUSG00000025997	68	54	72	131	185	117	74	53	72	125	173	120	102.88	66	139	2107	1076	5222	1.77258e+07	1.49163e+08	0.0277	0.0175	0.0194	0.0194	TRUE	0.4741	IKAROS family zinc finger 2 [Source:MGI Symbol;Acc:MGI:1342541]	1	69531214	69687245	-1	Ikzf2	22779
ENSMUSG00000026042	6352	6934	7032	22601	23839	21370	6875	6829	7060	21566	22317	21928	14429.04	6921	21937	3169	1664	41172	0	0	0.0002	0.0015	0.0011	0.0011	TRUE	0.0038	collagen, type V, alpha 2 [Source:MGI Symbol;Acc:MGI:88458]	1	45374321	45503282	-1	Col5a2	12832
ENSMUSG00000026043	4740	5150	5182	17452	18149	14805	5130	5072	5203	16653	16990	15191	10706.51	5135	16278	3.17	1665	33537	1.39791e-232	1.33221e-229	0.0016	0.0016	0.0016	0.0016	TRUE	0.0416	collagen, type III, alpha 1 [Source:MGI Symbol;Acc:MGI:88453]	1	45311538	45349706	1	Col3a1	12825
ENSMUSG00000026069	299	348	280	845	946	805	324	343	281	806	886	826	577.56	316	839	2658	1.41	15109	1.40664e-39	1.27669e-35	0.0029	0.0043	0.0041	0.0041	TRUE	0.1065	interleukin 1 receptor-like 1 [Source:MGI Symbol;Acc:MGI:98427]	1	40429570	40465415	1	Il1rl1	17082
ENSMUSG00000026080	3	9	11	48	61	53	3	9	11	46	57	54	30.07	8	52	6718	2748	6593	4321.9	55753.3	0	0.0566	0.0504	0.0504	TRUE	0.6595	carbohydrate sulfotransferase 10 [Source:MGI Symbol;Acc:MGI:2138283]	1	38863867	38898161	-1	Chst10	98388
ENSMUSG00000026207	292	337	304	724	728	669	316	332	305	691	682	686	501.99	318	686	2.16	1111	12276	1.21659e-21	6.02292e-19	0	0.0047	0.0036	0.0036	TRUE	0.0178	SPEG complex locus [Source:MGI Symbol;Acc:MGI:109282]	1	75375297	75432320	1	Speg	11790
ENSMUSG00000026211	199	265	251	572	567	512	215	261	252	546	531	525	388.39	243	534	2196	1135	10874	1.53414e-13	5.81904e-12	0	0.0057	0.0048	0.0048	TRUE	0.1045	obscurin-like 1 [Source:MGI Symbol;Acc:MGI:2138628]	1	75479310	75506452	-1	Obsl1	98733
ENSMUSG00000026308	156	156	136	348	374	288	169	154	137	332	350	296	239.45	153	326	2134	1094	8311	0.00946075	0.201477	0.0043	0.0083	0.0076	0.0076	TRUE	93	kelch-like 30 [Source:MGI Symbol;Acc:MGI:1918038]	1	91351016	91362416	1	Klhl30	70788
ENSMUSG00000026383	71	95	101	147	147	129	77	94	101	140	138	132	113.68	91	137	1507	592	3352	0.000803295334057089	0.00355136191757103	0	16	0.0133	0.0133	TRUE	0.1614	erythrocyte membrane protein band 4.1 like 5 [Source:MGI Symbol;Acc:MGI:103006]	1	119545037	119649000	-1	Epb41l5	226352
ENSMUSG00000026414	83	64	70	207	204	241	90	63	70	198	191	247	143.15	74	212	2855	1513	8504	0.00183726	0.00413194	0.0169	13	0.0136	0.0136	TRUE	0.2902	troponin T2, cardiac [Source:MGI Symbol;Acc:MGI:104597]	1	135836354	135852260	1	Tnnt2	21956
ENSMUSG00000026421	669	660	617	1474	1454	1478	724	650	619	1407	1361	1517	1046.29	664	1428	2.15	1104	14495	1.31236e-33	1.04769e-31	0.0032	3	0.0031	0.0031	TRUE	71	cysteine and glycine-rich protein 1 [Source:MGI Symbol;Acc:MGI:88549]	1	135720061	135752232	1	Csrp1	13007
ENSMUSG00000026458	4	3	2	14	18	13	4	3	2	13	17	13	8.81	3	14	4724	2.24	3208	0.00133444344205344	0.00558999824297552	0	0.1898	0.1516	0.1516	TRUE	0.1471	protein tyrosine phosphatase, receptor type, f polypeptide (PTPRF), interacting protein (liprin), alpha 4 [Source:MGI Symbol;Acc:MGI:1915757]	1	134296783	134332928	-1	Ppfia4	68507
ENSMUSG00000026463	35	37	45	331	344	236	38	36	45	316	322	242	166.59	40	293	7369	2881	15018	5.59778e-37	4.84972e-35	0	0.0114	12	12	TRUE	0.2589	ATPase, Ca++ transporting, plasma membrane 4 [Source:MGI Symbol;Acc:MGI:88111]	1	133699457	133801041	-1	Atp2b4	381290
ENSMUSG00000026471	50	48	48	94	100	67	54	47	48	90	94	69	66.94	50	84	1.69	757	3276	0.00105150951424644	0.00451010325547951	0	0.0262	0.0224	0.0224	TRUE	0.2322	major histocompatibility complex, class I-related [Source:MGI Symbol;Acc:MGI:1195463]	1	155127277	155146814	-1	Mr1	15064
ENSMUSG00000026478	3103	3861	3733	6248	6303	5401	3358	3803	3748	5962	5900	5542	4718.86	3636	5801	1595	674	12.06	1.72613e-19	8.17393e-18	0.0026	0.0018	2	2	TRUE	0.0539	laminin, gamma 1 [Source:MGI Symbol;Acc:MGI:99914]	1	153218922	153332786	-1	Lamc1	226519
ENSMUSG00000026490	1379	1607	1636	3104	3188	2969	1493	1583	1643	2962	2984	3046	2285.07	1573	2997	1905	0.93	16693	1.46284e-48	1.77026e-46	0.0005	0.0021	0.0017	0.0017	TRUE	0.0235	CDC42 binding protein kinase alpha [Source:MGI Symbol;Acc:MGI:2441841]	1	179960472	180165603	1	Cdc42bpa	226751
ENSMUSG00000026494	258	282	320	1853	1813	1563	279	278	321	1768	1697	1604	991.23	293	1690	5771	2529	30508	2.01287e-190	1.3951e-187	0.0021	0.0031	0.0029	0.0029	TRUE	0.0828	kinesin family member 26B [Source:MGI Symbol;Acc:MGI:2447076]	1	178529125	178939200	1	Kif26b	269152
ENSMUSG00000026499	438	491	478	889	906	812	474	484	480	848	848	833	661.19	479	843	1.76	815	10313	6.1627e-11	2.04725e-09	0	0.0039	0.0029	0.0029	TRUE	0.0013	acyl-Coenzyme A binding domain containing 3 [Source:MGI Symbol;Acc:MGI:2181074]	1	180726043	180754204	1	Acbd3	170760
ENSMUSG00000026509	1447	1578	1472	2710	2586	2495	1566	1554	1478	2586	2421	2560	2027.49	1533	2522	1646	719	12586	2.52264e-22	1.3173e-20	0.0007	0.0022	0.0018	0.0018	TRUE	0.0151	calpain 2 [Source:MGI Symbol;Acc:MGI:88264]	1	182467260	182517608	-1	Capn2	12334
ENSMUSG00000026510	154	167	169	289	314	221	167	164	170	276	294	227	216.22	167	266	1592	671	4927	8.36544e+07	6.40021e+08	6	0.0091	0.0085	0.0085	TRUE	0.1786	transformation related protein 53 binding protein 2 [Source:MGI Symbol;Acc:MGI:2138319]	1	182409172	182462432	1	Trp53bp2	209456
ENSMUSG00000026511	194	180	177	321	285	283	210	177	178	306	267	290	238.07	188	288	1.53	614	4805	1.54959e+08	1.12985e+09	0.0024	0.0084	0.0074	0.0074	TRUE	106	signal recognition particle 9 [Source:MGI Symbol;Acc:MGI:1350930]	1	182124737	182132407	1	Srp9	27058
ENSMUSG00000026516	637	684	644	1099	1172	1108	689	674	647	1049	1097	1137	882.06	670	1094	1634	708	9691	3.30426e-08	9.63354e-07	0	0.0033	0.0026	0.0026	TRUE	0.0159	nuclear VCP-like [Source:MGI Symbol;Acc:MGI:1914709]	1	181087138	181144204	-1	Nvl	67459
ENSMUSG00000026519	314	359	373	699	691	539	340	354	374	667	647	553	489.14	356	622	1749	806	8193	0.0255811	0.525689	0.0046	0.0048	0.0048	0.0048	TRUE	0.1098	transmembrane protein 63a [Source:MGI Symbol;Acc:MGI:2384789]	1	180942344	180975112	1	Tmem63a	208795
ENSMUSG00000026547	1811	1983	1731	3307	3133	3301	1960	1953	1738	3156	2933	3387	2521.09	1884	3159	1677	746	11382	5.12726e-16	2.15968e-15	0.0042	0.0021	0.0027	0.0027	TRUE	0.0556	transgelin 2 [Source:MGI Symbol;Acc:MGI:1312985]	1	172500047	172507380	1	Tagln2	21346
ENSMUSG00000026553	2480	2915	2660	5024	5105	4498	2684	2871	2671	4794	4779	4615	3735.65	2742	4729	1725	786	15651	3.26488e-41	3.19121e-39	0.0006	0.0019	0.0015	0.0015	TRUE	0.0207	coatomer protein complex subunit alpha [Source:MGI Symbol;Acc:MGI:1334462]	1	172082529	172122330	1	Copa	12847
ENSMUSG00000026568	152	151	143	254	293	248	165	149	144	242	274	254	204.65	153	257	1.69	757	5628	182617	1.74689e+07	0	0.0095	0.0078	0.0078	TRUE	0.0502	mitochondrial pyruvate carrier 2 [Source:MGI Symbol;Acc:MGI:1917706]	1	165460637	165481214	1	Mpc2	70456
ENSMUSG00000026576	58	40	33	352	385	346	63	39	33	336	360	355	197.77	45	350	7828	2969	16.71	1.11094e-48	1.3661e-47	0.0167	0.0098	0.0099	0.0099	TRUE	0.8737	ATPase, Na+/K+ transporting, beta 1 polypeptide [Source:MGI Symbol;Acc:MGI:88108]	1	164437109	164458355	-1	Atp1b1	11931
ENSMUSG00000026577	155	150	138	313	297	271	168	148	139	299	278	278	218.13	152	285	1885	915	6933	41.242	5915.88	0	9	0.0075	0.0075	TRUE	0.0911	basic leucine zipper nuclear factor 1 [Source:MGI Symbol;Acc:MGI:1201607]	1	164289800	164307489	-1	Blzf1	66352
ENSMUSG00000026584	194	237	210	338	372	318	210	233	211	323	348	326	275.21	218	332	1524	607	5225	1.74483e+07	1.47234e+08	0	0.0074	0.0059	0.0059	TRUE	0.0423	SCY1-like 3 (S. cerevisiae) [Source:MGI Symbol;Acc:MGI:1921385]	1	163929100	163955126	1	Scyl3	240880
ENSMUSG00000026589	10	12	7	158	176	151	11	12	7	151	165	155	83.36	10	157	15874	3989	12572	2.99313e-22	1.55235e-20	0	0.0213	0.0177	0.0177	TRUE	0.2277	SEC16 homolog B (S. cerevisiae) [Source:MGI Symbol;Acc:MGI:2148802]	1	157506728	157568425	1	Sec16b	89867
ENSMUSG00000026608	408	428	378	717	671	597	442	422	380	684	628	613	527.92	415	642	1.55	633	6.85	737.345	10291.3	0.0025	0.0045	0.0042	0.0042	TRUE	0.0621	potassium channel tetramerisation domain containing 3 [Source:MGI Symbol;Acc:MGI:2444629]	1	188971095	189007841	-1	Kctd3	226823
ENSMUSG00000026617	283	339	345	492	547	511	306	334	346	469	512	524	415.4	329	502	1525	609	6124	91080.5	1.02268e+06	0	0.0054	0.0046	0.0046	TRUE	0.0397	bisphosphate 3'-nucleotidase 1 [Source:MGI Symbol;Acc:MGI:1338800]	1	185332149	185357777	1	Bpnt1	23827
ENSMUSG00000026620	64	73	67	192	196	192	69	72	67	183	183	197	128.69	69	188	2703	1435	8.4	0.00444885	0.0973258	0	0.0143	0.0111	0.0111	TRUE	0.0191	MAP/microtubule affinity regulating kinase 1 [Source:MGI Symbol;Acc:MGI:2664902]	1	184896789	184999570	-1	Mark1	226778
ENSMUSG00000026623	778	869	821	1258	1434	1337	842	856	824	1200	1342	1372	1072.81	841	1305	1552	634	8808	0.000127524	0.00302409	0.0021	3	0.0028	0.0028	TRUE	0.0592	lysophosphatidylglycerol acyltransferase 1 [Source:MGI Symbol;Acc:MGI:2446186]	1	191717834	191784255	1	Lpgat1	226856
ENSMUSG00000026628	62	70	73	250	235	196	67	69	73	239	220	201	144.83	70	220	3152	1656	9899	4.22118e-09	1.28472e-07	0	0.0129	0.0106	0.0106	TRUE	0.0606	activating transcription factor 3 [Source:MGI Symbol;Acc:MGI:109384]	1	191170296	191218039	-1	Atf3	11910
ENSMUSG00000026659	152	209	163	275	312	291	165	206	164	262	292	299	231.18	178	284	1595	674	5081	3.75902e+06	3.02372e+08	0.0056	0.0086	0.0081	0.0081	TRUE	0.2042	dual specificity phosphatase 12 [Source:MGI Symbol;Acc:MGI:1890614]	1	170873498	170885540	-1	Dusp12	80915
ENSMUSG00000026663	844	856	901	1459	1441	1216	913	843	905	1392	1349	1248	1108.33	887	1330	1.5	585	8313	0.0093432	0.199252	0.0017	0.0029	0.0026	0.0026	TRUE	0.0344	activating transcription factor 6 [Source:MGI Symbol;Acc:MGI:1926157]	1	170704674	170867771	-1	Atf6	226641
ENSMUSG00000026670	418	499	380	780	826	744	452	491	382	744	773	763	601.05	442	760	1721	783	8438	0.00323066	0.0714965	0.0055	0.0042	0.0044	0.0044	TRUE	0.1673	UDP-N-acetylglucosamine pyrophosphorylase 1 [Source:MGI Symbol;Acc:MGI:1334459]	1	170141938	170174957	-1	Uap1	107652
ENSMUSG00000026675	181	206	197	602	662	509	196	203	198	574	620	522	385.5	199	572	2878	1525	14011	1.33661e-30	9.75152e-29	0	0.0057	0.0051	0.0051	TRUE	0.0672	hydroxysteroid (17-beta) dehydrogenase 7 [Source:MGI Symbol;Acc:MGI:1330808]	1	169949535	169969241	-1	Hsd17b7	15490
ENSMUSG00000026676	13	11	28	84	65	50	14	11	28	80	61	51	40.89	18	64	3626	1858	5429	5.67363e+06	5.11599e+07	0.0911	42	48	48	TRUE	0.9241	coiled-coil domain containing 3 [Source:MGI Symbol;Acc:MGI:1921436]	2	5137776	5230878	1	Ccdc3	74186
ENSMUSG00000026678	0	0	0	10	5	3	0	0	0	10	5	3	2.88	0	6	30726	4941	3288	0.00100883667167495	0.00434786364321641	0.2363	0.5768	0.5436	0.5436	TRUE	0.3572	regulator of G-protein signaling 5 [Source:MGI Symbol;Acc:MGI:1098434]	1	169655501	169695813	1	Rgs5	19737
ENSMUSG00000026687	351	411	392	645	664	587	380	405	394	615	622	602	502.93	393	613	1561	642	7264	3.75694	600.48	0	0.0047	0.0035	0.0035	TRUE	0.0092	aldehyde dehydrogenase 9, subfamily A1 [Source:MGI Symbol;Acc:MGI:1861622]	1	167349991	167368532	1	Aldh9a1	56752
ENSMUSG00000026694	303	320	345	540	516	504	328	315	346	515	483	517	417.49	330	505	1531	615	6337	23498.9	284149	0	0.0054	0.0043	0.0043	TRUE	0.0223	EEF1A lysine and N-terminal methyltransferase [Source:MGI Symbol;Acc:MGI:1918699]	1	162532127	162548551	-1	Eef1aknmt	71449
ENSMUSG00000026721	291	332	378	597	617	503	315	327	380	570	578	516	447.47	341	555	1628	703	7	256.726	3771.25	0.0039	0.0051	0.0049	0.0049	TRUE	115	RAB GTPase activating protein 1-like [Source:MGI Symbol;Acc:MGI:1352507]	1	160219174	160793211	-1	Rabgap1l	29809
ENSMUSG00000026723	79	91	87	131	159	131	86	90	87	125	149	134	111.79	88	136	1555	637	3618	0.000296501284394521	0.00144859070312325	0	0.0162	0.0129	0.0129	TRUE	0.0716	tRNA aspartic acid methyltransferase 1 [Source:MGI Symbol;Acc:MGI:1274787]	2	13509014	13544668	-1	Trdmt1	13434
ENSMUSG00000026727	481	466	502	851	831	775	521	459	504	812	778	795	644.79	495	795	1609	686	8302	0.0102328	0.217009	0	4	0.0033	0.0033	TRUE	0.0467	Ras suppressor protein 1 [Source:MGI Symbol;Acc:MGI:103040]	2	13076821	13271415	-1	Rsu1	20163
ENSMUSG00000026748	133	156	178	386	416	311	144	154	179	368	389	319	258.86	159	359	2261	1177	9029	1.73511e-05	0.000435148	7	0.0078	0.0077	0.0077	TRUE	0.1277	plexin domain containing 2 [Source:MGI Symbol;Acc:MGI:1914698]	2	16356304	16755839	1	Plxdc2	67448
ENSMUSG00000026833	41	38	41	116	91	102	44	37	41	111	85	105	70.58	41	100	2446	1.29	5587	2.31319e+06	2.18264e+07	0	0.0249	0.0211	0.0211	TRUE	0.1729	olfactomedin 1 [Source:MGI Symbol;Acc:MGI:1860437]	2	28192992	28230736	1	Olfm1	56177
ENSMUSG00000026837	2426	2784	2762	13263	13172	11376	2626	2742	2773	12656	12331	11673	7466.66	2714	12220	4503	2171	44532	0	0	0.0009	0.0016	0.0015	0.0015	TRUE	0.0187	collagen, type V, alpha 1 [Source:MGI Symbol;Acc:MGI:88457]	2	27886425	28039514	1	Col5a1	12831
ENSMUSG00000026888	50	60	51	132	92	92	54	59	51	126	86	94	78.48	55	102	1864	898	4054	5.02637e+09	0.000284386343269076	0.0161	0.0225	0.0213	0.0213	TRUE	0.4158	growth factor receptor bound protein 14 [Source:MGI Symbol;Acc:MGI:1355324]	2	64912476	65024987	-1	Grb14	50915
ENSMUSG00000026896	2	2	0	25	31	20	2	2	0	24	29	21	12.92	1	25	17953	4166	4973	6.59842e+07	5.12024e+08	0	0.1298	0.1114	0.1114	TRUE	0.4873	interferon induced with helicase C domain 1 [Source:MGI Symbol;Acc:MGI:1918836]	2	62595798	62646255	-1	Ifih1	71586
ENSMUSG00000026946	7	4	9	37	45	32	8	4	9	35	42	33	21.8	7	37	5391	2431	5264	1.40597e+07	1.20507e+08	0	0.0775	0.0655	0.0655	TRUE	0.3833	N-myc (and STAT) interactor [Source:MGI Symbol;Acc:MGI:1928368]	2	51948487	51973494	-1	Nmi	64685
ENSMUSG00000026980	147	147	153	469	462	386	159	145	154	448	432	396	288.93	153	425	2793	1482	12335	5.87577e-21	2.9375e-19	0	0.0071	0.0059	0.0059	TRUE	0.0412	lymphocyte antigen 75 [Source:MGI Symbol;Acc:MGI:106662]	2	60292103	60383303	-1	Ly75	17076
ENSMUSG00000026994	0	1	0	10	9	13	0	1	0	10	8	13	5.38	0	10	28417	4829	3581	0.000341936118471474	0.00164786407536442	0	0.3097	0.2635	0.2635	TRUE	0.3915	polypeptide N-acetylgalactosaminyltransferase 3 [Source:MGI Symbol;Acc:MGI:894695]	2	66082766	66124994	-1	Galnt3	14425
ENSMUSG00000027102	42	45	38	131	142	125	45	44	38	125	133	128	85.69	42	129	3022	1595	7566	3.84578	65.8881	0	0.0208	0.0163	0.0163	TRUE	0.0659	homeobox D8 [Source:MGI Symbol;Acc:MGI:96209]	2	74704615	74707933	1	Hoxd8	15437
ENSMUSG00000027189	101	104	90	654	661	587	109	102	90	624	619	602	357.88	100	615	6117	2613	21382	1.9855e-87	5.50452e-85	0	6	0.0049	0.0049	TRUE	0.0792	tripartite motif-containing 44 [Source:MGI Symbol;Acc:MGI:1931835]	2	102300119	102407828	-1	Trim44	80985
ENSMUSG00000027204	1696	2180	2094	3945	3925	3076	1836	2147	2102	3764	3674	3156	2779.98	2028	3531	1741	0.8	11102	1.22288e-14	4.89408e-13	0.0072	2	0.0034	0.0034	TRUE	0.1047	fibrillin 1 [Source:MGI Symbol;Acc:MGI:95489]	2	125300594	125507993	-1	Fbn1	14118
ENSMUSG00000027208	24	17	25	302	287	276	26	17	25	288	269	283	151.31	23	280	12.44	3637	16534	2.07895e-47	2.38345e-45	0	0.0124	0.0104	0.0104	TRUE	0.3122	fibroblast growth factor 7 [Source:MGI Symbol;Acc:MGI:95521]	2	126034658	126091185	1	Fgf7	14178
ENSMUSG00000027230	202	218	207	640	612	572	219	215	208	611	573	587	401.95	214	590	2762	1466	14376	7.27913e-33	5.66287e-31	0	0.0055	0.0043	0.0043	TRUE	11	cAMP responsive element binding protein 3-like 1 [Source:MGI Symbol;Acc:MGI:1347062]	2	91982328	92024502	-1	Creb3l1	26427
ENSMUSG00000027248	2803	2987	2752	4702	4960	4439	3034	2942	2763	4487	4643	4555	3737.2	2913	4562	1566	647	12702	5.75062e-23	3.06593e-21	0.0008	0.0019	0.0016	0.0016	TRUE	0.0246	protein disulfide isomerase associated 3 [Source:MGI Symbol;Acc:MGI:95834]	2	121413775	121438687	1	Pdia3	14827
ENSMUSG00000027253	9	11	11	87	59	58	10	11	11	83	55	60	38.23	11	66	6248	2643	7219	5.21966	824.76	0	0.0448	0.0408	0.0408	TRUE	0.4659	low density lipoprotein receptor-related protein 4 [Source:MGI Symbol;Acc:MGI:2442252]	2	91457511	91513779	1	Lrp4	228357
ENSMUSG00000027313	263	317	307	538	508	477	285	312	308	513	476	489	397.24	302	493	1632	707	7114	112.649	1736.77	0	0.0056	0.0044	0.0044	TRUE	0.0268	ChaC, cation transport regulator 1 [Source:MGI Symbol;Acc:MGI:1916315]	2	119351229	119354381	1	Chac1	69065
ENSMUSG00000027346	129	116	135	218	278	233	140	114	136	208	260	239	182.79	130	236	1819	863	5822	5800.38	590021	0.0068	0.0105	0.0098	0.0098	TRUE	0.1195	glycerophosphocholine phosphodiesterase 1 [Source:MGI Symbol;Acc:MGI:104898]	2	132529082	132587729	-1	Gpcpd1	74182
ENSMUSG00000027371	1	3	2	13	32	22	1	3	2	12	30	23	11.83	2	22	10625	3409	4522	6.12596e+07	4.09328e+09	0	0.1416	0.1364	0.1364	TRUE	0.0915	fumarylacetoacetate hydrolase domain containing 2A [Source:MGI Symbol;Acc:MGI:1915376]	2	127436215	127444565	-1	Fahd2a	68126
ENSMUSG00000027412	4	5	5	83	73	85	4	5	5	79	68	87	41.5	5	78	16397	4035	8889	6.18999e-05	0.00150056	0	0.0414	0.0351	0.0351	TRUE	0.0946	lipin 3 [Source:MGI Symbol;Acc:MGI:1891342]	2	160880670	160906002	1	Lpin3	64899
ENSMUSG00000027422	976	1046	1059	1785	1826	1860	1056	1030	1063	1703	1709	1909	1411.82	1050	1774	1689	756	11425	3.14035e-16	1.33011e-14	0.0018	0.0026	0.0024	0.0024	TRUE	0.0529	ribosome binding protein 1 [Source:MGI Symbol;Acc:MGI:1932395]	2	143947395	144011263	-1	Rrbp1	81910
ENSMUSG00000027460	1	4	0	36	42	42	1	4	0	34	39	43	20.3	2	39	22878	4516	6.17	68107.3	775000	0	0.0831	0.0729	0.0729	TRUE	11233	angiopoietin 4 [Source:MGI Symbol;Acc:MGI:1336887]	2	151911210	151945337	1	Angpt4	11602
ENSMUSG00000027533	402	409	405	926	972	1083	435	403	407	884	910	1111	691.55	415	968	2334	1223	12836	1.03474e-23	5.80063e-22	0.0082	0.0038	0.0048	0.0048	TRUE	0.1975	fatty acid binding protein 5, epidermal [Source:MGI Symbol;Acc:MGI:101790]	3	10012548	10016607	1	Fabp5	16592
ENSMUSG00000027602	88	98	89	200	222	167	95	97	89	191	208	171	141.86	94	190	2.03	1021	6312	27588.7	329165	0	0.0131	0.0109	0.0109	TRUE	0.0782	microtubule-associated protein 1 light chain 3 alpha [Source:MGI Symbol;Acc:MGI:1915661]	2	155276297	155278073	1	Map1lc3a	66734
ENSMUSG00000027669	238	235	232	398	387	360	258	231	233	380	362	369	305.57	241	370	1541	624	5645	1.64983e+06	1.58817e+07	0	0.0068	0.0054	0.0054	TRUE	0.0408	guanine nucleotide binding protein (G protein), beta 4 [Source:MGI Symbol;Acc:MGI:104581]	3	32580332	32616585	-1	Gnb4	14696
ENSMUSG00000027692	41	38	56	140	171	135	44	37	56	134	160	139	95.04	46	144	3133	1648	7867	0.362258	0.0684475	0.0062	0.0189	0.0171	0.0171	TRUE	306	TRAF2 and NCK interacting kinase [Source:MGI Symbol;Acc:MGI:1916264]	3	28263214	28675858	1	Tnik	665113
ENSMUSG00000027737	886	1120	906	2841	3220	2352	959	1103	910	2711	3014	2413	1851.71	991	2713	2739	1454	17716	3.13685e-56	4.47016e-54	0.0102	0.0023	0.0042	0.0042	TRUE	0.0919	solute carrier family 7 (cationic amino acid transporter, y+ system), member 11 [Source:MGI Symbol;Acc:MGI:1347355]	3	49892526	50443614	-1	Slc7a11	26570
ENSMUSG00000027750	138	136	129	5822	5905	5343	149	134	130	5555	5528	5482	2829.76	138	5522	40206	5329	61659	0	0	0	2	0.0016	0.0016	TRUE	0.0546	periostin, osteoblast specific factor [Source:MGI Symbol;Acc:MGI:1926321]	3	54361109	54391037	1	Postn	50706
ENSMUSG00000027800	29	40	33	484	467	404	31	39	33	462	437	415	236.25	34	438	12612	3657	20.47	3.99e-79	9.50618e-77	0	0.0084	0.0072	0.0072	TRUE	0.1053	transmembrane 4 superfamily member 1 [Source:MGI Symbol;Acc:MGI:104678]	3	57285611	57301988	-1	Tm4sf1	17112
ENSMUSG00000027806	1235	1395	1454	2257	2349	1939	1337	1374	1460	2154	2199	1990	1752.09	1390	2114	1521	605	9661	4.40104e-08	1.27097e-07	0.0018	0.0024	0.0022	0.0022	TRUE	0.0318	TSC22 domain family, member 2 [Source:MGI Symbol;Acc:MGI:1919283]	3	58414715	58466783	1	Tsc22d2	72033
ENSMUSG00000027820	906	930	1065	3609	4012	2580	981	916	1069	3444	3756	2647	2135.43	989	3282	3321	1731	10994	4.06523e-14	1.60172e-12	0.0172	0.0022	0.0058	0.0172	TRUE	323	membrane metallo endopeptidase [Source:MGI Symbol;Acc:MGI:97004]	3	63241537	63386030	1	Mme	17380
ENSMUSG00000027832	0	3	4	66	80	67	0	3	4	63	75	69	35.6	2	69	28948	4855	8035	0.093923	1.85751	0	48	0.0414	0.0414	TRUE	0.6839	pentraxin related gene [Source:MGI Symbol;Acc:MGI:104641]	3	66219910	66225805	1	Ptx3	19288
ENSMUSG00000027840	0	0	0	4	10	4	0	0	0	4	9	4	2.88	0	6	30699	4.94	3295	0.000982833737978591	0.00424539627101914	0.1698	0.5774	0.5355	0.5355	TRUE	0.7278	wingless-type MMTV integration site family, member 2B [Source:MGI Symbol;Acc:MGI:1261834]	3	104945272	104961921	-1	Wnt2b	22414
ENSMUSG00000027848	60	55	45	212	230	196	65	54	45	202	215	201	130.5	55	206	3778	1918	10565	4.34047e-12	1.53558e-10	0	0.0141	12	12	TRUE	0.2096	olfactomedin-like 3 [Source:MGI Symbol;Acc:MGI:1914877]	3	103722222	103738001	-1	Olfml3	99543
ENSMUSG00000027858	0	7	5	25	22	16	0	7	5	24	21	16	12.13	4	20	5018	2327	3.71	0.000207043341303047	0.00104779185801157	0.0051	0.1382	0.1333	0.1333	TRUE	10481	tetraspanin 2 [Source:MGI Symbol;Acc:MGI:1917997]	3	102734529	102801513	1	Tspan2	70747
ENSMUSG00000027859	113	139	172	376	387	331	122	137	173	359	362	340	248.76	144	354	2453	1294	9698	3.06348e-08	8.98305e-07	0.0068	0.0081	0.0079	0.0079	TRUE	0.3173	nerve growth factor [Source:MGI Symbol;Acc:MGI:97321]	3	102469919	102521013	1	Ngf	18049
ENSMUSG00000027894	6	5	2	38	24	33	6	5	2	36	22	34	17.67	4	31	6942	2795	5091	3.55659e+07	2.86633e+08	0	0.0953	0.0864	0.0864	TRUE	0.4344	solute carrier family 6 (neurotransmitter transporter), member 17 [Source:MGI Symbol;Acc:MGI:2442535]	3	107467543	107518018	-1	Slc6a17	229706
ENSMUSG00000027896	4	4	11	22	35	11	4	4	11	21	33	11	14.06	6	22	3.37	1753	3068	0.00215618750252536	0.00851529319826643	0.2076	0.1194	0.1337	0.1337	TRUE	0.1827	solute carrier family 16 (monocarboxylic acid transporters), member 4 [Source:MGI Symbol;Acc:MGI:2385183]	3	107291230	107312115	1	Slc16a4	229699
ENSMUSG00000027952	51	62	70	89	102	114	55	61	70	85	95	117	80.65	62	99	1.59	669	3127	0.00176814330666802	0.00714567960245799	0.0098	22	0.0199	0.0199	TRUE	0.2374	phosphomevalonate kinase [Source:MGI Symbol;Acc:MGI:1915853]	3	89454541	89469013	1	Pmvk	68603
ENSMUSG00000027954	129	144	137	257	243	210	140	142	138	245	227	215	184.53	140	229	1643	717	5148	2.63026e+07	2.16908e+08	0	0.0104	0.0082	0.0082	TRUE	0.0404	ephrin A1 [Source:MGI Symbol;Acc:MGI:103236]	3	89271733	89281142	-1	Efna1	13636
ENSMUSG00000027985	111	122	110	234	213	238	120	120	110	223	199	244	169.6	117	222	1.9	926	6196	5789.81	66328.3	0	0.0112	0.0095	0.0095	TRUE	0.0906	lymphoid enhancer binding factor 1 [Source:MGI Symbol;Acc:MGI:96770]	3	131110471	131224356	1	Lef1	16842
ENSMUSG00000027996	0	0	0	11	2	3	0	0	0	10	2	3	2.57	0	5	27402	4776	3047	0.00230767912608946	0.00903865690074802	0.9516	0.6458	676	676	TRUE	16602	secreted frizzled-related protein 2 [Source:MGI Symbol;Acc:MGI:108078]	3	83766321	83774316	1	Sfrp2	20319
ENSMUSG00000028019	750	829	907	1313	1467	1153	812	816	911	1253	1373	1183	1058.01	846	1270	1501	586	7662	1.82719	32.2465	0.0041	3	0.0032	0.0032	TRUE	0.0614	platelet-derived growth factor, C polypeptide [Source:MGI Symbol;Acc:MGI:1859631]	3	81036416	81214040	1	Pdgfc	54635
ENSMUSG00000028047	115	102	105	241	243	206	124	100	105	230	227	211	166.53	110	223	2029	1021	6796	1076.07	14822	0	0.0114	0.0094	0.0094	TRUE	0.1248	thrombospondin 3 [Source:MGI Symbol;Acc:MGI:98739]	3	89215180	89226837	1	Thbs3	21827
ENSMUSG00000028076	10	18	9	29	39	26	11	18	9	28	37	27	21.41	13	31	2413	1271	3043	0.00234430043958705	0.0091585685633675	0	0.0789	69	69	TRUE	0.5557	CD1d1 antigen [Source:MGI Symbol;Acc:MGI:107674]	3	86995834	86999441	-1	Cd1d1	12479
ENSMUSG00000028128	85	97	88	154	190	182	92	96	88	147	178	187	131.24	92	171	1853	0.89	5268	1.38042e+06	1.18584e+07	0	14	0.0121	0.0121	TRUE	0.1577	coagulation factor III [Source:MGI Symbol;Acc:MGI:88381]	3	121723537	121735048	1	F3	14066
ENSMUSG00000028159	109	132	136	194	219	186	118	130	137	185	205	191	160.92	128	194	1.51	594	4008	6.11831e+08	0.000339490694761867	0	0.0117	0.0094	0.0094	TRUE	0.0476	dual adaptor for phosphotyrosine and 3-phosphoinositides 1 [Source:MGI Symbol;Acc:MGI:1347063]	3	137931007	137981545	-1	Dapp1	26377
ENSMUSG00000028167	19	18	24	54	34	49	21	18	24	52	32	50	32.67	21	45	2139	1097	3236	0.00121117912095104	0.00511580588262089	0	0.0522	0.0473	0.0473	TRUE	0.5084	3-hydroxybutyrate dehydrogenase, type 2 [Source:MGI Symbol;Acc:MGI:1917022]	3	135281221	135304426	1	Bdh2	69772
ENSMUSG00000028194	361	416	384	900	905	878	391	410	386	859	847	901	632.14	396	869	2197	1136	13649	2.05149e-28	1.35416e-26	0	4	0.0031	0.0031	TRUE	0.0121	dimethylarginine dimethylaminohydrolase 1 [Source:MGI Symbol;Acc:MGI:1916469]	3	145758675	145894277	1	Ddah1	69219
ENSMUSG00000028195	595	772	851	2561	2743	2606	644	760	854	2444	2568	2674	1657.37	753	2562	3399	1765	22282	5.47911e-96	1.67091e-93	0.0095	0.0024	0.0037	0.0037	TRUE	0.1858	cellular communication network factor 1 [Source:MGI Symbol;Acc:MGI:88613]	3	145646976	145649981	-1	Ccn1	16007
ENSMUSG00000028214	9	6	5	29	31	27	10	6	5	28	29	28	17.51	7	28	4114	2041	4207	2.58762e+09	0.000154366561297668	0	0.0962	0.0775	0.0775	TRUE	0.3161	GTP binding protein (gene overexpressed in skeletal muscle) [Source:MGI Symbol;Acc:MGI:99844]	4	11704457	11714752	1	Gem	14579
ENSMUSG00000028273	2155	2252	2481	4511	4685	4081	2332	2218	2491	4304	4386	4188	3319.82	2347	4293	1829	871	16006	1.15113e-44	1.18597e-41	0.0015	0.0019	0.0018	0.0018	TRUE	0.0351	PDZ and LIM domain 5 [Source:MGI Symbol;Acc:MGI:1927489]	3	142239590	142395696	-1	Pdlim5	56376
ENSMUSG00000028278	15	13	15	87	51	63	16	13	15	83	48	65	39.92	15	65	4439	2.15	6286	32511.7	384293	0	43	42	42	TRUE	0.0806	Ras-related GTP binding D [Source:MGI Symbol;Acc:MGI:1098604]	4	32983037	33022180	1	Rragd	52187
ENSMUSG00000028347	265	250	277	532	513	519	287	246	278	508	480	533	388.59	270	507	1875	907	8746	0.000221482	0.00521972	0.0012	0.0057	0.0049	0.0049	TRUE	0.0696	transmembrane protein with EGF-like and two follistatin-like domains 1 [Source:MGI Symbol;Acc:MGI:1926810]	4	48585174	48663131	1	Tmeff1	230157
ENSMUSG00000028364	83	72	92	672	667	656	90	71	92	641	624	673	365.31	84	646	7672	2.94	22778	7.51078e-101	2.54498e-98	0.0001	0.0059	0.0052	0.0052	TRUE	0.1909	tenascin C [Source:MGI Symbol;Acc:MGI:101922]	4	63959785	64047015	-1	Tnc	21923
ENSMUSG00000028369	15	22	23	47	44	44	16	22	23	45	41	45	32.03	20	44	2144	1.1	3338	0.000842533281758734	0.00370015768440587	0	0.0532	0.0421	0.0421	TRUE	0.1574	sushi, von Willebrand factor type A, EGF and pentraxin domain containing 1 [Source:MGI Symbol;Acc:MGI:1928849]	4	58042442	58206859	-1	Svep1	64817
ENSMUSG00000028464	6	7	11	42	51	45	6	7	11	40	48	46	26.4	8	45	5468	2451	5855	477003	4.91442e+06	0	0.0642	0.0528	0.0528	TRUE	293	tropomyosin 2, beta [Source:MGI Symbol;Acc:MGI:98810]	4	43514711	43523765	-1	Tpm2	22004
ENSMUSG00000028466	142	159	151	249	286	275	154	157	152	238	268	282	208.23	154	263	1704	769	5741	941824	9.33741e+06	0	0.0094	0.0078	0.0078	TRUE	0.0774	cAMP responsive element binding protein 3 [Source:MGI Symbol;Acc:MGI:99946]	4	43562332	43567060	1	Creb3	12913
ENSMUSG00000028469	96	110	87	189	179	125	104	108	87	180	168	128	129.29	100	159	1592	671	3792	0.000149488293500474	0.000779014866471368	0.0151	0.0142	0.0144	0.0144	TRUE	0.2914	natriuretic peptide receptor 2 [Source:MGI Symbol;Acc:MGI:97372]	4	43631935	43651244	1	Npr2	230103
ENSMUSG00000028567	119	134	129	283	281	244	129	132	130	270	263	250	195.62	130	261	2008	1006	7388	14.9357	24.5502	0	0.0099	0.0076	0.0076	TRUE	0.0143	thioredoxin domain containing 12 (endoplasmic reticulum) [Source:MGI Symbol;Acc:MGI:1913323]	4	108834601	108862127	1	Txndc12	66073
ENSMUSG00000028568	138	144	168	399	401	359	149	142	169	381	375	368	264.06	153	375	2445	1.29	10.52	6.96983e-12	2.41536e-10	0	0.0077	0.0062	0.0062	TRUE	0.0826	basic transcription factor 3-like 4 [Source:MGI Symbol;Acc:MGI:1915312]	4	108814295	108833614	-1	Btf3l4	70533
ENSMUSG00000028582	155	180	171	423	420	429	168	177	172	404	393	440	292.29	172	412	2392	1258	10756	5.57447e-13	2.06811e-11	0	0.0071	0.0057	0.0057	TRUE	0.0397	coiled-coil and C2 domain containing 1B [Source:MGI Symbol;Acc:MGI:2443076]	4	108619940	108634123	1	Cc2d1b	319965
ENSMUSG00000028630	499	519	524	887	894	827	540	511	526	846	837	849	684.86	526	844	1606	683	8759	0.000197166	0.00465384	0	0.0038	0.0028	0.0028	TRUE	7	dual-specificity tyrosine-(Y)-phosphorylation regulated kinase 2 [Source:MGI Symbol;Acc:MGI:1330301]	10	118855603	118870209	-1	Dyrk2	69181
ENSMUSG00000028641	138	138	124	270	254	215	149	136	124	258	238	221	187.63	136	239	1.75	808	5689	1.28153e+06	1.24781e+07	0	0.0102	0.0087	0.0087	TRUE	0.0666	prolyl 3-hydroxylase 1 [Source:MGI Symbol;Acc:MGI:1888921]	4	119232915	119248975	1	P3h1	56401
ENSMUSG00000028664	218	257	244	758	696	682	236	253	245	723	652	700	468.11	245	692	2824	1498	15343	3.92603e-39	3.67265e-37	0	5	0.0041	0.0041	TRUE	0.0307	Eph receptor B2 [Source:MGI Symbol;Acc:MGI:99611]	4	136647539	136835988	-1	Ephb2	13844
ENSMUSG00000028698	89	87	93	174	161	129	96	86	93	166	151	132	120.75	92	150	1634	708	4093	4.26715e+09	0.000245009257132723	0	0.0151	0.0128	0.0128	TRUE	105	phosphoinositide-3-kinase regulatory subunit 3 [Source:MGI Symbol;Acc:MGI:109277]	4	116221618	116303056	1	Pik3r3	18710
ENSMUSG00000028710	45	60	61	151	173	157	49	59	61	144	162	161	106.03	56	156	2757	1463	7.68	1.58922	28.3419	0	0.0171	14	14	TRUE	0.1123	ATP synthase mitochondrial F1 complex assembly factor 1 [Source:MGI Symbol;Acc:MGI:2180560]	4	115784812	115822655	1	Atpaf1	230649
ENSMUSG00000028780	122	149	132	326	386	258	132	147	133	311	361	265	224.74	137	312	2.28	1189	8.34	0.00739882	0.159346	0.0116	0.0088	0.0094	0.0094	TRUE	0.1081	sema domain, immunoglobulin domain (Ig), short basic domain, secreted, (semaphorin) 3C [Source:MGI Symbol;Acc:MGI:107557]	5	17574281	17730268	1	Sema3c	20348
ENSMUSG00000028789	41	44	36	113	100	86	44	43	36	108	94	88	68.92	41	97	2342	1228	5322	1.02765e+06	8.97457e+07	0	0.0255	0.0209	0.0209	TRUE	0.1023	antizyme inhibitor 2 [Source:MGI Symbol;Acc:MGI:2442093]	4	128930233	128962442	-1	Azin2	242669
ENSMUSG00000028793	343	397	388	993	983	832	371	391	390	948	920	854	645.54	384	907	2363	1.24	14.65	1.35191e-34	1.10828e-32	0	4	0.0033	0.0033	TRUE	0.0312	ring finger protein 19B [Source:MGI Symbol;Acc:MGI:1922484]	4	129058271	129085886	1	Rnf19b	75234
ENSMUSG00000028841	0	2	0	14	9	7	0	2	0	13	8	7	5.16	1	9	14274	3835	3115	0.00184087381520249	0.00740749062521429	0	0.3232	0.2879	0.2879	TRUE	0.9732	connector enhancer of kinase suppressor of Ras 1 [Source:MGI Symbol;Acc:MGI:2670958]	4	134228041	134238399	-1	Cnksr1	194231
ENSMUSG00000028919	235	247	272	418	427	387	254	243	273	399	400	397	327.73	257	399	1552	634	5.93	302586	3.19739e+06	0	0.0065	5	5	TRUE	0.0345	Rho guanine nucleotide exchange factor (GEF) 19 [Source:MGI Symbol;Acc:MGI:1925912]	4	141239499	141257564	1	Arhgef19	213649
ENSMUSG00000028931	35	43	41	72	76	68	38	42	41	69	71	70	55.17	40	70	1725	787	3201	0.00136944177500867	0.00570993934518245	0	0.0315	24	24	TRUE	0.0222	potassium voltage-gated channel, shaker-related subfamily, beta member 2 [Source:MGI Symbol;Acc:MGI:109239]	4	152390742	152477910	-1	Kcnab2	16498
ENSMUSG00000028949	72	77	88	139	162	138	78	76	88	133	152	142	111.33	81	142	1759	815	4576	4.73289e+08	3.21407e+08	0	0.0163	0.0131	0.0131	TRUE	65	SWI/SNF related, matrix associated, actin dependent regulator of chromatin, subfamily d, member 3 [Source:MGI Symbol;Acc:MGI:1914243]	5	24590818	24624411	-1	Smarcd3	66993
ENSMUSG00000029093	97	94	91	313	308	226	105	93	91	299	288	232	184.64	96	273	2841	1506	9761	1.65288e-09	4.91289e-07	0.0087	0.0104	0.0101	0.0101	TRUE	0.1907	sortilin-related VPS10 domain containing receptor 2 [Source:MGI Symbol;Acc:MGI:1932289]	5	36017180	36398139	-1	Sorcs2	81840
ENSMUSG00000029094	419	466	480	1007	1081	931	453	459	482	961	1012	955	720.42	465	976	2.1	1.07	13564	6.51868e-28	4.19396e-26	0	0.0037	0.0029	0.0029	TRUE	0.0125	actin filament associated protein 1 [Source:MGI Symbol;Acc:MGI:1917542]	5	35893319	36003923	1	Afap1	70292
ENSMUSG00000029096	26	23	28	58	75	48	28	23	28	55	70	49	42.29	26	58	2222	1152	3909	9.28632e+08	0.000500699482128527	0	0.0406	0.0348	0.0348	TRUE	0.2823	HtrA serine peptidase 3 [Source:MGI Symbol;Acc:MGI:1925808]	5	35652023	35679782	-1	Htra3	78558
ENSMUSG00000029103	101	139	87	233	224	235	109	137	87	222	210	241	167.79	111	224	2015	1011	6248	4156.18	48302.9	0.0173	0.0113	0.0121	0.0121	TRUE	0.4204	low density lipoprotein receptor-related protein associated protein 1 [Source:MGI Symbol;Acc:MGI:96829]	5	35091501	35105766	-1	Lrpap1	16976
ENSMUSG00000029126	0	0	0	13	14	13	0	0	0	12	13	13	6.47	0	13	68818	6105	4625	3.73994e+08	2.58156e+09	0	0.2576	0.2179	0.2179	TRUE	0.0711	neuron specific gene family member 1 [Source:MGI Symbol;Acc:MGI:109149]	5	38137192	38159907	-1	Nsg1	18196
ENSMUSG00000029135	1164	1233	1202	2750	2908	2642	1260	1214	1207	2624	2722	2711	1956.37	1227	2686	2189	1131	20124	4.55803e-77	1.00726e-73	0	0.0023	0.0017	0.0017	TRUE	0.0064	fos-like antigen 2 [Source:MGI Symbol;Acc:MGI:102858]	5	32135801	32157842	1	Fosl2	14284
ENSMUSG00000029141	229	258	243	407	384	419	248	254	244	388	359	430	320.61	249	392	1577	658	5883	402214	4.18347e+06	0	0.0066	0.0057	0.0057	TRUE	0.0785	solute carrier family 4 (anion exchanger), member 1, adaptor protein [Source:MGI Symbol;Acc:MGI:1196608]	5	31526995	31556932	1	Slc4a1ap	20534
ENSMUSG00000029161	54	41	37	118	141	113	58	40	37	113	132	116	82.75	45	120	2664	1414	6.4	15575.4	191065	0.0078	0.0215	0.0198	0.0198	TRUE	0.4801	cell growth regulator with EF hand domain 1 [Source:MGI Symbol;Acc:MGI:1915817]	5	30933143	30945591	-1	Cgref1	68567
ENSMUSG00000029163	536	617	556	2229	2245	1996	580	608	558	2127	2102	2048	1337.11	582	2092	3595	1846	27768	1.05136e-155	6.41243e-153	0	0.0026	0.0021	0.0021	TRUE	18	elastin microfibril interfacer 1 [Source:MGI Symbol;Acc:MGI:1926189]	5	30913402	30921277	1	Emilin1	100952
ENSMUSG00000029185	429	405	454	750	796	760	464	399	456	716	745	780	593.27	440	747	1.7	765	8676	4.10626e-05	0.000948671	0.0019	0.0042	0.0038	0.0038	TRUE	0.0775	family with sequence similarity 114, member A1 [Source:MGI Symbol;Acc:MGI:1915553]	5	64970071	65041886	1	Fam114a1	68303
ENSMUSG00000029207	1694	1808	1976	3022	3144	2815	1833	1781	1984	2884	2943	2888	2385.54	1866	2905	1557	639	11354	7.05216e-16	2.95416e-14	1	0.0021	0.0018	0.0018	TRUE	0.0372	amyloid beta (A4) precursor protein-binding, family B, member 2 [Source:MGI Symbol;Acc:MGI:108405]	5	66298703	66618784	-1	Apbb2	11787
ENSMUSG00000029217	107	79	93	175	190	130	116	78	93	167	178	133	127.54	96	159	1673	743	4075	4.60756e+09	0.000262541315664028	0.0211	0.0144	0.0155	0.0155	TRUE	0.3188	tec protein tyrosine kinase [Source:MGI Symbol;Acc:MGI:98662]	5	72755716	72868483	-1	Tec	21682
ENSMUSG00000029223	15	18	18	50	53	51	16	18	18	48	50	52	33.62	17	50	2872	1522	4618	3.87936e+08	2.66933e+09	0	0.0508	0.0391	0.0391	TRUE	0.0146	ubiquitin carboxy-terminal hydrolase L1 [Source:MGI Symbol;Acc:MGI:103149]	5	66676091	66687234	1	Uchl1	22223
ENSMUSG00000029337	1	3	2	35	34	40	1	3	2	33	32	41	18.72	2	35	17341	4116	5995	203830	2.19802e+06	0	0.09	0.0755	0.0755	TRUE	0.1538	fibroblast growth factor 5 [Source:MGI Symbol;Acc:MGI:95519]	5	98254184	98277030	1	Fgf5	14176
ENSMUSG00000029370	0	0	0	7	8	11	0	0	0	7	7	11	4.24	0	8	45	5492	3937	8.26235e+09	0.000448183387756427	0	0.3925	0.3452	0.3452	TRUE	0.2512	Ras association (RalGDS/AF-6) domain family member 6 [Source:MGI Symbol;Acc:MGI:1920496]	5	90603076	90640657	-1	Rassf6	73246
ENSMUSG00000029380	87	84	82	142	175	148	94	83	82	135	164	152	118.4	86	150	1743	801	4593	4.37298e+08	2.98608e+09	0	0.0154	0.0128	0.0128	TRUE	0.0805	chemokine (C-X-C motif) ligand 1 [Source:MGI Symbol;Acc:MGI:108068]	5	90891241	90893115	1	Cxcl1	14825
ENSMUSG00000029381	50	71	48	102	96	93	54	70	48	97	90	95	75.81	57	94	1638	712	3279	0.00104317330320321	0.0044782008168841	0	0.0233	0.02	0.02	TRUE	0.3184	shroom family member 3 [Source:MGI Symbol;Acc:MGI:1351655]	5	92683435	92965318	1	Shroom3	27428
ENSMUSG00000029392	77	106	104	167	190	193	83	104	104	159	178	198	137.9	97	178	1827	0.87	5205	1.94447e+07	1.62662e+08	0.0057	0.0134	0.0122	0.0122	TRUE	0.1481	Rab interacting lysosomal protein-like 1 [Source:MGI Symbol;Acc:MGI:1922945]	5	124493080	124531391	-1	Rilpl1	75695
ENSMUSG00000029401	67	72	62	131	115	123	73	71	62	125	108	126	94.09	69	120	1745	803	4152	3.30045e+09	0.000193782571410234	0	19	0.0154	0.0154	TRUE	0.0795	Rab interacting lysosomal protein-like 2 [Source:MGI Symbol;Acc:MGI:1933112]	5	124463265	124478366	-1	Rilpl2	80291
ENSMUSG00000029580	21237	22708	20570	44710	43411	40840	22985	22364	20652	42663	40639	41906	31868.05	22000	41736	1897	924	19632	8.16808e-72	1.70612e-69	0.0018	0.0015	0.0016	0.0016	TRUE	0.0352	actin, beta [Source:MGI Symbol;Acc:MGI:87904]	5	142903115	142906754	-1	Actb	11461
ENSMUSG00000029581	2264	2547	2302	4191	4229	4034	2450	2508	2311	3999	3959	4139	3227.87	2423	4032	1664	735	14158	1.66494e-31	1.25059e-29	0.0007	0.0019	0.0016	0.0016	TRUE	0.02	fascin actin-bundling protein 1 [Source:MGI Symbol;Acc:MGI:1352745]	5	142960343	142973185	1	Fscn1	14086
ENSMUSG00000029616	343	350	351	553	558	553	371	345	352	528	522	567	447.63	356	539	1514	598	6.35	21594.7	262162	0	0.0051	0.0041	0.0041	TRUE	0.0242	endoplasmic reticulum protein 29 [Source:MGI Symbol;Acc:MGI:1914647]	5	121428590	121452506	-1	Erp29	67397
ENSMUSG00000029636	27	35	42	85	143	110	29	34	42	81	134	113	72.28	35	109	3091	1628	6.47	9818.58	122016	0.0373	0.0244	0.0267	0.0267	TRUE	0.1507	WAS protein family, member 3 [Source:MGI Symbol;Acc:MGI:2658986]	5	146384985	146473615	1	Wasf3	245880
ENSMUSG00000029661	13366	15119	15108	46509	46246	40095	14466	14890	15168	44380	43293	41141	28889.63	14841	42938	2893	1533	35337	1.56019e-259	1.82999e-256	1	0.0015	0.0013	0.0013	TRUE	0.0164	collagen, type I, alpha 2 [Source:MGI Symbol;Acc:MGI:88468]	6	4504814	4541544	1	Col1a2	12843
ENSMUSG00000029671	0	0	0	6	7	7	0	0	0	6	7	7	3.24	0	7	34456	5107	3522	0.000427974106196932	0.00201225691374987	0	0.5129	0.44	0.44	TRUE	0.0711	wingless-type MMTV integration site family, member 16 [Source:MGI Symbol;Acc:MGI:2136018]	6	22288227	22298522	1	Wnt16	93735
ENSMUSG00000029673	0	0	0	6	6	3	0	0	0	6	6	3	2.4	0	5	25611	4679	3035	0.00240180015585806	0.00937359835590575	0	0.6917	0.6113	0.6113	TRUE	0.1881	autism susceptibility candidate 2 [Source:MGI Symbol;Acc:MGI:1919847]	5	131437333	132543344	-1	Auts2	319974
ENSMUSG00000029860	999	1152	1116	2086	2066	1985	1081	1135	1120	1990	1934	2037	1549.6	1112	1987	1786	837	13963	2.63166e-30	1.87512e-28	0	0.0025	0.0019	0.0019	TRUE	0.0069	zyxin [Source:MGI Symbol;Acc:MGI:103072]	6	42349630	42360213	1	Zyx	22793
ENSMUSG00000030116	99	87	95	450	415	323	107	86	95	429	388	331	239.59	96	383	3999	2	13697	1.05435e-28	7.1136e-27	0.0106	0.0083	0.0088	0.0088	TRUE	116	microfibrillar associated protein 5 [Source:MGI Symbol;Acc:MGI:1354387]	6	122505845	122529290	1	Mfap5	50530
ENSMUSG00000030246	3	0	1	19	5	16	3	0	1	18	5	16	7.25	1	13	9479	3245	3388	0.000703251731767142	0.00314094387990199	0.4194	0.2304	0.2522	0.2522	TRUE	1403	lactate dehydrogenase B [Source:MGI Symbol;Acc:MGI:96763]	6	142490249	142507957	-1	Ldhb	16832
ENSMUSG00000030403	505	538	490	817	853	766	547	530	492	780	799	786	655.41	523	788	1508	593	7342	21.0622	3.4202	0	0.0039	0.0031	0.0031	TRUE	0.0312	vasodilator-stimulated phosphoprotein [Source:MGI Symbol;Acc:MGI:109268]	7	19256929	19271817	-1	Vasp	22323
ENSMUSG00000030468	1	0	1	7	10	15	1	0	1	7	9	15	5.59	1	10	15282	3934	3246	0.00116930311557187	0.00495127295369061	0	0.2984	0.2639	0.2639	TRUE	0.2308	sialic acid binding Ig-like lectin G [Source:MGI Symbol;Acc:MGI:2443630]	7	43408204	43418358	1	Siglecg	243958
ENSMUSG00000030513	78	71	80	203	234	184	84	70	80	194	219	189	139.37	78	201	2569	1361	8142	0.0388744	0.788241	0	0.0133	0.0112	0.0112	TRUE	0.0815	proprotein convertase subtilisin/kexin type 6 [Source:MGI Symbol;Acc:MGI:102897]	7	65861734	66050386	1	Pcsk6	18553
ENSMUSG00000030533	151	165	152	268	245	249	163	163	153	256	229	255	203.19	160	247	1547	0.63	4731	2.23884e+08	1.60272e+09	0	0.0096	0.0076	0.0076	TRUE	0.0437	unc-45 myosin chaperone A [Source:MGI Symbol;Acc:MGI:2142246]	7	80325292	80347993	-1	Unc45a	101869
ENSMUSG00000030554	32	39	28	131	145	130	35	38	28	125	136	133	82.55	34	131	3896	1962	8737	0.00023852	0.00560394	0	0.0215	0.0175	0.0175	TRUE	0.1523	synemin, intermediate filament protein [Source:MGI Symbol;Acc:MGI:2661187]	7	67730160	67759742	-1	Synm	233335
ENSMUSG00000030562	101	106	128	338	314	320	109	104	129	323	294	328	214.51	114	315	2759	1464	10552	4.98505e-12	1.75547e-10	0	0.0091	0.0079	0.0079	TRUE	125	NADPH oxidase 4 [Source:MGI Symbol;Acc:MGI:1354184]	7	87246096	87398710	1	Nox4	50490
ENSMUSG00000030598	65	76	46	146	154	152	70	75	46	139	144	156	105.14	64	146	2297	1.2	6095	109498	1.21782e+06	0.0118	0.0172	0.0166	0.0166	TRUE	0.5201	F-box protein 17 [Source:MGI Symbol;Acc:MGI:1354707]	7	28716804	28738144	1	Fbxo17	50760
ENSMUSG00000030600	0	0	2	28	25	33	0	0	2	27	23	34	14.33	1	28	41066	5.36	4875	1.08858e+08	8.16463e+08	0	0.1172	103	103	TRUE	0.9736	leucine rich repeat and fibronectin type III domain containing 1 [Source:MGI Symbol;Acc:MGI:2136810]	7	28451980	28468242	1	Lrfn1	80749
ENSMUSG00000030616	17	16	14	133	103	115	18	16	14	127	96	118	64.92	16	114	7096	2827	9802	1.10209e-08	3.28859e-07	0	27	0.0238	0.0238	TRUE	0.1835	synaptotagmin-like 2 [Source:MGI Symbol;Acc:MGI:1933366]	7	90302252	90410719	1	Sytl2	83671
ENSMUSG00000030621	38	40	54	97	87	60	41	39	54	93	81	62	61.72	45	79	1.75	808	3245	0.00117397476612717	0.00496967441252277	0.0212	0.0283	0.0271	0.0271	TRUE	0.2715	malic enzyme 3, NADP(+)-dependent, mitochondrial [Source:MGI Symbol;Acc:MGI:1916679]	7	89632392	89854359	1	Me3	109264
ENSMUSG00000030638	44	33	50	76	71	80	48	33	50	73	66	82	58.57	44	74	1698	764	3059	0.00222063444903653	0.00873587050539449	0.0072	0.0297	0.0265	0.0265	TRUE	0.3886	SH3-domain GRB2-like 3 [Source:MGI Symbol;Acc:MGI:700011]	7	82173840	82307419	1	Sh3gl3	20408
ENSMUSG00000030657	3	4	5	64	78	60	3	4	5	61	73	62	34.64	4	65	15972	3998	8143	0.0385232	0.78216	0	0.0493	0.0411	0.0411	TRUE	0.0996	xylosyltransferase 1 [Source:MGI Symbol;Acc:MGI:2451073]	7	117380979	117673580	1	Xylt1	233781
ENSMUSG00000030659	106	122	129	327	329	380	115	120	130	312	308	390	229.05	122	337	2767	1468	10407	2.30047e-11	7.7404e-10	0.0088	0.0087	0.0087	0.0087	TRUE	0.2156	nucleobindin 2 [Source:MGI Symbol;Acc:MGI:1858179]	7	116504369	116540584	1	Nucb2	53322
ENSMUSG00000030660	909	927	973	1657	1812	1594	984	913	977	1581	1696	1636	1297.78	958	1638	1.71	774	11904	1.13464e-18	5.16448e-17	0.0007	0.0027	0.0022	0.0022	TRUE	0.0203	phosphatidylinositol-4-phosphate 3-kinase catalytic subunit type 2 alpha [Source:MGI Symbol;Acc:MGI:1203729]	7	116337265	116443449	-1	Pik3c2a	18704
ENSMUSG00000030739	1	1	0	16	13	11	1	1	0	15	12	11	6.8	1	13	18935	4243	3621	0.000293143553109153	0.00143402402881243	0	0.2454	0.2026	0.2026	TRUE	0.2561	myosin, heavy polypeptide 14 [Source:MGI Symbol;Acc:MGI:1919210]	7	44605803	44670843	-1	Myh14	71960
ENSMUSG00000030761	187	216	225	652	667	554	202	213	226	622	624	568	409.34	214	605	2831	1501	14493	1.33192e-33	1.05777e-31	0	0.0055	0.0045	0.0045	TRUE	0.0323	myosin VIIA [Source:MGI Symbol;Acc:MGI:104510]	7	98051060	98119524	-1	Myo7a	17921
ENSMUSG00000030768	325	342	399	655	685	557	352	337	401	625	641	572	487.83	363	613	1688	755	7804	0.597442	11.0556	0.0034	0.0048	0.0045	0.0045	TRUE	0.0948	dispatched RND transporter family member 1 [Source:MGI Symbol;Acc:MGI:1916147]	1	183086266	183221522	-1	Disp1	68897
ENSMUSG00000030774	335	385	401	601	662	595	363	379	403	573	620	611	491.35	382	601	1575	656	7167	76.414	1188.94	0	0.0048	0.0039	0.0039	TRUE	27	p21 (RAC1) activated kinase 1 [Source:MGI Symbol;Acc:MGI:1339975]	7	97788541	97912381	1	Pak1	18479
ENSMUSG00000030827	1	2	2	16	14	12	1	2	2	15	13	12	7.62	2	13	7984	2997	3561	0.000369591245397508	0.00176275486700695	0	219	174	174	TRUE	67	fibroblast growth factor 21 [Source:MGI Symbol;Acc:MGI:1861377]	7	45613886	45615490	-1	Fgf21	56636
ENSMUSG00000030847	409	409	433	704	699	663	443	403	435	672	654	680	547.77	427	669	1568	649	7502	6.27364	106.054	0	0.0044	0.0035	0.0035	TRUE	0.0282	BCL2-associated athanogene 3 [Source:MGI Symbol;Acc:MGI:1352493]	7	128523616	128546981	1	Bag3	29810
ENSMUSG00000030849	255	272	285	466	458	415	276	268	286	445	429	426	354.87	277	433	1566	647	6303	29252.9	34739	0	0.0061	0.0046	0.0046	TRUE	0.0103	fibroblast growth factor receptor 2 [Source:MGI Symbol;Acc:MGI:95523]	7	130162451	133123350	-1	Fgfr2	14183
ENSMUSG00000030890	591	585	536	1012	1097	1062	640	576	538	966	1027	1090	806.04	585	1028	1758	814	9856	6.45314e-09	1.95621e-07	0.0037	0.0035	0.0036	0.0036	TRUE	0.0778	integrin linked kinase [Source:MGI Symbol;Acc:MGI:1195267]	7	105736592	105742925	1	Ilk	16202
ENSMUSG00000030946	46	42	46	176	127	134	50	41	46	168	119	137	93.61	46	141	3094	1.63	7635	2.26564	39.6629	0	0.0191	0.0182	0.0182	TRUE	0.1736	phospholysine phosphohistidine inorganic pyrophosphate phosphatase [Source:MGI Symbol;Acc:MGI:1923679]	7	132610638	132706420	1	Lhpp	76429
ENSMUSG00000031070	38	28	47	79	92	63	41	28	47	75	86	65	57.01	39	75	1957	969	3726	0.000194788217392214	0.00099302264754145	0.0202	0.0305	29	29	TRUE	0.3928	MAS-related GPR, member F [Source:MGI Symbol;Acc:MGI:2384823]	7	145300828	145309557	1	Mrgprf	211577
ENSMUSG00000031129	258	324	339	586	716	456	279	319	340	559	670	468	439.34	313	566	1808	855	7058	169.109	2558.1	0.0193	0.0052	0.0081	0.0081	TRUE	0.1464	solute carrier family 9 (sodium/hydrogen exchanger), member 9 [Source:MGI Symbol;Acc:MGI:2679732]	9	94669909	95230445	1	Slc9a9	331004
ENSMUSG00000031189	2	3	1	35	31	34	2	3	1	33	29	35	17.24	2	32	15861	3987	5757	853919	8.52131e+06	0	0.0977	0.0806	0.0806	TRUE	0.1884	AF4/FMR2 family, member 2 [Source:MGI Symbol;Acc:MGI:1202294]	X	69360294	69868037	1	Aff2	14266
ENSMUSG00000031207	4375	4855	4312	8148	8256	7710	4735	4781	4329	7775	7729	7911	6210.1	4615	7805	1691	758	15.43	1.0329e-39	9.78243e-38	0.0013	0.0017	0.0016	0.0016	TRUE	0.0359	moesin [Source:MGI Symbol;Acc:MGI:97167]	X	96096042	96168552	1	Msn	17698
ENSMUSG00000031209	0	2	5	102	131	93	0	2	5	97	123	95	53.73	2	105	44183	5465	9292	1.51302e-06	4.03332e-05	0.0131	0.0323	0.0301	0.0301	TRUE	10316	hephaestin [Source:MGI Symbol;Acc:MGI:1332240]	X	96455359	96574485	1	Heph	15203
ENSMUSG00000031253	4	1	1	12	18	20	4	1	1	11	17	21	9.19	2	16	7891	2.98	3806	0.000141229175328424	0.000739005650448804	0.0308	0.1819	0.1637	0.1637	TRUE	564	sushi-repeat-containing protein, X-linked 2 [Source:MGI Symbol;Acc:MGI:1916042]	X	133908426	133932446	1	Srpx2	68792
ENSMUSG00000031255	0	0	0	24	14	16	0	0	0	23	13	16	8.74	0	17	92877	6537	5066	4.06143e+07	3.25085e+08	0	0.1913	0.1722	0.1722	TRUE	0.1565	synaptotagmin-like 4 [Source:MGI Symbol;Acc:MGI:1351606]	X	133936385	133981812	-1	Sytl4	27359
ENSMUSG00000031273	9	5	8	223	237	175	10	5	8	213	222	180	106.15	8	205	27314	4772	13802	2.47063e-29	1.69695e-27	0	17	0.0156	0.0156	TRUE	0.2765	collagen, type IV, alpha 6 [Source:MGI Symbol;Acc:MGI:2152695]	X	141165403	141474076	-1	Col4a6	94216
ENSMUSG00000031283	7	5	7	31	34	28	8	5	7	30	32	29	18.28	7	30	4636	2213	4586	4.51476e+08	3.07463e+09	0	0.0922	0.0728	0.0728	TRUE	0.1191	chordin-like 1 [Source:MGI Symbol;Acc:MGI:1933172]	X	143285674	143394262	-1	Chrdl1	83453
ENSMUSG00000031342	28	37	30	123	129	106	30	36	30	117	121	109	73.96	32	116	3578	1839	7905	0.267152	5.09193	0	0.0238	19	19	TRUE	0.0899	glycoprotein m6b [Source:MGI Symbol;Acc:MGI:107672]	X	166238911	166388988	1	Gpm6b	14758
ENSMUSG00000031349	399	400	406	691	739	628	432	394	408	659	692	644	538.16	411	665	1619	695	7922	0.233819	0.447337	0	0.0045	0.0036	0.0036	TRUE	0.0219	NAD(P) dependent steroid dehydrogenase-like [Source:MGI Symbol;Acc:MGI:1099438]	X	72918557	72958514	1	Nsdhl	18194
ENSMUSG00000031371	207	204	207	736	798	738	224	201	208	702	747	757	473.23	211	735	3.49	1803	18183	7.00458e-61	1.12427e-57	0	0.0049	4	4	TRUE	0.0312	HAUS augmin-like complex, subunit 7 [Source:MGI Symbol;Acc:MGI:1920988]	X	73437315	73459044	-1	Haus7	73738
ENSMUSG00000031383	11	12	12	28	34	29	12	12	12	27	32	30	20.68	12	30	2469	1304	3166	0.00154532774685728	0.00635296777678077	0	0.0816	0.0628	0.0628	TRUE	0.0447	dual specificity phosphatase 9 [Source:MGI Symbol;Acc:MGI:2387107]	X	73639419	73643514	1	Dusp9	75590
ENSMUSG00000031387	0	0	1	20	20	18	0	0	1	19	19	18	9.55	0	19	51195	5678	4454	8.41707e+08	5.47541e+09	0	0.1752	0.1451	0.1451	TRUE	0.4083	renin binding protein [Source:MGI Symbol;Acc:MGI:105940]	X	73922121	73930850	-1	Renbp	19703
ENSMUSG00000031442	17	10	19	44	42	41	18	10	19	42	39	42	28.45	16	41	2616	1387	3824	0.000131218656464853	0.000689225654073745	0	0.0597	0.0505	0.0505	TRUE	0.5313	mcf.2 transforming sequence-like [Source:MGI Symbol;Acc:MGI:103263]	8	12873806	13020905	1	Mcf2l	17207
ENSMUSG00000031502	41	36	33	294	373	334	44	35	33	281	349	343	180.9	37	324	8637	3111	16516	2.83067e-47	3.22105e-46	0	0.0106	0.0104	0.0104	TRUE	0.1674	collagen, type IV, alpha 1 [Source:MGI Symbol;Acc:MGI:88454]	8	11198423	11312826	-1	Col4a1	12826
ENSMUSG00000031503	7	12	23	271	312	262	8	12	23	259	292	269	143.67	14	273	19123	4257	16178	7.17682e-45	7.76115e-43	0.0017	13	0.0124	0.0124	TRUE	13318	collagen, type IV, alpha 2 [Source:MGI Symbol;Acc:MGI:88455]	8	11312805	11449287	1	Col4a2	12827
ENSMUSG00000031520	33	41	66	84	109	107	36	40	66	80	102	110	72.39	47	97	2045	1032	4204	2.61858e+09	0.000156152215270059	0.0467	0.0243	0.0277	0.0277	TRUE	0.9644	vascular endothelial growth factor C [Source:MGI Symbol;Acc:MGI:109124]	8	54077606	54187096	1	Vegfc	22341
ENSMUSG00000031523	278	325	282	572	590	548	301	320	283	546	552	562	427.42	301	553	1836	877	9.06	1.30561e-05	0.000332353	0	0.0053	0.0042	0.0042	TRUE	0.0343	deleted in liver cancer 1 [Source:MGI Symbol;Acc:MGI:1354949]	8	36567751	36953143	-1	Dlc1	50768
ENSMUSG00000031538	24	33	35	88	98	77	26	33	35	84	92	79	58.06	31	85	2716	1441	5682	1.33442e+06	1.29682e+07	0	0.03	0.0243	0.0243	TRUE	0.1357	plasminogen activator, tissue [Source:MGI Symbol;Acc:MGI:97610]	8	22757727	22782844	1	Plat	18791
ENSMUSG00000031626	69	101	97	478	473	413	75	99	97	456	443	424	265.7	90	441	4857	2.28	16708	1.14059e-48	1.39134e-46	0	0.0077	0.0067	0.0067	TRUE	212	sorbin and SH3 domain containing 2 [Source:MGI Symbol;Acc:MGI:1924574]	8	45507788	45827906	1	Sorbs2	234214
ENSMUSG00000031659	197	217	215	806	842	715	213	214	216	769	788	734	488.96	214	764	3565	1834	18921	7.60018e-66	1.33204e-63	0	0.0048	0.0037	0.0037	TRUE	0.0138	adenylate cyclase 7 [Source:MGI Symbol;Acc:MGI:102891]	8	88272403	88329962	1	Adcy7	11513
ENSMUSG00000031709	72	79	93	212	183	201	78	78	93	202	171	206	138.16	83	193	2325	1217	7231	47.7788	758.098	0	0.0134	0.0117	0.0117	TRUE	0.1125	TBC1 domain family, member 9 [Source:MGI Symbol;Acc:MGI:1918560]	8	83165352	83272934	1	Tbc1d9	71310
ENSMUSG00000031740	1468	1620	1625	3754	3852	3114	1589	1595	1631	3582	3606	3195	2533.19	1605	3461	2157	1109	18597	3.38219e-63	5.79457e-61	0.0022	0.0021	0.0021	0.0021	TRUE	0.0545	matrix metallopeptidase 2 [Source:MGI Symbol;Acc:MGI:97009]	8	92827291	92853420	1	Mmp2	17390
ENSMUSG00000031778	306	392	346	611	594	524	331	386	347	583	556	538	456.9	355	559	1574	654	6815	940.782	12970.2	0.0011	5	0.0043	0.0043	TRUE	0.0682	chemokine (C-X3-C motif) ligand 1 [Source:MGI Symbol;Acc:MGI:1097153]	8	94772009	94782427	1	Cx3cl1	20312
ENSMUSG00000031785	0	2	4	14	14	13	0	2	4	13	13	13	7.63	2	13	6532	2707	3331	0.00086490821308579	0.00378425263504509	0	0.2188	0.1878	0.1878	TRUE	0.6883	adhesion G protein-coupled receptor G1 [Source:MGI Symbol;Acc:MGI:1340051]	8	94974751	95014217	1	Adgrg1	14766
ENSMUSG00000031788	167	181	195	342	325	326	181	178	196	326	304	335	253.31	185	322	1739	798	6579	4721.03	60543.5	0	8	0.0063	0.0063	TRUE	0.0288	kinesin family member C3 [Source:MGI Symbol;Acc:MGI:109202]	8	95099828	95202812	-1	Kifc3	16582
ENSMUSG00000031799	1721	1813	1613	4037	4186	4149	1863	1786	1619	3852	3919	4257	2882.62	1756	4009	2284	1191	19239	1.74926e-68	3.25278e-67	0.0034	2	0.0024	0.0024	TRUE	0.0559	tropomyosin 4 [Source:MGI Symbol;Acc:MGI:2449202]	8	72130174	72153142	1	Tpm4	326618
ENSMUSG00000031827	58	54	55	207	188	180	63	53	55	198	176	185	121.56	57	186	3267	1708	9415	4.73355e-08	1.2935e-05	0	0.0151	0.0121	0.0121	TRUE	0.0619	coactosin-like 1 (Dictyostelium) [Source:MGI Symbol;Acc:MGI:1919292]	8	119809222	119840544	-1	Cotl1	72042
ENSMUSG00000031843	84	88	80	154	135	149	91	87	80	147	126	153	114.02	86	142	1652	724	4.1	4.1366e+09	0.000238288146598454	0	16	0.0131	0.0131	TRUE	0.0993	M phase phosphoprotein 6 [Source:MGI Symbol;Acc:MGI:1915783]	8	117791645	117801943	-1	Mphosph6	68533
ENSMUSG00000031880	71	61	60	114	112	116	77	60	60	109	105	119	88.3	66	111	1.69	757	3776	0.000159327413697045	0.000825773080915208	0	0.0202	0.0168	0.0168	TRUE	0.1858	Ras-related associated with diabetes [Source:MGI Symbol;Acc:MGI:1930943]	8	104628070	104631327	-1	Rrad	56437
ENSMUSG00000031906	29	17	31	130	139	117	31	17	31	124	130	120	75.58	26	125	4745	2246	9042	1.53438e-05	0.000386076	0	0.0234	0.0211	0.0211	TRUE	0.6712	sphingomyelin phosphodiesterase 3, neutral [Source:MGI Symbol;Acc:MGI:1927578]	8	106252548	106337988	-1	Smpd3	58994
ENSMUSG00000031963	53	70	72	216	243	211	57	69	72	206	227	217	141.45	66	217	3267	1708	10.07	7.48083e-10	2.35677e-08	0	0.0131	0.0108	0.0108	TRUE	114	BMP-binding endothelial regulator [Source:MGI Symbol;Acc:MGI:1920480]	9	23223076	23485200	1	Bmper	73230
ENSMUSG00000031986	175	166	173	336	329	305	189	163	174	321	308	313	244.69	175	314	1.79	0.84	6.82	911.185	12573.5	0	0.0082	0.0065	0.0065	TRUE	0.0496	SprT-like N-terminal domain [Source:MGI Symbol;Acc:MGI:2685351]	8	124897886	124906161	1	Sprtn	244666
ENSMUSG00000032042	844	988	826	1474	1414	1452	913	973	829	1407	1324	1490	1155.98	905	1407	1553	635	8528	0.00149099	0.0337309	4	0.0028	0.0031	0.0031	TRUE	65	signal recognition particle receptor ('docking protein') [Source:MGI Symbol;Acc:MGI:1914648]	9	35200175	35247973	1	Srpr	67398
ENSMUSG00000032085	1	4	1	269	290	295	1	4	1	257	271	303	139.48	2	277	135474	7082	11704	1.21484e-17	5.43222e-16	0	0.0133	12	12	TRUE	0.6658	transgelin [Source:MGI Symbol;Acc:MGI:106012]	9	45929619	45936058	-1	Tagln	21345
ENSMUSG00000032135	4	6	5	67	100	70	4	6	5	64	94	72	40.77	5	77	14984	3905	8699	0.000333971	0.00777463	0	0.0421	0.0388	0.0388	TRUE	0.2972	melanoma cell adhesion molecule [Source:MGI Symbol;Acc:MGI:1933966]	9	44134469	44142727	1	Mcam	84004
ENSMUSG00000032182	42	43	34	82	73	79	45	42	34	78	68	81	58.26	40	76	1868	901	3672	0.000240974079191729	0.00119686409104739	0	0.0299	0.0244	0.0244	TRUE	0.1493	Yip1 domain family, member 2 [Source:MGI Symbol;Acc:MGI:1922016]	9	21588682	21592828	-1	Yipf2	74766
ENSMUSG00000032185	609	688	631	1245	1295	1124	659	678	634	1188	1212	1153	920.64	657	1184	1804	851	11944	6.97168e-19	3.21161e-17	0	0.0032	0.0025	0.0025	TRUE	0.0115	coactivator-associated arginine methyltransferase 1 [Source:MGI Symbol;Acc:MGI:1913208]	9	21546894	21592623	1	Carm1	59035
ENSMUSG00000032193	1130	1273	1232	2451	2458	2109	1223	1254	1237	2339	2301	2164	1752.91	1238	2268	1832	874	14802	1.4323e-35	1.2201e-33	0	0.0024	0.0019	0.0019	TRUE	0.0192	low density lipoprotein receptor [Source:MGI Symbol;Acc:MGI:96765]	9	21723483	21749919	1	Ldlr	16835
ENSMUSG00000032262	26	41	28	94	83	81	28	40	28	90	78	83	57.86	32	84	2585	1.37	5361	8.28557e+06	7.34098e+07	0	0.0301	0.0254	0.0254	TRUE	0.3475	elongation of very long chain fatty acids (FEN1/Elo2, SUR4/Elo3, yeast)-like 4 [Source:MGI Symbol;Acc:MGI:1933331]	9	83778692	83806277	-1	Elovl4	83603
ENSMUSG00000032265	96	88	99	196	211	164	104	87	99	187	198	168	140.47	97	184	1911	934	5754	869782	8.65694e+06	0	0.0132	0.0111	0.0111	TRUE	81	terminal nucleotidyltransferase 5A [Source:MGI Symbol;Acc:MGI:2670964]	9	85320439	85327348	-1	Tent5a	212943
ENSMUSG00000032285	34	32	47	70	88	60	37	32	47	67	82	62	54.37	39	70	1827	0.87	3338	0.000844687200205749	0.00370641451186684	0.0119	0.0319	0.0287	0.0287	TRUE	0.2942	DnaJ heat shock protein family (Hsp40) member A4 [Source:MGI Symbol;Acc:MGI:1927638]	9	54698873	54716315	1	Dnaja4	58233
ENSMUSG00000032332	1612	1970	2006	6139	6104	5211	1745	1940	2014	5858	5714	5347	3769.65	1900	5640	2968	1569	26.33	8.5964e-140	4.36926e-136	0.0032	0.0018	0.0022	0.0022	TRUE	0.0607	collagen, type XII, alpha 1 [Source:MGI Symbol;Acc:MGI:88448]	9	79598991	79718831	-1	Col12a1	12816
ENSMUSG00000032359	0	1	1	9	11	9	0	1	1	9	10	9	5.02	1	9	13816	3788	3105	0.00190414445707501	0.00762057603188444	0	332	0.2679	0.2679	TRUE	0.2085	cathepsin H [Source:MGI Symbol;Acc:MGI:107285]	9	90054152	90076089	1	Ctsh	13036
ENSMUSG00000032363	43	46	57	118	117	117	47	45	57	113	110	120	81.87	50	114	2293	1197	5683	1.32364e+06	1.288e+07	0	0.0217	0.0174	0.0174	TRUE	145	a disintegrin-like and metallopeptidase (reprolysin type) with thrombospondin type 1 motif, 7 [Source:MGI Symbol;Acc:MGI:1347346]	9	90163069	90208071	1	Adamts7	108153
ENSMUSG00000032366	7499	8219	7735	14428	14694	14776	8116	8094	7766	13767	13756	15162	11110.19	7992	14228	1.78	832	16946	2.07686e-50	2.68373e-48	0.0018	0.0016	0.0016	0.0016	TRUE	0.0402	tropomyosin 1, alpha [Source:MGI Symbol;Acc:MGI:98809]	9	67022590	67049406	-1	Tpm1	22003
ENSMUSG00000032373	10	10	11	158	165	119	11	10	11	151	154	122	76.51	11	142	13499	3755	11.86	1.91076e-19	8.6712e-17	0	0.0231	0.0204	0.0204	TRUE	0.1595	carbonic anhydrase 12 [Source:MGI Symbol;Acc:MGI:1923709]	9	66713686	66766845	1	Car12	76459
ENSMUSG00000032374	617	740	675	1381	1458	1107	668	729	678	1318	1365	1136	982.14	692	1273	1841	881	10946	6.95674e-14	2.71295e-12	0.0051	0.0031	0.0035	0.0035	TRUE	0.1053	procollagen lysine, 2-oxoglutarate 5-dioxygenase 2 [Source:MGI Symbol;Acc:MGI:1347007]	9	92542223	92608428	1	Plod2	26432
ENSMUSG00000032380	4	1	4	67	91	58	4	1	4	64	85	60	36.33	3	70	22671	4503	8198	0.0245116	0.505071	0	0.0471	44	44	TRUE	0.5128	death-associated protein kinase 2 [Source:MGI Symbol;Acc:MGI:1341297]	9	66158223	66272242	1	Dapk2	13143
ENSMUSG00000032387	194	164	171	293	298	265	210	162	172	280	279	272	228.94	181	277	1532	616	4701	2.58962e+08	1.83402e+09	0.0027	0.0087	0.0078	0.0078	TRUE	204	RNA binding protein with multiple splicing 2 [Source:MGI Symbol;Acc:MGI:1919223]	9	65629648	65660528	1	Rbpms2	71973
ENSMUSG00000032419	290	319	350	714	721	686	314	314	351	681	675	704	506.6	326	687	2102	1072	11703	1.2337e-17	5.50044e-16	0	0.0047	0.0038	0.0038	TRUE	0.0511	T-box18 [Source:MGI Symbol;Acc:MGI:1923615]	9	87702800	87731260	-1	Tbx18	76365
ENSMUSG00000032420	99	117	111	278	317	287	107	115	111	265	297	294	198.39	111	285	2564	1358	9701	2.98072e-08	8.77414e-07	0	0.0098	0.0078	0.0078	TRUE	0.0438	5' nucleotidase, ecto [Source:MGI Symbol;Acc:MGI:99782]	9	88327197	88372092	1	Nt5e	23959
ENSMUSG00000032431	454	533	451	826	809	711	491	525	453	788	757	730	624.03	490	758	1549	631	7392	14.4111	237.557	0.0014	0.0041	0.0036	0.0036	TRUE	0.0515	cartilage associated protein [Source:MGI Symbol;Acc:MGI:1891221]	9	114375134	114390675	-1	Crtap	56693
ENSMUSG00000032440	557	650	647	1705	1765	1356	603	640	650	1627	1652	1391	1093.86	631	1557	2468	1303	16548	1.65578e-47	1.91268e-45	0.0047	0.0029	0.0033	0.0033	TRUE	0.1032	transforming growth factor, beta receptor II [Source:MGI Symbol;Acc:MGI:98729]	9	116084293	116175360	-1	Tgfbr2	21813
ENSMUSG00000032487	403	479	432	905	946	901	436	472	434	864	886	925	669.22	447	892	1992	994	12158	5.19309e-21	2.51378e-18	0	0.0039	0.0031	0.0031	TRUE	0.0272	prostaglandin-endoperoxide synthase 2 [Source:MGI Symbol;Acc:MGI:97798]	1	150100031	150108227	1	Ptgs2	19225
ENSMUSG00000032502	0	0	0	7	4	13	0	0	0	7	4	13	3.96	0	8	41907	5389	3766	0.000166082909058163	0.000856999051546147	0.3589	0.4203	0.4144	0.4144	TRUE	0.1753	src homology three (SH3) and cysteine rich domain [Source:MGI Symbol;Acc:MGI:1201400]	9	111561437	111690348	-1	Stac	20840
ENSMUSG00000032531	1963	2201	2120	3879	4137	3754	2125	2168	2128	3701	3873	3852	2974.47	2140	3809	1779	831	16.61	5.926e-49	6.95074e-46	0	2	0.0014	0.0014	TRUE	0.0074	angiomotin-like 2 [Source:MGI Symbol;Acc:MGI:1929286]	9	102716672	102733418	1	Amotl2	56332
ENSMUSG00000032558	47	60	62	97	102	91	51	59	62	93	95	93	75.6	57	94	1632	707	3339	0.00084132311094826	0.00369590746059898	0	0.0234	0.0182	0.0182	TRUE	0.0799	nephronophthisis 3 (adolescent) [Source:MGI Symbol;Acc:MGI:1921275]	9	104002544	104043818	1	Nphp3	74025
ENSMUSG00000032575	519	570	520	1017	998	933	562	561	522	970	934	957	751.2	548	954	1.74	799	10424	1.91665e-11	6.50892e-10	0	0.0036	0.0028	0.0028	TRUE	0.0208	mesencephalic astrocyte-derived neurotrophic factor [Source:MGI Symbol;Acc:MGI:1922090]	9	106838312	106891979	-1	Manf	74840
ENSMUSG00000032625	68	70	88	149	173	114	74	69	88	142	162	117	108.67	77	140	1826	869	4556	5.21352e+08	3.50975e+09	0.0135	0.0167	0.0161	0.0161	TRUE	0.1558	thrombospondin, type I, domain containing 7A [Source:MGI Symbol;Acc:MGI:2685683]	6	12311610	12749410	-1	Thsd7a	330267
ENSMUSG00000032640	480	466	533	949	925	897	520	459	535	906	866	920	700.91	505	897	1779	831	10049	9.25034e-10	2.90225e-08	0.0016	0.0038	0.0034	0.0034	TRUE	0.0743	chondroitin sulfate synthase 1 [Source:MGI Symbol;Acc:MGI:2681120]	7	66109515	66173798	1	Chsy1	269941
ENSMUSG00000032679	12	9	11	62	56	55	13	9	11	59	52	56	33.49	11	56	5128	2358	6453	10952.5	135555	0	51	0.0408	0.0408	TRUE	0.1077	CD59a antigen [Source:MGI Symbol;Acc:MGI:109177]	2	104095801	104115354	1	Cd59a	12509
ENSMUSG00000032763	169	178	156	293	304	238	183	175	157	280	285	244	220.54	172	270	1573	653	4959	7.07771e+07	5.45606e+07	0	0.0089	0.0077	0.0077	TRUE	0.0738	ilvB (bacterial acetolactate synthase)-like [Source:MGI Symbol;Acc:MGI:1351911]	10	78574346	78584502	1	Ilvbl	216136
ENSMUSG00000032766	60	65	74	141	124	139	65	64	74	135	116	143	99.42	68	131	1932	0.95	4971	6.64942e+07	5.15457e+08	0	0.0181	0.0151	0.0151	TRUE	0.1052	guanine nucleotide binding protein (G protein), gamma 11 [Source:MGI Symbol;Acc:MGI:1913316]	6	4003904	4008445	1	Gng11	66066
ENSMUSG00000032839	46	50	68	82	106	105	50	49	68	78	99	108	75.42	56	95	1702	767	3403	0.000667364489987039	0.00299205343820123	17	0.0234	0.0223	0.0223	TRUE	0.3275	transient receptor potential cation channel, subfamily C, member 1 [Source:MGI Symbol;Acc:MGI:109528]	9	95705082	95750375	-1	Trpc1	22063
ENSMUSG00000032997	257	338	314	497	551	392	278	333	315	474	516	402	386.43	309	464	1503	588	5212	1.87011e+07	1.57024e+08	0.0096	0.0057	0.0065	0.0065	TRUE	0.1556	chondroitin polymerizing factor [Source:MGI Symbol;Acc:MGI:106576]	1	75474569	75479307	-1	Chpf	74241
ENSMUSG00000033105	467	529	468	821	879	724	505	521	470	783	823	743	640.91	499	783	1571	651	7772	0.7716	14.0902	0.0011	4	0.0034	0.0034	TRUE	0.0304	lanosterol synthase [Source:MGI Symbol;Acc:MGI:1336155]	10	76531588	76557138	1	Lss	16987
ENSMUSG00000033149	2346	2550	2689	4068	4220	3848	2539	2511	2700	3882	3950	3948	3255.14	2583	3927	1.52	604	11988	4.08672e-19	1.90564e-18	0.0003	0.0019	0.0015	0.0015	TRUE	0.0189	pleckstrin homology like domain, family B, member 2 [Source:MGI Symbol;Acc:MGI:2444981]	16	45746243	45953598	-1	Phldb2	208177
ENSMUSG00000033152	12	11	7	98	99	73	13	11	7	94	93	75	48.66	10	87	8512	3.09	8923	4.54526e-05	0.000111246	0	0.0355	0.0309	0.0309	TRUE	0.2741	podocalyxin-like 2 [Source:MGI Symbol;Acc:MGI:2442488]	6	88842558	88875044	-1	Podxl2	319655
ENSMUSG00000033192	17	31	43	76	90	90	18	31	43	73	84	92	56.87	31	83	2689	1427	5174	2.29492e+07	1.90386e+08	0.0475	0.0306	0.0324	0.0324	TRUE	0.5649	lysophosphatidylcholine acyltransferase 2 [Source:MGI Symbol;Acc:MGI:3606214]	8	92855339	92919279	1	Lpcat2	270084
ENSMUSG00000033207	13	21	23	81	92	49	14	21	23	77	86	50	45.26	19	71	3687	1883	5935	294614	3.11531e+06	0.0454	0.0381	0.0393	0.0393	TRUE	0.4553	MAM domain containing 2 [Source:MGI Symbol;Acc:MGI:1918988]	19	23302609	23448442	-1	Mamdc2	71738
ENSMUSG00000033209	254	354	361	713	763	656	275	349	362	680	714	673	508.95	329	689	2094	1066	10605	2.83964e-12	1.01114e-10	0.0074	0.0047	5	5	TRUE	0.2258	tetratricopeptide repeat domain 28 [Source:MGI Symbol;Acc:MGI:2140873]	5	110879803	111289780	1	Ttc28	209683
ENSMUSG00000033256	62	86	100	125	160	133	67	85	100	119	150	136	109.62	84	135	1605	682	3603	0.000313980066533573	0.00152664797656375	0.0142	0.0165	0.0162	0.0162	TRUE	0.28	Src homology 2 domain containing F [Source:MGI Symbol;Acc:MGI:3613669]	2	122348892	122369162	-1	Shf	435684
ENSMUSG00000033306	2398	2732	3071	4996	5380	4675	2595	2691	3083	4767	5036	4797	3828.32	2790	4867	1744	803	13062	5.44622e-25	3.1456e-23	0.0043	0.0018	0.0024	0.0024	TRUE	0.1029	LIM domain containing preferred translocation partner in lipoma [Source:MGI Symbol;Acc:MGI:2441849]	16	24393507	24992578	1	Lpp	210126
ENSMUSG00000033350	104	116	124	275	247	228	113	114	124	262	231	234	179.81	117	242	2071	1.05	7274	34.8937	558.299	0	0.0106	0.0087	0.0087	TRUE	0.0577	carbohydrate sulfotransferase 2 [Source:MGI Symbol;Acc:MGI:1891160]	9	95399292	95406722	-1	Chst2	54371
ENSMUSG00000033355	24	8	21	82	80	77	26	8	21	78	75	79	47.85	18	77	4261	2091	6637	3210.57	42166	0.0606	0.0361	0.0371	0.0371	TRUE	13344	receptor transporter protein 4 [Source:MGI Symbol;Acc:MGI:1915025]	16	23520291	23614222	1	Rtp4	67775
ENSMUSG00000033420	198	205	194	554	570	425	214	202	195	529	534	436	351.55	204	500	2456	1296	11247	2.39065e-15	9.74668e-14	0.0059	0.0061	0.0061	0.0061	TRUE	0.1413	anthrax toxin receptor 1 [Source:MGI Symbol;Acc:MGI:1916788]	6	87133853	87335821	-1	Antxr1	69538
ENSMUSG00000033460	55	58	46	99	100	83	60	57	46	94	94	85	72.68	54	91	1681	749	3434	0.000595580030078967	0.00270844148483271	0	0.0242	0.0195	0.0195	TRUE	0.1434	armadillo repeat containing, X-linked 1 [Source:MGI Symbol;Acc:MGI:1925498]	X	134717963	134721917	1	Armcx1	78248
ENSMUSG00000033542	7	10	9	223	246	181	8	10	9	213	230	186	109.21	9	210	23694	4566	14155	1.73234e-31	1.29484e-29	0	0.0166	15	15	TRUE	0.0998	Rho guanine nucleotide exchange factor (GEF) 5 [Source:MGI Symbol;Acc:MGI:1858952]	6	43265582	43289320	1	Arhgef5	54324
ENSMUSG00000033576	2	6	6	58	36	52	2	6	6	55	34	53	26.08	5	47	9973	3318	6637	3208.86	42166	0	65	0.0624	0.0624	TRUE	0.5345	apolipoprotein L 6 [Source:MGI Symbol;Acc:MGI:1919189]	15	77044729	77057106	1	Apol6	71939
ENSMUSG00000033585	9	13	9	213	197	170	10	13	9	203	184	174	98.95	11	187	17757	4.15	13658	1.79648e-28	1.19099e-26	0	0.0182	0.0155	0.0155	TRUE	136	necdin [Source:MGI Symbol;Acc:MGI:97290]	7	62346569	62350262	1	Ndn	17984
ENSMUSG00000033676	3	1	1	63	56	47	3	1	1	60	52	48	27.67	2	53	31418	4974	7028	20.9446	3127.94	0	0.0614	0.0524	0.0524	TRUE	0.4086	gamma-aminobutyric acid (GABA) A receptor, subunit beta 3 [Source:MGI Symbol;Acc:MGI:95621]	7	57419692	57828802	1	Gabrb3	14402
ENSMUSG00000033684	382	421	400	822	695	671	413	415	402	784	651	689	558.86	410	708	1727	788	8494	0.00199503	0.0446699	0.0039	0.0044	0.0043	0.0043	TRUE	0.1069	quiescin Q6 sulfhydryl oxidase 1 [Source:MGI Symbol;Acc:MGI:1330818]	1	155776029	155812889	-1	Qsox1	104009
ENSMUSG00000033685	178	171	139	552	539	469	193	168	140	527	505	481	335.53	167	504	3028	1598	13365	9.65977e-27	5.96325e-25	0.0057	0.0064	0.0063	0.0063	TRUE	0.2181	uncoupling protein 2 (mitochondrial, proton carrier) [Source:MGI Symbol;Acc:MGI:109354]	7	100493337	100502020	1	Ucp2	22228
ENSMUSG00000033763	460	457	508	733	788	763	498	450	510	699	738	783	613	486	740	1523	607	7005	247.49	3644.63	2	0.0041	0.0037	0.0037	TRUE	0.0496	MTSS I-BAR domain containing 2 [Source:MGI Symbol;Acc:MGI:3039591]	8	110721476	110741400	1	Mtss2	244654
ENSMUSG00000033788	640	704	730	1457	1468	1331	693	693	733	1390	1374	1366	1041.53	706	1377	1949	963	14195	9.83019e-32	7.42033e-30	0	3	0.0022	0.0022	TRUE	0.0129	dysferlin [Source:MGI Symbol;Acc:MGI:1349385]	6	84008590	84211060	1	Dysf	26903
ENSMUSG00000033965	0	2	2	13	14	7	0	2	2	12	13	7	6.11	1	11	8069	3012	3154	0.00160908809888925	0.00657256237124651	0	0.2729	0.2353	0.2353	TRUE	0.41	solute carrier family 16 (monocarboxylic acid transporters), member 2 [Source:MGI Symbol;Acc:MGI:1203732]	X	103697414	103821983	-1	Slc16a2	20502
ENSMUSG00000034024	4292	4701	4246	7350	7391	7156	4645	4630	4263	7013	6919	7343	5802.2	4513	7092	1572	652	13043	6.99887e-25	4.02713e-23	0.0014	0.0017	0.0016	0.0016	TRUE	0.0286	chaperonin containing Tcp1, subunit 2 (beta) [Source:MGI Symbol;Acc:MGI:107186]	10	117051001	117063814	-1	Cct2	12461
ENSMUSG00000034040	1	2	0	27	40	33	1	2	0	26	37	34	16.69	1	32	31671	4985	5448	5.09716e+06	4.60981e+07	0	0.1008	0.0882	0.0882	TRUE	379	polypeptide N-acetylgalactosaminyltransferase 17 [Source:MGI Symbol;Acc:MGI:2137594]	5	130872082	131308497	-1	Galnt17	212996
ENSMUSG00000034064	435	475	490	783	802	667	471	468	492	747	751	684	602.15	477	727	1526	0.61	7241	44.3833	706.426	0	0.0042	0.0034	0.0034	TRUE	0.0312	protein O-glucosyltransferase 1 [Source:MGI Symbol;Acc:MGI:2444232]	16	38525137	38550258	-1	Poglut1	224143
ENSMUSG00000034118	213	210	183	338	346	304	231	207	184	323	324	312	263.24	207	320	1545	628	5172	2.3195e+06	1.92321e+08	0.0005	0.0077	0.0066	0.0066	TRUE	0.1055	protein-tyrosine sulfotransferase 1 [Source:MGI Symbol;Acc:MGI:1298231]	5	130073326	130135729	1	Tpst1	22021
ENSMUSG00000034161	169	195	169	358	380	392	183	192	170	342	356	402	274.03	182	367	2017	1012	8308	0.00974501	0.207241	0	0.0075	0.0066	0.0066	TRUE	0.0819	scleraxis [Source:MGI Symbol;Acc:MGI:102934]	15	76457452	76459458	1	Scx	20289
ENSMUSG00000034173	52	55	54	99	83	86	56	54	54	94	78	88	70.85	55	87	1581	661	3021	0.00251686035104157	0.00978258644728062	0	0.0248	0.0196	0.0196	TRUE	0.0829	zinc finger, BED type containing 5 [Source:MGI Symbol;Acc:MGI:1919220]	5	129895723	129903623	1	Zbed5	71970
ENSMUSG00000034194	63	53	55	112	115	125	68	52	55	107	108	128	86.4	58	114	1955	967	4685	2.79369e+08	1.96305e+09	0	0.0206	0.0177	0.0177	TRUE	0.1703	R3H domain and coiled-coil containing 1 [Source:MGI Symbol;Acc:MGI:1919093]	14	69697307	69707584	-1	R3hcc1	71843
ENSMUSG00000034330	88	102	125	245	235	192	95	100	125	234	220	197	162	107	217	2025	1018	6484	8948.56	111659	0.0059	0.0116	0.0108	0.0108	TRUE	0.2257	phospholipase C, gamma 2 [Source:MGI Symbol;Acc:MGI:97616]	8	117498291	117635142	1	Plcg2	234779
ENSMUSG00000034334	23	20	22	39	55	45	25	20	22	37	51	46	33.59	22	45	2027	1019	3149	0.00163994919828702	0.006686081651198	0	0.0508	0.0417	0.0417	TRUE	0.1842	family with sequence similarity 151, member B [Source:MGI Symbol;Acc:MGI:1921192]	13	92449625	92484015	-1	Fam151b	73942
ENSMUSG00000034422	73	99	95	210	205	176	79	98	95	200	192	181	140.8	91	191	2104	1073	6606	3939.17	51031.9	0	0.0132	0.0108	0.0108	TRUE	115	poly (ADP-ribose) polymerase family, member 14 [Source:MGI Symbol;Acc:MGI:1919489]	16	35832874	35871544	-1	Parp14	547253
ENSMUSG00000034462	614	655	729	1057	1088	1018	665	645	732	1009	1019	1045	852.2	681	1024	1504	589	7842	0.444848	8.34323	0.0006	0.0034	0.0028	0.0028	TRUE	0.0521	polycystin 2, transient receptor potential cation channel [Source:MGI Symbol;Acc:MGI:1099818]	5	104459450	104505819	1	Pkd2	18764
ENSMUSG00000034532	2	3	2	13	19	10	2	3	2	12	18	10	7.93	2	13	5674	2504	3266	0.0010893264116415	0.00465006974375969	0	0.2106	173	173	TRUE	0.3503	F-box protein 16 [Source:MGI Symbol;Acc:MGI:1354706]	14	65266618	65323973	1	Fbxo16	50759
ENSMUSG00000034551	11	19	21	92	73	68	12	19	21	88	68	70	46.27	17	75	4348	2.12	6849	74.2514	10349	0	0.0373	0.0331	0.0331	TRUE	0.3331	highly divergent homeobox [Source:MGI Symbol;Acc:MGI:2685226]	X	111569931	111697079	-1	Hdx	245596
ENSMUSG00000034557	178	217	207	442	500	372	193	214	208	422	468	382	314.29	205	424	2.07	1.05	8959	3.2843e-05	0.00081034	0.0045	0.0067	0.0063	0.0063	TRUE	0.0969	zinc finger, FYVE domain containing 9 [Source:MGI Symbol;Acc:MGI:2652838]	4	108637466	108780798	-1	Zfyve9	230597
ENSMUSG00000034612	77	69	98	150	155	111	83	68	98	143	145	114	108.64	83	134	1613	0.69	3622	0.000292220950108051	0.00142996952735801	0.0149	0.0167	0.0164	0.0164	TRUE	0.2505	carbohydrate sulfotransferase 11 [Source:MGI Symbol;Acc:MGI:1927166]	10	82985498	83195900	1	Chst11	58250
ENSMUSG00000034663	243	233	259	446	431	426	263	229	260	426	403	437	336.45	251	422	1683	751	6948	371.221	5370.38	0	0.0063	0.0052	0.0052	TRUE	63	BMP2 inducible kinase [Source:MGI Symbol;Acc:MGI:2155456]	5	96997689	97091867	1	Bmp2k	140780
ENSMUSG00000034674	209	246	227	408	360	364	226	242	228	389	337	373	299.37	232	366	1578	658	5788	713011	7.19047e+06	0	0.0069	0.0058	0.0058	TRUE	0.0584	thymine DNA glycosylase [Source:MGI Symbol;Acc:MGI:108247]	10	82629828	82650799	1	Tdg	21665
ENSMUSG00000034675	252	280	278	488	498	440	273	276	279	466	466	451	368.49	276	461	1672	741	7.36	18.3596	299.089	0	0.0059	0.0044	0.0044	TRUE	0.0038	drebrin 1 [Source:MGI Symbol;Acc:MGI:1931838]	13	55473429	55488111	-1	Dbn1	56320
ENSMUSG00000034686	63	78	55	170	116	148	68	77	55	162	109	152	103.82	67	141	2109	1076	5.25	1.52089e+07	1.29773e+08	0.0273	0.0174	0.0192	0.0192	TRUE	0.4282	proline rich 7 (synaptic) [Source:MGI Symbol;Acc:MGI:3487246]	13	55464267	55473154	1	Prr7	432763
ENSMUSG00000034731	129	168	167	278	296	305	140	165	168	265	277	313	221.34	158	285	1805	852	6.36	20132.9	24519.7	0.0036	0.0089	8	8	TRUE	101	diacylglycerol kinase, eta [Source:MGI Symbol;Acc:MGI:2444188]	14	78558750	78732776	-1	Dgkh	380921
ENSMUSG00000034765	68	89	66	125	114	118	74	88	66	119	107	121	95.76	76	116	1523	607	3154	0.00161073680840557	0.00657753477626357	0	0.0187	0.0158	0.0158	TRUE	0.1758	dual specificity phosphatase 5 [Source:MGI Symbol;Acc:MGI:2685183]	19	53529109	53542431	1	Dusp5	240672
ENSMUSG00000034854	67	58	66	132	138	97	73	57	66	126	129	100	91.76	65	118	1816	861	4.27	1.95089e+09	0.000118597914508664	0	0.0195	0.0173	0.0173	TRUE	0.1888	major facilitator superfamily domain containing 12 [Source:MGI Symbol;Acc:MGI:3604804]	10	81357491	81366225	1	Mfsd12	73822
ENSMUSG00000034910	15	23	25	82	74	75	16	23	25	78	69	77	48.08	21	75	3493	1805	6262	38127.8	446180	0	0.0359	0.0295	0.0295	TRUE	0.2258	pygopus 1 [Source:MGI Symbol;Acc:MGI:1919385]	9	72925645	72952181	1	Pygo1	72135
ENSMUSG00000034932	194	214	219	395	402	396	210	211	220	377	376	406	300.03	214	386	1809	855	7637	2.22018	38.9119	0	0.0069	0.0054	0.0054	TRUE	0.0227	mitochondrial ribosomal protein L54 [Source:MGI Symbol;Acc:MGI:1913297]	10	81264713	81266934	-1	Mrpl54	66047
ENSMUSG00000034949	32	37	34	64	73	67	35	36	34	61	68	69	50.56	35	66	1882	913	3526	0.000422013384467724	0.00198606792789008	0	0.0342	0.0263	0.0263	TRUE	0.0394	zinc finger RNA binding protein 2 [Source:MGI Symbol;Acc:MGI:2143792]	10	81233155	81252123	1	Zfr2	103406
ENSMUSG00000034974	234	278	247	417	388	418	253	274	248	398	363	429	327.51	258	397	1534	617	5559	2.71462e+06	2.5441e+07	0.0024	0.0065	0.0057	0.0057	TRUE	0.0633	death-associated protein kinase 3 [Source:MGI Symbol;Acc:MGI:1203520]	10	81183005	81193197	1	Dapk3	13144
ENSMUSG00000035042	0	0	0	8	5	7	0	0	0	8	5	7	3.25	0	7	34505	5109	3515	0.000439244456584952	0.00205196062316402	0	512	0.4473	0.4473	TRUE	0.1614	chemokine (C-C motif) ligand 5 [Source:MGI Symbol;Acc:MGI:98262]	11	83525778	83530518	-1	Ccl5	20304
ENSMUSG00000035246	139	168	173	325	385	306	150	165	174	310	360	314	245.68	163	328	2.01	1007	7887	0.310205	5.89776	0	0.0082	0.0071	0.0071	TRUE	0.0854	phosphate cytidylyltransferase 1, choline, beta isoform [Source:MGI Symbol;Acc:MGI:2147987]	X	93654863	93749951	1	Pcyt1b	236899
ENSMUSG00000035376	255	311	295	567	598	486	276	306	296	541	560	499	413	293	533	1.82	864	8642	0.000550492	0.0126224	0	0.0054	0.0046	0.0046	TRUE	0.0368	3-hydroxyacyl-CoA dehydratase 2 [Source:MGI Symbol;Acc:MGI:1918007]	16	35022428	35109177	1	Hacd2	70757
ENSMUSG00000035390	34	40	66	86	91	84	37	39	66	82	85	86	65.98	47	84	1775	828	3377	0.000731813636404474	0.00325706197545109	0.0286	0.0266	0.0268	0.0268	TRUE	962	BR serine/threonine kinase 1 [Source:MGI Symbol;Acc:MGI:2685946]	7	4690604	4715997	1	Brsk1	381979
ENSMUSG00000035441	517	634	663	1007	1050	909	560	624	666	961	983	933	787.69	617	959	1554	636	7966	0.163753	3.16866	0.0021	0.0035	0.0033	0.0033	TRUE	75	myosin ID [Source:MGI Symbol;Acc:MGI:107728]	11	80482126	80780025	-1	Myo1d	338367
ENSMUSG00000035473	15	25	16	44	39	41	16	25	16	42	37	42	29.58	19	40	2111	1078	3115	0.00184118503866488	0.00740749062521429	0	0.0575	0.0473	0.0473	TRUE	0.3674	galactose mutarotase [Source:MGI Symbol;Acc:MGI:2442420]	17	80127471	80185101	1	Galm	319625
ENSMUSG00000035513	7	17	10	44	49	40	8	17	10	42	46	41	27.21	12	43	3727	1898	4878	1.07359e+08	8.06009e+08	0	0.0624	0.0535	0.0535	TRUE	0.6391	netrin G2 [Source:MGI Symbol;Acc:MGI:2159341]	2	29194541	29253005	-1	Ntng2	171171
ENSMUSG00000035694	3	11	9	25	41	40	3	11	9	24	38	41	21.07	8	34	4416	2143	4569	4.89938e+08	3.31584e+08	0.0677	0.0802	0.0787	0.0787	TRUE	0.6636	calcyphosphine 2 [Source:MGI Symbol;Acc:MGI:2441980]	10	112163621	112216555	1	Caps2	353025
ENSMUSG00000035783	1979	2009	1782	18123	17398	17186	2142	1979	1789	17293	16287	17635	9520.7	1970	17072	8.67	3116	52944	0	0	0.0044	0.0016	0.0022	0.0022	TRUE	0.0779	actin, alpha 2, smooth muscle, aorta [Source:MGI Symbol;Acc:MGI:87909]	19	34241090	34255590	-1	Acta2	11475
ENSMUSG00000035934	118	136	156	330	326	265	128	134	157	315	305	272	218.38	140	297	2132	1092	8041	0.0089429	0.177093	0.0029	9	8	8	TRUE	0.1211	Pbx/knotted 1 homeobox 2 [Source:MGI Symbol;Acc:MGI:2445415]	9	36890982	37147407	-1	Pknox2	208076
ENSMUSG00000036036	71	68	93	170	194	167	77	67	93	162	182	171	125.39	79	172	2173	1119	6382	17424.3	212719	0.0016	0.0146	0.0129	0.0129	TRUE	0.2379	zinc finger protein 57 [Source:MGI Symbol;Acc:MGI:99204]	17	37001163	37010635	1	Zfp57	22715
ENSMUSG00000036052	64	51	70	94	119	110	69	50	70	90	111	113	83.96	63	105	1656	728	3442	0.000577222553751317	0.00263129942001575	0.0105	0.0212	0.0195	0.0195	TRUE	0.2924	DnaJ heat shock protein family (Hsp40) member B5 [Source:MGI Symbol;Acc:MGI:1930018]	4	42949814	42959425	1	Dnajb5	56323
ENSMUSG00000036103	558	538	622	969	1047	767	604	530	624	925	980	787	741.67	586	897	1533	616	6668	2596.26	3451.42	0.0088	0.0036	0.0047	0.0047	TRUE	0.1361	collectin sub-family member 12 [Source:MGI Symbol;Acc:MGI:2152907]	18	9707595	9882644	1	Colec12	140792
ENSMUSG00000036192	38	50	67	81	97	106	41	49	67	77	91	109	72.42	52	92	1.75	807	3431	0.000602184435417729	0.00273684300186275	0.0282	0.0243	0.0249	0.0249	TRUE	0.3843	RAR-related orphan receptor beta [Source:MGI Symbol;Acc:MGI:1343464]	19	18930605	19111196	-1	Rorb	225998
ENSMUSG00000036206	294	249	241	413	426	412	318	245	242	394	399	423	336.84	268	405	1512	596	5112	3.19048e+06	2.5932e+07	9	0.0063	0.0067	0.0067	TRUE	0.2873	SH3-domain binding protein 4 [Source:MGI Symbol;Acc:MGI:2138297]	1	89070415	89155068	1	Sh3bp4	98402
ENSMUSG00000036256	627	662	715	1342	1396	1220	679	652	718	1281	1307	1252	981.28	683	1280	1875	907	12827	1.16172e-23	6.46491e-22	0	0.0031	0.0025	0.0025	TRUE	0.0242	insulin-like growth factor binding protein 7 [Source:MGI Symbol;Acc:MGI:1352480]	5	77349240	77408041	-1	Igfbp7	29817
ENSMUSG00000036292	2	3	3	15	29	19	2	3	3	14	27	19	11.51	3	20	7472	2901	4236	2.27455e+09	0.000136921918349984	0	0.1455	0.1264	0.1264	TRUE	0.1153	GRAM domain containing 1C [Source:MGI Symbol;Acc:MGI:2443024]	16	43980350	44063345	-1	Gramd1c	207798
ENSMUSG00000036298	24	28	36	116	102	69	26	28	36	111	95	71	61.11	30	92	3088	1627	6136	84825.6	958800	0.0271	0.0286	0.0283	0.0283	TRUE	0.1652	solute carrier family 2 (facilitated glucose transporter), member 13 [Source:MGI Symbol;Acc:MGI:2146030]	15	91267696	91573261	-1	Slc2a13	239606
ENSMUSG00000036334	33	40	36	321	305	280	36	39	36	306	286	287	165.06	37	293	7895	2981	16126	1.68074e-44	1.80478e-42	0	0.0115	0.0092	0.0092	TRUE	0.0224	immunoglobulin superfamily, member 10 [Source:MGI Symbol;Acc:MGI:1923481]	3	59316735	59344394	-1	Igsf10	242050
ENSMUSG00000036368	49	56	63	107	87	93	53	55	63	102	81	95	75.07	57	93	1625	701	3245	0.00117435227566403	0.00496973105126551	0	0.0235	0.0194	0.0194	TRUE	0.1177	regulator of microtubule dynamics 2 [Source:MGI Symbol;Acc:MGI:2147043]	17	79611863	79693192	1	Rmdn2	381110
ENSMUSG00000036381	4	1	5	113	103	68	4	1	5	108	96	70	47.39	3	91	26816	4745	9196	3.73062e-06	9.7405e-05	0	0.0364	0.0367	0.0367	TRUE	0.5259	purinergic receptor P2Y, G-protein coupled, 14 [Source:MGI Symbol;Acc:MGI:2155705]	3	59113855	59153618	-1	P2ry14	140795
ENSMUSG00000036533	194	217	202	413	444	421	210	214	203	394	416	432	311.37	209	414	1981	987	8882	6.54081e-05	0.00157807	0	0.0067	0.0053	0.0053	TRUE	0.0203	CDC42 effector protein (Rho GTPase binding) 3 [Source:MGI Symbol;Acc:MGI:2384718]	17	79333727	79355091	-1	Cdc42ep3	260409
ENSMUSG00000036545	160	232	201	829	771	651	173	228	202	791	722	668	464.04	201	727	3608	1851	16798	2.53265e-49	3.13966e-47	0.0083	5	0.0055	0.0055	TRUE	0.1554	a disintegrin-like and metallopeptidase (reprolysin type) with thrombospondin type 1 motif, 2 [Source:MGI Symbol;Acc:MGI:1347356]	11	50602084	50807573	1	Adamts2	216725
ENSMUSG00000036565	201	206	219	628	603	536	218	203	220	599	564	550	392.34	214	571	2678	1421	13693	1.11776e-29	7.47526e-27	0	0.0056	0.0045	0.0045	TRUE	0.0216	tweety family member 3 [Source:MGI Symbol;Acc:MGI:1925589]	5	140620578	140649031	-1	Ttyh3	78339
ENSMUSG00000036599	77	84	86	164	147	129	83	83	86	156	138	132	113.15	84	142	1.69	757	4303	1.68769e+09	0.000104017149914115	0	0.0161	0.0128	0.0128	TRUE	0.0817	carbohydrate sulfotransferase 12 [Source:MGI Symbol;Acc:MGI:1929064]	5	140505550	140525724	1	Chst12	59031
ENSMUSG00000036764	13	13	23	41	49	31	14	13	23	39	46	32	27.79	17	39	2339	1226	3325	0.000883108175855457	0.00385503391509992	17	0.0611	0.0548	0.0548	TRUE	0.3918	DnaJ heat shock protein family (Hsp40) member C12 [Source:MGI Symbol;Acc:MGI:1353428]	10	63382443	63410576	1	Dnajc12	30045
ENSMUSG00000036782	129	122	103	190	212	172	140	120	103	181	198	176	153.24	121	185	1535	618	3933	8.39962e+09	0.0004546588646223	0.0038	0.0122	11	11	TRUE	0.1757	kelch-like 13 [Source:MGI Symbol;Acc:MGI:1914705]	X	23219271	23365082	-1	Klhl13	67455
ENSMUSG00000036854	96	103	105	291	279	257	104	101	105	278	261	264	185.55	103	268	2583	1369	9588	8.97092e-08	2.54727e-06	0	0.0103	0.0079	0.0079	TRUE	0.0125	heat shock protein, alpha-crystallin-related, B6 [Source:MGI Symbol;Acc:MGI:2685325]	7	30552178	30555443	1	Hspb6	243912
ENSMUSG00000036863	64	62	66	133	119	118	69	61	66	127	111	121	92.66	65	120	1829	871	4498	6.8733e+08	4.54287e+09	0	0.0193	0.0152	0.0152	TRUE	0.0393	synapse defective 1, Rho GTPase, homolog 2 (C. elegans) [Source:MGI Symbol;Acc:MGI:3036264]	3	145987870	146021720	1	Syde2	214804
ENSMUSG00000036957	33	30	22	77	80	71	36	30	22	73	75	73	51.43	29	74	2541	1345	5	5.74706e+07	4.50546e+08	0	0.0337	28	28	TRUE	0.2933	leucine rich repeat and fibronectin type III domain containing 3 [Source:MGI Symbol;Acc:MGI:2442512]	7	30355489	30362772	-1	Lrfn3	233067
ENSMUSG00000036968	79	66	58	139	133	140	86	65	58	133	125	144	101.59	70	134	1924	944	4869	1.11904e+08	8.38484e+08	0.0057	0.0177	0.0161	0.0161	TRUE	0.3453	canopy FGF signaling regulator 4 [Source:MGI Symbol;Acc:MGI:1913705]	5	138187485	138193918	1	Cnpy4	66455
ENSMUSG00000037035	85	108	115	376	420	382	92	106	115	359	393	392	242.96	104	381	3638	1863	13.78	3.34092e-29	2.27421e-27	0	0.0082	7	7	TRUE	0.1041	inhibin beta-B [Source:MGI Symbol;Acc:MGI:96571]	1	119415465	119422248	-1	Inhbb	16324
ENSMUSG00000037138	19	15	23	79	85	84	21	15	23	75	80	86	49.93	20	80	4133	2047	7039	194.154	2916.71	0	0.0346	0.0286	0.0286	TRUE	0.2503	AF4/FMR2 family, member 3 [Source:MGI Symbol;Acc:MGI:106927]	1	38177326	38664955	-1	Aff3	16764
ENSMUSG00000037211	35	54	55	198	197	160	38	53	55	189	184	164	113.97	49	179	3663	1873	9631	5.91541e-08	1.69865e-06	0.0009	16	0.0141	0.0141	TRUE	0.2881	sprouty RTK signaling antagonist 1 [Source:MGI Symbol;Acc:MGI:1345139]	3	37639947	37644598	1	Spry1	24063
ENSMUSG00000037235	307	341	307	568	621	490	332	336	308	542	581	503	433.74	325	542	1667	737	7466	8.29399	138.67	0	0.0052	0.0046	0.0046	TRUE	0.0473	Max dimerization protein 4 [Source:MGI Symbol;Acc:MGI:104991]	5	34173883	34187720	-1	Mxd4	17122
ENSMUSG00000037341	2	7	4	30	25	38	2	7	4	29	23	39	17.35	4	30	6865	2779	5024	5.06254e+07	4.00436e+08	0	97	0.0886	0.0886	TRUE	0.3586	solute carrier family 9 (sodium/hydrogen exchanger), member 7 [Source:MGI Symbol;Acc:MGI:2444530]	X	20105754	20291807	-1	Slc9a7	236727
ENSMUSG00000037370	30	29	28	94	103	85	32	29	28	90	96	87	60.41	30	91	3072	1619	6471	9765.37	121478	0	0.0289	0.0226	0.0226	TRUE	0.0408	ectonucleotide pyrophosphatase/phosphodiesterase 1 [Source:MGI Symbol;Acc:MGI:97370]	10	24637914	24712159	-1	Enpp1	18605
ENSMUSG00000037386	12	23	13	41	44	41	13	23	13	39	41	42	28.51	16	41	2502	1323	3671	0.000241259640640163	0.00119789221767542	0	0.0596	0.0503	0.0503	TRUE	0.5917	regulating synaptic membrane exocytosis 2 [Source:MGI Symbol;Acc:MGI:2152972]	15	39198261	39684372	1	Rims2	116838
ENSMUSG00000037408	159	200	180	386	429	288	172	197	181	368	402	296	269.2	183	355	1939	955	7214	54.1328	850.945	0.0121	0.0076	0.0085	0.0085	TRUE	0.2428	cyclin M4 [Source:MGI Symbol;Acc:MGI:2151060]	1	36471620	36508764	1	Cnnm4	94220
ENSMUSG00000037411	528	609	508	3341	3460	3383	571	600	510	3188	3239	3471	1929.93	560	3299	5887	2557	37109	2.03931e-287	2.82686e-285	0.0028	0.0023	0.0024	0.0024	TRUE	0.0737	serine (or cysteine) peptidase inhibitor, clade E, member 1 [Source:MGI Symbol;Acc:MGI:97608]	5	137061504	137072268	-1	Serpine1	18787
ENSMUSG00000037568	98	84	120	314	295	253	106	83	120	300	276	260	190.78	103	279	2705	1436	9436	3.88201e-07	1.06462e-05	0.0091	0.0101	0.01	0.01	TRUE	0.3041	vasohibin 2 [Source:MGI Symbol;Acc:MGI:2444826]	1	190947646	190979296	-1	Vash2	226841
ENSMUSG00000037613	43	40	49	116	114	101	47	39	49	111	107	104	76.03	45	107	2379	1.25	5737	964609	9.55088e+06	0	0.0232	0.0183	0.0183	TRUE	0.0981	tumor necrosis factor receptor superfamily, member 23 [Source:MGI Symbol;Acc:MGI:1930269]	7	143665809	143685872	-1	Tnfrsf23	79201
ENSMUSG00000037617	87	97	90	154	156	140	94	96	90	147	146	144	119.45	93	146	1559	641	3814	0.000136821106409379	0.000717170240814786	0	0.0153	0.0115	0.0115	TRUE	0.0077	sperm associated antigen 1 [Source:MGI Symbol;Acc:MGI:1349387]	15	36178099	36235621	1	Spag1	26942
ENSMUSG00000037624	31	44	50	77	77	80	34	43	50	73	72	82	59.12	42	76	1785	836	3412	0.000645581232746672	0.00290549664608065	0	0.0295	0.0248	0.0248	TRUE	0.2389	potassium channel, subfamily K, member 2 [Source:MGI Symbol;Acc:MGI:109366]	1	189207930	189402273	-1	Kcnk2	16526
ENSMUSG00000037649	60	79	78	121	130	103	65	78	78	115	122	106	93.98	74	114	1.55	632	3291	0.000998480072277727	0.00430688094542879	0	0.0191	0.0154	0.0154	TRUE	0.0937	histocompatibility 2, class II, locus DMa [Source:MGI Symbol;Acc:MGI:95921]	17	34119541	34139101	1	H2-DMa	14998
ENSMUSG00000037712	497	581	531	960	1015	956	538	572	533	916	950	981	748.4	548	949	1732	792	10235	1.38658e-11	4.52733e-09	0	0.0036	0.0029	0.0029	TRUE	0.0182	fermitin family member 2 [Source:MGI Symbol;Acc:MGI:2385001]	14	45458795	45530118	-1	Fermt2	218952
ENSMUSG00000037887	60	82	65	162	157	132	65	81	65	155	147	135	107.99	70	146	2.07	1049	5689	1.27762e+06	1.2448e+07	0	0.0168	0.0139	0.0139	TRUE	0.1555	dual specificity phosphatase 8 [Source:MGI Symbol;Acc:MGI:106626]	7	142079490	142095843	-1	Dusp8	18218
ENSMUSG00000037905	350	404	330	644	561	553	379	398	331	615	525	567	469.19	369	569	1541	624	6222	48944.7	564530	0.0052	0.0049	5	5	TRUE	0.0942	Bri3 binding protein [Source:MGI Symbol;Acc:MGI:1924059]	5	125441568	125460370	1	Bri3bp	76809
ENSMUSG00000037936	480	561	487	923	953	847	520	553	489	881	892	869	700.49	521	881	1692	759	9515	1.81093e-07	5.02055e-06	0	0.0038	0.0031	0.0031	TRUE	0.0351	scavenger receptor class B, member 1 [Source:MGI Symbol;Acc:MGI:893578]	5	125277087	125341094	-1	Scarb1	20778
ENSMUSG00000037946	161	181	163	592	620	550	174	178	164	565	580	564	370.97	172	570	3313	1728	16055	5.29889e-44	5.61094e-42	0	0.0059	0.0045	0.0045	TRUE	0.0199	FYVE, RhoGEF and PH domain containing 3 [Source:MGI Symbol;Acc:MGI:1353657]	13	49261554	49320311	-1	Fgd3	30938
ENSMUSG00000037995	11	8	6	36	30	28	12	8	6	34	28	29	19.5	9	30	3556	1.83	4.05	5.12828e+08	0.000289722337555073	0	0.0865	0.0714	0.0714	TRUE	0.3234	immunoglobulin superfamily, member 9 [Source:MGI Symbol;Acc:MGI:2135283]	1	172481788	172498878	1	Igsf9	93842
ENSMUSG00000038059	56	59	61	113	116	106	61	58	61	108	109	109	84.19	60	109	1807	854	4259	2.05671e+09	0.000124595332699844	0	0.0211	16	16	TRUE	0.0067	small integral membrane protein 3 [Source:MGI Symbol;Acc:MGI:1917088]	18	60474191	60501987	-1	Smim3	106878
ENSMUSG00000038074	55	71	83	134	157	101	60	70	83	128	147	104	98.54	71	126	1778	831	4114	3.89125e+09	0.00022560374669863	0.0187	0.0182	0.0183	0.0183	TRUE	0.1572	FK506 binding protein 14 [Source:MGI Symbol;Acc:MGI:2387639]	6	54577604	54597308	-1	Fkbp14	231997
ENSMUSG00000038119	663	696	774	1237	1319	1008	718	685	777	1180	1235	1034	938.26	727	1150	1583	663	8.15	0.00363051	0.74008	0.0053	0.0032	0.0036	0.0036	TRUE	0.0915	cell adhesion molecule-related/down-regulated by oncogenes [Source:MGI Symbol;Acc:MGI:1926387]	9	35421128	35507652	1	Cdon	57810
ENSMUSG00000038168	61	73	92	223	228	201	66	72	92	213	213	206	143.79	77	211	2742	1455	8694	0.000348376	0.00808529	0	0.0129	0.0112	0.0112	TRUE	0.2922	prolyl 3-hydroxylase 2 [Source:MGI Symbol;Acc:MGI:2146663]	16	25959288	26105784	-1	P3h2	210530
ENSMUSG00000038205	84	109	88	230	195	179	91	107	88	219	183	184	145.38	95	195	2042	1.03	6301	29601.3	350980	0	0.0128	0.0114	0.0114	TRUE	0.1295	protein kinase, AMP-activated, beta 2 non-catalytic subunit [Source:MGI Symbol;Acc:MGI:1336185]	3	97658193	97673812	1	Prkab2	108097
ENSMUSG00000038244	718	828	742	2312	2569	2280	777	815	745	2206	2405	2340	1548.02	779	2317	2973	1572	24088	3.35522e-114	1.27901e-111	0.0013	0.0025	0.0022	0.0022	TRUE	0.0213	microtubule associated monooxygenase, calponin and LIM domain containing 2 [Source:MGI Symbol;Acc:MGI:2444947]	7	112225856	112413106	1	Mical2	320878
ENSMUSG00000038244	718	828	742	2312	2569	2280	777	815	745	2206	2405	2340	1548.02	779	2317	2973	1572	24088	3.35522e-114	1.27901e-111	0.0013	0.0025	0.0022	0.0022	TRUE	0.0213	microtubule associated monooxygenase, calponin and LIM domain containing 2 [Source:MGI Symbol;Acc:MGI:2444947]	7	112225856	112413106	1	Mical2	100504195
ENSMUSG00000038248	14	17	19	89	84	62	15	17	19	85	79	64	46.36	17	76	4455	2155	7022	218.686	3253.2	0	0.0372	0.0314	0.0314	TRUE	0.1756	sine oculis binding protein [Source:MGI Symbol;Acc:MGI:1924427]	10	43002500	43174530	-1	Sobp	109205
ENSMUSG00000038264	28	38	36	125	125	117	30	37	36	119	117	120	76.7	34	119	3423	1775	7847	0.426518	8.01917	0	23	0.0181	0.0181	TRUE	0.0789	sema domain, immunoglobulin domain (Ig), and GPI membrane anchor, (semaphorin) 7A [Source:MGI Symbol;Acc:MGI:1306826]	9	57940112	57962865	1	Sema7a	20361
ENSMUSG00000038305	0	0	0	15	11	8	0	0	0	14	10	8	5.47	0	11	58228	5864	4343	1.40548e+09	8.76874e+09	0	0.3047	0.2694	0.2694	TRUE	0.1762	spermatogenesis associated, serine-rich 2-like [Source:MGI Symbol;Acc:MGI:1914448]	1	57774162	57948394	1	Spats2l	67198
ENSMUSG00000038375	92	111	97	199	242	186	100	109	97	190	227	191	152.26	102	203	1983	988	6265	37196.9	436291	0	0.0123	0.0105	0.0105	TRUE	0.1205	transformation related protein 53 inducible nuclear protein 2 [Source:MGI Symbol;Acc:MGI:1915978]	2	155381059	155389850	1	Trp53inp2	68728
ENSMUSG00000038393	265	319	286	516	494	374	287	314	287	492	462	384	371.12	296	446	1508	593	5296	1.18142e+07	1.02296e+08	0.0075	0.0059	0.0062	0.0062	TRUE	0.1706	thioredoxin interacting protein [Source:MGI Symbol;Acc:MGI:1889549]	3	96557957	96561883	1	Txnip	56338
ENSMUSG00000038400	478	529	529	1884	1742	1511	517	521	531	1798	1631	1550	1091.39	523	1660	3173	1666	21914	1.90211e-92	5.47234e-91	0.0028	0.0029	0.0029	0.0029	TRUE	64	prostate transmembrane protein, androgen induced 1 [Source:MGI Symbol;Acc:MGI:1929600]	2	173224458	173276533	-1	Pmepa1	65112
ENSMUSG00000038415	3	7	9	26	26	20	3	7	9	25	24	21	14.81	6	23	3608	1851	3559	0.000372247416281379	0.00177431341152187	0	0.1134	0.0947	0.0947	TRUE	0.4134	forkhead box Q1 [Source:MGI Symbol;Acc:MGI:1298228]	13	31556134	31560976	1	Foxq1	15220
ENSMUSG00000038417	249	241	256	412	433	385	269	237	257	393	405	395	326.23	254	398	1564	645	5999	198214	2.14352e+06	0	0.0065	0.0051	0.0051	TRUE	0.0397	FIG4 phosphoinositide 5-phosphatase [Source:MGI Symbol;Acc:MGI:2143585]	10	41188172	41303260	-1	Fig4	103199
ENSMUSG00000038463	60	73	70	394	373	292	65	72	70	376	349	300	205.31	69	342	4946	2306	14709	5.67966e-35	4.73243e-33	0	0.0095	0.0089	0.0089	TRUE	0.1295	olfactomedin-like 2B [Source:MGI Symbol;Acc:MGI:2443310]	1	170644532	170682789	1	Olfml2b	320078
ENSMUSG00000038473	61	60	70	140	157	150	66	59	70	134	147	154	104.98	65	145	2224	1153	6177	65204.1	742519	0	0.0172	0.0139	0.0139	TRUE	0.0603	nitric oxide synthase 1 (neuronal) adaptor protein [Source:MGI Symbol;Acc:MGI:1917979]	1	170302668	170589861	-1	Nos1ap	70729
ENSMUSG00000038502	345	378	359	585	626	514	373	372	360	558	586	527	462.96	368	557	1512	597	6418	13781.3	169740	0	5	4	4	TRUE	0.0252	prostate tumor over expressed gene 1 [Source:MGI Symbol;Acc:MGI:1933946]	7	44863067	44869788	-1	Ptov1	84113
ENSMUSG00000038530	0	0	0	113	120	105	0	0	0	108	112	108	54.65	0	109	581011	9182	7677	1.62377	2.89243	0	0.0318	0.0265	0.0265	TRUE	0.0711	regulator of G-protein signaling 4 [Source:MGI Symbol;Acc:MGI:108409]	1	169741477	169747642	-1	Rgs4	19736
ENSMUSG00000038552	1	2	2	39	30	31	1	2	2	37	28	32	17.03	2	32	19023	4.25	5.72	1.06703e+06	1.04968e+07	0	0.0988	0.0824	0.0824	TRUE	0.1223	fibronectin type III domain containing 4 [Source:MGI Symbol;Acc:MGI:1917195]	5	31292242	31296080	-1	Fndc4	64339
ENSMUSG00000038587	94	78	81	338	309	371	102	77	81	323	289	381	208.73	87	331	3826	1936	12374	3.6339e-21	1.84086e-19	0.0145	0.0094	0.0102	0.0102	TRUE	0.1871	A kinase (PRKA) anchor protein (gravin) 12 [Source:MGI Symbol;Acc:MGI:1932576]	10	4266380	4359470	1	Akap12	83397
ENSMUSG00000038633	722	826	729	1519	1518	1381	781	813	732	1449	1421	1417	1102.39	775	1429	1843	882	12952	2.29111e-25	1.29869e-22	0	0.0029	0.0023	0.0023	TRUE	0.0293	delta(4)-desaturase, sphingolipid 1 [Source:MGI Symbol;Acc:MGI:1097711]	1	182275772	182282804	-1	Degs1	13244
ENSMUSG00000038668	320	330	366	539	609	518	346	325	367	514	570	532	442.46	346	539	1556	638	6595	4262.22	55030	0	0.0052	0.0044	0.0044	TRUE	0.0339	lysophosphatidic acid receptor 1 [Source:MGI Symbol;Acc:MGI:108429]	4	58435255	58553898	-1	Lpar1	14745
ENSMUSG00000038733	1660	1839	1745	2737	2991	2596	1797	1811	1752	2612	2800	2664	2239.19	1787	2692	1507	592	10801	3.39932e-13	1.27041e-11	0.0005	0.0021	0.0017	0.0017	TRUE	0.0151	WD repeat domain 26 [Source:MGI Symbol;Acc:MGI:1923825]	1	181173228	181212001	-1	Wdr26	226757
ENSMUSG00000038765	2	2	1	20	22	16	2	2	1	19	21	16	10.21	2	19	10978	3457	4335	1.45964e+09	9.09171e+09	0	164	0.1325	0.1325	TRUE	0.1039	LIM homeobox transcription factor 1 beta [Source:MGI Symbol;Acc:MGI:1100513]	2	33560965	33640608	-1	Lmx1b	16917
ENSMUSG00000038803	303	309	305	513	518	486	328	304	306	490	485	499	401.93	313	491	1.57	651	6686	2296.65	30745.6	0	0.0055	0.0042	0.0042	TRUE	0.0197	oligosaccharyltransferase complex subunit 4 (non-catalytic) [Source:MGI Symbol;Acc:MGI:1914945]	5	30905885	30907788	-1	Ost4	67695
ENSMUSG00000038855	22	39	38	373	320	339	24	38	38	356	300	348	183.95	33	335	9932	3312	17201	2.58968e-52	3.43369e-50	0.0074	0.0104	0.0101	0.0101	TRUE	0.4089	inositol 1,4,5-trisphosphate 3-kinase B [Source:MGI Symbol;Acc:MGI:109235]	1	180330485	180424802	1	Itpkb	320404
ENSMUSG00000038886	248	271	271	512	546	431	268	267	272	489	511	442	374.89	269	481	1787	838	8058	0.00773092	1.53691	0	0.0058	0.0049	0.0049	TRUE	0.0559	mannosidase 2, alpha 2 [Source:MGI Symbol;Acc:MGI:2150656]	7	80349097	80371375	-1	Man2a2	140481
ENSMUSG00000039081	55	64	59	237	259	185	60	63	59	226	242	190	140.04	61	219	3624	1858	10511	7.66997e-12	2.65197e-10	0	0.0133	0.0119	0.0119	TRUE	0.1507	zinc finger protein 503 [Source:MGI Symbol;Acc:MGI:1353644]	14	21983959	21989601	-1	Zfp503	218820
ENSMUSG00000039103	38	43	50	191	181	175	41	42	50	182	169	180	110.82	44	177	3.97	1989	10218	1.64284e-10	5.32978e-09	0	0.0164	0.0131	0.0131	TRUE	0.0966	nexilin [Source:MGI Symbol;Acc:MGI:1916060]	3	152236982	152266350	-1	Nexn	68810
ENSMUSG00000039116	202	203	211	616	674	526	219	200	212	588	631	540	398.15	210	586	2793	1482	13.87	9.58885e-30	6.70692e-28	0	0.0056	5	5	TRUE	0.0556	adhesion G protein-coupled receptor G6 [Source:MGI Symbol;Acc:MGI:1916151]	10	14402583	14545659	-1	Adgrg6	215798
ENSMUSG00000039153	728	850	980	1373	1422	1286	788	837	984	1310	1331	1320	1094.97	870	1320	1517	602	7728	1.09653	19.8573	0.0055	0.0029	0.0034	0.0034	TRUE	0.1573	runt related transcription factor 2 [Source:MGI Symbol;Acc:MGI:99829]	17	44495987	44814797	-1	Runx2	12393
ENSMUSG00000039217	63	81	69	176	179	133	68	80	69	168	168	136	114.87	72	157	2173	1.12	6155	74996.1	850216	0	0.0159	0.0137	0.0137	TRUE	0.1389	interleukin 18 [Source:MGI Symbol;Acc:MGI:107936]	9	50554827	50581840	1	Il18	16173
ENSMUSG00000039234	1061	1103	1077	2005	2199	1884	1148	1086	1081	1913	2059	1933	1536.81	1105	1968	1782	833	13421	4.54113e-27	2.81476e-25	0.0008	0.0025	0.0021	0.0021	TRUE	0.0196	Sec24 related gene family, member D (S. cerevisiae) [Source:MGI Symbol;Acc:MGI:1916858]	3	123267455	123365641	1	Sec24d	69608
ENSMUSG00000039316	263	324	330	593	636	537	285	319	331	566	595	551	441.22	312	571	1.83	872	8.93	4.26438e-05	0.00104707	0.0005	0.0052	0.0044	0.0044	TRUE	0.0631	raftlin lipid raft linker 1 [Source:MGI Symbol;Acc:MGI:1923688]	17	49992257	50190674	-1	Rftn1	76438
ENSMUSG00000039328	13	16	18	51	51	35	14	16	18	49	48	36	30.04	16	44	2762	1466	4.16	3.18114e+09	0.000187426598679345	0	0.0566	0.0465	0.0465	TRUE	0.2004	ring finger protein 122 [Source:MGI Symbol;Acc:MGI:1916117]	8	31111820	31131482	1	Rnf122	68867
ENSMUSG00000039384	124	151	148	250	281	237	134	149	149	239	263	243	196.05	144	248	1725	787	5779	74973.8	7.55087e+06	0	0.0099	0.0078	0.0078	TRUE	0.0344	dual specificity phosphatase 10 [Source:MGI Symbol;Acc:MGI:1927070]	1	184013302	184075636	1	Dusp10	63953
ENSMUSG00000039476	242	284	278	490	455	395	262	280	279	468	426	405	353.26	274	433	1582	662	6235	45105	523012	0	0.0061	0.0051	0.0051	TRUE	0.0568	paired related homeobox 2 [Source:MGI Symbol;Acc:MGI:98218]	2	30834972	30881251	1	Prrx2	20204
ENSMUSG00000039477	2356	2828	2762	4402	4417	3811	2550	2785	2773	4200	4135	3910	3392.32	2703	4082	1.51	595	10978	4.89592e-14	1.9191e-12	0.0014	0.0019	0.0018	0.0018	TRUE	0.0294	trinucleotide repeat containing 18 [Source:MGI Symbol;Acc:MGI:3648294]	5	142724661	142817662	-1	Tnrc18	231861
ENSMUSG00000039485	24	30	25	70	58	61	26	30	25	67	54	63	44.05	27	61	2276	1186	4.18	2.91893e+09	0.000172845835102045	0	0.0391	0.0311	0.0311	TRUE	0.0885	TSPY-like 4 [Source:MGI Symbol;Acc:MGI:106393]	10	34297442	34301320	1	Tspyl4	72480
ENSMUSG00000039542	1253	1474	1487	3451	3605	2969	1356	1452	1493	3293	3375	3046	2335.83	1434	3238	2258	1175	19.45	2.9135e-71	5.55312e-68	0.0022	0.0021	0.0021	0.0021	TRUE	0.0323	neural cell adhesion molecule 1 [Source:MGI Symbol;Acc:MGI:97281]	9	49502136	49798925	-1	Ncam1	17967
ENSMUSG00000039568	295	337	334	541	557	461	319	332	335	516	521	473	416.2	329	503	1532	615	6326	25115.1	302015	0	0.0054	0.0043	0.0043	TRUE	0.0322	UBA-like domain containing 1 [Source:MGI Symbol;Acc:MGI:1916255]	16	4874778	4880315	-1	Ubald1	207740
ENSMUSG00000039621	2	5	2	20	19	15	2	5	2	19	18	15	10.23	3	17	5705	2512	3718	0.00020044734544999	0.00101880704114048	0	0.1636	0.1338	0.1338	TRUE	408	phosphatidylinositol-3,4,5-trisphosphate-dependent Rac exchange factor 1 [Source:MGI Symbol;Acc:MGI:3040696]	2	166566342	166713832	-1	Prex1	277360
ENSMUSG00000039747	138	165	139	310	311	298	149	163	140	296	291	306	224.02	151	298	1976	983	7611	2.71424	47.1376	0	0.0088	7	7	TRUE	53	ORAI calcium release-activated calcium modulator 2 [Source:MGI Symbol;Acc:MGI:2443195]	5	136147459	136170713	-1	Orai2	269717
ENSMUSG00000039814	2	2	1	27	37	33	2	2	1	26	35	34	16.57	2	32	18428	4204	5637	1.72738e+06	1.65863e+07	0	0.1016	0.0854	0.0854	TRUE	0.1739	X-linked Kx blood group related 5 [Source:MGI Symbol;Acc:MGI:2442327]	8	18932729	18950975	-1	Xkr5	319581
ENSMUSG00000039910	595	711	641	1402	1402	1218	644	700	644	1338	1312	1250	981.3	663	1300	1962	972	13541	8.99425e-28	5.76237e-26	0.0006	0.0031	0.0026	0.0026	TRUE	0.0296	Cbp/p300-interacting transactivator, with Glu/Asp-rich carboxy-terminal domain, 2 [Source:MGI Symbol;Acc:MGI:1306784]	10	17723218	17725674	1	Cited2	17684
ENSMUSG00000039911	87	88	105	172	186	174	94	87	105	164	174	179	133.84	95	172	1805	852	5208	1.90454e+07	1.5965e+08	0	0.0138	0.0111	0.0111	TRUE	0.0833	splA/ryanodine receptor domain and SOCS box containing 1 [Source:MGI Symbol;Acc:MGI:1921896]	4	149896283	149955043	-1	Spsb1	74646
ENSMUSG00000039943	99	92	122	384	445	394	107	91	122	366	417	404	251.25	107	396	3.71	1891	13803	2.4299e-29	1.67652e-27	0.0044	8	0.0075	0.0075	TRUE	0.1805	phospholipase C, beta 4 [Source:MGI Symbol;Acc:MGI:107464]	2	135659011	136014593	1	Plcb4	18798
ENSMUSG00000039976	62	78	62	141	159	158	67	77	62	135	149	162	108.61	69	149	2158	1.11	5987	214078	2.30201e+06	0	0.0167	14	14	TRUE	0.0983	TBC1 domain family, member 16 [Source:MGI Symbol;Acc:MGI:2652878]	11	119143045	119228499	-1	Tbc1d16	207592
ENSMUSG00000040133	90	114	125	282	258	240	97	112	125	269	242	246	182.01	111	252	2255	1173	7.98	0.146534	2.85722	0	0.0105	0.0091	0.0091	TRUE	0.1197	G protein-coupled receptor 176 [Source:MGI Symbol;Acc:MGI:2685858]	2	118277110	118373419	-1	Gpr176	381413
ENSMUSG00000040152	1761	2046	2102	15761	16242	12997	1906	2015	2110	15039	15205	13336	8268.6	2010	14527	7224	2853	48674	0	0	0.0034	0.0016	0.0022	0.0022	TRUE	0.0628	thrombospondin 1 [Source:MGI Symbol;Acc:MGI:98737]	2	118111876	118127133	1	Thbs1	21825
ENSMUSG00000040183	3	10	11	67	77	60	3	10	11	64	72	62	36.95	8	66	8091	3016	7683	1.55169	27.705	0	0.0463	0.0409	0.0409	TRUE	0.7205	ankyrin repeat domain 6 [Source:MGI Symbol;Acc:MGI:2154278]	4	32804035	32950841	-1	Ankrd6	140577
ENSMUSG00000040209	282	321	302	512	533	492	305	316	303	489	499	505	402.82	308	498	1614	0.69	7125	10.3835	1602.51	0	0.0055	0.0041	0.0041	TRUE	0.0059	zinc finger protein 704 [Source:MGI Symbol;Acc:MGI:2180715]	3	9427020	9610085	-1	Zfp704	170753
ENSMUSG00000040260	59	63	68	844	876	685	64	62	68	805	820	703	420.41	65	776	11996	3585	26029	2.30059e-135	1.06301e-132	0	0.0054	0.0051	0.0051	TRUE	0.0798	dishevelled associated activator of morphogenesis 2 [Source:MGI Symbol;Acc:MGI:1923691]	17	49456022	49564343	-1	Daam2	76441
ENSMUSG00000040265	32	31	39	105	109	87	35	31	39	100	102	89	65.97	35	97	2797	1484	6215	51214	589367	0	0.0266	0.0214	0.0214	TRUE	89	dynamin 3 [Source:MGI Symbol;Acc:MGI:1341299]	1	161982453	162478034	-1	Dnm3	103967
ENSMUSG00000040270	193	262	315	468	494	410	209	258	316	447	462	421	352.15	261	443	1696	762	6149	77938.6	881608	0.0178	0.0061	8	8	TRUE	0.38	BTB and CNC homology, basic leucine zipper transcription factor 2 [Source:MGI Symbol;Acc:MGI:894679]	4	32238804	32586108	1	Bach2	12014
ENSMUSG00000040297	341	350	430	674	702	618	369	345	432	643	657	634	513.32	382	645	1689	756	7908	0.0260905	4.98531	0.0039	0.0046	0.0045	0.0045	TRUE	0.1521	SUN domain containing ossification factor [Source:MGI Symbol;Acc:MGI:2138346]	1	161816114	161876682	-1	Suco	226551
ENSMUSG00000040543	2	0	1	19	24	26	2	0	1	18	22	27	11.74	1	22	21837	4449	4.71	2.4792e+08	1.76237e+09	0	0.1427	123	123	TRUE	0.3525	PITPNM family member 3 [Source:MGI Symbol;Acc:MGI:2685726]	11	72047528	72135778	-1	Pitpnm3	327958
ENSMUSG00000040562	81	68	77	142	182	131	88	67	77	135	170	134	112.04	77	146	1904	929	4984	6.22679e+07	4.85162e+07	0.0098	0.0162	0.0151	0.0151	TRUE	0.2112	glutathione S-transferase, mu 2 [Source:MGI Symbol;Acc:MGI:95861]	3	107981702	107986453	-1	Gstm2	14863
ENSMUSG00000040631	42	52	50	94	79	92	45	51	50	90	74	94	67.49	49	86	1753	0.81	3556	0.000376306187779206	0.00179141952895952	0	26	0.0213	0.0213	TRUE	0.1466	docking protein 4 [Source:MGI Symbol;Acc:MGI:2148865]	8	94863828	94876330	-1	Dok4	114255
ENSMUSG00000040690	102	122	94	317	263	286	110	120	94	302	246	293	194.51	108	280	2.59	1373	9214	3.14451e-07	8.2384e-05	0.0077	0.0099	0.0096	0.0096	TRUE	0.1325	collagen, type XVI, alpha 1 [Source:MGI Symbol;Acc:MGI:1095396]	4	130047840	130099283	1	Col16a1	107581
ENSMUSG00000040699	66	71	56	165	156	131	71	70	56	157	146	134	105.91	66	146	2.22	1.15	6123	91953.7	1.02998e+06	0	0.0171	0.0143	0.0143	TRUE	0.1466	LIM domain containing 2 [Source:MGI Symbol;Acc:MGI:1915053]	11	106156256	106160860	-1	Limd2	67803
ENSMUSG00000040722	0	1	0	8	18	10	0	1	0	8	17	10	5.95	0	12	31649	4984	3718	0.000201194737647974	0.0010221773308175	0	0.28	0.2535	0.2535	TRUE	0.3661	secretory carrier membrane protein 5 [Source:MGI Symbol;Acc:MGI:1928948]	9	57441327	57468060	-1	Scamp5	56807
ENSMUSG00000040811	12	9	9	64	65	46	13	9	9	61	61	47	33.33	10	56	5511	2462	6555	5561.2	70664.3	0	0.0512	0.0432	0.0432	TRUE	0.1709	echinoderm microtubule associated protein like 2 [Source:MGI Symbol;Acc:MGI:1919455]	7	19176421	19206482	1	Eml2	72205
ENSMUSG00000040836	136	157	146	240	286	246	147	155	147	229	268	252	199.59	150	250	1.67	0.74	5452	4.97289e+06	4.50813e+07	0	0.0097	0.0079	0.0079	TRUE	0.0596	G protein-coupled receptor 161 [Source:MGI Symbol;Acc:MGI:2685054]	1	165295789	165326745	1	Gpr161	240888
ENSMUSG00000040843	319	353	321	577	567	516	345	348	322	551	531	529	437.67	338	537	1587	666	7068	156.74	2385.2	0	0.0052	4	4	TRUE	0.02	TIP41, TOR signalling pathway regulator-like (S. cerevisiae) [Source:MGI Symbol;Acc:MGI:1915087]	1	165212286	165236996	-1	Tiprl	226591
ENSMUSG00000040848	233	257	222	537	546	420	252	253	223	512	511	431	363.78	243	485	2	1	9001	2.23284e-05	0.000555406	5	6	0.0058	0.0058	TRUE	0.1082	SFT2 domain containing 2 [Source:MGI Symbol;Acc:MGI:1917362]	1	165174337	165194438	-1	Sft2d2	108735
ENSMUSG00000040852	7	8	10	137	167	115	8	8	10	131	156	118	71.76	9	135	15874	3989	11546	7.7627e-17	3.35313e-15	0	0.0245	0.0224	0.0224	TRUE	0.1641	pleckstrin homology domain containing, family H (with MyTH4 domain) member 2 [Source:MGI Symbol;Acc:MGI:2146813]	17	84511895	84622138	1	Plekhh2	213556
ENSMUSG00000040957	6	3	9	54	53	35	6	3	9	52	50	36	25.92	6	46	7452	2898	6276	34642.5	408530	0.0171	0.0654	0.0597	0.0597	TRUE	0.5324	CDK5 and Abl enzyme substrate 1 [Source:MGI Symbol;Acc:MGI:1927065]	18	11839220	11945630	1	Cables1	63955
ENSMUSG00000040998	1	2	1	19	14	9	1	2	1	18	13	9	7.42	1	13	9936	3313	3.62	0.000294884715616392	0.00144185017719368	0	225	0.1919	0.1919	TRUE	0.0898	nephronectin [Source:MGI Symbol;Acc:MGI:2148811]	3	132881745	132950291	-1	Npnt	114249
ENSMUSG00000041120	129	131	146	246	268	192	140	129	147	235	251	197	182.97	139	228	1647	719	4925	8.44112e+07	6.45164e+08	0.0055	0.0105	0.0095	0.0095	TRUE	0.1489	NBL1, DAN family BMP antagonist [Source:MGI Symbol;Acc:MGI:104591]	4	139082284	139092993	-1	Nbl1	17965
ENSMUSG00000041135	331	304	294	591	544	537	358	299	295	564	509	551	429.5	317	541	1707	771	7529	5.10942	86.7578	0.0038	0.0053	0.0051	0.0051	TRUE	0.1387	receptor (TNFRSF)-interacting serine-threonine kinase 2 [Source:MGI Symbol;Acc:MGI:1891456]	4	16122733	16163647	-1	Ripk2	192656
ENSMUSG00000041180	44	62	52	151	169	118	48	61	52	144	158	121	97.38	54	141	2.63	1395	6891	553.667	7831.45	0	0.0184	0.0166	0.0166	TRUE	0.1573	HECT domain E3 ubiquitin protein ligase 2 [Source:MGI Symbol;Acc:MGI:2442663]	19	36554639	36621135	1	Hectd2	226098
ENSMUSG00000041324	84	98	82	372	372	358	91	97	82	355	348	367	223.38	90	357	3967	1988	14226	6.32016e-32	4.8427e-30	0	0.0088	7	7	TRUE	0.0536	inhibin beta-A [Source:MGI Symbol;Acc:MGI:96570]	13	16011851	16031621	1	Inhba	16323
ENSMUSG00000041355	786	809	746	1278	1317	1278	851	797	749	1219	1233	1311	1026.69	799	1254	1571	652	9046	1.4808e-05	0.00037321	0.0015	3	0.0027	0.0027	TRUE	0.0375	signal sequence receptor, beta [Source:MGI Symbol;Acc:MGI:1913506]	3	88575876	88588419	1	Ssr2	66256
ENSMUSG00000041482	8	8	5	49	41	33	9	8	5	47	38	34	23.43	7	40	5543	2471	5521	3.37686e+06	3.12442e+07	0	0.0722	0.0607	0.0607	TRUE	0.1912	piezo-type mechanosensitive ion channel component 2 [Source:MGI Symbol;Acc:MGI:1918781]	18	63010213	63387183	-1	Piezo2	667742
ENSMUSG00000041559	22	24	22	351	305	284	24	24	22	335	286	291	163.57	23	304	13122	3714	17137	7.80036e-52	1.02534e-49	0	0.0116	0.0102	0.0102	TRUE	0.0908	fibromodulin [Source:MGI Symbol;Acc:MGI:1328364]	1	134037254	134048277	1	Fmod	14264
ENSMUSG00000041605	45	48	54	104	93	85	49	47	54	99	87	87	70.62	50	91	1821	865	3916	8.99753e+09	0.000485815488339724	0	0.0249	0.0196	0.0196	TRUE	0.0585	innate immunity activator [Source:MGI Symbol;Acc:MGI:1921579]	1	136213531	136234264	-1	Inava	67313
ENSMUSG00000041703	2	4	1	45	67	51	2	4	1	43	63	52	27.52	2	53	22108	4467	7174	72.8398	113.681	0	0.0617	0.0556	0.0556	TRUE	0.2783	zinc finger protein of the cerebellum 5 [Source:MGI Symbol;Acc:MGI:1929518]	14	122456795	122465677	-1	Zic5	65100
ENSMUSG00000041729	29	36	32	86	88	88	31	35	32	82	82	90	58.95	33	85	2.57	1362	5501	3.78225e+06	3.4742e+07	0	0.0296	23	23	TRUE	0.0304	coronin, actin binding protein, 2B [Source:MGI Symbol;Acc:MGI:2444283]	9	62419492	62537044	-1	Coro2b	235431
ENSMUSG00000041731	9	12	12	598	586	460	10	12	12	571	549	472	270.8	11	531	47219	5561	20344	5.24046e-78	1.21071e-75	0	0.0075	0.0075	0.0075	TRUE	107	phosphoglucomutase 5 [Source:MGI Symbol;Acc:MGI:1925668]	19	24683016	24861855	-1	Pgm5	226041
ENSMUSG00000041773	511	546	480	1157	1138	1038	553	538	482	1104	1065	1065	801.19	524	1078	2058	1041	13348	1.21951e-26	7.43802e-25	0.0004	0.0035	3	3	TRUE	0.0585	ectodermal-neural cortex 1 [Source:MGI Symbol;Acc:MGI:109610]	13	97241105	97253034	1	Enc1	13803
ENSMUSG00000041774	72	108	99	199	210	183	78	106	99	190	197	188	142.99	94	192	2.02	1014	6227	47623.5	54970.7	0	13	0.0112	0.0112	TRUE	0.2186	YdjC homolog (bacterial) [Source:MGI Symbol;Acc:MGI:1916351]	16	17144621	17160701	1	Ydjc	69101
ENSMUSG00000041794	0	3	0	16	14	16	0	3	0	15	13	16	7.96	1	15	14679	3876	3876	0.00010626419485873	0.000566940672920194	0	0.2099	0.1851	0.1851	TRUE	14405	myosin VIIA and Rab interacting protein [Source:MGI Symbol;Acc:MGI:2384407]	9	120301513	120474841	1	Myrip	245049
ENSMUSG00000041886	26	21	33	178	220	202	28	21	33	170	206	207	110.84	27	194	7124	2833	12583	2.61781e-22	1.36233e-20	0.0081	0.0164	0.0153	0.0153	TRUE	0.3036	metastasis associated in colon cancer 1 [Source:MGI Symbol;Acc:MGI:2685113]	12	119314270	119469987	1	Macc1	238455
ENSMUSG00000041889	215	247	244	392	363	394	233	243	245	374	340	404	306.51	240	373	1549	631	5565	2.62137e+06	2.4658e+07	0	0.0068	0.0058	0.0058	TRUE	0.0691	shisa family member 4 [Source:MGI Symbol;Acc:MGI:1924802]	1	135371057	135375237	-1	Shisa4	77552
ENSMUSG00000041895	246	281	224	478	463	387	266	277	225	456	433	397	342.42	256	429	1677	746	6636	3220.13	42255.2	0.0046	0.0063	6	6	TRUE	0.1273	WD repeat domain, phosphoinositide interacting 1 [Source:MGI Symbol;Acc:MGI:1261864]	11	109573331	109611967	-1	Wipi1	52639
ENSMUSG00000041920	49	36	29	87	84	61	53	35	29	83	79	63	56.97	39	75	1918	939	3.56	0.000370180041960908	0.00176501103183863	0.0311	0.0305	0.0306	0.0306	TRUE	0.6763	solute carrier family 16 (monocarboxylic acid transporters), member 6 [Source:MGI Symbol;Acc:MGI:2144585]	11	109450855	109473598	-1	Slc16a6	104681
ENSMUSG00000041939	230	266	248	435	386	403	249	262	249	415	361	414	324.97	253	397	1565	646	5866	446697	4.62092e+06	0	0.0065	0.0055	0.0055	TRUE	71	mevalonate kinase [Source:MGI Symbol;Acc:MGI:107624]	5	114444269	114460591	1	Mvk	17855
ENSMUSG00000041957	142	167	170	484	502	502	154	164	171	462	470	515	322.62	163	482	2956	1564	13567	6.31779e-28	4.08193e-26	0	0.0065	0.0054	0.0054	TRUE	0.0406	plakophilin 2 [Source:MGI Symbol;Acc:MGI:1914701]	16	16213318	16272712	1	Pkp2	67451
ENSMUSG00000042124	0	0	0	10	7	4	0	0	0	10	7	4	3.37	0	7	35868	5165	3557	0.000374797948140489	0.00178479672493635	0	0.4942	0.4472	0.4472	TRUE	0.0702	late cornified envelope 1F [Source:MGI Symbol;Acc:MGI:1915078]	3	92718685	92720350	-1	Lce1f	67828
ENSMUSG00000042155	42	34	36	138	152	142	45	33	36	132	142	146	89.13	38	140	3658	1871	8701	3.28218e-05	0.0076524	0	0.02	0.0165	0.0165	TRUE	0.1827	kelch-like 23 [Source:MGI Symbol;Acc:MGI:2683536]	2	69821944	69836651	1	Klhl23	277396
ENSMUSG00000042207	314	328	328	694	742	573	340	323	329	662	695	588	489.5	331	648	1962	972	10111	4.95409e-10	1.57375e-08	0.0028	0.0048	0.0044	0.0044	TRUE	0.0769	lysine (K)-specific demethylase 5B [Source:MGI Symbol;Acc:MGI:1922855]	1	134560171	134635285	1	Kdm5b	75605
ENSMUSG00000042228	30	35	25	81	81	86	32	34	25	77	76	88	55.57	30	80	2621	1.39	5368	7.9617e+06	7.07048e+07	0	0.0313	0.0256	0.0256	TRUE	0.1736	LYN proto-oncogene, Src family tyrosine kinase [Source:MGI Symbol;Acc:MGI:96892]	4	3678115	3813122	1	Lyn	17096
ENSMUSG00000042286	4	3	3	48	47	37	4	3	3	46	44	38	23.01	3	43	12496	3643	6574	4907.36	62880.2	0	0.0735	0.0601	0.0601	TRUE	0.0693	stabilin 1 [Source:MGI Symbol;Acc:MGI:2178742]	14	31139013	31168641	-1	Stab1	192187
ENSMUSG00000042363	387	350	365	639	633	571	419	345	366	610	593	586	486.37	377	596	1585	664	6988	278.67	407.789	0.0021	0.0048	0.0043	0.0043	TRUE	0.1077	lectin, galactoside binding-like [Source:MGI Symbol;Acc:MGI:1916114]	11	20823576	20831056	-1	Lgalsl	216551
ENSMUSG00000042439	107	113	122	432	429	348	116	111	122	412	402	357	253.41	116	390	3352	1745	13309	2.04336e-26	1.22185e-24	0	8	0.0068	0.0068	TRUE	0.0627	zinc finger protein 532 [Source:MGI Symbol;Acc:MGI:3036282]	18	65579912	65689443	1	Zfp532	328977
ENSMUSG00000042567	5	2	4	21	13	13	5	2	4	20	12	13	9.49	4	15	4034	2012	3032	0.00243126527792309	0.0094813127769236	0	0.1762	0.1497	0.1497	TRUE	0.3756	NIMA (never in mitosis gene a)- related kinase 10 [Source:MGI Symbol;Acc:MGI:2685128]	14	14803415	15012059	1	Nek10	674895
ENSMUSG00000042821	162	173	171	274	285	304	175	170	172	261	267	312	226.26	172	280	1623	698	5379	747419	6.67251e+07	0	0.0087	0.0074	0.0074	TRUE	0.1094	snail family zinc finger 1 [Source:MGI Symbol;Acc:MGI:98330]	2	167538195	167542814	1	Snai1	20613
ENSMUSG00000042834	80	93	91	357	369	306	87	92	91	341	345	314	211.6	90	333	3.71	1891	13.33	1.54831e-26	9.29473e-25	0	0.0092	0.0074	0.0074	TRUE	0.0289	neuronal regeneration related protein [Source:MGI Symbol;Acc:MGI:99444]	18	33437019	33464029	-1	Nrep	27528
ENSMUSG00000043004	13	20	15	337	332	317	14	20	15	322	311	325	167.74	16	319	19.53	4288	17745	1.89782e-56	2.756e-54	0	0.0113	0.0093	0.0093	TRUE	0.1683	guanine nucleotide binding protein (G protein), gamma 2 [Source:MGI Symbol;Acc:MGI:102705]	14	19872559	19977627	-1	Gng2	14702
ENSMUSG00000043153	1	0	6	34	25	21	1	0	6	32	23	22	14.08	2	26	10841	3438	4917	8.77477e+07	6.68988e+07	0.1073	0.1192	0.1189	0.1189	TRUE	19553	CDP-L-ribitol pyrophosphorylase A [Source:MGI Symbol;Acc:MGI:1923097]	12	36381450	36689503	1	Crppa	75847
ENSMUSG00000043259	189	173	218	559	597	529	205	170	219	533	559	543	371.48	198	545	2756	1463	13237	5.36965e-26	3.17351e-25	0.0008	0.0059	0.0053	0.0053	TRUE	0.1659	family with sequence similarity 13, member C [Source:MGI Symbol;Acc:MGI:1918971]	10	70440481	70558736	1	Fam13c	71721
ENSMUSG00000043336	422	383	424	1264	1368	1248	457	377	426	1206	1281	1281	837.83	420	1256	2994	1582	19343	2.34916e-69	4.42222e-67	0.0023	0.0034	0.0032	0.0032	TRUE	0.0925	filamin A interacting protein 1-like [Source:MGI Symbol;Acc:MGI:1925999]	16	57353093	57573126	1	Filip1l	78749
ENSMUSG00000043391	16	13	14	142	144	126	17	13	14	135	135	129	73.96	15	133	9085	3183	11252	2.25829e-15	9.23172e-14	0	0.0238	0.0192	0.0192	TRUE	0.0986	RIKEN cDNA 2510009E07 gene [Source:MGI Symbol;Acc:MGI:1919440]	16	21649045	21694665	-1	2510009E07Rik	72190
ENSMUSG00000043456	17	14	23	81	104	67	18	14	23	77	97	69	49.78	18	81	4413	2142	7077	147.639	2253.46	0	0.0347	0.0323	0.0323	TRUE	0.2922	zinc finger protein 536 [Source:MGI Symbol;Acc:MGI:1926102]	7	37318024	37773641	-1	Zfp536	243937
ENSMUSG00000043639	510	615	635	1258	1412	1229	552	606	638	1200	1322	1261	929.75	599	1261	2106	1075	14001	1.53671e-30	1.11051e-28	0.0023	0.0032	3	3	TRUE	0.0527	RNA binding motif protein 20 [Source:MGI Symbol;Acc:MGI:1920963]	19	53677306	53867080	1	Rbm20	73713
ENSMUSG00000043969	32	13	20	41	46	57	35	13	20	39	43	58	34.7	23	47	2095	1067	3044	0.00233144966882746	0.00911537039750799	0.0923	0.0492	0.0553	0.0553	TRUE	0.9866	empty spiracles homeobox 2 [Source:MGI Symbol;Acc:MGI:95388]	19	59458372	59465357	1	Emx2	13797
ENSMUSG00000044042	52	46	58	127	163	143	56	45	58	121	153	147	96.72	53	140	2634	1397	6906	499.448	7097.47	0	0.0186	0.0164	0.0164	TRUE	0.1482	formin 1 [Source:MGI Symbol;Acc:MGI:101815]	2	113327736	113716767	1	Fmn1	14260
ENSMUSG00000044250	30	38	49	88	132	73	32	37	49	84	124	75	66.92	39	94	2371	1246	4842	1.28372e+08	9.52054e+08	0.0453	0.0262	0.0297	0.0297	TRUE	0.7364	PC-esterase domain containing 1B [Source:MGI Symbol;Acc:MGI:2446270]	15	97247107	97385680	1	Pced1b	239647
ENSMUSG00000044288	10	17	9	114	133	96	11	17	9	109	125	99	61.4	12	111	9037	3176	10077	6.98928e-10	2.20647e-08	0	0.0284	0.0255	0.0255	TRUE	0.4409	cannabinoid receptor 1 (brain) [Source:MGI Symbol;Acc:MGI:104615]	4	33924593	33948831	1	Cnr1	12801
ENSMUSG00000044320	27	20	17	84	75	89	29	20	17	80	70	91	51.28	22	80	3678	1879	6.52	7015.19	88184.3	0.0085	0.0338	0.0304	0.0304	TRUE	0.37	RIKEN cDNA 1700001O22 gene [Source:MGI Symbol;Acc:MGI:1923631]	2	30794769	30803661	-1	1700001O22Rik	73598
ENSMUSG00000044456	98	114	112	227	263	206	106	112	112	217	246	211	167.5	110	225	2038	1027	6887	570.972	8031.53	0	0.0113	0.0092	0.0092	TRUE	0.0782	Ras and Rab interactor 3 [Source:MGI Symbol;Acc:MGI:2385708]	12	102283048	102390855	1	Rin3	217835
ENSMUSG00000044468	4	7	3	19	14	21	4	7	3	18	13	22	11.17	5	18	3688	1883	3123	0.00178765485396282	0.0072207049571457	0	0.1499	0.1268	0.1268	TRUE	0.2562	terminal nucleotidyltransferase 5C [Source:MGI Symbol;Acc:MGI:1921895]	3	100451628	100489324	-1	Tent5c	74645
ENSMUSG00000044528	9	8	5	119	122	117	10	8	5	114	114	120	61.74	8	116	15.45	3.95	10842	2.1737e-13	8.2041e-12	0	0.0283	0.0233	0.0233	TRUE	0.2436	translocation associated membrane protein 1-like 1 [Source:MGI Symbol;Acc:MGI:2443503]	3	124320855	124324743	1	Tram1l1	229801
ENSMUSG00000044576	6	11	7	31	30	32	6	11	7	30	28	33	19.14	8	30	3696	1886	4139	3.48964e+08	0.000203869837824203	0	0.0881	0.0708	0.0708	TRUE	0.2639	GRB2 associated regulator of MAPK1 subtype 2 [Source:MGI Symbol;Acc:MGI:2685290]	5	30105161	30118378	1	Garem2	242915
ENSMUSG00000044629	5	6	8	57	57	48	5	6	8	54	53	49	29.39	6	52	8095	3017	6976	303.137	4414.74	0	0.0579	0.0465	0.0465	TRUE	0.1155	cannabinoid receptor interacting protein 1 [Source:MGI Symbol;Acc:MGI:1917505]	11	17051586	17079371	1	Cnrip1	380686
ENSMUSG00000044674	121	136	133	247	244	198	131	134	134	236	228	203	177.62	133	222	1676	745	5226	1.73605e+07	1.46574e+08	0	0.0107	0.0086	0.0086	TRUE	0.0617	frizzled class receptor 1 [Source:MGI Symbol;Acc:MGI:1196625]	5	4753839	4758035	-1	Fzd1	14362
ENSMUSG00000044676	0	0	0	20	36	32	0	0	0	19	34	33	14.27	0	29	151.6	7244	5.79	705074	7.11514e+06	0.0622	0.1177	0.1112	0.1112	TRUE	0.5638	zinc finger protein 612 [Source:MGI Symbol;Acc:MGI:2443465]	8	110079746	110092741	1	Zfp612	234725
ENSMUSG00000045107	3	1	1	51	51	46	3	1	1	49	48	47	24.81	2	48	28047	4.81	6749	1491.52	20324.1	0	0.0683	0.0565	0.0565	TRUE	0.4086	SAYSVFN motif domain containing 1 [Source:MGI Symbol;Acc:MGI:1914759]	14	20075636	20138534	-1	Saysd1	67509
ENSMUSG00000045193	106	135	124	200	205	197	115	133	124	191	192	202	159.51	124	195	1569	0.65	4381	1.17898e+09	7.46249e+09	0	0.0118	0.0093	0.0093	TRUE	0.0424	cold inducible RNA binding protein [Source:MGI Symbol;Acc:MGI:893588]	10	80165985	80172786	1	Cirbp	12696
ENSMUSG00000045216	204	202	199	351	346	296	221	199	200	335	324	304	263.68	207	321	1556	638	5367	8.00528e+06	7.10503e+07	0	0.0077	0.0062	0.0062	TRUE	0.0387	heparan sulfate 6-O-sulfotransferase 1 [Source:MGI Symbol;Acc:MGI:1354958]	1	36068400	36106446	1	Hs6st1	50785
ENSMUSG00000045441	363	449	473	757	802	659	393	442	475	722	751	676	576.55	437	716	1.64	714	7.83	0.486373	0.909965	0.0035	0.0043	0.0041	0.0041	TRUE	0.0866	GPRIN family member 3 [Source:MGI Symbol;Acc:MGI:1924785]	6	59347226	59426294	-1	Gprin3	243385
ENSMUSG00000045672	54	63	66	439	417	383	58	62	66	419	390	393	231.5	62	401	6431	2685	17844	3.23224e-57	4.83188e-55	0	0.0086	0.0069	0.0069	TRUE	0.0275	collagen, type XXVII, alpha 1 [Source:MGI Symbol;Acc:MGI:2672118]	4	63214004	63334991	1	Col27a1	373864
ENSMUSG00000045757	6	5	4	20	16	19	6	5	4	19	15	19	11.5	5	18	3482	1.8	3103	0.00191707962997299	0.0076602804501646	0	0.1457	0.1154	0.1154	TRUE	0.1065	zinc finger protein 764 [Source:MGI Symbol;Acc:MGI:2443580]	7	127403668	127406822	-1	Zfp764	233893
ENSMUSG00000045763	729	752	749	1418	1361	1386	789	741	752	1353	1274	1422	1055.15	761	1350	1775	828	11662	1.99145e-17	8.77621e-16	0.0013	3	0.0026	0.0026	TRUE	0.0291	brain abundant, membrane attached signal protein 1 [Source:MGI Symbol;Acc:MGI:1917600]	15	25363277	25413764	-1	Basp1	70350
ENSMUSG00000045777	41	49	52	108	99	84	44	48	52	103	93	86	71.13	48	94	1946	0.96	4325	1.52503e+09	9.4797e+07	0	0.0247	0.0198	0.0198	TRUE	0.0696	interferon induced transmembrane protein 10 [Source:MGI Symbol;Acc:MGI:2444776]	7	142325837	142373753	-1	Ifitm10	320802
ENSMUSG00000045790	0	7	7	24	31	27	0	7	7	23	29	28	15.59	5	27	5613	2489	4.4	1.08064e+09	6.8915e+09	0	0.1078	0.1041	0.1041	TRUE	12922	coiled-coil domain containing 149 [Source:MGI Symbol;Acc:MGI:2685293]	5	52374651	52471521	-1	Ccdc149	100503884
ENSMUSG00000045903	0	0	0	5	7	5	0	0	0	5	7	5	2.74	0	6	29173	4867	3253	0.00114046724559562	0.00484666793780436	0	0.6064	0.5241	0.5241	TRUE	0.0711	neuronal PAS domain protein 4 [Source:MGI Symbol;Acc:MGI:2664186]	19	4984355	4990316	-1	Npas4	225872
ENSMUSG00000046157	16	7	11	55	46	33	17	7	11	52	43	34	27.44	12	43	3708	1891	4744	2.09061e+08	1.50508e+09	0.0418	0.0619	0.0593	0.0593	TRUE	0.2902	transmembrane protein 229B [Source:MGI Symbol;Acc:MGI:2444389]	12	78961795	79007627	-1	Tmem229b	268567
ENSMUSG00000046169	193	200	278	856	902	736	209	197	279	817	844	755	516.9	228	805	3527	1818	16478	5.26676e-47	5.94871e-45	0.0141	0.0046	0.0059	0.0059	TRUE	0.4222	a disintegrin-like and metallopeptidase (reprolysin type) with thrombospondin type 1 motif, 6 [Source:MGI Symbol;Acc:MGI:1347348]	13	104287835	104496695	1	Adamts6	108154
ENSMUSG00000046223	249	228	249	413	462	465	269	225	250	394	432	477	341.29	248	434	1753	0.81	7108	118.058	1816.49	0.0058	0.0063	0.0062	0.0062	TRUE	0.0836	plasminogen activator, urokinase receptor [Source:MGI Symbol;Acc:MGI:97612]	7	24462484	24475968	1	Plaur	18793
ENSMUSG00000046318	28	32	35	81	75	84	30	32	35	77	70	86	55.11	32	78	2406	1267	4944	7.64533e+07	5.87877e+08	0	0.0315	0.0252	0.0252	TRUE	0.0788	collagen and calcium binding EGF domains 1 [Source:MGI Symbol;Acc:MGI:2445053]	18	66045302	66302741	-1	Ccbe1	320924
ENSMUSG00000046532	37	48	52	611	655	573	40	47	52	583	613	588	320.61	46	595	12752	3673	23767	7.30924e-111	2.71832e-108	0	0.0066	0.0054	0.0054	TRUE	0.1084	androgen receptor [Source:MGI Symbol;Acc:MGI:88064]	X	98148769	98323215	1	Ar	11835
ENSMUSG00000046572	40	37	34	320	332	354	43	36	34	305	311	363	182.21	38	326	8619	3107	16819	1.7583e-49	2.19758e-47	0	0.0105	0.0096	0.0096	TRUE	109	zinc finger protein 518B [Source:MGI Symbol;Acc:MGI:2140750]	5	38668484	38684826	-1	Zfp518b	100515
ENSMUSG00000046623	41	46	53	126	112	121	44	45	53	120	105	124	82.02	47	116	2.44	1287	6055	140712	1.54358e+06	0	0.0216	0.0177	0.0177	TRUE	0.0848	gap junction protein, beta 4 [Source:MGI Symbol;Acc:MGI:95722]	4	127351086	127354081	-1	Gjb4	14621
ENSMUSG00000046743	367	450	493	1001	1075	880	397	443	495	955	1006	903	699.97	445	955	2144	1.1	12415	2.17442e-21	1.10519e-19	0.0051	0.0038	4	4	TRUE	0.1107	FAT atypical cadherin 4 [Source:MGI Symbol;Acc:MGI:3045256]	3	38886940	39011985	1	Fat4	329628
ENSMUSG00000046807	24	23	28	61	48	50	26	23	28	58	45	51	38.53	26	51	2013	1.01	3354	0.000797045733735829	0.00352577700841425	0	0.0445	0.0359	0.0359	TRUE	0.1111	leucine rich repeat containing 75B [Source:MGI Symbol;Acc:MGI:2143657]	10	75550123	75560330	-1	Lrrc75b	192734
ENSMUSG00000046841	1156	1193	1121	2143	2281	2073	1251	1175	1125	2045	2135	2127	1643.14	1184	2102	1777	829	13.51	1.36613e-27	8.67951e-26	0.0007	0.0024	0.0021	0.0021	TRUE	0.0291	cytoskeleton-associated protein 4 [Source:MGI Symbol;Acc:MGI:2444926]	10	84526305	84534062	-1	Ckap4	216197
ENSMUSG00000046879	31	42	46	164	175	182	34	41	46	156	164	187	104.69	40	169	4173	2061	10028	1.14928e-09	3.58367e-08	0	0.0173	0.0149	0.0149	TRUE	0.1532	immunity-related GTPase family M member 1 [Source:MGI Symbol;Acc:MGI:107567]	11	48861968	48871683	-1	Irgm1	15944
ENSMUSG00000047139	9	15	11	213	228	199	10	15	11	203	213	204	109.41	12	207	17374	4119	14412	4.36304e-33	3.41168e-31	0	0.0166	0.0136	0.0136	TRUE	0.1878	CD24a antigen [Source:MGI Symbol;Acc:MGI:88323]	10	43578284	43584265	1	Cd24a	12484
ENSMUSG00000047221	218	221	232	362	405	379	236	218	233	345	379	389	300	229	371	1622	698	6179	64321.1	733011	0	0.0069	0.0056	0.0056	TRUE	0.0424	family with sequence similarity 185, member A [Source:MGI Symbol;Acc:MGI:2140983]	5	21424958	21482124	1	Fam185a	330050
ENSMUSG00000047443	2	3	2	136	171	130	2	3	2	130	160	133	71.73	2	141	59203	5888	10209	1.81004e-10	5.84737e-09	0	0.0245	0.0219	0.0219	TRUE	0.1471	erythroferrone [Source:MGI Symbol;Acc:MGI:3606476]	1	91366430	91374217	1	Erfe	227358
ENSMUSG00000047497	217	243	312	753	760	626	235	239	313	719	711	642	476.62	262	691	2631	1395	12871	6.53268e-24	3.67566e-22	0.0109	0.0049	0.0058	0.0058	TRUE	0.3217	a disintegrin-like and metallopeptidase (reprolysin type) with thrombospondin type 1 motif, 12 [Source:MGI Symbol;Acc:MGI:2146046]	15	11064790	11349231	1	Adamts12	239337
ENSMUSG00000047638	7	7	5	49	46	43	8	7	5	47	43	44	25.57	7	45	6892	2785	6.26	38388.5	448886	0	0.0663	0.0528	0.0528	TRUE	0.1002	nuclear receptor subfamily 1, group H, member 4 [Source:MGI Symbol;Acc:MGI:1352464]	10	89454234	89533585	-1	Nr1h4	20186
ENSMUSG00000047669	3	3	2	17	13	12	3	3	2	16	12	12	8.15	3	13	4975	2315	3165	0.00155243146204608	0.00637186404664297	0	0.2049	0.1624	0.1624	TRUE	0.1307	MSL3 like 2 [Source:MGI Symbol;Acc:MGI:1920640]	10	56106917	56116880	1	Msl3l2	73390
ENSMUSG00000047712	237	257	326	560	520	484	257	253	327	534	487	497	392.45	279	506	1813	858	7758	0.863938	15.72	0.0083	0.0056	6	6	TRUE	0.2599	uronyl-2-sulfotransferase [Source:MGI Symbol;Acc:MGI:2442406]	10	8204756	8518825	-1	Ust	338362
ENSMUSG00000047747	115	134	148	479	490	362	124	132	149	457	459	371	282.04	135	429	3178	1668	12723	4.41263e-23	2.38595e-21	0.0083	0.0073	0.0075	0.0075	TRUE	0.1573	ring finger protein 150 [Source:MGI Symbol;Acc:MGI:2443860]	8	82863356	83091268	1	Rnf150	330812
ENSMUSG00000047759	29	27	31	172	176	164	31	27	31	164	165	168	97.71	30	166	5587	2482	11.32	1.04111e-16	4.31383e-14	0	0.0184	0.0145	0.0145	TRUE	0.0577	heparan sulfate (glucosamine) 3-O-sulfotransferase 3A1 [Source:MGI Symbol;Acc:MGI:1333861]	11	64435332	64522841	1	Hs3st3a1	15478
ENSMUSG00000047945	155	169	137	502	530	446	168	166	138	479	496	458	317.43	157	478	3.04	1604	13621	2.997e-28	1.95292e-26	0.0004	0.0066	0.0057	0.0057	TRUE	0.1282	MARCKS-like 1 [Source:MGI Symbol;Acc:MGI:97143]	4	129513581	129515985	1	Marcksl1	17357
ENSMUSG00000048126	1	2	1	20	19	16	1	2	1	19	18	16	9.56	1	18	13058	3707	4268	1.97507e+09	0.000119840192684397	0	175	0.1408	0.1408	TRUE	0.1047	collagen, type VI, alpha 3 [Source:MGI Symbol;Acc:MGI:88461]	1	90765923	90843971	-1	Col6a3	12835
ENSMUSG00000048218	14	20	21	43	50	40	15	20	21	41	47	41	30.8	19	43	2299	1201	3552	0.000382956249760628	0.00182023594025875	0	0.0553	0.0438	0.0438	TRUE	0.1293	adhesion molecule with Ig like domain 2 [Source:MGI Symbol;Acc:MGI:2145995]	15	97244125	97247287	-1	Amigo2	105827
ENSMUSG00000048240	26	24	24	93	84	70	28	24	24	89	79	72	52.51	25	80	3161	1.66	6117	95111	106246	0	33	0.0267	0.0267	TRUE	0.0918	guanine nucleotide binding protein (G protein), gamma 7 [Source:MGI Symbol;Acc:MGI:95787]	10	80948624	81014945	-1	Gng7	14708
ENSMUSG00000048429	144	142	156	282	330	271	156	140	157	269	309	278	218.07	151	285	1894	922	6968	321.404	4667.41	0	9	0.0075	0.0075	TRUE	0.0599	translocase of inner mitochondrial membrane 29 [Source:MGI Symbol;Acc:MGI:1917023]	9	21592722	21595970	1	Timm29	69773
ENSMUSG00000048562	88	89	92	169	147	129	95	88	92	161	138	132	117.75	92	144	1568	649	3741	0.000183623367179132	0.000942089200116891	0	0.0155	0.0128	0.0128	TRUE	0.1196	trans-acting transcription factor 8 [Source:MGI Symbol;Acc:MGI:2443471]	12	118846329	118852576	1	Sp8	320145
ENSMUSG00000048644	48	44	51	97	110	85	52	43	51	93	103	87	71.54	49	94	1934	952	4293	1.75914e+09	0.000108071567388793	0	0.0246	0.0198	0.0198	TRUE	0.0805	cortexin 1 [Source:MGI Symbol;Acc:MGI:88566]	8	4257660	4259274	-1	Ctxn1	330695
ENSMUSG00000048782	29	23	40	219	199	158	31	23	40	209	186	162	108.6	31	186	5929	2568	11547	7.64597e-17	3.3121e-15	0.0171	0.0167	0.0167	0.0167	TRUE	0.2735	INSC spindle orientation adaptor protein [Source:MGI Symbol;Acc:MGI:1917942]	7	114743694	114850383	1	Insc	233752
ENSMUSG00000048826	41	44	28	202	187	157	44	43	28	193	175	161	107.45	38	176	4578	2195	10481	1.05312e-11	3.59238e-10	0.0055	0.0168	0.0156	0.0156	TRUE	0.4252	dishevelled-binding antagonist of beta-catenin 2 [Source:MGI Symbol;Acc:MGI:1920347]	17	14195052	14204304	-1	Dact2	240025
ENSMUSG00000048988	5	3	4	16	18	19	5	3	4	15	17	19	10.67	4	17	4191	2067	3331	0.00086560937978467	0.00378623402838687	0	157	0.1246	0.1246	TRUE	0.1169	leucine rich repeat and fibronectin type III, extracellular 1 [Source:MGI Symbol;Acc:MGI:2442479]	5	139907943	139974722	1	Elfn1	243312
ENSMUSG00000049044	3	7	9	27	20	28	3	7	9	26	19	29	15.4	6	25	3781	1919	3692	0.000222369990262462	0.00111352959327488	0	0.1091	0.0954	0.0954	TRUE	0.4134	Rap guanine nucleotide exchange factor (GEF) 4 [Source:MGI Symbol;Acc:MGI:1917723]	2	71981240	72257474	1	Rapgef4	56508
ENSMUSG00000049047	99	80	75	196	201	194	107	79	75	187	188	199	139.25	87	191	2204	1.14	6744	1544.46	21008	0.0035	0.0133	0.0122	0.0122	TRUE	0.3713	armadillo repeat containing, X-linked 3 [Source:MGI Symbol;Acc:MGI:1918953]	X	134756595	134761455	1	Armcx3	71703
ENSMUSG00000049086	1	0	0	11	7	13	1	0	0	10	7	13	5.25	0	10	27571	4785	3527	0.000420885184095974	0.00198136995588003	0	0.3177	0.2787	0.2787	TRUE	0.4256	brain expressed myelocytomatosis oncogene [Source:MGI Symbol;Acc:MGI:88184]	2	25706739	25707721	1	Bmyc	107771
ENSMUSG00000049502	159	169	180	408	426	312	172	166	181	389	399	320	271.25	173	369	2137	1095	8686	0.000374497	0.00867833	0.0059	0.0075	0.0072	0.0072	TRUE	0.1534	deltex 3-like, E3 ubiquitin ligase [Source:MGI Symbol;Acc:MGI:2656973]	16	35926511	35939151	-1	Dtx3l	209200
ENSMUSG00000049538	0	0	0	4	7	5	0	0	0	4	7	5	2.58	0	5	27474	4.78	3152	0.00162093231319703	0.00661562524401187	0	0.6436	0.5633	0.5633	TRUE	0.0852	a disintegrin-like and metallopeptidase (reprolysin type) with thrombospondin type 1 motif, 16 [Source:MGI Symbol;Acc:MGI:2429637]	13	70727802	70841811	-1	Adamts16	271127
ENSMUSG00000049719	3	2	3	33	34	34	3	2	3	31	32	35	17.74	3	33	11992	3584	5764	821317	8.22288e+06	0	0.0949	0.0764	0.0764	TRUE	77	protease, serine 46 [Source:MGI Symbol;Acc:MGI:1921556]	9	110844506	110856522	1	Prss46	74306
ENSMUSG00000049775	987	1082	943	2648	2721	2617	1068	1066	947	2527	2547	2685	1806.65	1027	2586	2519	1333	20983	9.47756e-84	2.44939e-81	0.0018	0.0023	0.0022	0.0022	TRUE	56	thymosin, beta 4, X chromosome [Source:MGI Symbol;Acc:MGI:99510]	X	167207093	167209315	-1	Tmsb4x	19241
ENSMUSG00000049804	18	17	24	149	160	146	19	17	24	142	150	150	83.68	20	147	7325	2873	11.37	5.9311e-16	2.49139e-15	0	0.0212	0.0173	0.0173	TRUE	0.1691	armadillo repeat containing, X-linked 4 [Source:MGI Symbol;Acc:MGI:2147887]	X	134686519	134696757	1	Armcx4	100503043
ENSMUSG00000049866	370	404	332	737	685	688	400	398	333	703	641	706	530.35	377	683	1812	858	9028	1.75186e-05	0.000438627	4	0.0045	0.0044	0.0044	TRUE	0.1199	ADP-ribosylation factor-like 4C [Source:MGI Symbol;Acc:MGI:2445172]	1	88673125	88702221	-1	Arl4c	320982
ENSMUSG00000049872	7	9	6	29	30	26	8	9	6	28	28	27	17.48	8	28	3669	1875	3967	7.29051e+09	0.000399732783071557	0	0.0963	0.0751	0.0751	TRUE	0.0848	calcium homeostasis modulator family member 5 [Source:MGI Symbol;Acc:MGI:2143897]	10	34087815	34096519	-1	Calhm5	103511
ENSMUSG00000050014	13	8	12	33	28	35	14	8	12	31	26	36	21.27	11	31	2762	1466	3.49	0.000483158375281552	0.00223995102046005	0	0.0794	0.0662	0.0662	TRUE	277	apolipoprotein L 10B [Source:MGI Symbol;Acc:MGI:3043522]	15	77583819	77596125	-1	Apol10b	328561
ENSMUSG00000050199	375	433	447	797	743	631	406	426	449	761	696	647	564.1	427	701	1642	715	7859	0.387267	0.72992	0.0031	0.0043	0.0041	0.0041	TRUE	0.0647	leucine-rich repeat-containing G protein-coupled receptor 4 [Source:MGI Symbol;Acc:MGI:1891468]	2	109917647	110014257	1	Lgr4	107515
ENSMUSG00000050229	276	320	320	508	535	448	299	315	321	485	501	460	396.73	312	482	1545	628	6352	21274.9	25848.6	0	0.0056	0.0044	0.0044	TRUE	0.0184	phosphatidylinositol glycan anchor biosynthesis, class M [Source:MGI Symbol;Acc:MGI:1914806]	1	172376546	172384099	1	Pigm	67556
ENSMUSG00000050271	143	172	208	326	320	241	155	169	209	311	300	247	231.82	178	286	1609	687	4903	9.46182e+07	7.17423e+08	0.0142	0.0086	0.0096	0.0096	TRUE	0.2526	PEAK1 related kinase activating pseudokinase 1 [Source:MGI Symbol;Acc:MGI:1196223]	8	36094828	36147787	1	Prag1	244418
ENSMUSG00000050315	16	8	11	45	50	39	17	8	11	43	47	40	27.67	12	43	3612	1853	4817	1.45834e+08	1.06702e+09	0	0.0614	0.0527	0.0527	TRUE	0.5318	synaptopodin 2 [Source:MGI Symbol;Acc:MGI:2153070]	3	123076519	123236149	-1	Synpo2	118449
ENSMUSG00000050370	0	1	1	20	16	27	0	1	1	19	15	28	10.63	1	21	30209	4917	4.36	1.30213e+09	8.17408e+09	0	0.1575	0.1412	0.1412	TRUE	0.1877	cholesterol 25-hydroxylase [Source:MGI Symbol;Acc:MGI:1333869]	19	34473778	34475164	-1	Ch25h	12642
ENSMUSG00000050395	2	1	1	15	12	7	2	1	1	14	11	7	6.15	1	11	7996	2999	3167	0.00153935135600743	0.00633010503678566	0	0.2713	0.2281	0.2281	TRUE	0.1024	tumor necrosis factor (ligand) superfamily, member 15 [Source:MGI Symbol;Acc:MGI:2180140]	4	63724603	63745113	-1	Tnfsf15	326623
ENSMUSG00000050447	2	8	9	36	38	43	2	8	9	34	36	44	22.19	6	38	5897	2.56	5424	5.82224e+06	5.2407e+07	0	0.0762	0.0683	0.0683	TRUE	0.7339	LY6/PLAUR domain containing 6 [Source:MGI Symbol;Acc:MGI:2443848]	2	50066429	50193569	1	Lypd6	320343
ENSMUSG00000050545	0	1	3	14	13	15	0	1	3	13	12	15	7.49	1	13	10043	3328	3641	0.00027205718615705	0.00133687656284973	0	223	0.1899	0.1899	TRUE	0.7366	family with sequence similarity 228, member B [Source:MGI Symbol;Acc:MGI:2442121]	12	4739888	4769267	-1	Fam228b	207921
ENSMUSG00000050587	3	5	5	37	43	34	3	5	5	35	40	35	20.61	4	37	8.33	3058	5884	401020	4.17674e+06	0	0.0819	0.0659	0.0659	TRUE	0.0852	leucine rich repeat containing 4C [Source:MGI Symbol;Acc:MGI:2442636]	2	96318169	97631666	1	Lrrc4c	241568
ENSMUSG00000050751	0	0	0	14	9	11	0	0	0	13	8	11	5.51	0	11	58561	5872	4359	1.30688e+09	8.20053e+09	0	0.3024	0.2637	0.2637	TRUE	0.1103	piggyBac transposable element derived 5 [Source:MGI Symbol;Acc:MGI:2429955]	8	124369049	124439658	-1	Pgbd5	209966
ENSMUSG00000050953	1591	1705	1546	2897	2900	2653	1722	1679	1552	2764	2715	2722	2192.45	1651	2734	1656	728	12831	1.1004e-23	6.14612e-22	0.0007	0.0022	0.0018	0.0018	TRUE	0.0332	gap junction protein, alpha 1 [Source:MGI Symbol;Acc:MGI:95713]	10	56377330	56402513	1	Gja1	14609
ENSMUSG00000051048	9	16	20	100	92	75	10	16	20	95	86	77	50.68	15	86	5.64	2496	8043	0.0875134	1.73751	0.0012	0.0341	0.0303	0.0303	TRUE	0.3878	procollagen-proline, 2-oxoglutarate 4-dioxygenase (proline 4-hydroxylase), alpha polypeptide III [Source:MGI Symbol;Acc:MGI:2444049]	7	100285520	100319699	1	P4ha3	320452
ENSMUSG00000051159	1	0	1	12	12	11	1	0	1	11	11	11	6.01	1	11	16575	4051	3412	0.000644894390347404	0.00290326237496818	0	0.2775	0.2248	0.2248	TRUE	0.2702	Cbp/p300-interacting transactivator with Glu/Asp-rich carboxy-terminal domain 1 [Source:MGI Symbol;Acc:MGI:108023]	X	102247381	102252181	-1	Cited1	12705
ENSMUSG00000051236	566	560	534	1842	1887	1688	613	552	536	1758	1766	1732	1159.41	567	1752	3095	1.63	23151	1.42102e-104	5.039e-102	0	0.0028	0.0024	0.0024	TRUE	0.0572	methionine sulfoxide reductase B3 [Source:MGI Symbol;Acc:MGI:2443538]	10	120781096	120899101	-1	Msrb3	320183
ENSMUSG00000051367	114	125	113	209	202	160	123	123	113	199	189	164	152.11	120	184	1537	0.62	4022	5.77515e+09	0.000322917024246225	0	0.0123	0.0103	0.0103	TRUE	0.0955	sine oculis-related homeobox 1 [Source:MGI Symbol;Acc:MGI:102780]	12	73040015	73053887	-1	Six1	20471
ENSMUSG00000051439	1	1	0	20	16	17	1	1	0	19	15	17	8.93	1	17	25165	4653	4091	4.29366e+09	0.000246311988643822	0	0.1872	0.1547	0.1547	TRUE	0.2563	CD14 antigen [Source:MGI Symbol;Acc:MGI:88318]	18	36725067	36726798	-1	Cd14	12475
ENSMUSG00000051537	2	6	8	20	25	24	2	6	8	19	23	25	13.87	5	22	4123	2044	3701	0.000215104125546328	0.00108390869343371	0	121	0.1038	0.1038	TRUE	0.5252	predicted pseudogene 5124 [Source:MGI Symbol;Acc:MGI:3643622]	X	21360865	21364622	1	Gm5124	NA
ENSMUSG00000051579	387	403	411	802	777	812	419	397	413	765	727	833	592.37	410	775	1893	921	10499	8.71471e-12	2.99284e-10	0	0.0042	0.0037	0.0037	TRUE	0.05	transcription elongation factor A (SII)-like 8 [Source:MGI Symbol;Acc:MGI:1913934]	X	136168984	136172342	-1	Tceal8	66684
ENSMUSG00000051726	6	12	4	26	36	35	6	12	4	25	34	36	19.46	7	32	4207	2073	4357	1.31807e+09	8.26736e+09	0.0208	0.0867	0.0792	0.0792	TRUE	0.7729	potassium voltage-gated channel, subfamily F, member 1 [Source:MGI Symbol;Acc:MGI:2687399]	12	17172100	17176888	-1	Kcnf1	382571
ENSMUSG00000051855	8	9	9	30	43	30	9	9	9	29	40	31	21.04	9	33	3755	1909	4367	1.26068e+09	7.92369e+09	0	0.0803	0.0654	0.0654	TRUE	0.2495	mesoderm specific transcript [Source:MGI Symbol;Acc:MGI:96968]	6	30723547	30748465	1	Mest	17294
ENSMUSG00000051920	10	15	4	46	55	43	11	15	4	44	51	44	28.19	10	46	4711	2236	5512	3.54825e+06	3.27108e+07	0	0.0603	0.0564	0.0564	TRUE	0.9545	R-spondin 2 [Source:MGI Symbol;Acc:MGI:1922667]	15	43020794	43170826	-1	Rspo2	239405
ENSMUSG00000052353	98	102	124	319	344	303	106	100	124	304	322	311	211.39	110	312	2831	1501	10836	2.33345e-13	8.78528e-12	0	0.0093	0.0076	0.0076	TRUE	0.1278	cell migration inducing protein, hyaluronan binding [Source:MGI Symbol;Acc:MGI:2443629]	7	83932857	84086502	-1	Cemip	80982
ENSMUSG00000052364	32	22	21	49	57	61	35	22	21	47	53	63	40.02	26	54	2.11	1077	3518	0.000435139036804303	0.00203715076241695	0.0135	0.0429	0.0387	0.0387	TRUE	0.5256	RIKEN cDNA B630019K06 gene [Source:MGI Symbol;Acc:MGI:2147918]	X	8892382	8894964	1	B630019K06Rik	NA
ENSMUSG00000052423	92	113	99	176	163	162	100	111	99	168	153	166	132.84	103	162	1567	648	4006	6.17038e+09	0.000342130714574209	0	0.0139	0.0109	0.0109	TRUE	0.0446	UDP-Gal:betaGlcNAc beta 1,4-galactosyltransferase, polypeptide 3 [Source:MGI Symbol;Acc:MGI:1928767]	1	171270328	171276896	1	B4galt3	57370
ENSMUSG00000052430	0	0	1	43	61	52	0	0	1	41	57	53	25.42	0	50	137.78	7106	5835	53736.8	5.49919e+06	0	0.0667	0.0592	0.0592	TRUE	0.4083	bone morphogenetic protein receptor, type 1B [Source:MGI Symbol;Acc:MGI:107191]	3	141837136	142169425	-1	Bmpr1b	12167
ENSMUSG00000052681	1053	1121	1048	1844	1734	1684	1140	1104	1052	1760	1623	1728	1401.11	1099	1704	1551	633	9871	5.56234e-10	1.68953e-07	1	0.0026	0.0022	0.0022	TRUE	0.0208	RAS related protein 1b [Source:MGI Symbol;Acc:MGI:894315]	10	117813871	117846035	-1	Rap1b	215449
ENSMUSG00000052920	2	4	8	20	31	14	2	4	8	19	29	14	12.77	5	21	4397	2136	3575	0.000350881282718478	0.00168670800721669	0.0962	0.1314	0.1265	0.1265	TRUE	0.4455	protein kinase, cGMP-dependent, type I [Source:MGI Symbol;Acc:MGI:108174]	19	30564489	31765033	-1	Prkg1	19091
ENSMUSG00000053007	35	41	39	213	217	188	38	40	39	203	203	193	119.45	39	200	5102	2351	12047	2.00426e-19	9.4616e-18	0	0.0153	12	12	TRUE	0.0096	cAMP responsive element binding protein 5 [Source:MGI Symbol;Acc:MGI:2443973]	6	53287270	53700376	1	Creb5	231991
ENSMUSG00000053101	75	59	61	130	139	87	81	58	61	124	130	89	90.66	67	114	1.72	783	3682	0.000231102504953765	0.00115233845504742	0.0252	0.0197	0.0207	0.0207	TRUE	0.3644	G protein-coupled receptor 141 [Source:MGI Symbol;Acc:MGI:2672983]	13	19749682	19824257	-1	Gpr141	353346
ENSMUSG00000053166	99	102	105	188	158	161	107	100	105	179	148	165	134.25	104	164	1574	654	4015	5.93464e+09	0.000330743384890183	0	0.0138	0.0113	0.0113	TRUE	0.0821	cadherin 22 [Source:MGI Symbol;Acc:MGI:1341843]	2	165111507	165234853	-1	Cdh22	104010
ENSMUSG00000053317	400	481	436	717	709	663	433	474	438	684	664	680	562.09	448	676	1508	592	6.94	392.779	565.009	0	0.0044	0.0034	0.0034	TRUE	0.0293	Sec61 beta subunit [Source:MGI Symbol;Acc:MGI:1913462]	4	47474658	47483242	1	Sec61b	66212
ENSMUSG00000053477	1740	2014	2248	3213	3545	3043	1883	1983	2257	3066	3319	3122	2605.1	2041	3169	1552	634	9678	3.75147e-08	1.08957e-06	0.0048	2	0.0027	0.0027	TRUE	0.1035	transcription factor 4 [Source:MGI Symbol;Acc:MGI:98506]	18	69343356	69689079	1	Tcf4	21413
ENSMUSG00000053846	7	20	19	48	56	52	8	20	19	46	52	53	32.99	16	50	3242	1697	4793	1.64512e+08	1.19679e+09	0	0.0517	0.0479	0.0479	TRUE	0.8467	lipase, endothelial [Source:MGI Symbol;Acc:MGI:1341803]	18	74939322	74961263	-1	Lipg	16891
ENSMUSG00000053931	2562	2799	2678	4572	4499	3999	2773	2757	2689	4363	4212	4103	3482.64	2740	4226	1543	626	12702	5.74902e-23	3.06593e-21	0.0004	0.0019	0.0014	0.0014	TRUE	0.0098	calponin 3, acidic [Source:MGI Symbol;Acc:MGI:1919244]	3	121426497	121458207	1	Cnn3	71994
ENSMUSG00000054074	101	108	104	179	194	185	109	106	104	171	182	190	143.72	106	181	1694	0.76	4881	1.05448e+08	7.92833e+07	0	13	0.01	0.01	TRUE	25	SKI/DACH domain containing 1 [Source:MGI Symbol;Acc:MGI:1919918]	2	18040676	18049051	-1	Skida1	72668
ENSMUSG00000054263	5	6	7	20	28	22	5	6	7	19	26	23	14.37	6	23	3694	1885	3598	0.000320508096359069	0.00155392923792785	0	0.1169	0.0929	0.0929	TRUE	0.1044	LIF receptor alpha [Source:MGI Symbol;Acc:MGI:96788]	15	7090614	7197489	1	Lifr	16880
ENSMUSG00000054364	241	256	241	686	671	623	261	252	242	655	628	639	446.15	252	641	2547	1349	13975	2.22106e-30	1.59748e-29	0	0.0051	0.0039	0.0039	TRUE	0.0126	ras homolog family member B [Source:MGI Symbol;Acc:MGI:107949]	12	8497661	8500009	-1	Rhob	11852
ENSMUSG00000054408	968	1024	925	1893	2054	1683	1048	1008	929	1806	1923	1727	1406.82	995	1819	1829	871	12767	2.50303e-23	1.36796e-22	0.0025	0.0026	0.0026	0.0026	TRUE	0.0406	signal peptidase complex subunit 3 homolog (S. cerevisiae) [Source:MGI Symbol;Acc:MGI:1923937]	8	54520433	54529998	-1	Spcs3	76687
ENSMUSG00000054555	111	86	96	890	911	823	120	85	96	849	853	844	474.63	100	849	8.49	3086	26098	3.83895e-136	1.82926e-133	0	0.0049	0.0044	0.0044	TRUE	0.2767	a disintegrin and metallopeptidase domain 12 (meltrin alpha) [Source:MGI Symbol;Acc:MGI:105378]	7	133883199	134232146	-1	Adam12	11489
ENSMUSG00000054728	7	12	7	45	37	34	8	12	7	43	35	35	23.15	9	38	4242	2085	4886	1.02866e+08	7.76104e+08	0	0.0731	0.0604	0.0604	TRUE	0.2953	phosphatase and actin regulator 1 [Source:MGI Symbol;Acc:MGI:2659021]	13	42680623	43138526	1	Phactr1	218194
ENSMUSG00000054808	2630	2858	2722	4380	4502	4093	2846	2815	2733	4179	4214	4200	3497.96	2798	4198	1.5	585	12356	4.5442e-22	2.29437e-19	0	0.0019	0.0013	0.0013	TRUE	5	actinin alpha 4 [Source:MGI Symbol;Acc:MGI:1890773]	7	28893248	28962340	-1	Actn4	60595
ENSMUSG00000054863	0	0	0	23	21	15	0	0	0	22	20	15	9.5	0	19	101103	6.66	5209	1.8981e+07	1.59198e+08	0	0.1761	0.1524	0.1524	TRUE	0.1414	TAFA chemokine like family member 5 [Source:MGI Symbol;Acc:MGI:2146182]	15	87544299	87759364	1	Tafa5	106014
ENSMUSG00000054932	0	2	3	11	16	13	0	2	3	10	15	13	7.3	2	13	7642	2934	3407	0.000656012937753571	0.00294549036362381	0	0.2287	0.1948	0.1948	TRUE	507	alpha fetoprotein [Source:MGI Symbol;Acc:MGI:87951]	5	90490737	90508907	1	Afp	11576
ENSMUSG00000054942	1	3	4	66	59	59	1	3	4	63	55	61	31.13	3	60	21892	4452	7.69	0.147648	26.4241	0	0.0547	0.0456	0.0456	TRUE	0.2811	mitoguardin 1 [Source:MGI Symbol;Acc:MGI:1924567]	3	152273849	152340407	-1	Miga1	215708
ENSMUSG00000055137	15	18	18	70	82	55	16	18	18	67	77	56	42	17	67	3845	1943	6198	57155.7	655764	0	0.0409	0.0341	0.0341	TRUE	0.0819	succinyl-CoA glutarate-CoA transferase [Source:MGI Symbol;Acc:MGI:1923221]	13	16857472	17695553	-1	Sugct	192136
ENSMUSG00000055148	30	24	30	138	106	103	32	24	30	132	99	106	70.47	29	112	3915	1969	7906	0.266461	5.08511	0	0.0249	0.0225	0.0225	TRUE	0.2348	Kruppel-like factor 2 (lung) [Source:MGI Symbol;Acc:MGI:1342772]	8	72319033	72321656	1	Klf2	16598
ENSMUSG00000055560	3	9	6	23	33	25	3	9	6	22	31	26	16.1	6	26	4.29	2101	4071	4.67437e+09	0.000266149249248802	0	0.1044	0.0895	0.0895	TRUE	0.3892	zinc finger protein 459 [Source:MGI Symbol;Acc:MGI:3040701]	13	67405709	67421418	-1	Zfp459	328274
ENSMUSG00000055629	26	25	22	83	71	73	28	25	22	79	66	75	49.24	25	73	2952	1562	5636	1.74081e+06	1.66942e+07	0	0.0351	0.0282	0.0282	TRUE	0.0711	beta-1,4-N-acetyl-galactosaminyl transferase 4 [Source:MGI Symbol;Acc:MGI:2652891]	7	141061104	141072400	1	B4galnt4	330671
ENSMUSG00000055963	37	43	33	90	102	76	40	42	33	86	95	78	62.48	38	86	2248	1168	4848	1.24491e+08	9.25519e+08	0	28	23	23	TRUE	0.1126	triple QxxK/R motif containing [Source:MGI Symbol;Acc:MGI:3650048]	4	12906838	12983553	1	Triqk	208820
ENSMUSG00000056050	716	843	746	1489	1627	1441	775	830	749	1421	1523	1479	1129.44	785	1474	1878	909	13176	1.21222e-25	7.08197e-24	0.0009	0.0029	0.0025	0.0025	TRUE	0.0311	melanoma inhibitory activity 3 [Source:MGI Symbol;Acc:MGI:2443183]	1	183326725	183369553	-1	Mia3	338366
ENSMUSG00000056091	484	546	561	931	915	794	524	538	563	888	857	815	697.41	542	853	1575	656	8234	0.0180461	0.0374376	0	0.0038	0.0031	0.0031	TRUE	0.0182	ST3 beta-galactoside alpha-2,3-sialyltransferase 5 [Source:MGI Symbol;Acc:MGI:1339963]	6	72097592	72154571	1	St3gal5	20454
ENSMUSG00000056131	116	141	121	206	251	213	126	139	121	197	235	219	172.67	129	217	1684	752	5119	3.07538e+07	2.50901e+08	0	11	0.0093	0.0093	TRUE	0.0739	phosphoglucomutase 3 [Source:MGI Symbol;Acc:MGI:97566]	9	86554377	86571842	-1	Pgm3	109785
ENSMUSG00000056258	0	0	1	13	17	14	0	0	1	12	16	14	7.28	0	14	38831	5279	4048	5.17261e+09	0.000291902334156264	0	0.2293	0.1918	0.1918	TRUE	0.4083	potassium voltage-gated channel, subfamily Q, member 3 [Source:MGI Symbol;Acc:MGI:1336181]	15	65986387	66286642	-1	Kcnq3	110862
ENSMUSG00000056313	55	80	71	152	157	129	60	79	71	145	147	132	105.66	70	141	2021	1015	5457	4.84675e+06	4.39639e+07	0	0.0171	0.0142	0.0142	TRUE	0.1435	transcriptional and immune response regulator [Source:MGI Symbol;Acc:MGI:1916318]	8	24437180	24438984	-1	Tcim	69068
ENSMUSG00000056367	16	18	28	50	46	47	17	18	28	48	43	48	33.69	21	46	2196	1135	3464	0.000533014810373085	0.00244580494389672	0	0.0506	0.0426	0.0426	TRUE	0.4839	ARP3 actin-related protein 3B [Source:MGI Symbol;Acc:MGI:2661120]	5	25759997	25850688	1	Actr3b	242894
ENSMUSG00000056476	6	8	3	79	91	87	6	8	3	75	85	89	44.54	6	83	14373	3845	9155	5.41747e-07	0.000140247	0	0.0387	33	33	TRUE	0.4175	mediator complex subunit 12-like [Source:MGI Symbol;Acc:MGI:2139916]	3	59005825	59318682	1	Med12l	329650
ENSMUSG00000056648	46	53	49	104	96	73	50	52	49	99	90	75	69.2	50	88	1748	806	3573	0.000352786485179022	0.00169533196533556	0	0.0254	21	21	TRUE	0.1572	homeobox B8 [Source:MGI Symbol;Acc:MGI:96189]	11	96281905	96285315	1	Hoxb8	15416
ENSMUSG00000056679	2	1	2	17	20	9	2	1	2	16	19	9	8.22	2	15	8653	3113	3707	0.000209518749943918	0.0010585625908366	0	0.2032	0.1758	0.1758	TRUE	0.3741	G-protein coupled receptor 173 [Source:MGI Symbol;Acc:MGI:1918021]	X	152343598	152368704	-1	Gpr173	70771
ENSMUSG00000056749	261	327	262	621	604	540	282	322	263	593	565	554	429.94	289	571	1973	0.98	9696	3.13582e-08	9.15997e-07	0.0021	0.0053	0.0047	0.0047	TRUE	0.1139	nuclear factor, interleukin 3, regulated [Source:MGI Symbol;Acc:MGI:109495]	13	52967209	52981073	-1	Nfil3	18030
ENSMUSG00000056888	6	7	11	30	33	33	6	7	11	29	31	34	19.64	8	31	3.81	1.93	4262	2.02845e+09	0.000122981242236796	0	0.0859	0.0695	0.0695	TRUE	0.2929	GLI pathogenesis-related 1 (glioma) [Source:MGI Symbol;Acc:MGI:1920940]	10	111985448	112002631	-1	Glipr1	73690
ENSMUSG00000057098	195	214	236	508	586	447	211	211	237	485	549	459	358.46	220	498	2266	1.18	10548	5.19176e-12	1.82405e-10	0.0044	6	0.0057	0.0057	TRUE	0.0955	early B cell factor 1 [Source:MGI Symbol;Acc:MGI:95275]	11	44617317	45008091	1	Ebf1	13591
ENSMUSG00000057123	2	3	2	30	33	19	2	3	2	29	31	19	14.36	2	26	11075	3469	5105	3.30734e+07	2.68532e+08	0	117	0.0999	0.0999	TRUE	315	gap junction protein, alpha 5 [Source:MGI Symbol;Acc:MGI:95716]	3	96904693	97077416	1	Gja5	14613
ENSMUSG00000057143	31	25	26	66	70	66	34	25	26	63	66	68	46.75	28	66	2335	1223	4426	9.59945e+08	6.16824e+09	0	0.0369	0.0294	0.0294	TRUE	0.1757	tripartite motif-containing 12C [Source:MGI Symbol;Acc:MGI:4821183]	7	104338754	104353362	-1	Trim12c	319236
ENSMUSG00000057337	15	12	17	61	53	60	16	12	17	58	50	62	35.75	15	57	3759	1.91	5667	1.45701e+06	1.407e+07	0	0.0478	0.0392	0.0392	TRUE	0.1683	carbohydrate sulfotransferase 3 [Source:MGI Symbol;Acc:MGI:1858224]	10	60181532	60219260	-1	Chst3	53374
ENSMUSG00000057604	57	65	58	166	219	152	62	64	58	158	205	156	117.22	61	173	2826	1499	7939	0.203907	3.92193	0	0.0156	0.0145	0.0145	TRUE	0.2824	LIM and cysteine-rich domains 1 [Source:MGI Symbol;Acc:MGI:1353635]	6	112273758	112330425	1	Lmcd1	30937
ENSMUSG00000057719	0	0	1	15	15	18	0	0	1	14	14	18	7.97	0	15	42536	5411	4179	2.92164e+09	0.000172939132157462	0	0.2095	0.1766	0.1766	TRUE	0.4083	SH3 domain containing ring finger 2 [Source:MGI Symbol;Acc:MGI:2444628]	18	42053667	42158960	1	Sh3rf2	269016
ENSMUSG00000058056	839	924	909	3579	3803	3460	908	910	913	3415	3560	3550	2209.37	910	3508	3854	1946	34445	5.34163e-247	5.8178e-243	0	0.0022	0.0016	0.0016	TRUE	0.0066	palladin, cytoskeletal associated protein [Source:MGI Symbol;Acc:MGI:1919583]	8	61511433	61902690	-1	Palld	72333
ENSMUSG00000058152	6	3	5	31	28	28	6	3	5	30	26	29	16.5	5	28	5888	2558	4777	1.7762e+08	1.28724e+08	0	102	0.0825	0.0825	TRUE	0.2355	chondroitin sulfate synthase 3 [Source:MGI Symbol;Acc:MGI:1926173]	18	59175401	59535999	1	Chsy3	78923
ENSMUSG00000058254	64	62	65	181	186	144	69	61	65	173	174	148	115.03	65	165	2534	1341	7.38	15.8168	25.9003	0	0.0158	13	13	TRUE	0.0857	tetraspanin 7 [Source:MGI Symbol;Acc:MGI:1298407]	X	10485158	10596605	1	Tspan7	21912
ENSMUSG00000058638	184	201	213	316	338	313	199	198	214	302	316	321	258.34	204	313	1537	0.62	5234	1.65952e+07	1.40815e+08	0	0.0078	6	6	TRUE	0.0211	zinc finger protein 110 [Source:MGI Symbol;Acc:MGI:1890378]	7	12834761	12850577	1	Zfp110	65020
ENSMUSG00000058672	303	356	345	602	582	537	328	351	346	574	545	551	449.2	342	557	1629	704	7.54	4.68848	79.8771	0	0.0051	0.0039	0.0039	TRUE	0.0136	tubulin, beta 2A class IIA [Source:MGI Symbol;Acc:MGI:107861]	13	34074274	34078007	-1	Tubb2a	22151
ENSMUSG00000059146	0	0	0	7	7	4	0	0	0	7	7	4	2.89	0	6	30776	4944	3331	0.000864642194138905	0.00378417456263778	0	0.5756	0.5033	0.5033	TRUE	0.1424	neurotrophic tyrosine kinase, receptor, type 3 [Source:MGI Symbol;Acc:MGI:97385]	7	78175959	78738012	-1	Ntrk3	18213
ENSMUSG00000059182	74	77	106	132	152	148	80	76	106	126	142	152	113.74	87	140	1599	678	3683	0.000230908688320296	0.00115174866846839	0.0102	16	0.0151	0.0151	TRUE	0.3464	src family associated phosphoprotein 2 [Source:MGI Symbol;Acc:MGI:1889206]	6	51857422	52012549	-1	Skap2	54353
ENSMUSG00000059327	3	3	5	23	32	19	3	3	5	22	30	19	13.77	4	24	6365	2.67	4451	8.56237e+08	5.55177e+09	0	0.1219	0.1025	0.1025	TRUE	0.3179	ectodysplasin-A [Source:MGI Symbol;Acc:MGI:1195272]	X	99975606	100400762	1	Eda	13607
ENSMUSG00000059430	0	1	1	12	17	11	0	1	1	11	16	11	6.77	1	13	18992	4247	3615	0.000300359476293271	0.00146509318442732	0	0.2463	0.2047	0.2047	TRUE	0.2079	actin, gamma 2, smooth muscle, enteric [Source:MGI Symbol;Acc:MGI:104589]	6	83512905	83536265	-1	Actg2	11468
ENSMUSG00000059878	9	15	9	138	148	113	10	15	9	132	139	116	69.95	11	129	11.47	3.52	11219	3.27666e-15	1.33233e-13	0	0.0251	0.0216	0.0216	TRUE	0.3104	zinc finger protein 422 [Source:MGI Symbol;Acc:MGI:1914505]	6	116624016	116628999	-1	Zfp422	67255
ENSMUSG00000060227	141	144	146	323	364	280	153	142	147	308	341	287	229.55	147	312	2126	1088	8315	0.00917034	0.0196114	0	0.0086	0.0073	0.0073	TRUE	0.0739	cancer susceptibility candidate 4 [Source:MGI Symbol;Acc:MGI:2443129]	2	121866970	121936220	1	Casc4	319996
ENSMUSG00000060244	6	14	9	31	31	24	6	14	9	30	29	25	18.76	10	28	2823	1497	3346	0.000820702396199268	0.0036157382656014	0	0.0899	0.0749	0.0749	TRUE	0.4516	Aly/REF export factor 2 [Source:MGI Symbol;Acc:MGI:1913144]	1	171503478	171504750	1	Alyref2	56009
ENSMUSG00000060314	1	0	0	46	54	55	1	0	0	44	51	56	25.33	0	50	137.14	7.1	5834	541075	5.53341e+06	0	0.0669	0.0576	0.0576	TRUE	0.4732	zinc finger protein 941 [Source:MGI Symbol;Acc:MGI:3039601]	7	140807449	140822178	-1	Zfp941	407812
ENSMUSG00000060429	3	12	9	39	34	48	3	12	9	37	32	49	23.73	8	39	4843	2276	5092	3.54536e+07	2.85879e+08	0.0463	0.0713	0.0687	0.0687	TRUE	0.6408	syntrophin, basic 1 [Source:MGI Symbol;Acc:MGI:101781]	15	55636388	55906949	-1	Sntb1	20649
ENSMUSG00000060579	8	15	22	40	41	34	9	15	22	38	38	35	26.16	15	37	2436	1284	3366	0.000763670192744923	0.00338501252877168	0	0.0648	0.0584	0.0584	TRUE	0.5511	fragile histidine triad gene [Source:MGI Symbol;Acc:MGI:1277947]	14	9550092	11162035	-1	Fhit	14198
ENSMUSG00000060843	4	3	4	13	19	21	4	3	4	12	18	22	10.51	4	17	4587	2197	3427	0.000610099965747176	0.00276738048514447	0	0.1593	0.1319	0.1319	TRUE	0.1335	catenin (cadherin associated protein), alpha 3 [Source:MGI Symbol;Acc:MGI:2661445]	10	63430098	65003667	1	Ctnna3	216033
ENSMUSG00000060935	552	512	550	1027	1096	954	597	504	552	980	1026	979	773.13	551	995	1807	853	10626	2.25476e-13	8.07056e-11	0.0018	0.0036	0.0032	0.0032	TRUE	0.0658	transmembrane protein 263 [Source:MGI Symbol;Acc:MGI:2143652]	10	85102627	85120618	1	Tmem263	103266
ENSMUSG00000061232	165	165	153	273	325	252	179	163	154	261	304	259	219.67	165	275	1667	737	5535	3.11077e+06	2.88873e+07	0.0032	9	0.0079	0.0079	TRUE	0.1029	histocompatibility 2, K1, K region [Source:MGI Symbol;Acc:MGI:95904]	17	33996017	34000347	-1	H2-K1	14972
ENSMUSG00000061353	201	237	231	861	880	808	218	233	232	822	824	829	526.22	228	825	3621	1856	19859	9.26071e-74	2.01725e-73	0	0.0046	0.0035	0.0035	TRUE	0.0159	chemokine (C-X-C motif) ligand 12 [Source:MGI Symbol;Acc:MGI:103556]	6	117168535	117181367	1	Cxcl12	20315
ENSMUSG00000061524	0	0	0	11	8	9	0	0	0	10	7	9	4.54	0	9	48207	5591	4056	4.9954e+09	0.000282738630471652	0	0.3671	316	316	TRUE	81	zinc finger protein of the cerebellum 2 [Source:MGI Symbol;Acc:MGI:106679]	14	122475435	122479852	1	Zic2	22772
ENSMUSG00000061751	1147	1308	1654	2293	2375	2115	1241	1288	1661	2188	2223	2170	1795.29	1397	2194	1571	651	4792	1.64848e+08	1.19867e+09	0.0127	0.0023	0.0044	0.0127	TRUE	0.3288	kalirin, RhoGEF kinase [Source:MGI Symbol;Acc:MGI:2685385]	16	33969073	34573532	-1	Kalrn	545156
ENSMUSG00000061878	67	57	51	146	149	120	73	56	51	139	139	123	96.96	60	134	2243	1165	5879	411753	427976	0.0004	0.0185	0.0161	0.0161	TRUE	0.2764	sphingosine kinase 1 [Source:MGI Symbol;Acc:MGI:1316649]	11	116530925	116536675	1	Sphk1	20698
ENSMUSG00000062184	194	214	273	483	569	489	210	211	274	461	533	502	365.02	232	499	2151	1105	9462	3.0312e-07	8.37315e-06	0.0105	6	0.0066	0.0066	TRUE	0.2863	heparan sulfate 6-O-sulfotransferase 2 [Source:MGI Symbol;Acc:MGI:1354959]	X	51387212	51681856	-1	Hs6st2	50786
ENSMUSG00000062421	132	176	158	382	377	353	143	173	159	365	353	362	259.08	158	360	2.27	1183	9601	7.91098e-08	2.2547e-06	0	0.0078	0.0064	0.0064	TRUE	0.0738	ADP-ribosylation factor 2 [Source:MGI Symbol;Acc:MGI:99595]	11	103966739	103985337	1	Arf2	11841
ENSMUSG00000062590	176	223	192	316	328	303	190	220	193	302	307	311	253.73	201	307	1524	608	5038	4.71335e+07	3.74319e+08	0	0.0079	0.0064	0.0064	TRUE	73	armadillo repeat containing 9 [Source:MGI Symbol;Acc:MGI:1926045]	1	86154780	86278284	1	Armc9	78795
ENSMUSG00000062866	99	95	85	300	322	303	107	94	85	286	301	311	197.44	95	299	3146	1654	11411	3.66967e-16	1.55e-14	0	0.0098	0.0081	0.0081	TRUE	0.1083	phosphatase and actin regulator 2 [Source:MGI Symbol;Acc:MGI:2446138]	10	13207717	13474412	-1	Phactr2	215789
ENSMUSG00000062963	251	260	234	477	473	455	272	256	235	455	443	467	354.58	254	455	1.79	0.84	7.98	0.146902	2.86075	0	0.0061	0.0049	0.0049	TRUE	49	ubiquitin-fold modifier conjugating enzyme 1 [Source:MGI Symbol;Acc:MGI:1913405]	1	171288563	171295024	-1	Ufc1	66155
ENSMUSG00000062980	4	4	12	24	21	22	4	4	12	23	20	23	14.24	7	22	3193	1675	3145	0.00166115996991212	0.00676171041676991	0	0.1179	0.1068	0.1068	TRUE	12182	cadherin-like and PC-esterase domain containing 1 [Source:MGI Symbol;Acc:MGI:2444814]	6	21985916	22256404	1	Cped1	214642
ENSMUSG00000063142	0	5	2	19	26	21	0	5	2	18	24	22	11.82	2	21	9013	3172	4451	8.56358e+08	5.55177e+09	0	0.1417	0.1274	0.1274	TRUE	10158	potassium large conductance calcium-activated channel, subfamily M, alpha member 1 [Source:MGI Symbol;Acc:MGI:99923]	14	23289431	24014491	-1	Kcnma1	16531
ENSMUSG00000063296	23	16	29	106	124	82	25	16	29	101	116	84	61.86	23	100	4335	2116	7711	1.24897	22.4845	0.0218	0.0282	0.0274	0.0274	TRUE	0.2785	transmembrane protein 117 [Source:MGI Symbol;Acc:MGI:2444580]	15	94629232	95096098	1	Tmem117	320709
ENSMUSG00000063458	4	16	11	52	47	41	4	16	11	50	44	42	27.8	10	45	4312	2108	5248	1.53848e+07	1.31128e+08	0	0.0611	0.0569	0.0569	TRUE	0.8418	leucine rich melanocyte differentiation associated [Source:MGI Symbol;Acc:MGI:1923883]	14	22019712	23056085	1	Lrmda	76633
ENSMUSG00000063531	0	2	0	23	26	22	0	2	0	22	24	23	11.81	1	23	33785	5078	4563	5.04642e+07	3.40326e+09	0	0.1419	0.1195	0.1195	TRUE	0.9731	sema domain, immunoglobulin domain (Ig), short basic domain, secreted, (semaphorin) 3E [Source:MGI Symbol;Acc:MGI:1340034]	5	14025276	14256689	1	Sema3e	20349
ENSMUSG00000063605	106	145	147	237	220	221	115	143	148	226	206	227	177.33	135	220	1623	698	4773	1.81161e+08	1.31165e+09	0.0016	0.0108	0.0094	0.0094	TRUE	0.1716	coiled-coil domain containing 102A [Source:MGI Symbol;Acc:MGI:2686927]	8	94902869	94918098	-1	Ccdc102a	234582
ENSMUSG00000063632	211	207	194	323	348	400	228	204	195	308	326	410	278.57	209	348	1665	736	5649	1.61797e+06	1.55946e+07	0.0125	0.0074	0.0084	0.0084	TRUE	0.2762	SRY (sex determining region Y)-box 11 [Source:MGI Symbol;Acc:MGI:98359]	12	27334264	27342574	-1	Sox11	20666
ENSMUSG00000063727	8	9	17	37	28	29	9	9	17	35	26	30	20.98	12	30	2632	1396	3278	0.00104710861093896	0.00449249074271168	0.0064	0.0805	0.0705	0.0705	TRUE	685	tumor necrosis factor receptor superfamily, member 11b (osteoprotegerin) [Source:MGI Symbol;Acc:MGI:109587]	15	54250619	54278484	-1	Tnfrsf11b	18383
ENSMUSG00000063919	23	18	15	44	35	49	25	18	15	42	33	50	30.45	19	42	2172	1119	3195	0.00139884660575988	0.00582140094012738	0.0001	0.0559	0.05	0.05	TRUE	0.1819	serine/arginine repetitive matrix 4 [Source:MGI Symbol;Acc:MGI:1916205]	5	116439275	116591817	-1	Srrm4	68955
ENSMUSG00000066357	561	575	513	926	920	812	607	566	515	884	861	833	711.09	563	859	1528	612	7462	8.52405	142.36	0.0016	0.0037	0.0034	0.0034	TRUE	0.0646	WD repeat domain 6 [Source:MGI Symbol;Acc:MGI:1930140]	9	108572311	108578739	-1	Wdr6	83669
ENSMUSG00000066842	19	28	33	60	61	42	21	28	33	57	57	43	39.79	27	52	1935	952	3.15	0.00163373389923177	0.00666430564352222	0	0.0431	0.0378	0.0378	TRUE	0.2626	hemicentin 1 [Source:MGI Symbol;Acc:MGI:2685047]	1	150562524	150993435	-1	Hmcn1	545370
ENSMUSG00000066894	36	38	29	98	84	103	39	37	29	94	79	106	63.89	35	93	2633	1397	5662	1.4974e+06	1.44509e+07	0	0.0274	0.0241	0.0241	TRUE	0.1287	V-set and immunoglobulin domain containing 10 [Source:MGI Symbol;Acc:MGI:2448533]	5	117319083	117355005	1	Vsig10	231668
ENSMUSG00000067276	26	24	25	57	77	50	28	24	25	54	72	51	42.44	26	59	2.32	1214	4116	3.85975e+09	0.000224118119176163	0	0.0405	0.0345	0.0345	TRUE	317	calpain 6 [Source:MGI Symbol;Acc:MGI:1100850]	X	143802231	143827414	-1	Capn6	12338
ENSMUSG00000067377	76	69	63	116	141	89	82	68	63	111	132	91	91.24	71	111	1.57	651	3.16	0.00157542703627895	0.00645062068989833	0.0164	0.0196	19	19	TRUE	0.1447	tetraspanin 6 [Source:MGI Symbol;Acc:MGI:1926264]	X	133891068	133898429	-1	Tspan6	56496
ENSMUSG00000068742	70	81	70	125	127	105	76	80	70	119	119	108	95.29	75	115	1533	616	3264	0.00110008533339225	0.00468943281061363	0	0.0188	0.0147	0.0147	TRUE	0.0323	cryptochrome 2 (photolyase-like) [Source:MGI Symbol;Acc:MGI:1270859]	2	92403646	92434043	-1	Cry2	12953
ENSMUSG00000068923	82	82	82	157	158	130	89	81	82	150	148	133	113.82	84	144	1714	778	4452	8.48965e+08	5.51791e+09	0	16	0.0125	0.0125	TRUE	0.0401	synaptotagmin XI [Source:MGI Symbol;Acc:MGI:1859547]	3	88744700	88775164	-1	Syt11	229521
ENSMUSG00000069114	225	263	271	449	422	402	244	259	272	428	395	412	335.1	258	412	1594	673	6298	30142.5	356843	0	0.0064	0.0051	0.0051	TRUE	0.0267	zinc finger and BTB domain containing 10 [Source:MGI Symbol;Acc:MGI:2139883]	3	9250602	9285333	1	Zbtb10	229055
ENSMUSG00000069378	3	2	2	56	67	53	3	2	2	53	63	54	29.63	2	57	23826	4574	7468	8.1184	136.332	0	0.0574	0.0477	0.0477	TRUE	0.0891	PR domain containing 6 [Source:MGI Symbol;Acc:MGI:2684938]	18	53463583	53575907	1	Prdm6	225518
ENSMUSG00000069520	310	316	317	579	561	436	336	311	318	552	525	447	415.01	322	508	1582	662	6341	22804.6	276190	5	0.0054	0.0053	0.0053	TRUE	0.1262	transmembrane protein 19 [Source:MGI Symbol;Acc:MGI:1914476]	10	115339674	115362501	-1	Tmem19	67226
ENSMUSG00000069601	585	646	748	1414	1441	1350	633	636	751	1349	1349	1385	1017.3	673	1361	2.02	1015	13.36	1.03723e-26	6.35165e-25	3	3	3	3	TRUE	0.1204	ankyrin 3, epithelial [Source:MGI Symbol;Acc:MGI:88026]	10	69398773	70027438	1	Ank3	11735
ENSMUSG00000069662	2073	2199	2036	3655	3594	3232	2244	2166	2044	3488	3364	3316	2770.32	2151	3389	1576	656	12113	8.97833e-20	4.30508e-20	0.0009	2	0.0017	0.0017	TRUE	0.0229	myristoylated alanine rich protein kinase C substrate [Source:MGI Symbol;Acc:MGI:96907]	10	37133375	37138920	-1	Marcks	17118
ENSMUSG00000069670	27	25	50	62	105	61	29	25	50	59	98	63	54.02	35	73	2116	1081	3659	0.000253506598377747	0.00125298820488295	0.0891	0.0321	0.0416	0.0416	TRUE	11002	Na+/K+ transporting ATPase interacting 2 [Source:MGI Symbol;Acc:MGI:1923447]	10	31689310	32890462	-1	Nkain2	432450
ENSMUSG00000069806	13	21	18	59	44	39	14	21	18	56	41	40	31.72	18	46	2596	1376	3991	6.58177e+09	0.000363355858022107	0	0.0537	0.0462	0.0462	TRUE	0.3224	calcium channel, voltage-dependent, gamma subunit 7 [Source:MGI Symbol;Acc:MGI:1932374]	7	3332955	3368221	1	Cacng7	81904
ENSMUSG00000070284	73	84	77	158	178	145	79	83	77	151	167	149	117.54	80	156	1951	964	5558	2.72308e+06	2.55046e+07	0	0.0155	0.0121	0.0121	TRUE	43	GDP-mannose pyrophosphorylase B [Source:MGI Symbol;Acc:MGI:2660880]	9	108049242	108052801	1	Gmppb	331026
ENSMUSG00000070407	9	17	11	68	72	77	10	17	11	65	67	79	41.47	13	70	5595	2484	7328	23.3848	37.8125	0	0.0414	0.0353	0.0353	TRUE	0.3666	heparan sulfate (glucosamine) 3-O-sulfotransferase 3B1 [Source:MGI Symbol;Acc:MGI:1333853]	11	63885792	63922290	-1	Hs3st3b1	54710
ENSMUSG00000070436	4572	5229	4474	10605	10731	9515	4948	5150	4492	10119	10046	9763	7419.73	4863	9976	2051	1037	19719	1.47052e-72	3.11423e-70	0.0024	0.0016	0.0018	0.0018	TRUE	0.0546	serine (or cysteine) peptidase inhibitor, clade H, member 1 [Source:MGI Symbol;Acc:MGI:88283]	7	99345376	99353239	-1	Serpinh1	12406
ENSMUSG00000070461	16	38	35	74	82	71	17	37	35	71	77	73	51.68	30	74	2435	1284	4606	4.1091e+08	2.81345e+08	0.0207	0.0335	0.0324	0.0324	TRUE	0.8444	RIKEN cDNA 9230112E08 gene [Source:MGI Symbol;Acc:MGI:2444774]	2	180983924	180987275	1	9230112E08Rik	NA
ENSMUSG00000070469	1183	1430	1550	2319	2362	1945	1280	1408	1556	2213	2211	1996	1777.44	1415	2140	1512	596	8315	0.00919267	0.196316	0.0056	0.0023	0.0031	0.0031	TRUE	0.0915	ADAMTS-like 3 [Source:MGI Symbol;Acc:MGI:3028499]	7	82335694	82614450	1	Adamtsl3	269959
ENSMUSG00000070524	4	6	7	23	25	23	4	6	7	22	23	24	14.37	6	23	3976	1991	3769	0.000163706486372912	0.000846455240493102	0	0.1169	0.0915	0.0915	TRUE	0.0964	Fc receptor-like B [Source:MGI Symbol;Acc:MGI:3576487]	1	170907273	170912941	-1	Fcrlb	435653
ENSMUSG00000070526	37	45	38	185	164	179	40	44	38	177	154	184	106.04	41	172	4188	2066	10192	2.16257e-10	6.94207e-09	0	0.0171	0.0143	0.0143	TRUE	0.0891	paternally expressed 12 [Source:MGI Symbol;Acc:MGI:1351637]	7	62461871	62464510	-1	Peg12	27412
ENSMUSG00000070576	285	302	283	1386	1480	1187	308	297	284	1323	1385	1218	802.67	296	1309	4415	2142	24964	1.50383e-123	6.03432e-121	0	0.0035	0.0032	0.0032	TRUE	0.0437	meningioma 1 [Source:MGI Symbol;Acc:MGI:1261813]	5	111417362	111457033	1	Mn1	433938
ENSMUSG00000070858	5	4	7	17	25	16	5	4	7	16	23	16	12.07	5	18	3.43	1778	3124	0.00178467765170146	0.00721058951593638	0	0.1389	0.1138	0.1138	TRUE	0.2686	predicted gene 1673 [Source:MGI Symbol;Acc:MGI:2686519]	5	33983433	33985013	1	Gm1673	381633
ENSMUSG00000071253	176	180	170	323	339	251	190	177	171	308	317	258	236.92	179	294	1643	716	5513	3.53645e+06	3.26217e+07	0.0045	0.0084	0.0077	0.0077	TRUE	0.1325	solute carrier family 25 (mitochondrial carrier, Graves disease autoantigen), member 16 [Source:MGI Symbol;Acc:MGI:1920382]	10	62920633	62946498	1	Slc25a16	73132
ENSMUSG00000071757	324	397	354	643	669	606	351	391	355	614	626	622	493.12	366	621	1696	762	8.39	0.0048415	0.105613	0	0.0048	0.0038	0.0038	TRUE	0.0426	zinc fingers and homeoboxes 2 [Source:MGI Symbol;Acc:MGI:2683087]	15	57694665	57839832	1	Zhx2	387609
ENSMUSG00000071984	5	3	4	98	114	62	5	3	4	94	107	64	46.04	4	88	21525	4428	9133	6.66638e-06	0.000172286	0	0.0374	39	39	TRUE	0.1792	fibronectin type III domain containing 1 [Source:MGI Symbol;Acc:MGI:1915905]	17	7738569	7827302	-1	Fndc1	68655
ENSMUSG00000072663	0	0	3	13	12	6	0	0	3	12	11	6	5.47	1	10	9779	3.29	3049	0.00229511350917901	0.00899406085529725	57	0.3048	288	288	TRUE	14415	sperm flagellar 2 [Source:MGI Symbol;Acc:MGI:2443727]	15	9578193	9748868	-1	Spef2	320277
ENSMUSG00000073295	0	0	0	25	29	24	0	0	0	24	27	25	12.6	0	25	134027	7066	5.64	1.70487e+06	1.63908e+06	0	133	0.1122	0.1122	TRUE	0.0711	nudix (nucleoside diphosphate linked moiety X)-type motif 11 [Source:MGI Symbol;Acc:MGI:1930957]	X	6047453	6055110	1	Nudt11	58242
ENSMUSG00000073427	153	141	160	261	271	234	166	139	161	249	254	240	201.32	155	248	1599	678	5029	4.94037e+07	3.92143e+08	0	0.0096	0.0078	0.0078	TRUE	0.0894	predicted gene 4924 [Source:MGI Symbol;Acc:MGI:3643133]	10	82354255	82422882	1	Gm4924	237412
ENSMUSG00000073433	3	2	4	20	15	19	3	2	4	19	14	19	10.31	3	17	5708	2513	3735	0.000187714388713679	0.0009617839378717	0	0.1623	132	132	TRUE	0.1617	Rho GDP dissociation inhibitor (GDI) gamma [Source:MGI Symbol;Acc:MGI:108430]	17	26199183	26207786	-1	Arhgdig	14570
ENSMUSG00000073530	70	65	59	157	144	102	76	64	59	150	135	105	98.05	66	130	1962	973	4.82	1.43351e+08	1.05037e+09	0.0158	0.0183	0.0179	0.0179	TRUE	287	pappalysin 2 [Source:MGI Symbol;Acc:MGI:3051647]	1	158711727	158980490	-1	Pappa2	23850
ENSMUSG00000073968	16	25	25	48	50	42	17	25	25	46	47	43	33.79	22	45	2019	1013	3166	0.00154600793537527	0.00635405094301943	0	0.0505	0.0403	0.0403	TRUE	0.2073	tripartite motif-containing 68 [Source:MGI Symbol;Acc:MGI:2142077]	7	102677582	102687327	-1	Trim68	101700
ENSMUSG00000073988	1	3	1	19	18	16	1	3	1	18	17	16	9.41	2	17	10087	3334	4112	3.91553e+09	0.000226838953114386	0	0.1778	0.1446	0.1446	TRUE	0.3512	tocopherol (alpha) transfer protein [Source:MGI Symbol;Acc:MGI:1354168]	4	20007938	20030785	1	Ttpa	50500
ENSMUSG00000074259	29	33	31	78	87	58	31	33	31	74	81	60	51.73	32	72	2.27	1183	4458	8.28616e+08	5.39254e+09	0	0.0335	0.0278	0.0278	TRUE	0.1982	GRAM domain containing 2 [Source:MGI Symbol;Acc:MGI:3528937]	9	59680144	59718874	1	Gramd2	546134
ENSMUSG00000074676	26	24	24	58	53	47	28	24	24	55	50	48	38.18	25	51	2023	1017	3394	0.000690004198007264	0.00308720188122499	0	0.0449	0.0349	0.0349	TRUE	0.0559	forkhead box S1 [Source:MGI Symbol;Acc:MGI:95546]	2	152931898	152933208	-1	Foxs1	14239
ENSMUSG00000074934	102	75	85	416	428	441	110	74	85	397	401	453	253.29	90	417	4653	2218	15358	3.13697e-39	2.95262e-37	0.0099	8	0.0082	0.0082	TRUE	367	gremlin 1, DAN family BMP antagonist [Source:MGI Symbol;Acc:MGI:1344337]	2	113746164	113758646	-1	Grem1	23892
ENSMUSG00000074971	3	3	3	26	17	18	3	3	3	25	16	18	11.4	3	20	6433	2686	4082	4.47129e+09	0.000255636352455493	0	0.1469	0.1207	0.1207	TRUE	0.2838	fin bud initiation factor homolog (zebrafish) [Source:MGI Symbol;Acc:MGI:1914856]	2	110360917	110363183	-1	Fibin	67606
ENSMUSG00000075014	27	38	60	527	522	638	29	37	60	503	489	655	295.51	42	549	12944	3694	12062	1.67918e-20	7.97635e-18	0.0546	7	0.0112	0.0546	TRUE	10567	predicted gene 10800 [Source:MGI Symbol;Acc:MGI:3641657]	2	98666547	98667301	-1	Gm10800	NA
ENSMUSG00000075015	2	3	14	62	61	64	2	3	14	59	57	66	33.52	6	61	9393	3232	7293	30.2382	486.363	0.2363	0.0509	0.0542	0.0542	TRUE	27348	predicted gene 10801 [Source:MGI Symbol;Acc:MGI:3641656]	2	98662237	98664083	1	Gm10801	NA
ENSMUSG00000075701	159	185	158	357	356	323	172	182	159	341	333	331	253.04	171	335	1.96	971	7974	0.154081	0.298909	0	8	0.0062	0.0062	TRUE	0.0435	selenoprotein S [Source:MGI Symbol;Acc:MGI:95994]	7	66079649	66089405	1	Selenos	109815
ENSMUSG00000075704	69	88	78	134	164	125	75	87	78	128	154	128	108.22	80	137	1709	773	4.24	2.23053e+09	0.00013453740107209	0	0.0167	14	14	TRUE	0.1251	thioredoxin reductase 2 [Source:MGI Symbol;Acc:MGI:1347023]	16	18426384	18479073	1	Txnrd2	26462
ENSMUSG00000076435	44	47	33	161	174	134	48	46	33	154	163	137	96.84	42	151	3582	1841	8795	0.000142563	0.00337546	0	0.0185	0.0163	0.0163	TRUE	0.2818	acyl-CoA synthetase family member 2 [Source:MGI Symbol;Acc:MGI:2388287]	11	94557102	94601871	-1	Acsf2	264895
ENSMUSG00000076441	307	306	299	544	487	482	332	301	300	519	456	495	400.57	311	490	1575	655	6461	10435.1	129466	0	0.0055	0.0048	0.0048	TRUE	0.0437	argininosuccinate synthetase 1 [Source:MGI Symbol;Acc:MGI:88090]	2	31470207	31520672	1	Ass1	11898
ENSMUSG00000078190	57	63	60	279	277	267	62	62	60	266	259	274	163.91	61	266	4345	2119	13017	9.77657e-25	5.60425e-23	0	0.0115	0.0089	0.0089	TRUE	0.0066	dynamin 3, opposite strand [Source:MGI Symbol;Acc:MGI:3052332]	1	162217623	162225550	1	Dnm3os	NA
ENSMUSG00000078247	11	10	18	196	200	162	12	10	18	187	187	166	96.72	13	180	13569	3762	13346	1.25812e-26	7.64297e-25	0	0.0186	0.0161	0.0161	TRUE	0.4341	antisense Igf2r RNA [Source:MGI Symbol;Acc:MGI:1353471]	17	12741311	12860136	1	Airn	NA
ENSMUSG00000078302	3	1	3	20	29	19	3	1	3	19	27	19	12.16	2	22	9174	3197	4.57	4.87377e+08	3.30437e+09	0	0.1378	0.1168	0.1168	TRUE	0.3045	forkhead box D1 [Source:MGI Symbol;Acc:MGI:1347463]	13	98354242	98359305	1	Foxd1	15229
ENSMUSG00000078453	246	241	245	450	447	521	266	237	246	429	418	535	355.34	250	461	1844	883	7556	4.17143	0.712274	0.0092	0.0061	0.0067	0.0067	TRUE	0.2252	ABRA C-terminal like [Source:MGI Symbol;Acc:MGI:1920362]	10	18011260	18023288	-1	Abracl	73112
ENSMUSG00000078794	35	38	62	146	146	101	38	37	62	139	137	104	86.2	46	127	2759	1464	6389	16686.1	203870	0.0364	0.0207	0.0229	0.0229	TRUE	0.7802	dishevelled-binding antagonist of beta-catenin 3 [Source:MGI Symbol;Acc:MGI:3654828]	7	16875317	16887462	1	Dact3	629378
ENSMUSG00000079111	860	923	922	1606	1598	1385	931	909	926	1532	1496	1421	1202.51	922	1483	1.61	687	10553	4.92339e-12	1.73777e-10	0	0.0028	0.0022	0.0022	TRUE	0.0159	KDEL (Lys-Asp-Glu-Leu) endoplasmic reticulum protein retention receptor 2 [Source:MGI Symbol;Acc:MGI:1914163]	5	143403838	143421901	1	Kdelr2	66913
ENSMUSG00000079658	418	484	474	798	777	723	452	477	476	761	727	742	605.95	468	743	1587	666	8097	0.0561912	1.12147	0	0.0041	0.0031	0.0031	TRUE	0.01	elongin C [Source:MGI Symbol;Acc:MGI:1915173]	1	16641725	16657042	-1	Eloc	67923
ENSMUSG00000080717	123	135	173	264	247	246	133	133	174	252	231	252	195.89	147	245	1671	741	5181	2.20658e+07	1.83257e+08	0.0059	0.0099	0.0093	0.0093	TRUE	0.2754	RIKEN cDNA B230307C23 gene [Source:MGI Symbol;Acc:MGI:3643396]	16	97997315	98031801	1	B230307C23Rik	245305
ENSMUSG00000082908	47	60	46	103	103	112	51	59	46	98	96	115	77.63	52	103	1979	985	4571	4.85385e+08	3.29379e+09	0	0.0228	0.0189	0.0189	TRUE	0.1197	predicted gene 13736 [Source:MGI Symbol;Acc:MGI:3650137]	2	87526145	87526397	1	Gm13736	NA
ENSMUSG00000083307	0	0	0	17	25	30	0	0	0	16	23	31	11.73	0	23	124514	6.96	5.5	3.79372e+06	3.48264e+07	0.0616	0.1428	0.1333	0.1333	TRUE	0.0634	expressed sequence AA414768 [Source:MGI Symbol;Acc:MGI:3035137]	X	12936872	12938128	1	AA414768	245350
ENSMUSG00000084885	0	1	0	7	9	9	0	1	0	7	8	9	4.22	0	8	22121	4467	3218	0.00128941196719161	0.00541474901562592	0	0.3945	0.3287	0.3287	TRUE	0.3915	RIKEN cDNA 3010001F23 gene [Source:MGI Symbol;Acc:MGI:1922943]	X	152368573	152416698	1	3010001F23Rik	NA
ENSMUSG00000085162	1	2	1	27	35	20	1	2	1	26	33	21	13.85	1	27	19.39	4277	5142	2.71954e+07	2.23741e+08	0	0.1212	0.1048	0.1048	TRUE	0.0871	predicted gene 12295 [Source:MGI Symbol;Acc:MGI:3650535]	11	65277654	65365798	-1	Gm12295	NA
ENSMUSG00000085456	1	2	3	59	59	58	1	2	3	56	55	60	29.52	2	57	27.91	4803	7368	17.2856	282.498	0	0.0576	0.0474	0.0474	TRUE	0.1644	predicted gene 15398 [Source:MGI Symbol;Acc:MGI:3705254]	10	73201399	73327175	-1	Gm15398	NA
ENSMUSG00000085596	12	14	24	58	54	37	13	14	24	55	51	38	32.46	17	48	2825	1498	4256	2.08047e+09	0.000125934758890742	0.0276	0.0525	0.0491	0.0491	TRUE	673	predicted gene 11476 [Source:MGI Symbol;Acc:MGI:3705135]	2	167553314	167607845	1	Gm11476	NA
ENSMUSG00000085666	144	193	114	258	261	268	156	190	114	246	244	275	204.32	153	255	1661	732	4.71	2.47495e+08	1.76099e+09	0.0261	0.0095	0.0122	0.0122	TRUE	0.4179	thymine DNA glycosylase, pseudogene 2 [Source:MGI Symbol;Acc:MGI:3704357]	10	42054113	42055306	-1	Tdg-ps2	NA
ENSMUSG00000085675	49	57	77	101	123	93	53	56	77	96	115	95	82.24	62	102	1645	718	3358	0.000785310382020732	0.0034768910293415	0.0113	0.0216	0.02	0.02	TRUE	0.3979	predicted gene 12022 [Source:MGI Symbol;Acc:MGI:3650976]	11	18467479	18493255	-1	Gm12022	NA
ENSMUSG00000085766	9	7	9	35	31	24	10	7	9	33	29	25	18.79	9	29	3405	1768	3.89	0.000100298630347459	0.000537936516193475	0	0.0897	0.0721	0.0721	TRUE	0.0941	RIKEN cDNA 2810430I11 gene [Source:MGI Symbol;Acc:MGI:3590515]	2	27882925	27887052	-1	2810430I11Rik	NA
ENSMUSG00000085795	291	323	299	709	717	599	315	318	300	677	671	615	482.61	311	654	2104	1073	11456	2.19874e-16	9.41753e-15	0	0.0048	0.0039	0.0039	TRUE	0.0324	zinc finger protein 703 [Source:MGI Symbol;Acc:MGI:2662729]	8	26977325	26981461	1	Zfp703	353310
ENSMUSG00000085936	4	8	7	23	21	20	4	8	7	22	20	21	13.56	6	21	3211	1683	3191	0.00141725623556921	0.00588356196023942	0	0.1238	0.0977	0.0977	TRUE	0.1819	RIKEN cDNA 2610307P16 gene [Source:MGI Symbol;Acc:MGI:1919768]	13	28460034	28885620	-1	2610307P16Rik	NA
ENSMUSG00000086020	30	25	54	69	75	71	32	25	54	66	70	73	53.37	37	70	1875	907	3268	0.00108301878889701	0.00462443867070892	0.0494	0.0325	0.0348	0.0348	TRUE	12064	predicted gene 12239 [Source:MGI Symbol;Acc:MGI:3651547]	11	55772088	56070848	1	Gm12239	NA
ENSMUSG00000086522	3	3	4	19	21	15	3	3	4	18	20	15	10.57	3	18	5.21	2381	3677	0.000236407705465694	0.00117609941042118	0	0.1584	0.1249	0.1249	TRUE	0.0653	predicted gene 4473 [Source:MGI Symbol;Acc:MGI:3782657]	10	120899157	120901888	1	Gm4473	NA
ENSMUSG00000087006	12	7	5	127	129	128	13	7	5	121	121	131	66.36	8	124	15178	3924	11163	6.21813e-15	2.51496e-13	0	0.0264	0.0228	0.0228	TRUE	0.6778	predicted gene 13889 [Source:MGI Symbol;Acc:MGI:3652053]	2	93955810	93957201	-1	Gm13889	620695
ENSMUSG00000087022	16	12	24	42	42	36	17	12	24	40	39	37	28.26	18	39	2188	1.13	3143	0.00167001839327005	0.00678328195540271	0	0.0601	0.0517	0.0517	TRUE	0.5008	RIKEN cDNA 9130024F11 gene [Source:MGI Symbol;Acc:MGI:1926150]	1	56971412	57050084	1	9130024F11Rik	NA
ENSMUSG00000087203	5	15	13	78	68	37	5	15	13	74	64	38	34.88	11	59	5.26	2395	6121	93029.5	1.03997e+06	104	49	0.0563	0.0563	TRUE	0.3544	predicted gene 13986 [Source:MGI Symbol;Acc:MGI:3651937]	2	117857291	118111202	-1	Gm13986	NA
ENSMUSG00000087247	2	2	6	28	27	31	2	2	6	27	25	32	15.66	3	28	8202	3036	5059	4.20999e+07	3.36446e+08	0	0.1073	0.0918	0.0918	TRUE	0.6833	ALK and LTK ligand 1 [Source:MGI Symbol;Acc:MGI:3645495]	1	6359218	6394731	1	Alkal1	620393
ENSMUSG00000089945	97	104	97	167	189	153	105	102	97	159	177	157	133.01	101	164	1.62	696	4299	1.71781e+09	0.000105703108235262	0	0.0139	0.0109	0.0109	TRUE	48	paralemmin A kinase anchor protein [Source:MGI Symbol;Acc:MGI:5141924]	4	57568179	57896982	1	Pakap	677884
ENSMUSG00000090066	14	6	9	86	97	69	15	6	9	82	91	71	45.63	10	81	8198	3035	8491	0.000204034	0.0456174	0.0057	0.0378	0.0346	0.0346	TRUE	0.5923	RIKEN cDNA 1110002E22 gene [Source:MGI Symbol;Acc:MGI:1915066]	3	138065052	138081506	1	1110002E22Rik	102634333
ENSMUSG00000090799	30	37	36	98	95	73	32	36	36	94	89	75	60.4	35	86	2.45	1293	5253	1.49756e+07	1.27998e+08	0	0.0289	0.0234	0.0234	TRUE	0.1137	kelch-like 33 [Source:MGI Symbol;Acc:MGI:3644593]	14	50888582	50897507	-1	Klhl33	546611
ENSMUSG00000090841	1278	1419	1275	2991	2833	2814	1383	1398	1280	2854	2652	2887	2075.72	1354	2798	2067	1047	17357	1.74445e-53	2.35392e-51	0.0017	0.0022	0.0021	0.0021	TRUE	0.0273	myosin, light polypeptide 6, alkali, smooth muscle and non-muscle [Source:MGI Symbol;Acc:MGI:109318]	10	128490860	128494145	-1	Myl6	17904
ENSMUSG00000090863	1	0	1	13	10	12	1	0	1	12	9	12	6.03	1	11	16613	4054	3411	0.000647780102801329	0.00291453260770571	0	0.2767	0.2273	0.2273	TRUE	0.2702	RIKEN cDNA A530084C06 gene [Source:MGI Symbol;Acc:MGI:3704402]	13	31556134	31559333	-1	A530084C06Rik	NA
ENSMUSG00000090958	86	85	96	166	173	134	93	84	96	158	162	137	121.84	91	152	1678	747	4366	1.26388e+08	7.94051e+09	0	15	0.0123	0.0123	TRUE	0.0772	leucine rich repeat containing 32 [Source:MGI Symbol;Acc:MGI:93882]	7	98489283	98502181	1	Lrrc32	434215
ENSMUSG00000091028	1	3	3	11	19	26	1	3	3	10	18	27	10.34	2	18	7689	2943	3971	7.15817e+09	0.000392617700514126	0	0.1619	154	154	TRUE	0.0793	predicted gene 10722 [Source:MGI Symbol;Acc:MGI:3642024]	9	3000922	3002330	1	Gm10722	NA
ENSMUSG00000091243	931	972	962	2013	2177	1951	1008	957	966	1921	2038	2002	1481.91	977	1987	2035	1025	16619	5.07904e-48	6.05041e-46	0	0.0025	2	2	TRUE	0.0103	vestigial like family member 3 [Source:MGI Symbol;Acc:MGI:1920819]	16	65815257	65866368	1	Vgll3	73569
ENSMUSG00000091993	19	14	22	51	50	34	21	14	22	49	47	35	31.13	19	44	2319	1213	3519	0.000433619321088409	0.0020324985083114	0	0.0547	0.0473	0.0473	TRUE	0.2977	RIKEN cDNA B930036N10 gene [Source:MGI Symbol;Acc:MGI:3702496]	1	171500568	171504111	-1	B930036N10Rik	NA
ENSMUSG00000092060	39	50	33	102	104	98	42	49	33	97	97	101	69.97	41	98	2368	1244	5408	6.36995e+06	5.70676e+06	0	0.0251	0.0209	0.0209	TRUE	0.2446	BEN domain containing 4 [Source:MGI Symbol;Acc:MGI:3648414]	5	67392147	67428310	-1	Bend4	666938
ENSMUSG00000093930	1601	1718	1612	2556	2740	2580	1733	1692	1618	2439	2565	2647	2115.75	1681	2550	1517	601	10469	1.204e-11	4.09789e-11	1	0.0022	0.0019	0.0019	TRUE	0.0177	3-hydroxy-3-methylglutaryl-Coenzyme A synthase 1 [Source:MGI Symbol;Acc:MGI:107592]	13	119690379	119708260	1	Hmgcs1	208715
ENSMUSG00000094050	5	9	6	8	86	101	5	9	6	8	81	104	35.35	7	64	9432	3238	3207	0.00134152200866476	0.00561656441189463	0.6514	0.0483	0.1615	0.6514	TRUE	0.3383	predicted gene, 23472 [Source:MGI Symbol;Acc:MGI:5453249]	1	72236946	72237136	1	Gm23472	NA
ENSMUSG00000095105	6	4	5	18	15	26	6	4	5	17	14	27	12.22	5	19	3753	1908	3.28	0.00103893751150234	0.00446623038494153	0	0.1371	0.1189	0.1189	TRUE	0.5145	EDAR (ectodysplasin-A receptor)-associated death domain [Source:MGI Symbol;Acc:MGI:1931001]	13	12472632	12520438	-1	Edaradd	171211
ENSMUSG00000095280	3	5	10	63	82	67	3	5	10	60	77	69	37.31	6	69	11201	3486	8151	0.0360243	0.735339	0.0031	0.0459	0.0412	0.0412	TRUE	0.6843	predicted gene, 21738 [Source:MGI Symbol;Acc:MGI:5433902]	14	19415857	19418930	-1	Gm21738	NA
ENSMUSG00000095315	62	87	103	132	130	143	67	86	103	126	122	147	108.43	85	132	1534	618	3245	0.00117463999926291	0.00496973105126551	0.0149	0.0167	0.0164	0.0164	TRUE	0.2894	predicted gene 10130 [Source:MGI Symbol;Acc:MGI:3642547]	2	150311431	150363071	1	Gm10130	102633750
ENSMUSG00000095742	5	7	5	122	117	131	5	7	5	116	110	134	62.95	6	120	20.73	4374	10.89	1.29333e-13	4.94251e-12	0	0.0278	0.0239	0.0239	TRUE	0.1082		JH584295.1	66	1479	-1	CAAA01147332.1	NA
ENSMUSG00000096210	436	485	448	882	805	856	472	478	450	842	754	878	645.48	467	825	1767	821	9519	1.74081e-07	4.84377e-07	0.0026	4	0.0037	0.0037	TRUE	0.0679	H1.0 linker histone [Source:MGI Symbol;Acc:MGI:95893]	15	79028450	79030504	1	H1f0	14958
ENSMUSG00000096965	56	54	69	116	133	113	61	53	69	111	125	116	89.04	61	117	1919	0.94	4693	2.69549e+08	1.90017e+09	0	0.02	0.0164	0.0164	TRUE	0.1245	RIKEN cDNA 3300005D01 gene [Source:MGI Symbol;Acc:MGI:1925762]	17	5798657	5803240	1	3300005D01Rik	NA
ENSMUSG00000097028	21	25	28	53	65	44	23	25	28	51	61	45	38.67	25	52	2075	1053	3483	0.000495947249917027	0.00229366201599479	0	0.0443	0.0363	0.0363	TRUE	179	prostaglandin-endoperoxide synthase 2, opposite strand [Source:MGI Symbol;Acc:MGI:2443180]	1	150074873	150099963	-1	Ptgs2os	NA
ENSMUSG00000097180	61	57	76	108	97	113	66	56	76	103	91	116	84.71	66	103	1.56	641	3089	0.00200908366692811	0.00800274497213161	0.0064	21	0.0186	0.0186	TRUE	0.1637	RIKEN cDNA 2700038G22 gene [Source:MGI Symbol;Acc:MGI:1914444]	5	23850597	23855038	1	2700038G22Rik	NA
ENSMUSG00000097183	54	59	53	202	215	183	58	58	53	193	201	188	125.26	56	194	3.43	1778	9961	2.2547e-09	6.95944e-08	0	0.0147	0.0114	0.0114	TRUE	0.0233	predicted gene, 17501 [Source:MGI Symbol;Acc:MGI:4937135]	3	145650312	145677580	1	Gm17501	NA
ENSMUSG00000097287	19	28	14	47	51	37	21	28	14	45	48	38	32.13	21	44	2099	1.07	3155	0.00160333484387662	0.00655257295615939	0.0059	0.0531	0.0471	0.0471	TRUE	0.4205	RIKEN cDNA D130017N08 gene [Source:MGI Symbol;Acc:MGI:2443273]	5	143758354	143768575	1	D130017N08Rik	NA
ENSMUSG00000097324	143	197	223	382	450	365	155	194	224	365	421	375	288.83	191	387	2023	1016	7843	0.440063	8.26365	0.0137	0.0072	0.0082	0.0082	TRUE	0.2858	cardiac mesoderm enhancer-associated non-coding RNA [Source:MGI Symbol;Acc:MGI:4439832]	18	61649625	61665537	-1	Carmn	NA
ENSMUSG00000097354	78	81	91	177	185	148	84	80	91	169	173	152	124.92	85	165	1934	952	5614	1.9747e+06	1.87954e+07	0	0.0147	0.0118	0.0118	TRUE	48	RIKEN cDNA 2310001H17 gene [Source:MGI Symbol;Acc:MGI:1923682]	6	129208412	129238725	-1	2310001H17Rik	NA
ENSMUSG00000097418	49	39	47	81	94	78	53	38	47	77	88	80	63.99	46	82	1774	827	3534	0.000409480500117388	0.00193484929215678	0	0.0273	0.0225	0.0225	TRUE	0.1766	Mir155 host gene (non-protein coding) [Source:MGI Symbol;Acc:MGI:5477161]	16	84703167	84715245	1	Mir155hg	NA
ENSMUSG00000097462	3	2	4	12	21	14	3	2	4	11	20	14	9.12	3	15	4943	2305	3302	0.000960622271197131	0.00415533855069897	0	0.1834	0.1527	0.1527	TRUE	0.2088	RIKEN cDNA 9530026P05 gene [Source:MGI Symbol;Acc:MGI:1924659]	6	92940329	93272979	1	9530026P05Rik	NA
ENSMUSG00000097709	34	40	32	88	91	62	37	39	32	84	85	64	56.85	36	78	2152	1106	4351	1.35474e+09	8.47367e+09	0	0.0306	0.0261	0.0261	TRUE	0.2239	RIKEN cDNA 2810429I04 gene [Source:MGI Symbol;Acc:MGI:1924187]	13	3478230	3501393	1	2810429I04Rik	NA
ENSMUSG00000100779	22	16	15	56	52	41	24	16	15	53	49	42	33.14	18	48	2655	1409	4183	2.87621e+09	0.000170647678527312	0	0.0515	0.0434	0.0434	TRUE	0.3477	predicted gene 29292 [Source:MGI Symbol;Acc:MGI:5579998]	11	116529215	116533077	-1	Gm29292	NA
ENSMUSG00000100782	3	1	5	18	10	16	3	1	5	17	9	16	8.7	3	14	4653	2218	3086	0.00202608235558988	0.00805362454589013	0	0.1921	0.1718	0.1718	TRUE	0.5046	predicted gene 28231 [Source:MGI Symbol;Acc:MGI:5578937]	9	88259895	88263035	1	Gm28231	NA
ENSMUSG00000101609	208	257	355	655	794	651	225	253	356	625	743	668	478.49	278	679	2439	1286	6168	69200.7	786855	0.0288	0.0049	0.0089	0.0288	TRUE	0.6794	KCNQ1 overlapping transcript 1 [Source:MGI Symbol;Acc:MGI:1926855]	7	143203458	143296549	-1	Kcnq1ot1	NA
ENSMUSG00000102684	0	0	0	7	11	6	0	0	0	7	10	6	3.86	0	8	41057	5.36	3788	0.000151800210452317	0.000789713274983601	0	0.4317	0.3797	0.3797	TRUE	0.2629	predicted gene, 37374 [Source:MGI Symbol;Acc:MGI:5610602]	9	87738192	87740020	-1	Gm37374	NA
ENSMUSG00000104045	0	0	0	11	10	11	0	0	0	10	9	11	5.19	0	10	55.14	5785	4274	1.91806e+08	0.000116799278989767	0	321	0.2734	0.2734	TRUE	0.0711	predicted gene, 37565 [Source:MGI Symbol;Acc:MGI:5610793]	2	12697417	12706853	1	Gm37565	NA
ENSMUSG00000105987	1191	1380	1286	2440	2682	2270	1289	1359	1291	2328	2511	2329	1851.25	1313	2389	1.82	864	14495	1.30708e-34	1.04769e-31	1	0.0023	2	2	TRUE	0.0241	expressed sequence AI506816 [Source:MGI Symbol;Acc:MGI:2140929]	5	23698296	23712667	-1	AI506816	NA
ENSMUSG00000107352	3	2	2	18	29	19	3	2	2	17	27	19	11.84	2	21	8911	3156	4489	7.16929e+08	4.71602e+09	0	0.1415	0.1195	0.1195	TRUE	0.3443	predicted gene 43660 [Source:MGI Symbol;Acc:MGI:5663797]	5	31560812	31569072	-1	Gm43660	NA
ENSMUSG00000107355	10	11	16	34	35	34	11	11	16	32	33	35	22.97	13	33	2649	1405	3539	0.000402275302621201	0.00190611989259418	0	0.0736	0.0585	0.0585	TRUE	0.2432	expressed sequence AI839979 [Source:MGI Symbol;Acc:MGI:2140975]	5	31569595	31571397	-1	AI839979	NA
ENSMUSG00000108381	17	13	15	33	37	37	18	13	15	31	35	38	25.06	15	35	2256	1174	3137	0.00170970848172426	0.0069352580285532	0	0.0676	0.0536	0.0536	TRUE	0.1239	predicted gene 9299 [Source:MGI Symbol;Acc:MGI:3648098]	7	128041251	128042390	-1	Gm9299	NA
ENSMUSG00000109394	76	61	100	152	171	140	82	60	100	145	160	144	115.25	81	150	1851	889	4694	2.67893e+07	1.892e+09	0.0187	0.0158	0.0162	0.0162	TRUE	0.4729	RIKEN cDNA A230057D06 gene [Source:MGI Symbol;Acc:MGI:2442922]	7	61704519	61928690	-1	A230057D06Rik	NA
ENSMUSG00000111080	83	80	67	126	119	120	90	79	67	120	111	123	98.44	79	118	1506	0.59	3118	0.00182341648007789	0.00734569471287389	0	0.0183	0.0152	0.0152	TRUE	148	predicted gene, 20300 [Source:MGI Symbol;Acc:MGI:5012485]	10	30603195	30606634	-1	Gm20300	NA
ENSMUSG00000113157	1	1	5	20	27	17	1	1	5	19	25	17	11.48	2	20	8669	3116	4353	1.34097e+09	8.40061e+09	0	0.1459	0.1308	0.1308	TRUE	10276	predicted gene, 48693 [Source:MGI Symbol;Acc:MGI:6098323]	12	20615014	20664803	1	Gm48693	NA
ENSMUSG00000115354	24	28	26	65	76	66	26	28	26	62	71	68	46.76	27	67	2521	1334	4824	1.40586e+08	1.03408e+09	0	0.0369	0.0286	0.0286	TRUE	0.0381	predicted gene, 49083 [Source:MGI Symbol;Acc:MGI:6118469]	14	43804696	43812383	-1	Gm49083	115488290
ENSMUSG00000116307	8	4	2	22	29	27	9	4	2	21	27	28	15.08	5	25	5264	2396	4282	1.85126e+09	0.000113138335082139	0	0.1115	0.0999	0.0999	TRUE	0.8449	predicted gene, 49490 [Source:MGI Symbol;Acc:MGI:6155166]	15	78531109	78532797	1	Gm49490	NA
ENSMUSG00000117098	175	181	173	250	294	291	189	178	174	239	275	299	225.62	180	271	1.5	585	4445	8.80646e+08	5.69711e+09	0.0041	0.0088	0.0079	0.0079	TRUE	0.1221	predicted gene, 49909 [Source:MGI Symbol;Acc:MGI:6270609]	17	70974119	71002208	-1	Gm49909	NA
ENSMUSG00000117183	42	35	41	93	107	78	45	34	41	89	100	80	65.01	40	90	2228	1156	4866	1.13773e+08	8.51646e+07	0	0.0269	0.0226	0.0226	TRUE	0.1258	predicted gene, 20008 [Source:MGI Symbol;Acc:MGI:5012193]	17	22713782	22716937	-1	Gm20008	NA
ENSMUSG00000117465	12	8	15	38	31	43	13	8	15	36	29	44	24.22	12	36	3047	1607	3974	7.07916e+08	0.000388983940227441	0	0.0699	0.0618	0.0618	TRUE	0.2032	predicted gene, 49980 [Source:MGI Symbol;Acc:MGI:6275257]	18	30267249	30272133	1	Gm49980	NA
ENSMUSG00000118365	63	62	91	132	166	141	68	61	91	126	155	145	107.77	73	142	1931	949	4919	8.70703e+07	6.64821e+08	0.0145	0.0168	0.0165	0.0165	TRUE	0.4164	predicted gene, 41724 [Source:MGI Symbol;Acc:MGI:5624609]	18	52528661	52577325	1	Gm41724	NA
ENSMUSG00000118383	27	28	18	120	119	79	29	28	18	115	111	81	63.64	25	102	4115	2041	7587	3.27407	56.3465	0.0234	0.0275	0.0269	0.0269	TRUE	0.3592	predicted gene, 50321 [Source:MGI Symbol;Acc:MGI:6303181]	19	9828899	9836897	-1	Gm50321	NA

## Sheet: M-DOWN
Ensembl.Gene.ID	GFP1	GFP2	GFP3	M1	M2	M3	norm.GFP1	norm.GFP2	norm.GFP3	norm.M1	norm.M2	norm.M3	baseMean	GFP	M	FoldChange	log2FoldChange	stat	pvalue	padj	dispGeneEst	dispFit	dispMAP	dispersion	betaConv	maxCooks	Gene.description	Chromosome.scaffold.name	Gene.start..bp.	Gene.end..bp.	Strand	Gene.name	EntrezID
ENSMUSG00000000037	65	64	94	11	30	24	62	55	83	19	25	21	44.38	67	22	337	-1569	-5119	3.07372e+06	2.68862e+08	0	0.0407	0.0367	0.0367	TRUE	0.4141	Scm polycomb group protein like 2 [Source:MGI Symbol;Acc:MGI:1340042]	X	161082525	161258213	1	Scml2	107815
ENSMUSG00000000056	477	476	459	83	208	204	454	412	404	147	176	183	295.84	423	169	404	-1308	-10685	1.2029e-12	5.18315e-11	0.0023	0.0074	0.0065	0.0065	TRUE	0.0932	nuclear prelamin A recognition factor [Source:MGI Symbol;Acc:MGI:1914858]	11	121237253	121255856	1	Narf	67608
ENSMUSG00000000126	34	54	42	7	19	13	32	47	37	12	16	12	26.02	39	13	349	-1519	-3904	9.47632e+09	0.000537224984918659	0	0.0683	0.0572	0.0572	TRUE	0.2603	wingless-type MMTV integration site family, member 9A [Source:MGI Symbol;Acc:MGI:2446084]	11	59306928	59333552	1	Wnt9a	216795
ENSMUSG00000000154	6	10	10	0	0	1	6	9	9	0	0	1	4.01	8	0	51	-4292	-3056	0.00224606664048493	0.00899909616286725	0	0.4351	364	364	TRUE	0.2613	solute carrier family 22 (organic cation transporter), member 18 [Source:MGI Symbol;Acc:MGI:1336884]	7	143473736	143499334	1	Slc22a18	18400
ENSMUSG00000000290	82	104	115	15	38	25	78	90	101	26	32	22	58.38	90	27	302	-1727	-6411	14448.6	195567	0	0.0313	0.0272	0.0272	TRUE	0.1921	integrin beta 2 [Source:MGI Symbol;Acc:MGI:96611]	10	77530252	77565708	1	Itgb2	16414
ENSMUSG00000000325	33	46	39	9	12	19	31	40	34	16	10	17	24.77	35	14	401	-1319	-3361	0.000776008199445961	0.00352960131690536	0	0.0717	0.0595	0.0595	TRUE	0.3945	armadillo repeat gene deleted in velocardiofacial syndrome [Source:MGI Symbol;Acc:MGI:109620]	16	18348182	18407076	1	Arvcf	11877
ENSMUSG00000000567	302	350	323	26	77	64	287	303	284	46	65	57	173.82	291	56	198	-2337	-13857	1.15933e-29	1.01105e-27	0	0.0115	0.0096	0.0096	TRUE	0.1596	SRY (sex determining region Y)-box 9 [Source:MGI Symbol;Acc:MGI:98371]	11	112782224	112787760	1	Sox9	20682
ENSMUSG00000000693	168	189	207	28	68	76	160	164	182	49	58	68	113.44	169	58	353	-1504	-7907	0.0264349	5.65342	0	0.0168	0.0142	0.0142	TRUE	179	lysyl oxidase-like 3 [Source:MGI Symbol;Acc:MGI:1337004]	6	83034173	83052562	1	Loxl3	16950
ENSMUSG00000000782	351	386	354	105	159	151	334	334	312	185	135	135	239.13	327	152	453	-1141	-8319	0.00883389	0.210913	0.0062	0.0088	0.0085	0.0085	TRUE	0.2924	transcription factor 7, T cell specific [Source:MGI Symbol;Acc:MGI:98507]	11	52252371	52283331	-1	Tcf7	21414
ENSMUSG00000000901	646	762	700	139	307	297	615	659	616	245	260	266	443.57	630	257	0.41	-1286	-12945	2.51438e-24	1.80391e-22	0	0.0054	0.0043	0.0043	TRUE	0.0195	matrix metallopeptidase 11 [Source:MGI Symbol;Acc:MGI:97008]	10	75923222	75936496	-1	Mmp11	17385
ENSMUSG00000001036	658	747	698	137	306	303	626	646	614	242	259	271	443.18	629	257	412	-1279	-12911	3.924e-24	2.77423e-22	0	0.0054	0.0042	0.0042	TRUE	0.0234	epsin 2 [Source:MGI Symbol;Acc:MGI:1333766]	11	61517249	61579687	-1	Epn2	13855
ENSMUSG00000001281	347	380	318	19	50	52	330	329	280	34	42	47	176.89	313	41	134	-2.9	-15715	1.18497e-41	1.7087e-39	0	0.0113	0.0103	0.0103	TRUE	0.0982	integrin beta 7 [Source:MGI Symbol;Acc:MGI:96616]	15	102215995	102231944	-1	Itgb7	16421
ENSMUSG00000001288	1721	1859	1733	353	814	769	1638	1608	1526	623	689	689	1128.73	1591	667	422	-1245	-17423	5.54541e-54	1.20542e-51	0.0007	3	0.0026	0.0026	TRUE	0.03	retinoic acid receptor, gamma [Source:MGI Symbol;Acc:MGI:97858]	15	102234938	102257517	-1	Rarg	19411
ENSMUSG00000001663	22	31	29	3	7	3	21	27	26	5	6	3	14.53	25	5	186	-2424	-4238	2.25872e+09	0.000146396306277025	0	0.1212	0.0994	0.0994	TRUE	0.3476	glutathione S-transferase, theta 1 [Source:MGI Symbol;Acc:MGI:107379]	10	75783813	75798584	-1	Gstt1	14871
ENSMUSG00000001741	10	13	16	0	2	2	10	11	14	0	2	2	6.39	12	1	117	-3.1	-3251	0.0011483767812959	0.00498508478175661	0	0.2737	0.2228	0.2228	TRUE	146	interleukin 16 [Source:MGI Symbol;Acc:MGI:1270855]	7	83642825	83745726	-1	Il16	16170
ENSMUSG00000002006	55	62	43	7	14	19	52	54	38	12	12	17	30.84	48	14	0.29	-1786	-4833	1.34488e+08	1.06798e+09	0	0.0579	0.0499	0.0499	TRUE	0.2868	PDZ domain containing 4 [Source:MGI Symbol;Acc:MGI:2443483]	X	73793359	73824969	-1	Pdzd4	245469
ENSMUSG00000002020	101	99	100	6	8	11	96	86	88	11	7	10	49.5	90	9	98	-3355	-9.21	3.27647e-06	9.90011e-05	0	0.0366	0.03	0.03	TRUE	0.2136	latent transforming growth factor beta binding protein 2 [Source:MGI Symbol;Acc:MGI:99502]	12	84783212	84876532	-1	Ltbp2	16997
ENSMUSG00000002109	34	38	41	8	19	13	32	33	36	14	16	12	23.86	34	14	413	-1276	-3.26	0.0011133463918059	0.00485327053285279	0	0.0744	58	58	TRUE	0.1235	damage specific DNA binding protein 2 [Source:MGI Symbol;Acc:MGI:1355314]	2	91211572	91236982	-1	Ddb2	107986
ENSMUSG00000002249	152	155	154	34	82	54	145	134	136	60	69	48	98.68	138	59	429	-1.22	-6083	11823.8	1.43981e+06	0	0.0191	0.0165	0.0165	TRUE	0.2851	TEA domain family member 3 [Source:MGI Symbol;Acc:MGI:109241]	17	28331671	28350817	-1	Tead3	21678
ENSMUSG00000002329	49	46	49	8	21	18	47	40	43	14	18	16	29.6	43	16	377	-1408	-3967	7.27423e+09	0.000423259600737461	0	0.0603	0.0469	0.0469	TRUE	0.0468	magnesium-dependent phosphatase 1 [Source:MGI Symbol;Acc:MGI:1915131]	14	55657879	55660508	-1	Mdp1	67881
ENSMUSG00000002396	47	53	50	12	26	24	45	46	44	21	22	21	33.21	45	21	482	-1054	-3245	0.00117442827819534	0.00507698825872275	0	0.0539	0.0407	0.0407	TRUE	0.0031	occludin/ELL domain containing 1 [Source:MGI Symbol;Acc:MGI:1924340]	8	71371298	71379361	1	Ocel1	77090
ENSMUSG00000002803	47	45	59	13	17	14	45	39	52	23	14	13	30.91	45	17	0.35	-1516	-4192	2.7609e+08	0.000175820820941116	0.0046	0.0578	0.0498	0.0498	TRUE	291	BTB (POZ) domain containing 6 [Source:MGI Symbol;Acc:MGI:3026623]	12	112976482	112978945	1	Btbd6	399566
ENSMUSG00000002820	178	159	170	37	110	74	169	138	150	65	93	66	113.55	152	75	0.5	-999	-5198	2.01183e+07	1.80977e+08	0.0144	0.0168	0.0164	0.0164	TRUE	0.4674	autophagy related 4D, cysteine peptidase [Source:MGI Symbol;Acc:MGI:2444308]	9	21265293	21277772	1	Atg4d	235040
ENSMUSG00000002831	268	289	322	52	100	94	255	250	283	92	85	84	174.86	263	87	328	-1608	-10379	3.10274e-11	1.24144e-09	0	0.0114	0.0093	0.0093	TRUE	0.0536	perilipin 4 [Source:MGI Symbol;Acc:MGI:1929709]	17	56100591	56109803	-1	Plin4	57435
ENSMUSG00000002885	222	250	250	40	72	75	211	216	220	71	61	67	141.06	216	66	304	-1719	-10041	1.00702e-09	3.70359e-08	0	0.0138	0.0107	0.0107	TRUE	0.0491	adhesion G protein-coupled receptor E5 [Source:MGI Symbol;Acc:MGI:1347095]	8	83723251	83741326	-1	Adgre5	26364
ENSMUSG00000003032	1870	2154	1878	281	687	633	1780	1863	1653	496	581	567	1156.77	1765	548	313	-1675	-21.55	5.30499e-91	2.34127e-86	0.0034	3	0.0031	0.0031	TRUE	62	Kruppel-like factor 4 (gut) [Source:MGI Symbol;Acc:MGI:1342287]	4	55527143	55532466	-1	Klf4	16600
ENSMUSG00000003411	26	31	33	2	3	5	25	27	29	4	3	4	15.19	27	4	0.13	-2942	-4876	1.08088e+08	8.71646e+08	0	116	0.0928	0.0928	TRUE	0.1457	RAB3B, member RAS oncogene family [Source:MGI Symbol;Acc:MGI:1917158]	4	108879063	108943324	1	Rab3b	69908
ENSMUSG00000003420	113	120	106	14	46	40	108	104	93	25	39	36	67.35	102	33	338	-1566	-6396	15952.2	215118	0	0.0273	0.0229	0.0229	TRUE	0.1826	Fc receptor, IgG, alpha chain transporter [Source:MGI Symbol;Acc:MGI:103017]	7	45092990	45103851	-1	Fcgrt	14132
ENSMUSG00000003849	412	445	395	71	157	154	392	385	348	125	133	138	253.49	375	132	354	-1496	-11518	1.06534e-16	5.52159e-15	0	0.0084	0.0068	0.0068	TRUE	0.0468	NAD(P)H dehydrogenase, quinone 1 [Source:MGI Symbol;Acc:MGI:103187]	8	107388225	107403206	-1	Nqo1	18104
ENSMUSG00000004113	31	54	52	0	0	0	30	47	46	0	0	0	20.33	41	0	5	-7651	-6215	5129.83	657666	0.0393	87	0.0811	0.0811	TRUE	0.4388	calcium channel, voltage-dependent, N type, alpha 1B subunit [Source:MGI Symbol;Acc:MGI:88296]	2	24603887	24763152	-1	Cacna1b	12287
ENSMUSG00000004151	104	115	120	13	37	33	99	99	106	23	31	30	64.65	101	28	283	-1823	-7231	48.0634	839.324	0	0.0284	0.0225	0.0225	TRUE	0.0802	ets variant 1 [Source:MGI Symbol;Acc:MGI:99254]	12	38779380	38870484	1	Etv1	14009
ENSMUSG00000004267	84	87	118	2	37	12	80	75	104	4	31	11	50.78	86	15	182	-2457	-3377	0.000732810697778952	0.00335091208868215	0.3399	0.0358	0.0575	0.3399	TRUE	43085	enolase 2, gamma neuronal [Source:MGI Symbol;Acc:MGI:95394]	6	124760053	124769673	-1	Eno2	13807
ENSMUSG00000004347	68	78	101	0	15	13	65	67	89	0	13	12	40.91	74	8	127	-2973	-7627	2.40345	47.5596	0.1918	44	0.0462	0.0462	TRUE	0.8424	phosphodiesterase 1C [Source:MGI Symbol;Acc:MGI:108413]	6	56069804	56652487	-1	Pde1c	18575
ENSMUSG00000004540	28	63	59	7	27	20	27	55	52	12	23	18	31.03	45	18	412	-1279	-3395	0.000685716466996359	0.00315604732269485	0.0832	0.0575	0.0621	0.0621	TRUE	0.9547	pregnancy specific glycoprotein 17 [Source:MGI Symbol;Acc:MGI:1347250]	7	18813937	18821607	-1	Psg17	26437
ENSMUSG00000004552	765	908	891	65	143	154	728	786	784	115	121	138	445.26	766	125	164	-2606	-22711	3.4786e-100	1.87638e-97	0	0.0054	0.0046	0.0046	TRUE	0.0933	cathepsin E [Source:MGI Symbol;Acc:MGI:107361]	1	131638306	131675505	1	Ctse	13034
[truncated: 607 more rows]

## Sheet: M-UP
Ensembl.Gene.ID	GFP1	GFP2	GFP3	M1	M2	M3	norm.GFP1	norm.GFP2	norm.GFP3	norm.M1	norm.M2	norm.M3	baseMean	GFP	M	FoldChange	log2FoldChange	stat	pvalue	padj	dispGeneEst	dispFit	dispMAP	dispersion	betaConv	maxCooks	Gene.description	Chromosome.scaffold.name	Gene.start..bp.	Gene.end..bp.	Strand	Gene.name	EntrezID
[truncated: 800 more rows]

[truncated: 4 more sheets: N-DOWN, N-UP, S-DOWN, S-UP]
