# Supplementary material for: Metabolic dyshomeostasis induced by SARS-CoV-2 structural proteins reveals immunological insights into viral olfactory interactions
Source: bioRxiv preprint, doi:10.1101/2022.02.01.478724, version 1 (2022-02-02)
Supplement: Supplemental Table 2 [file 478724_file13.xlsx]

## Sheet: Identified proteins
Protein	Protein names	Gene names (primary )	Peptides	E1-007	E2-014	E3-021	E4-028	GFP1-002	GFP3-016	GFP4-023	M1-006	M2-013	M3-020	M4-027	N1-005	N2-012	N3-019	N4-026	S1-004	S2-011	S3-018	S4-025	Species
Q9QXS1	Plectin (PCN) (PLTN) (Plectin-1) (Plectin-6)	Plec	20	2715713	2.82408e+06	3.29272e+06	4293146	8891993	9717664	7520029	3.19377e+06	3263345	3.30132e+06	4.0739e+06	4.16335e+06	4.06105e+06	3.69114e+06	4883582	7582239	5.91648e+06	6.8097e+06	7.0338e+06	MOUSE
E9Q616	AHNAK nucleoprotein (desmoyokin)	Ahnak	19	2.02608e+06	1.68137e+06	2138689	2.54331e+06	4331271	5.30442e+06	4267799	2.14661e+06	1943069	2.14261e+06	2.66956e+06	2.14012e+06	1.89556e+06	1.87206e+06	2.38237e+06	2.25515e+06	1.83494e+06	2.22322e+06	2.33191e+06	MOUSE
Q9JHU4	Cytoplasmic dynein 1 heavy chain 1 (Cytoplasmic dynein heavy chain 1) (Dynein heavy chain, cytosolic)	Dync1h1	19	2.11312e+06	1.88939e+06	2.28594e+06	2.9123e+06	1.94983e+06	2.26836e+06	1.99057e+06	1.81297e+06	1.79755e+06	2352486	2.69312e+06	1.6712e+06	2.03211e+06	1714919	2.23204e+06	2022085	1.93912e+06	2.52026e+06	2.46593e+06	MOUSE
Q8VDD5	Myosin-9 (Cellular myosin heavy chain, type A) (Myosin heavy chain 9) (Myosin heavy chain, non-muscle IIa) (Non-muscle myosin heavy chain A) (NMMHC-A) (Non-muscle myosin heavy chain IIa) (NMMHC II-a) (NMMHC-IIA)	Myh9	20	11377340	10180986	12822919	14965943	10372202	11019432	9781430	11006684	10677785	12108229	14345153	9526024	9554056	8311806	10880794	9520505	8693103	11017313	11719231	MOUSE
B7FAU9	Filamin, alpha (Filamin-A)	Flna	20	7.59295e+06	7492491	9054028	11235398	6.06549e+06	7786236	7.55253e+06	7.44874e+06	7543470	8504877	10162338	5567895	6.28125e+06	4.36168e+06	7309561	5.01249e+06	4.88782e+06	6396919	6272880	MOUSE
P26039	Talin-1	Tln1	20	3145546	3.01418e+06	3.68296e+06	4423700	3.53777e+06	3739308	3.27396e+06	2.82211e+06	2.74448e+06	2997870	3.53276e+06	2.60788e+06	2.85719e+06	2.46971e+06	3.39131e+06	2.05679e+06	2.008e+06	2.66539e+06	2.57639e+06	MOUSE
E9PX70	Collagen alpha-1(XII) chain	Col12a1	20	1.62059e+06	1.37732e+06	1829788	2120787	2.07228e+06	1.84184e+06	1.72303e+06	871532	764559	1.05247e+06	1.15983e+06	2166350	2392790	2.09133e+06	2.46322e+06	1.5464e+06	1.42393e+06	1.53871e+06	1.48011e+06	MOUSE
Q80X90	Filamin-B (FLN-B) (ABP-280-like protein) (Actin-binding-like protein) (Beta-filamin)	Flnb	17	1.63587e+06	1.89734e+06	1855245	2.7047e+06	2.32402e+06	2.11074e+06	2.11809e+06	1.6419e+06	1.59921e+06	1.71824e+06	2.03303e+06	1.67951e+06	1.89423e+06	1.50699e+06	1.93376e+06	1.97653e+06	1.38781e+06	1.57156e+06	2296937	MOUSE
P19096	Fatty acid synthase (EC 2.3.1.85) (Type I Fatty Acid Synthase) [Includes: [Acyl-carrier-protein] S-acetyltransferase (EC 2.3.1.38);[Acyl-carrier-protein] S-malonyltransferase (EC 2.3.1.39);3-oxoacyl-[acyl-carrier-protein] synthase (EC 2.3.1.41);3-oxoacyl-[acyl-carrier-protein] reductase (EC 1.1.1.100);3-hydroxyacyl-[acyl-carrier-protein] dehydratase (EC 4.2.1.59);Enoyl-[acyl-carrier-protein] redu…	Fasn	20	2387403	2370328	2.76232e+06	3.56883e+06	3404248	2.96672e+06	2941726	2.37468e+06	2.43469e+06	2.35616e+06	2.87958e+06	2947549	2.58285e+06	2.37828e+06	3.14223e+06	3258293	2.68311e+06	3.49354e+06	3.76453e+06	MOUSE
A0A286YDF5	Myoferlin	Myof	18	1.44132e+06	1.39683e+06	1.59893e+06	1.96169e+06	1298232	1.72378e+06	1.71197e+06	1.25723e+06	1.36557e+06	1.53865e+06	1.79579e+06	1.14279e+06	1.49394e+06	1.46817e+06	1.45061e+06	1.63066e+06	1.53764e+06	1.76483e+06	1400239	MOUSE
P11276	Fibronectin (FN) [Cleaved into: Anastellin]	Fn1	4	731775	599238	797714	870619	700328	728056	589251	835567	615472	1.02074e+06	1.01995e+06	737515	712008	639682	813571	548105	441292	494938	512797	MOUSE
Q62261	Spectrin beta chain, non-erythrocytic 1 (Beta-II spectrin) (Embryonic liver fodrin) (Fodrin beta chain)	Sptbn1	17	624997	638076	730060	771583	1.26584e+06	1249787	1.14279e+06	458237	533819	631160	695798	740604	811278	702735	949199	1.04994e+06	884169	1.0489e+06	1.02742e+06	MOUSE
Q5SXR6	Clathrin heavy chain	Cltc	20	4045720	3488908	4.40356e+06	5.33621e+06	5.67763e+06	4872501	4479914	4045181	3.61602e+06	4.09622e+06	4.8481e+06	4.84121e+06	4.14144e+06	4.08099e+06	5142119	5.27886e+06	4076913	5119977	5490746	MOUSE
E9PVA8	eIF-2-alpha kinase activator GCN1 (GCN1 eIF-2-alpha kinase activator homolog) (GCN1-like protein 1) (General control of amino-acid synthesis 1-like protein 1) (Translational activator GCN1)	Gcn1	13	459113	485013	579770	742679	427606	559865	554932	450928	530749	533181	709415	520052	606611	537539	786973	533724	668502	877902	706155	MOUSE
Q99PV0	Pre-mRNA-processing-splicing factor 8 (Splicing factor Prp8)	Prpf8	15	795449	697029	874842	1180635	825329	737951	716768	810040	803338	878907	1.04396e+06	654101	795794	757864	922938	1.08712e+06	896026	1.05317e+06	1.17221e+06	MOUSE
A2AN08	E3 ubiquitin-protein ligase UBR4 (EC 2.3.2.27) (N-recognin-4) (RING-type E3 ubiquitin transferase UBR4) (Zinc finger UBR1-type protein 1) (p600)	Ubr4	8	164368	164317	225931	215257	169471	175064	209014	175320	201370	195197	264627	120886	197675	146008	180097	171364	170984	247797	236563	MOUSE
E9Q6R7	Utrophin	Utrn	9	134599	167352	195971	500950	510950	525971	425564	162570	384294	436305	256151	457184	401108	415051	497023	501687	224599	458608	446880	MOUSE
Q6P4T2	U5 small nuclear ribonucleoprotein 200 kDa helicase (EC 3.6.4.13) (BRR2 homolog) (U5 snRNP-specific 200 kDa protein) (U5-200KD)	Snrnp200	14	627648	552698	772185	898756	983959	802298	715773	638269	687128	975833	903959	1003626	920407	875940	1.22849e+06	1.22078e+06	981483	1.10856e+06	1.13605e+06	MOUSE
B2RQC6	CAD protein [Includes: Glutamine-dependent carbamoyl-phosphate synthase (EC 6.3.5.5);Aspartate carbamoyltransferase (EC 2.1.3.2);Dihydroorotase (EC 3.5.2.3)]	Cad	19	1.34767e+06	1.30841e+06	1594368	2.04347e+06	1.50203e+06	1.60185e+06	1.2915e+06	1.40737e+06	1.51581e+06	1.49056e+06	1.82348e+06	1.95854e+06	1.70613e+06	1.69909e+06	2.27304e+06	2.03871e+06	1.67099e+06	2.22518e+06	2.21228e+06	MOUSE
E9Q7G0	Nuclear mitotic apparatus protein 1 (Nuclear mitotic apparatus protein) (NuMA protein)	Numa1	12	261808	252619	298832	330207	352626	478725	357923	282352	290699	307416	381034	317159	362507	313785	435703	430584	371680	391202	341365	MOUSE
Q9JKF1	Ras GTPase-activating-like protein IQGAP1	Iqgap1	17	1546541	1.41825e+06	1.66138e+06	2.06928e+06	1.5485e+06	1.68646e+06	1953541	1.62268e+06	1.58079e+06	1.79207e+06	2.24704e+06	890502	1.13238e+06	1.0479e+06	1.24412e+06	1.08364e+06	1093197	1482282	1.34665e+06	MOUSE
A0A0R4J0I9	Prolow-density lipoprotein receptor-related protein 1	Lrp1	17	953375	855409	1140118	1.29057e+06	1.00007e+06	967788	869492	952921	909628	1.07444e+06	1.33943e+06	1.09593e+06	802932	967779	1.09466e+06	925240	813290	843115	929450	MOUSE
Q7M739	Nucleoprotein TPR	Tpr	12	487909	371910	408735	464726	552943	676894	443261	504465	410022	355761	684344	813654	586929	652720	889079	985467	698716	614994	625489	MOUSE
Q6P5H2	Nestin	Nes	17	1.19908e+06	1.22296e+06	1.3186e+06	1.65181e+06	1.47696e+06	1.71791e+06	1.38765e+06	1.16702e+06	1.14888e+06	1.24311e+06	1.4577e+06	1.17295e+06	1.06868e+06	882205	1.29444e+06	1.92343e+06	1.50202e+06	1.5195e+06	1.60682e+06	MOUSE
P11087	Collagen alpha-1(I) chain (Alpha-1 type I collagen)	Col1a1	19	8530983	9288625	10554919	11877923	5.74877e+06	6.36984e+06	5.44644e+06	5925868	7046068	6.61951e+06	7.20376e+06	12389590	12383750	10739009	14719453	9735792	8666977	9437071	9825331	MOUSE
F7ACR9	Microtubule-actin cross-linking factor 1 (Fragment)	Macf1	3	72029.2	40088.7	68873.2	82467.9	68516.2	69485.8	74415.4	51346.8	74611.3	73294.6	63078.7	53513.5	89402.5	58150.9	94998.9	50917	64496.4	96624.3	73946.7	MOUSE
Q8CGC7	Bifunctional glutamate/proline--tRNA ligase (Bifunctional aminoacyl-tRNA synthetase) [Includes: Glutamate--tRNA ligase (EC 6.1.1.17) (Glutamyl-tRNA synthetase) (GluRS);Proline--tRNA ligase (EC 6.1.1.15) (Prolyl-tRNA synthetase) (ProRS)]	Eprs1	19	2.50354e+06	2.4673e+06	3055805	3.68647e+06	2.37895e+06	2.65476e+06	2.38235e+06	2.70866e+06	2745704	3.03219e+06	3337637	2.54834e+06	2697255	2.28089e+06	3250222	2157117	2.09132e+06	2.72295e+06	2.78282e+06	MOUSE
Q64727	Vinculin (Metavinculin)	Vcl	18	2.65897e+06	2.285e+06	3.32514e+06	3.65448e+06	2.80166e+06	2.3079e+06	2.46342e+06	2.42012e+06	2.43902e+06	2.88071e+06	2.90114e+06	2.498e+06	2.24406e+06	2209601	2.86554e+06	1.93116e+06	1669414	2.17421e+06	2.18741e+06	MOUSE
A0A171EBL2	E3 ubiquitin-protein ligase RNF213	Rnf213	4	85883.4	70979.3	91134.1	111639	74800	128254	71579.3	65446.2	40901.3	72526.1	118870	69708.5	74914.2	73643.5	74187.3	94416.4	90527.9	114207	112182	MOUSE
P57780	Alpha-actinin-4 (Non-muscle alpha-actinin 4)	Actn4	18	2443154	2.34931e+06	2.85018e+06	3.40015e+06	2725758	3053954	2.38621e+06	2.5031e+06	2.35256e+06	2463367	2949787	2.63501e+06	2350893	2.12656e+06	2.94149e+06	2.19426e+06	1865029	2.3657e+06	2.56466e+06	MOUSE
Q6PB66	Leucine-rich PPR motif-containing protein, mitochondrial (130 kDa leucine-rich protein) (LRP 130) (mLRP130)	Lrpprc	18	1.05377e+06	876569	1.25036e+06	1.44017e+06	1.23119e+06	996238	992268	1.3731e+06	1.32662e+06	1.5642e+06	1.83511e+06	1.47782e+06	994398	1.2056e+06	1.2475e+06	879924	959194	891917	1.07704e+06	MOUSE
Q9ERU9	E3 SUMO-protein ligase RanBP2 (EC 2.3.2.-) (Ran-binding protein 2) (RanBP2)	Ranbp2	11	293750	293751	309282	393199	379164	320183	335587	268892	242655	287044	266569	416171	423611	435364	485378	523101	435624	517508	499115	MOUSE
A2AFQ0	HECT-type E3 ubiquitin transferase (EC 2.3.2.26)	Huwe1	8	202562	189411	237077	336459	220536	236841	260863	197449	246882	266613	316619	204046	307371	209925	319627	285594	288863	350367	291717	MOUSE
Q6ZQ38	Cullin-associated NEDD8-dissociated protein 1 (Cullin-associated and neddylation-dissociated protein 1) (p120 CAND1)	Cand1	18	2954388	2533328	3.51698e+06	4420532	3517236	2.45871e+06	2.95684e+06	3.28457e+06	3.06645e+06	3433617	4.06313e+06	3.93724e+06	3.42246e+06	3.36136e+06	4392829	3.6336e+06	2.98463e+06	3.88508e+06	4196004	MOUSE
Q5SWU9	Acetyl-CoA carboxylase 1 (ACC1) (EC 6.4.1.2) (ACC-alpha) (Acetyl-CoA carboxylase 265)	Acaca	11	296736	255044	295677	465838	371954	367847	300271	316821	303417	286529	384702	351411	278032	314105	428746	384383	300753	405568	378509	MOUSE
P08113	Endoplasmin (94 kDa glucose-regulated protein) (GRP-94) (Endoplasmic reticulum resident protein 99) (ERp99) (Heat shock protein 90 kDa beta member 1) (Polymorphic tumor rejection antigen 1) (Tumor rejection antigen gp96)	Hsp90b1	20	14634780	14116089	17801352	21299852	16665009	15162025	13903278	13916859	14300761	15987923	17920950	19949436	18323356	17823922	23285376	24287904	20038716	23018258	23601828	MOUSE
P23116	Eukaryotic translation initiation factor 3 subunit A (eIF3a) (Centrosomin) (Eukaryotic translation initiation factor 3 subunit 10) (eIF-3-theta) (eIF3 p167) (eIF3 p180) (eIF3 p185) (p162)	Eif3a	19	1.93393e+06	1.62894e+06	1.94246e+06	2.96869e+06	2.47521e+06	2.34616e+06	2.07646e+06	1.76305e+06	1.92787e+06	1.89433e+06	2.30234e+06	2.09313e+06	2025001	1.81146e+06	2.2976e+06	2.2907e+06	1.93207e+06	2853909	2.69679e+06	MOUSE
Q6P5E4	UDP-glucose:glycoprotein glucosyltransferase 1 (UGT1) (EC 2.4.1.-) (UDP--Glc:glycoprotein glucosyltransferase) (UDP-glucose ceramide glucosyltransferase-like 1)	Uggt1	15	805840	794447	937926	1.19046e+06	1.11885e+06	1.02248e+06	908444	857447	918659	1.09128e+06	1.22397e+06	1.05341e+06	1.0308e+06	994147	1.15756e+06	977806	934412	1.03938e+06	1.07268e+06	MOUSE
P58252	Elongation factor 2 (EF-2)	Eef2	20	19827968	18088098	20493516	24666500	20323262	19478342	17835814	17270306	17908014	17789950	20531436	22034918	19462794	18245958	23814722	23850702	20855278	26165288	27457842	MOUSE
Q7TPV4	Myb-binding protein 1A (Myb-binding protein of 160 kDa)	Mybbp1a	19	2.62222e+06	2.32531e+06	2839680	3.41667e+06	1.15113e+06	844097	1.31797e+06	2.68081e+06	2.89198e+06	3.36995e+06	3.65998e+06	1.45636e+06	1.49309e+06	1.43674e+06	1.84239e+06	1.89048e+06	1.86426e+06	1.93684e+06	1.74051e+06	MOUSE
S4R1P5	Dystonin	Dst	4	64703.1	51274.9	190241	260406	227933	87806.1	206240	174990	161980	166370	241569	238240	81355.4	76601.8	88707.8	239034	69047.2	94219.8	260008	MOUSE
P11499	Heat shock protein HSP 90-beta (Heat shock 84 kDa) (HSP 84) (HSP84) (Tumor-specific transplantation 84 kDa antigen) (TSTA)	Hsp90ab1	18	8894412	9161996	10477185	18401874	10130791	10017804	8424199	9847290	10483464	10003713	12457384	11743981	10820236	9382055	18142648	12705315	10324480	18910440	19838266	MOUSE
A2ANY6	Midasin	Mdn1	2	18544.7	33326.3	36290.2	25369.7	30071	35962.6	18628.1	10143.4	22108	21881.8	40710.8	18710.8	8064.54	13518.5	61323.5	21785.7	13303.9	68411.3	21330.9	MOUSE
Q6PDI5	Proteasome adapter and scaffold protein ECM29 (Proteasome-associated protein ECM29 homolog)	Ecpas	12	526537	503365	536261	725024	858389	766796	780475	560204	486830	570028	789174	551080	452208	432344	550587	437524	300921	494475	503074	MOUSE
Q01853	Transitional endoplasmic reticulum ATPase (TER ATPase) (EC 3.6.4.6) (15S Mg(2+)-ATPase p97 subunit) (Valosin-containing protein) (VCP)	Vcp	20	6984620	6.37071e+06	8.23133e+06	10220663	8615498	7235917	7794383	6.70773e+06	6.47197e+06	6910483	8181941	7.55946e+06	6555008	6435218	8522486	7981503	6.43799e+06	7982391	8494071	MOUSE
E9PZ16	Basement membrane-specific heparan sulfate proteoglycan core protein	Hspg2	14	530421	514960	530261	776832	395028	347103	362869	377965	351365	471566	599408	525061	433313	416388	569399	323280	334631	359763	402494	MOUSE
P48678	Prelamin-A/C [Cleaved into: Lamin-A/C]	Lmna	20	6.09311e+06	5.81508e+06	6984389	7756240	12953756	14230451	11701316	6434901	6.69017e+06	7089826	7.6412e+06	9858550	9942044	8748261	12026281	12675435	10576487	10602422	10875660	MOUSE
Q4FE56	Ubiquitinyl hydrolase 1 (EC 3.4.19.12)	Usp9x	11	338753	272590	339239	446981	444727	386413	414163	312629	276472	371594	461904	414907	366984	337286	478609	383856	342250	418835	482839	MOUSE
Q8BU30	Isoleucine--tRNA ligase, cytoplasmic (EC 6.1.1.5) (Isoleucyl-tRNA synthetase) (IRS) (IleRS)	Iars1	17	1.80275e+06	1732996	1930644	2760414	1869498	1.94076e+06	1.80037e+06	1.99038e+06	2.07567e+06	2.08632e+06	2.689e+06	1.65907e+06	1.87755e+06	1.43528e+06	2193313	1.37629e+06	1.23254e+06	1.73436e+06	1713384	MOUSE
Q8VHX6	Filamin-C (FLN-C) (ABP-280-like protein) (ABP-L) (Actin-binding-like protein) (Filamin-2) (Gamma-filamin)	Flnc	11	133609	111998	143674	174830	563927	417165	436983	152589	152064	117411	204641	228135	140381	150110	190347	167789	136012	227753	194232	MOUSE
P20152	Vimentin	Vim	20	37773844	37333872	43418008	49826520	80425880	78716128	72192400	38964808	40479680	42217948	46986264	74459880	72442808	68056640	82740760	77484448	63418220	62683624	64324376	MOUSE
Q8K009	Mitochondrial 10-formyltetrahydrofolate dehydrogenase (Mitochondrial 10-FTHFDH) (mtFDH) (EC 1.5.1.6) (Aldehyde dehydrogenase family 1 member L2)	Aldh1l2	17	3.65835e+06	2.93258e+06	3.90508e+06	4.72084e+06	2497218	2.1507e+06	1.87082e+06	4.05144e+06	3.53026e+06	4.63191e+06	5.32447e+06	3057502	2.14701e+06	2.58018e+06	3.00671e+06	1.94231e+06	1.63778e+06	1746973	1.85218e+06	MOUSE
P26041	Moesin (Membrane-organizing extension spike protein)	Msn	20	6.19298e+06	6.33631e+06	7049567	8524649	4519109	5048533	4.84011e+06	5808591	6.13753e+06	6.53437e+06	7.47139e+06	4.22235e+06	4.86679e+06	3.83749e+06	5.4831e+06	4.04845e+06	4277840	5.51814e+06	5.51748e+06	MOUSE
E9QAH1	Golgi autoantigen, golgin subfamily b, macrogolgin 1	Golgb1	2	49478.5	41682.6	49150.1	58264.2	51681.6	72535.8	59197.7	38974.1	26787.8	31382.9	51205.3	74789.9	58064.2	66493.3	78175.7	81759.5	63311.5	68335.8	46409.3	MOUSE
G3X9B1	HEAT repeat-containing protein 1	Heatr1	7	175910	186793	210020	315398	130745	187431	116347	203692	208549	244167	325809	108992	166834	152764	215023	173059	266262	323998	258933	MOUSE
Q8VDJ3	Vigilin (High density lipoprotein-binding protein) (HDL-binding protein)	Hdlbp	16	978080	902118	1.05319e+06	1300795	1.08485e+06	1.12804e+06	1.06703e+06	905691	895424	946272	1.19475e+06	948769	1.03393e+06	857344	1.12427e+06	1.06884e+06	952462	1212335	1.2194e+06	MOUSE
Q3U2G2	Heat shock 70 kDa protein 4	Hspa4	15	2.15592e+06	1.99591e+06	2.48537e+06	3.06193e+06	2.57497e+06	2.3819e+06	2.3122e+06	2412712	2.29876e+06	2.44526e+06	2.8633e+06	2.5512e+06	2255843	2.06402e+06	2667117	2.66214e+06	2.19428e+06	2.62557e+06	2.90312e+06	MOUSE
Q64514	Tripeptidyl-peptidase 2 (TPP-2) (EC 3.4.14.10) (Tripeptidyl aminopeptidase) (Tripeptidyl-peptidase II) (TPP-II)	Tpp2	11	440864	390880	547779	680489	711717	580900	617247	533738	519039	533075	661597	704976	667077	588256	693060	749420	626002	708726	820256	MOUSE
O70318	Band 4.1-like protein 2 (Erythrocyte membrane protein band 4.1-like 2) (Generally expressed protein 4.1) (4.1G)	Epb41l2	17	1.28467e+06	1.20743e+06	1.4775e+06	1589019	1.55584e+06	1.8524e+06	1.80288e+06	1.2913e+06	1.11619e+06	1.48733e+06	1.61544e+06	1.33876e+06	1.63014e+06	1.39082e+06	2096240	1.76079e+06	1.68168e+06	1.76902e+06	1.87649e+06	MOUSE
Q6ZQ08	CCR4-NOT transcription complex subunit 1 (CCR4-associated factor 1)	Cnot1	11	326623	356104	369837	546802	397144	274595	285524	340034	337575	370358	510324	444388	306484	376773	465423	402921	311149	525893	365260	MOUSE
Q78PY7	Staphylococcal nuclease domain-containing protein 1 (EC 3.1.31.1) (100 kDa coactivator) (p100 co-activator)	Snd1	18	2.49731e+06	2.3024e+06	2.84172e+06	3.48446e+06	3.22653e+06	3033162	3.09177e+06	2.65216e+06	2.58436e+06	3.01916e+06	3.38436e+06	2.69382e+06	2.75852e+06	2.4735e+06	3.22773e+06	3200633	2973505	3135597	3719767	MOUSE
E9QNN1	DEAH box protein 9 (EC 3.6.4.13) (Nuclear DNA helicase II)	Dhx9	18	1.81965e+06	1.59481e+06	1.98863e+06	2.32617e+06	2.26039e+06	1.83822e+06	1.98138e+06	1.88394e+06	1.85451e+06	1.98426e+06	2.46851e+06	2.32958e+06	2.24371e+06	2.26078e+06	2686712	3.25834e+06	2.4972e+06	2.79071e+06	2.85049e+06	MOUSE
Q9JIK5	Nucleolar RNA helicase 2 (EC 3.6.4.13) (DEAD box protein 21) (Gu-alpha) (Nucleolar RNA helicase Gu) (Nucleolar RNA helicase II) (RH II/Gu)	Ddx21	15	1710835	1.77488e+06	2.01833e+06	2.65664e+06	827101	776470	811548	1.70332e+06	1.97243e+06	2116181	2451864	1.23988e+06	1.03257e+06	999653	1235782	1.32568e+06	1.14651e+06	1.48837e+06	1.5034e+06	MOUSE
Q01149	Collagen alpha-2(I) chain (Alpha-2 type I collagen)	Col1a2	18	820461	778476	990557	1.10069e+06	287920	332681	322064	300482	308780	369851	405791	940330	889360	878092	1.05405e+06	175703	164594	293076	229781	MOUSE
S4R2P8	Baculoviral IAP repeat-containing protein 6	Birc6	8	319200	301293	348021	497917	331560	493500	388074	340411	364252	364227	488066	312228	357226	367007	431445	486359	438352	528832	505785	MOUSE
Q8CIE6	Coatomer subunit alpha (Alpha-coat protein) (Alpha-COP) [Cleaved into: Xenin (Xenopsin-related peptide);Proxenin]	Copa	17	1.59097e+06	1.56244e+06	1.9862e+06	2.60363e+06	1.56966e+06	1.62862e+06	1.47858e+06	1.44812e+06	1486015	1.66479e+06	2.09093e+06	1.51143e+06	1.45412e+06	1.34809e+06	1.40322e+06	1.36205e+06	1.29839e+06	1.96854e+06	1.99617e+06	MOUSE
Q8BHN3	Neutral alpha-glucosidase AB (EC 3.2.1.207) (Alpha-glucosidase 2) (Glucosidase II subunit alpha)	Ganab	19	1.89636e+06	1.50024e+06	2.02391e+06	1.99354e+06	3.62239e+06	3.00662e+06	2.7413e+06	2323720	2.00747e+06	2.39047e+06	2.91726e+06	2.93036e+06	2.55945e+06	2.43514e+06	3054052	3.45041e+06	2.6048e+06	3.201e+06	3.14759e+06	MOUSE
Q3V117	ATP-citrate synthase (EC 2.3.3.8) (ATP-citrate (pro-S-)-lyase) (Citrate cleavage enzyme)	Acly	17	2311449	2.08597e+06	2.78129e+06	3.41384e+06	2.59999e+06	2.41488e+06	2534273	2.50173e+06	2.62793e+06	2.85795e+06	3.49223e+06	2.37919e+06	2.65991e+06	2.39069e+06	3228436	2.62301e+06	2.39646e+06	3204342	3285385	MOUSE
Q9WTI7	Unconventional myosin-Ic (Myosin I beta) (MMI-beta) (MMIb)	Myo1c	16	758139	549420	672444	914356	1.49281e+06	989104	1.11108e+06	571620	536621	700190	769351	1.10059e+06	841343	760017	1.06363e+06	670731	428754	575642	797938	MOUSE
P63017	Heat shock cognate 71 kDa protein (EC 3.6.4.10) (Heat shock 70 kDa protein 8)	Hspa8	16	12685633	12527158	14512746	18363730	14870824	15446049	13057886	13345813	13284100	13850749	16357123	14505379	13671021	12053460	16783824	17404568	14878877	18887466	19300354	MOUSE
Q02053	Ubiquitin-like modifier-activating enzyme 1 (EC 6.2.1.45) (Ubiquitin-activating enzyme E1) (Ubiquitin-activating enzyme E1 X) (Ubiquitin-like modifier-activating enzyme 1 X)	Uba1	19	3067574	2.74051e+06	3.46124e+06	4.21943e+06	4477116	3867126	3644085	3.36126e+06	3269206	3.56694e+06	4.22136e+06	3.7276e+06	3.26903e+06	3.02604e+06	4.09618e+06	4.16e+06	3.50116e+06	4377131	4705718	MOUSE
G5E866	Splicing factor 3B subunit 1	Sf3b1	13	724146	637278	765554	928786	680787	669640	759275	688238	744396	856731	1.03929e+06	699912	745662	739420	932428	978196	879516	964958	940050	MOUSE
E9PUM4	Talin-2	Tln2	4	60536.1	94870.4	105357	147468	133939	102120	129613	103810	100458	115682	151614	128241	119696	109527	163360	134943	130140	165244	169654	MOUSE
Q9Z1Q9	Valine--tRNA ligase (EC 6.1.1.9) (Protein G7a) (Valyl-tRNA synthetase) (ValRS)	Vars1	17	1.37478e+06	1.63268e+06	1.53361e+06	2496777	1.79386e+06	1.63749e+06	1.74987e+06	1.53573e+06	1.83026e+06	1.73748e+06	2.02715e+06	1.48995e+06	1.5938e+06	1.42667e+06	1916660	1.37691e+06	1.50116e+06	2.06207e+06	2.15549e+06	MOUSE
Q8BMJ2	Leucine--tRNA ligase, cytoplasmic (EC 6.1.1.4) (Leucyl-tRNA synthetase) (LeuRS)	Lars1	19	1.79012e+06	1.62332e+06	2.00991e+06	2521556	1.52913e+06	1486021	1808565	2045967	1.98405e+06	2.30303e+06	2.63138e+06	1.24732e+06	1.44166e+06	1.23984e+06	1.53154e+06	1.23874e+06	1.21586e+06	1.67357e+06	1.5955e+06	MOUSE
Q922D8	C-1-tetrahydrofolate synthase, cytoplasmic (C1-THF synthase) [Cleaved into: C-1-tetrahydrofolate synthase, cytoplasmic, N-terminally processed] [Includes: Methylenetetrahydrofolate dehydrogenase (EC 1.5.1.5);Methenyltetrahydrofolate cyclohydrolase (EC 3.5.4.9);Formyltetrahydrofolate synthetase (EC 6.3.4.3)]	Mthfd1	15	1.0554e+06	974036	1.14964e+06	1436471	1.4452e+06	1.30281e+06	1.20524e+06	1.10031e+06	1.13924e+06	1.17773e+06	1.39031e+06	1345761	1.2722e+06	1.06186e+06	1.48806e+06	1447785	1.13126e+06	1.47123e+06	1.60169e+06	MOUSE
Q8VDM4	26S proteasome non-ATPase regulatory subunit 2 (26S proteasome regulatory subunit RPN1) (26S proteasome regulatory subunit S2) (26S proteasome subunit p97)	Psmd2	16	1.6715e+06	1615087	1.97406e+06	2.53239e+06	2.40724e+06	2.06656e+06	2.03997e+06	1.6944e+06	1.79935e+06	1.67814e+06	2251577	1.99075e+06	1.93981e+06	1.86845e+06	2.54975e+06	2266437	2.08525e+06	2.68019e+06	2.93534e+06	MOUSE
Q8VCQ8	Caldesmon 1	Cald1	3	260766	238652	284768	239889	360395	458650	300982	206999	275569	278668	266442	256295	227185	213919	312446	203265	183341	214451	212536	MOUSE
G3X922	DnaJ heat shock protein family (Hsp40) member C13	Dnajc13	8	172956	129077	187858	206706	195308	130765	206346	128417	64366.2	184123	242794	161539	171527	157270	190959	169017	143526	212321	197118	MOUSE
P63038	60 kDa heat shock protein, mitochondrial (EC 5.6.1.7) (60 kDa chaperonin) (Chaperonin 60) (CPN60) (HSP-65) (Heat shock protein 60) (HSP-60) (Hsp60) (Mitochondrial matrix protein P1)	Hspd1	20	11628459	10741798	14082975	16267657	14376773	11832301	11492679	15163064	14941319	17007642	18840308	20494420	15372741	17690046	21030588	17045628	15110397	14861072	16885328	MOUSE
Q3UPL0	Protein transport protein Sec31A (SEC31-like protein 1) (SEC31-related protein A)	Sec31a	16	776775	700424	922662	1.09204e+06	946561	896405	885574	740270	718812	808845	947928	988040	888426	824034	1.14683e+06	951002	857781	1.06567e+06	1154555	MOUSE
Q9ERK4	Exportin-2 (Exp2) (Chromosome segregation 1-like protein) (Importin-alpha re-exporter)	Cse1l	16	732729	773186	907366	1.1039e+06	767591	636836	846310	793163	755533	764841	982721	962084	1.06255e+06	947524	958156	864967	757044	1.16245e+06	1168007	MOUSE
Q9CW03	Structural maintenance of chromosomes protein 3 (SMC protein 3) (SMC-3) (Basement membrane-associated chondroitin proteoglycan) (Bamacan) (Chondroitin sulfate proteoglycan 6) (Chromosome segregation protein SmcD) (Mad member-interacting protein 1)	Smc3	11	262390	257446	328365	345928	320421	386231	356130	295982	267626	268889	353447	350814	363041	286583	390515	482032	407717	469223	456746	MOUSE
Q921M3	Splicing factor 3B subunit 3 (Pre-mRNA-splicing factor SF3b 130 kDa subunit) (SF3b130) (Spliceosome-associated protein 130) (SAP 130)	Sf3b3	19	1.4712e+06	1.34688e+06	1.48616e+06	1.95838e+06	2.15331e+06	1.86931e+06	1.59492e+06	1.39271e+06	1.37094e+06	1.54659e+06	1.81447e+06	2.02466e+06	1.90865e+06	1.80726e+06	2.43482e+06	2.89054e+06	2.06741e+06	2.51729e+06	2.77282e+06	MOUSE
Q8CG48	Structural maintenance of chromosomes protein 2 (SMC protein 2) (SMC-2) (Chromosome-associated protein E) (FGF-inducible protein 16) (XCAP-E homolog)	Smc2	7	190782	199603	223406	316783	220882	301929	203753	187943	200958	214118	200090	266185	265377	201599	321207	300667	238435	292541	280032	MOUSE
F6RPJ9	Insulin-degrading enzyme (Fragment)	Ide	15	797122	766254	916844	1.08569e+06	897296	967124	804189	830905	828734	941996	1.18427e+06	846656	856074	754630	1.04338e+06	1.07198e+06	923535	1.2381e+06	1.29939e+06	MOUSE
Q3U1J4	DNA damage-binding protein 1 (DDB p127 subunit) (Damage-specific DNA-binding protein 1) (UV-damaged DNA-binding factor)	Ddb1	17	1208787	1112719	1.36353e+06	1.70486e+06	1.67579e+06	1.53531e+06	1.43659e+06	1.13694e+06	1.1252e+06	1.18614e+06	1.4354e+06	1.66109e+06	1390992	1347144	1.74536e+06	1.76398e+06	1.38246e+06	1.70156e+06	1.77466e+06	MOUSE
Q8CAQ8	MICOS complex subunit Mic60 (Mitochondrial inner membrane protein) (Mitofilin)	Immt	9	586192	494772	642129	746742	963418	1.03429e+06	960683	716379	694394	871752	971094	922029	952979	831163	1.18592e+06	865546	724713	719495	689492	MOUSE
O55143	Sarcoplasmic/endoplasmic reticulum calcium ATPase 2 (SERCA2) (SR Ca(2+)-ATPase 2) (EC 7.2.2.10) (Calcium pump 2) (Calcium-transporting ATPase sarcoplasmic reticulum type, slow twitch skeletal muscle isoform) (Endoplasmic reticulum class 1/2 Ca(2+) ATPase)	Atp2a2	11	876633	780482	947494	1.04047e+06	326159	447453	488487	740282	724941	1.03708e+06	1.03967e+06	335792	539114	541480	474400	423995	469234	803614	374473	MOUSE
Q9Z110	Delta-1-pyrroline-5-carboxylate synthase (P5CS) (Aldehyde dehydrogenase family 18 member A1) [Includes: Glutamate 5-kinase (GK) (EC 2.7.2.11) (Gamma-glutamyl kinase);Gamma-glutamyl phosphate reductase (GPR) (EC 1.2.1.41) (Glutamate-5-semialdehyde dehydrogenase) (Glutamyl-gamma-semialdehyde dehydrogenase)]	Aldh18a1	16	2178706	1.73959e+06	2.21597e+06	3014484	2135076	1.93984e+06	1.7178e+06	2.64149e+06	2.55461e+06	2.73691e+06	3.39092e+06	2.18738e+06	1.96394e+06	2.11813e+06	2.57911e+06	1.89115e+06	1.67295e+06	1.84657e+06	2.00022e+06	MOUSE
P08121	Collagen alpha-1(III) chain	Col3a1	15	514610	468308	599190	605048	536289	573368	493761	246194	231134	278935	313172	763784	773628	690985	949573	923473	803264	888799	866739	MOUSE
P58871	182 kDa tankyrase-1-binding protein	Tnks1bp1	11	270796	301132	336949	423759	443726	465713	430048	308679	333129	350427	379668	425550	366771	372785	564980	475385	361117	396262	432325	MOUSE
Q9DBG3	AP-2 complex subunit beta (AP105B) (Adaptor protein complex AP-2 subunit beta) (Adaptor-related protein complex 2 subunit beta) (Beta-2-adaptin) (Beta-adaptin) (Clathrin assembly protein complex 2 beta large chain) (Plasma membrane adaptor HA2/AP2 adaptin beta subunit)	Ap2b1	16	813715	634406	977001	1.14494e+06	1.58075e+06	1113168	1.34786e+06	832821	740529	836905	961966	1.15645e+06	1.04715e+06	1.00924e+06	1.38314e+06	1.47583e+06	1.13414e+06	1.30981e+06	1415201	MOUSE
Q64737	Trifunctional purine biosynthetic protein adenosine-3 [Includes: Phosphoribosylamine--glycine ligase (EC 6.3.4.13) (Glycinamide ribonucleotide synthetase) (GARS) (Phosphoribosylglycinamide synthetase);Phosphoribosylformylglycinamidine cyclo-ligase (EC 6.3.3.1) (AIR synthase) (AIRS) (Phosphoribosyl-aminoimidazole synthetase);Phosphoribosylglycinamide formyltransferase (EC 2.1.2.2) (5'-phosphoribos…	Gart	16	1.28869e+06	1.22578e+06	1.49224e+06	1.90431e+06	1.27205e+06	1.1477e+06	1.08042e+06	1.437e+06	1.47625e+06	1.53073e+06	1.79968e+06	1.52035e+06	1.39626e+06	1.27334e+06	1.66707e+06	1.78804e+06	1.48675e+06	1.92068e+06	2043252	MOUSE
P43406	Integrin alpha-V (Vitronectin receptor subunit alpha) (CD antigen CD51) [Cleaved into: Integrin alpha-V heavy chain;Integrin alpha-V light chain]	Itgav	12	558177	456107	610363	782232	711930	526253	652664	518647	493016	627838	694729	713198	646474	635977	882397	698569	567014	650066	616200	MOUSE
Q3V3R1	Monofunctional C1-tetrahydrofolate synthase, mitochondrial (EC 6.3.4.3) (Formyltetrahydrofolate synthetase)	Mthfd1l	17	2595853	2.25823e+06	2966501	3399595	2666730	2.15324e+06	2.11717e+06	3200530	2.88697e+06	3.3457e+06	4.00835e+06	3318375	2.23659e+06	2.78686e+06	3.18341e+06	2761817	2299599	2.22608e+06	2.68887e+06	MOUSE
E9Q3X0	Major vault protein	Mvp	17	662762	543387	734002	771965	945754	791747	755988	592686	589842	624127	684161	678440	637487	559667	868816	858623	748596	1.0869e+06	900796	MOUSE
Q8VDN2	Sodium/potassium-transporting ATPase subunit alpha-1 (Na(+)/K(+) ATPase alpha-1 subunit) (EC 7.2.2.13) (Sodium pump subunit alpha-1)	Atp1a1	15	1.5952e+06	1.5278e+06	1705961	2.22133e+06	1.39349e+06	1.83752e+06	1.86611e+06	1.46105e+06	1.54457e+06	1.71585e+06	2.00979e+06	1.43964e+06	1.21977e+06	1413146	1.5152e+06	1.67615e+06	1.70726e+06	1.79306e+06	1.23807e+06	MOUSE
Q9EPU0	Regulator of nonsense transcripts 1 (EC 3.6.4.-) (ATP-dependent helicase RENT1) (Nonsense mRNA reducing factor 1) (NORF1) (Up-frameshift suppressor 1 homolog) (mUpf1)	Upf1	15	672641	777012	785687	910306	760877	907145	717629	602433	741630	720950	832673	830077	885778	809478	1.08252e+06	844128	794348	1.00008e+06	897920	MOUSE
Q8K411	Presequence protease, mitochondrial (EC 3.4.24.-) (Pitrilysin metalloproteinase 1)	Pitrm1	17	1.09873e+06	901820	1.05202e+06	1.3125e+06	1.17278e+06	1.14793e+06	1.025e+06	1.22728e+06	1.12317e+06	1.42616e+06	1.44519e+06	1.40866e+06	1.275e+06	1275164	1.49314e+06	858182	780999	1.03019e+06	871088	MOUSE
P38647	Stress-70 protein, mitochondrial (75 kDa glucose-regulated protein) (GRP-75) (Heat shock 70 kDa protein 9) (Mortalin) (Peptide-binding protein 74) (PBP74) (p66 MOT)	Hspa9	19	4.8185e+06	4415632	5556291	6.57821e+06	5985926	6041603	4.73127e+06	5578686	5.27048e+06	6153802	7.06726e+06	6151415	4.52249e+06	5005803	6.24973e+06	4.85893e+06	3.89207e+06	4003792	4.81993e+06	MOUSE
P27546	Microtubule-associated protein 4 (MAP-4)	Map4	16	1.00219e+06	984960	1.15698e+06	1.31848e+06	959969	1096734	1.07847e+06	960969	981293	1.01994e+06	1.1535e+06	892249	847793	635862	1001318	721475	795628	1.02368e+06	950065	MOUSE
A2AH85	116 kDa U5 small nuclear ribonucleoprotein component (U5 snRNP-specific protein, 116 kDa)	Eftud2	18	1.00023e+06	915421	1.15253e+06	1.47583e+06	1.58434e+06	1.29649e+06	1.32781e+06	1.08839e+06	1.04135e+06	1.21921e+06	1.35811e+06	1.67435e+06	1484680	1422499	1.86244e+06	2.21734e+06	1.62088e+06	1.7451e+06	1.94075e+06	MOUSE
Q9D0I9	Arginine--tRNA ligase, cytoplasmic (EC 6.1.1.19) (Arginyl-tRNA synthetase) (ArgRS)	Rars1	16	1.63218e+06	1.5826e+06	1.92055e+06	2.2439e+06	1.68188e+06	1.48757e+06	1.58814e+06	1.79394e+06	1.79881e+06	2.04243e+06	2.34882e+06	1.7238e+06	1.62914e+06	1.50727e+06	2.00982e+06	1.55021e+06	1.5486e+06	2.01331e+06	2.05433e+06	MOUSE
Q9JIF7	Coatomer subunit beta (Beta-coat protein) (Beta-COP)	Copb1	14	899412	853012	1.00369e+06	1.26557e+06	1.03127e+06	1.12307e+06	952453	857762	855439	916561	1033051	1.05796e+06	941621	803590	1.10058e+06	958964	916507	1.17981e+06	1.27444e+06	MOUSE
Q9D0R2	Threonine--tRNA ligase 1, cytoplasmic (EC 6.1.1.3) (Threonine--tRNA ligase, cytoplasmic) (Threonyl-tRNA synthetase) (ThrRS) (Threonyl-tRNA synthetase 1)	Tars1	17	2.1822e+06	1.96895e+06	2.43732e+06	3.00504e+06	2033127	2.12938e+06	1.97831e+06	2.23968e+06	2.19599e+06	2.571e+06	2956894	1.68064e+06	1.76332e+06	1542599	2.00128e+06	1.88704e+06	1.75385e+06	2.36317e+06	2.48247e+06	MOUSE
Q9QUR6	Prolyl endopeptidase (PE) (EC 3.4.21.26) (Post-proline cleaving enzyme)	Prep	18	2.29695e+06	2.15726e+06	2.60959e+06	3363361	2.56841e+06	2.29657e+06	2.04862e+06	2414433	2436251	2.60699e+06	3.19835e+06	3018350	2.44764e+06	2.34999e+06	3105702	2.89732e+06	2.33113e+06	3.00178e+06	3.41125e+06	MOUSE
Q8BKC5	Importin-5 (Imp5) (Importin subunit beta-3) (Karyopherin beta-3) (Ran-binding protein 5) (RanBP5)	Ipo5	13	767502	671912	903965	1.02236e+06	889376	754131	836229	749583	884426	873636	1.04774e+06	1.01177e+06	886336	866895	1.10403e+06	1.00701e+06	823894	1.0931e+06	1.22784e+06	MOUSE
P52480	Pyruvate kinase PKM (EC 2.7.1.40) (Pyruvate kinase muscle isozyme)	Pkm	20	15469907	15472181	19386886	22511282	20743080	21213270	19799600	18312580	17345116	18937472	22091058	16439956	16011178	13898387	19435330	18062262	15762836	21015808	20497804	MOUSE
P80318	T-complex protein 1 subunit gamma (TCP-1-gamma) (CCT-gamma) (Matricin) (mTRiC-P5)	Cct3	17	3.86603e+06	3707549	4447869	5709473	4294256	4.21966e+06	4.09867e+06	4.11037e+06	4.26368e+06	4.50212e+06	5.51664e+06	4.59684e+06	4706129	4.31235e+06	5747237	4.9117e+06	4316441	5643745	5.807e+06	MOUSE
Q8BGQ7	Alanine--tRNA ligase, cytoplasmic (EC 6.1.1.7) (Alanyl-tRNA synthetase) (AlaRS) (Protein sticky) (Sti)	Aars1	17	2.3929e+06	2.18777e+06	2716395	3.27894e+06	2784985	2.6688e+06	2525083	2.93109e+06	2.85974e+06	3134401	3.54371e+06	2.19937e+06	2.03505e+06	1.76971e+06	2483537	2350561	2.11788e+06	2.7477e+06	2.85584e+06	MOUSE
B9EJ54	Nucleoporin 205 (Nup205 protein)	Nup205	9	171542	140777	228823	292509	241639	176271	208651	185631	191289	260972	246140	323455	261066	285549	330464	355249	238110	315395	337186	MOUSE
Q62167	ATP-dependent RNA helicase DDX3X (EC 3.6.4.13) (D1Pas1-related sequence 2) (DEAD box RNA helicase DEAD3) (mDEAD3) (DEAD box protein 3, X-chromosomal) (Embryonic RNA helicase)	Ddx3x	7	647927	604104	762570	960880	616151	485179	638766	673689	700364	762665	894171	615639	648169	628482	828377	744495	726075	830708	909162	MOUSE
Q61598	Rab GDP dissociation inhibitor beta (Rab GDI beta) (GDI-3) (Guanosine diphosphate dissociation inhibitor 2) (GDI-2)	Gdi2	16	2.15962e+06	1927780	2506516	3.16318e+06	3.44122e+06	2.81867e+06	2.67448e+06	2376156	2294569	2.48567e+06	3.07481e+06	2.99448e+06	2652094	2545897	3.35524e+06	2.31076e+06	1.9392e+06	2.6721e+06	2836850	MOUSE
Q8BX70	Vacuolar protein sorting-associated protein 13C	Vps13c	2	27047.9	20145.7	44704.8	33836.1	39454.7	22577.5	59015.3	37584.3	14854.1	35134.9	30920	17227.2	30575.3	34126.4	49646	37734.1	39457.1	44932.1	46740.1	MOUSE
Q9WU78	Programmed cell death 6-interacting protein (ALG-2-interacting protein 1) (ALG-2-interacting protein X) (E2F1-inducible protein) (Eig2)	Pdcd6ip	13	803870	757610	976328	1.22368e+06	1.04261e+06	1.11966e+06	878584	880455	815138	844821	1.09235e+06	1.00601e+06	867404	811973	1.10589e+06	934125	775870	957898	1.08322e+06	MOUSE
Q9D0E1	Heterogeneous nuclear ribonucleoprotein M (hnRNP M)	Hnrnpm	18	3.59232e+06	3.28176e+06	4.1995e+06	5018984	5.71635e+06	5.34766e+06	5.14774e+06	4283373	4190128	4.82802e+06	5571121	5189886	5.06237e+06	4943967	6440231	7.21588e+06	5625644	6255203	6.42131e+06	MOUSE
A0A0R4J0Z1	Protein disulfide-isomerase A4 (EC 5.3.4.1) (Endoplasmic reticulum resident protein 72)	Pdia4	14	735311	660182	829821	910069	988067	1.12711e+06	940263	757312	741019	867318	973065	961316	966841	890315	1.22777e+06	1.53213e+06	1.43812e+06	1.54437e+06	1.48827e+06	MOUSE
Q6NS46	Protein RRP5 homolog (Apoptosis-linked gene 4 protein) (Programmed cell death protein 11)	Pdcd11	13	454070	416928	543554	645749	183068	187934	235416	491432	560812	567658	659406	309925	211777	258746	213162	344746	305031	388024	420557	MOUSE
Q8BML9	Glutamine--tRNA ligase (EC 6.1.1.18) (Glutaminyl-tRNA synthetase) (GlnRS)	Qars1	12	727129	703330	859340	960197	829857	880556	799218	721035	735057	781522	969885	894551	910042	725939	1.06936e+06	804692	762466	1.02707e+06	1078256	MOUSE
G3UVV4	Hexokinase (EC 2.7.1.1)	Hk1	12	832100	696398	952769	967217	1.0734e+06	1.08266e+06	1.13539e+06	747256	782123	879564	1.04552e+06	647585	678369	620176	863002	850862	826650	1.15007e+06	1.05494e+06	MOUSE
A2AVJ7	Ribosome-binding protein 1	Rrbp1	18	1.15682e+06	1.09136e+06	1.61819e+06	1.42794e+06	1.34459e+06	1.39051e+06	1.47003e+06	857017	960812	1.01877e+06	1026714	1.66536e+06	1.74978e+06	1524942	1842044	1.65136e+06	1.70114e+06	1.58947e+06	1.57993e+06	MOUSE
Q61768	Kinesin-1 heavy chain (Conventional kinesin heavy chain) (Ubiquitous kinesin heavy chain) (UKHC)	Kif5b	14	416277	383752	497701	618655	538853	454011	468770	397928	420589	460382	581767	434899	467832	384524	539192	394480	393900	519585	577991	MOUSE
P20029	Endoplasmic reticulum chaperone BiP (EC 3.6.4.10) (78 kDa glucose-regulated protein) (GRP-78) (Binding-immunoglobulin protein) (BiP) (Heat shock protein 70 family protein 5) (HSP70 family protein 5) (Heat shock protein family A member 5) (Immunoglobulin heavy chain-binding protein)	Hspa5	19	7.6525e+06	7.20419e+06	8935512	10354311	8519613	9304434	7599229	8.06813e+06	7.1896e+06	8702477	10202640	8231127	8851374	7499469	10444287	10787257	8744753	10017205	8981757	MOUSE
Q8CGK3	Lon protease homolog, mitochondrial (EC 3.4.21.53) (Lon protease-like protein) (LONP) (Mitochondrial ATP-dependent protease Lon) (Serine protease 15)	Lonp1	13	1.21627e+06	843141	1.29867e+06	1.50077e+06	1018866	796434	953556	1.43184e+06	1.23233e+06	1.68135e+06	2.00829e+06	988683	797226	956749	1.05444e+06	663500	642208	667548	695862	MOUSE
E9QK83	Small subunit processome component 20 homolog	Utp20	2	63555.6	51665.9	59859.8	86361.3	17068.9	18327.5	13740.6	64615.1	66198.5	88386.7	106837	17720.8	11258.7	11912.5	19893.5	27467.7	24990.4	7257.33	21407.6	MOUSE
O35379	Multidrug resistance-associated protein 1 (EC 7.6.2.2) (ATP-binding cassette sub-family C member 1) (Glutathione-S-conjugate-translocating ATPase ABCC1) (EC 7.6.2.3) (Leukotriene C(4) transporter) (LTC4 transporter)	Abcc1	3	63932.4	48848.7	59486.6	85102.9	65837.8	46398	53395.5	57716.3	59938.4	70580.1	79658.7	34679.4	26051.7	48398.2	57139.3	51918.4	35209.5	44754.5	43742.6	MOUSE
P80314	T-complex protein 1 subunit beta (TCP-1-beta) (CCT-beta)	Cct2	18	4.53847e+06	4217300	4.71802e+06	6.30188e+06	5276821	4.91271e+06	4628123	5.02633e+06	4.96188e+06	5.18716e+06	5.92085e+06	6.34803e+06	5433398	4.82092e+06	6.69937e+06	5.75913e+06	4.86775e+06	5.45551e+06	6.60165e+06	MOUSE
Q99KI0	Aconitate hydratase, mitochondrial (Aconitase) (EC 4.2.1.3) (Citrate hydro-lyase)	Aco2	16	1.93359e+06	1.6474e+06	2.21844e+06	2.48929e+06	2.4764e+06	2.24323e+06	2.12702e+06	2.1489e+06	1.8902e+06	2.34144e+06	2.60774e+06	2445740	1.89063e+06	2190390	2.43414e+06	3.23985e+06	2.66423e+06	2.7023e+06	2927500	MOUSE
Q9CWJ9	Bifunctional purine biosynthesis protein ATIC (AICAR transformylase/inosine monophosphate cyclohydrolase) (ATIC) [Includes: Phosphoribosylaminoimidazolecarboxamide formyltransferase (EC 2.1.2.3) (5-aminoimidazole-4-carboxamide ribonucleotide formyltransferase) (AICAR formyltransferase) (AICAR transformylase);IMP cyclohydrolase (EC 3.5.4.10) (IMP synthase) (Inosinicase)]	Atic	18	3.01054e+06	2.80479e+06	3.44916e+06	3694923	4174444	3.87919e+06	3.58052e+06	3.74914e+06	3.79297e+06	3.53596e+06	5128763	4413812	3.92777e+06	3.22078e+06	3.99286e+06	4360206	3.18129e+06	4.84862e+06	4.27823e+06	MOUSE
P17427	AP-2 complex subunit alpha-2 (100 kDa coated vesicle protein C) (Adaptor protein complex AP-2 subunit alpha-2) (Adaptor-related protein complex 2 subunit alpha-2) (Alpha-adaptin C) (Alpha2-adaptin) (Clathrin assembly protein complex 2 alpha-C large chain) (Plasma membrane adaptor HA2/AP2 adaptin alpha C subunit)	Ap2a2	11	391329	365016	505514	585148	539662	513863	577901	365103	375006	313073	372279	402820	435256	442004	606183	502252	432196	577757	541328	MOUSE
P25206	DNA replication licensing factor MCM3 (EC 3.6.4.12) (DNA polymerase alpha holoenzyme-associated protein P1) (P1-MCM3)	Mcm3	17	538841	690791	831481	1.1048e+06	1.0545e+06	1.04005e+06	1047908	818143	897835	968079	1.0246e+06	926177	867193	943984	1.10511e+06	1.60229e+06	1.49485e+06	1.50882e+06	1.79148e+06	MOUSE
E9Q450	Tropomyosin alpha-1 chain	Tpm1	5	1.44662e+06	1.47554e+06	1.56832e+06	1824559	1.07805e+06	1.61372e+06	946952	1.3503e+06	1.50059e+06	1.40378e+06	1.62995e+06	1.48278e+06	1.37153e+06	1.18837e+06	1526742	1.02851e+06	862013	962844	936521	MOUSE
P46935	E3 ubiquitin-protein ligase NEDD4 (EC 2.3.2.26) (HECT-type E3 ubiquitin transferase NEDD4) (Neural precursor cell expressed developmentally down-regulated protein 4) (NEDD-4)	Nedd4	15	1.39599e+06	1.27718e+06	1.66183e+06	2.03533e+06	1.61953e+06	1.45186e+06	1.46824e+06	1.33289e+06	1.39027e+06	1.51013e+06	1.7497e+06	1.37462e+06	1.34485e+06	1.238e+06	1.57891e+06	1.3821e+06	1.1436e+06	1.64942e+06	1669333	MOUSE
E9QAS5	DNA helicase (EC 3.6.4.12)	Chd4	11	477825	420302	586441	655864	256449	315616	410736	382185	487457	563256	628038	237828	319565	230056	287390	301172	383026	381322	324675	MOUSE
Q3TXS7	26S proteasome non-ATPase regulatory subunit 1 (26S proteasome regulatory subunit RPN2) (26S proteasome regulatory subunit S1)	Psmd1	14	921242	963119	1.13481e+06	1.45905e+06	1540890	1.28975e+06	1.28405e+06	1.12683e+06	1.04714e+06	1.17799e+06	1.26463e+06	1.2601e+06	1.22508e+06	1.1376e+06	1.51852e+06	1.43193e+06	1.27878e+06	1.67342e+06	1.71247e+06	MOUSE
O55029	Coatomer subunit beta' (Beta'-coat protein) (Beta'-COP) (p102)	Copb2	16	805572	702943	823624	1018695	1.02866e+06	889496	795108	785231	801800	810929	908186	907252	942259	664541	887047	902521	638190	1.07087e+06	916232	MOUSE
E9Q586	Dynactin subunit 1	Dctn1	12	790806	767738	898806	1.16249e+06	575068	874753	450689	379618	855026	882519	1.03656e+06	882464	316543	929286	1070554	472923	900451	1.16794e+06	1.12176e+06	MOUSE
Q9ER72	Cysteine--tRNA ligase, cytoplasmic (EC 6.1.1.16) (Cysteinyl-tRNA synthetase) (CysRS)	Cars1	12	622864	608876	840680	793786	579632	668920	697938	739017	810981	826177	963763	553523	571985	439400	738391	578418	506914	642391	661614	MOUSE
Q8JZQ9	Eukaryotic translation initiation factor 3 subunit B (eIF3b) (Eukaryotic translation initiation factor 3 subunit 9) (eIF-3-eta) (eIF3 p116)	Eif3b	18	1.13232e+06	1.0109e+06	1.30657e+06	1.5842e+06	1.15366e+06	1.21135e+06	1.23049e+06	1.11525e+06	1107426	1.0781e+06	1.42439e+06	1.26775e+06	1169541	1.03747e+06	1.38862e+06	1.39137e+06	1.27173e+06	1.72803e+06	1.68664e+06	MOUSE
P10107	Annexin A1 (Annexin I) (Annexin-1) (Calpactin II) (Calpactin-2) (Chromobindin-9) (Lipocortin I) (Phospholipase A2 inhibitory protein) (p35)	Anxa1	19	7.1727e+06	6.68887e+06	8785172	10635190	12553014	10950149	10906160	6617122	6.44817e+06	6.763e+06	7896211	9975314	8900103	8.14487e+06	10982026	8895623	7724968	9994721	10436456	MOUSE
Q5SV64	Myosin-10	Myh10	12	420173	365435	497051	593601	201025	195123	214176	200782	194769	238133	386717	342333	336988	332534	393045	237317	141257	248898	253956	MOUSE
Q3U962	Collagen alpha-2(V) chain	Col5a2	12	441242	487724	434044	728866	371224	406015	257324	338905	351702	303904	367406	746798	740801	696780	861501	441419	291680	412002	425350	MOUSE
P09103	Protein disulfide-isomerase (PDI) (EC 5.3.4.1) (Cellular thyroid hormone-binding protein) (Endoplasmic reticulum resident protein 59) (ER protein 59) (ERp59) (Prolyl 4-hydroxylase subunit beta) (p55)	P4hb	19	6.24444e+06	5535376	7.99887e+06	8368771	12216787	11437371	10553998	5451931	5798486	6.35791e+06	7.16973e+06	8073985	7.14073e+06	6977360	9310980	11269205	9549429	10696658	11172821	MOUSE
Q6P5D8	Structural maintenance of chromosomes flexible hinge domain-containing protein 1 (SMC hinge domain-containing protein 1) (EC 3.6.1.-)	Smchd1	8	146908	140109	187112	241456	301486	276924	230153	191621	171416	188874	227173	187375	170793	200530	205108	228684	262728	277015	266737	MOUSE
P27773	Protein disulfide-isomerase A3 (EC 5.3.4.1) (58 kDa glucose-regulated protein) (58 kDa microsomal protein) (p58) (Disulfide isomerase ER-60) (Endoplasmic reticulum resident protein 57) (ER protein 57) (ERp57) (Endoplasmic reticulum resident protein 60) (ER protein 60) (ERp60)	Pdia3	19	6355034	5.88163e+06	7450313	8753589	7821661	6.89118e+06	6.67066e+06	6.31571e+06	6005684	6759736	7.18076e+06	10552296	9332778	9344021	11794266	11470418	8923840	10341587	10509937	MOUSE
Q6P5F9	Exportin-1 (Exp1) (Chromosome region maintenance 1 protein homolog)	Xpo1	16	761196	623723	868936	995662	958181	670487	881834	848297	880680	962306	1.15623e+06	942627	781012	836160	1.02951e+06	894541	773867	1.03359e+06	1.06124e+06	MOUSE
P27612	Phospholipase A-2-activating protein (PLA2P) (PLAP)	Plaa	13	462097	464027	486659	680348	963941	1.12313e+06	943987	518975	537550	517149	587904	543176	473045	448846	658253	550944	496613	676514	692565	MOUSE
P11983	T-complex protein 1 subunit alpha (TCP-1-alpha) (CCT-alpha) (Tailless complex polypeptide 1A) (TCP-1-A) (Tailless complex polypeptide 1B) (TCP-1-B)	Tcp1	17	3074005	2.99658e+06	3.6347e+06	4.14618e+06	4.18114e+06	3433762	3.40571e+06	3.48671e+06	3.44839e+06	3.61999e+06	4.30855e+06	4482338	4.12771e+06	3716064	5.1109e+06	4462446	3.56217e+06	4.64878e+06	4.84634e+06	MOUSE
P21981	Protein-glutamine gamma-glutamyltransferase 2 (EC 2.3.2.13) (Isopeptidase TGM2) (EC 3.4.-.-) (Protein-glutamine deamidase TGM2) (EC 3.5.1.44) (Protein-glutamine dopaminyltransferase TGM2) (EC 2.3.1.-) (Protein-glutamine histaminyltransferase TGM2) (EC 2.3.1.-) (Protein-glutamine noradrenalinyltransferase TGM2) (EC 2.3.1.-) (Protein-glutamine serotonyltransferase TGM2) (EC 2.3.1.-) (Tissue transgl…	Tgm2	14	1.22517e+06	1.01717e+06	1.40835e+06	1.70533e+06	2.43016e+06	2.33104e+06	1953564	1.43306e+06	1.27404e+06	1497207	1.77087e+06	1.59109e+06	1.37313e+06	1.30804e+06	1.76203e+06	1.08623e+06	923904	1.17979e+06	1.3259e+06	MOUSE
Q8K224	RNA cytidine acetyltransferase (EC 2.3.1.-) (18S rRNA cytosine acetyltransferase) (N-acetyltransferase 10)	Nat10	7	255471	354369	360898	423690	313987	313014	264392	358649	383648	426441	458478	296006	427743	347802	475060	412061	390599	456811	463014	MOUSE
Q5SUR0	Phosphoribosylformylglycinamidine synthase (FGAM synthase) (FGAMS) (EC 6.3.5.3) (Formylglycinamide ribonucleotide amidotransferase) (FGAR amidotransferase) (FGAR-AT) (Formylglycinamide ribotide amidotransferase)	Pfas	14	762131	742417	987647	1.20829e+06	1.07362e+06	917388	903214	1028997	837593	977649	1.28305e+06	1.04449e+06	883475	772229	1.00752e+06	1.10771e+06	851105	1.13796e+06	1.10254e+06	MOUSE
Q60864	Stress-induced-phosphoprotein 1 (STI1) (mSTI1) (Hsc70/Hsp90-organizing protein) (Hop)	Stip1	16	2.22866e+06	2156632	2.44993e+06	3273390	2.59086e+06	2.53255e+06	2251377	2.76506e+06	2.55642e+06	2.69951e+06	3358888	2.68277e+06	2.35725e+06	2.17539e+06	2.87586e+06	2616046	2.11946e+06	2.74224e+06	2.97163e+06	MOUSE
Q9QZE5	Coatomer subunit gamma-1 (Gamma-1-coat protein) (Gamma-1-COP)	Copg1	12	399355	348250	410484	519490	524472	332927	441996	392854	331989	390507	479706	519084	434836	386759	564867	515922	475734	559399	573731	MOUSE
P17182	Alpha-enolase (EC 4.2.1.11) (2-phospho-D-glycerate hydro-lyase) (Enolase 1) (Non-neural enolase) (NNE)	Eno1	17	17099258	16399363	20132974	23512186	25210444	23080868	23633924	18020156	18828892	19705156	21615546	19368306	18486594	16599289	21401038	13299739	12872520	15762530	16450283	MOUSE
Q8VEK3	Heterogeneous nuclear ribonucleoprotein U (hnRNP U) (Scaffold-attachment factor A) (SAF-A)	Hnrnpu	15	3.07694e+06	2639596	3.43497e+06	4238961	3.97894e+06	3.73787e+06	3.50144e+06	3.20762e+06	3126607	3.32284e+06	4.03054e+06	4479917	3.90547e+06	3.76952e+06	4.88929e+06	5.41339e+06	4.22194e+06	4.66961e+06	4.99428e+06	MOUSE
P42932	T-complex protein 1 subunit theta (TCP-1-theta) (CCT-theta)	Cct8	19	3.86968e+06	4.3401e+06	5043705	6512287	5131212	5687791	4457084	4.88839e+06	5.08635e+06	5336030	6.49694e+06	6118675	5248967	4.998e+06	6.62219e+06	5.92832e+06	4788647	6078826	6.88547e+06	MOUSE
Q3THK7	GMP synthase [glutamine-hydrolyzing] (EC 6.3.5.2) (GMP synthetase) (Glutamine amidotransferase)	Gmps	13	675557	590520	735321	915034	800517	667751	723096	732368	778281	822556	964762	672966	614767	624187	818539	725408	690964	817413	893682	MOUSE
P49717	DNA replication licensing factor MCM4 (EC 3.6.4.12) (CDC21 homolog) (P1-CDC21)	Mcm4	16	738044	710941	852153	1.07308e+06	1049528	1.04174e+06	1.0125e+06	932180	955848	1.01827e+06	1.17214e+06	979290	1.01164e+06	888131	1.21916e+06	1.8172e+06	1.55562e+06	1.87423e+06	1891103	MOUSE
Q3T9X3	Dynamin GTPase (EC 3.6.5.5)	Dnm2	13	445042	376099	457549	578583	778546	668584	673797	457569	447055	505093	651446	440785	390812	371109	511760	421777	308756	470529	525777	MOUSE
Q8BL66	Early endosome antigen 1	Eea1	8	212229	80283.2	255032	282776	282240	333812	246384	105405	109842	181999	287648	232188	213791	184691	226747	205973	277025	118125	320745	MOUSE
E9QB02	Methionine--tRNA ligase, cytoplasmic (EC 6.1.1.10) (Methionyl-tRNA synthetase)	Mars1	12	803419	920824	1.13932e+06	1423426	922530	854144	931903	1.00557e+06	1.03758e+06	1.12806e+06	1.31888e+06	935544	1.05435e+06	928594	1.22565e+06	963412	841808	1086218	1.2094e+06	MOUSE
Q8BTI8	Serine/arginine repetitive matrix protein 2	Srrm2	13	628571	575384	794844	936585	962820	1.04335e+06	863162	668905	737734	755116	870657	967237	873392	781760	1.1206e+06	1.30388e+06	1.03668e+06	1.12067e+06	1.2064e+06	MOUSE
O35286	Pre-mRNA-splicing factor ATP-dependent RNA helicase DHX15 (EC 3.6.4.13) (DEAH box protein 15)	Dhx15	16	780753	915829	867157	1196623	1.65522e+06	1.26523e+06	1.17957e+06	758042	791388	810524	1.43356e+06	1.6677e+06	1.8291e+06	1.10249e+06	1.62736e+06	2.13834e+06	1.47762e+06	1.67045e+06	1.60213e+06	MOUSE
Q6GQT9	Nodal modulator 1	Nomo1	14	489428	430610	626533	715510	475661	450740	381642	503899	527579	571327	711158	567338	519673	519315	665165	681398	520072	578766	618401	MOUSE
Q91ZW3	SWI/SNF-related matrix-associated actin-dependent regulator of chromatin subfamily A member 5 (EC 3.6.4.-) (Sucrose nonfermenting protein 2 homolog) (mSnf2h)	Smarca5	12	448013	390406	503462	679119	414646	382233	435246	382844	431250	431547	584400	385574	373408	402975	372718	494947	492329	643286	607159	MOUSE
Q11011	Puromycin-sensitive aminopeptidase (PSA) (EC 3.4.11.14) (Cytosol alanyl aminopeptidase) (AAP-S)	Npepps	18	1.08418e+06	971048	1.12049e+06	1.47688e+06	1.45141e+06	1.61077e+06	1371749	987753	962275	998986	1.30879e+06	1.07522e+06	1.04673e+06	877652	1.43423e+06	1.57187e+06	1.36792e+06	1.67745e+06	2.05302e+06	MOUSE
Q05D44	Eukaryotic translation initiation factor 5B (eIF-5B) (EC 3.6.5.3) (Translation initiation factor IF-2)	Eif5b	6	231118	206355	279822	295030	145822	245747	319778	316621	332204	342329	400381	228005	230491	203261	219784	239442	250236	359993	297579	MOUSE
P97311	DNA replication licensing factor MCM6 (EC 3.6.4.12) (Mis5 homolog)	Mcm6	16	706221	643746	827129	993464	1.2545e+06	1.09776e+06	1218669	1.02075e+06	1.04293e+06	1.05238e+06	1.22901e+06	1.1728e+06	1.04395e+06	1.03497e+06	1.26917e+06	1.93245e+06	1.55069e+06	1.87588e+06	1.84982e+06	MOUSE
P14733	Lamin-B1	Lmnb1	13	549686	556576	699616	775817	967636	1.03823e+06	891810	571509	581557	642049	722481	947701	966479	829267	1.20858e+06	1.23919e+06	999528	1.05194e+06	1.02303e+06	MOUSE
A0A1B0GSX7	Nuclear pore complex protein Nup96 (Nuclear pore complex protein Nup98) (Nuclear pore complex protein Nup98-Nup96) (Nucleoporin Nup96) (Nucleoporin Nup98)	Nup98	9	172733	172330	199449	240706	259157	229279	197698	138443	183326	167397	188964	293479	282758	267464	342499	373493	262745	290328	318315	MOUSE
P28271	Cytoplasmic aconitate hydratase (Aconitase) (EC 4.2.1.3) (Citrate hydro-lyase) (Iron regulatory protein 1) (IRP1) (Iron-responsive element-binding protein 1) (IRE-BP 1)	Aco1	11	662605	613935	778734	975745	776538	679169	636724	663781	644692	712377	858707	746318	608309	634345	812518	588016	555933	710244	784640	MOUSE
A2A9M5	Dedicator of cytokinesis protein 7	Dock7	5	82664.1	78034.2	91384.3	92278.9	129953	113332	119703	79921.5	97991.3	61303.7	98609.3	99598.7	65829.5	92354.8	100138	107391	91762	99319.7	96896.6	MOUSE
E9PUD2	Dynamin-1-like protein (EC 3.6.5.5)	Dnm1l	16	841706	722713	982942	1.22309e+06	1065917	1.04585e+06	894241	818041	840660	989910	1.18068e+06	1096703	972456	900375	1.2453e+06	1.03932e+06	902412	1.19595e+06	1.24393e+06	MOUSE
A2A7S7	Tyrosine--tRNA ligase (EC 6.1.1.1) (Tyrosyl-tRNA synthetase)	Yars	14	975888	920525	1221026	1373046	1.22941e+06	1.26712e+06	1.10004e+06	956502	908526	1.27437e+06	1.46808e+06	787321	829968	799956	1.0958e+06	921329	803795	1.0308e+06	915786	MOUSE
P07901	Heat shock protein HSP 90-alpha (EC 3.6.4.10) (Heat shock 86 kDa) (HSP 86) (HSP86) (Tumor-specific transplantation 86 kDa antigen) (TSTA)	Hsp90aa1	16	5.97206e+06	6332118	5542484	8495112	6402478	7.32916e+06	4.64708e+06	4.6473e+06	6.93674e+06	6.91744e+06	7.83323e+06	5.4596e+06	7023093	4728822	8572174	4803790	6069233	7.56598e+06	5.34388e+06	MOUSE
Q8JZN2	Cold shock domain-containing protein E1 (Csde1 protein)	Csde1	10	432581	503686	636677	779577	460976	579537	529150	486112	591881	623285	614456	525376	462349	498626	683251	548902	542515	643780	807879	MOUSE
Q9CZN7	Serine hydroxymethyltransferase, mitochondrial (SHMT) (EC 2.1.2.1) (Glycine hydroxymethyltransferase) (Serine methylase)	Shmt2	19	6.16086e+06	5716121	7.19958e+06	8463504	5563258	5340953	4571453	6864980	6844786	7700665	8620904	7057536	6.21732e+06	6155716	8.26362e+06	7.40477e+06	6103317	6241762	6.96068e+06	MOUSE
A0A0R4J0V5	DNA-directed RNA polymerase subunit (EC 2.7.7.6)	Polr2a	8	212033	238160	285532	331421	209967	320518	181991	224165	259105	285455	289221	288060	285743	252313	324358	299670	273781	291812	243461	MOUSE
P09405	Nucleolin (Protein C23)	Ncl	19	11576429	11211753	13397400	16481889	12834356	12875424	11780676	15586947	16702098	17315752	20942944	16090826	14233355	13615907	17743044	19447390	16153603	17562724	18155572	MOUSE
P80316	T-complex protein 1 subunit epsilon (TCP-1-epsilon) (CCT-epsilon)	Cct5	18	2817912	2.76774e+06	3117143	3.71902e+06	3.29023e+06	3.30442e+06	2913113	3.14323e+06	3.32595e+06	3121256	3.85248e+06	3933383	3.53601e+06	3.26517e+06	4.48268e+06	3.74752e+06	3.08507e+06	4.24187e+06	3989707	MOUSE
Q9CQN1	Heat shock protein 75 kDa, mitochondrial (HSP 75) (TNFR-associated protein 1) (Tumor necrosis factor type 1 receptor-associated protein) (TRAP-1)	Trap1	15	1.48152e+06	1.26423e+06	1.6266e+06	1.97583e+06	1.54637e+06	1.38401e+06	1.08e+06	1.49511e+06	1.43475e+06	1650841	1.96037e+06	2.23657e+06	1.66359e+06	1.81895e+06	2.2107e+06	1.77615e+06	1.46139e+06	1.50363e+06	1.73837e+06	MOUSE
P70168	Importin subunit beta-1 (Karyopherin subunit beta-1) (Nuclear factor p97) (Pore targeting complex 97 kDa subunit) (PTAC97) (SCG)	Kpnb1	14	2462964	2366634	2753679	3391100	3.23156e+06	2.53407e+06	2.82617e+06	2.49522e+06	2.64081e+06	2.67963e+06	3.08506e+06	3.36262e+06	2.9539e+06	2.76547e+06	3.69109e+06	3.77562e+06	3.17914e+06	3.9896e+06	4276338	MOUSE
A0A0R4IZY0	Thimet oligopeptidase	Thop1	16	992361	861621	1.1087e+06	1.39855e+06	1.16901e+06	1.18644e+06	1.01994e+06	1.14792e+06	1.15875e+06	1.18012e+06	1.42391e+06	1.18482e+06	1.06134e+06	983066	1.27897e+06	1.27642e+06	1.07831e+06	1.32765e+06	1.36701e+06	MOUSE
P14873	Microtubule-associated protein 1B (MAP-1B) (MAP1(X)) (MAP1.2) [Cleaved into: MAP1B heavy chain;MAP1 light chain LC1]	Map1b	10	129084	163566	192468	201824	155484	127512	188491	200066	232967	239908	281109	105074	163502	141121	172709	131915	144068	170602	146985	MOUSE
Q6PB44	Tyrosine-protein phosphatase non-receptor type 23 (EC 3.1.3.48)	Ptpn23	11	326113	283630	366379	460162	434206	436533	371286	428378	300691	356206	446285	408389	300074	333281	403054	405433	400831	471866	408502	MOUSE
O88342	WD repeat-containing protein 1 (Actin-interacting protein 1) (AIP1)	Wdr1	14	1.30429e+06	1.29151e+06	1.54846e+06	1.8125e+06	1.55407e+06	1.71711e+06	1.46319e+06	1.39893e+06	1.2755e+06	1.33028e+06	1.5445e+06	1.46104e+06	1.44882e+06	1.25911e+06	1642610	1.26531e+06	1.22239e+06	1.51344e+06	1.56841e+06	MOUSE
Q9EQH3	Vacuolar protein sorting-associated protein 35 (Maternal-embryonic 3) (Vesicle protein sorting 35)	Vps35	14	1.00918e+06	869945	1.16581e+06	1.26863e+06	1.60422e+06	1.55994e+06	1.25683e+06	1.0079e+06	990595	1.09952e+06	1.30791e+06	1.20406e+06	1.06056e+06	1.16027e+06	1.51684e+06	1.16163e+06	1.06944e+06	1.37938e+06	1.16935e+06	MOUSE
Q9EPL8	Importin-7 (Imp7) (Ran-binding protein 7) (RanBP7)	Ipo7	11	465889	402550	530603	700927	506780	433227	447740	553790	513397	543564	689750	533016	452789	452734	586904	589387	415920	619532	622189	MOUSE
Q8R1B4	Eukaryotic translation initiation factor 3 subunit C (eIF3c) (Eukaryotic translation initiation factor 3 subunit 8) (eIF3 p110)	Eif3c	16	1.06697e+06	989128	1.26488e+06	1.57045e+06	1.35133e+06	1.23009e+06	1.15303e+06	1.1424e+06	1.21453e+06	1214529	1.37458e+06	1.23599e+06	1.16646e+06	1.01031e+06	1.44512e+06	1.33029e+06	1.12726e+06	1.55821e+06	1.62334e+06	MOUSE
Q61881	DNA replication licensing factor MCM7 (EC 3.6.4.12) (CDC47 homolog)	Mcm7	17	842652	1.17787e+06	1.43539e+06	1.29556e+06	1.60967e+06	1616988	1.42047e+06	1.24796e+06	1139908	1120701	2100172	1.50023e+06	1.35658e+06	1.20095e+06	1.43851e+06	2.92784e+06	1.7794e+06	2.72924e+06	2.41747e+06	MOUSE
Q60597	2-oxoglutarate dehydrogenase, mitochondrial (EC 1.2.4.2) (2-oxoglutarate dehydrogenase complex component E1) (OGDC-E1) (Alpha-ketoglutarate dehydrogenase)	Ogdh	10	427425	366809	510048	585267	597778	439668	494469	400435	339747	604041	453763	676409	566270	705536	655196	545822	586045	410418	545226	MOUSE
Q8BTS0	DEAD box protein 5 (EC 3.6.4.13) (Probable ATP-dependent RNA helicase DDX5)	Ddx5	11	1.46316e+06	1400773	1.64654e+06	2.01281e+06	1.64655e+06	1.88808e+06	1.64776e+06	1.43724e+06	1.54705e+06	1.56264e+06	1.8923e+06	1.556e+06	1.51186e+06	1.42413e+06	1.70903e+06	2464460	2.04995e+06	2.43469e+06	2.37052e+06	MOUSE
A0A3B2WCD8	Far upstream element-binding protein 2	Khsrp	18	1700483	1.43837e+06	1.80195e+06	2.4163e+06	2.52921e+06	2470036	2.30983e+06	2.15525e+06	2129793	2.37355e+06	2.64005e+06	2.08422e+06	1.97182e+06	1.85655e+06	2680186	2.74379e+06	2.29054e+06	2.75884e+06	2.82239e+06	MOUSE
F7DBB3	AHNAK nucleoprotein 2 (Fragment)	Ahnak2	6	162499	166395	184769	126424	338819	443130	393198	89022.7	96490.1	119237	187301	105094	168178	158519	139009	182044	229840	285249	287567	MOUSE
Q8K4Z5	Splicing factor 3A subunit 1 (SF3a120)	Sf3a1	16	641381	557430	674970	806772	928188	886629	853598	647146	668446	751639	851125	927914	842221	823819	1.07479e+06	1.15953e+06	924318	947465	991903	MOUSE
Q9JKR6	Hypoxia up-regulated protein 1 (GRP-170) (140 kDa Ca(2+)-binding protein) (CBP-140)	Hyou1	13	577892	455885	697471	841354	634257	450035	589558	594555	575434	697597	717052	562792	698069	710869	844398	670960	644744	851376	714533	MOUSE
Q9CU62	Structural maintenance of chromosomes protein 1A (SMC protein 1A) (SMC-1-alpha) (SMC-1A) (Chromosome segregation protein SmcB) (Sb1.8)	Smc1a	6	122017	178052	185802	239770	133448	142845	180445	155457	159003	145993	162218	155573	153173	137459	192644	209288	216730	204164	199171	MOUSE
Q61553	Fascin (Singed-like protein)	Fscn1	17	2259261	2264508	2.73645e+06	3.55857e+06	2.33445e+06	2.19635e+06	1.88304e+06	2.33264e+06	2.58267e+06	2.4701e+06	3.09004e+06	3222515	3.10076e+06	2.80475e+06	3.89341e+06	2.55791e+06	2.29801e+06	3.15985e+06	3382304	MOUSE
P07356	Annexin A2 (Annexin II) (Annexin-2) (Calpactin I heavy chain) (Calpactin-1 heavy chain) (Chromobindin-8) (Lipocortin II) (Placental anticoagulant protein IV) (PAP-IV) (Protein I) (p36)	Anxa2	20	7882392	7.08167e+06	8671777	10696996	16293866	13700882	14241865	7.65501e+06	7211100	7.77117e+06	9268806	8601902	7994004	7414620	9658135	10405417	9002332	11422487	11756519	MOUSE
Q8BMS1	Trifunctional enzyme subunit alpha, mitochondrial (Monolysocardiolipin acyltransferase) (EC 2.3.1.-) (TP-alpha) [Includes: Long-chain enoyl-CoA hydratase (EC 4.2.1.17);Long chain 3-hydroxyacyl-CoA dehydrogenase (EC 1.1.1.211)]	Hadha	18	1.80631e+06	1.43988e+06	2.0882e+06	2341617	2.00445e+06	1.49025e+06	1.93102e+06	1.59708e+06	1.45469e+06	1.80702e+06	2.01388e+06	2.11054e+06	1.67925e+06	1.96707e+06	2.06158e+06	2.40683e+06	2.29296e+06	2.40539e+06	2.52235e+06	MOUSE
F8VPX1	Ubiquitin carboxyl-terminal hydrolase 7 (EC 3.4.19.12) (Ubiquitin thioesterase 7) (Ubiquitin-specific-processing protease 7)	Usp7	9	201029	213028	296846	342780	246693	201272	303923	306078	317436	378315	399949	317568	371092	365186	371408	511625	359058	441072	503629	MOUSE
A0A2R8VHH1	Nuclear pore complex protein Nup155	Nup155	16	469344	410293	573009	658856	525964	578086	534149	424162	345565	401149	537661	569498	517112	524618	541440	966337	600378	818964	785170	MOUSE
Q61699	Heat shock protein 105 kDa (42 degrees C-HSP) (Heat shock 110 kDa protein) (Heat shock-related 100 kDa protein E7I) (HSP-E7I)	Hsph1	16	994337	1.10999e+06	1.18793e+06	1647860	975986	892272	540298	1.08145e+06	1.01307e+06	1.06177e+06	1.09397e+06	1.45505e+06	1.18935e+06	1.3301e+06	1.59367e+06	1.53676e+06	1.32111e+06	1803859	1.88035e+06	MOUSE
P13020	Gelsolin (Actin-depolymerizing factor) (ADF) (Brevin)	Gsn	16	1.63106e+06	1.50115e+06	1.70881e+06	2.23523e+06	2.7161e+06	2.53174e+06	2.49085e+06	1.52939e+06	1.39252e+06	1540346	1.72817e+06	2.06835e+06	1.97256e+06	1.75258e+06	2.35571e+06	2.42806e+06	2.05491e+06	2573757	2.69423e+06	MOUSE
Q1HFZ0	RNA cytosine C(5)-methyltransferase NSUN2 (EC 2.1.1.-) (Myc-induced SUN domain-containing protein) (Misu) (NOL1/NOP2/Sun domain family member 2) (mRNA cytosine C(5)-methyltransferase) (EC 2.1.1.-) (tRNA cytosine C(5)-methyltransferase) (EC 2.1.1.-) (EC 2.1.1.203)	Nsun2	14	881658	901550	1.05379e+06	1.30286e+06	801625	946067	875515	1.02438e+06	1122877	1.20071e+06	1.33204e+06	971536	983902	883443	1.21734e+06	970839	905269	1.19645e+06	1.1255e+06	MOUSE
E9PWE8	Dihydropyrimidinase-related protein 3	Dpysl3	16	2.19013e+06	2.04832e+06	2.42195e+06	3.00295e+06	2.92715e+06	3.14379e+06	2533876	2.23493e+06	2.20908e+06	2524198	2.90613e+06	2.33707e+06	2291245	2.00564e+06	2.61135e+06	1.72199e+06	1.51528e+06	2.00831e+06	2.11215e+06	MOUSE
P80313	T-complex protein 1 subunit eta (TCP-1-eta) (CCT-eta)	Cct7	17	2356110	2.06538e+06	2791086	3.19131e+06	2.88319e+06	2.41698e+06	2567002	2.42094e+06	2.55035e+06	2.68784e+06	3.01016e+06	3.12923e+06	3.1147e+06	2.68819e+06	3764659	2868222	2.70174e+06	3.42547e+06	3.23232e+06	MOUSE
O88207	Collagen alpha-1(V) chain	Col5a1	10	305339	321737	381904	455254	245894	230983	211708	235129	166032	205226	282245	518777	560452	515804	637400	316199	269572	363199	258473	MOUSE
P09411	Phosphoglycerate kinase 1 (EC 2.7.2.3)	Pgk1	16	5.9458e+06	5844659	6.58003e+06	8189179	8.06229e+06	8.34956e+06	7.29914e+06	6.86718e+06	7325903	7066859	8.23781e+06	7937970	7898739	6737166	9335924	6.54594e+06	6.35015e+06	7775571	7912086	MOUSE
A0A1B0GSX0	L-lactate dehydrogenase (EC 1.1.1.27)	Ldha	16	4.79141e+06	4331009	5517676	6462692	7817407	4.99676e+06	6365710	4928918	5543722	5506092	6248177	6721109	5825776	5161176	6.80544e+06	6.28212e+06	5564101	6423616	7062441	MOUSE
A6ZI44	Fructose-bisphosphate aldolase (EC 4.1.2.13)	Aldoa	15	3.97187e+06	3.81321e+06	4.43869e+06	5.80232e+06	6978624	7.02642e+06	5947285	4.42313e+06	4.67045e+06	4.46258e+06	5352155	5533759	4915367	4409636	6.22248e+06	4.62277e+06	4.07183e+06	5.6232e+06	5.665e+06	MOUSE
Q921K2	Poly [ADP-ribose] polymerase (EC 2.4.2.30)	Parp1	11	714272	661572	761761	941955	405099	331593	459067	664875	693869	776800	858838	464977	458716	362272	514174	399568	348194	561870	574094	MOUSE
Q3U4W8	Ubiquitin carboxyl-terminal hydrolase (EC 3.4.19.12)	Usp5	16	1.35862e+06	985648	1381436	1.82933e+06	2.30632e+06	2015109	1.75084e+06	1.74888e+06	1.4557e+06	1.77559e+06	1985303	1.7787e+06	1.69592e+06	1.47326e+06	2.1074e+06	2.20609e+06	1682067	2.19184e+06	2.49624e+06	MOUSE
P10126	Elongation factor 1-alpha 1 (EF-1-alpha-1) (Elongation factor Tu) (EF-Tu) (Eukaryotic elongation factor 1 A-1) (eEF1A-1)	Eef1a1	11	14665190	14178801	16500788	18313458	14878880	13919913	16015487	15136893	15274143	15730956	16793092	13822945	14311532	12190127	15967102	15698117	15244652	19118876	18298832	MOUSE
Q7TQD7	Myo1b protein (Unconventional myosin-Ib)	Myo1b	10	240761	250462	345861	496710	517169	452386	437032	347589	322586	410211	531408	381946	361257	301389	376035	578402	414745	537390	568689	MOUSE
H9KV00	Protein SON	Son	8	223315	221922	245306	304012	294561	270650	265741	208286	216384	236025	271920	312795	348538	290141	410109	387385	375511	392663	424228	MOUSE
E9QLA5	Inverted formin-2	Inf2	12	289076	242692	340879	455518	819928	454387	552567	260620	323860	307765	411537	311084	341888	421074	518129	629058	606486	510955	543376	MOUSE
Q9WVK4	EH domain-containing protein 1 (PAST homolog 1) (mPAST1)	Ehd1	14	639732	594403	741382	985079	1219315	1.13408e+06	1.20017e+06	853214	997000	1.05769e+06	979999	892482	818607	791629	1173430	918971	789176	1.00206e+06	1.04832e+06	MOUSE
P26231	Catenin alpha-1 (102 kDa cadherin-associated protein) (Alpha E-catenin) (CAP102)	Ctnna1	8	227481	228410	325775	270824	395282	377218	385190	231878	200736	244379	486458	246252	432787	237642	321732	236809	357058	245744	296685	MOUSE
Q922B2	Aspartate--tRNA ligase, cytoplasmic (EC 6.1.1.12) (Aspartyl-tRNA synthetase) (AspRS)	Dars1	19	2116799	1.58802e+06	2615211	3.05595e+06	2.32514e+06	3.21116e+06	2.87784e+06	2.34624e+06	2386262	2.76244e+06	2998889	2.57727e+06	2.64179e+06	2.24783e+06	2.49949e+06	2.65351e+06	1.78598e+06	3.24015e+06	3.44194e+06	MOUSE
Q8K310	Matrin-3	Matr3	13	855614	740931	990286	1.18042e+06	1.11625e+06	894442	1.18693e+06	825538	875645	950195	1.05043e+06	1.28403e+06	1.361e+06	1.1713e+06	1.65163e+06	1.79151e+06	1.56518e+06	1629532	1.57464e+06	MOUSE
Q61191	Host cell factor 1 (HCF) (HCF-1) (C1 factor) [Cleaved into: HCF N-terminal chain 1;HCF N-terminal chain 2;HCF N-terminal chain 3;HCF N-terminal chain 4;HCF N-terminal chain 5;HCF N-terminal chain 6;HCF C-terminal chain 1;HCF C-terminal chain 2;HCF C-terminal chain 3;HCF C-terminal chain 4;HCF C-terminal chain 5;HCF C-terminal chain 6]	Hcfc1	15	522922	459712	553578	699188	773263	703601	593123	497475	498536	540063	607633	708648	650144	664779	861309	900085	781005	821764	848912	MOUSE
Q61391	Neprilysin (EC 3.4.24.11) (Atriopeptidase) (Enkephalinase) (Neutral endopeptidase 24.11) (NEP) (Neutral endopeptidase) (Skin fibroblast elastase) (SFE) (CD antigen CD10)	Mme	12	732769	359064	745727	664647	596649	506818	713905	352832	267907	521275	559548	808484	634437	740736	852575	906558	822479	868953	615175	MOUSE
O35639	Annexin A3 (35-alpha calcimedin) (Annexin III) (Annexin-3) (Lipocortin III) (Placental anticoagulant protein III) (PAP-III)	Anxa3	14	1.79101e+06	2689809	3.15548e+06	4.14875e+06	3.53412e+06	3530054	2.78505e+06	2.77016e+06	2.68484e+06	2.84902e+06	3.29438e+06	2.44578e+06	2.90749e+06	2.65581e+06	3.68048e+06	1.70959e+06	2.22819e+06	2.94773e+06	2.79885e+06	MOUSE
Q9CZD3	Glycine--tRNA ligase (EC 6.1.1.14) (Diadenosine tetraphosphate synthetase) (Ap4A synthetase) (EC 2.7.7.-) (Glycyl-tRNA synthetase 1) (GlyRS)	Gars1	14	1.78238e+06	1.73053e+06	2.15404e+06	2.65369e+06	2.56597e+06	2.56939e+06	2.30667e+06	2808838	2.7785e+06	2985540	3322540	2.43927e+06	2.16905e+06	1.94488e+06	2.63891e+06	2134135	1.89071e+06	2.31516e+06	2.25664e+06	MOUSE
D3Z4J3	Unconventional myosin-Va	Myo5a	12	207941	192651	233858	261082	309755	256010	257468	227063	239424	271904	264954	289862	237186	263508	291529	293017	245931	324509	345185	MOUSE
P56480	ATP synthase subunit beta, mitochondrial (EC 7.1.2.2) (ATP synthase F1 subunit beta)	Atp5f1b	19	10759810	9130282	12263518	14085220	14576226	11620593	11033150	10769433	10259549	11931382	13813591	16010222	11687023	13411868	15964774	14747479	12385071	12055627	14270003	MOUSE
P99024	Tubulin beta-5 chain	Tubb5	6	7426499	6953221	8707810	10060764	10352488	8391040	5.87958e+06	9046110	8497690	9164175	10374589	9261642	8.22594e+06	7.81997e+06	10204290	8479531	7521948	9761850	10619975	MOUSE
H3BKH9	Guanine nucleotide exchange factor H1 (Rho guanine nucleotide exchange factor 2)	Arhgef2	13	633854	622808	733505	871134	491185	563787	556174	805024	863497	921817	1.10375e+06	465482	513319	500758	535481	393949	333944	511148	990991	MOUSE
Q91YQ5	Dolichyl-diphosphooligosaccharide--protein glycosyltransferase subunit 1 (Dolichyl-diphosphooligosaccharide--protein glycosyltransferase 67 kDa subunit) (Ribophorin I) (RPN-I) (Ribophorin-1)	Rpn1	17	2.14455e+06	1.96954e+06	2.16886e+06	2.64766e+06	1.01624e+06	1.18001e+06	947120	1.74751e+06	1.95806e+06	2.40053e+06	2.5994e+06	1.2877e+06	1.33204e+06	1.44394e+06	1.28462e+06	1.20221e+06	1.16836e+06	1.57719e+06	887670	MOUSE
Q62383	Transcription elongation factor SPT6	Supt6h	4	65276.6	63094.7	76800.5	157562	89561.1	103631	91254	64612.5	61241.9	58196.9	91789.3	103416	75550.2	57077.8	183077	182735	87666.6	161023	127172	MOUSE
E9QN70	Laminin subunit beta-1	Lamb1	7	197700	185438	260251	347927	294495	193061	224844	183849	185621	219610	296869	323618	291295	283399	376437	282793	243848	277296	271385	MOUSE
P48036	Annexin A5 (Anchorin CII) (Annexin V) (Annexin-5) (Calphobindin I) (CBP-I) (Endonexin II) (Lipocortin V) (Placental anticoagulant protein 4) (PP4) (Placental anticoagulant protein I) (PAP-I) (Thromboplastin inhibitor) (Vascular anticoagulant-alpha) (VAC-alpha)	Anxa5	18	6603797	4.78861e+06	6.43928e+06	7.44359e+06	9160431	8591384	8407666	6.29388e+06	5.91647e+06	6839450	7952532	6071890	5020219	4.7623e+06	6413616	5436419	4.96198e+06	5872706	6068447	MOUSE
P49718	DNA replication licensing factor MCM5 (EC 3.6.4.12) (CDC46 homolog) (P1-CDC46)	Mcm5	14	884685	900518	1.00052e+06	1.37959e+06	1097547	1.07284e+06	1.15271e+06	1.11562e+06	1.20932e+06	1.23065e+06	1.56687e+06	995054	960120	858606	1048608	1.51519e+06	1392557	1.85917e+06	1.83692e+06	MOUSE
Q9JJ28	Protein flightless-1 homolog	Flii	9	326551	236130	358486	449615	282995	258921	309845	328853	317686	314422	379241	146863	236766	218809	215696	194990	219797	301524	297982	MOUSE
G5E8R3	Pyruvate carboxylase (EC 6.4.1.1)	Pcx	15	365634	285540	415384	442369	553875	467372	350183	309126	314396	353548	306936	481913	442300	457674	556784	613179	503958	578883	618792	MOUSE
G3X8Y3	N-alpha-acetyltransferase 15, NatA auxiliary subunit	Naa15	9	475847	475966	590528	702628	513897	538689	481281	591501	596525	652805	777849	409398	470918	361516	492406	427409	411974	530561	586295	MOUSE
Q76MZ3	Serine/threonine-protein phosphatase 2A 65 kDa regulatory subunit A alpha isoform (PP2A subunit A isoform PR65-alpha) (PP2A subunit A isoform R1-alpha)	Ppp2r1a	12	945789	1.1169e+06	1.09722e+06	1.55328e+06	1.50553e+06	1.10762e+06	1.09777e+06	1048611	876483	1.35446e+06	1.17512e+06	1414505	1010260	976514	1.2747e+06	1.42728e+06	947883	1.24213e+06	1.26932e+06	MOUSE
Q03265	ATP synthase subunit alpha, mitochondrial (ATP synthase F1 subunit alpha)	Atp5f1a	17	6898359	6109340	7.69975e+06	9531347	10272097	8571530	7.69716e+06	7.23327e+06	6546975	7.86814e+06	9187796	10030568	8.13603e+06	8586484	10751773	10976238	8509401	8728888	9474528	MOUSE
S4R2J9	Protein PRRC2C	Prrc2c	8	183273	208296	227004	279264	155868	202888	187118	171038	190831	181348	240893	166182	208784	164186	265238	185685	218179	237723	212988	MOUSE
P60843	Eukaryotic initiation factor 4A-I (eIF-4A-I) (eIF4A-I) (EC 3.6.4.13) (ATP-dependent RNA helicase eIF4A-1)	Eif4a1	11	2571444	2598590	2.9372e+06	3.50873e+06	3.08761e+06	3.21267e+06	2.47867e+06	2.61021e+06	2.70033e+06	2.78611e+06	3.25498e+06	3.11881e+06	2.84245e+06	2.48326e+06	3.4704e+06	3.19679e+06	2829468	3389473	3.55867e+06	MOUSE
A0A0A0MQF6	Glyceraldehyde-3-phosphate dehydrogenase (EC 1.2.1.12)	Gapdh	2	762231	704723	982688	1.17485e+06	1523028	1.9258e+06	1.2599e+06	1114062	1.26718e+06	940292	1.41619e+06	1.47585e+06	1.20047e+06	1.13438e+06	1.85669e+06	1.23203e+06	961732	1.29784e+06	1.32092e+06	MOUSE
D3Z061	E1 ubiquitin-activating enzyme (EC 6.2.1.45)	Uba6	7	141808	150636	170573	262311	220240	217346	196234	182289	168997	179652	226642	171720	166731	170810	190131	161851	158177	187344	201219	MOUSE
Q9D8N0	Elongation factor 1-gamma (EF-1-gamma) (eEF-1B gamma)	Eef1g	16	3.28156e+06	2.96468e+06	3.76142e+06	4394849	5488446	5.0802e+06	4.50152e+06	4.3222e+06	4379777	4.56666e+06	5.07698e+06	5.45501e+06	4855744	4322559	5919984	4.42746e+06	4002073	5.26205e+06	5.25581e+06	MOUSE
Q60715	Prolyl 4-hydroxylase subunit alpha-1 (4-PH alpha-1) (EC 1.14.11.2) (Procollagen-proline,2-oxoglutarate-4-dioxygenase subunit alpha-1)	P4ha1	19	1.69495e+06	1.37066e+06	1.89973e+06	1.9538e+06	2.24374e+06	1.97855e+06	1.97596e+06	1.36973e+06	1.22677e+06	1402832	1.64878e+06	2.12298e+06	2.16059e+06	1.94215e+06	2413113	2.11009e+06	1.89613e+06	2.07238e+06	1947675	MOUSE
O54988	STE20-like serine/threonine-protein kinase (STE20-like kinase) (mSLK) (EC 2.7.11.1) (Etk4) (STE20-related kinase SMAK) (STE20-related serine/threonine-protein kinase) (STE20-related kinase) (Serine/threonine-protein kinase 2)	Slk	5	119936	122050	131987	164874	144125	158686	172014	108575	115554	136353	163964	106931	120009	100997	146911	133468	134698	168691	150560	MOUSE
P40142	Transketolase (TK) (EC 2.2.1.1) (P68)	Tkt	16	1.73735e+06	1.50038e+06	1.81547e+06	2.35326e+06	2187472	1.87969e+06	1.99695e+06	2196953	2.05593e+06	2.23817e+06	2.57596e+06	1827016	1.58538e+06	1.40241e+06	1.88773e+06	1.37217e+06	1.23063e+06	1501857	1.54434e+06	MOUSE
E9Q2H1	E3 ubiquitin-protein ligase UBR5	Ubr5	3	43979	37693.1	105612	62691.7	59720.2	104714	119838	53382.9	51555.4	66669.3	38430.2	113524	66832.1	72920.8	137747	124185	93772.5	145158	154272	MOUSE
G3XA17	Eukaryotic translation initiation factor 4 gamma 2	Eif4g2	15	567274	571504	561878	759250	759627	768499	629021	622678	689771	729700	851152	593746	663579	550639	752755	644787	602173	727655	770876	MOUSE
O88569	Heterogeneous nuclear ribonucleoproteins A2/B1 (hnRNP A2/B1)	Hnrnpa2b1	13	4322144	4.06848e+06	5098515	5.66129e+06	6741404	5966705	6170883	5072897	4.87349e+06	5438804	5.8226e+06	6.31081e+06	6.0456e+06	5603135	7.44314e+06	9730384	8.22788e+06	8521287	8844212	MOUSE
P24527	Leukotriene A-4 hydrolase (LTA-4 hydrolase) (EC 3.3.2.6) (Leukotriene A(4) hydrolase) (Tripeptide aminopeptidase LTA4H) (EC 3.4.11.4)	Lta4h	15	902031	722007	930381	1.03315e+06	1.10672e+06	1.29642e+06	727997	791611	899495	959044	1068153	950352	970158	692293	1.09536e+06	870070	754626	927155	864059	MOUSE
P63260	Actin, cytoplasmic 2 (Gamma-actin) [Cleaved into: Actin, cytoplasmic 2, N-terminally processed]	Actg1	8	20608214	20382182	22613752	24242006	23917672	22871724	22809650	19735820	20101966	21058944	21530444	22890250	23584702	21132400	26638138	23296234	20695418	23470084	25758336	MOUSE
A0A0R4J259	Heterogeneous nuclear ribonucleoprotein Q	Syncrip	8	1.11601e+06	935931	1.23992e+06	1567682	909698	775126	1.03543e+06	1.14361e+06	1.10621e+06	1.22032e+06	1.52956e+06	797295	960493	812271	1.02918e+06	959028	937359	1.20551e+06	1.20378e+06	MOUSE
Q9WVJ2	26S proteasome non-ATPase regulatory subunit 13 (26S proteasome regulatory subunit RPN9) (26S proteasome regulatory subunit S11) (26S proteasome regulatory subunit p40.5)	Psmd13	16	957258	886149	1.4861e+06	1.31479e+06	1.53928e+06	1.34496e+06	1.13824e+06	954667	957893	939587	1.2276e+06	1.35811e+06	1.15458e+06	1097985	1.51536e+06	2.01183e+06	1.33547e+06	1.97228e+06	1.86246e+06	MOUSE
G5E829	Plasma membrane calcium-transporting ATPase 1 (EC 7.2.2.10) (Plasma membrane calcium ATPase isoform 1) (PMCA1) (Plasma membrane calcium pump isoform 1)	Atp2b1	5	144656	93339.8	145600	194120	152467	157417	179612	118832	120205	166631	176632	143853	107906	152416	148841	178042	192190	201167	124661	MOUSE
E9Q634	Unconventional myosin-Ie (Unconventional myosin 1E)	Myo1e	8	268371	326796	461502	385325	331819	528129	557990	356868	326249	467038	391658	440242	366414	363443	447237	384487	246797	414890	312906	MOUSE
Q8BJ71	Nuclear pore complex protein Nup93 (93 kDa nucleoporin) (CBP-interacting protein 4) (Nucleoporin Nup93)	Nup93	11	466638	415816	495240	582480	655508	672143	629768	480482	392521	476735	570265	580270	695069	515257	701567	933415	702552	710491	805980	MOUSE
P29341	Polyadenylate-binding protein 1 (PABP-1) (Poly(A)-binding protein 1)	Pabpc1	14	2.85988e+06	2.7694e+06	3.42963e+06	4263608	3.44084e+06	3656477	2.90904e+06	2.93874e+06	3138955	3151465	3910096	3.47051e+06	3.03109e+06	2.72808e+06	3.63118e+06	3.51638e+06	3017199	4145043	4312748	MOUSE
P35564	Calnexin	Canx	12	1.27593e+06	1.211e+06	1.31991e+06	1.56956e+06	395106	558363	503634	948851	1081593	1378271	1.47823e+06	483076	584864	669705	488859	472710	581644	813904	343442	MOUSE
E9PW39	RNA helicase (EC 3.6.4.13)	Mov10	5	69902.7	80605.3	89554.5	106711	84287.9	75998.1	108597	104749	77935	102455	128019	124020	131065	115069	124870	116028	90328.6	143367	141718	MOUSE
Q8BVQ9	26S proteasome AAA-ATPase subunit RPT1 (26S proteasome regulatory subunit 7) (Proteasome 26S subunit ATPase 2)	Psmc2	13	813685	788787	856277	1165242	1.14546e+06	1.16613e+06	994519	887089	941245	840693	1.14359e+06	954026	979645	773336	1.15765e+06	1.17427e+06	978216	1.2078e+06	1.1369e+06	MOUSE
E9Q718	Procollagen-lysine 5-dioxygenase (EC 1.14.11.4)	Plod2	16	654995	541796	768707	938780	969139	727744	773424	442027	432642	574847	641858	1.20598e+06	1.08232e+06	933128	1.28135e+06	1.17585e+06	937920	1.0917e+06	1119395	MOUSE
Q61584	Fragile X mental retardation syndrome-related protein 1 (mFxr1p)	Fxr1	7	227278	192244	201676	277143	267569	214789	236047	227221	230429	248154	286955	213557	235718	167322	237248	255707	222414	288183	305005	MOUSE
E9QAE3	B-TFIID TATA-box-binding protein-associated factor 1	Btaf1	4	62447.6	286553	74670.5	63043.2	258408	72367.8	72056.9	264963	284502	257107	60587.1	277352	74061.5	64724.6	81916.5	81957.9	76461.9	180849	63491.7	MOUSE
P80315	T-complex protein 1 subunit delta (TCP-1-delta) (A45) (CCT-delta)	Cct4	12	2329105	2.17859e+06	2.72059e+06	3.65143e+06	3320786	2.91101e+06	2637531	2614330	2692941	2.81757e+06	3.4162e+06	3594554	3.10236e+06	2.83335e+06	3.93249e+06	3383880	2.69689e+06	3.48161e+06	3.77462e+06	MOUSE
A0A1L1SV73	Ubiquitin carboxyl-terminal hydrolase 47	Usp47	11	187080	146796	232247	306582	164069	276255	166846	179440	141196	171676	203922	235703	227515	269018	413205	176105	256287	238542	371326	MOUSE
G5E896	Enhancer of mRNA-decapping protein 4	Edc4	11	347710	395101	433282	526457	494253	450319	455225	346094	427913	370593	469219	442894	460613	398971	501062	526478	481095	643786	615951	MOUSE
Q9ET54	Palladin	Palld	9	477500	440518	587297	683973	188291	388969	314597	434923	403945	493170	483026	571831	583569	464354	690534	339622	287962	438834	473789	MOUSE
Q8BG32	26S proteasome non-ATPase regulatory subunit 11 (26S proteasome regulatory subunit RPN6) (26S proteasome regulatory subunit S9) (26S proteasome regulatory subunit p44.5)	Psmd11	13	1.01155e+06	910814	1.09207e+06	1.39504e+06	1.36604e+06	1.27348e+06	1070809	975411	960582	995153	1.28236e+06	1.27472e+06	1.1191e+06	1.05826e+06	1.39414e+06	1.53549e+06	1.25185e+06	1.57298e+06	1.69625e+06	MOUSE
Q99K01	Pyridoxal-dependent decarboxylase domain-containing protein 1 (EC 4.1.1.-)	Pdxdc1	11	329364	269646	353531	411535	461399	385730	365562	277486	193332	395164	415298	486195	439934	418009	408285	420562	367759	467684	498977	MOUSE
Q8BH59	Calcium-binding mitochondrial carrier protein Aralar1 (Mitochondrial aspartate glutamate carrier 1) (Solute carrier family 25 member 12)	Slc25a12	13	523364	452106	549482	675800	684777	575183	322098	442829	477078	561194	608858	859011	622659	752712	893662	676408	429367	449657	755555	MOUSE
Q569Z5	Probable ATP-dependent RNA helicase DDX46 (EC 3.6.4.13) (DEAD box protein 46)	Ddx46	10	442876	453894	567001	657602	670483	660475	647033	520888	457919	530775	541744	653654	601670	453552	743689	824909	676652	740641	786044	MOUSE
B2RXS4	Plexin-B2	Plxnb2	10	200298	234263	251434	306586	347975	329833	330338	189092	221863	211233	265168	410475	279880	286576	383042	454953	292126	294861	374226	MOUSE
Q8CG47	Structural maintenance of chromosomes protein 4 (SMC protein 4) (SMC-4) (Chromosome-associated polypeptide C) (XCAP-C homolog)	Smc4	6	148212	186126	215226	249105	170590	204160	210224	173870	177911	184868	163010	123548	182861	165715	209536	132097	231468	241432	247082	MOUSE
Q9DCL9	Multifunctional protein ADE2 [Includes: Phosphoribosylaminoimidazole-succinocarboxamide synthase (EC 6.3.2.6) (SAICAR synthetase);Phosphoribosylaminoimidazole carboxylase (EC 4.1.1.21) (AIR carboxylase) (AIRC)]	Paics	17	1.41923e+06	1.23206e+06	1.62228e+06	2.00874e+06	2.14101e+06	1.86882e+06	1.69407e+06	1.55095e+06	1.5841e+06	1.51126e+06	1.89817e+06	2.03994e+06	1.88136e+06	1.76411e+06	2.36535e+06	2.23387e+06	1.93859e+06	2.54368e+06	2.48514e+06	MOUSE
Q9WTM5	RuvB-like 2 (EC 3.6.4.12) (p47 protein)	Ruvbl2	16	1.09457e+06	1058836	1.43498e+06	1.79337e+06	1759332	1.89054e+06	1.48435e+06	1.53269e+06	1.43148e+06	1.5924e+06	1.95378e+06	1.84425e+06	1.62392e+06	1.50665e+06	2158775	2.08604e+06	1.80492e+06	1.99131e+06	2.1897e+06	MOUSE
Q64521	Glycerol-3-phosphate dehydrogenase, mitochondrial (GPD-M) (GPDH-M) (EC 1.1.5.3) (Protein TISP38)	Gpd2	9	398297	320572	421796	518784	734340	606499	612284	448039	410285	489710	582089	788410	653353	671983	820317	779707	580491	644787	642477	MOUSE
O08529	Calpain-2 catalytic subunit (EC 3.4.22.53) (80 kDa M-calpain subunit) (CALP80) (Calcium-activated neutral proteinase 2) (CANP 2) (Calpain M-type) (Calpain-2 large subunit) (Millimolar-calpain) (M-calpain)	Capn2	10	343121	340878	436265	437063	523301	508893	452123	374232	351283	310475	436055	401950	369863	326772	453558	267973	272446	383841	385804	MOUSE
P97310	DNA replication licensing factor MCM2 (EC 3.6.4.12) (Minichromosome maintenance protein 2 homolog) (Nuclear protein BM28)	Mcm2	17	1.01383e+06	956992	994500	1106797	1.2925e+06	1.16469e+06	1.30229e+06	1.17437e+06	1.27706e+06	1.32251e+06	1.60149e+06	1.16449e+06	1.11107e+06	987989	1402991	2.21121e+06	1746448	2.19175e+06	2292293	MOUSE
Q9DBR7	Protein phosphatase 1 regulatory subunit 12A (Myosin phosphatase-targeting subunit 1) (Myosin phosphatase target subunit 1)	Ppp1r12a	11	484426	441031	587986	654251	469619	507745	518819	444472	473754	538214	523980	489446	530054	419265	601243	423397	421939	522162	481869	MOUSE
Q7TMB8	Cytoplasmic FMR1-interacting protein 1 (Specifically Rac1-associated protein 1) (Sra-1)	Cyfip1	10	245715	215331	212501	334200	313754	237779	287385	233878	219837	257857	268355	249604	217052	202808	299776	196242	217785	310841	305886	MOUSE
P62196	26S proteasome regulatory subunit 8 (26S proteasome AAA-ATPase subunit RPT6) (Proteasome 26S subunit ATPase 5) (Proteasome subunit p45) (p45/SUG) (mSUG1)	Psmc5	12	940094	808726	932389	1.23917e+06	1.19696e+06	1.0053e+06	1.05784e+06	963471	931353	968083	1.14306e+06	1.11423e+06	1.00539e+06	929552	1.29762e+06	1.26623e+06	1.02519e+06	1.19106e+06	1.3047e+06	MOUSE
P47738	Aldehyde dehydrogenase, mitochondrial (EC 1.2.1.3) (AHD-M1) (ALDH class 2) (ALDH-E2) (ALDHI)	Aldh2	19	3990381	3241205	4.49835e+06	5.45627e+06	4.9736e+06	4208251	4.10726e+06	4.56608e+06	3.97631e+06	4868073	5726454	5.76181e+06	4449413	4931605	6.24318e+06	7106574	5701904	5917824	7025727	MOUSE
E9Q1G8	Septin	Septin7	12	531527	561336	640594	692924	641067	586756	656400	597919	541059	695189	774628	498088	498735	435001	609010	657625	623777	748682	773755	MOUSE
Q8BMK4	Cytoskeleton-associated protein 4 (63-kDa cytoskeleton-linking membrane protein) (Climp-63) (p63)	Ckap4	15	1.88324e+06	1.78204e+06	2.00655e+06	2351350	661092	1.17998e+06	789320	1.4224e+06	1.61501e+06	1.86518e+06	2.15381e+06	990173	1.1722e+06	1.24943e+06	1.03175e+06	723298	795530	1.25488e+06	559775	MOUSE
Q5XJY5	Coatomer subunit delta (Archain) (Delta-coat protein) (Delta-COP)	Arcn1	11	890406	782654	1195910	1.75011e+06	1.58246e+06	863632	959064	1.19747e+06	1.02643e+06	1.20361e+06	1.61346e+06	1503887	961603	1.39971e+06	1.11409e+06	1.51706e+06	1.12979e+06	1.52787e+06	1264458	MOUSE
Q8C2E7	WASH complex subunit 5 (WASH complex subunit strumpellin)	Washc5	6	140817	94307.9	146036	188017	173674	116918	181082	133668	124361	157528	195269	139448	145727	135728	132731	121923	110640	164773	143941	MOUSE
Q8R0G9	Nuclear pore complex protein Nup133 (133 kDa nucleoporin) (Nucleoporin Nup133)	Nup133	12	210695	251604	305825	341634	361107	347108	291299	274449	262293	1.60153e+06	1.66299e+06	464303	455577	1.77818e+06	575713	522342	502648	553440	2.08048e+06	MOUSE
Q8C483	Seryl-tRNA synthetase (EC 6.1.1.11) (Seryl-tRNA(Ser/Sec) synthetase)	Sars	15	2462086	2.2087e+06	2.89227e+06	3.7194e+06	3.20613e+06	2.9294e+06	2.86681e+06	3.22503e+06	3.13188e+06	3.58414e+06	4407127	2342167	2.25401e+06	2.1061e+06	2.80653e+06	2.20406e+06	2.04085e+06	2703801	2.75188e+06	MOUSE
P06745	Glucose-6-phosphate isomerase (GPI) (EC 5.3.1.9) (Autocrine motility factor) (AMF) (Neuroleukin) (NLK) (Phosphoglucose isomerase) (PGI) (Phosphohexose isomerase) (PHI)	Gpi	15	1.95691e+06	1.62315e+06	2147876	2.56119e+06	3.22884e+06	2.22282e+06	2.90585e+06	2.13226e+06	2059092	2.3131e+06	2.58789e+06	2123132	1.89812e+06	1.71707e+06	2258855	2271097	2.00542e+06	2.61963e+06	2.80428e+06	MOUSE
P54071	Isocitrate dehydrogenase [NADP], mitochondrial (IDH) (EC 1.1.1.42) (ICD-M) (IDP) (NADP(+)-specific ICDH) (Oxalosuccinate decarboxylase)	Idh2	15	1.87043e+06	1.33326e+06	1.7499e+06	2.15768e+06	2.42779e+06	1.80771e+06	1.60235e+06	1.92003e+06	1.55444e+06	2.2002e+06	2.11529e+06	2.8542e+06	2.53646e+06	2585101	3.40454e+06	3.02034e+06	2360643	2.14642e+06	2.29382e+06	MOUSE
P62908	40S ribosomal protein S3 (EC 4.2.99.18)	Rps3	12	4.54824e+06	4536497	5393163	6.9774e+06	4674849	4.49742e+06	4660286	4.74651e+06	5.02418e+06	5510046	6525479	4580393	4.19818e+06	3718297	4939018	3.99597e+06	3780093	5.43254e+06	5551037	MOUSE
B1AU75	Nuclear autoantigenic sperm protein	Nasp	10	326687	326323	324830	474822	467245	384279	443432	332229	393554	348385	419897	459818	557214	424886	538648	525077	428128	526301	570647	MOUSE
P80317	T-complex protein 1 subunit zeta (TCP-1-zeta) (CCT-zeta-1)	Cct6a	15	3.13178e+06	2850932	3.53994e+06	4.24186e+06	3676553	3.34355e+06	3370697	3399165	3.37885e+06	3.62174e+06	4.10254e+06	4034637	3.83266e+06	3493710	4.53386e+06	4.12698e+06	3.58887e+06	4.38186e+06	4523412	MOUSE
Q99KK7	Dipeptidyl peptidase 3 (EC 3.4.14.4) (Dipeptidyl aminopeptidase III) (Dipeptidyl arylamidase III) (Dipeptidyl peptidase III) (DPP III) (Enkephalinase B)	Dpp3	16	513642	494522	564802	701667	788761	742493	675455	569552	576760	638368	747846	679642	646735	580690	772330	750734	640552	776551	845259	MOUSE
Q61024	Asparagine synthetase [glutamine-hydrolyzing] (EC 6.3.5.4) (Glutamine-dependent asparagine synthetase)	Asns	17	1.82593e+06	1.77652e+06	2148511	2816430	2.53616e+06	2.12386e+06	2.16944e+06	2.81119e+06	2.72852e+06	2972629	3529328	2.32222e+06	1.96153e+06	1.93143e+06	2414122	1954586	1.66959e+06	2168387	2.42605e+06	MOUSE
Q9D379	Epoxide hydrolase 1 (EC 3.3.2.9) (Epoxide hydratase) (Microsomal epoxide hydrolase) (mEH)	Ephx1	14	2.36127e+06	2.1375e+06	2648640	3.26846e+06	1.0683e+06	1.43101e+06	1.35689e+06	1.61464e+06	1.85894e+06	2.51037e+06	2.68254e+06	974106	1.31128e+06	1.39597e+06	1.28914e+06	1.08702e+06	1262479	1.77668e+06	897568	MOUSE
Q99JI4	26S proteasome non-ATPase regulatory subunit 6 (26S proteasome regulatory subunit RPN7) (26S proteasome regulatory subunit S10) (p42A)	Psmd6	13	398801	405597	434508	590367	609642	523158	509284	378044	409850	464082	543586	642181	471439	438004	596868	651707	514906	581085	662866	MOUSE
Q61941	NAD(P) transhydrogenase, mitochondrial (EC 7.1.1.1) (Nicotinamide nucleotide transhydrogenase) (Pyridine nucleotide transhydrogenase)	Nnt	14	1.05063e+06	721637	957829	1263625	920787	891072	559213	885484	1.05947e+06	1.01402e+06	1.20681e+06	983856	772237	946588	847831	455861	508539	708561	661604	MOUSE
Q9WTX6	Cullin-1 (CUL-1)	Cul1	2	6045.36	54919	42213.9	58252.8	55719.2	47941.2	52600.3	68794.3	62969.6	67861	92135.2	18274.3	45845.7	34430.6	30638.1	35850.7	52178.3	56914.9	58185	MOUSE
A0A1W2P7Q6	Exportin-T (Exportin(tRNA)) (tRNA exportin)	Xpot	6	203015	161616	212266	283202	193074	134021	257203	241266	214035	251674	305643	210118	176957	183336	311582	179487	139602	208506	207936	MOUSE
P50516	V-type proton ATPase catalytic subunit A (V-ATPase subunit A) (EC 7.1.2.2) (V-ATPase 69 kDa subunit) (Vacuolar proton pump subunit alpha)	Atp6v1a	14	885594	780321	1.06343e+06	1.17393e+06	1.55808e+06	1.41438e+06	1.52998e+06	1.17174e+06	905269	1.08582e+06	1.32991e+06	1.21148e+06	1.0093e+06	1.10418e+06	1.36101e+06	1.23525e+06	968359	1.16085e+06	1.26211e+06	MOUSE
P50580	Proliferation-associated protein 2G4 (IRES-specific cellular trans-acting factor 45 kDa) (ITAF45) (Mpp1) (Proliferation-associated protein 1) (Protein p38-2G4)	Pa2g4	16	3.57955e+06	3.71077e+06	4379485	5082619	3.4144e+06	3.739e+06	3.49051e+06	3.82759e+06	4.36099e+06	4.43142e+06	4964141	3811642	3.98866e+06	3.53673e+06	3869582	2.99473e+06	3.74029e+06	4.84163e+06	4.98688e+06	MOUSE
Q8R050	Eukaryotic peptide chain release factor GTP-binding subunit ERF3A (Eukaryotic peptide chain release factor subunit 3a) (eRF3a) (G1 to S phase transition protein 1 homolog)	Gspt1	9	683930	664879	781675	867585	537608	864497	521124	747592	737559	745807	589782	810380	728262	611539	850902	828924	947963	1.18797e+06	898007	MOUSE
P62259	14-3-3 protein epsilon (14-3-3E)	Ywhae	16	2529351	2.83453e+06	3.05164e+06	3.34037e+06	4.0025e+06	3.07017e+06	2.92117e+06	2.58498e+06	3.22057e+06	4253071	2.9987e+06	2.94008e+06	2.70008e+06	2.46412e+06	4093143	2225365	2362872	2.73459e+06	3.10673e+06	MOUSE
A0A2I3BPY7	Ankycorbin	Rai14	8	188553	147693	142611	240495	267403	262003	181864	169905	113872	131403	212972	178688	189487	128210	220556	246333	179620	189717	203463	MOUSE
Q9JLV5	Cullin-3 (CUL-3)	Cul3	10	248351	218398	262091	399075	310286	308219	306206	316978	295362	331649	417116	316247	299334	273713	301207	332865	296916	399957	403902	MOUSE
F8VQJ3	Laminin subunit gamma-1	Lamc1	8	346507	333454	388470	542042	400880	179057	140731	202735	362374	362657	206449	623745	529860	536831	644606	492763	392104	478275	467023	MOUSE
Q91VD9	NADH-ubiquinone oxidoreductase 75 kDa subunit, mitochondrial (EC 7.1.1.2) (Complex I-75kD) (CI-75kD)	Ndufs1	11	579596	474748	639359	763166	919511	760257	694754	678269	605110	645180	786339	857374	599478	725290	809845	938096	790910	793123	916199	MOUSE
Q9DCD0	6-phosphogluconate dehydrogenase, decarboxylating (EC 1.1.1.44)	Pgd	15	1.59485e+06	1.41912e+06	1.86145e+06	2106134	2695521	2.14799e+06	1.88057e+06	1.61172e+06	1.53438e+06	2.12262e+06	2.04998e+06	1.44252e+06	1.49971e+06	1.2435e+06	2.0919e+06	1.87376e+06	2.29454e+06	2.47638e+06	3200592	MOUSE
P50247	Adenosylhomocysteinase (AdoHcyase) (EC 3.3.1.1) (CUBP) (Liver copper-binding protein) (S-adenosyl-L-homocysteine hydrolase)	Ahcy	8	1.01e+06	1.04785e+06	1.16558e+06	1.68912e+06	1.09759e+06	1.33706e+06	1.09068e+06	1.09887e+06	1.11647e+06	1.13555e+06	1.66942e+06	1.82639e+06	1.32455e+06	1.05402e+06	2.03059e+06	1.20788e+06	1.21494e+06	1.92986e+06	2038580	MOUSE
Q8K2B3	Succinate dehydrogenase [ubiquinone] flavoprotein subunit, mitochondrial (EC 1.3.5.1) (Flavoprotein subunit of complex II) (Fp)	Sdha	11	952406	822230	1.17289e+06	1.26502e+06	1.25696e+06	1.01658e+06	1.06086e+06	1.00538e+06	955030	1.12527e+06	1.15424e+06	1.32213e+06	1.05563e+06	1.11252e+06	1.41845e+06	1.17099e+06	1.06432e+06	1.05929e+06	1.15832e+06	MOUSE
E9PZJ8	Activating signal cointegrator 1 complex subunit 3 (EC 3.6.4.12)	Ascc3	7	104209	89602.4	107005	146540	119098	98457	101344	95097.7	93223	120189	140313	102102	108935	103198	150724	99703.8	101412	151794	149157	MOUSE
Q8QZY1	Eukaryotic translation initiation factor 3 subunit L (eIF3l) (66 kDa tyrosine-rich heat shock protein) (67 kDa polymerase-associated factor) (Eukaryotic translation initiation factor 3 subunit 6-interacting protein) (Eukaryotic translation initiation factor 3 subunit E-interacting protein) (HSP-66Y) (PAF67)	Eif3l	10	578090	599423	653498	848224	597056	578987	663025	577958	602955	692226	737031	594744	649633	543198	746097	613640	666867	868926	834456	MOUSE
P62334	26S proteasome regulatory subunit 10B (26S proteasome AAA-ATPase subunit RPT4) (Proteasome 26S subunit ATPase 6) (Proteasome subunit p42)	Psmc6	13	990628	853573	1.07625e+06	1.39536e+06	1.41001e+06	1.23764e+06	1.24774e+06	1.13997e+06	1078596	1.13774e+06	1.27132e+06	1.24603e+06	1.1025e+06	1.06916e+06	1.26266e+06	1.3792e+06	1110324	1.27626e+06	1.23831e+06	MOUSE
Q3U7R1	Extended synaptotagmin-1 (E-Syt1) (Membrane-bound C2 domain-containing protein)	Esyt1	9	206996	200293	270938	331689	185414	92768.6	133237	219226	210310	262939	299337	144976	159852	182031	174943	148634	121629	198626	158620	MOUSE
P54276	DNA mismatch repair protein Msh6 (G/T mismatch-binding protein) (GTBP) (GTMBP) (MutS protein homolog 6) (MutS-alpha 160 kDa subunit) (p160)	Msh6	8	162521	150784	188036	285763	335165	221364	281721	250902	242281	311447	348464	181412	266140	185974	229712	334367	299030	316464	399612	MOUSE
P14148	60S ribosomal protein L7	Rpl7	12	1.34731e+06	1.47398e+06	1.96623e+06	1.51527e+06	1494053	1.63577e+06	1.72016e+06	1.41155e+06	1378687	1.4241e+06	1.28424e+06	1.69757e+06	1.72875e+06	1.3923e+06	2.21543e+06	1568968	1.86547e+06	2.46928e+06	1.9865e+06	MOUSE
Q9JLI8	Squamous cell carcinoma antigen recognized by T-cells 3 (SART-3) (mSART-3) (Tumor-rejection antigen SART3)	Sart3	6	152920	150939	171739	238797	219525	199447	186799	168742	142217	196658	109764	202878	152815	191074	252150	257580	231194	258510	299285	MOUSE
E9PXY1	Cullin-4B	Cul4b	6	94436.8	89291.6	98965.5	72334.4	111245	65866.6	109576	87752.5	87487	88422.3	55146.9	77042.6	99432.6	77249.3	63610.1	101522	102600	107795	101796	MOUSE
P47856	Glutamine--fructose-6-phosphate aminotransferase [isomerizing] 1 (EC 2.6.1.16) (D-fructose-6-phosphate amidotransferase 1) (Glutamine:fructose-6-phosphate amidotransferase 1) (GFAT 1) (GFAT1) (Hexosephosphate aminotransferase 1)	Gfpt1	13	426155	357932	442919	574966	583786	439419	467954	529962	502659	493780	683504	596027	534305	394019	618507	509844	364446	540297	600001	MOUSE
Q924C1	Exportin-5 (Exp5) (Ran-binding protein 21)	Xpo5	11	453760	419112	506244	573267	356603	309388	471790	510358	539571	591237	679010	487631	501816	474964	480751	506329	359489	636429	496106	MOUSE
P13439	Uridine 5'-monophosphate synthase (UMP synthase) [Includes: Orotate phosphoribosyltransferase (OPRTase) (EC 2.4.2.10);Orotidine 5'-phosphate decarboxylase (EC 4.1.1.23) (OMPdecase)]	Umps	13	994221	813050	1.08039e+06	1407596	864817	755022	734743	1.01901e+06	1.09085e+06	1.05628e+06	1.2694e+06	1.20848e+06	1.02483e+06	1.09621e+06	1.42796e+06	1.26158e+06	1.07778e+06	1.35587e+06	1.43684e+06	MOUSE
Q8BFR5	Elongation factor Tu, mitochondrial	Tufm	16	1.73687e+06	1.5096e+06	1.85378e+06	2.04641e+06	2007008	2202249	1.70994e+06	1.72059e+06	1.62753e+06	1.87649e+06	2.05706e+06	2.2252e+06	2.03047e+06	1.88217e+06	2.3644e+06	2.19958e+06	1910330	1722132	1.97232e+06	MOUSE
P14685	26S proteasome non-ATPase regulatory subunit 3 (26S proteasome regulatory subunit RPN3) (26S proteasome regulatory subunit S3) (Proteasome subunit p58) (Transplantation antigen P91A) (Tum-P91A antigen)	Psmd3	11	850652	782503	1.03476e+06	1.2107e+06	761568	664565	894656	810297	846060	999286	1.14603e+06	597944	714971	635392	753715	730189	864193	1.0305e+06	942990	MOUSE
Q00PI9	Heterogeneous nuclear ribonucleoprotein U-like protein 2 (MLF1-associated nuclear protein)	Hnrnpul2	9	314713	316904	400979	466000	613751	586601	582238	338086	305389	402960	476804	507286	407848	469208	581154	595433	543705	541888	596943	MOUSE
Q91VR5	ATP-dependent RNA helicase DDX1 (EC 3.6.4.13) (DEAD box protein 1)	Ddx1	9	493507	467613	613325	818674	799728	582509	728905	563627	601322	619653	771546	631121	668089	628323	864410	697698	700610	860106	911192	MOUSE
Q62351	Transferrin receptor protein 1 (TR) (TfR) (TfR1) (Trfr) (CD antigen CD71)	Tfrc	17	1025657	1.08407e+06	1.36802e+06	1.90474e+06	1.02396e+06	985698	828925	1.13951e+06	1.32424e+06	1.39622e+06	1.72222e+06	1.22741e+06	1.22604e+06	1.21534e+06	1.52046e+06	1269806	916950	1223840	1.30066e+06	MOUSE
A8C756	Thyroid adenoma-associated protein homolog	Thada	4	120851	104325	85957.5	126944	75381.2	68601.4	74146.4	126113	117510	154693	130227	58408.7	48028.6	121724	105256	94282.1	78855.2	106412	173427	MOUSE
Q9EQH2	Endoplasmic reticulum aminopeptidase 1 (EC 3.4.11.-) (ARTS-1) (Adipocyte-derived leucine aminopeptidase) (A-LAP) (Aminopeptidase PILS) (Puromycin-insensitive leucyl-specific aminopeptidase) (PILS-AP) (VEGF-induced aminopeptidase)	Erap1	9	289556	216848	315935	375000	463197	305191	272352	289041	267416	316035	408110	378802	294207	330994	372041	388485	292211	290430	357944	MOUSE
P05202	Aspartate aminotransferase, mitochondrial (mAspAT) (EC 2.6.1.1) (EC 2.6.1.7) (Fatty acid-binding protein) (FABP-1) (Glutamate oxaloacetate transaminase 2) (Kynurenine aminotransferase 4) (Kynurenine aminotransferase IV) (Kynurenine--oxoglutarate transaminase 4) (Kynurenine--oxoglutarate transaminase IV) (Plasma membrane-associated fatty acid-binding protein) (FABPpm) (Transaminase A)	Got2	13	2.46451e+06	2.27991e+06	2896284	3.50555e+06	3658135	3.88926e+06	3.02705e+06	2.60702e+06	2.54486e+06	2901108	3.37605e+06	3.5259e+06	3.13818e+06	3083048	4328131	5.17866e+06	4.03497e+06	4038336	4.69836e+06	MOUSE
A0A1B0GSG5	Ribonuclease inhibitor (Ribonuclease/angiogenin inhibitor 1)	Rnh1	10	555572	609706	769508	881145	1.32503e+06	1.22555e+06	1126881	695848	521473	850599	804875	768162	767381	683745	872581	989269	730414	883441	868961	MOUSE
Q9D8W5	26S proteasome non-ATPase regulatory subunit 12 (26S proteasome regulatory subunit RPN5) (26S proteasome regulatory subunit p55)	Psmd12	14	916755	979642	1.12415e+06	1.38878e+06	1.36379e+06	1141132	1.20957e+06	901968	875200	1.11577e+06	1.32944e+06	1.23413e+06	1.12279e+06	1.06747e+06	1.37722e+06	1.50927e+06	1.29938e+06	1.6476e+06	1715500	MOUSE
Q61033	Lamina-associated polypeptide 2, isoforms alpha/zeta (Thymopoietin isoforms alpha/zeta) (TP alpha/zeta)	Tmpo	9	890199	880007	1.03665e+06	1.09282e+06	864198	1.13802e+06	955246	951892	1.27972e+06	1.262e+06	1.27557e+06	1.04409e+06	1.20837e+06	909844	1402495	459938	425553	1.37012e+06	1.32384e+06	MOUSE
P50544	Very long-chain specific acyl-CoA dehydrogenase, mitochondrial (EC 1.3.8.9) (MVLCAD) (VLCAD)	Acadvl	10	264999	233989	283330	343040	365726	272814	265505	265739	217185	236653	221751	383941	293884	286331	371070	407409	333214	333544	406459	MOUSE
Q9R0E2	Procollagen-lysine,2-oxoglutarate 5-dioxygenase 1 (EC 1.14.11.4) (Lysyl hydroxylase 1) (LH1)	Plod1	12	409403	391867	534939	573466	684490	545422	560447	402338	419775	415337	468443	756240	671914	577063	741448	609085	397558	529350	559101	MOUSE
P17426	AP-2 complex subunit alpha-1 (100 kDa coated vesicle protein A) (Adaptor protein complex AP-2 subunit alpha-1) (Adaptor-related protein complex 2 subunit alpha-1) (Alpha-adaptin A) (Alpha1-adaptin) (Clathrin assembly protein complex 2 alpha-A large chain) (Plasma membrane adaptor HA2/AP2 adaptin alpha A subunit)	Ap2a1	9	422546	282348	374407	615770	478627	535414	616044	321116	406083	485058	522337	343330	474439	479267	564501	713275	600471	694783	678164	MOUSE
Q8JZN5	Complex I assembly factor ACAD9, mitochondrial (Acyl-CoA dehydrogenase family member 9) (ACAD-9) (EC 1.3.8.-)	Acad9	14	565438	443119	592934	720983	828092	693609	510963	622408	520092	731737	748538	789587	606876	582273	728573	679132	517346	573497	676597	MOUSE
Q9ERG0	LIM domain and actin-binding protein 1 (Epithelial protein lost in neoplasm) (mEPLIN)	Lima1	11	451410	452613	551637	634059	607898	654634	568593	413344	339075	370840	426205	585475	567186	524935	701925	655521	568914	628908	636945	MOUSE
Q9JIF0	Protein arginine N-methyltransferase 1 (EC 2.1.1.319) (Histone-arginine N-methyltransferase PRMT1)	Prmt1	15	981148	986044	1.09538e+06	1.36388e+06	1378811	1.20596e+06	1.12651e+06	1.08785e+06	1.11173e+06	1.08605e+06	1.34307e+06	1.23069e+06	1176497	1.14031e+06	1.31494e+06	1.29766e+06	1.17329e+06	1.3321e+06	1.27223e+06	MOUSE
P30416	Peptidyl-prolyl cis-trans isomerase FKBP4 (PPIase FKBP4) (EC 5.2.1.8) (52 kDa FK506-binding protein) (52 kDa FKBP) (FKBP-52) (59 kDa immunophilin) (p59) (FK506-binding protein 4) (FKBP-4) (FKBP59) (HSP-binding immunophilin) (HBI) (Immunophilin FKBP52) (Rotamase) [Cleaved into: Peptidyl-prolyl cis-trans isomerase FKBP4, N-terminally processed]	Fkbp4	11	766527	809967	902569	1.14944e+06	943339	1.06509e+06	875281	1.12406e+06	1.20466e+06	1.18032e+06	1.35054e+06	1.20283e+06	1.2346e+06	1.07363e+06	1.43335e+06	1.07888e+06	1.03932e+06	1.21419e+06	1.26215e+06	MOUSE
Q99P72	Reticulon-4 (Neurite outgrowth inhibitor) (Nogo protein)	Rtn4	12	795102	841131	908437	1.03203e+06	570454	655924	579235	705546	768872	825304	922115	585827	647104	691603	729298	957891	803470	742659	638600	MOUSE
E9PUU4	Gem-associated protein 5	Gemin5	3	72331.5	69160.4	80161.9	90371.6	83961	60855.5	67581.6	62450	109374	77793.8	58444	92594.4	105194	87904.7	126645	124100	102962	129352	128501	MOUSE
Q9Z1F9	SUMO-activating enzyme subunit 2 (EC 2.3.2.-) (Anthracycline-associated resistance ARX) (Ubiquitin-like 1-activating enzyme E1B) (Ubiquitin-like modifier-activating enzyme 2)	Uba2	9	244035	329739	359625	411415	412371	450027	406509	340382	412381	342536	285351	363196	363835	373695	483010	342511	355550	421016	464135	MOUSE
P05201	Aspartate aminotransferase, cytoplasmic (cAspAT) (EC 2.6.1.1) (EC 2.6.1.3) (Cysteine aminotransferase, cytoplasmic) (Cysteine transaminase, cytoplasmic) (cCAT) (Glutamate oxaloacetate transaminase 1) (Transaminase A)	Got1	18	1.6315e+06	1.47353e+06	1.83544e+06	2136318	2.47355e+06	2.44744e+06	2.17552e+06	1.98172e+06	1.84063e+06	2.1231e+06	2.37245e+06	1.86035e+06	1.67777e+06	1.53667e+06	2.07283e+06	1571348	1.49658e+06	1.90054e+06	1.86084e+06	MOUSE
P46061	Ran GTPase-activating protein 1 (RanGAP1)	Rangap1	10	411876	452905	481260	561730	446934	516326	377000	326664	381775	275257	384718	482661	442281	464968	667130	715042	631193	756695	765510	MOUSE
Q9CR16	Peptidyl-prolyl cis-trans isomerase D (PPIase D) (EC 5.2.1.8) (40 kDa peptidyl-prolyl cis-trans isomerase) (Cyclophilin-40) (CYP-40) (Rotamase D)	Ppid	9	1.10476e+06	1.09052e+06	1.33986e+06	1.59249e+06	1.06317e+06	872257	1.0849e+06	1370546	1.45659e+06	1.53855e+06	1.74164e+06	1.31667e+06	1.23906e+06	1.10616e+06	1.45401e+06	1.21886e+06	1.13508e+06	1478651	1.44348e+06	MOUSE
Q6ZWX6	Eukaryotic translation initiation factor 2 subunit 1 (Eukaryotic translation initiation factor 2 subunit alpha) (eIF-2-alpha) (eIF-2A) (eIF-2alpha)	Eif2s1	12	744297	735274	982607	1.11513e+06	1.00738e+06	965476	968692	901455	904560	966478	1.03908e+06	937978	911794	811830	1.05321e+06	866775	789593	978816	1.07182e+06	MOUSE
P48722	Heat shock 70 kDa protein 4L (Heat shock 70-related protein APG-1) (Osmotic stress protein 94)	Hspa4l	12	419378	421371	450114	590866	660071	487486	527702	568105	491092	459331	521270	544849	245191	620346	533652	763840	649754	735815	762551	MOUSE
Q62318	Transcription intermediary factor 1-beta (TIF1-beta) (E3 SUMO-protein ligase TRIM28) (EC 2.3.2.27) (KRAB-A-interacting protein) (KRIP-1) (RING-type E3 ubiquitin transferase TIF1-beta) (Tripartite motif-containing protein 28)	Trim28	12	958129	1.03369e+06	1.27013e+06	1.56132e+06	1.65566e+06	1.43179e+06	1.44087e+06	1.21607e+06	1.17435e+06	1.34465e+06	1.4041e+06	1.38464e+06	1.291e+06	1.4169e+06	1.8711e+06	1.73556e+06	1.36579e+06	1681979	1.85251e+06	MOUSE
P19324	Serpin H1 (47 kDa heat shock protein) (Collagen-binding protein) (Colligin) (Serine protease inhibitor J6)	Serpinh1	17	12789855	11598646	14746830	17599398	12325145	10274350	10265723	11948015	10989250	13001300	14970587	17121648	15575976	15973206	19625904	14982509	11970602	13550764	14237088	MOUSE
P58281	Dynamin-like 120 kDa protein, mitochondrial (EC 3.6.5.5) (Large GTP-binding protein) (LargeG) (Optic atrophy protein 1 homolog) [Cleaved into: Dynamin-like 120 kDa protein, form S1]	Opa1	7	86503	106502	107497	110451	137271	69376.4	57021.5	135678	112839	134370	178605	134181	142637	140065	115493	168286	133219	84168.7	100527	MOUSE
Q61696	Heat shock 70 kDa protein 1A (Heat shock 70 kDa protein 3) (HSP70.3) (Hsp68)	Hspa1a	7	182287	176078	192140	282305	287663	287062	278610	151382	146287	150762	212351	168558	156599	140704	210214	265442	239887	288871	317889	MOUSE
B1AU25	Apoptosis-inducing factor 1, mitochondrial	Aifm1	14	981147	811785	1.08662e+06	1.3174e+06	1371688	1.21364e+06	1.09952e+06	1.04317e+06	987953	1112325	1.27003e+06	1.63732e+06	1.38722e+06	1.34029e+06	1.77525e+06	1.78623e+06	1.25667e+06	1.31135e+06	1339138	MOUSE
Q61753	D-3-phosphoglycerate dehydrogenase (3-PGDH) (EC 1.1.1.95) (A10)	Phgdh	14	3.01346e+06	2.84908e+06	3.43068e+06	4463336	4236188	4554972	3.0878e+06	3.1558e+06	4.10935e+06	4.18671e+06	4886550	3.84941e+06	3.07056e+06	2.72612e+06	3.97862e+06	3.87033e+06	2.20318e+06	3687220	3925623	MOUSE
Q9CZU3	Exosome RNA helicase MTR4 (EC 3.6.4.13) (ATP-dependent helicase SKIV2L2) (Superkiller viralicidic activity 2-like 2) (TRAMP-like complex helicase)	Mtrex	8	213528	154845	238440	240820	314867	174398	215580	222899	182385	213801	268097	330363	302008	315076	354662	399396	274563	300345	374479	MOUSE
Q8VI75	Importin-4 (Imp4) (Importin-4a) (Imp4a) (Ran-binding protein 4) (RanBP4)	Ipo4	9	491418	430403	569889	742590	610193	484425	510888	486309	475232	529126	632049	612277	536844	559865	693845	644140	539104	741417	797138	MOUSE
P54775	26S proteasome regulatory subunit 6B (26S proteasome AAA-ATPase subunit RPT3) (CIP21) (MB67-interacting protein) (MIP224) (Proteasome 26S subunit ATPase 4) (Tat-binding protein 7) (TBP-7)	Psmc4	11	720879	671098	907632	1.09155e+06	1.01738e+06	918048	1.10064e+06	918211	907702	687477	907590	884672	837025	976281	1.2472e+06	1.09841e+06	1.11427e+06	1.15395e+06	1.41508e+06	MOUSE
P51660	Peroxisomal multifunctional enzyme type 2 (MFE-2) (17-beta-hydroxysteroid dehydrogenase 4) (17-beta-HSD 4) (D-bifunctional protein) (DBP) (Multifunctional protein 2) (MFP-2) [Cleaved into: (3R)-hydroxyacyl-CoA dehydrogenase (EC 1.1.1.n12);Enoyl-CoA hydratase 2 (EC 4.2.1.107) (EC 4.2.1.119) (3-alpha,7-alpha,12-alpha-trihydroxy-5-beta-cholest-24-enoyl-CoA hydratase)]	Hsd17b4	15	603541	576296	721816	846390	1.25823e+06	1.21873e+06	1.01771e+06	647595	622165	754311	807103	974102	878841	900987	1.12003e+06	1.29428e+06	982826	1.02045e+06	1.10886e+06	MOUSE
Q7TT37	Elongator complex protein 1 (ELP1) (IkappaB kinase complex-associated protein) (IKK complex-associated protein)	Elp1	9	315090	281061	249567	407344	349049	337188	324392	291906	332178	226616	408371	279130	297194	222877	317306	250902	229205	256575	320393	MOUSE
F8WIE5	HECT-type E3 ubiquitin transferase (EC 2.3.2.26)	Hectd1	2	10977.8	17989.2	28186.8	24461.4	19576.2	31025.8	23072.4	20626	16851.5	12544.7	16592.5	13643.2	25735.2	22395.2	20288.6	10602.5	5862.74	28182.3	34657.9	MOUSE
Q00612	Glucose-6-phosphate 1-dehydrogenase X (G6PD) (EC 1.1.1.49)	G6pdx	14	1.07222e+06	1.13717e+06	1.2305e+06	1.40459e+06	1.75508e+06	1.55838e+06	1.54882e+06	1.38376e+06	1.34917e+06	1.45713e+06	1.70596e+06	1.55326e+06	1.32128e+06	1.32538e+06	1.73478e+06	1601082	1.32067e+06	1.68936e+06	1.91131e+06	MOUSE
Q3UJB0	Splicing factor 3b, subunit 2	Sf3b2	9	453788	471335	523726	638891	736230	786513	717061	554499	430608	607956	512533	553830	665722	649144	757673	938162	672501	773978	802969	MOUSE
Q91YR7	Pre-mRNA-processing factor 6 (PRP6 homolog) (U5 snRNP-associated 102 kDa protein) (U5-102 kDa protein)	Prpf6	7	174520	181215	153462	230083	172241	232302	164523	159505	181119	184807	208935	205748	214649	172287	231460	212743	237084	271043	253755	MOUSE
A2AL12	Heterogeneous nuclear ribonucleoprotein A3	Hnrnpa3	17	2.90667e+06	2.65039e+06	3364373	3635258	4609682	4504915	3.84683e+06	3.00944e+06	2.88176e+06	3.21144e+06	3.6486e+06	4532723	4.2717e+06	4.1216e+06	5.03471e+06	5.26864e+06	4.10507e+06	4.30425e+06	4.34595e+06	MOUSE
P12382	ATP-dependent 6-phosphofructokinase, liver type (ATP-PFK) (PFK-L) (EC 2.7.1.11) (6-phosphofructokinase type B) (Phosphofructo-1-kinase isozyme B) (PFK-B) (Phosphohexokinase)	Pfkl	11	646063	555138	727370	903901	1.05903e+06	920651	918831	739453	749797	824790	930098	880353	841225	789250	1.0526e+06	806558	683975	949691	996657	MOUSE
A0A0R4J0G0	Phosphoenolpyruvate carboxykinase (GTP) (EC 4.1.1.32)	Pck2	17	1.55228e+06	1.27815e+06	1.73528e+06	1.77959e+06	1.6937e+06	1.57062e+06	1.47548e+06	1.87223e+06	1.70764e+06	2.08636e+06	2.37884e+06	1.84444e+06	1.23938e+06	1.51344e+06	1.91003e+06	1.21226e+06	971415	1.16973e+06	1.31559e+06	MOUSE
A2A9Q2	Nardilysin, N-arginine dibasic convertase, NRD convertase 1	Nrd1	8	208614	198532	238518	313104	358307	287849	251473	241778	234357	240002	298444	263317	234728	233602	290834	298600	245185	336327	312117	MOUSE
Q8R5H1	Ubiquitin carboxyl-terminal hydrolase 15 (EC 3.4.19.12) (Deubiquitinating enzyme 15) (Ubiquitin thioesterase 15) (Ubiquitin-specific-processing protease 15)	Usp15	7	109071	121059	110477	163056	156094	107906	118531	122016	140517	124378	147581	141628	131398	126550	167115	170004	151664	187012	187239	MOUSE
E9Q903	Catenin delta-1	Ctnnd1	9	393119	332576	403177	527030	478741	433624	512386	335633	313962	367702	416295	534968	481847	444827	621253	399372	376514	462718	466781	MOUSE
Q6P5B0	RRP12-like protein	Rrp12	10	463582	440844	526647	603701	163121	163345	175457	485491	546224	648167	643557	213714	176727	163313	220550	356424	353131	319796	321480	MOUSE
Q8BFY9	Transportin-1 (Importin beta-2) (Karyopherin beta-2)	Tnpo1	9	249528	229862	236993	347817	337792	278100	229478	261882	242561	280263	261992	304188	226534	232086	360936	291488	237015	250704	298757	MOUSE
A2AMW0	F-actin-capping protein subunit beta	Capzb	11	916239	903268	1.16255e+06	1.40656e+06	1.50945e+06	1611397	1.48097e+06	1.10387e+06	1130174	1221590	1.36199e+06	1.32737e+06	1.21944e+06	1.16242e+06	1.51103e+06	1300626	1.08706e+06	1.32094e+06	1416739	MOUSE
Q8CGY8	UDP-N-acetylglucosamine--peptide N-acetylglucosaminyltransferase 110 kDa subunit (EC 2.4.1.255) (O-GlcNAc transferase subunit p110) (O-linked N-acetylglucosamine transferase 110 kDa subunit) (OGT)	Ogt	8	171540	175964	227121	259551	244248	232974	202579	191711	186585	228178	264481	277815	227053	231677	317683	305213	238660	310866	314440	MOUSE
Q8VCT3	Aminopeptidase B (AP-B) (EC 3.4.11.6) (Arginine aminopeptidase) (Arginyl aminopeptidase) (Cytosol aminopeptidase IV)	Rnpep	9	239443	264631	294463	360656	336284	255436	279353	333871	310987	363714	388382	328200	319454	219224	390789	305459	312358	345116	391127	MOUSE
Q91YP2	Neurolysin, mitochondrial (EC 3.4.24.16) (Microsomal endopeptidase) (MEP) (Mitochondrial oligopeptidase M) (Neurotensin endopeptidase)	Nln	12	333025	293273	377405	440621	433853	382917	360617	307270	328445	354967	489983	489258	333421	339446	528325	378536	305366	315060	477161	MOUSE
Q8C2Q3	RNA-binding protein 14 (RNA-binding motif protein 14)	Rbm14	8	457551	398089	501977	514459	658769	694684	615355	445145	459504	520738	503303	559642	595903	567620	772182	819560	709051	725689	699817	MOUSE
G5E924	Heterogeneous nuclear ribonucleoprotein L (Fragment)	Hnrnpl	13	951230	890279	1.12453e+06	1.25513e+06	1326390	1.32623e+06	1.24939e+06	1.0211e+06	1.0483e+06	1.09082e+06	1.21917e+06	1.43134e+06	1.36353e+06	1.26701e+06	1.70252e+06	1.76209e+06	1.42658e+06	1.49121e+06	1.44098e+06	MOUSE
O70475	UDP-glucose 6-dehydrogenase (UDP-Glc dehydrogenase) (UDP-GlcDH) (UDPGDH) (EC 1.1.1.22)	Ugdh	15	1.12644e+06	1.12442e+06	1.31433e+06	1.76356e+06	2.25671e+06	2.29009e+06	2033781	1242841	1.22253e+06	1.30326e+06	1.46367e+06	1.38015e+06	1.26708e+06	1175260	1.59878e+06	1.60869e+06	1.35514e+06	1.72497e+06	1.8189e+06	MOUSE
P70698	CTP synthase 1 (EC 6.3.4.2) (CTP synthetase 1) (UTP--ammonia ligase 1)	Ctps1	10	816012	937339	1.11558e+06	1.35383e+06	989600	805084	901588	1.07932e+06	953331	1.08917e+06	1236814	963928	943485	865713	1.19254e+06	878608	843024	1.12953e+06	1.08798e+06	MOUSE
Q8BYA0	Tubulin-specific chaperone D (Beta-tubulin cofactor D) (Tubulin-folding cofactor D)	Tbcd	5	122362	98984.9	146117	181522	194785	190295	188826	92510.6	122423	137298	122516	137280	130225	99901.5	127650	178628	113921	185754	195346	MOUSE
Z4YJT3	La-related protein 1	Larp1	7	202880	210684	240879	288159	178900	129602	190013	157469	208769	248252	259765	164243	188460	163174	181854	138927	205399	252161	203615	MOUSE
Q8BMA6	Signal recognition particle subunit SRP68 (SRP68) (Signal recognition particle 68 kDa protein)	Srp68	9	281491	250678	318562	368026	295572	274233	341441	305817	282492	341323	326540	249040	336463	242143	325138	328086	299529	424423	415558	MOUSE
P61979	Heterogeneous nuclear ribonucleoprotein K (hnRNP K)	Hnrnpk	16	5.64572e+06	4.85107e+06	6549840	7686526	8189214	6662958	7.32763e+06	6.32736e+06	5.86984e+06	6.3593e+06	7.41709e+06	7.9489e+06	7188747	6.70236e+06	8823425	8728360	6.7815e+06	8.25089e+06	8624162	MOUSE
Q9JMA1	Ubiquitin carboxyl-terminal hydrolase 14 (EC 3.4.19.12) (Deubiquitinating enzyme 14) (Ubiquitin thioesterase 14) (Ubiquitin-specific-processing protease 14)	Usp14	11	641092	720879	835328	986255	985455	1.00369e+06	864569	809969	808577	835458	939098	840107	792973	696753	1.01981e+06	898849	794401	1.01058e+06	1.10704e+06	MOUSE
F8VQC7	Kinectin	Ktn1	10	242496	252592	345158	256166	324071	345364	299648	184097	228122	248532	311341	249257	320251	163158	199881	275389	321481	323617	214478	MOUSE
P40124	Adenylyl cyclase-associated protein 1 (CAP 1)	Cap1	16	1.45256e+06	1.31359e+06	1.71857e+06	1.88028e+06	2.03412e+06	1.89203e+06	2.00209e+06	1.47205e+06	1.37423e+06	1565477	1.72257e+06	1.54423e+06	1411271	1.38093e+06	1.73829e+06	1.17578e+06	1.15856e+06	1.39859e+06	1.35489e+06	MOUSE
E9Q1S3	Protein transport protein SEC23	Sec23a	8	195775	170544	218078	245198	314582	248502	223366	183360	172612	202785	216151	207529	198853	191333	246992	191248	154664	252316	216092	MOUSE
P26443	Glutamate dehydrogenase 1, mitochondrial (GDH 1) (EC 1.4.1.3)	Glud1	16	1.49947e+06	1.31643e+06	1.67144e+06	2.0238e+06	2613159	2.63044e+06	2.09861e+06	1.32728e+06	1.37261e+06	1.57272e+06	1.85173e+06	2.22174e+06	1.80263e+06	1.86895e+06	2.44509e+06	2.08486e+06	1.70881e+06	1.81687e+06	2006364	MOUSE
P37040	NADPH--cytochrome P450 reductase (CPR) (P450R) (EC 1.6.2.4)	Por	9	568706	567190	656653	821981	441559	371153	332896	514082	650916	715760	871913	335471	302867	348045	416472	399329	374108	517815	338193	MOUSE
Q6IRU2	Tropomyosin alpha-4 chain (Tropomyosin-4)	Tpm4	15	4.36602e+06	4547076	4852342	5.39125e+06	5.29874e+06	6.75403e+06	6474419	4.00843e+06	4.39746e+06	4.15978e+06	4723590	5882696	6.29473e+06	5699903	6799566	5495893	4913675	5507003	5434328	MOUSE
G3X956	FACT complex subunit	Supt16	4	90519	97295.9	120144	133919	120505	130011	125490	91123.7	79432	93620	119362	122133	90291.4	97928.5	135775	126516	118180	139762	105055	MOUSE
Q9Z1T1	AP-3 complex subunit beta-1 (Adaptor protein complex AP-3 subunit beta-1) (Adaptor-related protein complex 3 subunit beta-1) (Beta-3A-adaptin) (Clathrin assembly protein complex 3 beta-1 large chain)	Ap3b1	6	203719	177016	231522	317601	326659	286308	263917	206702	180991	213591	280164	254591	219400	205072	266313	228074	220135	341517	302304	MOUSE
Q8K363	ATP-dependent RNA helicase DDX18 (EC 3.6.4.13) (DEAD box protein 18)	Ddx18	8	313492	333729	410201	434911	308874	280629	258394	397092	419526	419597	480833	407546	317498	351420	430459	448150	350591	393238	395415	MOUSE
P62814	V-type proton ATPase subunit B, brain isoform (V-ATPase subunit B 2) (Endomembrane proton pump 58 kDa subunit) (Vacuolar proton pump subunit B 2)	Atp6v1b2	13	551654	469000	705698	815670	1.32346e+06	987692	1.00003e+06	743821	603113	760980	855945	930979	823568	721367	1.01509e+06	828546	692647	856450	876529	MOUSE
A0A0R4J140	Clustered mitochondria protein homolog	Cluh	5	185934	235361	233240	265347	206594	181400	170706	224506	256002	250913	274456	178036	193343	165275	252017	304983	216187	316142	263595	MOUSE
Q8BK67	Protein RCC2	Rcc2	16	1.31164e+06	1.2295e+06	1.61595e+06	1.87661e+06	1548914	1569807	1.3959e+06	1.58806e+06	1.64669e+06	1.69902e+06	2.02688e+06	1.25221e+06	1.22293e+06	1.15088e+06	1.58676e+06	1.25634e+06	1.16525e+06	1.52267e+06	1.47321e+06	MOUSE
A2A6U3	Septin-9	Septin9	13	1.12051e+06	959724	1.29754e+06	1.51977e+06	1.94683e+06	2.05235e+06	1.81803e+06	1.02516e+06	1.02738e+06	1.14919e+06	1.24154e+06	1.26934e+06	1.27021e+06	1.01761e+06	1.45438e+06	1.82879e+06	1.7312e+06	2.19458e+06	2314906	MOUSE
Q9Z1Z0	General vesicular transport factor p115 (Protein USO1 homolog) (Transcytosis-associated protein) (TAP) (Vesicle-docking protein)	Uso1	11	386323	328546	469353	521154	411738	334855	356543	306639	412138	353609	520720	405736	367249	380455	489666	438726	379495	628470	530866	MOUSE
Q9CQ65	S-methyl-5'-thioadenosine phosphorylase (EC 2.4.2.28) (5'-methylthioadenosine phosphorylase) (MTA phosphorylase) (MTAP) (MTAPase)	Mtap	11	4187939	3630506	4781490	5.58975e+06	11178097	11323053	9730980	3.57475e+06	3746554	4.19362e+06	4.74369e+06	4.79094e+06	4.18593e+06	3826488	5.33703e+06	3.53485e+06	3.15285e+06	3.92577e+06	4.12415e+06	MOUSE
Q9Z315	U4/U6.U5 tri-snRNP-associated protein 1 (Hypoxia-associated factor) (Squamous cell carcinoma antigen recognized by T-cells 1) (SART-1) (mSART-1)	Sart1	4	97964.9	91322.6	96632.9	104214	126277	163832	123500	86596.6	100678	99520.6	112410	116759	129033	99365.2	146968	141995	134375	151225	125692	MOUSE
O88685	26S proteasome regulatory subunit 6A (26S proteasome AAA-ATPase subunit RPT5) (Proteasome 26S subunit ATPase 3) (Tat-binding protein 1) (TBP-1)	Psmc3	13	751208	700823	891158	1.13394e+06	1.06667e+06	771918	991449	904451	787191	887341	1.08958e+06	1.03111e+06	829464	869305	1.10757e+06	1.0796e+06	823837	1.02684e+06	1.13187e+06	MOUSE
Q8CIN4	Serine/threonine-protein kinase PAK 2 (EC 2.7.11.1) (Gamma-PAK) (p21-activated kinase 2) (PAK-2) [Cleaved into: PAK-2p27;PAK-2p34]	Pak2	10	542894	532096	681859	807527	623941	633768	472361	609679	589067	619650	693960	692606	630914	528045	761450	721125	643479	771664	855338	MOUSE
P13864	DNA (cytosine-5)-methyltransferase 1 (Dnmt1) (Met-1) (EC 2.1.1.37) (DNA methyltransferase MmuI) (DNA MTase MmuI) (M.MmuI) (MCMT)	Dnmt1	11	368273	413196	405295	511511	244537	218170	232833	290911	329161	339614	389436	153044	211169	208544	289804	199029	211847	293541	277144	MOUSE
P14211	Calreticulin (CRP55) (Calregulin) (Endoplasmic reticulum resident protein 60) (ERp60) (HACBP)	Calr	10	2212570	1.70677e+06	2517401	2.71375e+06	2357342	2.39353e+06	2.14147e+06	2.07931e+06	1.98863e+06	2.1273e+06	2.42577e+06	2612697	2.82375e+06	2.631e+06	2.77608e+06	4442435	3.41474e+06	3.85095e+06	3827119	MOUSE
Q8K2Z4	Condensin complex subunit 1 (Chromosome condensation-related SMC-associated protein 1) (Chromosome-associated protein D2) (mCAP-D2) (Non-SMC condensin I complex subunit D2) (XCAP-D2 homolog)	Ncapd2	5	95788.5	82320.8	103391	120005	129259	99945.4	103056	96314.9	105733	95638.3	120249	78451.4	89149.4	103762	131964	88219.9	78587.7	135033	152831	MOUSE
A0A087WQS2	Basic leucine zipper and W2 domain-containing protein 1	Bzw1	8	471274	518712	662118	782949	765017	798482	663202	624482	687293	708529	792015	722711	697147	620796	827332	678187	625828	829825	909716	MOUSE
F8WHM5	Golgi apparatus protein 1 (Fragment)	Glg1	7	236501	187142	268534	354195	320746	294843	281944	204075	224026	226357	293075	255317	236170	294620	250081	413479	316593	408496	369437	MOUSE
Q99MR6	Serrate RNA effector molecule homolog (Arsenite-resistance protein 2)	Srrt	7	240724	222459	300397	308720	356225	327874	278600	223002	254092	260690	250054	352712	298299	258786	333714	472620	335959	362145	413963	MOUSE
Q9Z1X4	Interleukin enhancer-binding factor 3	Ilf3	9	412866	384499	463705	565077	557393	538841	584874	389598	373489	456351	528426	432814	426987	359909	500639	509336	449731	550780	576250	MOUSE
Q8R1F1	Protein Niban 2 (Meg-3) (Niban-like protein 1) (Protein FAM129B)	Niban2	14	734126	652679	839981	971872	1.44805e+06	1.11936e+06	1.24546e+06	723715	731800	795853	907636	1.07653e+06	970606	887948	1.11915e+06	992703	913161	1.14342e+06	1.2002e+06	MOUSE
Q9R1T2	SUMO-activating enzyme subunit 1 (Ubiquitin-like 1-activating enzyme E1A) [Cleaved into: SUMO-activating enzyme subunit 1, N-terminally processed]	Sae1	11	323954	302194	382826	450263	478982	392763	445893	402955	393358	461176	465070	433336	395582	364810	482374	440517	443432	544977	543760	MOUSE
Q99JY9	Actin-related protein 3 (Actin-like protein 3)	Actr3	12	1.66274e+06	1.72161e+06	2.26753e+06	2.57287e+06	3.04373e+06	2.29276e+06	2.39006e+06	2.22501e+06	2.01171e+06	2.40123e+06	2.72697e+06	2.8686e+06	2333352	2.35697e+06	3.12242e+06	2.80023e+06	2.37074e+06	2933141	3.07634e+06	MOUSE
P46460	Vesicle-fusing ATPase (EC 3.6.4.6) (N-ethylmaleimide-sensitive fusion protein) (NEM-sensitive fusion protein) (Suppressor of K(+) transport growth defect 2) (Protein SKD2) (Vesicular-fusion protein NSF)	Nsf	9	247522	234939	221710	617116	638714	431607	326490	241043	292496	296378	348581	321733	285912	316900	405684	443705	383643	426608	433482	MOUSE
Q9DBR1	5'-3' exoribonuclease 2 (EC 3.1.13.-) (Protein Dhm1)	Xrn2	10	269518	228448	348566	379813	464234	306718	253185	397571	279696	328324	472073	291399	288823	251281	338583	393418	345339	376934	343649	MOUSE
Q8CI51	PDZ and LIM domain protein 5 (Enigma homolog) (Enigma-like PDZ and LIM domains protein)	Pdlim5	15	2171950	2.0643e+06	2.61084e+06	2.8997e+06	1.87223e+06	2.01781e+06	1.71671e+06	1.99586e+06	2.00872e+06	2.29435e+06	2.38199e+06	1.91732e+06	1.85846e+06	1.59546e+06	2402103	1.0959e+06	1.05941e+06	1.31761e+06	1.34736e+06	MOUSE
P51881	ADP/ATP translocase 2 (ADP,ATP carrier protein 2) (Adenine nucleotide translocator 2) (ANT 2) (Solute carrier family 25 member 5) [Cleaved into: ADP/ATP translocase 2, N-terminally processed]	Slc25a5	4	562144	484151	625434	930069	784498	694494	646624	668250	673727	578469	834156	811265	544049	628865	688885	584993	656812	811545	716974	MOUSE
P61222	ATP-binding cassette sub-family E member 1 (RNase L inhibitor) (Ribonuclease 4 inhibitor) (RNS4I)	Abce1	11	697770	671198	830912	1.0581e+06	716543	609355	677089	735429	714788	797359	908597	696407	675405	592367	720313	795883	719524	975856	946872	MOUSE
P68040	Receptor of activated protein C kinase 1 (12-3) (Guanine nucleotide-binding protein subunit beta-2-like 1) (Receptor for activated C kinase) (Receptor of activated protein kinase C 1) (p205) [Cleaved into: Receptor of activated protein C kinase 1, N-terminally processed (Guanine nucleotide-binding protein subunit beta-2-like 1, N-terminally processed)]	Rack1	17	6217825	5.99555e+06	7.66182e+06	9250558	8756375	8554450	7399484	7539742	7519882	7.64391e+06	8651103	8787517	7.84983e+06	7.17147e+06	9718121	8.27657e+06	7062709	9133018	9527307	MOUSE
E9QKZ2	Importin-9	Ipo9	8	252454	228073	296996	366762	408493	282517	355468	333101	294811	315038	401428	361921	307119	321086	407321	335328	283804	384906	398657	MOUSE
Q9EPE9	Endoplasmic reticulum transmembrane helix translocase (EC 7.4.2.-) (Endoplasmic reticulum P5A-ATPase)	Atp13a1	6	129286	106329	118040	177091	65769.6	53774.4	137099	81766.1	116472	151481	167420	50142	54267.9	103109	156117	73540	77638.4	104290	127910	MOUSE
Q5SV02	DNA repair protein RAD50	Rad50	4	102680	108908	92127.3	110842	216346	200917	164488	41680.8	109644	120574	222817	101733	112925	103572	133631	132380	133618	156940	159762	MOUSE
O35643	AP-1 complex subunit beta-1 (Adaptor protein complex AP-1 subunit beta-1) (Adaptor-related protein complex 1 subunit beta-1) (Beta-1-adaptin) (Beta-adaptin 1) (Clathrin assembly protein complex 1 beta large chain) (Golgi adaptor HA1/AP1 adaptin beta subunit)	Ap1b1	11	542785	463253	618419	747128	925561	639420	749894	490911	487573	606821	651279	762771	636122	641090	814065	778554	701615	897802	923240	MOUSE
P11440	Cyclin-dependent kinase 1 (CDK1) (EC 2.7.11.22) (EC 2.7.11.23) (Cell division control protein 2 homolog) (Cell division protein kinase 1) (p34 protein kinase)	Cdk1	8	494266	574925	612129	778576	464927	488737	398150	453694	556997	460990	588419	700578	664506	582782	724958	665049	557392	673260	802021	MOUSE
F8VQC1	Signal recognition particle subunit SRP72	Srp72	10	284987	241611	298224	372238	323767	274253	329263	296595	268198	267571	424442	311499	300338	241807	318990	326183	299920	371602	382576	MOUSE
Q58A65	C-Jun-amino-terminal kinase-interacting protein 4 (JIP-4) (JNK-interacting protein 4) (JNK-associated leucine-zipper protein) (JLP) (JNK/SAPK-associated protein 2) (JSAP2) (Mitogen-activated protein kinase 8-interacting protein 4) (Sperm-associated antigen 9)	Spag9	6	108212	100225	125053	137895	126786	149355	154666	102336	115060	120214	150278	86278.7	123820	80439.9	139775	93905.2	111102	121492	134860	MOUSE
O88544	COP9 signalosome complex subunit 4 (SGN4) (Signalosome subunit 4) (JAB1-containing signalosome subunit 4)	Cops4	10	458197	438245	529460	618978	668681	652188	573908	486681	488051	534283	583515	621312	598200	541358	694207	683912	626167	770538	814338	MOUSE
Q9D0F9	Phosphoglucomutase-1 (PGM 1) (EC 5.4.2.2) (Glucose phosphomutase 1) (Phosphoglucomutase-2)	Pgm1	11	315613	245544	327252	429678	942498	768091	929544	310803	329540	357240	407287	352545	364557	291973	476005	380747	373500	477060	476286	MOUSE
Q9QYB1	Chloride intracellular channel protein 4 (mc3s5/mtCLIC)	Clic4	11	958651	914778	1.20977e+06	1.28372e+06	1.17121e+06	1.08713e+06	1097278	1.07848e+06	1.06025e+06	1111469	1.21249e+06	1.05891e+06	1.02607e+06	721194	1.20458e+06	697929	823896	1.0065e+06	1.03482e+06	MOUSE
Q8BIJ6	Isoleucine--tRNA ligase, mitochondrial (EC 6.1.1.5) (Isoleucyl-tRNA synthetase) (IleRS)	Iars2	7	283634	230928	255518	334182	291365	248993	204941	224161	251878	193436	324506	394596	218986	315835	353502	296250	195030	208768	298777	MOUSE
P28658	Ataxin-10 (Brain protein E46) (Spinocerebellar ataxia type 10 protein homolog)	Atxn10	14	600990	536926	758162	886232	906861	733390	740996	580035	618651	681881	806438	960496	794023	836608	989456	1122673	900867	1229441	1.27574e+06	MOUSE
Q9D6Z1	Nucleolar protein 56 (Nucleolar protein 5A)	Nop56	9	906230	877031	982412	1.20704e+06	328148	368825	469681	771180	975846	1.16629e+06	1.21505e+06	435948	442503	385542	404588	474682	474697	700926	567060	MOUSE
Q9CVB6	Actin-related protein 2/3 complex subunit 2 (Arp2/3 complex 34 kDa subunit) (p34-ARC)	Arpc2	8	552042	549347	723231	907730	856974	860146	775360	604839	703336	799181	891946	808777	813626	727191	987822	732269	731003	926380	929918	MOUSE
P24547	Inosine-5'-monophosphate dehydrogenase 2 (IMP dehydrogenase 2) (IMPD 2) (IMPDH 2) (EC 1.1.1.205) (IMPDH-II)	Impdh2	12	1.3523e+06	1.36012e+06	1.55609e+06	2159687	1.24208e+06	1.43777e+06	1.09422e+06	1.52693e+06	1.61747e+06	1.53177e+06	1.89191e+06	1.87338e+06	1.62166e+06	1.50842e+06	2.14559e+06	1.79814e+06	1469356	1.86445e+06	1.94119e+06	MOUSE
Q8BGD9	Eukaryotic translation initiation factor 4B (eIF-4B)	Eif4b	9	740668	796722	925746	985454	990914	1.01085e+06	1.01524e+06	835023	899847	934075	980433	832468	949206	758185	1.14895e+06	1.09814e+06	1.17423e+06	1.43771e+06	1.44563e+06	MOUSE
Q9CPY7	Cytosol aminopeptidase (EC 3.4.11.1) (Cysteinylglycine-S-conjugate dipeptidase) (EC 3.4.13.23) (Leucine aminopeptidase 3) (LAP-3) (Leucyl aminopeptidase) (Peptidase S) (Proline aminopeptidase) (EC 3.4.11.5) (Prolyl aminopeptidase)	Lap3	13	1.05331e+06	939949	1.23508e+06	1.45979e+06	1.15568e+06	909664	965975	1.03839e+06	1.18799e+06	1.13914e+06	1.34079e+06	1.79632e+06	1.28415e+06	1365654	1.81152e+06	1.28269e+06	1.03666e+06	1.25535e+06	1.35492e+06	MOUSE
Q9DBJ1	Phosphoglycerate mutase 1 (EC 5.4.2.11) (EC 5.4.2.4) (BPG-dependent PGAM 1) (Phosphoglycerate mutase isozyme B) (PGAM-B)	Pgam1	11	2580672	2.63956e+06	3106095	3.5563e+06	3.75703e+06	4283135	3699649	2923598	3.21525e+06	3.24834e+06	3.48369e+06	3.3315e+06	3.40187e+06	2789164	3.91161e+06	3.18912e+06	3.20474e+06	4.01397e+06	4.12652e+06	MOUSE
F8WIV2	Serine (or cysteine) peptidase inhibitor, clade B, member 6a	Serpinb6a	15	1.7093e+06	1.75634e+06	2.1161e+06	2.55837e+06	3.93841e+06	4.03372e+06	3.53835e+06	2.08938e+06	2075956	2.15161e+06	2.57091e+06	2.11344e+06	1.88908e+06	1.74231e+06	2.31783e+06	1.83545e+06	1.73337e+06	2.16784e+06	2318171	MOUSE
Z4YJW0	ER membrane protein complex subunit 1	Emc1	7	152446	146108	193015	213900	193765	114135	113549	148124	142868	189285	213375	153081	152369	161906	183127	172901	131979	187491	187341	MOUSE
G3X914	Cullin-5	Cul5	5	137319	129176	115176	183790	128800	149923	146579	137912	148663	102128	162943	128640	142020	102514	143730	108881	134070	164421	174602	MOUSE
Q3TW96	UDP-N-acetylhexosamine pyrophosphorylase-like protein 1 (EC 2.7.7.-)	Uap1l1	8	873893	699483	1.06682e+06	1.22708e+06	2.11293e+06	1744233	1.73574e+06	1.01732e+06	920366	1.19217e+06	1.31698e+06	1.25701e+06	1.095e+06	1.07402e+06	1.43343e+06	984225	886229	1102746	1.21213e+06	MOUSE
Q3UDE2	Tubulin--tyrosine ligase-like protein 12 (Inactive tubulin--tyrosine ligase-like protein 12)	Ttll12	11	593607	606223	743879	875198	863218	862104	731314	778710	599669	832711	972290	885161	835147	799916	1.06948e+06	1.01737e+06	866765	1.16232e+06	1.27629e+06	MOUSE
Q9CZ30	Obg-like ATPase 1 (GTP-binding protein 9)	Ola1	9	750260	708071	910358	1.13219e+06	1.07561e+06	881288	983200	978202	952404	1.08996e+06	1.24116e+06	1.10294e+06	1.0945e+06	997666	1.35755e+06	965216	882123	1.17701e+06	1.20989e+06	MOUSE
Q8BH64	EH domain-containing protein 2	Ehd2	10	365833	326015	441091	500659	1043964	766695	1.14333e+06	178843	262153	287349	390095	363050	478207	339297	639273	465357	549079	720549	716002	MOUSE
Q6P542	ATP-binding cassette sub-family F member 1	Abcf1	7	460224	463980	565662	641855	300544	385198	431131	489516	540168	591558	720620	276505	350195	270899	332001	290494	342440	408356	331228	MOUSE
P07742	Ribonucleoside-diphosphate reductase large subunit (EC 1.17.4.1) (Ribonucleoside-diphosphate reductase subunit M1) (Ribonucleotide reductase large subunit)	Rrm1	8	181736	179928	285709	286930	159222	123310	143117	120254	168312	138400	182604	314063	270262	269980	320249	248971	191576	251806	258381	MOUSE
Q60598	Src substrate cortactin	Cttn	10	687933	684442	849010	892982	1.0391e+06	1.15187e+06	1.06507e+06	624658	664590	763254	774838	780099	824494	676270	988497	851445	879768	1.00286e+06	1.02408e+06	MOUSE
Q9DBG6	Dolichyl-diphosphooligosaccharide--protein glycosyltransferase subunit 2 (Dolichyl-diphosphooligosaccharide--protein glycosyltransferase 63 kDa subunit) (Ribophorin II) (RPN-II) (Ribophorin-2)	Rpn2	13	1.18673e+06	961601	1.15445e+06	1.15196e+06	402239	541332	649911	913620	973136	1.19062e+06	1.3339e+06	675334	703398	733912	740399	529745	557305	812317	417757	MOUSE
P55937	Golgin subfamily A member 3 (Golgin-160) (Male-enhanced antigen 2) (MEA-2)	Golga3	3	53366.5	23715.1	49879.4	107192	31841.9	58295.6	67829.4	34653.4	44495.6	65423.5	69419.3	86294.5	39958	161849	95265.9	94391.2	62273.7	52046.6	44327.3	MOUSE
A0A498WGK2	Asparagine--tRNA ligase (EC 6.1.1.22)	Nars	13	1.58669e+06	1.55977e+06	1.96578e+06	2.12163e+06	1.5517e+06	1.63065e+06	1478600	1.83573e+06	1.96124e+06	2.16007e+06	2.35945e+06	1.32317e+06	1.42788e+06	1.24531e+06	1.59703e+06	1.20976e+06	1.18694e+06	1.53607e+06	1.52869e+06	MOUSE
P26043	Radixin (ESP10)	Rdx	5	288942	177668	251271	328305	256895	265687	266620	181802	280486	185533	298686	272474	269411	169974	266348	262740	211580	294969	332081	MOUSE
Q5SYD0	Unconventional myosin-Id	Myo1d	7	191406	139901	205645	148268	262149	255130	246093	127423	143927	206145	183618	232748	197495	149980	232488	189486	184130	129844	226928	MOUSE
Q9Z1N5	Spliceosome RNA helicase Ddx39b (EC 3.6.4.13) (56 kDa U2AF65-associated protein) (DEAD box protein UAP56) (HLA-B-associated transcript 1 protein)	Ddx39b	4	151050	97070	169883	193000	230990	98620.5	220518	118085	140382	160782	206828	190862	152498	159648	165186	233742	172870	170884	193351	MOUSE
Q8BJW6	Eukaryotic translation initiation factor 2A (eIF-2A) [Cleaved into: Eukaryotic translation initiation factor 2A, N-terminally processed]	Eif2a	11	506808	411894	647763	739668	513487	563668	567145	610803	679462	723052	669188	546383	542750	416658	621918	589219	554211	691133	672706	MOUSE
Q99KC8	von Willebrand factor A domain-containing protein 5A (Loss of heterozygosity 11 chromosomal region 2 gene A protein homolog)	Vwa5a	10	344813	311505	388901	498649	600356	554459	554497	304328	269172	325081	399684	364891	374120	342590	386531	394456	354061	458929	467946	MOUSE
E9Q5B5	Hexokinase (EC 2.7.1.1)	Hk2	5	159319	152249	168302	217666	194630	180684	160729	202300	177079	180110	247258	188698	188322	156581	222731	198965	202008	208634	229687	MOUSE
Q8CI94	Glycogen phosphorylase, brain form (EC 2.4.1.1)	Pygb	7	109609	151666	184687	211246	308765	282734	209635	132614	150353	213488	204501	197831	237776	217024	281871	213292	167532	221816	266583	MOUSE
Q3UNN4	SWI/SNF complex subunit SMARCC1	Smarcc1	2	52122.2	25479.1	44722.5	53476	42447.4	28430.3	46162.3	41381.5	45064.6	40536.7	60073.3	58516.6	53457.3	59608.6	68674.5	73895.1	66564.4	75676.9	68066.3	MOUSE
E9QN31	Probable 28S rRNA (cytosine-C(5))-methyltransferase	Nop2	9	463887	485855	543462	588009	422317	441125	414518	584908	582728	681000	824112	506620	462167	451267	563049	791177	614796	663319	707007	MOUSE
Q3TUE1	Far upstream element-binding protein 1	Fubp1	12	910089	984200	1.21476e+06	1.45497e+06	1.30702e+06	1.31039e+06	1.22968e+06	974029	963282	1.05599e+06	1.2421e+06	1421911	1.29712e+06	1.11639e+06	1.72784e+06	1.73e+06	1.50499e+06	1.86253e+06	1.96433e+06	MOUSE
Q8BWY3	Eukaryotic peptide chain release factor subunit 1 (Eukaryotic release factor 1) (eRF1)	Etf1	9	665499	682443	862097	1.04943e+06	755060	815953	752385	746781	784225	837551	1.08313e+06	667726	706008	584190	841089	682843	623693	866612	882200	MOUSE
P06801	NADP-dependent malic enzyme (NADP-ME) (EC 1.1.1.40) (Malic enzyme 1)	Me1	12	788033	781328	967331	1.176e+06	795666	709332	777061	813696	835344	897341	1.07433e+06	785714	794950	755708	819265	901648	765295	1.10846e+06	1.05587e+06	MOUSE
Q9CZU6	Citrate synthase, mitochondrial (EC 2.3.3.1) (Citrate (Si)-synthase)	Cs	12	3.81165e+06	3209880	4113347	5.12908e+06	4867113	3.65885e+06	3.24371e+06	3.54703e+06	3647068	4272195	4.72239e+06	5467701	4.89759e+06	4.44981e+06	6.0998e+06	5.03282e+06	3979904	4.09723e+06	5054002	MOUSE
Q6A0A9	Constitutive coactivator of PPAR-gamma-like protein 1 (Oxidative stress-associated Src activator) (Protein FAM120A)	FAM120A	10	255605	231754	273032	331913	283160	320648	261170	308842	265853	291742	368245	283598	223089	261889	384150	223337	245794	243484	298271	MOUSE
P62192	26S proteasome regulatory subunit 4 (P26s4) (26S proteasome AAA-ATPase subunit RPT2) (Proteasome 26S subunit ATPase 1)	Psmc1	13	905751	923655	982275	1.01348e+06	807601	845210	903511	769098	1.01329e+06	1.01732e+06	989047	680174	721535	591148	685543	909289	660000	1.02766e+06	723683	MOUSE
Q9D819	Inorganic pyrophosphatase (EC 3.6.1.1) (Pyrophosphate phospho-hydrolase) (PPase)	Ppa1	13	1.89688e+06	1.91141e+06	2303170	2.84153e+06	1.88492e+06	1.69208e+06	1539833	2.39639e+06	2.45846e+06	2429872	2946628	2.44939e+06	2.05834e+06	2071745	2639440	2.13666e+06	1.76654e+06	2.28248e+06	2.48232e+06	MOUSE
Q3TAQ9	WD repeat domain 36	Wdr36	10	279320	324531	205563	239493	234429	144572	141541	295978	269876	391357	532559	312768	245530	321255	439090	508714	257565	282998	283726	MOUSE
Q9D2R0	Acetoacetyl-CoA synthetase (EC 6.2.1.16)	Aacs	9	764795	684390	882886	1.14292e+06	1.14493e+06	1.09732e+06	934036	747632	771431	818068	1.09538e+06	955432	939306	860387	1242892	819335	741855	946476	1.02491e+06	MOUSE
Q80U93	Nuclear pore complex protein Nup214 (214 kDa nucleoporin) (Nucleoporin Nup214)	Nup214	7	135920	116204	134947	158942	139001	182944	166451	123209	106827	76348.6	146887	216403	194094	177396	237434	251746	207701	203545	214018	MOUSE
Q8CH18	Cell division cycle and apoptosis regulator protein 1 (Cell cycle and apoptosis regulatory protein 1) (CARP-1)	Ccar1	8	211859	153419	270788	289479	242734	294604	239079	239363	224000	226903	282141	312133	267169	270666	382153	369554	308165	316003	360966	MOUSE
Q6A068	Cell division cycle 5-like protein (Cdc5-like protein)	Cdc5l	9	291111	275413	360942	444203	312602	297043	364133	304126	309425	369874	431362	265374	296745	336903	390916	416761	366417	391037	412149	MOUSE
K3W4L0	Unconventional myosin-XVIIIa	Myo18a	3	16919.3	23410.3	26984.5	33369.6	32160	30019.1	21166.1	19144.1	30282	30426.3	39492.4	17748.7	22184.4	10419.5	21719.4	15756	34703.7	40259.8	38395	MOUSE
Q91VC3	Eukaryotic initiation factor 4A-III (eIF-4A-III) (eIF4A-III) (EC 3.6.4.13) (ATP-dependent RNA helicase DDX48) (ATP-dependent RNA helicase eIF4A-3) (DEAD box protein 48) (Eukaryotic translation initiation factor 4A isoform 3) [Cleaved into: Eukaryotic initiation factor 4A-III, N-terminally processed]	Eif4a3	15	1.21962e+06	1.1647e+06	1.21241e+06	1.58581e+06	1437353	1.31442e+06	1.39241e+06	1217848	1.30113e+06	1.40769e+06	1511750	1.62746e+06	1.45605e+06	1.46576e+06	1.97578e+06	2.28283e+06	1.73709e+06	2.06418e+06	2.06841e+06	MOUSE
Q810A7	ATP-dependent RNA helicase DDX42 (EC 3.6.4.13) (DEAD box protein 42)	Ddx42	12	432481	358968	475969	619028	592400	501117	523604	408880	414688	448839	541403	537336	414792	454864	612406	820304	608854	822011	846240	MOUSE
E9Q3G8	Nucleoporin 153	Nup153	6	105837	130405	134186	172634	157291	100418	127299	130184	113816	136315	161045	156738	119479	123933	131196	193030	80708.7	136196	138460	MOUSE
Q9WUA2	Phenylalanine--tRNA ligase beta subunit (EC 6.1.1.20) (Phenylalanyl-tRNA synthetase beta subunit) (PheRS)	Farsb	10	624030	574094	708676	983445	1.07074e+06	932491	912044	787442	849938	901560	998508	599449	804475	734218	819429	855758	949908	1.02307e+06	1.094e+06	MOUSE
P70227	Inositol 1,4,5-trisphosphate receptor type 3 (IP3 receptor isoform 3) (IP3R 3) (InsP3R3) (Type 3 inositol 1,4,5-trisphosphate receptor) (Type 3 InsP3 receptor)	Itpr3	4	62842.7	68286.5	90206.8	101673	91637.4	138512	150190	54205.9	58165.5	94123.1	99312	66148.7	71229.6	61924.4	72509.6	80939.2	27967.2	53881.2	66854.8	MOUSE
P60229	Eukaryotic translation initiation factor 3 subunit E (eIF3e) (Eukaryotic translation initiation factor 3 subunit 6) (MMTV integration site 6) (Mammary tumor-associated protein INT-6) (Viral integration site protein INT-6) (eIF-3 p48)	Eif3e	13	1.23658e+06	1.24757e+06	1.47631e+06	1.84145e+06	1.45655e+06	1.47455e+06	1.46622e+06	1.29313e+06	1.34059e+06	1.45111e+06	1.65627e+06	1.29193e+06	1.40275e+06	1.21583e+06	1.56653e+06	1.53592e+06	1.47087e+06	1.93193e+06	1.82783e+06	MOUSE
P62702	40S ribosomal protein S4, X isoform	Rps4x	11	2.03514e+06	2.02796e+06	2.44774e+06	3.04373e+06	2.11158e+06	1.80613e+06	1.70605e+06	2247038	2.29604e+06	2.31638e+06	2684547	2.44583e+06	1.88935e+06	1.68287e+06	2.4192e+06	1.91993e+06	1.42737e+06	2260598	2465447	MOUSE
Q922J3	CAP-Gly domain-containing linker protein 1 (Cytoplasmic linker protein 170) (CLIP-170) (Restin)	Clip1	7	59294.6	69575.4	94668	98716.6	101574	110850	97474.3	60657	53967	65579.2	108150	112956	119950	105202	127437	139950	119617	137805	92653.6	MOUSE
Q8R2P8	Lysine--tRNA ligase (EC 6.1.1.6) (Lysyl-tRNA synthetase)	Kars	11	1.10515e+06	1.07316e+06	1.32709e+06	1.74005e+06	1.30479e+06	1277863	1164835	1269079	1.24183e+06	1.36768e+06	1.65953e+06	1.21556e+06	1.15831e+06	1.10873e+06	1.42475e+06	1.59754e+06	1.38798e+06	1.79978e+06	1.8781e+06	MOUSE
O09131	Glutathione S-transferase omega-1 (GSTO-1) (EC 2.5.1.18) (Glutathione S-transferase omega 1-1) (GSTO 1-1) (Glutathione-dependent dehydroascorbate reductase) (EC 1.8.5.1) (Monomethylarsonic acid reductase) (MMA(V) reductase) (EC 1.20.4.2) (S-(Phenacyl)glutathione reductase) (SPG-R) (p28)	Gsto1	10	2.70303e+06	2239379	3029597	3.71053e+06	3.91765e+06	3.0778e+06	3.23172e+06	3.67544e+06	3236994	3845222	4461231	2.80946e+06	2.41684e+06	2.34962e+06	3.22875e+06	2914951	2.7157e+06	3.58237e+06	3.7285e+06	MOUSE
Q9D0K2	Succinyl-CoA:3-ketoacid coenzyme A transferase 1, mitochondrial (EC 2.8.3.5) (3-oxoacid CoA-transferase 1) (Somatic-type succinyl-CoA:3-oxoacid CoA-transferase) (SCOT-s)	Oxct1	12	2108204	1.6421e+06	2.43555e+06	2.56093e+06	2514175	1.77658e+06	2.04025e+06	1.84287e+06	1.68347e+06	2.16741e+06	2.3077e+06	3.31367e+06	2.87004e+06	2.9972e+06	3.64024e+06	2.51014e+06	2.10365e+06	2.13256e+06	2280149	MOUSE
P97429	Annexin A4 (Annexin IV) (Annexin-4)	Anxa4	11	643713	568905	1.17856e+06	999358	2.57e+06	2.08622e+06	2159088	1.34278e+06	1.36001e+06	1.48229e+06	1.65913e+06	1784861	1647660	1.44289e+06	1.99425e+06	842710	688332	922134	1.01552e+06	MOUSE
P97807	Fumarate hydratase, mitochondrial (Fumarase) (EC 4.2.1.2) (EF-3)	Fh	10	1.034e+06	846374	1.15762e+06	1.22394e+06	936058	708189	768281	984002	918141	1.07277e+06	1239627	1.22706e+06	986841	1.03328e+06	1.29386e+06	1.23249e+06	963799	1.00842e+06	1.15504e+06	MOUSE
Q8K0D5	Elongation factor G, mitochondrial (EF-Gmt) (Elongation factor G 1, mitochondrial) (mEF-G 1) (Elongation factor G1)	Gfm1	7	289169	214391	325474	436740	320908	245113	247842	367373	338766	383293	481911	453229	341401	386756	441658	362959	317872	343731	395753	MOUSE
Q99PU8	ATP-dependent RNA helicase DHX30 (EC 3.6.4.13) (DEAH box protein 30)	Dhx30	7	158914	133321	169666	225966	120512	98713.2	111776	148002	153157	185743	199281	132445	121350	119644	166023	118494	116693	125216	176469	MOUSE
Q9D8E6	60S ribosomal protein L4	Rpl4	16	3930162	3.78019e+06	4.8379e+06	3977318	4771442	4870737	4.11911e+06	4342316	4483597	4415702	4916207	5215828	4.467e+06	4.0631e+06	5661712	5.11337e+06	4352213	5.60051e+06	5.74571e+06	MOUSE
P51174	Long-chain specific acyl-CoA dehydrogenase, mitochondrial (LCAD) (EC 1.3.8.8)	Acadl	10	447242	354190	472415	831097	1.1853e+06	1.04762e+06	910216	569009	451159	501083	955636	1.10228e+06	966419	656021	1.39166e+06	1.26818e+06	1.05754e+06	1.08065e+06	1.20294e+06	MOUSE
Q99K85	Phosphoserine aminotransferase (PSAT) (EC 2.6.1.52) (Endometrial progesterone-induced protein) (EPIP) (Phosphohydroxythreonine aminotransferase)	Psat1	16	5591603	5.65032e+06	6686927	8536567	6.70917e+06	6.16251e+06	5387156	6455029	6.48659e+06	6974151	7839865	6169618	5.45522e+06	4.71333e+06	6.84867e+06	6074194	5.10991e+06	6.81886e+06	7431644	MOUSE
O70400	PDZ and LIM domain protein 1 (C-terminal LIM domain protein 1) (Elfin) (LIM domain protein CLP-36)	Pdlim1	9	1.22048e+06	1.26485e+06	1.43801e+06	1.42609e+06	1.19928e+06	1.49112e+06	1.14254e+06	1.0658e+06	1310653	1.28446e+06	1.49682e+06	1.3949e+06	1.0824e+06	967945	1.50284e+06	1.12611e+06	1.0351e+06	1.26548e+06	1.28936e+06	MOUSE
Q8BK64	Activator of 90 kDa heat shock protein ATPase homolog 1 (AHA1)	Ahsa1	12	842979	850501	986131	1.2884e+06	850129	921367	846694	938243	990185	1.06726e+06	1.1627e+06	977095	962854	838849	1.17652e+06	1.02118e+06	907934	1153321	1231112	MOUSE
Q6PGL7	WASH complex subunit 2	Washc2	5	55561.8	56985.6	67162.1	66797.6	88598.7	78193.9	78780.5	51363	62891.9	62660.4	69637	46835.4	66949.2	49912.4	82635.9	47761.4	47500.8	68708.9	52742.9	MOUSE
Q3UHU8	General transcription factor II-I	Gtf2i	6	148724	201943	178083	199024	175889	156392	190575	126005	179928	205877	243923	177102	200094	213596	242151	209959	246241	206001	230372	MOUSE
Q3U4X8	DNA ligase (EC 6.5.1.1)	Lig1	4	77006.9	1.92458e+06	1.23276e+06	100894	2.19668e+06	85848.2	108021	73277.6	56386.9	64650.1	2186764	88282	2.3345e+06	87646.2	2.45988e+06	134152	121991	127212	147549	MOUSE
P32067	Lupus La protein homolog (La autoantigen homolog) (La ribonucleoprotein)	Ssb	13	1.1492e+06	1.00033e+06	1.45419e+06	1.53629e+06	1.11447e+06	874982	1.06203e+06	1.08975e+06	1.19467e+06	1315699	1484866	1403608	1161962	1115137	1.37542e+06	1.28227e+06	1.19409e+06	1.44936e+06	1.4507e+06	MOUSE
Q8BGJ5	Polypyrimidine tract-binding protein 1	Ptbp1	12	3.28896e+06	2.75007e+06	3.80327e+06	4568214	4519290	2.5448e+06	4361506	3.48791e+06	3.50938e+06	3.76104e+06	4401776	4337767	4.31182e+06	4.08289e+06	5238701	5.63293e+06	4754793	5.18877e+06	5184659	MOUSE
Q8CGF7	Transcription elongation regulator 1 (Formin-binding protein 28) (FBP 28) (TATA box-binding protein-associated factor 2S) (Transcription factor CA150) (p144)	Tcerg1	8	270836	283678	306854	399380	372686	361223	326006	289297	314434	319602	372895	308290	340180	300777	373561	395552	330179	397003	418717	MOUSE
P63085	Mitogen-activated protein kinase 1 (MAP kinase 1) (MAPK 1) (EC 2.7.11.24) (ERT1) (Extracellular signal-regulated kinase 2) (ERK-2) (MAP kinase isoform p42) (p42-MAPK) (Mitogen-activated protein kinase 2) (MAP kinase 2) (MAPK 2)	Mapk1	6	365733	392257	431888	538041	399154	408507	391466	326345	368672	352442	445349	324578	470765	347444	461447	366281	335561	498544	496729	MOUSE
P62137	Serine/threonine-protein phosphatase PP1-alpha catalytic subunit (PP-1A) (EC 3.1.3.16)	Ppp1ca	3	281983	284700	313677	379601	468011	493916	423685	315846	341475	354209	374265	382679	382659	295430	400559	382244	335407	403771	407304	MOUSE
Q8K1R3	Polyribonucleotide nucleotidyltransferase 1, mitochondrial (EC 2.7.7.8) (3'-5' RNA exonuclease OLD35) (PNPase old-35) (Polynucleotide phosphorylase 1) (PNPase 1) (Polynucleotide phosphorylase-like protein)	Pnpt1	3	89416.5	65916.3	83390	69582.9	84726	84082	170725	70650.8	64060.7	108059	71383.8	101600	96280.1	88134.3	97848.4	97156.7	57725.1	97039	100745	MOUSE
Q8C8U0	Liprin-beta-1 (Protein tyrosine phosphatase receptor type f polypeptide-interacting protein-binding protein 1) (PTPRF-interacting protein-binding protein 1)	Ppfibp1	6	188411	157807	168969	228750	286773	237659	240663	187374	173821	210493	150929	248424	259723	248737	284486	167951	141472	168646	178548	MOUSE
Q5SWN2	Replication protein A subunit	Rpa1	6	145421	153342	184653	243905	226732	202041	209853	180148	180773	197937	225864	227912	222508	199487	284085	290755	254295	310664	323482	MOUSE
P67778	Prohibitin (B-cell receptor-associated protein 32) (BAP 32)	Phb	15	3.315e+06	2928454	3.73566e+06	4.4902e+06	5.21299e+06	5090133	4651018	4276435	4.11401e+06	4734804	5396291	6209388	5443886	5.39694e+06	7141150	7.29425e+06	5628297	5785289	5875013	MOUSE
Q9DCN2	NADH-cytochrome b5 reductase 3 (B5R) (Cytochrome b5 reductase) (EC 1.6.2.2) (Diaphorase-1) [Cleaved into: NADH-cytochrome b5 reductase 3 membrane-bound form;NADH-cytochrome b5 reductase 3 soluble form]	Cyb5r3	11	2111597	1.92829e+06	2154431	2.73974e+06	1.56673e+06	1855506	1.96421e+06	1.74526e+06	1.80673e+06	2252257	2341075	1.53551e+06	1.24953e+06	1.53679e+06	1.33569e+06	1.6099e+06	1.90465e+06	2.06021e+06	1.56525e+06	MOUSE
B2RY56	RNA-binding protein 25 (RNA-binding motif protein 25)	Rbm25	8	240586	222115	263604	305420	356701	361945	334201	193383	246597	289430	302762	323272	344079	318150	416253	491216	436817	453150	437971	MOUSE
Q6GT24	Peroxiredoxin-6 (EC 1.11.1.27)	Prdx6	14	3.45719e+06	3027538	4014346	4.78675e+06	3084293	2.37321e+06	2649348	3.65556e+06	3.41175e+06	3.79886e+06	4.39642e+06	3.31839e+06	2.90822e+06	2.81354e+06	3.71593e+06	3.1451e+06	2.7052e+06	3.49545e+06	3797357	MOUSE
Q9JIG7	Coiled-coil domain-containing protein 22	Ccdc22	10	179015	145855	242089	304623	276875	286724	267576	203233	148790	220444	197199	241282	174759	184420	268249	250425	205423	273209	284225	MOUSE
Q64511	DNA topoisomerase 2-beta (EC 5.6.2.2) (DNA topoisomerase II, beta isozyme)	Top2b	6	172222	118232	172997	276558	291529	134287	140099	173276	131182	165481	223222	112290	83799.5	136320	115030	151411	93712.5	145650	79749.2	MOUSE
A0A5K1VVS7	Protein unc-45 homolog A	Unc45a	6	100606	85359.9	129437	200622	114416	120028	96468.6	100358	119102	106116	129176	102354	103885	107763	166388	136301	67973.3	84089.7	146530	MOUSE
Q9EQQ9	Protein O-GlcNAcase (OGA) (EC 3.2.1.169) (Beta-N-acetylhexosaminidase) (Beta-hexosaminidase) (Bifunctional protein NCOAT) (Meningioma-expressed antigen 5) (N-acetyl-beta-D-glucosaminidase) (N-acetyl-beta-glucosaminidase)	Oga	7	176678	159276	204366	262434	333619	288383	240930	236941	238489	279504	313448	316725	301833	292286	332258	244805	237122	259253	252124	MOUSE
Q921N6	Probable ATP-dependent RNA helicase DDX27 (EC 3.6.4.13) (DEAD box protein 27)	Ddx27	6	184234	190780	369686	345225	277441	638732	286682	279823	287350	278452	435654	358139	331775	359067	476110	441092	293899	366261	385556	MOUSE
P09055	Integrin beta-1 (Fibronectin receptor subunit beta) (VLA-4 subunit beta) (CD antigen CD29)	Itgb1	12	1.3917e+06	1286404	1.4171e+06	1.85167e+06	1237100	1.20326e+06	1.26105e+06	1106263	1.19266e+06	1.33106e+06	1.46932e+06	1.18767e+06	1.04607e+06	1.13769e+06	1.17892e+06	1.03469e+06	982514	1.07879e+06	814098	MOUSE
P29758	Ornithine aminotransferase, mitochondrial (EC 2.6.1.13) (Ornithine--oxo-acid aminotransferase)	Oat	14	1.45048e+06	1.42023e+06	1.72262e+06	2.89385e+06	1765791	1.59843e+06	1.12761e+06	1.42784e+06	1.31098e+06	1.39567e+06	1678091	1.98468e+06	1.70218e+06	1.76509e+06	2262714	1.68791e+06	1425893	1.60801e+06	2.60654e+06	MOUSE
Q99LF4	RNA-splicing ligase RtcB homolog (EC 6.5.1.8) (3'-phosphate/5'-hydroxy nucleic acid ligase) (Focal adhesion-associated protein) (FAAP)	Rtcb	12	999197	994588	1.1857e+06	1.48148e+06	1.2123e+06	1.10563e+06	1025740	1.07141e+06	1.06031e+06	1.13178e+06	1.32967e+06	1.17057e+06	1.14028e+06	1.04868e+06	1.34336e+06	1.26223e+06	1.13706e+06	1.42307e+06	1.45144e+06	MOUSE
B9EHJ3	Tight junction protein ZO-1 (Tjp1 protein)	Tjp1	4	49757.9	72253.6	62615.2	69667	90188.9	89609.8	83585.7	45573	43604.2	49653.6	58026.8	64918.5	34661	26119.6	66888.6	89871.4	74515.1	81195.7	77629.3	MOUSE
P54822	Adenylosuccinate lyase (ASL) (EC 4.3.2.2) (Adenylosuccinase) (ASase)	Adsl	16	1.09171e+06	969281	1.26413e+06	1.44313e+06	1618836	1373924	1.39235e+06	1.24626e+06	1.15555e+06	1.37274e+06	1.53081e+06	1486996	1.29397e+06	1.25972e+06	1.51131e+06	1.84382e+06	1.62559e+06	2.11092e+06	2.28853e+06	MOUSE
O35857	Mitochondrial import inner membrane translocase subunit TIM44	Timm44	8	251431	203996	252779	338037	318593	285597	239487	255928	264292	265061	340501	329344	359309	293919	406842	367189	291066	315226	314298	MOUSE
Q80WJ7	Protein LYRIC (3D3/LYRIC) (Lysine-rich CEACAM1 co-isolated protein) (Metadherin) (Metastasis adhesion protein)	Mtdh	8	305883	267622	338951	355870	143668	187789	176626	242005	268838	337854	436619	144166	172951	170514	215853	126079	170620	241322	159654	MOUSE
E9Q912	Rap1 GTPase-GDP dissociation stimulator 1	Rap1gds1	14	326181	389857	518846	574392	579628	551258	523796	526909	520501	580966	704819	493306	452865	408289	558950	463223	385709	499437	559922	MOUSE
Q921F4	Heterogeneous nuclear ribonucleoprotein L-like	Hnrnpll	5	152787	103886	178116	165718	190549	187401	173573	137573	152241	158287	184245	182887	160767	149906	213957	199449	176316	205282	192233	MOUSE
Q9DBE9	pre-rRNA 2'-O-ribose RNA methyltransferase FTSJ3 (EC 2.1.1.-) (Protein ftsJ homolog 3) (Putative rRNA methyltransferase 3)	Ftsj3	10	181643	189093	204957	280330	350427	234531	339294	424282	270906	266766	344019	289872	229808	361514	244489	386879	280514	346557	231191	MOUSE
D3Z7P3	Glutaminase kidney isoform, mitochondrial (GLS) (EC 3.5.1.2) [Cleaved into: Glutaminase kidney isoform, mitochondrial 68 kDa chain;Glutaminase kidney isoform, mitochondrial 65 kDa chain]	Gls	10	269335	127597	295600	343394	344882	222364	282328	232526	230662	386712	381864	351960	316595	414178	473720	292264	220975	322123	179544	MOUSE
P43247	DNA mismatch repair protein Msh2 (MutS protein homolog 2)	Msh2	7	130190	134947	164223	218151	238858	119956	210907	218812	220433	212306	267974	191611	187268	170258	228420	277837	211660	313141	288984	MOUSE
Q60953	Protein PML	Pml	10	649077	260625	354133	454029	543912	476073	546619	263860	230987	239121	275505	563950	517137	354754	688392	727972	576500	597485	630918	MOUSE
Q5EBP8	Helix-destabilizing protein (Heterogeneous nuclear ribonucleoprotein A1) (Heterogeneous nuclear ribonucleoprotein A1, N-terminally processed) (hnRNP core protein A1)	Hnrnpa1	9	5544501	4.96062e+06	6100087	7250927	6760996	5265151	5961963	5.27531e+06	5275666	5.78318e+06	6983775	7380816	6904362	6631977	8579236	9799136	7.58088e+06	8246353	8663145	MOUSE
Q8CIB5	Fermitin family homolog 2 (Kindlin-2) (Pleckstrin homology domain-containing family C member 1)	Fermt2	6	145739	164780	201732	217499	134011	102070	162409	134086	141838	166722	182646	104495	137395	102480	130128	103157	140563	148060	112200	MOUSE
F8VPK5	Rho-associated protein kinase (EC 2.7.11.1)	Rock2	5	70757.8	111646	117198	109303	155402	143375	139510	69770.6	89305	94242.2	133480	147399	71057.9	100582	149110	129152	117618	114259	104792	MOUSE
P18654	Ribosomal protein S6 kinase alpha-3 (S6K-alpha-3) (EC 2.7.11.1) (90 kDa ribosomal protein S6 kinase 3) (p90-RSK 3) (p90RSK3) (MAP kinase-activated protein kinase 1b) (MAPK-activated protein kinase 1b) (MAPKAP kinase 1b) (MAPKAPK-1b) (Ribosomal S6 kinase 2) (RSK-2) (pp90RSK2)	Rps6ka3	9	226439	210245	250893	310172	254464	206018	261156	235953	197769	262134	275964	206871	212137	150154	243825	138963	171698	253281	239081	MOUSE
Q8BMD8	Calcium-binding mitochondrial carrier protein SCaMC-1 (Small calcium-binding mitochondrial carrier protein 1) (Solute carrier family 25 member 24)	Slc25a24	8	401863	450254	517974	654135	802292	683348	737852	532508	618521	727718	829289	725340	686118	591708	915891	647274	527912	592993	606973	MOUSE
Q9JLV1	BAG family molecular chaperone regulator 3 (BAG-3) (Bcl-2-associated athanogene 3) (Bcl-2-binding protein Bis)	Bag3	6	209938	222166	273928	331208	285436	283115	255278	195107	198494	172822	243067	279156	271408	182727	330689	316411	273526	362525	368698	MOUSE
Q9JLQ0	CD2-associated protein (Mesenchyme-to-epithelium transition protein with SH3 domains 1) (METS-1)	Cd2ap	6	154973	159501	184464	263470	226040	216902	192144	194753	188516	216060	282025	238362	197999	155380	211822	224295	206848	293889	269815	MOUSE
P46664	Adenylosuccinate synthetase isozyme 2 (AMPSase 2) (AdSS 2) (EC 6.3.4.4) (Adenylosuccinate synthetase, acidic isozyme) (Adenylosuccinate synthetase, liver isozyme) (L-type adenylosuccinate synthetase) (IMP--aspartate ligase 2)	Adss2	9	777400	739131	926400	1.1856e+06	819678	711865	704185	771604	788446	803831	936333	936538	831576	767530	1.00287e+06	981041	820012	1.09284e+06	1.12726e+06	MOUSE
O55201	Transcription elongation factor SPT5 (DRB sensitivity-inducing factor large subunit) (DSIF large subunit)	Supt5h	5	93866.9	69486.5	151480	136910	140546	142822	115512	138681	116101	126724	158225	128904	131888	95881.8	152369	183492	152174	153539	167943	MOUSE
Q9Z2I8	Succinate--CoA ligase [GDP-forming] subunit beta, mitochondrial (EC 6.2.1.4) (GTP-specific succinyl-CoA synthetase subunit beta) (G-SCS) (GTPSCS) (Succinyl-CoA synthetase beta-G chain) (SCS-betaG)	Suclg2	10	649728	631479	790573	933026	1.16366e+06	1.07175e+06	965766	981756	867985	1.06064e+06	1311484	1178141	938062	1.01782e+06	1.30912e+06	1.22113e+06	944194	1.00835e+06	1.17348e+06	MOUSE
Q8K297	Procollagen galactosyltransferase 1 (EC 2.4.1.50) (Collagen beta(1-O)galactosyltransferase 1) (Glycosyltransferase 25 family member 1) (Hydroxylysine galactosyltransferase 1)	Colgalt1	7	277421	285216	339529	265496	197665	311217	228076	325464	280718	328620	340869	425026	377158	423339	402832	249252	322411	286532	298249	MOUSE
Q8BMF4	Dihydrolipoyllysine-residue acetyltransferase component of pyruvate dehydrogenase complex, mitochondrial (EC 2.3.1.12) (Dihydrolipoamide acetyltransferase component of pyruvate dehydrogenase complex) (Pyruvate dehydrogenase complex component E2) (PDC-E2) (PDCE2)	Dlat	11	931326	738316	1.02373e+06	1221964	991634	764582	761716	978842	868352	986561	1.22718e+06	1.17173e+06	834159	965124	1.19848e+06	787958	629228	676586	798280	MOUSE
Q810B6	Rabankyrin-5 (Rank-5) (Ankyrin repeat and FYVE domain-containing protein 1) (Ankyrin repeats hooked to a zinc finger motif)	Ankfy1	3	37585.2	35878.5	56569.5	57531.5	90330.6	86512.5	68715.8	37594.3	36568.8	57088.5	42226.4	55209.5	67855.4	50988.6	94510.5	55050	39749	61688.1	83204.5	MOUSE
Q99JY0	Trifunctional enzyme subunit beta, mitochondrial (TP-beta) [Includes: 3-ketoacyl-CoA thiolase (EC 2.3.1.155) (EC 2.3.1.16) (Acetyl-CoA acyltransferase) (Beta-ketothiolase)]	Hadhb	12	648414	571859	738283	814834	783710	773911	756329	528460	554096	646745	700072	711980	680895	664342	888029	1.03748e+06	961297	956949	981243	MOUSE
P60122	RuvB-like 1 (EC 3.6.4.12) (49 kDa TATA box-binding protein-interacting protein) (49 kDa TBP-interacting protein) (DNA helicase p50) (Pontin 52) (TIP49a)	Ruvbl1	14	1.48493e+06	1.37656e+06	1.66858e+06	2.0988e+06	2.06154e+06	1.95955e+06	1779039	1.90063e+06	1.84208e+06	2.01595e+06	2.29982e+06	2.22799e+06	1.95222e+06	1.93967e+06	2.51442e+06	2.63553e+06	2.09475e+06	2528734	2684818	MOUSE
Q80U95	Ubiquitin-protein ligase E3C (EC 2.3.2.26) (HECT-type ubiquitin transferase E3C)	Ube3c	5	471459	442504	375879	402829	469830	278762	292178	309617	508508	481833	560755	527324	455369	297778	506362	575291	316091	581848	600137	MOUSE
Q8R5K4	Nucleolar protein 6 (Nucleolar RNA-associated protein) (Nrap)	Nol6	7	151988	137506	186933	171247	156153	128957	148077	209805	193499	184920	262665	196527	222639	216489	215441	265355	182174	200815	214363	MOUSE
D3Z0M9	RNA helicase (EC 3.6.4.13)	Ddx23	9	396475	385745	500762	513355	328988	299954	365404	415254	251933	406040	488602	469093	450554	340736	483574	486612	444344	511599	625951	MOUSE
Q6NZD2	Sorting nexin-1	Snx1	8	256132	248991	307118	402990	463325	468364	341184	267284	266345	281329	351794	342087	311188	280470	411504	371897	298141	390095	427029	MOUSE
P14869	60S acidic ribosomal protein P0 (60S ribosomal protein L10E)	Rplp0	10	3.07028e+06	2.85645e+06	3.55339e+06	4563666	4.07359e+06	3.3408e+06	3.39106e+06	3500071	3.40864e+06	3696764	4436299	3898148	3.48184e+06	3.24063e+06	4.23616e+06	4.07131e+06	3.26913e+06	4.23568e+06	4.51664e+06	MOUSE
Q8BJS4	SUN domain-containing protein 2 (Protein unc-84 homolog B) (Sad1/unc-84 protein-like 2)	Sun2	9	249675	258074	307341	368761	207581	96372.9	209541	182682	320172	323639	314300	167011	176672	102316	112019	188541	197842	291283	247691	MOUSE
Q8R1Q8	Cytoplasmic dynein 1 light intermediate chain 1 (Dynein light chain A) (DLC-A) (Dynein light intermediate chain 1, cytosolic)	Dync1li1	7	229181	203564	283264	354293	300187	257065	272508	229427	259481	270044	332624	281968	262972	251595	333539	273804	236530	300993	307273	MOUSE
Q61035	Histidine--tRNA ligase, cytoplasmic (EC 6.1.1.21) (Histidyl-tRNA synthetase) (HisRS)	Hars1	5	359787	277940	398751	509713	436226	449018	282923	362796	370834	407504	356188	395429	410699	391069	329790	411645	259797	467006	351231	MOUSE
Q9JIX8	Apoptotic chromatin condensation inducer in the nucleus (Acinus)	Acin1	8	96659.2	121588	147373	179645	193950	178384	160279	125363	167036	156196	152515	213777	200304	199002	264976	264553	213910	230113	229224	MOUSE
Q9JHW2	Omega-amidase NIT2 (EC 3.5.1.3) (Nitrilase homolog 2)	Nit2	9	299850	250753	342521	360502	309868	292104	235035	313767	246300	275084	332216	378505	303420	280152	395296	329712	277769	350597	367302	MOUSE
Q569Z6	Thyroid hormone receptor-associated protein 3 (Thyroid hormone receptor-associated protein complex 150 kDa component) (Trap150)	Thrap3	9	254525	270383	308109	291938	358135	408444	362582	241451	274316	263314	304964	357516	379468	308030	440371	429616	414573	458959	456470	MOUSE
A2AL50	Alkylglycerone-phosphate synthase (Alkyl-DHAP synthase) (EC 2.5.1.26)	Agps	7	115811	114622	152729	152936	162323	138892	147365	119289	109514	114427	123736	211484	211352	189259	229028	204071	124991	168211	177089	MOUSE
P06795	ATP-dependent translocase ABCB1 (ATP-binding cassette sub-family B member 1B) (Multidrug resistance protein 1B) (EC 7.6.2.2) (P-glycoprotein 1) (Phospholipid transporter ABCB1) (EC 7.6.2.1) (CD antigen CD243)	Abcb1b	1	2455.47	14480.9	19925.6	24557.9	10501.1	14424.5	20384	16808.2	15307.1	7954.23	18468.4	2896.63	3825.32	6846.64	15529.8	36527.2	33054	45038.1	25170.5	MOUSE
Q60710	Deoxynucleoside triphosphate triphosphohydrolase SAMHD1 (dNTPase) (EC 3.1.5.-) (Interferon-gamma-inducible protein Mg11) (SAM domain and HD domain-containing protein 1) (mSAMHD1)	Samhd1	8	317398	281140	333865	410415	314214	280282	443477	330549	237224	378720	359429	390670	348637	327950	451835	307627	335812	402060	386732	MOUSE
P12970	60S ribosomal protein L7a (Surfeit locus protein 3)	Rpl7a	13	2.49784e+06	2507658	3.22574e+06	2.55945e+06	2.52591e+06	2.41436e+06	2.14481e+06	2.527e+06	2536015	2.44477e+06	2.58071e+06	2837751	2.41459e+06	2.00036e+06	2.81026e+06	2.28212e+06	2.21947e+06	2.96457e+06	2.73579e+06	MOUSE
P10649	Glutathione S-transferase Mu 1 (EC 2.5.1.18) (GST 1-1) (GST class-mu 1) (Glutathione S-transferase GT8.7) (pmGT10)	Gstm1	10	1.45866e+06	1.0718e+06	1.5633e+06	1.72519e+06	2.65248e+06	2.32384e+06	2.08556e+06	1.41769e+06	1292757	1.62747e+06	1.7809e+06	1.87563e+06	1.64982e+06	1.50243e+06	2.0486e+06	1.57276e+06	1.48385e+06	2.06027e+06	2.02864e+06	MOUSE
O35887	Calumenin (Crocalbin)	Calu	2	118017	101591	133521	135697	125372	166679	127663	105726	113000	128421	157220	115802	110468	110905	114927	128386	98048	97218.1	103007	MOUSE
E9PXX7	Thioredoxin domain-containing protein 5	Txndc5	8	1.2238e+06	1.02551e+06	1.36486e+06	1.67427e+06	1.97587e+06	1.63613e+06	1.50384e+06	1.31087e+06	1.10168e+06	1.3357e+06	1539946	2.11406e+06	1.7196e+06	1.8798e+06	2.32335e+06	1627156	1.20437e+06	1.43522e+06	1.50144e+06	MOUSE
Q8C129	Leucyl-cystinyl aminopeptidase (Cystinyl aminopeptidase) (EC 3.4.11.3) (Oxytocinase) (OTase)	Lnpep	9	486988	443028	566234	737861	505385	555113	467596	468547	467723	602648	728029	450492	491444	535798	621212	535071	403035	506871	578030	MOUSE
Q8BWZ3	N-alpha-acetyltransferase 25, NatB auxiliary subunit (Mitochondrial distribution and morphology protein 20) (N-terminal acetyltransferase B complex subunit MDM20) (NatB complex subunit MDM20) (N-terminal acetyltransferase B complex subunit NAA25)	Naa25	9	240166	309152	336485	442990	195957	192844	219453	265080	302775	315396	420313	261305	305653	273028	323711	325134	257987	388981	430250	MOUSE
Q52KR3	Protein prune homolog 2 (BNIP2 motif-containing molecule at the C-terminal region 1)	Prune2	4	122526	34113.5	62286	70994.3	88604.3	54172.3	65162.5	23782.1	20897.2	43920.1	135274	83943.1	29784.4	88364.5	92228.3	59482.8	95930.7	50183	119958	MOUSE
Q9R190	Metastasis-associated protein MTA2 (Metastasis-associated 1-like 1)	Mta2	3	74373.2	76557.9	101120	118170	99397	107647	113926	89217.8	98848.1	110128	119727	100970	110878	83075.7	115835	136560	117182	124436	142091	MOUSE
Q99LE6	ATP-binding cassette sub-family F member 2	Abcf2	11	704183	789566	845786	1.04237e+06	468601	536011	501348	670681	677943	791672	833326	560891	652122	508607	700471	629452	704891	913436	892191	MOUSE
Q99K48	Non-POU domain-containing octamer-binding protein (NonO protein)	Nono	11	1.73767e+06	1.43932e+06	1.97524e+06	2.28221e+06	2.18849e+06	1.95908e+06	2125827	1.7244e+06	1.82692e+06	2.05469e+06	2378251	2.33383e+06	2.04417e+06	2.26549e+06	2.90533e+06	3028021	2.63971e+06	2.70891e+06	2.97927e+06	MOUSE
Q64133	Amine oxidase [flavin-containing] A (EC 1.4.3.4) (Monoamine oxidase type A) (MAO-A)	Maoa	6	1.14667e+06	930214	1.32104e+06	1.24829e+06	1.51174e+06	1.28647e+06	1.15067e+06	1.16266e+06	1.0254e+06	1.38339e+06	1.45307e+06	1.14742e+06	1.3023e+06	1.17962e+06	1.05032e+06	1.0581e+06	1.0043e+06	495716	522238	MOUSE
Q80Y81	Zinc phosphodiesterase ELAC protein 2 (EC 3.1.26.11) (ElaC homolog protein 2) (Ribonuclease Z 2) (RNase Z 2) (tRNA 3 endonuclease 2) (tRNase Z 2)	Elac2	7	149939	187666	155686	181137	164967	151099	136347	121180	245439	120937	259534	135922	112588	308973	176973	187949	152947	274955	207466	MOUSE
Q9QZD9	Eukaryotic translation initiation factor 3 subunit I (eIF3i) (Eukaryotic translation initiation factor 3 subunit 2) (TGF-beta receptor-interacting protein 1) (TRIP-1) (eIF-3-beta) (eIF3 p36)	Eif3i	13	683660	625947	755154	927318	791154	837992	811007	672700	719119	721354	824267	781028	763316	691391	927945	848261	783120	993081	990529	MOUSE
O88844	Isocitrate dehydrogenase [NADP] cytoplasmic (IDH) (EC 1.1.1.42) (Cytosolic NADP-isocitrate dehydrogenase) (IDP) (NADP(+)-specific ICDH) (Oxalosuccinate decarboxylase)	Idh1	9	342267	287092	392646	516809	908083	780697	727780	405607	364646	459953	465824	542037	479339	443030	558123	381540	356662	359128	412709	MOUSE
P26040	Ezrin (Cytovillin) (Villin-2) (p81)	Ezr	11	453902	459336	568802	715510	622707	516752	588218	494377	479745	535204	582322	343269	359843	273220	368671	592625	487941	711821	653200	MOUSE
Q62470	Integrin alpha-3 (CD49 antigen-like family member C) (Galactoprotein B3) (GAPB3) (VLA-3 subunit alpha) (CD antigen CD49c) [Cleaved into: Integrin alpha-3 heavy chain;Integrin alpha-3 light chain]	Itga3	11	1.00298e+06	933701	1.19454e+06	1.4242e+06	1.52703e+06	1238394	1.33207e+06	1.07339e+06	995025	1.17141e+06	1.38057e+06	1.17117e+06	955461	1.05915e+06	1.27998e+06	1.07031e+06	862445	944452	1.0148e+06	MOUSE
P53995	Anaphase-promoting complex subunit 1 (APC1) (Cyclosome subunit 1) (Mitotic checkpoint regulator) (Testis-specific gene 24 protein)	Anapc1	4	27243	15459.7	34973.6	50781.9	59714	20079.7	50854.6	31382.6	26217.5	29308.9	32412.1	74150.5	37877.7	45346.9	49009.2	61677.9	54874.9	61668.5	38398	MOUSE
Q62465	Synaptic vesicle membrane protein VAT-1 homolog (EC 1.-.-.-)	Vat1	13	2.38063e+06	2062179	2.69783e+06	3.30481e+06	5684723	4.81319e+06	4.87873e+06	1.96747e+06	2097295	1.98436e+06	2.85239e+06	2128772	2333655	2201418	3050276	2629080	2.32173e+06	2973198	3.2273e+06	MOUSE
Q922R8	Protein disulfide-isomerase A6 (EC 5.3.4.1) (Thioredoxin domain-containing protein 7)	Pdia6	14	2.69834e+06	2.43752e+06	3.15473e+06	4.07243e+06	3.96146e+06	3.26782e+06	3.06326e+06	2.73428e+06	2.51853e+06	2.79167e+06	3.34773e+06	3.35983e+06	2.76341e+06	2.85861e+06	3.67381e+06	4658084	3.32912e+06	3.83089e+06	4.04268e+06	MOUSE
Q9Z2I0	Mitochondrial proton/calcium exchanger protein (Leucine zipper-EF-hand-containing transmembrane protein 1)	Letm1	5	117101	120573	157759	193193	110145	51685.1	600355	179250	128684	144162	760852	202818	94972.7	178562	130382	634423	72159	661856	137988	MOUSE
Q3UEB3	Poly(U)-binding-splicing factor PUF60 (60 kDa poly(U)-binding-splicing factor)	Puf60	9	738950	711192	869138	1.14458e+06	1.22333e+06	1.01247e+06	979500	854168	702558	878270	1083520	1.16291e+06	995585	995225	1.23719e+06	1.63348e+06	1183888	1.41889e+06	1.55606e+06	MOUSE
P27659	60S ribosomal protein L3 (J1 protein)	Rpl3	10	1.6711e+06	1.58641e+06	1.95975e+06	2003127	1.81546e+06	1.5846e+06	1.64537e+06	1.79285e+06	1754987	1817971	1.97331e+06	1.89948e+06	1.72009e+06	1535442	1.91282e+06	1.88802e+06	1610325	2.00168e+06	1.97734e+06	MOUSE
A0A0R4J0W6	Leucine-rich repeat-containing protein 40	Lrrc40	5	217095	144314	243741	271530	252084	172262	181158	195348	242899	271385	352732	283700	210594	225580	284717	283655	83816.3	267800	292471	MOUSE
A0A0R4J1E2	Elongation factor 1-delta	Eef1d	2	490941	541474	600737	652351	686094	729947	643971	622891	665367	659633	667417	714354	734363	599042	862633	713378	731163	858076	897389	MOUSE
A0A0R4J107	Acyl-peptide hydrolase (EC 3.4.19.1) (Acylamino-acid-releasing enzyme) (Acylaminoacyl-peptidase) (Fragment)	Apeh	7	269115	225976	293335	346820	359878	332406	336228	284182	244715	246200	341438	309520	330724	296678	388939	346865	316246	426022	466059	MOUSE
Q9R0X4	Acyl-coenzyme A thioesterase 9, mitochondrial (Acyl-CoA thioesterase 9) (EC 3.1.2.-) (Acyl coenzyme A thioester hydrolase 2) (MTE-2) (Acyl-CoA thioester hydrolase 9) (Mitochondrial 48 kDa acyl-CoA thioester hydrolase 1) (Mt-ACT48.1) (Protein U8) (p48)	Acot9	11	507967	616197	752501	1.02742e+06	1.0192e+06	901262	843212	699350	711385	781349	1.02702e+06	918446	789750	871854	1192607	973391	754987	878948	918789	MOUSE
A0A286YDV7	Nucleolar and coiled-body phosphoprotein 1 (Fragment)	Nolc1	1	7822.1	17752.2	29540.9	33176.2	25875.1	7471.22	8034.38	26345.6	24377.8	28655.8	33482.4	36619.1	35282	35690.7	41646.5	40657.1	44227.7	36711.3	38027.7	MOUSE
P70699	Lysosomal alpha-glucosidase (EC 3.2.1.20) (Acid maltase)	Gaa	11	860719	606281	1.0348e+06	1.0738e+06	1.53283e+06	1.05303e+06	1.22664e+06	839781	701168	935892	983085	1.31768e+06	1.11138e+06	1.14704e+06	1481921	1.72278e+06	1.48932e+06	1.67202e+06	1.65438e+06	MOUSE
Q91WK2	Eukaryotic translation initiation factor 3 subunit H (eIF3h) (Eukaryotic translation initiation factor 3 subunit 3) (eIF-3-gamma) (eIF3 p40 subunit)	Eif3h	10	609832	578520	668068	822620	722258	657454	662769	661325	638451	667201	730097	676302	668319	579980	777703	767013	663722	877293	691744	MOUSE
Q3U821	WD repeat-containing protein 75 (U3 small nucleolar RNA-associated protein 17 homolog)	Wdr75	5	200016	183043	131989	177246	169193	148459	75920.9	148597	163153	184376	217879	166975	131428	157539	190503	205933	133934	171095	150338	MOUSE
Q3U741	RNA helicase (EC 3.6.4.13)	Ddx17	13	945826	903520	1.02393e+06	1209176	1.24097e+06	1.17921e+06	1.11229e+06	1.0138e+06	955731	1.1795e+06	1.29926e+06	1.04068e+06	1.2289e+06	1.00624e+06	1.46511e+06	1.23844e+06	1.01777e+06	1.19586e+06	1.18792e+06	MOUSE
Q6DFZ1	Golgi-specific brefeldin A-resistance factor 1	Gbf1	9	262145	180053	185291	351551	331904	299383	248385	187195	169650	189448	249906	245949	290131	294754	312939	312831	284271	320122	232289	MOUSE
Q8QZT1	Acetyl-CoA acetyltransferase, mitochondrial (EC 2.3.1.9) (Acetoacetyl-CoA thiolase)	Acat1	10	935851	736922	1.0463e+06	1.16849e+06	1.35643e+06	1.14516e+06	1.0967e+06	924933	856324	1.01256e+06	1.11912e+06	1.75138e+06	1.36003e+06	1430723	1.80449e+06	1.66023e+06	1.27098e+06	1.29922e+06	1437811	MOUSE
Q3UYV9	Nuclear cap-binding protein subunit 1 (80 kDa nuclear cap-binding protein) (CBP80) (NCBP 80 kDa subunit)	Ncbp1	10	221832	208770	250682	304685	231646	187882	192742	245981	213742	176634	275373	275480	237569	240285	272102	268313	210430	244128	282769	MOUSE
O35129	Prohibitin-2 (B-cell receptor-associated protein BAP37) (Repressor of estrogen receptor activity)	Phb2	14	3.12772e+06	2649561	3.37913e+06	4.15133e+06	4681305	3866392	4.23657e+06	3696826	3669982	4398820	5011799	4947974	4729505	4419891	5.69978e+06	5715450	4881969	5210939	5.16738e+06	MOUSE
P25444	40S ribosomal protein S2 (40S ribosomal protein S4) (Protein LLRep3)	Rps2	12	3.03055e+06	3.01648e+06	3.71447e+06	2724677	2.75273e+06	2529891	2.65982e+06	3110341	3.38247e+06	3.59663e+06	3.96815e+06	2969672	2.51865e+06	2331718	3.08935e+06	2.31626e+06	2.20362e+06	3123172	3249340	MOUSE
Q3TPJ8	Cytoplasmic dynein 1 intermediate chain 2	Dync1i2	9	222681	288414	243583	284362	285805	200462	253423	196474	194278	229495	248608	255824	269028	209474	257402	255260	227744	275026	275873	MOUSE
O08553	Dihydropyrimidinase-related protein 2 (DRP-2) (Unc-33-like phosphoprotein 2) (ULIP-2)	Dpysl2	13	798537	804473	999128	1189598	1.39159e+06	1147681	1.23383e+06	816616	877087	964131	1.03216e+06	883219	873672	795241	1.10103e+06	818147	748870	976876	1.04174e+06	MOUSE
P16332	Methylmalonyl-CoA mutase, mitochondrial (MCM) (EC 5.4.99.2) (Methylmalonyl-CoA isomerase)	Mmut	7	157618	168864	190508	237669	205637	148662	147069	181253	149323	281245	231969	168237	156881	190949	206557	172401	139071	191262	235634	MOUSE
P50446	Keratin, type II cytoskeletal 6A (Cytokeratin-6A) (CK-6A) (Keratin-6-alpha) (mK6-alpha) (Keratin-6A) (K6A)	Krt6a	1	30812.7	29930.8	40115	20167.1	13662.7	27094.4	42301.9	14127.2	22524.1	14899.7	27268.4	20402.3	19369	15177.9	31442.2	14286.5	8075.19	14652.9	36142.5	MOUSE
P35441	Thrombospondin-1 (Glycoprotein G)	Thbs1	8	353255	306704	464946	510640	316391	290693	170536	201966	192228	249721	326178	463288	445651	453177	657588	201353	174799	177585	267350	MOUSE
A0A0R4J0Q5	Lamin-B2	Lmnb2	4	93457	76987.2	119447	120548	133117	137975	110424	97747	86331.5	98869.1	55280	161648	124377	115463	148499	142993	115199	107839	150579	MOUSE
Q99LC5	Electron transfer flavoprotein subunit alpha, mitochondrial (Alpha-ETF)	Etfa	12	999274	749499	1.08239e+06	1.25486e+06	1.62496e+06	1.17213e+06	1.31066e+06	997639	824691	992230	1.18202e+06	1.49591e+06	1.15039e+06	1.25533e+06	1.55265e+06	1.70975e+06	1.26446e+06	1273564	1450972	MOUSE
Q6ZPJ3	(E3-independent) E2 ubiquitin-conjugating enzyme UBE2O (EC 2.3.2.24) (E2/E3 hybrid ubiquitin-protein ligase UBE2O) (Ubiquitin carrier protein O) (Ubiquitin-conjugating enzyme E2 O) (Ubiquitin-conjugating enzyme E2 of 230 kDa) (Ubiquitin-conjugating enzyme E2-230K) (Ubiquitin-protein ligase O)	Ube2o	6	95963	106534	111779	148494	132967	130760	110434	75041.8	97816.6	112646	104691	107863	108082	94572.1	132452	165455	126699	166714	185206	MOUSE
Q99MR8	Methylcrotonoyl-CoA carboxylase subunit alpha, mitochondrial (MCCase subunit alpha) (EC 6.4.1.4) (3-methylcrotonyl-CoA carboxylase 1) (3-methylcrotonyl-CoA carboxylase biotin-containing subunit) (3-methylcrotonyl-CoA:carbon dioxide ligase subunit alpha)	Mccc1	8	236015	184158	231091	251366	284835	197779	232938	270685	252864	266877	339966	355383	274054	273445	387081	299833	218939	260769	239067	MOUSE
Q07113	Cation-independent mannose-6-phosphate receptor (CI Man-6-P receptor) (CI-MPR) (M6PR) (300 kDa mannose 6-phosphate receptor) (MPR 300) (Insulin-like growth factor 2 receptor) (Insulin-like growth factor II receptor) (IGF-II receptor) (M6P/IGF2 receptor) (M6P/IGF2R) (CD antigen CD222)	Igf2r	4	111732	134366	164656	193723	135475	144376	115440	96271.3	111340	137650	149972	141318	135240	153944	182882	147881	96814.6	119836	141095	MOUSE
P63101	14-3-3 protein zeta/delta (Protein kinase C inhibitor protein 1) (KCIP-1) (SEZ-2)	Ywhaz	7	3.13012e+06	2.85687e+06	3.71429e+06	4.28898e+06	4210608	4103102	3740578	3303062	3.14296e+06	3.53553e+06	3670290	3.2817e+06	2936637	2.61527e+06	3722843	3.56161e+06	3285758	4.15678e+06	4.27777e+06	MOUSE
Q9Z1Z2	Serine-threonine kinase receptor-associated protein (UNR-interacting protein)	Strap	9	672255	455069	816980	999774	804266	904713	811305	812817	903482	858286	968601	789467	869450	744580	1.01271e+06	814506	766590	1.03211e+06	1.05014e+06	MOUSE
E9QPX1	Collagen alpha-1(XVIII) chain	Col18a1	7	77639.1	104268	63730	112357	146904	148786	131774	129331	143803	97387.8	142557	67146.5	91555.7	89299.6	74967.3	496591	367133	388661	405929	MOUSE
Q02248	Catenin beta-1 (Beta-catenin)	Ctnnb1	5	225807	143415	212099	240617	317011	262808	278036	170957	122151	164975	215791	200849	229649	231286	296128	176632	170865	233129	184130	MOUSE
Q9CSH3	Exosome complex exonuclease RRP44 (EC 3.1.13.-) (EC 3.1.26.-) (Protein DIS3 homolog) (Ribosomal RNA-processing protein 44)	Dis3	7	217247	218681	311142	327218	203310	212071	233547	301248	317809	214282	443237	204799	242069	129820	190911	215225	226710	282810	276744	MOUSE
Q8BVY0	Ribosomal L1 domain-containing protein 1	Rsl1d1	11	560002	545581	650990	627132	292267	239665	239327	553022	608412	665115	657803	430117	305576	269135	399532	424511	357132	405081	344387	MOUSE
Q6DFW4	Nucleolar protein 58 (MSSP) (Nucleolar protein 5) (SIK-similar protein)	Nop58	13	825446	743543	981432	1.19537e+06	583061	514302	671208	893124	907565	1.17685e+06	1.31936e+06	620717	645199	558077	750501	746956	745188	808024	734067	MOUSE
Q9CXF4	TBC1 domain family member 15 (GTPase-activating protein RAB7) (GAP for RAB7) (Rab7-GAP)	Tbc1d15	10	351939	351467	457394	590476	422900	345758	365702	363684	397770	414539	501119	399431	388282	362264	480692	447252	399989	499078	513948	MOUSE
Q8BHB4	WD repeat-containing protein 3	Wdr3	3	92691.7	83702.4	112603	111846	83807.2	87490.2	81410.4	123446	126342	138126	164154	78026.6	107985	76846	80546.9	109571	122767	140862	137423	MOUSE
P27641	X-ray repair cross-complementing protein 5 (EC 3.6.4.-) (ATP-dependent DNA helicase 2 subunit 2) (ATP-dependent DNA helicase II 80 kDa subunit) (CTC box-binding factor 85 kDa subunit) (CTC85) (CTCBF) (DNA repair protein XRCC5) (Ku autoantigen protein p86 homolog) (Ku80) (Nuclear factor IV)	Xrcc5	10	335031	245418	374222	378849	480276	482625	440771	409198	376914	423920	452965	364739	407957	362436	507177	601772	492154	615993	619825	MOUSE
Q8VEM8	Phosphate carrier protein, mitochondrial (Phosphate transport protein) (PTP) (Solute carrier family 25 member 3)	Slc25a3	9	2.79423e+06	2.89267e+06	3.65818e+06	4497771	2.11903e+06	1504618	1.51337e+06	3.07326e+06	3.18975e+06	3.96608e+06	4.37217e+06	3.55871e+06	2.04704e+06	3.20849e+06	2.65334e+06	2.04135e+06	1677659	2.27826e+06	2.35932e+06	MOUSE
A0A1B0GR11	Transaldolase (EC 2.2.1.2)	Taldo1	8	454438	437830	556639	635723	599549	655813	602056	519742	539004	509025	610702	498856	485293	427269	601806	546570	529303	652931	677003	MOUSE
P45376	Aldo-keto reductase family 1 member B1 (EC 1.1.1.300) (EC 1.1.1.372) (EC 1.1.1.54) (Aldehyde reductase) (Aldo-keto reductase family 1 member B3) (Aldose reductase) (AR) (EC 1.1.1.21)	Akr1b1	9	1.02865e+06	755502	921518	968600	1.11837e+06	1.43449e+06	1.16382e+06	918960	1.02678e+06	1.04914e+06	1.50969e+06	1.14247e+06	965527	960351	1.49213e+06	1.15202e+06	1.2066e+06	1.44074e+06	1.47479e+06	MOUSE
Q99ME9	Nucleolar GTP-binding protein 1 (Chronic renal failure gene protein) (GTP-binding protein NGB)	Gtpbp4	5	186676	155018	164393	219294	145488	129710	148715	167028	199550	198038	249442	150839	132457	134111	143885	182682	144646	174722	146830	MOUSE
P97351	40S ribosomal protein S3a (Protein TU-11)	Rps3a	11	5865923	6191799	7294834	7.77591e+06	5.42392e+06	5724560	5.33176e+06	5832169	6.772e+06	7.02778e+06	7.40641e+06	5.61089e+06	5.3285e+06	4.56028e+06	5.81164e+06	4.55591e+06	4.77441e+06	6.20726e+06	6357080	MOUSE
H3BL37	Treacle protein	Tcof1	10	384313	572535	398104	684001	801919	894040	704344	498708	695251	542502	680229	345703	413007	307351	588072	599954	516844	543953	771552	MOUSE
E9Q804	Ankyrin repeat domain-containing protein 17	Ankrd17	2	27219.1	18240.6	24556.2	47237.1	29100.1	27698.4	30362.3	29999.4	27281.5	18287	40515	39804.8	28139.9	31292.2	37101.2	54151.1	39547.6	54292.8	55603	MOUSE
Q3U367	4-trimethylaminobutyraldehyde dehydrogenase	Aldh9a1	11	522811	453666	597977	660102	513745	468715	407597	535052	541353	581609	648705	588260	575938	491984	680235	532812	450557	555856	628820	MOUSE
Q6NXL1	Sec24-related gene family, member D (S. cerevisiae)	Sec24d	2	26662.7	22990.6	4709.94	22424.9	25904.9	26048	23877.2	20615	25401.1	17612	4941.36	26552.1	25190.9	18763.2	14274.9	30397.4	24566.8	16696	21328.2	MOUSE
Q6ZQH8	Nucleoporin NUP188	Nup188	3	44969.2	36345.2	46271.9	66893.6	43766.4	24830.6	47059.8	34548.6	52558.7	55866.4	77998	57285.7	71076.8	49898.2	78391.2	75496.8	48781	56008	85861.7	MOUSE
A2AE27	AMP deaminase (EC 3.5.4.6)	Ampd2	6	260394	263217	286940	326466	315647	350245	209807	249083	247374	344100	385258	227654	230447	242015	393966	291560	317945	373556	384495	MOUSE
P32921	Tryptophan--tRNA ligase, cytoplasmic (EC 6.1.1.2) (Tryptophanyl-tRNA synthetase) (TrpRS) [Cleaved into: T1-TrpRS;T2-TrpRS]	Wars1	10	654105	590912	696916	917784	816399	713829	698753	743589	673718	775376	880897	630208	539381	419640	657387	499337	491812	577625	650017	MOUSE
A0A0J9YUL3	Septin	Septin11	5	228089	227405	290439	315037	259981	257873	255694	229165	230608	236561	288963	265264	252399	214016	290566	283693	272833	323836	340794	MOUSE
P35700	Peroxiredoxin-1 (EC 1.11.1.24) (Macrophage 23 kDa stress protein) (Osteoblast-specific factor 3) (OSF-3) (Thioredoxin peroxidase 2) (Thioredoxin-dependent peroxide reductase 2) (Thioredoxin-dependent peroxiredoxin 1)	Prdx1	7	3.4465e+06	3.41279e+06	4153524	5.08263e+06	5517826	5.40979e+06	4.45044e+06	3.74671e+06	3.60235e+06	3.9807e+06	4.87045e+06	3596646	3.14509e+06	3018056	4.06056e+06	4.46674e+06	3.76018e+06	4.96905e+06	5.49749e+06	MOUSE
A2AJ72	Far upstream element (FUSE)-binding protein 3	Fubp3	8	366727	317458	489893	554562	593362	573084	471930	405161	387749	483077	520124	637398	568278	518251	764503	608280	463474	574789	573913	MOUSE
P97855	Ras GTPase-activating protein-binding protein 1 (G3BP-1) (EC 3.6.4.12) (EC 3.6.4.13) (ATP-dependent DNA helicase VIII) (GAP SH3 domain-binding protein 1) (HDH-VIII)	G3bp1	10	1.07323e+06	1.03502e+06	1.22863e+06	1.57379e+06	1.11199e+06	1.06192e+06	1.10005e+06	1.08631e+06	1.1564e+06	1.21362e+06	1318698	1.26744e+06	1.11818e+06	997152	1.36588e+06	1118467	1.10213e+06	1.41288e+06	1.33524e+06	MOUSE
G3X928	SEC23-interacting protein	Sec23ip	6	189407	174817	228653	213847	269290	230758	231710	196912	194462	206728	240490	234354	238263	201615	271039	250423	216786	288930	282880	MOUSE
Q8VHM5	Heterogeneous nuclear ribonucleoprotein R	Hnrnpr	6	440875	400747	501168	626565	476230	460056	511688	450366	434077	512587	603656	462959	493654	472355	553180	625345	533057	619037	595042	MOUSE
Q6NV83	U2 snRNP-associated SURP motif-containing protein (140 kDa Ser/Arg-rich domain protein) (U2-associated protein SR140)	U2surp	9	165893	159398	170371	229174	179943	205620	211078	143203	168529	140281	225883	197063	201850	199275	252589	281469	238149	269733	275219	MOUSE
O08759	Ubiquitin-protein ligase E3A (EC 2.3.2.26) (HECT-type ubiquitin transferase E3A) (Oncogenic protein-associated protein E6-AP)	Ube3a	8	145616	231885	183592	252971	225512	304550	160269	672226	187451	199565	269115	254489	259751	214601	244061	263470	165105	246752	297526	MOUSE
Q3UE92	Xaa-Pro aminopeptidase 1	Xpnpep1	7	451698	338026	472238	602397	594418	645642	547860	450623	460450	488418	572743	537481	470127	451359	591644	482007	489722	601896	628975	MOUSE
P54823	Probable ATP-dependent RNA helicase DDX6 (EC 3.6.4.13) (ATP-dependent RNA helicase p54) (DEAD box protein 6) (Oncogene RCK homolog)	Ddx6	11	482640	491648	562505	648798	596173	631395	543473	500022	511043	546468	596171	622801	610075	537955	724765	653128	562308	766143	815298	MOUSE
O35841	Apoptosis inhibitor 5 (API-5) (AAC-11)	Api5	7	329835	316066	389795	494009	467820	364454	409341	460363	447282	375250	474599	503952	370680	376746	467509	519689	461611	561221	482351	MOUSE
P08249	Malate dehydrogenase, mitochondrial (EC 1.1.1.37)	Mdh2	11	5.32667e+06	4.52744e+06	6198020	7.44661e+06	6706043	6.08307e+06	5620561	5.42509e+06	5.12942e+06	5.60725e+06	6619421	8932942	7.30196e+06	7.60579e+06	9967930	10684535	7.92589e+06	8.10385e+06	9012995	MOUSE
Q9CQM9	Glutaredoxin-3 (PKC-interacting cousin of thioredoxin) (PICOT) (PKC-theta-interacting protein) (PKCq-interacting protein) (Thioredoxin-like protein 2)	Glrx3	10	696564	654332	814458	999739	930385	866689	768746	742742	746703	782670	983606	891135	766858	739166	975733	900077	767956	971668	1.09817e+06	MOUSE
E9QL12	Dysferlin	Dysf	2	38647.2	43798	48536.3	47727.6	48589.6	39894.3	52128	31690	38929.6	62002.7	64220	51989.7	45860.6	50784.8	46422.1	49070.5	21363.2	46427.9	29601.9	MOUSE
Q9D1A2	Cytosolic non-specific dipeptidase (EC 3.4.13.18) (CNDP dipeptidase 2) (Glutamate carboxypeptidase-like protein 1)	Cndp2	11	1.09692e+06	466437	1.18272e+06	1398217	716234	855128	828015	641531	1.04074e+06	1.24452e+06	1.43866e+06	565205	1.04337e+06	419951	1.24781e+06	1.52865e+06	1.21649e+06	1.29774e+06	1.47569e+06	MOUSE
Q8BWT1	3-ketoacyl-CoA thiolase, mitochondrial (EC 2.3.1.16) (Acetyl-CoA acetyltransferase) (EC 2.3.1.9) (Acetyl-CoA acyltransferase) (Acyl-CoA hydrolase, mitochondrial) (EC 3.1.2.-) (EC 3.1.2.1) (EC 3.1.2.2) (Beta-ketothiolase) (Mitochondrial 3-oxoacyl-CoA thiolase)	Acaa2	10	426810	323741	462072	532091	659640	635307	561733	359660	248728	398775	467552	527940	421337	436135	546988	654481	492172	487528	582170	MOUSE
O70310	Glycylpeptide N-tetradecanoyltransferase 1 (EC 2.3.1.97) (Myristoyl-CoA:protein N-myristoyltransferase 1) (NMT 1) (Type I N-myristoyltransferase) (Peptide N-myristoyltransferase 1)	Nmt1	8	499636	486906	578430	701829	636311	593044	611458	510068	557198	593523	678977	508858	511255	448798	636805	575895	567836	752642	784241	MOUSE
Q9CZ13	Cytochrome b-c1 complex subunit 1, mitochondrial (Complex III subunit 1) (Core protein I) (Ubiquinol-cytochrome-c reductase complex core protein 1)	Uqcrc1	9	628757	551672	738279	830471	867946	952772	644764	683298	613354	711616	782354	1.0093e+06	765076	784077	1.00151e+06	1.01266e+06	801506	738324	888037	MOUSE
Q60932	Voltage-dependent anion-selective channel protein 1 (VDAC-1) (mVDAC1) (Outer mitochondrial membrane protein porin 1) (Plasmalemmal porin) (Voltage-dependent anion-selective channel protein 5) (VDAC-5) (mVDAC5)	Vdac1	11	1.68412e+06	1.55347e+06	1.85086e+06	2.06483e+06	1.56615e+06	1.6186e+06	1.2662e+06	1.6507e+06	1.62952e+06	1.89919e+06	2.06437e+06	1.87741e+06	1.17613e+06	1.51337e+06	1.57567e+06	1.56628e+06	1.3729e+06	1.33369e+06	1.22321e+06	MOUSE
Q9Z0N1	Eukaryotic translation initiation factor 2 subunit 3, X-linked (EC 3.6.5.3) (Eukaryotic translation initiation factor 2 subunit gamma, X-linked) (eIF-2-gamma X)	Eif2s3x	3	169007	169601	207854	225394	132475	154080	134518	167063	192999	192854	209924	175123	202181	149107	235694	156220	177297	217604	213046	MOUSE
Q6PAV2	Probable E3 ubiquitin-protein ligase HERC4 (EC 2.3.2.26) (HECT domain and RCC1-like domain-containing protein 4) (HECT-type E3 ubiquitin transferase HERC4)	Herc4	6	288460	217677	322692	359663	309953	217303	294980	247100	245242	140223	107959	343207	279388	366194	396649	381565	238662	295566	367329	MOUSE
E9QN63	Arf-GAP with SH3 domain, ANK repeat and PH domain-containing protein 1	Asap1	4	73259.6	38417.3	112943	60755.6	113963	93654.4	66223.1	47394.9	47206.8	61494.3	66149.4	100707	49550	78326.5	95062.5	83558.8	66671.7	59584.9	79013.4	MOUSE
Q99JB2	Stomatin-like protein 2, mitochondrial (SLP-2) (mslp2)	Stoml2	10	372752	288251	395916	435144	422479	315301	364111	373893	330989	354289	433141	431247	409437	397503	433845	353146	250237	188991	305198	MOUSE
Q91YR5	eEF1A lysine and N-terminal methyltransferase (eEF1A-KNMT) (Methyltransferase-like protein 13) [Includes: eEF1A lysine methyltransferase (EC 2.1.1.-);eEF1A N-terminal methyltransferase (EC 2.1.1.-)]	EEF1AKNMT	6	200428	182924	245899	331808	143719	145857	188561	212971	207382	175221	306240	250191	225136	238964	286639	230506	190977	261078	285588	MOUSE
Q6A028	Switch-associated protein 70 (SWAP-70)	Swap70	7	386128	362447	448242	475709	448875	502300	395192	386849	403987	424399	492710	381706	415809	313933	456158	192794	248510	261341	268817	MOUSE
Q9D4G5	Processing of precursor 1, ribonuclease P/MRP family, (S. cerevisiae)	Pop1	4	81471.9	63330.9	83415.5	112960	56227.5	79157	62775.6	56581.4	98766.8	79735.8	85590.2	59718	53621.8	73648.9	67888.4	86264.4	77341.7	80045.1	99754.4	MOUSE
Q8BKX1	Brain-specific angiogenesis inhibitor 1-associated protein 2 (BAI-associated protein 2) (BAI1-associated protein 2) (Insulin receptor substrate protein of 53 kDa) (IRSp53) (Insulin receptor substrate p53) (Insulin receptor tyrosine kinase 53 kDa substrate)	Baiap2	8	201025	186424	211444	232012	533680	508412	477148	170801	187718	202021	202137	421602	267365	272494	513287	383389	446195	505485	567728	MOUSE
P16460	Argininosuccinate synthase (EC 6.3.4.5) (Citrulline--aspartate ligase)	Ass1	8	387238	332058	439513	473369	431725	445278	362355	237484	274569	326749	329410	370898	348801	277433	434886	590122	602358	740668	730372	MOUSE
P17751	Triosephosphate isomerase (TIM) (EC 5.3.1.1) (Methylglyoxal synthase) (EC 4.2.3.3) (Triose-phosphate isomerase)	Tpi1	11	4400743	3.98722e+06	5.21398e+06	6095178	9448869	9661093	8789347	6.30524e+06	6213760	6.83149e+06	7527480	7004534	6.77819e+06	5.96352e+06	8.36803e+06	6.32485e+06	5.91058e+06	7.78732e+06	7955778	MOUSE
Q9DB77	Cytochrome b-c1 complex subunit 2, mitochondrial (Complex III subunit 2) (Core protein II) (Ubiquinol-cytochrome-c reductase complex core protein 2)	Uqcrc2	14	1.01089e+06	817259	1.01304e+06	1.21036e+06	1323216	1.36185e+06	1.16724e+06	899097	929150	1.03192e+06	1137108	1.31695e+06	1.16466e+06	1.07471e+06	1.49103e+06	1.54833e+06	1.34184e+06	1.36558e+06	1.39657e+06	MOUSE
Q60865	Caprin-1 (Cytoplasmic activation- and proliferation-associated protein 1) (GPI-anchored membrane protein 1) (GPI-anchored protein p137) (GPI-p137) (p137GPI) (Membrane component chromosome 11 surface marker 1) (RNA granule protein 105)	Caprin1	10	689302	700401	858715	1.06174e+06	847618	834526	843073	745266	729554	735570	908161	973992	944212	836321	1.11478e+06	883659	784128	983969	1.09092e+06	MOUSE
Q6NZR5	Superkiller viralicidic activity 2-like (S. cerevisiae)	Skiv2l	6	86700.5	86383.5	208320	138453	119691	107918	103241	78919	98886.7	194050	195270	97234.7	86566.2	88489.3	124055	137104	115458	149562	164351	MOUSE
E9PYG6	RAS p21 protein activator 1	Rasa1	7	199964	155338	212437	277211	216006	170129	225503	189392	150511	142034	226722	142202	145630	91357.4	207424	163191	86811.9	155000	223027	MOUSE
E9QPR5	Serine/threonine-protein phosphatase 4 regulatory subunit 1	Ppp4r1	6	103493	88762.3	83912.8	152453	163809	94334.5	101318	137293	117307	113483	142711	142413	104643	117072	126091	117152	91885.7	159811	148196	MOUSE
O35685	Nuclear migration protein nudC (Nuclear distribution protein C homolog) (Silica-induced gene 92 protein) (SIG-92)	Nudc	8	585103	616646	664726	803518	542249	608814	582605	645517	763382	734503	781238	659852	680707	564767	802754	616366	684112	856039	827546	MOUSE
Q3UF95	BCL2-associated athanogene 6 (HLA-B-associated transcript 3) (Large proline-rich protein BAG6)	Bag6	10	357899	353086	453080	535254	506462	616402	442648	380069	409843	434218	511247	533386	587831	462903	688741	644524	529798	721110	717679	MOUSE
Q9DBC7	cAMP-dependent protein kinase type I-alpha regulatory subunit [Cleaved into: cAMP-dependent protein kinase type I-alpha regulatory subunit, N-terminally processed]	Prkar1a	8	490289	409412	568202	616602	936314	748295	882473	445525	396807	528979	554636	610280	579104	524027	692124	631606	701723	856426	854442	MOUSE
P08752	Guanine nucleotide-binding protein G(i) subunit alpha-2 (Adenylate cyclase-inhibiting G alpha protein)	Gnai2	4	282421	237343	304148	408970	316262	231884	324622	251165	224820	288690	336564	272199	233423	266677	297534	269810	258208	275557	204265	MOUSE
Q8CFI7	DNA-directed RNA polymerase II subunit RPB2 (EC 2.7.7.6) (DNA-directed RNA polymerase II 140 kDa polypeptide) (DNA-directed RNA polymerase II subunit B) (RNA polymerase II subunit 2) (RNA polymerase II subunit B2)	Polr2b	9	162692	164781	206671	231758	161480	184166	197035	193705	204119	255288	268265	177133	170526	202604	213407	278638	285832	263323	283770	MOUSE
D3YUE2	Procollagen C-endopeptidase enhancer 1	Pcolce	12	570432	483972	672036	781758	862818	818303	689512	425139	355142	456414	564909	1.04863e+06	964816	1.02332e+06	1.31002e+06	975230	707480	921873	916804	MOUSE
Q07417	Short-chain specific acyl-CoA dehydrogenase, mitochondrial (SCAD) (EC 1.3.8.1) (Butyryl-CoA dehydrogenase)	Acads	10	692517	578417	797460	928842	871102	672914	687698	641141	598915	771226	776606	1.13509e+06	962771	1047081	1.28881e+06	1.07175e+06	942189	916502	894999	MOUSE
Q3ULD5	Methylcrotonoyl-CoA carboxylase beta chain, mitochondrial (MCCase subunit beta) (EC 6.4.1.4) (3-methylcrotonyl-CoA carboxylase 2) (3-methylcrotonyl-CoA carboxylase non-biotin-containing subunit) (3-methylcrotonyl-CoA:carbon dioxide ligase subunit beta)	Mccc2	8	281717	250154	351502	318524	327989	297184	333022	203574	262496	326253	303831	371503	710581	317435	422756	316165	522737	248529	313787	MOUSE
A0A0N4SUH4	Pumilio homolog 3	Pum3	7	240941	199351	276118	281598	156383	113973	148738	291431	267670	330476	335081	244550	163924	187030	219947	231990	217040	255852	247343	MOUSE
Q99L45	Eukaryotic translation initiation factor 2 subunit 2 (Eukaryotic translation initiation factor 2 subunit beta) (eIF-2-beta)	Eif2s2	8	478664	444321	536213	682087	509803	489440	457172	477186	542666	583501	665549	487234	437471	395631	521818	397042	341521	516103	506068	MOUSE
Q99N15	17beta-hydroxysteroid dehydrogenase type 10/short chain L-3-hydroxyacyl-CoA dehydrogenase (3-hydroxyacyl-CoA dehydrogenase type-2) (Hydroxysteroid (17-beta) dehydrogenase 10)	Hsd17b10	9	1.12184e+06	879581	1.23266e+06	1524178	1.65098e+06	1156912	1306805	1.21601e+06	1.04917e+06	1372206	1.58139e+06	1.75541e+06	1.41493e+06	1.46679e+06	1.89615e+06	2.0203e+06	1.45076e+06	1542045	1.75887e+06	MOUSE
P14206	40S ribosomal protein SA (37 kDa laminin receptor precursor) (37LRP) (37 kDa oncofetal antigen) (37/67 kDa laminin receptor) (LRP/LR) (67 kDa laminin receptor) (67LR) (Laminin receptor 1) (LamR) (Laminin-binding protein precursor p40) (LBP/p40) (OFA/iLRP)	Rpsa	11	2984711	2.94661e+06	3.58659e+06	4385133	4040396	3678431	3.56134e+06	3.53484e+06	3.40308e+06	3638610	4198478	4.0175e+06	3641115	3.41714e+06	4752553	3.66417e+06	3.37044e+06	4479862	4773611	MOUSE
Q9CY58	Plasminogen activator inhibitor 1 RNA-binding protein (PAI1 RNA-binding protein 1) (PAI-RBP1) (SERPINE1 mRNA-binding protein 1)	Serbp1	4	393825	350845	393035	420470	248824	272189	316631	408121	412286	410957	467725	275032	307834	220149	271491	266510	285784	341258	301787	MOUSE
Q8VIJ6	Splicing factor, proline- and glutamine-rich (DNA-binding p52/p100 complex, 100 kDa subunit) (Polypyrimidine tract-binding protein-associated-splicing factor) (PSF) (PTB-associated-splicing factor)	Sfpq	8	1.35385e+06	1.24924e+06	1.54964e+06	1.8426e+06	1.90256e+06	1.74936e+06	1.87822e+06	1.43829e+06	1.39549e+06	1.62456e+06	1.78231e+06	1858490	1.84387e+06	1.7791e+06	2.22854e+06	2.54074e+06	2.17182e+06	2.27966e+06	2.32409e+06	MOUSE
P35550	rRNA 2'-O-methyltransferase fibrillarin (EC 2.1.1.-) (Histone-glutamine methyltransferase) (Nucleolar protein 1) (U6 snRNA 2'-O-methyltransferase fibrillarin)	Fbl	8	1.08379e+06	967987	1.06649e+06	1.39012e+06	1.17474e+06	1.0863e+06	1.01236e+06	1.19522e+06	1.16392e+06	1.33969e+06	1.55166e+06	1255964	1.26272e+06	1.18131e+06	1609100	1.46321e+06	1.23815e+06	1.33283e+06	1.45827e+06	MOUSE
Q9Z247	Peptidyl-prolyl cis-trans isomerase FKBP9 (PPIase FKBP9) (EC 5.2.1.8) (63 kDa FK506-binding protein) (63 kDa FKBP) (FKBP-63) (FK506-binding protein 9) (FKBP-9) (FKBP65RS) (Rotamase)	Fkbp9	6	204631	230558	248688	303367	339130	381136	354071	281126	294882	331251	412428	385910	395980	380096	486976	342376	314134	321718	325708	MOUSE
F7AC58	Piezo-type mechanosensitive ion channel component	Piezo1	1	1913.38	1434.38	843.379	2208.38	937.333	2643.9	1869.73	1704.51	2126.64	2249.5	2113.85	1319.81	1877.85	712.916	1438.26	280.957	2104.47	1906.64	195.117	MOUSE
Q99KQ4	Nicotinamide phosphoribosyltransferase (NAmPRTase) (Nampt) (EC 2.4.2.12) (Pre-B-cell colony-enhancing factor 1 homolog) (PBEF) (Visfatin)	Nampt	8	238521	235746	282776	306427	410154	390155	353789	262132	299254	340638	359998	323541	283484	229290	386440	249245	250554	288939	318360	MOUSE
E9Q852	Afadin	Afdn	3	17151.1	13295.6	15116.6	28533.2	18980.8	29534.9	29568.2	27114.2	17117.6	27530.5	29509.7	13996.3	18258.5	12793.1	8379.9	18342.6	4025.38	23204.7	25043.7	MOUSE
O35218	Cleavage and polyadenylation specificity factor subunit 2 (Cleavage and polyadenylation specificity factor 100 kDa subunit) (CPSF 100 kDa subunit)	Cpsf2	6	80417.5	72374.7	111980	103201	122363	109336	124663	95777	100515	85719.1	109234	140180	122047	109641	145284	147108	126432	139437	156662	MOUSE
G3UZ26	Serine hydroxymethyltransferase (EC 2.1.2.1) (Fragment)	Shmt1	9	334953	309591	335721	503672	476459	668562	436745	409084	402240	458172	506875	456768	448601	365771	537593	434969	446993	542518	566134	MOUSE
E9QAT0	Synaptic functional regulator FMR1	Fmr1	6	165149	156725	196161	226438	222866	185999	186488	178571	204307	224045	204948	157895	129795	117711	227425	213110	140502	192284	191140	MOUSE
Q9Z0W3	Nuclear pore complex protein Nup160 (160 kDa nucleoporin) (Gene trap locus 1-13 protein) (GTL-13) (Nucleoporin Nup160)	Nup160	7	141081	131811	176596	134975	220907	104327	156139	143426	126165	148359	183685	256942	223224	215775	244811	249599	206523	235987	212914	MOUSE
Q8C4J7	Transducin beta-like protein 3	Tbl3	7	221599	231729	255390	311298	297682	192201	209832	282104	306111	302799	408556	355770	325082	336455	371905	448758	303847	367019	338583	MOUSE
O88532	Zinc finger RNA-binding protein	Zfr	5	66115.5	54663.4	81118.1	86696.3	48334.5	56951.5	58436.6	64561	70642.2	80110.2	73019.8	57801.4	56371.6	59659.1	70239.4	78683.8	72977.8	86407.8	81952.5	MOUSE
Q5SWZ5	Myosin phosphatase Rho-interacting protein	Mprip	5	67594	142534	172349	236628	198612	79787.5	68035.3	175288	151867	180364	90962	175876	140061	154273	197006	174928	127990	150315	183779	MOUSE
Q6P8N8	ATP-dependent Clp protease ATP-binding subunit clpX-like, mitochondrial (Caseinolytic peptidase X (E.coli))	Clpx	5	162789	147230	197016	249102	148606	139538	133110	188502	155558	206980	245786	210058	76795.3	193435	214168	163741	174362	183539	190106	MOUSE
P22892	AP-1 complex subunit gamma-1 (Adaptor protein complex AP-1 subunit gamma-1) (Adaptor-related protein complex 1 subunit gamma-1) (Clathrin assembly protein complex 1 gamma-1 large chain) (Gamma-adaptin) (Gamma1-adaptin) (Golgi adaptor HA1/AP1 adaptin subunit gamma-1)	Ap1g1	7	198152	139209	200645	300716	227755	183112	240345	177025	152993	179563	180002	217416	159474	126631	229578	324368	241754	336062	301253	MOUSE
P61202	COP9 signalosome complex subunit 2 (SGN2) (Signalosome subunit 2) (Alien homolog) (JAB1-containing signalosome subunit 2) (Thyroid receptor-interacting protein 15) (TR-interacting protein 15) (TRIP-15)	Cops2	6	356418	341451	454589	606293	605213	555749	496632	407512	399436	453015	554999	578375	490064	461894	638181	612607	511164	656239	759525	MOUSE
Q8C2Q7	Heterogeneous nuclear ribonucleoprotein H	Hnrnph1	6	601444	553215	658091	769427	878180	836609	676898	624150	584586	614696	660912	847035	716894	661520	791770	838274	666426	647892	705725	MOUSE
D3YUM1	NADH dehydrogenase [ubiquinone] flavoprotein 1, mitochondrial (EC 7.1.1.2)	Ndufv1	5	205360	185760	224292	293897	349974	291308	305069	164883	193934	218139	242226	257360	217790	210076	295089	391446	318036	337506	360264	MOUSE
Q8CE80	Calpain inhibitor (Calpastatin)	Cast	6	114423	110114	152621	120554	206639	179311	194090	121236	104641	136401	149586	100929	118242	109426	124674	167075	113850	128420	129780	MOUSE
P0DTC2	Spike glycoprotein (S glycoprotein) (E2) (Peplomer protein) [Cleaved into: Spike protein S1;Spike protein S2;Spike protein S2']	S	9	119494	96620.6	66946.6	146978	97569.9	117618	112778	86714.7	76443.3	123394	159593	118933	73741.6	79152.1	171822	1.62858e+06	1.3865e+06	1.67866e+06	1.40618e+06	SARS2
P14576	Signal recognition particle 54 kDa protein (SRP54) (EC 3.6.5.-)	Srp54	9	302912	239014	295562	321184	298022	283413	301184	230957	285674	338404	359055	249369	325569	211234	278018	265361	284082	308185	394480	MOUSE
P10852	4F2 cell-surface antigen heavy chain (4F2hc) (Solute carrier family 3 member 2) (CD antigen CD98)	Slc3a2	8	1.08261e+06	1.0368e+06	1151285	1.46424e+06	1.15512e+06	1.10761e+06	936175	1.34249e+06	1345370	1.40072e+06	1.76186e+06	1.17756e+06	1.00746e+06	978320	1.29242e+06	1.10453e+06	820980	1078239	1.03469e+06	MOUSE
P47962	60S ribosomal protein L5	Rpl5	11	1.42884e+06	1.5308e+06	1.91621e+06	2.18698e+06	1.67056e+06	1.71834e+06	1.64271e+06	1.58929e+06	1.79548e+06	1.8853e+06	2.00153e+06	1.83201e+06	1.48877e+06	1.54171e+06	1.81347e+06	1.70442e+06	1.5605e+06	1.86501e+06	1.98458e+06	MOUSE
A0A2I3BRL8	Predicted gene 7324	Gm7324	5	781687	713750	891788	1.10547e+06	787479	952943	790627	767674	744964	810219	986964	1.01482e+06	857909	861841	1.04478e+06	1.16397e+06	835807	1.00413e+06	1.0743e+06	MOUSE
Q9ESX5	H/ACA ribonucleoprotein complex subunit DKC1 (EC 5.4.99.-) (Dyskerin) (Nopp140-associated protein of 57 kDa) (Nucleolar protein NAP57) (Nucleolar protein family A member 4) (snoRNP protein DKC1)	Dkc1	7	510935	429175	538853	616056	428677	361019	431717	508006	471098	587418	650373	426958	409612	379011	472225	511224	457406	519553	502491	MOUSE
D0VYV6	Band 4.1-like protein 3 (Erythrocyte protein band 4.1-like 3 isoform B)	Epb41l3	1	8635.4	1334.29	1252.05	4658.63	7005.47	5453.41	7519.95	4734.92	5180.75	8418.95	4620.83	1808.47	6813.71	7142.56	7673.39	1513.55	6513.78	5720.05	3401.05	MOUSE
Q8K4L2	Archvillin (Supervillin)	Svil	5	61493.6	53374.3	72586.9	76315.4	52634.9	61817.5	82222.5	48294.6	77796.1	34942.2	71328	37355.6	71818.5	59882.6	90694	75868.9	40427.7	74486	75722.5	MOUSE
G3UXZ5	Proteasome activator complex subunit 1 (Fragment)	Psme1	6	248706	192073	255689	327580	446789	327157	390115	330398	289539	328491	427483	396351	332268	303945	397702	480030	405263	476975	493836	MOUSE
Q8CI11	Guanine nucleotide-binding protein-like 3 (Nucleolar GTP-binding protein 3) (Nucleostemin)	Gnl3	3	40943	41719.4	51746.8	44690.9	51244.2	42737.7	42137.7	34183.6	42960.1	52829.9	55888.4	43223.9	39274.2	49098.4	55936.5	65338.8	54285.1	54030.5	43493.1	MOUSE
Q8BJY1	26S proteasome non-ATPase regulatory subunit 5 (26S protease subunit S5 basic) (26S proteasome subunit S5B)	Psmd5	11	561885	579340	712470	857941	855064	935082	666503	557568	595555	590050	886853	933991	779208	747986	1.10308e+06	772305	697470	933912	975170	MOUSE
O08795	Glucosidase 2 subunit beta (80K-H protein) (Glucosidase II subunit beta) (Protein kinase C substrate 60.1 kDa protein heavy chain) (PKCSH)	Prkcsh	9	870149	713091	1.07926e+06	1.34872e+06	1.24272e+06	1.53668e+06	1.24961e+06	933516	852575	1.19862e+06	1.33092e+06	1.18114e+06	1.21222e+06	1.03157e+06	1.4817e+06	1.41201e+06	1.21291e+06	1.29986e+06	1.36823e+06	MOUSE
Q8C605	ATP-dependent 6-phosphofructokinase (ATP-PFK) (Phosphofructokinase) (EC 2.7.1.11) (Phosphohexokinase)	Pfkp	8	198642	198520	266465	353747	245879	209251	193399	113859	228402	277495	349371	188942	204012	228043	293163	153632	103031	291301	268710	MOUSE
Q7TSC1	Protein PRRC2A (HLA-B-associated transcript 2) (Proline-rich and coiled-coil-containing protein 2A)	Prrc2a	5	94504.8	60065.9	104302	133310	115177	89247.8	104267	117758	109970	142256	127659	105133	84438.1	120077	115856	135054	74723.6	151223	111678	MOUSE
Q9CZ44	NSFL1 cofactor p47 (p97 cofactor p47)	Nsfl1c	10	603154	517563	717137	854926	860273	850783	684182	679330	659573	717479	803589	909075	824069	675956	1.03931e+06	697248	753533	900995	958989	MOUSE
P60335	Poly(rC)-binding protein 1 (Alpha-CP1) (Heterogeneous nuclear ribonucleoprotein E1) (hnRNP E1)	Pcbp1	10	1.84786e+06	1.61471e+06	2.20189e+06	2.70171e+06	3.59024e+06	3.34689e+06	2.98124e+06	2343228	2.3744e+06	2.28663e+06	2.79417e+06	3.27599e+06	2851362	2758610	3.92096e+06	3.44956e+06	2.88564e+06	3.65454e+06	3.84799e+06	MOUSE
Q0KL02	Triple functional domain protein (EC 2.7.11.1)	Trio	2	22692.7	37059.9	45536.3	38571.8	45734.8	83043	37292.7	75097.6	84099.7	30944.9	48986.6	109234	24082.1	83645.3	58324.2	110169	21860.6	33685.9	11874.1	MOUSE
Q9DBD5	Proline-, glutamic acid- and leucine-rich protein 1 (Modulator of non-genomic activity of estrogen receptor)	Pelp1	9	295054	244628	350720	454846	463557	332839	378914	349930	292479	334274	406972	453374	418342	447191	601095	613560	466554	481910	559296	MOUSE
Q9R1P4	Proteasome subunit alpha type-1 (Macropain subunit C2) (Multicatalytic endopeptidase complex subunit C2) (Proteasome component C2) (Proteasome nu chain)	Psma1	8	605516	605560	692892	785374	682628	784048	662816	629577	638748	676755	768929	705348	551175	600357	888091	815578	733749	911752	874678	MOUSE
D3Z7B5	Protein CIP2A	Cip2a	2	26740.3	49034.9	35806.4	35855.6	19473.3	35060.9	34709.3	29343.1	49059	28761.9	43688.1	48214	36046.5	41843	67929.9	40755.3	45266.1	62329.1	51554.5	MOUSE
A2AWA9	Rab GTPase-activating protein 1 (GAP and centrosome-associated protein) (Rab6 GTPase-activating protein GAPCenA)	Rabgap1	4	39208.4	42813.9	45277.4	58098.3	24875.4	49564.4	51357.1	67604.6	34528.3	51718.8	51555.1	54309.5	53840	42728.5	72546.4	38196.2	52028.2	51071.1	52925.4	MOUSE
Q9JK81	MYG1 exonuclease (EC 3.1.-.-) (Protein Gamm1)	Myg1	12	681657	627724	797888	1.02604e+06	1.18037e+06	1.12814e+06	934789	847350	840255	915074	1.08364e+06	947700	832898	742101	1.07292e+06	1.05383e+06	906056	1.15795e+06	1.24663e+06	MOUSE
Q62446	Peptidyl-prolyl cis-trans isomerase FKBP3 (PPIase FKBP3) (EC 5.2.1.8) (25 kDa FK506-binding protein) (25 kDa FKBP) (FKBP-25) (FK506-binding protein 3) (FKBP-3) (Immunophilin FKBP25) (Rapamycin-selective 25 kDa immunophilin) (Rotamase)	Fkbp3	6	477403	439765	446078	498894	411941	557700	365878	408088	370546	466991	568743	406244	413417	350168	429295	392645	359453	373068	448239	MOUSE
Q9JII6	Aldo-keto reductase family 1 member A1 (EC 1.1.1.2) (EC 1.1.1.33) (EC 1.1.1.372) (EC 1.1.1.54) (Alcohol dehydrogenase [NADP(+)]) (Aldehyde reductase) (Glucuronate reductase) (EC 1.1.1.19) (Glucuronolactone reductase) (EC 1.1.1.20)	Akr1a1	6	756217	623883	792989	1.05014e+06	1107779	919678	908782	782051	694248	818762	1.01634e+06	856972	719158	694849	932892	722149	582692	821428	874015	MOUSE
Q99KP6	Pre-mRNA-processing factor 19 (EC 2.3.2.27) (Nuclear matrix protein 200) (PRP19/PSO4 homolog) (RING-type E3 ubiquitin transferase PRP19) (Senescence evasion factor)	Prpf19	7	688598	669218	781634	969765	1.02634e+06	998441	801809	730261	714008	682706	897845	1.0039e+06	943152	810223	1203633	1.44277e+06	1.11683e+06	1.24409e+06	1.28763e+06	MOUSE
Q6PGC1	ATP-dependent RNA helicase DHX29 (EC 3.6.4.13) (DEAH box protein 29)	Dhx29	4	165040	160080	219316	293191	477233	493028	376048	228637	210317	253710	341092	273396	236065	241544	349684	228659	200870	235407	291203	MOUSE
O88325	Alpha-N-acetylglucosaminidase (Alpha-N-acetylglucosaminidase (Sanfilippo disease IIIB)) (N-acetyl-glucosaminidase)	Naglu	4	95972.3	88891	126569	91653.9	163393	151493	85567.6	55683.5	62995	124803	136946	70081.7	63740.5	73677.4	145322	176980	147232	122627	183692	MOUSE
Q8VCN5	Cystathionine gamma-lyase (EC 4.4.1.1) (Cysteine-protein sulfhydrase) (Gamma-cystathionase)	Cth	9	589730	634251	629351	1.00877e+06	472623	418719	397240	1.11589e+06	1.02817e+06	1.19154e+06	1.36747e+06	396266	337286	290369	442255	219223	197132	258860	272928	MOUSE
Q6PHQ9	Polyadenylate-binding protein (PABP)	Pabpc4	8	491763	425374	557519	734276	664051	698583	602395	522064	538513	559813	712126	585404	606872	509382	670792	511423	507261	584513	633667	MOUSE
Q8BU03	Periodic tryptophan protein 2 homolog	Pwp2	4	100522	100055	130625	142729	109168	120173	105257	137664	128635	161117	179324	130532	144414	139082	198544	178727	148034	172231	172616	MOUSE
B9EKJ3	Protein MON2 homolog	Mon2	4	127556	70813	151418	181089	122778	215950	199283	163290	83011.2	140348	126297	185817	135180	147933	159839	194691	118968	131424	212039	MOUSE
Q8BFQ1	Prosaposin	Psap	11	2.11265e+06	1.48404e+06	2.51912e+06	2.57859e+06	2600694	2.04782e+06	2.55914e+06	2.44587e+06	1970058	2.56043e+06	2.83459e+06	2.27498e+06	1.82599e+06	1.95322e+06	2.41115e+06	2.90504e+06	2.25833e+06	2.24634e+06	2.45158e+06	MOUSE
A0A0U1RPL0	Ataxin-2-like protein	Atxn2l	1	21290.3	18478.2	18914.3	23978.6	20736.2	22724.1	16292.3	18260.3	15996.9	19375.5	19453.1	22633.7	17860.9	16088.8	20896.2	25771.1	18590.5	24962.7	20477.8	MOUSE
E9QKE4	Rab3 GTPase-activating protein non-catalytic subunit	Rab3gap2	2	50517.5	47001.5	55973.1	34015.5	62324.3	46031.1	36428.8	49864.3	32157.7	35184.7	17079.5	69654.3	62395.1	35888.1	69578.2	44967	39327.9	60542.3	62896.4	MOUSE
A2AKG8	Focadhesin	Focad	3	24390.9	35873.5	22983.7	192451	249466	151723	42079.5	38027.6	142506	42481.6	56540.2	51131.9	56271.8	171778	104035	43519.2	28770.7	44725.6	41341.6	MOUSE
P45952	Medium-chain specific acyl-CoA dehydrogenase, mitochondrial (MCAD) (EC 1.3.8.7)	Acadm	11	778275	574205	829780	930914	1.29476e+06	1091799	967433	813475	718426	888941	1.00851e+06	1.19069e+06	980061	973288	1.23559e+06	1.0547e+06	888902	920814	1.0305e+06	MOUSE
Q3UKJ7	WD40 repeat-containing protein SMU1 (Smu-1 suppressor of mec-8 and unc-52 protein homolog) [Cleaved into: WD40 repeat-containing protein SMU1, N-terminally processed]	Smu1	5	300665	287744	329986	436311	421948	360208	205612	331284	168607	309939	387487	425110	372329	378656	489300	553140	424840	497999	504860	MOUSE
Q9D4H8	Cullin-2 (CUL-2)	Cul2	4	144836	62699.5	167333	185859	155628	190315	152278	171452	67164.4	75438.8	211072	157252	171813	140641	99565.5	88421.2	188415	229428	255201	MOUSE
Q61937	Nucleophosmin (NPM) (Nucleolar phosphoprotein B23) (Nucleolar protein NO38) (Numatrin)	Npm1	8	6.16651e+06	5.6077e+06	6.89963e+06	7832380	6.84524e+06	5.20206e+06	6.68789e+06	7.46664e+06	6943426	7.5599e+06	8.01277e+06	7888775	7059965	6.86313e+06	8223812	11603166	9151512	9557213	9856045	MOUSE
Q8BRF7	Sec1 family domain-containing protein 1 (Syntaxin-binding protein 1-like 2)	Scfd1	6	202018	176428	215164	289448	323976	263216	287024	212783	144492	203120	254824	302082	239276	240425	291643	316068	214220	265649	296043	MOUSE
I1E4X5	VPS35 endosomal protein-sorting factor-like	Vps35l	6	144353	141475	158274	158229	175298	111412	226071	142211	157391	133553	169345	184644	142087	118902	195981	141123	109023	159342	189161	MOUSE
Q80Y44	Probable ATP-dependent RNA helicase DDX10 (EC 3.6.4.13) (DEAD box protein 10)	Ddx10	2	18366.6	14122.4	30105.9	31197.3	32608.5	11409	29102	34039.2	14402.4	28051.1	44331.6	32481.3	28097.6	28670.9	40628.4	40734.9	31787.8	43276.3	34333.5	MOUSE
Q80XR6	Heterogeneous nuclear ribonucleoprotein A/B (Hnrpab protein)	Hnrnpab	9	2.97546e+06	2.88435e+06	3.70427e+06	4592579	3.90049e+06	3.44692e+06	3.57768e+06	3.27071e+06	3.48142e+06	3.69652e+06	4428579	3.80868e+06	3.6863e+06	3690711	4.45078e+06	5447656	4.46077e+06	4.8956e+06	5.06724e+06	MOUSE
Q9EPU4	Cleavage and polyadenylation specificity factor subunit 1 (Cleavage and polyadenylation specificity factor 160 kDa subunit) (CPSF 160 kDa subunit)	Cpsf1	4	67275.2	55735.1	83541.4	108071	126485	115696	90668.3	72075.8	62942.6	82227.6	133936	101135	104909	98746.1	137014	140257	114543	132855	136957	MOUSE
P24270	Catalase (EC 1.11.1.6)	Cat	7	222202	156874	175903	249479	247724	195327	223694	196671	186606	202933	200743	314494	306760	290140	406331	327437	272865	222175	257796	MOUSE
Q8K268	ATP-binding cassette sub-family F member 3	Abcf3	6	198130	142610	168766	265139	241342	174011	174229	184606	207262	228426	259642	200718	159947	224557	224008	282958	245955	343671	315061	MOUSE
E9QQ10	A-kinase anchor protein 9	Akap9	2	2851.69	38404.5	21626.7	11959.7	10947.1	8949.65	24475.6	12639.7	24363.1	10244.8	29945	12831.5	47459.5	15656.2	32452.3	30392.1	40631	18605.3	28683.8	MOUSE
E9PWI6	GRIP and coiled-coil domain-containing protein 2	Gcc2	1	8972.03	7511.3	7866.99	9768.44	7765.54	9747.97	8916.04	8337.74	6354.43	8540.93	2202.76	9065.63	9076.9	7491.34	12381.7	8958.94	9991.6	9776.26	9784.45	MOUSE
A0A3B2WCN9	Tight junction protein ZO-2	Tjp2	5	60552.8	72498.1	78776.2	104851	114454	120259	104698	99959.3	99835.9	103552	110124	65404.8	74342.1	60541.1	52507.6	113424	87769.8	140614	135440	MOUSE
P54728	UV excision repair protein RAD23 homolog B (HR23B) (mHR23B) (XP-C repair-complementing complex 58 kDa protein) (p58)	Rad23b	8	1.04025e+06	937997	1.1836e+06	1.30902e+06	1.4769e+06	1.67052e+06	1.54607e+06	974376	989899	1.0108e+06	1.11594e+06	1.17225e+06	1027907	915017	1.14419e+06	850010	770986	951673	934230	MOUSE
E9PV22	Leucine-rich repeat-containing protein 47	Lrrc47	4	124173	114576	155437	196140	141661	140410	163674	100384	132943	166867	187676	114419	130444	112495	152129	139221	130157	165798	174831	MOUSE
A0A0R4J170	Transcription activator BRG1	Smarca4	5	101509	115439	114203	165755	87382.6	58346.5	78930.9	103444	88574.3	111386	102578	63075.7	92918.3	84306.2	95962.4	83986.7	53706.3	92417.5	112643	MOUSE
Q5SF07	Insulin-like growth factor 2 mRNA-binding protein 2 (IGF2 mRNA-binding protein 2) (IMP-2) (IGF-II mRNA-binding protein 2) (VICKZ family member 2)	Igf2bp2	10	514090	411504	536536	668742	578211	483964	509888	448556	423890	503903	566542	476461	395550	398890	439932	491418	405160	497491	558582	MOUSE
P61161	Actin-related protein 2 (Actin-like protein 2)	Actr2	9	1.08415e+06	1.04395e+06	1307363	1.61142e+06	1.60838e+06	1526783	1.37142e+06	1.27207e+06	1.29627e+06	1.41562e+06	1.72619e+06	1.5787e+06	1.39575e+06	1.33079e+06	1.73353e+06	1.53051e+06	1.28764e+06	1.5383e+06	1.7307e+06	MOUSE
Q925I1	ATPase family AAA domain-containing protein 3 (AAA-ATPase TOB3)	Atad3	6	278920	222953	331348	364120	290516	230859	215299	254875	257087	311784	372072	337684	243108	288841	329138	309517	243356	273137	295184	MOUSE
Q5MJ56	Myosin VIIa isoform 2 (Unconventional myosin-VIIa)	Myo7a	2	37230.6	34210.8	17607.1	39637.9	43500.7	46099.3	43186.9	29083.1	38744.9	48809.8	34589.7	27288.4	39705.8	18270.5	39804	54069.5	49968.2	63245.6	70859.6	MOUSE
Q8BX02	KN motif and ankyrin repeat domain-containing protein 2 (Ankyrin repeat domain-containing protein 25)	Kank2	5	106821	162075	212228	266575	324607	252644	307310	172368	81432.6	193161	221200	233663	201715	208890	264782	184294	135950	218454	205712	MOUSE
Q921H8	3-ketoacyl-CoA thiolase A, peroxisomal (EC 2.3.1.16) (Acetyl-CoA C-myristoyltransferase) (EC 2.3.1.155) (Acetyl-CoA acyltransferase A) (EC 2.3.1.9) (Beta-ketothiolase A) (Peroxisomal 3-oxoacyl-CoA thiolase A)	Acaa1a	9	318417	256371	353579	394002	771875	644138	597293	251680	217315	275594	308652	461209	395728	376540	469261	730609	557256	593894	622221	MOUSE
Q99K41	EMILIN-1 (Elastin microfibril interface-located protein 1) (Elastin microfibril interfacer 1)	Emilin1	7	142587	130797	227347	210496	123888	86823.8	67203.2	135768	126919	143614	168203	284877	236981	256779	369286	170425	99892.9	170563	187142	MOUSE
Q8K2V6	Importin-11 (Imp11) (Ran-binding protein 11) (RanBP11)	Ipo11	7	149144	188553	90634.3	237145	153055	116856	143735	189376	151633	184199	213238	215407	203280	174825	240079	149378	156693	205220	217178	MOUSE
Q80X50	Ubiquitin-associated protein 2-like	Ubap2l	11	524862	527794	661097	852211	718843	538758	684072	593592	603773	704680	789479	555163	620806	524961	727241	689535	615449	789193	831969	MOUSE
Q6PAR5	GTPase-activating protein and VPS9 domain-containing protein 1 (GAPex-5) (Rab5-activating protein 6)	Gapvd1	2	54133.1	40324.9	56276.5	66702.8	74312.8	64997.7	53097.9	69987.7	55124.7	68523.1	70736	71794.9	63406	56087.5	98860	66051	50632.1	71736.7	84962.4	MOUSE
Q921X9	Protein disulfide-isomerase A5 (EC 5.3.4.1) (Protein disulfide isomerase-related protein)	Pdia5	6	214232	245741	228025	243814	252746	275188	150002	166355	166163	160730	229852	198627	214017	225879	271034	271673	228902	296506	283995	MOUSE
Q99KJ8	Dynactin subunit 2 (50 kDa dynein-associated polypeptide) (Dynactin complex 50 kDa subunit) (DCTN-50) (Growth cone membrane protein 23-48K) (GMP23-48K) (p50 dynamitin)	Dctn2	6	380259	339411	427726	621655	621282	569685	479005	406616	380745	424864	525512	514242	443467	412541	590960	550357	392619	546733	607009	MOUSE
Q91VU7	Pseudouridylate synthase 7 homolog (EC 5.4.99.-)	Pus7	5	156515	146044	166558	237733	184408	130219	131393	142799	172242	173186	199804	171665	186648	192136	234356	164705	175793	250964	291132	MOUSE
P0DOV2	Interferon-activable protein 204 (Ifi-204) (Interferon-inducible protein p204)	Ifi204	4	97624.6	92305.6	121310	153990	91667.8	113816	149305	126369	125814	137728	167535	71136	108561	97932.1	141146	110332	103175	136568	141066	MOUSE
Q9CS42	Ribose-phosphate pyrophosphokinase 2 (EC 2.7.6.1) (Phosphoribosyl pyrophosphate synthase II) (PRS-II)	Prps2	1	18599.5	16563.4	21227.2	22123.6	22887.4	24176.5	21487.6	19234.9	18505.7	17416.2	24748.7	20479.3	22740	27130.6	32850.4	11652.8	18897.5	24425.7	25439.6	MOUSE
H3BKH6	S-formylglutathione hydrolase (EC 3.1.2.12)	Esd	9	1.39698e+06	1.18476e+06	1.46568e+06	1.87688e+06	1926992	1.6579e+06	1.48394e+06	1.45692e+06	1381281	1.58631e+06	1.73251e+06	1.29951e+06	1.07293e+06	1.05657e+06	1.34999e+06	1.32802e+06	1.24214e+06	1.70738e+06	1.81012e+06	MOUSE
A0A1L1STE6	Isocitrate dehydrogenase [NAD] subunit, mitochondrial	Idh3a	11	1.69245e+06	1.55564e+06	2.11663e+06	2454959	2281347	2.08438e+06	1.98772e+06	1.84018e+06	1.86794e+06	2.2005e+06	2.40004e+06	2.61661e+06	2.26052e+06	2407029	3.13589e+06	2.51654e+06	2.10712e+06	2.29128e+06	2404921	MOUSE
Q9WTP7	GTP:AMP phosphotransferase AK3, mitochondrial (EC 2.7.4.10) (Adenylate kinase 3) (AK 3) (Adenylate kinase 3 alpha-like 1)	Ak3	6	349911	253643	258309	409471	393260	521811	513354	379834	429695	269264	349142	391675	300702	303982	630544	456446	516791	430419	524877	MOUSE
Q9QXK3	Coatomer subunit gamma-2 (Gamma-2-coat protein) (Gamma-2-COP)	Copg2	6	176512	154978	195533	213535	145851	187661	211947	156366	134449	181751	222858	168976	219542	161079	179552	84800.3	103359	215190	165910	MOUSE
Q9R0E1	Multifunctional procollagen lysine hydroxylase and glycosyltransferase LH3 [Includes: Procollagen-lysine,2-oxoglutarate 5-dioxygenase 3 (EC 1.14.11.4) (Lysyl hydroxylase 3) (LH3);Procollagen glycosyltransferase (EC 2.4.1.50) (EC 2.4.1.66) (Galactosylhydroxylysine-glucosyltransferase) (Procollagen galactosyltransferase) (Procollagen glucosyltransferase)]	Plod3	10	429593	474483	579716	751095	660099	581369	568035	430479	458582	485275	573809	857741	753292	742816	1.02043e+06	691006	568618	661136	657741	MOUSE
Q6P549	Phosphatidylinositol 3,4,5-trisphosphate 5-phosphatase 2 (EC 3.1.3.86) (AblSH3-binding protein) (Inositol polyphosphate phosphatase-like protein 1) (INPPL-1) (SH2 domain-containing inositol 5'-phosphatase 2) (SH2 domain-containing inositol phosphatase 2) (SHIP-2)	Inppl1	1	21975	17999	11445.3	24848.5	11807.9	13925.1	12976.9	15084.2	9836.55	31738	13129.5	10548	10160.2	14355.3	27705.9	6134.2	12904.8	15146.1	37776.6	MOUSE
Q8VHK9	ATP-dependent DNA/RNA helicase DHX36 (EC 3.6.4.13) (DEAD/H box polypeptide 36) (DEAH box protein 36) (MLE-like protein 1) (RNA helicase associated with AU-rich element ARE)	Dhx36	3	46453.6	52632.3	65091.3	81099.3	54476.2	31907.3	49403	54048	70497.1	74123.6	84074.2	51698.6	36431.5	30234.2	54226.4	42720.5	41434.9	63834.8	70083.3	MOUSE
Q3TVK3	Aspartyl aminopeptidase (EC 3.4.11.21)	Dnpep	7	290294	238707	343825	409401	381670	372068	368469	271120	263168	325306	381261	309746	309511	289375	366650	259015	236167	310592	344992	MOUSE
Q3UZG4	Aminoacyl tRNA synthase complex-interacting multifunctional protein 1	Aimp1	12	941368	922988	1.02647e+06	1272628	1.05256e+06	1137285	768336	1.05624e+06	870488	965584	1195543	1.19857e+06	1.05933e+06	956656	1.25426e+06	1.1235e+06	983743	1.21562e+06	1.21446e+06	MOUSE
Q3B7Z2	Oxysterol-binding protein 1	Osbp	4	70205.6	66029	76060.9	83620.9	113549	107638	96873.9	71969.3	62439.8	73056.4	86707.1	61584.1	57809	70446	121642	66460.9	63871.5	107796	101177	MOUSE
O54724	Caveolae-associated protein 1 (Cav-p60) (Cavin-1) (Polymerase I and transcript release factor)	Cavin1	12	853091	828339	912805	1183527	1.74541e+06	2.18662e+06	2.22679e+06	885164	900670	986128	1.28245e+06	821643	1.03245e+06	847166	1.08545e+06	1.02421e+06	1.02374e+06	1.14315e+06	1.02837e+06	MOUSE
Q60972	Histone-binding protein RBBP4 (Chromatin assembly factor 1 subunit C) (CAF-1 subunit C) (Chromatin assembly factor I p48 subunit) (CAF-I 48 kDa subunit) (CAF-I p48) (Nucleosome-remodeling factor subunit RBAP48) (Retinoblastoma-binding protein 4) (RBBP-4) (Retinoblastoma-binding protein p48)	Rbbp4	2	95282.6	102078	133626	127482	182473	191105	140324	115403	115777	122108	149008	186273	132153	156153	190468	235611	193209	186370	225548	MOUSE
Q7TSV4	Phosphoglucomutase-2 (PGM 2) (EC 5.4.2.2) (Glucose phosphomutase 2) (Phosphodeoxyribomutase) (Phosphoglucomutase-1) (Phosphopentomutase) (EC 5.4.2.7)	Pgm2	7	225682	208671	245694	258440	262877	280037	249775	200401	191610	219352	230847	267842	243202	228248	290726	252995	218569	243042	268180	MOUSE
Q8VDP4	Cell cycle and apoptosis regulator protein 2 (Cell division cycle and apoptosis regulator protein 2)	Ccar2	3	50704.9	35509.7	53995.1	61432.8	68522.5	55193.4	53428	57115	49222.1	56998.8	67970	81093.5	69383.6	69170.5	78807.6	103258	80461.4	82646.6	80802.1	MOUSE
D3YWX2	YLP motif-containing protein 1	Ylpm1	3	24661.1	13272.7	53281.9	27065.7	37851.9	49387.5	43956.9	39355.3	93440.5	41658.6	30814.7	41731	51033.1	31010.2	58184.5	84054.8	46990	57164.1	49515.1	MOUSE
P31324	cAMP-dependent protein kinase type II-beta regulatory subunit	Prkar2b	8	222867	224305	308719	396396	277154	253991	305199	304599	272577	329417	390480	305577	303896	278986	365940	283644	261686	335862	316841	MOUSE
Q7M6Y3	Phosphatidylinositol-binding clathrin assembly protein (Clathrin assembly lymphoid myeloid leukemia) (CALM)	Picalm	8	295712	251614	339895	381768	313381	280091	319135	271904	264333	342394	361398	329246	326278	308947	367098	391167	320272	378232	364045	MOUSE
P70372	ELAV-like protein 1 (Elav-like generic protein) (Hu-antigen R) (HuR) (MelG)	Elavl1	9	1031397	992097	1.14922e+06	1368334	1.34561e+06	1.43362e+06	1234764	951456	1.03435e+06	1.09502e+06	1.28884e+06	1.48175e+06	1.46337e+06	1.33941e+06	1.82162e+06	1892663	1.62658e+06	1719576	1.74734e+06	MOUSE
Q9QYJ0	DnaJ homolog subfamily A member 2 (mDj3)	Dnaja2	8	282142	241339	370437	401524	323758	299322	361706	283330	316373	337322	333125	447624	423770	349434	461879	504355	395144	514969	506798	MOUSE
Q920E5	Farnesyl pyrophosphate synthase (FPP synthase) (FPS) (EC 2.5.1.10) ((2E,6E)-farnesyl diphosphate synthase) (Cholesterol-regulated 39 kDa protein) (CR 39) (Dimethylallyltranstransferase) (EC 2.5.1.1) (Farnesyl diphosphate synthase) (Geranyltranstransferase)	Fdps	11	915625	913191	1.08566e+06	1344837	1.11851e+06	983829	969900	1.42453e+06	1.43e+06	1.38068e+06	1.60911e+06	1.17294e+06	1.02168e+06	929025	1.16037e+06	542944	457937	737188	727983	MOUSE
A0A0R4J187	ATP-dependent DNA helicase 2 subunit 1	Xrcc6	4	60347.7	94645.8	81692.3	140208	118886	161322	122830	124843	105543	104541	122507	63457.1	107866	108489	217082	140068	127529	142556	176087	MOUSE
Q9DBY8	Nuclear valosin-containing protein-like (NVLp) (Nuclear VCP-like protein)	Nvl	3	48242.1	33766.6	51238.8	97938.5	20278.4	51435	45791.8	73019.6	37519.5	31798.3	40592.5	59426.1	70615.3	43442.3	84128.2	42640.7	45259	68078.4	74387.7	MOUSE
Q8C3Y4	Kinetochore-associated protein 1	Kntc1	1	16675.6	10863.9	14028.9	20429.3	17718.6	9988.55	2035.99	9676.24	9805.92	13320.4	19235.5	20267.5	14140.7	14157.1	18448.7	19914.1	7387.23	19550.4	18739.4	MOUSE
Q9CXW3	Calcyclin-binding protein (CacyBP) (Siah-interacting protein)	Cacybp	10	823870	1.03445e+06	1.24534e+06	1.58219e+06	1.01828e+06	790813	619276	1.13141e+06	914990	921431	1.02935e+06	1.27736e+06	1.32831e+06	1.22749e+06	1.63713e+06	1.5011e+06	1.2193e+06	1.62164e+06	1.61278e+06	MOUSE
Q9Z2U0	Proteasome subunit alpha type-7 (Proteasome subunit RC6-1)	Psma7	11	1.83952e+06	1.66065e+06	2.08903e+06	2526177	2.46496e+06	2493214	2.03489e+06	1871400	1.84911e+06	1.93416e+06	2.35714e+06	2.64988e+06	2285971	2.06599e+06	2.73307e+06	2.71976e+06	2.26847e+06	2.98038e+06	2.80558e+06	MOUSE
Q3TUQ5	Pinin	Pnn	4	113816	107810	120018	150840	127567	160348	166365	107257	117282	126315	127400	179415	187017	153548	226708	271933	218767	237718	245441	MOUSE
P70195	Proteasome subunit beta type-7 (EC 3.4.25.1) (Macropain chain Z) (Multicatalytic endopeptidase complex chain Z) (Proteasome subunit Z)	Psmb7	7	367542	361587	447543	496900	402239	476510	446583	383182	436064	460986	371741	375128	441772	387716	537401	449055	381682	536179	537076	MOUSE
P83741	Serine/threonine-protein kinase WNK1 (EC 2.7.11.1) (Protein kinase lysine-deficient 1) (Protein kinase with no lysine 1)	Wnk1	3	41147.5	223377	61920.6	83652.2	79120.4	53979	69367.3	68581.5	70224.5	71551.1	88328.9	81849	58744.8	66813.4	115540	61669.1	54378.1	97260.3	93648.5	MOUSE
Q9DAW6	U4/U6 small nuclear ribonucleoprotein Prp4 (U4/U6 snRNP 60 kDa protein) (WD splicing factor Prp4)	Prpf4	7	204391	210643	253992	275464	305758	318857	260588	217873	201893	160866	260692	308357	290481	197474	350022	397257	290987	319971	330916	MOUSE
Q9QUJ7	Long-chain-fatty-acid--CoA ligase 4 (EC 6.2.1.3) (Arachidonate--CoA ligase) (EC 6.2.1.15) (Long-chain acyl-CoA synthetase 4) (LACS 4) (mACS4)	Acsl4	4	56013.2	36648.9	42247.8	49547.7	46928.3	18618.9	38445.2	52229.8	60742.5	48289.9	77119	34676.7	41602.2	45183.2	38872.4	59453.2	42738	43949.2	54244	MOUSE
Q6ZWN5	40S ribosomal protein S9	Rps9	9	3.88147e+06	3.9359e+06	4.83737e+06	5191594	4.00502e+06	3432925	2940757	4.15667e+06	4084828	4.40196e+06	4907053	4157415	3.21148e+06	2.87515e+06	3.86906e+06	3259444	2.72275e+06	3.83005e+06	4.04347e+06	MOUSE
Q6PE01	U5 small nuclear ribonucleoprotein 40 kDa protein (U5 snRNP 40 kDa protein) (WD repeat-containing protein 57)	Snrnp40	5	157193	148435	178448	222359	228265	178798	192464	171704	162816	176870	213014	217015	210279	196118	284205	310781	228947	230324	225067	MOUSE
P52293	Importin subunit alpha-1 (Importin alpha P1) (Karyopherin subunit alpha-2) (Pendulin) (Pore targeting complex 58 kDa subunit) (PTAC58) (RAG cohort protein 1) (SRP1-alpha)	Kpna2	10	354632	392146	444939	654796	403061	254072	361247	388193	416954	356837	419247	377998	388851	320553	455751	1.02441e+06	788433	1.00019e+06	1.01127e+06	MOUSE
Q8BT60	Copine-3 (Copine III)	Cpne3	5	289909	313167	336827	420471	307379	344820	259268	260525	297099	284903	373094	287419	292600	242083	346471	222953	203876	262900	263638	MOUSE
Q8BP92	Reticulocalbin-2 (Taipoxin-associated calcium-binding protein 49) (TCBP-49)	Rcn2	10	525708	429087	526971	529883	573834	423061	484419	501325	399476	485121	543283	590410	469094	484231	570088	549433	429414	460560	475119	MOUSE
P11688	Integrin alpha-5 (CD49 antigen-like family member E) (Fibronectin receptor subunit alpha) (Integrin alpha-F) (VLA-5) (CD antigen CD49e) [Cleaved into: Integrin alpha-5 heavy chain;Integrin alpha-5 light chain]	Itga5	7	203000	203573	226030	315479	224910	218125	179168	157433	191193	151177	195339	286117	222866	238265	318868	231189	188985	298426	283369	MOUSE
P51859	Hepatoma-derived growth factor (HDGF)	Hdgf	7	769628	678262	809930	944648	924575	987445	918556	954894	921108	1.04892e+06	1152013	791424	786799	732651	935243	702838	682367	824041	861111	MOUSE
Q99KE1	NAD-dependent malic enzyme, mitochondrial (NAD-ME) (EC 1.1.1.38) (Malic enzyme 2)	Me2	8	210363	160521	216723	322691	252621	215817	239092	225895	262178	314074	326084	368009	305036	300965	482251	296046	246784	326559	314731	MOUSE
Q921S7	39S ribosomal protein L37, mitochondrial (L37mt) (MRP-L37)	Mrpl37	6	116361	92576.4	208197	271945	342589	228693	224776	249714	130951	215850	256490	363777	203309	266231	313764	326135	223284	234133	280502	MOUSE
Q02819	Nucleobindin-1 (CALNUC)	Nucb1	6	255076	199547	262036	269633	310891	288176	256417	194501	168596	216890	245608	309143	283490	263596	333958	362525	250499	341302	225417	MOUSE
Q9R0N0	Galactokinase (EC 2.7.1.6) (Galactose kinase)	Galk1	9	668749	609150	780272	911037	1.01095e+06	1.06903e+06	789258	727222	702992	760803	818738	964820	844543	741600	1.00419e+06	987673	820752	1.06331e+06	1.08337e+06	MOUSE
Q922F4	Tubulin beta-6 chain	Tubb6	6	831731	803070	965640	1.24919e+06	954971	828234	791285	899460	881901	901449	1.08101e+06	1.07173e+06	1.03188e+06	840908	1.17193e+06	900644	745558	1.07929e+06	1.131e+06	MOUSE
A2AU62	RNA-binding protein Raly (Fragment)	Raly	1	47821	47725.7	58796.1	56711.9	37262.7	51811.8	56341.4	37799.7	44875.3	51378.7	51650.5	41996.1	49084.3	47380.6	52249.6	46704.3	50695.8	53390.6	50383.7	MOUSE
P51863	V-type proton ATPase subunit d 1 (V-ATPase subunit d 1) (P39) (Physophilin) (V-ATPase 40 kDa accessory protein) (V-ATPase AC39 subunit) (Vacuolar proton pump subunit d 1)	Atp6v0d1	9	552337	488675	646531	717141	1.00382e+06	974384	797135	596212	655956	675767	743414	751769	682708	776007	936600	791487	644124	650477	749924	MOUSE
P42208	Septin-2 (Neural precursor cell expressed developmentally down-regulated protein 5) (NEDD-5)	Septin2	8	957110	773071	1.0542e+06	1291318	1.30497e+06	946504	1.07914e+06	1091257	961984	1.01454e+06	1.24662e+06	1.05868e+06	871477	831550	1.09013e+06	1.27965e+06	1.0044e+06	1.32625e+06	1.40978e+06	MOUSE
P40336	Vacuolar protein sorting-associated protein 26A (H<beta>58 protein) (H beta 58) (Vesicle protein sorting 26A) (mVPS26)	Vps26a	8	395309	322401	460968	542228	649719	564542	525310	418368	370260	482013	510213	495607	421457	414023	529236	489994	420261	554822	555888	MOUSE
P33609	DNA polymerase alpha catalytic subunit (EC 2.7.7.7) (DNA polymerase alpha catalytic subunit p180)	Pola1	3	41043.6	37204.2	17538.8	56787.8	45020.2	62117.1	14398.7	46746.9	56162.5	55509.8	71056.2	35163.3	22917.7	33609.8	31897.9	65570.5	60457.4	66300.1	63562.1	MOUSE
O35864	COP9 signalosome complex subunit 5 (SGN5) (Signalosome subunit 5) (EC 3.4.-.-) (Jun activation domain-binding protein 1) (Kip1 C-terminus-interacting protein 2)	Cops5	8	302990	292395	383066	470185	447727	378017	427251	340933	364841	368368	398379	459818	428205	420408	529071	493024	399416	543062	561912	MOUSE
Q91YR1	Twinfilin-1 (Protein A6)	Twf1	6	414468	363745	382356	574531	565481	565181	433764	395065	366701	402502	512456	361002	443233	363994	393357	542242	450869	538190	519551	MOUSE
Q91VA7	Isocitrate dehydrogenase [NAD] subunit, mitochondrial	Idh3b	9	612636	363133	712844	769696	563307	582176	635524	565917	595415	612930	733230	666732	603885	677237	805228	727243	601888	569692	665910	MOUSE
A0A0A6YY47	Neural cell adhesion molecule 1	Ncam1	5	281387	209651	212191	371089	105676	67512.5	110555	191009	243864	282187	358222	188393	149316	166878	175874	109207	91417.7	156791	112611	MOUSE
Q3UM45	Protein phosphatase 1 regulatory subunit 7 (Protein phosphatase 1 regulatory subunit 22)	Ppp1r7	6	230030	237395	288420	402505	445298	419278	335158	369868	381878	410914	490860	452313	377646	358616	499985	361182	312218	439490	493113	MOUSE
S4R1M2	Scaffold attachment factor B1	Safb	3	92044.9	107240	122660	149825	164838	144916	130470	112733	117729	120167	137014	154818	140860	142050	194828	195726	146186	192169	181231	MOUSE
Q9CXY6	Interleukin enhancer-binding factor 2 (Nuclear factor of activated T-cells 45 kDa)	Ilf2	9	683361	609421	641129	829306	1.12343e+06	883055	762538	588656	703795	656903	766688	981738	868189	736730	914610	1.24235e+06	877623	998945	1.04689e+06	MOUSE
Q99JW2	Aminoacylase-1 (ACY-1) (EC 3.5.1.14) (N-acyl-L-amino-acid amidohydrolase)	Acy1	5	214020	75607.1	248440	274763	239398	158444	200536	116544	199514	231220	151022	142793	173921	195214	200836	151852	87611.5	177130	159772	MOUSE
Q8CHW4	Translation initiation factor eIF-2B subunit epsilon (eIF-2B GDP-GTP exchange factor subunit epsilon)	Eif2b5	5	184385	165833	213314	266377	218478	200437	195966	206253	196813	192914	236258	246348	210612	169488	267281	215642	177066	246145	254287	MOUSE
O54774	AP-3 complex subunit delta-1 (AP-3 complex subunit delta) (Adaptor-related protein complex 3 subunit delta-1) (Delta-adaptin) (mBLVR1)	Ap3d1	6	139402	120531	145058	166989	137975	105124	155432	152573	118792	136046	170087	104695	127816	127162	113354	104419	109161	146667	135405	MOUSE
Q9CQA3	Succinate dehydrogenase [ubiquinone] iron-sulfur subunit, mitochondrial (EC 1.3.5.1) (Iron-sulfur subunit of complex II) (Ip)	Sdhb	9	721924	496865	799138	987095	1.02575e+06	968442	885916	745563	697211	741986	637365	915303	876524	777792	1.00601e+06	830272	857759	881634	657219	MOUSE
G5E870	E3 ubiquitin-protein ligase TRIP12 (EC 2.3.2.26) (HECT-type E3 ubiquitin transferase TRIP12) (Thyroid receptor-interacting protein 12) (TR-interacting protein 12) (TRIP-12)	Trip12	5	62029	59884.2	86756.2	119349	115352	81948.9	107053	73556.4	72829.6	100621	120328	77844.8	80457.1	69822.4	114537	84435.8	76152.4	96820.8	97477.8	MOUSE
Q8C3W1	Uncharacterized protein C1orf198 homolog		6	124832	129417	146170	237068	198960	141130	209994	182045	134146	141712	156405	165867	169998	193778	205262	117592	80209.2	122155	182548	MOUSE
P31938	Dual specificity mitogen-activated protein kinase kinase 1 (MAP kinase kinase 1) (MAPKK 1) (EC 2.7.12.2) (ERK activator kinase 1) (MAPK/ERK kinase 1) (MEK 1)	Map2k1	2	16705.7	39784.7	34511.8	22414.1	25438.8	42293.7	18185.5	8799.68	12063.3	29699.7	30829	6690.55	23000.2	7200.15	9884.92	15513.9	26636.1	17551.4	18822.9	MOUSE
Q9WUM4	Coronin-1C (Coronin-3)	Coro1c	7	266095	244787	289738	348148	287998	302900	316821	243445	265241	277558	331251	280374	242687	233503	268845	243295	206441	284548	310569	MOUSE
Q05186	Reticulocalbin-1	Rcn1	6	281784	304571	413359	350715	378793	538730	426312	320553	285467	277758	334462	576770	523596	481120	525390	440083	406168	444416	460885	MOUSE
G3UYG6	GRB10-interacting GYF protein 2	Gigyf2	6	116964	96426.2	137933	160896	134000	139584	113593	118761	123219	134129	143031	176481	151807	119661	191289	206822	175993	212950	225963	MOUSE
P61164	Alpha-centractin (Centractin) (ARP1) (Actin-RPV) (Centrosome-associated actin homolog)	Actr1a	2	104295	73164.7	55018.9	91035	92782.8	114928	115785	101778	81963.2	55139.1	113557	104889	83265.1	90780	54518.9	121148	70035.7	115343	112482	MOUSE
Q9WVA4	Transgelin-2 (SM22-beta)	Tagln2	11	9180138	9768698	11342321	13535714	5.71178e+06	6.3893e+06	5254798	9234857	9263171	9480750	10903820	8197012	7.59098e+06	6632292	9677209	5.82731e+06	5484467	6965830	7.41874e+06	MOUSE
Q99LI7	Cleavage stimulation factor subunit 3 (CF-1 77 kDa subunit) (Cleavage stimulation factor 77 kDa subunit) (CSTF 77 kDa subunit) (CstF-77)	Cstf3	5	104477	91170.5	171006	154256	139710	105633	172790	113167	109122	144717	154829	114962	129217	123570	159256	117626	113556	143068	124441	MOUSE
E9PWB1	Pleckstrin homology-like domain family B member 1	Phldb1	1	20240.3	24070.4	18335.7	28327.2	33643.7	27865	23440.9	16811.7	8161.14	23991.1	23822.3	20312.5	16245.2	11930.2	16691.1	26313.2	15090.9	14757.4	21279.4	MOUSE
A0A0B4J1E7	Importin subunit alpha-3	Kpna4	5	204872	171880	255064	322475	307639	153280	289027	240186	261623	280345	280922	258869	239792	275806	351076	264450	210391	286513	266961	MOUSE
Q3UI33	Methionine aminopeptidase 2 (MAP 2) (MetAP 2) (EC 3.4.11.18) (Initiation factor 2-associated 67 kDa glycoprotein) (Peptidase M) (p67) (p67eIF2)	Metap2	3	68217	116330	123485	187578	166476	169412	125449	116031	107169	118304	143869	135463	124175	116444	160261	190180	139577	208146	229591	MOUSE
Q9Z1G3	V-type proton ATPase subunit C 1 (V-ATPase subunit C 1) (Vacuolar proton pump subunit C 1)	Atp6v1c1	3	81080	99498.2	74450.3	101348	74514.5	116228	75909.8	58624.7	75490	99428.2	95326.1	67228.1	66463.9	39654.4	47160.8	91493.3	110573	95574.7	98154.5	MOUSE
D4AFX6	Arf-GAP with coiled-coil, ANK repeat and PH domain-containing protein 2 (Centaurin beta 2)	Acap2	3	56757.1	59555	83945.6	102653	95052.9	90710.4	89025.1	74992	70355.6	86567.1	80038.6	84068.2	81263.9	73241.2	103655	95048.4	69579.2	95649.8	108432	MOUSE
P57784	U2 small nuclear ribonucleoprotein A' (U2 snRNP A')	Snrpa1	7	462094	456486	533295	664949	643491	577266	595296	495750	493647	549880	677088	554631	526650	494599	646154	727864	604120	710915	693711	MOUSE
Q640M1	U3 small nucleolar RNA-associated protein 14 homolog A (Juvenile spermatogonial depletion-like X-linked protein) (Jsd-like X-linked protein)	Utp14a	6	97238.5	93624	104481	156166	78285.4	126384	125658	123268	119701	147315	162851	110794	97826.5	94213.3	104393	130809	118193	118653	121006	MOUSE
E9Q411	Neuroblastoma-amplified sequence	Nbas	3	51241.2	17678.4	33701.5	48795	77832.3	53084.3	62526.6	39323.2	42246.2	47801.2	47924.3	52681.8	48930.5	43739	24452.5	61785.7	50845.1	63276.7	46170.5	MOUSE
Q3TJD7	PDZ and LIM domain protein 7 (LIM mineralization protein) (LMP) (Protein enigma)	Pdlim7	8	512233	516118	668832	799115	360922	304659	285696	603918	622399	647750	736437	477605	427708	434365	502299	282106	244551	344864	374074	MOUSE
Q9DCW4	Electron transfer flavoprotein subunit beta (Beta-ETF)	Etfb	7	806142	701826	879374	1.02195e+06	1386369	1360430	1117339	770671	721211	867398	984260	1.21077e+06	1.07848e+06	1.00602e+06	1.36694e+06	1476149	1138349	1.18859e+06	1.27177e+06	MOUSE
Q8R1X6	Spartin	Spart	5	109480	89008.7	114436	140644	165047	147314	121935	127781	121594	139115	156275	109903	106142	88551.4	139565	73345.3	97260.6	127040	114924	MOUSE
Q8CJG0	Protein argonaute-2 (Argonaute2) (mAgo2) (EC 3.1.26.n2) (Argonaute RISC catalytic component 2) (Eukaryotic translation initiation factor 2C 2) (eIF-2C 2) (eIF2C 2) (Piwi/argonaute family protein meIF2C2) (Protein slicer)	2002-08-01	5	84480.6	64988.2	96090.9	122467	103735	68293	116624	73465.4	86499.9	67329.5	82957.2	83355.9	81896.1	55908.8	56900.1	72692.2	66491.4	91141.9	126950	MOUSE
E9PYT3	Atlastin-3	Atl3	4	161566	96677.7	170958	169009	91260.3	58143.6	109926	136750	146901	192040	187241	92513.3	96365.4	95197.2	105501	103131	93983.6	116689	56302.3	MOUSE
Q9JJA4	Ribosome biogenesis protein WDR12 (WD repeat-containing protein 12)	Wdr12	7	239101	246385	284936	355804	280886	292814	295595	322752	371271	326226	382211	412953	410362	395128	485435	509093	439829	452617	448424	MOUSE
A2AH25	Rho GTPase-activating protein 1	Arhgap1	6	167522	134620	182709	230113	239635	130743	212544	132042	129264	166691	175826	260138	244779	236997	251932	183497	152583	207357	236353	MOUSE
A0A0J9YUR2	Cytospin-B	Specc1	4	56113.5	55377.4	66634.8	73947.9	63348.6	71652.2	74943.9	57088.2	52095	62434.9	71773.9	111926	63071.7	69548.1	70502.3	74999	88248.8	61826.7	156688	MOUSE
P97372	Proteasome activator complex subunit 2 (11S regulator complex subunit beta) (REG-beta) (Activator of multicatalytic protease subunit 2) (Proteasome activator 28 subunit beta) (PA28b) (PA28beta)	Psme2	8	335227	317907	452634	476691	597534	452706	525202	424152	468562	513667	558395	523218	474361	455254	574229	652892	596853	726003	808596	MOUSE
A2BE28	Ribosomal biogenesis protein LAS1L (Protein LAS1 homolog)	Las1l	7	170909	225504	297151	250953	270876	231772	195996	184825	212332	211736	232394	218157	212424	205506	296778	320296	225147	256945	361479	MOUSE
Q8C854	Myelin expression factor 2 (MEF-2) (MyEF-2)	Myef2	6	394350	363990	446139	631015	535592	461335	440207	434382	431960	457247	600474	680857	624102	641367	848571	675955	525796	599045	636836	MOUSE
Q80WQ2	Protein VAC14 homolog	Vac14	3	57794.7	59235.9	62178.5	62345.9	105666	78567.4	69627.7	56270.3	62845.9	64515.6	71434.4	44615.9	47908.4	46105.4	64024.2	61218.3	76805.7	90681.5	80313.9	MOUSE
Q924B0	Inositol-1-monophosphatase (EC 3.1.3.25)	Impa1	7	452368	434207	561187	699293	704747	763008	578213	615752	607794	638523	744402	597394	557182	488167	676200	640419	550516	664179	720757	MOUSE
P47857	ATP-dependent 6-phosphofructokinase, muscle type (ATP-PFK) (PFK-M) (EC 2.7.1.11) (6-phosphofructokinase type A) (Phosphofructo-1-kinase isozyme A) (PFK-A) (Phosphohexokinase)	Pfkm	4	63976	59223.1	95212	129859	112610	102733	84672.6	70161.5	76731.8	87738.6	112410	82557.5	74465.4	77765.3	86323.1	142035	116344	142332	175145	MOUSE
Q8C547	HEAT repeat-containing protein 5B	Heatr5b	2	8042.17	12193.9	17235.1	21410	18275.1	14171.5	19676.4	13746.8	17631.8	17053.1	19585.5	14506	11495.4	11237.9	19761	18349.4	18911.6	24178	26096.8	MOUSE
P47911	60S ribosomal protein L6 (TAX-responsive enhancer element-binding protein 107) (TAXREB107)	Rpl6	11	2.87988e+06	2.94471e+06	4.11276e+06	3.17366e+06	3.39272e+06	2.74347e+06	3.72087e+06	3062188	2.93349e+06	2883102	3.10986e+06	3365468	3343556	2.88609e+06	4256784	3.31471e+06	3.88895e+06	5036440	3.98851e+06	MOUSE
Q3TC93	HCLS1-binding protein 3 (HS1-binding protein 3) (HSP1BP-3)	Hs1bp3	5	62629.1	64352.8	66814.1	128395	137366	98686.3	175556	89950.9	81284.5	105787	105317	93535.7	101206	71297.9	101176	95389.3	56951.8	125041	112308	MOUSE
Q8BUK6	Protein Hook homolog 3 (mHK3)	Hook3	5	201648	180091	390738	315975	125554	278038	237174	142150	346495	158930	238216	392385	377768	164080	288902	221255	194683	233236	427679	MOUSE
Q91V89	Serine/threonine-protein phosphatase 2A 56 kDa regulatory subunit	Ppp2r5d	6	281800	216976	324396	377181	268064	193123	394634	309665	309391	370957	413461	205749	223047	224808	268469	207420	225045	255724	253656	MOUSE
Q9DAW9	Calponin-3 (Calponin, acidic isoform)	Cnn3	8	1.29076e+06	1.16053e+06	1.61827e+06	1.87499e+06	1.33679e+06	1.1842e+06	1.17873e+06	1199211	1120963	1.27083e+06	1.42682e+06	1.33608e+06	1.19633e+06	1.11403e+06	1.46647e+06	925961	795043	1.03746e+06	1.06627e+06	MOUSE
P10711	Transcription elongation factor A protein 1 (Transcription elongation factor S-II protein 1) (Transcription elongation factor TFIIS.o)	Tcea1	9	490227	461293	535162	629131	512037	506921	488338	644050	641791	644352	665720	475185	551031	440362	629815	515059	548149	683541	663145	MOUSE
Q9Z1Q5	Chloride intracellular channel protein 1 (Nuclear chloride ion channel 27) (NCC27)	Clic1	8	1.43706e+06	1420271	1762472	2.13982e+06	2.09563e+06	1.9941e+06	1.91169e+06	1.73956e+06	1904186	1.85242e+06	2.2e+06	1.80738e+06	1.7403e+06	1.57328e+06	2.17937e+06	1.45255e+06	1.4352e+06	1789652	1.92275e+06	MOUSE
P26645	Myristoylated alanine-rich C-kinase substrate (MARCKS)	Marcks	8	406481	314094	418702	373840	444745	566581	511678	289822	324914	371298	330673	384717	391691	309312	445542	375722	378477	395483	388248	MOUSE
Q921F2	TAR DNA-binding protein 43 (TDP-43)	Tardbp	11	911713	769623	1.09485e+06	1.31864e+06	1460813	1010475	1316335	1.04992e+06	996014	1.10391e+06	1.18636e+06	1.46766e+06	1.30463e+06	1.30814e+06	1.71186e+06	1.98096e+06	1.53091e+06	1.60646e+06	1.65312e+06	MOUSE
Q9QXX4	Calcium-binding mitochondrial carrier protein Aralar2 (Citrin) (Mitochondrial aspartate glutamate carrier 2) (Solute carrier family 25 member 13)	Slc25a13	6	154443	134335	242441	236415	362767	287141	167026	280102	150593	179453	267778	399203	272444	345746	374662	270531	153367	204412	263534	MOUSE
E9PU96	Nucleolar pre-ribosomal-associated protein 1	Urb1	2	20594.9	16857.7	20581.5	28269.2	9396.69	7522.66	11101.6	17866.6	19894.4	22079.2	27850	14220.4	16942.3	9032.37	18036.8	24391.9	18099.6	23876.9	25421.2	MOUSE
Q61687	Transcriptional regulator ATRX (EC 3.6.4.12) (ATP-dependent helicase ATRX) (HP1 alpha-interacting protein) (HP1-BP38 protein) (Heterochromatin protein 2) (X-linked nuclear protein)	Atrx	6	84516.2	74098.7	76641.5	85009.3	86793.1	170991	145608	65110.7	92585.4	82165	129316	93737.8	95102.7	81990.3	103679	123706	101410	102353	111598	MOUSE
H7BX95	Serine/arginine-rich splicing factor 1 (Splicing factor, arginine/serine-rich 1)	Srsf1	11	808322	712209	957785	1.1115e+06	852214	1.08918e+06	892296	736053	794839	904748	1.0763e+06	1079100	1.00049e+06	909335	1.19116e+06	1.33209e+06	1.0333e+06	1.16185e+06	1.16749e+06	MOUSE
Q0VBL3	RNA-binding protein 15 (One-twenty two protein 1) (RNA-binding motif protein 15)	Rbm15	7	93601.9	75554.3	199257	141457	203978	98328.5	244238	178670	109520	119886	127102	192702	108074	100113	107820	132507	258075	99862.4	143341	MOUSE
P28474	Alcohol dehydrogenase class-3 (EC 1.1.1.1) (Alcohol dehydrogenase 2) (Alcohol dehydrogenase 5) (Alcohol dehydrogenase B2) (ADH-B2) (Alcohol dehydrogenase class-III) (Glutathione-dependent formaldehyde dehydrogenase) (FALDH) (FDH) (GSH-FDH) (EC 1.1.1.-) (S-(hydroxymethyl)glutathione dehydrogenase) (EC 1.1.1.284)	Adh5	8	253567	221115	337767	329858	351999	291020	365886	338766	318797	334785	369454	264098	268054	213737	331961	319305	264803	312657	314403	MOUSE
Q9QYR9	Acyl-coenzyme A thioesterase 2, mitochondrial (Acyl-CoA thioesterase 2) (EC 3.1.2.2) (Acyl coenzyme A thioester hydrolase) (MTE-I) (Very-long-chain acyl-CoA thioesterase)	Acot2	7	364797	254774	379497	427400	396431	264932	336782	339677	302813	371825	424152	266137	233302	249540	292518	150366	147504	177001	142490	MOUSE
P68254	14-3-3 protein theta (14-3-3 protein tau)	Ywhaq	9	529132	819426	1.02958e+06	628357	578768	1.09181e+06	1065570	970098	909027	908270	953531	886491	840391	677040	672973	890804	832851	1.08114e+06	1049347	MOUSE
P61290	Proteasome activator complex subunit 3 (11S regulator complex subunit gamma) (REG-gamma) (Activator of multicatalytic protease subunit 3) (Ki nuclear autoantigen) (Proteasome activator 28 subunit gamma) (PA28g) (PA28gamma)	Psme3	7	502424	532862	653071	864570	641129	522722	636513	621223	606349	656277	847036	727361	580136	628679	781911	1.09232e+06	854040	1.14275e+06	1191403	MOUSE
A0A0G2JFJ6	Integrator complex subunit 3	Ints3	6	139799	69853.7	173952	175293	182884	97277.6	159312	130099	132964	170369	193777	183595	135830	114168	227451	207072	165249	342820	225248	MOUSE
G3X972	Sec24-related gene family, member C (S. cerevisiae)	Sec24c	7	88466.7	111067	124213	184016	148916	128581	170299	103367	117711	129998	155840	121691	105572	120405	146101	126407	102494	164507	179996	MOUSE
Q8R016	Bleomycin hydrolase (BH) (BLM hydrolase) (BMH) (EC 3.4.22.40)	Blmh	7	290811	236639	311637	392518	318526	222823	288221	248318	202086	255844	315637	294605	249973	235070	324857	329585	262676	373118	411372	MOUSE
P36916	Guanine nucleotide-binding protein-like 1 (GTP-binding protein MMR1)	Gnl1	4	105823	87597	98304.9	83291.1	118046	286533	169860	89065.8	81778.6	83950.2	93258.6	216009	61829.1	39376.8	66257.4	49821.3	57649.5	90385.1	75652	MOUSE
O55222	Integrin-linked protein kinase (EC 2.7.11.1) (59 kDa serine/threonine-protein kinase) (Beta-integrin-linked kinase) (ILK-1) (ILK-2) (p59ILK)	Ilk	8	517263	529464	743638	930030	664361	636555	640951	570161	589688	682877	774448	681094	657344	624156	777535	629902	531712	722416	761729	MOUSE
Q91Z25	Actin-related protein 2/3 complex subunit	Arpc1b	5	540083	524182	617770	734079	666666	783078	661311	532488	594963	662737	762583	593561	638264	545041	717602	650107	603787	705481	734006	MOUSE
Q99M31	Heat shock 70 kDa protein 14 (NST-1) (hsr.1)	Hspa14	5	188126	201940	225784	291758	277573	170490	116169	150680	146342	158008	276760	192181	146657	164771	372338	164053	150514	308062	205003	MOUSE
P32233	Developmentally-regulated GTP-binding protein 1 (DRG-1) (Neural precursor cell expressed developmentally down-regulated protein 3) (NEDD-3) (Translation factor GTPase DRG1) (TRAFAC GTPase DRG1) (EC 3.6.5.-)	Drg1	6	295782	319946	416279	525102	370175	335225	345852	376703	355504	395145	562643	366180	374700	328128	452776	318827	322254	498439	515009	MOUSE
Q60737	Casein kinase II subunit alpha (CK II alpha) (EC 2.7.11.1)	Csnk2a1	8	323716	258157	324909	421904	356985	323704	343114	314278	291532	327751	401732	396138	371500	374021	500265	435990	335103	427462	443705	MOUSE
A0A668KLV9	A-kinase anchor protein 12	Akap12	1	6332.62	5281.52	6424.26	2933.64	4388.84	4097.72	4115.79	3611.67	5836.25	5088.59	7359.08	5411.68	4357.32	2970.88	2272.73	12051.2	5892.35	4239.11	6970.17	MOUSE
Q9CYG7	Mitochondrial import receptor subunit TOM34 (Translocase of outer membrane 34 kDa subunit)	Tomm34	8	235402	203958	273786	328459	264004	259698	265388	230494	206248	264926	292524	243396	272275	226781	335861	271485	279833	361318	334706	MOUSE
Q9Z1M8	Protein Red (Cytokine IK) (IK factor) (Protein RER)	Ik	4	82248.5	85849.7	88607.7	114859	100254	108485	101581	87873.3	82339.6	93354.9	107540	89561.4	96926.6	90744	112231	133916	135594	126240	114253	MOUSE
O54734	Dolichyl-diphosphooligosaccharide--protein glycosyltransferase 48 kDa subunit (DDOST 48 kDa subunit) (Oligosaccharyl transferase 48 kDa subunit)	Ddost	5	696658	600311	843306	1.01672e+06	680147	585738	365684	635253	667919	774694	949224	816924	705926	713704	637848	770771	595481	708847	876509	MOUSE
Q8VH51	RNA-binding protein 39 (Coactivator of activating protein 1 and estrogen receptors) (Coactivator of AP-1 and ERs) (RNA-binding motif protein 39) (RNA-binding region-containing protein 2)	Rbm39	10	651688	651813	787215	795105	577256	712607	815478	507402	760900	418726	631725	865144	727562	821416	1.08284e+06	1.14898e+06	936923	1.09255e+06	1.12417e+06	MOUSE
A0A5F8MPN8	Malate dehydrogenase (EC 1.1.1.37)	Mdh1	8	837932	689799	955912	971125	1198620	880279	1091566	807072	826984	999400	964568	794635	833111	755207	1.02502e+06	974060	966435	1.20975e+06	1.30657e+06	MOUSE
Q9CQE8	RNA transcription, translation and transport factor protein	RTRAF	9	501445	477833	625219	817268	750469	553010	641945	608554	550081	629451	735525	721356	560294	581628	748323	828567	645309	651890	791854	MOUSE
Q05CL8	La-related protein 7 (La ribonucleoprotein domain family member 7)	Larp7	6	121456	114652	199383	216905	476445	145963	386958	130098	146937	190703	192150	431433	396470	119472	123086	210584	438122	164091	567820	MOUSE
P63005	Platelet-activating factor acetylhydrolase IB subunit beta (Lissencephaly-1 protein) (LIS-1) (PAF acetylhydrolase 45 kDa subunit) (PAF-AH 45 kDa subunit) (PAF-AH alpha) (PAFAH alpha)	Pafah1b1	10	383612	423071	543260	612823	538672	584979	541974	358407	374066	478784	474354	537698	485077	455005	622591	521653	470373	510269	533280	MOUSE
Q99KG3	RNA-binding protein 10 (RNA-binding motif protein 10)	Rbm10	5	68403	82892.8	104762	118967	102662	71902.1	89533.7	75388	60202.6	105431	104542	129862	117929	88730.7	151958	167758	118712	135077	105043	MOUSE
Q61081	Hsp90 co-chaperone Cdc37 (Hsp90 chaperone protein kinase-targeting subunit) (p50Cdc37) [Cleaved into: Hsp90 co-chaperone Cdc37, N-terminally processed]	Cdc37	8	520990	506754	646041	804346	1.00779e+06	929647	905775	593566	582256	625094	770053	625344	563176	535989	686719	646924	529684	670692	715657	MOUSE
Q921W4	Quinone oxidoreductase-like protein 1 (EC 1.-.-.-) (Quinone oxidoreductase homolog 1) (QOH-1) (Zeta-crystallin homolog)	Cryzl1	5	122735	125179	157302	204507	133348	146094	116308	150133	144956	184549	190013	156203	145864	104476	190102	152378	135918	166354	178717	MOUSE
P48774	Glutathione S-transferase Mu 5 (EC 2.5.1.18) (Fibrous sheath component 2) (Fsc2) (GST class-mu 5)	Gstm5	6	262624	202866	284910	353148	409100	334105	389731	301623	284442	336099	375599	310244	247282	281750	348495	283047	266237	242938	377881	MOUSE
Q9DBX5	Phospholipase A2 (EC 3.1.1.4)	Pla2g4a	6	179134	240795	225829	448802	291126	268834	270049	318350	334377	323340	428717	331065	288019	196715	388341	230525	210750	221646	400903	MOUSE
Q8BFW7	Lipoma-preferred partner homolog	Lpp	10	574055	555231	657955	761896	515298	555149	504302	504157	485885	567088	636725	660783	605096	557833	765419	352192	392134	475167	532041	MOUSE
Q9QZQ8	Core histone macro-H2A.1 (Histone macroH2A1) (mH2A1) (H2A.y) (H2A/y)	Macroh2a1	4	201752	141032	193891	242068	157793	149345	163863	190775	157625	217012	253311	138207	120854	122557	158416	159362	113094	137458	144891	MOUSE
A0A6Q6PUT5	Pre-mRNA-processing factor 40 homolog A (Fragment)	Prpf40a	7	224072	187396	239186	317606	433650	349676	327075	261376	237055	262721	328057	419877	353430	352222	487413	500124	371230	442570	476841	MOUSE
Q9QUM9	Proteasome subunit alpha type-6 (Macropain iota chain) (Multicatalytic endopeptidase complex iota chain) (Proteasome iota chain)	Psma6	9	1.05488e+06	948532	1.1477e+06	1.49249e+06	1.32247e+06	1.43185e+06	1.25049e+06	1.04056e+06	1.10624e+06	1.1866e+06	1.3262e+06	1.37518e+06	1.17224e+06	1.09962e+06	1.59262e+06	1.60756e+06	1.23347e+06	1.50147e+06	1.7218e+06	MOUSE
G3X9T8	Ceruloplasmin	Cp	3	76183.6	48640.4	98069.1	107478	165774	128609	139471	68478	87486.7	121799	150557	69312.7	61554.1	86926.9	126115	118159	136909	168682	131847	MOUSE
E9PZF0	Nucleoside diphosphate kinase (EC 2.7.4.6)	Gm20390	4	2.16579e+06	2.00461e+06	2.90284e+06	3.33796e+06	3078037	1.90148e+06	2.85818e+06	2.55904e+06	2.67355e+06	2.9837e+06	3.32524e+06	2.83668e+06	2672878	2.65694e+06	3.61373e+06	2727642	2.57658e+06	3379958	3530589	MOUSE
Q99LB4	Macrophage-capping protein (Actin regulatory protein CAP-G)	Capg	8	920191	811701	1.06072e+06	1.2073e+06	1748434	1.82517e+06	1.63199e+06	1122535	1.10533e+06	1173021	1.31463e+06	962792	956033	788477	1.14425e+06	1.17805e+06	1.09263e+06	1.37938e+06	1.35583e+06	MOUSE
Q9Z2N8	Actin-like protein 6A (53 kDa BRG1-associated factor A) (Actin-related protein Baf53a) (BRG1-associated factor 53A) (BAF53A)	Actl6a	7	370666	372118	447463	480044	528384	506134	408122	413569	457428	404063	475265	554561	509802	448966	610158	697397	530527	605013	621004	MOUSE
Q9Z2I9	Succinate--CoA ligase [ADP-forming] subunit beta, mitochondrial (EC 6.2.1.5) (ATP-specific succinyl-CoA synthetase subunit beta) (A-SCS) (Succinyl-CoA synthetase beta-A chain) (SCS-betaA)	Sucla2	7	273983	275432	395683	420618	471216	391961	375435	331280	282622	348559	401754	474557	389530	365154	487409	464727	376767	409517	451605	MOUSE
Q9CPR5	39S ribosomal protein L15, mitochondrial (L15mt) (MRP-L15)	Mrpl15	4	151236	132738	149943	192098	145710	130720	128122	161327	135034	175341	187657	173055	136525	166391	171976	156721	132486	164335	174009	MOUSE
Q8CIG8	Protein arginine N-methyltransferase 5 (Prmt5) (EC 2.1.1.320) (Histone-arginine N-methyltransferase PRMT5) (Jak-binding protein 1) (Shk1 kinase-binding protein 1 homolog) (SKB1 homolog)	Prmt5	4	78116	71246.7	91600.8	61099.8	94040.3	98953.7	77971.7	86203.7	83760.9	90249.3	78648.6	69373.5	84479.3	72521.8	102595	69550.6	93605.2	128635	135678	MOUSE
Q8CCJ3	E3 UFM1-protein ligase 1 (EC 2.3.2.-) (E3 UFM1-protein transferase 1) (Multiple alpha-helix protein located at ER) (Regulator of C53/LZAP and DDRGK1)	Ufl1	5	851590	814550	1.02979e+06	1295899	1.16602e+06	816326	1.24819e+06	921453	1.13897e+06	1282683	1.41146e+06	856627	1.01989e+06	1.04462e+06	1.2775e+06	786947	904012	1.28104e+06	1.19206e+06	MOUSE
Q99JX4	Eukaryotic translation initiation factor 3 subunit M (eIF3m) (PCI domain-containing protein 1)	Eif3m	6	257040	246780	300731	416679	387476	335072	303132	303259	289112	293665	372315	394770	321105	292591	407910	368139	269234	384763	431975	MOUSE
Q9DB05	Alpha-soluble NSF attachment protein (SNAP-alpha) (N-ethylmaleimide-sensitive factor attachment protein alpha)	Napa	9	480652	453844	529889	593840	565904	492469	527042	536830	502169	559360	610707	654856	583671	488184	722786	664209	461767	631185	694565	MOUSE
A0A0R4J114	UTP25 small subunit processome component	Utp25	4	68917.2	86967.3	91525	96823.2	54711.5	43323.4	43360	86457.1	82060.8	79781.9	117254	81440.8	60685.9	85413.4	70946.7	88762.2	81135.9	101528	100223	MOUSE
Q7TT50	Serine/threonine-protein kinase MRCK beta (EC 2.7.11.1) (CDC42-binding protein kinase beta) (DMPK-like beta) (Myotonic dystrophy kinase-related CDC42-binding kinase beta) (MRCK beta) (Myotonic dystrophy protein kinase-like beta)	Cdc42bpb	2	9957.89	9518.06	11556.2	8429.44	21931.9	11913.6	12193.8	12949.1	10519.2	12411.4	8875.5	14204	12147.8	8269.4	17277.2	21901.2	4506.01	17016.4	5441.93	MOUSE
Q8VDC1	FYVE and coiled-coil domain-containing protein 1	Fyco1	1	9346.4	3771.62	6708.25	29112.6	7397.85	51112.1	3729.74	7203.9	1856.33	5365.98	12925.9	40764.9	722.729	6463.81	9962.08	5559.87	49058.4	10061.8	10658.1	MOUSE
A2A7A7	GDH/6PGL endoplasmic bifunctional protein	H6pd	5	95248.8	86032	120195	156952	209517	93541.3	152388	131894	87026.7	129768	145270	118530	111164	149622	161073	159808	124423	113929	153558	MOUSE
Q8JZM7	Parafibromin (Cell division cycle protein 73 homolog) (Hyperparathyroidism 2 protein homolog)	Cdc73	5	69854.2	68841.2	80839.8	111369	114035	80006.8	65372.4	86123.7	117786	114199	120602	107489	119297	130710	131841	173352	140701	164103	196847	MOUSE
Q80SW1	S-adenosylhomocysteine hydrolase-like protein 1 (IP3R-binding protein released with inositol 1,4,5-trisphosphate) (Putative adenosylhomocysteinase 2) (S-adenosyl-L-homocysteine hydrolase 2) (AdoHcyase 2)	Ahcyl1	2	39568.3	38199	51561	48029.6	58582.4	42031.4	49261.4	41688.7	45264.7	45897.6	52989.2	55095.2	34645.8	25857.2	75233.6	31573.3	31684.2	42574.5	41003.5	MOUSE
Q80X82	Symplekin	Sympk	4	71840.4	42327.5	59525.6	87727.1	82492.9	31077	65856.5	55757.9	56840.1	85281.7	68257.3	86738.4	68542	76410.1	81490.8	104865	81286.3	98400.8	82779.3	MOUSE
Q8JZK9	Hydroxymethylglutaryl-CoA synthase, cytoplasmic (HMG-CoA synthase) (EC 2.3.3.10) (3-hydroxy-3-methylglutaryl coenzyme A synthase)	Hmgcs1	6	126989	147659	185264	379993	371653	143276	141738	107653	132611	89593.5	121457	188147	180023	168722	197738	148295	100404	158321	177741	MOUSE
Q8JZZ5	Phosphatidylinositol transfer protein beta isoform (Pitpnb protein)	Pitpnb	4	280269	295885	305874	367931	414445	348976	330955	277010	272773	352900	333922	251099	292393	299614	418502	345033	337142	211623	404227	MOUSE
P58389	Serine/threonine-protein phosphatase 2A activator (EC 5.2.1.8) (PP2A, subunit B', PR53 isoform) (Phosphotyrosyl phosphatase activator) (PTPA) (Serine/threonine-protein phosphatase 2A regulatory subunit 4) (Serine/threonine-protein phosphatase 2A regulatory subunit B')	Ptpa	5	264698	424797	543466	403114	429133	355982	325217	323646	501986	547489	691065	569431	367561	490423	481424	326541	262048	334856	527990	MOUSE
A0A0J9YUZ4	High mobility group protein 1 (High mobility group protein B1) (Fragment)	Hmgb1	7	824288	811692	860634	909597	681114	795894	643572	697540	746381	802959	870432	785918	760527	579626	876632	666722	686332	834759	852882	MOUSE
Q3ULW8	Protein mono-ADP-ribosyltransferase PARP3 (EC 2.4.2.-) (ADP-ribosyltransferase diphtheria toxin-like 3) (ARTD3) (DNA ADP-ribosyltransferase PARP3) (EC 2.4.2.-) (NAD(+) ADP-ribosyltransferase 3) (ADPRT-3) (Poly [ADP-ribose] polymerase 3) (PARP-3) (Poly[ADP-ribose] synthase 3) (pADPRT-3)	Parp3	7	362967	300724	299152	300233	305573	167895	294515	236142	273442	271178	254129	296060	281818	247664	279622	325957	294812	367394	365792	MOUSE
P21956	Lactadherin (MFGM) (Milk fat globule-EGF factor 8) (MFG-E8) (SED1) (Sperm surface protein SP47) (MP47)	Mfge8	7	578981	515577	549719	637444	656008	531966	447674	440979	430136	487612	532887	706801	605175	542966	746108	582763	463415	500132	527225	MOUSE
Q9JHJ0	Tropomodulin-3 (Ubiquitous tropomodulin) (U-Tmod)	Tmod3	7	419959	418355	482956	725058	791117	790565	664688	485187	441303	483799	630405	556216	460053	498144	595180	572112	488518	567101	561645	MOUSE
G3UXW9	COP9 signalosome complex subunit 1	Gps1	8	694226	512616	425788	632821	606974	595884	564231	451344	449730	488056	579063	486491	548298	480375	669888	656724	576775	751440	775671	MOUSE
Q9CX34	Protein SGT1 homolog (Suppressor of G2 allele of SKP1 homolog)	Sugt1	2	38164.9	35964	48082.3	56789.1	57621	37147.7	52867.8	45316.5	48118.8	52924.8	47375.4	61104.2	54347.1	52241.4	71163.7	50470.4	50520.5	53811.4	57050.1	MOUSE
A2AFF6	Cohesin subunit SA-2	Stag2	3	32522.8	52628	52290.3	99481.3	99543.5	79097.8	91298.3	66648.8	57444.8	39162.6	82852.5	87296.3	29229.2	44515.7	46994.9	114916	89846.5	109492	39809.1	MOUSE
Q6ZQL4	WD repeat-containing protein 43	Wdr43	7	263578	273618	348101	450914	387917	332864	272233	396502	415969	444734	461364	409351	377354	398086	454765	573710	357115	521196	514832	MOUSE
Q9JMH6	Thioredoxin reductase 1, cytoplasmic (TR) (EC 1.8.1.9) (Thioredoxin reductase TR1)	Txnrd1	8	319033	221973	304840	368626	433678	316522	363749	304140	301130	325718	399631	425904	359074	359873	404023	402872	317825	418319	443218	MOUSE
Q9JLB0	MAGUK p55 subfamily member 6 (Dlgh4 protein) (P55T protein) (Protein associated with Lin-7 2)	Mpp6	5	157606	126590	182259	169806	219036	236071	234515	205318	196032	216812	274827	190639	218804	168447	266759	340708	260027	374793	387466	MOUSE
P35486	Pyruvate dehydrogenase E1 component subunit alpha, somatic form, mitochondrial (EC 1.2.4.1) (PDHE1-A type I)	Pdha1	5	302824	274873	363619	439292	374740	446530	309676	341756	333868	280050	454831	396697	327106	333681	447960	366734	305216	325637	335688	MOUSE
P24369	Peptidyl-prolyl cis-trans isomerase B (PPIase B) (EC 5.2.1.8) (CYP-S1) (Cyclophilin B) (Rotamase B) (S-cyclophilin) (SCYLP)	Ppib	6	2.55961e+06	2229972	2772637	3.50116e+06	3.26707e+06	2973639	2.84349e+06	2.48369e+06	2.33742e+06	2.76758e+06	3.10038e+06	3.27908e+06	2.99352e+06	2.77275e+06	3.57443e+06	3280659	2.61831e+06	3.08271e+06	3.08324e+06	MOUSE
P50396	Rab GDP dissociation inhibitor alpha (Rab GDI alpha) (Guanosine diphosphate dissociation inhibitor 1) (GDI-1)	Gdi1	5	179447	169448	210514	241521	266891	235913	207631	180263	65771.4	208054	238751	230263	194131	175608	251422	185749	162215	199766	219427	MOUSE
E9Q197	Glyoxalase domain-containing protein 4	Glod4	8	464743	406338	487024	636877	753413	807220	680114	472751	415123	435013	587038	481624	677810	467861	600883	544701	492190	506383	467158	MOUSE
Q8R550	SH3 domain-containing kinase-binding protein 1 (Regulator of ubiquitous kinase) (Ruk) (SH3-containing, expressed in tumorigenic astrocytes)	Sh3kbp1	5	122721	107052	119941	159956	132685	129653	111432	104344	88887.3	95617.9	120519	96938.8	84868.9	81772.9	107985	155092	136190	180980	192498	MOUSE
A0A1Y7VKY1	40S ribosomal protein S18	Rps18-ps5	6	4.53947e+06	4698522	5654951	6.34131e+06	4630769	4742644	4.25264e+06	4.93432e+06	5.13894e+06	5564413	6.25906e+06	4.84652e+06	4.16352e+06	3.75104e+06	5.31672e+06	4057588	3724976	5.2307e+06	5.65666e+06	MOUSE
Q64433	10 kDa heat shock protein, mitochondrial (Hsp10) (10 kDa chaperonin) (Chaperonin 10) (CPN10)	Hspe1	5	6.20167e+06	6.00794e+06	7.48685e+06	9420444	10598420	9790434	8.36933e+06	8781909	8.36896e+06	9734566	10958342	12644653	11093266	11213974	14946058	13128836	9763129	10894242	11507816	MOUSE
Q9D281	Protein Noxp20 (Nervous system overexpressed protein 20) (Protein FAM114A1)	Fam114a1	4	167866	154023	200359	232082	290345	272532	215283	105233	81002.2	94790.8	142035	230494	173836	202518	218341	227639	135904	178603	216139	MOUSE
O55234	Proteasome subunit beta type-5 (EC 3.4.25.1) (Macropain epsilon chain) (Multicatalytic endopeptidase complex epsilon chain) (Proteasome chain 6) (Proteasome epsilon chain) (Proteasome subunit X)	Psmb5	7	1.17295e+06	1.24026e+06	1464011	1644081	1.50363e+06	1.59169e+06	1.48972e+06	1.30671e+06	1.41294e+06	1481753	1.59801e+06	1.41031e+06	1499836	1.31529e+06	1.76369e+06	1.59997e+06	1.60658e+06	1.84354e+06	1.94683e+06	MOUSE
Q6PF96	Electron transfer flavoprotein-ubiquinone oxidoreductase (ETF-QO) (EC 1.5.5.1)	Etfdh	4	288406	274979	334865	373469	101701	69718.9	555005	306934	81363.1	364347	78145	81112.8	469586	386434	97958.3	505868	568943	67199.3	467854	MOUSE
P97452	Ribosome biogenesis protein BOP1 (Block of proliferation 1 protein)	Bop1	6	215478	206046	238414	239882	239406	191817	191672	254087	280681	308555	234699	305633	314312	306611	326495	449029	346927	409995	386406	MOUSE
Q08943	FACT complex subunit SSRP1 (Facilitates chromatin transcription complex subunit SSRP1) (Recombination signal sequence recognition protein 1) (Structure-specific recognition protein 1) (T160)	Ssrp1	5	155438	153604	160141	301871	285261	278643	216855	178368	162129	210942	231237	203762	214726	173941	274448	277992	206269	263416	256629	MOUSE
A0A0A6YW28	Ubiquitin carboxyl-terminal hydrolase (EC 3.4.19.12)	Usp4	5	88661.3	82888.6	94471.2	142038	124922	109381	99944.3	86033.4	87309	91142.1	111494	124568	95828.1	99147.7	127547	139384	103213	141084	152022	MOUSE
P48758	Carbonyl reductase [NADPH] 1 (EC 1.1.1.184) (15-hydroxyprostaglandin dehydrogenase [NADP(+)]) (EC 1.1.1.196) (EC 1.1.1.197) (20-beta-hydroxysteroid dehydrogenase) (NADPH-dependent carbonyl reductase 1) (Prostaglandin 9-ketoreductase) (PG-9-KR) (Prostaglandin-E(2) 9-reductase) (EC 1.1.1.189)	Cbr1	5	166978	135782	183080	207289	183636	170058	178837	143282	149140	176059	127034	175023	167663	160593	216266	152816	127502	168152	164423	MOUSE
Q9D662	Protein transport protein Sec23B (SEC23-related protein B)	Sec23b	7	135228	123108	213985	220823	138854	130910	174893	147761	146731	175130	170204	208691	199040	173753	215758	145049	143656	198353	209401	MOUSE
A0A2C9F2A2	Ras and Rab interactor 1	Rin1	6	124114	120458	141741	195331	196501	186822	163712	121698	132715	152416	190829	113929	121295	92045.9	128516	157161	91804.2	149107	152897	MOUSE
F8WGL3	Cofilin, non-muscle isoform (Cofilin-1)	Cfl1	6	3.84837e+06	3013544	3851424	4630022	5.48126e+06	3807226	4276512	4.11637e+06	4.00492e+06	4331329	5.17631e+06	4623607	4.2058e+06	3.77972e+06	4.76767e+06	3.83382e+06	3.41216e+06	4404795	4384343	MOUSE
Q01320	DNA topoisomerase 2-alpha (EC 5.6.2.2) (DNA topoisomerase II, alpha isozyme)	Top2a	3	43906.7	54381.3	46678.6	67462.1	41560	28729.4	33902	40895.9	50712	45218.3	61715.3	37440.1	41430.4	17588.8	46202.9	56205.9	56348.7	79869.2	67796.2	MOUSE
E9Q512	Thyroid hormone receptor interactor 11	Trip11	3	134539	133320	139799	174952	193786	227286	204256	130990	134938	124417	155501	150105	155634	111936	208815	175402	166788	193930	202314	MOUSE
Q9Z1D1	Eukaryotic translation initiation factor 3 subunit G (eIF3g) (Eukaryotic translation initiation factor 3 RNA-binding subunit) (eIF-3 RNA-binding subunit) (Eukaryotic translation initiation factor 3 subunit 4) (eIF-3-delta) (eIF3 p42) (eIF3 p44)	Eif3g	6	293534	269432	349180	452731	363638	342429	310895	254330	307096	326324	397176	324690	326976	278984	310175	345548	318232	414755	451608	MOUSE
Q5XJF6	Ribosomal protein	Rpl10a	7	1206138	1.09844e+06	1.24217e+06	1325968	924470	879544	959967	1.0917e+06	1.12947e+06	1.26328e+06	1.2562e+06	680931	932823	689928	760708	837004	1.02074e+06	1.3098e+06	835851	MOUSE
Q9Z2X1	Heterogeneous nuclear ribonucleoprotein F (hnRNP F) [Cleaved into: Heterogeneous nuclear ribonucleoprotein F, N-terminally processed]	Hnrnpf	8	1.17971e+06	1085799	1.41971e+06	1.57268e+06	1.5964e+06	1.40896e+06	1.58373e+06	1.44197e+06	1431237	1.57324e+06	1688105	1.65519e+06	1.54655e+06	1.42343e+06	1.94686e+06	2.58993e+06	2.27378e+06	2446057	2621899	MOUSE
Q62418	Drebrin-like protein (Actin-binding protein 1) (SH3 domain-containing protein 7)	Dbnl	9	281913	277768	305935	339527	392689	458805	371192	308236	263257	298893	323192	348953	316117	297201	383337	323490	304363	421588	394393	MOUSE
A0A0G2JEC4	Endophilin-B1 (SH3 domain-containing GRB2-like protein B1)	Sh3glb1	8	245544	256111	305892	352458	353973	319228	339205	266397	280253	287077	330363	319413	282044	267024	280383	333985	264454	312600	335221	MOUSE
P62960	Y-box-binding protein 1 (YB-1) (CCAAT-binding transcription factor I subunit A) (CBF-A) (DNA-binding protein B) (DBPB) (Enhancer factor I subunit A) (EFI-A) (Nuclease-sensitive element-binding protein 1) (Y-box transcription factor)	Ybx1	7	510192	551769	624460	639688	441903	518434	552321	503108	550485	576003	625386	442024	517266	402636	600809	535645	579910	689941	643266	MOUSE
Q61576	Peptidyl-prolyl cis-trans isomerase FKBP10 (PPIase FKBP10) (EC 5.2.1.8) (65 kDa FK506-binding protein) (65 kDa FKBP) (FKBP-65) (FK506-binding protein 10) (FKBP-10) (Immunophilin FKBP65) (Rotamase)	Fkbp10	6	535555	459924	612563	736637	158304	197217	97350.9	517456	447484	552334	605310	772903	651965	673195	869536	865473	654749	795881	830216	MOUSE
P62754	40S ribosomal protein S6 (Phosphoprotein NP33)	Rps6	6	2.51487e+06	2.5011e+06	3.00708e+06	2503907	1.54655e+06	1.48336e+06	1606807	2272425	2.35858e+06	2.54171e+06	2616471	1626719	1.61776e+06	1.26667e+06	1820165	1336920	1.49928e+06	2.0588e+06	1.83982e+06	MOUSE
P35235	Tyrosine-protein phosphatase non-receptor type 11 (EC 3.1.3.48) (Protein-tyrosine phosphatase SYP) (SH-PTP2) (SHP-2) (Shp2)	Ptpn11	4	59511.4	63148.7	71395.3	115613	65507.2	72835.4	48808	58673.5	61928.5	57070.8	74448.1	80357.7	56913.2	60639.5	88638.9	66990.8	66805	66780.8	77591.8	MOUSE
A0A5F8MPK9	Phosphatidylinositol-3-phosphatase SAC1	Sacm1l	4	164188	142101	178688	218096	55719.7	85948.6	100977	135764	148873	191720	218140	72666.4	77583.5	88081.5	90516.4	104141	49683.4	118234	76431.8	MOUSE
O70194	Eukaryotic translation initiation factor 3 subunit D (eIF3d) (Eukaryotic translation initiation factor 3 subunit 7) (eIF-3-zeta) (eIF3 p66)	Eif3d	7	540640	535872	660153	774342	540394	493490	576932	519681	593006	617621	718907	499136	547216	413862	618476	547574	549694	766458	733855	MOUSE
P28352	DNA-(apurinic or apyrimidinic site) endonuclease (EC 3.1.-.-) (APEX nuclease) (APEN) (Apurinic-apyrimidinic endonuclease 1) (AP endonuclease 1) (REF-1) (Redox factor-1) [Cleaved into: DNA-(apurinic or apyrimidinic site) endonuclease, mitochondrial]	Apex1	6	381230	317329	440996	490511	409803	340609	419724	400074	417209	464330	474736	361577	371973	313436	421644	377126	385760	467568	453615	MOUSE
Q9CWK8	Sorting nexin-2	Snx2	5	110709	106052	120222	155679	186506	168777	142511	121213	99407.6	110381	129139	143592	113952	119050	149351	141378	106269	163196	173073	MOUSE
O08582	GTP-binding protein 1 (G-protein 1) (GP-1) (GP1)	Gtpbp1	7	189246	143905	215155	269996	189094	173389	190917	200692	196352	202720	246349	160670	162133	160958	193285	298640	257564	378008	394814	MOUSE
Q8BH74	Nuclear pore complex protein Nup107 (107 kDa nucleoporin) (Nucleoporin Nup107)	Nup107	6	138866	109940	170687	217518	214158	168706	190255	117055	120406	164234	222854	206224	166602	190446	274427	304169	206865	236090	277256	MOUSE
O70503	Very-long-chain 3-oxoacyl-CoA reductase (EC 1.1.1.330) (17-beta-hydroxysteroid dehydrogenase 12) (17-beta-HSD 12) (3-ketoacyl-CoA reductase) (KAR) (Estradiol 17-beta-dehydrogenase 12) (EC 1.1.1.62) (KIK-I)	Hsd17b12	4	282273	251305	283472	405208	127004	130472	152266	272168	292211	359391	367339	201962	178892	209240	157374	159246	158827	205723	144281	MOUSE
Q922Q4	Pyrroline-5-carboxylate reductase 2 (P5C reductase 2) (P5CR 2) (EC 1.5.1.2)	Pycr2	5	235100	346906	423788	421959	406260	358582	352693	320929	362680	392575	426878	372445	224163	370693	494218	452792	395359	405634	437609	MOUSE
Q9WVL3	Solute carrier family 12 member 7 (Electroneutral potassium-chloride cotransporter 4) (K-Cl cotransporter 4)	Slc12a7	1	1857	34831	2413.73	66746.7	28286.1	53504.4	40697.2	17301.6	28250.5	30164.2	42650.7	32896.4	25287.2	32059.7	47775.7	26178.8	25531.3	3358.4	2249.53	MOUSE
A3KG93	Lysine-specific histone demethylase (EC 1.-.-.-)	Kdm1a	2	26021.2	26591.6	28576.8	46235.9	67746	37350.3	36253.3	25644.7	25614.7	32152.9	75660.2	48409.2	56532.3	38692.4	59898.2	79219.4	44447.6	45275.8	64032.8	MOUSE
Q3UM18	Large subunit GTPase 1 homolog (EC 3.6.1.-)	Lsg1	4	88495.9	85931.9	120299	141418	83848.4	55901.1	71993.2	90221.2	119032	107475	121176	108970	110469	100492	148142	127058	103183	133810	134200	MOUSE
Q9JHF5	V-type proton ATPase subunit a	Tcirg1	3	94813.5	133690	133723	171451	148492	118969	116567	144962	156155	160270	210525	150466	85537.7	79804.5	158594	123656	158794	158700	101160	MOUSE
A0A1B0GSU0	Aldehyde dehydrogenase family 16 member A1	Aldh16a1	8	223417	210296	252453	339433	294836	203103	284189	243612	192603	194888	236309	272137	242046	238947	252069	256749	291746	337849	329650	MOUSE
Q60668	Heterogeneous nuclear ribonucleoprotein D0 (hnRNP D0) (AU-rich element RNA-binding protein 1)	Hnrnpd	9	803520	684822	878331	1.05146e+06	977368	895818	974033	816422	777778	922204	1.07074e+06	994212	1028993	828525	1.27216e+06	1.18605e+06	1.05652e+06	1.12192e+06	1.1587e+06	MOUSE
Q8BQM4	HEAT repeat-containing protein 3	Heatr3	5	141701	89679.9	162335	198652	140314	65865.3	110593	126459	135505	103660	171037	171728	156345	146660	147367	256766	193834	239531	257665	MOUSE
Q8BLN5	Lanosterol synthase (EC 5.4.99.7) (2,3-epoxysqualene--lanosterol cyclase) (Oxidosqualene--lanosterol cyclase) (OSC)	Lss	4	120416	90513.7	106298	183388	154753	127582	127346	129039	116278	129632	178062	181623	136625	180885	199952	135943	85760.1	114795	121337	MOUSE
P46978	Dolichyl-diphosphooligosaccharide--protein glycosyltransferase subunit STT3A (Oligosaccharyl transferase subunit STT3A) (STT3-A) (EC 2.4.99.18) (B5) (Integral membrane protein 1)	Stt3a	8	770646	735190	917940	1.10975e+06	296210	391382	374709	629431	744117	969489	1.06758e+06	293601	448042	540330	382735	294050	362773	465196	289563	MOUSE
Q64437	All-trans-retinol dehydrogenase [NAD(+)] ADH7 (EC 1.1.1.105) (ADH-C2) (Alcohol dehydrogenase 7) (Alcohol dehydrogenase class 4 mu/sigma chain) (EC 1.1.1.1) (Alcohol dehydrogenase class IV mu/sigma chain) (Gastric alcohol dehydrogenase) (Omega-hydroxydecanoate dehydrogenase ADH7) (EC 1.1.1.66) (Retinol dehydrogenase)	Adh7	8	552676	448927	673738	586763	1.07373e+06	1.12037e+06	1.02056e+06	693565	650134	712008	819220	764249	511694	632571	900799	468343	555018	683955	677354	MOUSE
Q99LS3	Phosphoserine phosphatase (PSP) (PSPase) (EC 3.1.3.3) (O-phosphoserine phosphohydrolase)	Psph	6	549837	565533	697708	931077	674333	690770	511258	842018	785356	859197	1.07421e+06	628580	553006	206379	719269	580857	442425	614422	284771	MOUSE
Q0PD20	Rab34 (Ras-related protein Rab-34)	Rab34	4	186334	154210	133063	200999	101213	90223.1	101526	118903	117027	145208	181268	84710	126308	104528	112026	111353	110828	172229	83950.6	MOUSE
Q9WVE8	Protein kinase C and casein kinase substrate in neurons protein 2 (Syndapin-2) (Syndapin-II) (SdpII)	Pacsin2	9	625432	612074	704089	746774	796462	882901	798876	576365	570060	639676	730372	595712	562522	568636	715999	670970	691810	738860	720617	MOUSE
Q8CAY6	Acetyl-CoA acetyltransferase, cytosolic (EC 2.3.1.9) (Cytosolic acetoacetyl-CoA thiolase)	Acat2	8	582945	550221	655978	541683	822276	808146	796384	798546	713438	790919	1.06839e+06	860877	776805	710223	997195	696252	779235	352514	791681	MOUSE
Q3TL72	NEDD8-activating enzyme E1 catalytic subunit (EC 6.2.1.64)	Uba3	5	159300	160977	189211	206306	242083	114840	208484	143657	140335	205272	212439	151967	186711	156954	203730	229174	175334	221742	267995	MOUSE
Q8C0C7	Phenylalanine--tRNA ligase alpha subunit (EC 6.1.1.20) (Phenylalanyl-tRNA synthetase alpha subunit) (PheRS)	Farsa	7	516810	273866	314651	431060	363980	388398	336728	402590	387509	370499	432460	256570	309765	250532	342942	357377	411350	460650	511919	MOUSE
Q6NZM8	3'-phosphoadenosine-5'-phosphosulfate synthase (EC 2.7.1.25) (EC 2.7.7.4) (APS kinase) (ATP-sulfurylase) (Adenosine-5'-phosphosulfate 3'-phosphotransferase) (Adenylyl-sulfate kinase) (Adenylylsulfate 3'-phosphotransferase) (Sulfate adenylate transferase) (Sulfate adenylyltransferase)	Papss1	6	257300	237312	329145	415576	281272	365372	377581	252962	317499	322844	380190	210158	282238	269572	383449	292698	278005	430722	329306	MOUSE
P27046	Alpha-mannosidase 2 (EC 3.2.1.114) (Golgi alpha-mannosidase II) (AMan II) (Man II) (Mannosidase alpha class 2A member 1) (Mannosyl-oligosaccharide 1,3-1,6-alpha-mannosidase)	Man2a1	7	213010	172900	289454	290509	179082	198210	196550	194891	189296	203799	284194	265136	268274	297498	301262	234865	180756	243555	233776	MOUSE
P53395	Lipoamide acyltransferase component of branched-chain alpha-keto acid dehydrogenase complex, mitochondrial (EC 2.3.1.168) (Branched-chain alpha-keto acid dehydrogenase complex component E2) (BCKAD-E2) (BCKADE2) (Dihydrolipoamide acetyltransferase component of branched-chain alpha-keto acid dehydrogenase complex) (Dihydrolipoamide branched chain transacylase) (Dihydrolipoyllysine-residue (2-methyl…	Dbt	5	255839	207856	288711	345517	196899	111859	168954	260549	219374	329168	360610	338191	291267	316422	294772	328842	268512	278104	324364	MOUSE
P47754	F-actin-capping protein subunit alpha-2 (CapZ alpha-2)	Capza2	6	413893	360794	464390	460885	865082	753471	695279	474026	431889	350407	588261	698351	589400	577654	730168	643128	504891	649588	724294	MOUSE
H7BWY4	Disks large homolog 1	Dlg1	5	86165.8	69899.4	114369	115829	95883.4	110437	103202	76500.8	97639	103038	128689	74444.7	108862	76131.5	113136	109988	96109.4	111244	103398	MOUSE
Q9CZE3	Ras-related protein Rab-32	Rab32	4	120138	118307	82079.9	172041	88553.5	128226	117204	109331	141341	113143	124694	131664	126322	121061	138623	123451	118900	157950	134318	MOUSE
O35295	Transcriptional activator protein Pur-beta (Purine-rich element-binding protein B) (Vascular actin single-stranded DNA-binding factor 2 p44 component)	Purb	4	136039	90090.8	132340	143454	205995	137252	138979	115170	114811	130684	139278	187031	142451	106000	190099	154426	139527	173397	162612	MOUSE
Q6ZPU9	KIF-binding protein (KIF1-binding protein)	Kifbp	3	92931.9	28259.1	67206.6	45089.7	36516.1	41082.4	88377.3	26744.2	30912.8	123354	103505	40673.1	42303.5	44192.4	65729.9	51277	35494.5	55373.8	44920.7	MOUSE
Q9D554	Splicing factor 3A subunit 3 (SF3a60) (Spliceosome-associated protein 61) (SAP 61)	Sf3a3	6	360282	342947	392313	450505	550102	534385	457546	394702	372437	439666	472215	513380	474911	448880	579385	643062	485870	551126	592600	MOUSE
Q8VHE0	Translocation protein SEC63 homolog	Sec63	3	113868	108994	132916	173481	16021.9	24411	37405.5	99865.5	109114	138906	135985	22780.2	59776.5	75257.8	46407.6	24408.2	51997.3	88359.3	41560.7	MOUSE
Q3TZZ7	Extended synaptotagmin-2 (E-Syt2)	Esyt2	6	238218	228895	229818	345564	85033.1	132525	167193	227054	133706	221550	274228	94964.3	90551.5	119456	117294	132424	121366	155529	118865	MOUSE
P47199	Quinone oxidoreductase (EC 1.6.5.5) (NADPH:quinone reductase) (Zeta-crystallin)	Cryz	4	92984.3	33878.4	108742	132023	211417	188636	131789	123509	116867	138620	155569	103994	114851	95275.4	115423	99432.7	102358	124160	117789	MOUSE
A0A5H1ZRL7	Transformation-related protein 53-binding protein 1	Trp53bp1	4	42626.5	22517.1	23692.3	46682.4	44828.5	52540.8	49908.3	27259.5	38424.9	26839	23765.4	57363	63022	76593.1	76403.4	90252.9	45671.9	68162.5	64589.6	MOUSE
P10518	Delta-aminolevulinic acid dehydratase (ALADH) (EC 4.2.1.24) (Porphobilinogen synthase)	Alad	12	634395	578371	729980	853543	1.67857e+06	1.26637e+06	1.44306e+06	715670	722580	783739	899485	802807	758553	590036	889565	707817	685259	860199	930361	MOUSE
Q8CC88	von Willebrand factor A domain-containing protein 8	Vwa8	4	55415.5	632620	61550.7	171395	86799.3	87518.2	167719	61227.2	70604.9	899286	119223	80356.5	55314.1	83217.4	111800	1057328	63200.9	853961	78197.8	MOUSE
Q3UZ39	Leucine-rich repeat flightless-interacting protein 1 (LRR FLII-interacting protein 1) (FLI-LRR-associated protein 1) (Flap-1) (H186 FLAP)	Lrrfip1	4	95203.7	86423.5	97128.8	107426	137035	166969	151102	109047	113731	110084	102131	94958.2	107493	80163.3	97005.9	93499.2	94320.3	107665	117234	MOUSE
Q6P2B1	Transportin-3	Tnpo3	3	67272	88918.9	391899	113302	512188	102571	438748	75546.5	372499	100007	516095	114128	383576	379618	122101	84857.3	341259	123605	146706	MOUSE
Q6PGB6	N-alpha-acetyltransferase 50 (EC 2.3.1.258) (N-acetyltransferase NAT13) (N-epsilon-acetyltransferase 50) (EC 2.3.1.-) (NatE catalytic subunit)	Naa50	5	75814.1	70258.2	90639	126177	77470.3	82559.6	82641.6	81550.2	126314	104018	112810	97693.2	96245.4	108282	116650	99053.3	94202.2	103964	120032	MOUSE
A0A140LHA2	Mitotic checkpoint protein BUB3	Bub3	9	721624	708344	903827	972182	929560	899342	914290	792414	784675	898369	950388	842648	962041	802806	1.14576e+06	1.1203e+06	903091	1.13212e+06	1.16907e+06	MOUSE
Q9WTP6	Adenylate kinase 2, mitochondrial (AK 2) (EC 2.7.4.3) (ATP-AMP transphosphorylase 2) (ATP:AMP phosphotransferase) (Adenylate monophosphate kinase)	Ak2	10	1.01016e+06	958954	1.16426e+06	1.28023e+06	1.41198e+06	1.31488e+06	1299451	1.21462e+06	1.17707e+06	1.29325e+06	1.45061e+06	1.60947e+06	1.39416e+06	1.42348e+06	1.83494e+06	2.05554e+06	1.61559e+06	1.69066e+06	1.70952e+06	MOUSE
Q3TN34	MICAL-like protein 2 (Junctional Rab13-binding protein) (Molecule interacting with CasL-like 2) (MICAL-L2)	Micall2	3	30537.5	34217.3	45566.8	37898.6	26747.9	39110.3	39469.8	38936.2	45445.1	35930.9	41558.7	45655.9	37638.7	31985.1	46197.3	35366.6	38655.2	49194.8	37334.1	MOUSE
Q14C51	Pentatricopeptide repeat domain-containing protein 3, mitochondrial (28S ribosomal protein S39, mitochondrial) (MRP-S39)	Ptcd3	9	272922	199301	297293	294871	322408	281294	269416	264562	280204	196171	413024	374800	258911	271353	365914	221133	229534	138322	268205	MOUSE
Q64010	Adapter molecule crk (Proto-oncogene c-Crk) (p38)	Crk	1	29710.7	27998.6	33985.6	51023.5	38281.4	29598.1	31805.9	32261.8	25130.3	27029.4	45073	35386.5	29801.1	33870.8	32428	28591.3	25110.7	34759.8	35348.6	MOUSE
Q9D706	RNA polymerase II-associated protein 3	Rpap3	6	123697	121211	135824	186049	107679	166403	134946	134152	154040	150646	184359	144967	149639	129666	179270	162740	135932	208346	190060	MOUSE
P30285	Cyclin-dependent kinase 4 (EC 2.7.11.22) (CRK3) (Cell division protein kinase 4) (PSK-J3)	Cdk4	8	289454	235636	353486	331721	540828	415071	376709	294276	313677	296263	430344	412702	329905	360788	414398	428217	354931	477841	405853	MOUSE
Q9DC61	Mitochondrial-processing peptidase subunit alpha (Alpha-MPP) (Inactive zinc metalloprotease alpha) (P-55)	Pmpca	5	198656	172742	225552	265180	256125	217684	235103	217087	210768	245991	271964	390560	317294	329716	440227	293736	257447	245719	270944	MOUSE
Q5SUH7	Clathrin interactor 1	Clint1	9	248329	233082	318931	371404	342987	312171	348175	221286	241029	230043	324254	313294	304571	268924	429299	364292	333308	421234	431908	MOUSE
A2AWT5	Nucleolar transcription factor 1	Ubtf	5	236470	221746	241213	187923	233191	306331	172061	219095	163247	217159	222506	228705	243583	212503	245032	313534	219838	229611	248227	MOUSE
A0A2R8VHQ0	Tensin-2	Tns2	4	77891	68042.5	453414	142360	117484	478016	111851	79786	459299	44552.5	608496	573992	593282	567266	761451	102394	116470	96947.4	124010	MOUSE
F8WHZ9	Alpha-adducin	Add1	4	105878	54344	99272.7	116018	206508	162447	170845	65549.7	50735.5	108993	91054	99778.8	89430.4	77794.5	110277	131983	107711	153612	128899	MOUSE
Q9CY64	Biliverdin reductase A (BVR A) (EC 1.3.1.24) (Biliverdin-IX alpha-reductase)	Blvra	6	181390	216461	215357	255723	275186	371677	244907	200328	232093	219084	265603	291763	288387	222999	311979	280238	244065	271358	320048	MOUSE
Q8VD75	Huntingtin-interacting protein 1 (HIP-1) (Huntingtin-interacting protein I) (HIP-I)	Hip1	2	22682.4	29871.7	44120.4	13017.5	44714.4	4997.2	23242.1	15490	26505.6	20495.2	34397.7	61552.8	41437	47293.1	45295	69550.1	38397.2	65318.4	57732.2	MOUSE
P17742	Peptidyl-prolyl cis-trans isomerase A (PPIase A) (EC 5.2.1.8) (Cyclophilin A) (Cyclosporin A-binding protein) (Rotamase A) (SP18) [Cleaved into: Peptidyl-prolyl cis-trans isomerase A, N-terminally processed]	Ppia	9	20237000	19354702	23645082	28457296	28502080	28920078	23362410	22119898	21667704	21936386	26252612	24184014	21169216	20067462	26162590	23147276	20245496	25102838	26937774	MOUSE
Q8JZQ2	AFG3-like protein 2 (EC 3.4.24.-)	Afg3l2	4	87895	79387	104361	142407	87565.2	59091.7	76627	117972	112963	126203	156129	100856	74359.5	79881.9	90829	62515.1	51960.6	161882	91707.5	MOUSE
O08749	Dihydrolipoyl dehydrogenase, mitochondrial (EC 1.8.1.4) (Dihydrolipoamide dehydrogenase)	Dld	6	833908	654254	865121	1.03221e+06	1.07214e+06	927623	875850	822481	693931	858619	1.037e+06	1.05154e+06	839250	923363	1.14454e+06	1.05206e+06	786737	850011	912498	MOUSE
Q61550	Double-strand-break repair protein rad21 homolog (mHR21) (Pokeweed agglutinin-binding protein 29) (PW29) (SCC1 homolog) [Cleaved into: 64-kDa C-terminal product (64-kDa carboxy-terminal product)]	Rad21	5	93584	46969.8	139829	183532	200225	148683	128961	127064	109771	107784	131734	144561	117931	140329	195620	176907	153009	201193	188521	MOUSE
Q9R0L6	Pericentriolar material 1 protein (PCM-1) (mPCM-1)	Pcm1	2	23938.2	111492	20834.7	45174.4	59361.8	56375.3	27215.7	56963.6	69270.3	79084.8	32128.3	41645	57594	36666.8	93408.2	57676.7	47503.3	54686.4	62288.5	MOUSE
A0A0R4J1W7	Cell division cycle protein 23 homolog	Cdc23	4	78898.4	62173.5	76645.2	117252	94765.9	92005.7	74503.9	79295	71549.3	63394.7	89895	96661.9	90609.4	88186.2	116606	98654.5	88492.5	111277	101819	MOUSE
Q99PT1	Rho GDP-dissociation inhibitor 1 (Rho GDI 1) (GDI-1) (Rho-GDI alpha)	Arhgdia	8	1.81399e+06	1778507	2.20094e+06	2473003	3.21957e+06	3.50988e+06	3.08735e+06	1934673	1.92076e+06	2078484	2.22949e+06	2.22896e+06	2.0341e+06	1.86433e+06	2365889	2.24906e+06	2.23295e+06	2.7044e+06	2.84155e+06	MOUSE
G5E8R4	Serine/threonine-protein phosphatase 6 regulatory subunit 3	Ppp6r3	3	24635.4	27374.3	34839	25875.7	41336.4	26849.8	25280.1	40544.8	23690.6	19746.4	34951.4	25776.9	27432.6	24280.7	34793.9	28474.3	30379.8	62465.1	36927.2	MOUSE
Q8BX10	Serine/threonine-protein phosphatase PGAM5, mitochondrial (EC 3.1.3.16) (Phosphoglycerate mutase family member 5)	Pgam5	4	112054	206625	227609	252395	167303	190735	103548	108137	131164	168889	140811	216343	245349	198032	274331	329800	332177	269451	288337	MOUSE
A2BE93	Protein SET (Fragment)	Set	8	2070687	1.95063e+06	2.39349e+06	2.76192e+06	2.67927e+06	2.70562e+06	2.64857e+06	2.34644e+06	2340820	2.57059e+06	2.92134e+06	2.76872e+06	2.8361e+06	2.67066e+06	3.48778e+06	2.60313e+06	2358374	2883324	2821348	MOUSE
Q8K2T8	RNA polymerase II-associated factor 1 homolog	Paf1	3	54178.2	26472.8	41307.3	74547.5	98435.8	58766.6	84675.5	68741	38389.4	74721.1	92645.4	70456.4	76331.3	73353.4	120343	122143	91279.2	99700.6	111242	MOUSE
Q8BP48	Methionine aminopeptidase 1 (MAP 1) (MetAP 1) (EC 3.4.11.18) (Peptidase M 1)	Metap1	4	194810	202457	232581	317668	308159	318684	314948	260021	242411	296609	334791	262372	237792	274968	296039	289426	241218	296505	312759	MOUSE
P57759	Endoplasmic reticulum resident protein 29 (ERp29)	Erp29	8	531320	505439	630750	860949	892135	664231	656698	524501	497318	605837	746234	1.07673e+06	868514	918896	1.16452e+06	973404	701472	840116	965088	MOUSE
Q9D287	Pre-mRNA-splicing factor SPF27 (Breast carcinoma-amplified sequence 2 homolog) (DNA amplified in mammary carcinoma 1 protein)	Bcas2	5	157131	153606	121507	219659	171770	223745	185340	138647	175418	168400	145270	241791	230302	202333	275617	298541	240603	244891	251497	MOUSE
A0A5F8MPZ2	Kinesin light chain	Klc1	4	114356	70404.9	118600	176960	99020.1	131769	116965	93871.7	76484.5	65429.8	161261	139392	115545	130091	159236	148826	65763.3	52646.8	76518.1	MOUSE
Q3UVL4	Vacuolar protein sorting-associated protein 51 homolog (Protein fat-free homolog)	Vps51	3	466501	434023	468224	519586	321093	109737	533016	341692	486206	458857	674796	87733.9	376637	526740	503637	98470.7	365606	578629	111291	MOUSE
A0A5F8MP95	Ubiquitin conjugation factor E4 B	Ube4b	4	83248.3	72634.5	108527	126729	73060.3	54787.7	89441.8	66362.3	86412.7	87376.7	96093.8	49640.4	85679.2	59604.5	89529.5	82652.1	88690.9	110012	91115.5	MOUSE
P62827	GTP-binding nuclear protein Ran (GTPase Ran) (Ras-like protein TC4) (Ras-related nuclear protein)	Ran	7	2.4733e+06	2483642	2898319	3646740	3010639	3105708	2.66602e+06	2497119	2.61161e+06	2.78254e+06	3.12512e+06	3207015	3.15099e+06	2.9597e+06	3.76128e+06	3.3448e+06	3.0323e+06	4.08653e+06	4.10516e+06	MOUSE
Q9D071	MMS19 nucleotide excision repair protein homolog (MET18 homolog) (MMS19-like protein)	Mms19	4	138041	131261	176648	202403	167392	217975	226391	153845	167107	193952	198729	89827.5	176981	128935	230011	159196	203041	273939	285703	MOUSE
K3W4P2	Integrator complex subunit 1	Ints1	1	41407.1	45482.9	67054.8	71222.2	44888.7	37595.7	47312.9	58026.2	61704.9	66455.7	90576.3	61168.2	57394	67567.4	68748.2	55332.7	47417.5	44011.4	48542.1	MOUSE
Q9Z2U1	Proteasome subunit alpha type-5 (Macropain zeta chain) (Multicatalytic endopeptidase complex zeta chain) (Proteasome zeta chain)	Psma5	9	1242101	1.23171e+06	1.50443e+06	1.76651e+06	1655254	1.56902e+06	1.51033e+06	1.41948e+06	1.4812e+06	1.55413e+06	1.76285e+06	1.53664e+06	1.48455e+06	1.35197e+06	1.80332e+06	1.89559e+06	1.66479e+06	2.04327e+06	2.14504e+06	MOUSE
Q61074	Protein phosphatase 1G (EC 3.1.3.16) (Fibroblast growth factor-inducible protein 13) (FIN13) (Protein phosphatase 1C) (Protein phosphatase 2C isoform gamma) (PP2C-gamma) (Protein phosphatase magnesium-dependent 1 gamma)	Ppm1g	9	360597	354195	418513	518172	405188	450007	317212	363688	359296	384005	408074	491696	469609	366618	584425	608949	560418	655765	693991	MOUSE
Q921W7	Testin	Tes	5	144159	127311	155214	187493	244848	287849	245677	144052	167149	149134	183130	193485	222556	166040	229973	140652	148591	181246	185555	MOUSE
Q61792	LIM and SH3 domain protein 1 (LASP-1) (Metastatic lymph node gene 50 protein) (MLN 50)	Lasp1	6	658403	682724	775218	926814	747127	857922	706840	632956	719837	744946	775994	652729	686999	585443	796766	628807	606368	742924	760013	MOUSE
Q9CQF3	Cleavage and polyadenylation specificity factor subunit 5 (Nucleoside diphosphate-linked moiety X motif 21) (Nudix motif 21) (Nudix hydrolase 21)	Nudt21	4	290988	296386	325166	418255	470993	445329	384679	337904	322326	356909	416230	424873	393828	380809	504742	574505	444084	476442	515601	MOUSE
Q9CZW5	Mitochondrial import receptor subunit TOM70 (Mitochondrial precursor proteins import receptor) (Translocase of outer membrane 70 kDa subunit) (Translocase of outer mitochondrial membrane protein 70)	Tomm70	2	197164	174802	188663	277457	153583	150058	127960	199823	217685	247404	287353	213208	148809	183524	185278	197054	168559	114843	164739	MOUSE
Q9DCS3	Enoyl-[acyl-carrier-protein] reductase, mitochondrial (EC 1.3.1.104) (2-enoyl thioester reductase) (Nuclear receptor-binding factor 1) (NRBF-1)	Mecr	6	229261	152547	240480	260171	317014	203296	263781	209594	225316	281774	294528	247408	251878	262110	319158	344184	269219	266145	294358	MOUSE
Q9CZ04	COP9 signalosome complex subunit 7a (SGN7a) (Signalosome subunit 7a) (JAB1-containing signalosome subunit 7a)	Cops7a	9	276180	274785	324835	386370	426399	355640	376791	242258	269518	302542	363281	352734	343629	343617	386181	412248	380433	433189	450172	MOUSE
P12265	Beta-glucuronidase (EC 3.2.1.31)	Gusb	7	205597	156775	225582	315985	197637	248089	261263	291749	205357	268670	256282	351567	356661	327030	446217	356912	344294	397391	400716	MOUSE
Q9Z204	Heterogeneous nuclear ribonucleoproteins C1/C2 (hnRNP C1/C2)	Hnrnpc	3	93277.5	108254	103001	161399	399966	174902	204388	123967	114126	124091	157049	139487	237400	208457	150959	143889	147665	222328	171791	MOUSE
Q80U72	Protein scribble homolog (Scribble) (Protein LAP4)	Scrib	5	194298	95042.9	262206	291206	92096.8	104959	192062	184182	106747	126452	280707	133077	294926	246775	315220	196010	317176	317275	303829	MOUSE
D3YX27	Serine protease HTRA2, mitochondrial	Htra2	7	282012	212893	276205	363141	511641	415691	352466	335165	302172	364390	406986	545114	446049	467962	604748	732683	536937	546725	528345	MOUSE
P08074	Carbonyl reductase [NADPH] 2 (EC 1.1.1.184) (Adipocyte protein P27) (AP27) (Lung carbonyl reductase) (LCR) (NADPH-dependent carbonyl reductase 2)	Cbr2	7	1126597	841481	1.25553e+06	1.33791e+06	2.05266e+06	1.53245e+06	1.80006e+06	886356	764873	1.06349e+06	1.15941e+06	1623234	1.54236e+06	1.47038e+06	1.89731e+06	2189579	1.79806e+06	1.89635e+06	2.00405e+06	MOUSE
Q80XR5	U2 snRNP auxiliary factor large subunit	U2af2	9	709759	567505	816733	1.01781e+06	828082	636144	859472	748012	762687	856723	923944	830606	786622	763689	898571	1.16527e+06	948693	1.0141e+06	1.01207e+06	MOUSE
P70122	Ribosome maturation protein SBDS (Protein 22A3) (Shwachman-Bodian-Diamond syndrome protein homolog)	Sbds	1	69722.5	66176.1	84076	99320.5	57734.7	99426.6	54157.7	53912.8	66497.7	68170.7	85454.2	25927.2	23364.8	32060.7	74627.6	61706.9	10480.7	16038.9	11234.8	MOUSE
Q99JF8	PC4 and SFRS1-interacting protein (Lens epithelium-derived growth factor) (mLEDGF)	Psip1	7	230789	189212	273596	299700	259550	243265	310992	192458	189346	249561	244974	118470	191463	154204	194892	195161	178095	217875	201652	MOUSE
P21279	Guanine nucleotide-binding protein G(q) subunit alpha (Guanine nucleotide-binding protein alpha-q)	Gnaq	4	80193.6	63276.4	76449.9	128692	91786.2	66700.4	120542	65538	48849.1	73573.5	88647.5	81724.6	68378.4	94078.9	92948.1	91380.5	92742.3	90327.2	48630.2	MOUSE
Q8K0C9	GDP-mannose 4,6 dehydratase (EC 4.2.1.47) (GDP-D-mannose dehydratase) (GMD)	Gmds	6	285540	281929	335081	410197	397824	397967	348116	294645	330580	345498	444122	380764	397671	342256	448669	383004	375991	472263	456047	MOUSE
F8VPK0	Tetratricopeptide repeat domain 37	Ttc37	5	69920.9	56787.3	66786.1	106034	71711.8	60493.3	80389.3	66289.7	81414.6	82596.6	96614.6	74205.6	58254.3	66793.4	107840	69872.3	57468	103779	113750	MOUSE
E9QM38	Solute carrier family 12 member 2	Slc12a2	3	130371	66577.2	111800	171649	150042	125226	142229	122948	109388	79780.6	135504	138968	107429	61256.5	115964	118035	101980	145031	110687	MOUSE
Q91V61	Sideroflexin-3	Sfxn3	7	502372	347139	520405	644880	1146653	935422	875676	444411	381995	513670	587278	713329	628323	601689	802994	899695	644607	678748	742534	MOUSE
Q9R1P0	Proteasome subunit alpha type-4 (Macropain subunit C9) (Multicatalytic endopeptidase complex subunit C9) (Proteasome component C9) (Proteasome subunit L)	Psma4	11	1.50613e+06	1.39987e+06	1.74046e+06	1.95349e+06	2.01743e+06	2.05137e+06	1.74348e+06	1.57882e+06	1.6371e+06	1.66843e+06	1.89411e+06	1.97972e+06	1.86498e+06	1.70792e+06	2.28773e+06	2179399	1.92031e+06	2.38511e+06	2.42218e+06	MOUSE
Q3UQ84	Threonine--tRNA ligase, mitochondrial (EC 6.1.1.3) (Threonyl-tRNA synthetase) (ThrRS) (Threonyl-tRNA synthetase-like 1)	Tars2	4	77142.2	47596.9	128744	100116	60414.2	61407.9	69826.7	131329	81243.5	95491.3	160012	86612.7	77328.2	81193.3	111504	67413.4	79213.8	85100.1	70987.3	MOUSE
O70435	Proteasome subunit alpha type-3 (Macropain subunit C8) (Multicatalytic endopeptidase complex subunit C8) (Proteasome component C8) (Proteasome subunit K)	Psma3	6	1.10038e+06	1.10054e+06	1.40003e+06	1.67419e+06	1.4747e+06	1.6123e+06	1.37175e+06	1.22424e+06	1229196	1.33618e+06	1.552e+06	1.48553e+06	1.37446e+06	1.28349e+06	1.77117e+06	1.57661e+06	1495611	1.80788e+06	1.98658e+06	MOUSE
Q9CYR6	Phosphoacetylglucosamine mutase (PAGM) (EC 5.4.2.3) (Acetylglucosamine phosphomutase) (N-acetylglucosamine-phosphate mutase) (Phosphoglucomutase-3) (PGM 3)	Pgm3	6	115068	107024	112675	160084	184269	181238	146789	112728	115129	90292.7	108096	157359	151587	98435.2	173762	137527	129713	203054	177888	MOUSE
Q9CXW2	28S ribosomal protein S22, mitochondrial (MRP-S22) (S22mt)	Mrps22	2	58824.4	52727.7	69346.6	100799	92207.5	85682.9	70568.2	72093.2	71288.4	80659.4	87482.7	102823	81440	99419.5	110378	82533.9	59871.9	77747.8	88528.7	MOUSE
Q8BK72	28S ribosomal protein S27, mitochondrial (MRP-S27) (S27mt) (Mitochondrial ribosomal protein S27)	Mrps27	3	73993.2	47545.2	55818.4	96487.3	122369	65801.8	61509.9	63936.1	64654.7	81016.2	99957.6	103727	80961.1	108579	129238	97174.5	66828.9	61762.6	92015.8	MOUSE
A0A498WGD8	Thioredoxin-like protein 1	Txnl1	8	608010	574334	674819	813791	900688	847093	750701	600467	630085	581980	721738	747183	651904	536708	782536	796636	673093	834959	883946	MOUSE
Q99ME2	WD repeat-containing protein 6 (mWDR6)	Wdr6	5	46898.2	58684	60608.1	94887.6	85007.7	68635.1	85176.4	53411.3	59741.9	48799.1	72738.8	59459.7	63548.1	70678.4	84335.8	66461.6	48111.1	78543.7	83077.6	MOUSE
P62737	Actin, aortic smooth muscle (Alpha-actin-2) [Cleaved into: Actin, aortic smooth muscle, intermediate form]	Acta2	8	11280477	11929527	16765712	18932436	12852950	7.57609e+06	12892138	14172928	9126141	11888017	12353742	14194962	11043644	9918775	16459446	9977530	8595820	3.50436e+06	8280109	MOUSE
P17918	Proliferating cell nuclear antigen (PCNA) (Cyclin)	Pcna	8	1.1733e+06	1.17638e+06	1.38313e+06	1.73586e+06	1.98525e+06	1.5608e+06	1697567	1.30047e+06	1.34571e+06	1.39634e+06	1.56877e+06	1.91922e+06	1.70385e+06	1.64046e+06	2.09262e+06	2.18784e+06	1.80344e+06	2118168	2216920	MOUSE
Q9R0P5	Destrin (Actin-depolymerizing factor) (ADF) (Sid 23)	Dstn	6	1.10304e+06	1.0838e+06	1.39301e+06	1.55808e+06	1.02228e+06	1.01341e+06	984996	1.2512e+06	1.28582e+06	1.36226e+06	1.59974e+06	1.2918e+06	1.21238e+06	1.09254e+06	1.46466e+06	898127	880968	992447	1.03492e+06	MOUSE
E9PUW7	Exportin-7	Xpo7	1	3947.49	8401.47	13223.9	7659.6	15020.1	12933.2	11695.6	8873.45	3944.66	2494.76	13981.2	16935.6	10335.8	3282.4	15550.8	2350.49	3435.77	10909.1	23046.8	MOUSE
Q91VH2	Sorting nexin-9	Snx9	7	282782	241347	334099	367967	425141	378119	320116	265192	251704	281147	340858	330066	242972	277397	357665	368893	315307	409710	398456	MOUSE
O54692	Centromere/kinetochore protein zw10 homolog	Zw10	1	2470.69	2699.36	10743.4	9533.93	3501.42	14463.6	14819.1	4495.35	13392.3	20101.5	4477.9	18206.5	17358.6	10279	8593.2	2931.37	1767.47	28115.5	24822.8	MOUSE
O70433	Four and a half LIM domains protein 2 (FHL-2) (Skeletal muscle LIM-protein 3) (SLIM-3)	Fhl2	2	27695.9	10247.5	4714.08	50128.1	17211.3	38622.2	30920.6	5282.52	11534.5	53050.1	6835.84	27512.9	28667.4	10379.9	19228.5	6515.05	31663.6	12259.2	25353.1	MOUSE
P51150	Ras-related protein Rab-7a (EC 3.6.5.2)	Rab7a	8	1.65215e+06	1.45746e+06	1.66864e+06	2.20821e+06	1.74877e+06	1.9834e+06	1.90335e+06	1901802	1.79807e+06	2.14025e+06	2.48801e+06	1.64806e+06	1351851	1.50178e+06	1607521	1.48454e+06	1.27852e+06	1.51208e+06	1.07375e+06	MOUSE
Q9JIH2	Nuclear pore complex protein Nup50 (50 kDa nucleoporin) (Nuclear pore-associated protein 60 kDa-like) (Nucleoporin Nup50)	Nup50	2	80586.2	83620.5	111073	140372	119499	91993.5	119438	102240	103899	104964	119159	151182	118440	141056	181754	230340	174591	196182	205008	MOUSE
Q8BKE6	Cytochrome P450 20A1 (EC 1.14.-.-)	Cyp20a1	6	158309	157478	191293	179470	135285	169328	189829	179750	147703	202537	177219	170702	120471	141715	106355	182609	72136.5	204945	85725.8	MOUSE
P47791	Glutathione reductase, mitochondrial (GR) (GRase) (EC 1.8.1.7)	Gsr	6	239770	219318	204970	336351	337102	333926	316793	238861	265352	174904	336887	366289	352822	291907	425656	436796	383224	456145	482363	MOUSE
Z4YK42	NAD kinase 2, mitochondrial (EC 2.7.1.23) (NAD kinase domain-containing protein 1, mitochondrial)	Nadk2	3	52098.2	77252.9	86549.9	111359	84125.5	75519.5	70953.8	67060.4	36409	72756.7	75384.6	103252	79428.9	76101.4	111474	141467	113935	123436	126508	MOUSE
Q8CI59	Metalloreductase STEAP3 (EC 1.16.1.-) (Dudulin-2) (Protein nm1054) (Six-transmembrane epithelial antigen of prostate 3) (Tumor suppressor-activated pathway protein 6)	Steap3	2	78552.2	58099.4	73768.4	90368.6	144967	151232	72752.2	63859.9	45701	100158	95012.9	103150	92823.4	109324	108512	74050	101061	125296	152435	MOUSE
A0A1B0GRV0	3'(2'),5'-bisphosphate nucleotidase 1	Bpnt1	5	250517	224428	276142	319421	221372	272690	173044	227245	265828	253159	301935	259963	290859	191514	362259	207250	201155	282795	248242	MOUSE
G3UX26	Outer mitochondrial membrane protein porin 2 (Voltage-dependent anion-selective channel protein 2)	Vdac2	11	1.36517e+06	1.23956e+06	1.52932e+06	1.86882e+06	1.32445e+06	1.3827e+06	1.04339e+06	1.29508e+06	1.34211e+06	1.56761e+06	1.88873e+06	1.53531e+06	1.03892e+06	1.27031e+06	1.49307e+06	1.21254e+06	983671	1.06955e+06	1.01273e+06	MOUSE
Q3U9G9	Delta(14)-sterol reductase LBR (Delta-14-SR) (EC 1.3.1.70) (3-beta-hydroxysterol Delta (14)-reductase) (C-14 sterol reductase) (C14SR) (Integral nuclear envelope inner membrane protein) (Lamin-B receptor) (Sterol C14-reductase)	Lbr	3	120080	115699	128571	142457	37378.5	42765.6	26909.6	96254.7	101100	133154	115598	31805.1	35332.4	28222.1	62649.5	24723.5	30327.6	47686.2	26567.5	MOUSE
Q3UH60	Disco-interacting protein 2 homolog B (DIP2 homolog B)	Dip2b	1	88200	77644	9550.25	119181	112664	5062.55	112493	84584	3303.77	100990	12148.8	28466.6	99296.4	89112.6	117734	6096.08	3257.6	20017.4	142276	MOUSE
P26516	26S proteasome non-ATPase regulatory subunit 7 (26S proteasome regulatory subunit RPN8) (26S proteasome regulatory subunit S12) (Mov34 protein) (Proteasome subunit p40)	Psmd7	10	676849	639020	787056	960103	951434	804808	808800	693499	637940	647560	873834	901697	760872	757374	966419	1.10706e+06	878764	1.10318e+06	1140318	MOUSE
Q8BH95	Enoyl-CoA hydratase, mitochondrial (EC 4.2.1.17) (Enoyl-CoA hydratase 1) (Short-chain enoyl-CoA hydratase) (SCEH)	Echs1	6	381630	322345	545020	584370	788220	918949	702683	561195	535258	638030	520697	760992	672242	681650	717849	762041	487489	564642	665253	MOUSE
P47758	Signal recognition particle receptor subunit beta (SR-beta)	Srprb	6	260038	268531	290263	353004	98364.1	122876	115038	218212	273879	299432	352117	113459	131384	166490	122115	119794	123552	182404	91507.3	MOUSE
Q8BYL4	Tyrosine--tRNA ligase, mitochondrial (EC 6.1.1.1) (Tyrosyl-tRNA synthetase) (TyrRS)	Yars2	5	194822	183892	165950	254656	212468	203254	186142	181659	201661	279129	302297	274395	217704	274871	249591	204556	174647	218328	205888	MOUSE
P63037	DnaJ homolog subfamily A member 1 (DnaJ protein homolog 2) (Heat shock 40 kDa protein 4) (Heat shock protein J2) (HSJ-2)	Dnaja1	9	484608	422498	530205	573650	416571	413533	505675	353111	422416	449629	510226	457306	526394	435297	612069	502344	437609	566576	532166	MOUSE
Q9CX56	26S proteasome non-ATPase regulatory subunit 8 (26S proteasome regulatory subunit RPN12) (26S proteasome regulatory subunit S14)	Psmd8	4	341353	307157	410536	534098	619964	503415	469684	367942	387727	399088	481944	513687	453019	440594	624493	584454	460337	590227	644825	MOUSE
E9Q8K8	Zinc finger CCCH domain-containing protein 4	Zc3h4	4	25004.5	22299.1	32906.9	41752.3	41198.3	27950.2	31306.5	35548.1	29950.7	42924.1	44163.3	34819.9	43463.1	34504.5	43391.1	49701.4	49640.5	50667.5	51982.6	MOUSE
Q9D903	Probable rRNA-processing protein EBP2	Ebna1bp2	6	107683	95445.8	104429	125324	111698	144522	54741.8	109687	122085	136578	156544	121219	133794	98098.8	164127	165232	130703	136467	121109	MOUSE
Q9QXB9	Developmentally-regulated GTP-binding protein 2 (DRG-2) (Translation factor GTPase DRG2) (TRAFAC GTPase DRG2) (EC 3.6.5.-)	Drg2	6	353710	360221	347608	534689	293558	236248	317187	340422	354831	403546	468633	288004	297933	266844	407263	327475	401837	471646	430759	MOUSE
Q61166	Microtubule-associated protein RP/EB family member 1 (APC-binding protein EB1) (End-binding protein 1) (EB1)	Mapre1	8	440666	446967	479387	602477	526776	567150	514261	432373	440235	468422	513737	607747	616454	541354	681516	454428	468647	581294	596730	MOUSE
Q3TWV4	AP-2 complex subunit mu	Ap2m1	4	165905	84434	373138	330848	402097	215787	234116	194876	198604	325882	217627	230641	191696	182801	252471	209209	223091	459891	235435	MOUSE
P33610	DNA primase large subunit (DNA primase 58 kDa subunit) (p58)	Prim2	4	73259	42122.2	29078.9	53622.3	49796.4	97236	55975.9	60448.3	43280.7	54432.8	52709.6	25758.7	45715.6	67533.5	61546.9	104413	79900.4	106642	106765	MOUSE
Q9Z103	Activity-dependent neuroprotector homeobox protein (Activity-dependent neuroprotective protein)	Adnp	3	37145.2	30416	27509.5	46043.9	55271.9	50950.5	46247.7	21095.1	36457	35977.7	45480	60511.3	54157.8	53262.8	64305.8	71022.6	47097.5	63177.9	55065.5	MOUSE
Q8QZS1	3-hydroxyisobutyryl-CoA hydrolase, mitochondrial (EC 3.1.2.4) (3-hydroxyisobutyryl-coenzyme A hydrolase) (HIB-CoA hydrolase) (HIBYL-CoA-H)	Hibch	3	55961.4	80698.6	79600.2	62167	96567.3	80342.2	76176.1	97973.5	87436.9	94869.9	99585	81354.7	89778.6	75583.1	121151	122296	127130	105210	144587	MOUSE
Q8C7V3	U3 small nucleolar RNA-associated protein 15 homolog (Src-associated protein SAW)	Utp15	5	104004	64246.6	90602.1	97867	92456.6	104470	87197.4	108115	119324	115274	169139	127002	103534	115321	136826	132054	95919.2	116736	116218	MOUSE
P62806	Histone H4	H4c1;H4c2;H4c3;H4c4;H4c6;H4c8;H4c9;H4c11;H4c12;Hist1h4m;H4c14;H4f16	6	13203652	12019271	14113406	16063525	13673525	14076683	3.10002e+06	12839509	12565303	14192171	15795985	16860700	9694053	10731054	13360181	12523888	5244890	6375288	13411265	MOUSE
O35226	26S proteasome non-ATPase regulatory subunit 4 (26S proteasome regulatory subunit RPN10) (26S proteasome regulatory subunit S5A) (Multiubiquitin chain-binding protein)	Psmd4	4	267892	261772	308995	404840	364717	413237	325168	306622	286360	312271	365376	290297	292041	258873	350717	335995	281693	336906	370963	MOUSE
Q5F258	ARF GTPase-activating protein GIT1	Git1	3	46293.4	49074	65036.9	80163.1	110492	71918.7	75718.2	64987.8	56072.5	63148.7	97427.9	74896.2	64860	71622.5	85128.8	91767.9	65918.5	94733.1	100545	MOUSE
Q99KV1	DnaJ homolog subfamily B member 11 (APOBEC1-binding protein 2) (ABBP-2) (ER-associated DNAJ) (ER-associated Hsp40 co-chaperone) (Endoplasmic reticulum DNA J domain-containing protein 3) (ER-resident protein ERdj3) (ERdj3) (ERj3p)	Dnajb11	6	348102	336763	374550	432535	301322	378885	298372	303293	282655	326442	376452	309605	332773	299679	420211	436142	381445	401100	426673	MOUSE
P54731	FAS-associated factor 1	Faf1	4	89520.4	64160	99875.9	141280	125643	102726	95887.4	96149.6	98759	131338	118965	110451	92495.7	98310.9	129107	83923.7	94848.5	124486	111069	MOUSE
Q91WD5	NADH dehydrogenase [ubiquinone] iron-sulfur protein 2, mitochondrial (EC 7.1.1.2) (Complex I-49kD) (CI-49kD) (NADH-ubiquinone oxidoreductase 49 kDa subunit)	Ndufs2	3	108954	59176.2	99383.8	109382	211167	154799	129637	108936	85876.1	104532	123736	145651	106645	109442	142389	174035	132294	150543	177428	MOUSE
F8VPN4	4-alpha-glucanotransferase (EC 2.4.1.25) (EC 3.2.1.33) (Amylo-alpha-1,6-glucosidase) (Dextrin 6-alpha-D-glucosidase) (Glycogen debrancher) (Glycogen debranching enzyme) (Oligo-1,4-1,4-glucantransferase)	Agl	3	46315.1	41901.7	50647.3	60613	79986.8	55714.6	72439.1	52973.8	52418.8	60544.9	83496.1	51422	58583.6	45493.4	66992.3	47494.4	30137	67517.5	59547.6	MOUSE
F8WHY8	Metastasis-associated protein MTA1 (Metastasis-associated protein MTA1 isoform 2)	Mta1	1	3684.12	19534.1	25031.2	22969.1	4014.32	20781.6	17941.6	9160.64	6009	4397.08	26120.1	26255.4	6948.69	26281.5	1719.15	5101.74	15594.3	4748.23	7159.55	MOUSE
P42125	Enoyl-CoA delta isomerase 1, mitochondrial (EC 5.3.3.8) (3,2-trans-enoyl-CoA isomerase) (Delta(3),Delta(2)-enoyl-CoA isomerase) (D3,D2-enoyl-CoA isomerase) (Dodecenoyl-CoA isomerase)	Eci1	8	395035	308974	368817	490772	818318	616888	596808	468623	384193	528356	552193	535721	505983	454509	607704	790411	582082	619685	611309	MOUSE
A0A0R4J079	Golgi resident protein GCP60	Acbd3	5	124266	101400	121143	169996	122381	79528.9	123497	96845.3	101458	97549	144279	119187	125899	112087	118801	129926	86230	127554	69981.2	MOUSE
Q91VA6	Polymerase delta-interacting protein 2	Poldip2	4	217981	194957	237404	330678	326822	303341	252570	229956	201986	235423	271957	358750	277210	298862	399338	381254	282991	309489	354202	MOUSE
Q9CW46	Ribonucleoprotein PTB-binding 1 (Protein raver-1)	Raver1	3	117534	92107	119107	149880	220592	121401	182868	114388	116077	129184	138206	157142	137701	159916	160356	239370	170219	190314	205832	MOUSE
P62082	40S ribosomal protein S7	Rps7	9	4171370	3.46056e+06	4720273	5.80949e+06	4.27969e+06	2.60923e+06	4233399	4371849	4.04788e+06	4.65296e+06	5.53093e+06	4.52759e+06	3.92239e+06	3804200	4758340	4243117	3549378	4.84437e+06	5.12929e+06	MOUSE
Q9CR62	Mitochondrial 2-oxoglutarate/malate carrier protein (OGCP) (Solute carrier family 25 member 11)	Slc25a11	9	427478	375796	353481	614267	578603	327263	340592	396913	385968	529006	562708	506156	277792	415980	362118	234774	245946	225902	437427	MOUSE
Q9D1Q6	Endoplasmic reticulum resident protein 44 (ER protein 44) (ERp44) (Thioredoxin domain-containing protein 4)	Erp44	3	134399	158004	186232	215297	160227	227046	162740	109204	151306	61853.4	145207	164495	164851	153201	225106	180535	170477	188632	202918	MOUSE
Q9WUK4	Replication factor C subunit 2 (Activator 1 40 kDa subunit) (A1 40 kDa subunit) (Activator 1 subunit 2) (Replication factor C 40 kDa subunit) (RF-C 40 kDa subunit) (RFC40)	Rfc2	5	57400.1	131181	140519	166879	164189	115485	160609	92916.3	109137	118949	167009	152568	139766	147145	207094	235856	198813	246676	266809	MOUSE
Q921M7	CYFIP-related Rac1 interactor B (Protein FAM49B)	Cyrib	8	281182	259859	327300	413667	303823	262682	251613	269802	277841	260050	382968	295591	282875	244231	311000	346623	304445	397424	376785	MOUSE
Q9CY73	39S ribosomal protein L44, mitochondrial (L44mt) (MRP-L44) (EC 3.1.26.-)	Mrpl44	3	79214.8	67429.1	94637	67645.5	95094.1	59077.3	78784.8	77132.7	78782.3	89525.1	116867	100558	92527.6	94586.1	111046	113348	84203.6	66191.7	75625.3	MOUSE
Q9DBS1	Transmembrane protein 43 (Protein LUMA)	Tmem43	5	231952	227400	255449	345955	174914	144048	142105	228941	240732	350622	404822	125569	97501.2	114304	179064	102686	68987.4	104507	42816.6	MOUSE
Q8BJW5	Nucleolar protein 11	Nol11	5	127513	121856	148157	193143	172004	136206	143675	159393	168773	203714	230059	170203	117400	160244	238302	193588	183765	234911	227865	MOUSE
P59325	Eukaryotic translation initiation factor 5 (eIF-5)	Eif5	4	336326	337675	406802	551018	432993	360581	431326	359768	363147	375235	459126	290306	269196	273442	350482	331365	305848	386938	423799	MOUSE
P60670	Nuclear protein localization protein 4 homolog (Protein NPL4)	Nploc4	5	127226	112327	148342	161602	177029	142765	181177	105577	102129	119931	152337	129836	80304.5	80629.3	126770	186291	131663	200967	196639	MOUSE
K3W4T3	V-type proton ATPase subunit a	Atp6v0a1	3	96967.6	81368.4	118956	170234	120780	130045	85643.5	94188.4	167670	95569.4	127023	106898	73580.6	107423	152706	84680.3	112002	102179	131434	MOUSE
Q8BI84	Transport and Golgi organization protein 1 homolog (TANGO1) (Melanoma inhibitory activity protein 3)	Mia3	2	38578	43290.9	43309.2	43983.3	19168.4	10335.2	18691.1	19653.1	27883.3	46826.6	61574	30698	34037.5	42827.1	25033.8	10877.4	54755.5	32994	19941.9	MOUSE
Q99J99	3-mercaptopyruvate sulfurtransferase (MST) (EC 2.8.1.2)	Mpst	6	232393	163570	236933	337405	396446	357229	368707	289813	261504	296904	359890	332593	288021	286709	341910	530099	442460	506894	561107	MOUSE
Q922J9	Fatty acyl-CoA reductase 1 (EC 1.2.1.84)	Far1	5	244523	249868	279261	385478	304648	314049	234357	215929	228955	270168	320622	295882	266719	283102	315591	369283	263298	336196	304806	MOUSE
A0A1Y7VJ48	Tubulin-specific chaperone A	Tbca	1	114757	128825	137471	126084	155644	177942	164254	140670	163843	145590	150853	130819	165306	114049	172099	104248	135146	154712	149776	MOUSE
Z4YKB8	Heterochromatin protein 1-binding protein 3	Hp1bp3	4	298868	245488	226927	163340	163623	267400	146489	160347	164859	327992	375142	256800	233726	225032	275098	204304	95174.3	233124	90753.5	MOUSE
P00493	Hypoxanthine-guanine phosphoribosyltransferase (HGPRT) (HGPRTase) (EC 2.4.2.8) (HPRT B)	Hprt1	8	807918	673630	905501	1.04777e+06	1224292	1.09925e+06	937325	800966	903617	803038	1.16768e+06	996503	882388	705115	1.12026e+06	866652	753354	895178	1083500	MOUSE
P52431	DNA polymerase delta catalytic subunit (EC 2.7.7.7) (3'-5' exodeoxyribonuclease) (EC 3.1.11.-)	Pold1	2	16391.6	15220.3	28122.7	40455.2	22370.2	18272.5	31704.9	17557.8	26293	26883.5	25737.8	23312.8	21121.9	12683.5	18881.2	43201.1	24658.1	29001	48790.9	MOUSE
F8WJA0	RNA helicase (EC 3.6.4.13)	Ddx24	4	36018.2	33879.4	61179.8	73288.4	34638.4	50265.1	54828.9	68066.3	73630.1	77693.9	77807.4	65082.3	55872.5	57685.1	72593.4	71512.1	60496.7	77003.8	67820.4	MOUSE
P10605	Cathepsin B (EC 3.4.22.1) (Cathepsin B1) [Cleaved into: Cathepsin B light chain;Cathepsin B heavy chain]	Ctsb	7	597786	534768	769767	756462	937521	795174	881144	773574	663640	879311	902417	775596	675992	683671	851842	823887	694455	700253	746972	MOUSE
Q3TCN2	Putative phospholipase B-like 2 (EC 3.1.1.-) (66.3 kDa protein) (76 kDa protein) (p76) (LAMA-like protein 2) (Lamina ancestor homolog 2) (Phospholipase B domain-containing protein 2) [Cleaved into: Putative phospholipase B-like 2 28 kDa form;Putative phospholipase B-like 2 40 kDa form;Putative phospholipase B-like 2 15 kDa form]	Plbd2	5	188926	146148	196423	221711	356449	290023	282719	184585	156013	184677	233216	315736	284205	267995	372615	396690	285776	329151	357885	MOUSE
Q91ZE0	Trimethyllysine dioxygenase, mitochondrial (EC 1.14.11.8) (Epsilon-trimethyllysine 2-oxoglutarate dioxygenase) (TML hydroxylase) (TML-alpha-ketoglutarate dioxygenase) (TML dioxygenase) (TMLD)	Tmlhe	4	116857	91757.4	122398	163250	209790	177882	131060	266593	106597	136908	158024	196585	180028	185029	257573	207313	172151	162588	207286	MOUSE
Q61823	Programmed cell death protein 4 (Protein MA-3) (Topoisomerase-inhibitor suppressed protein)	Pdcd4	6	185669	104562	201852	230707	314114	247891	217442	158589	146767	175526	207584	281899	221814	225114	270968	153299	130746	171553	209214	MOUSE
P63330	Serine/threonine-protein phosphatase 2A catalytic subunit alpha isoform (PP2A-alpha) (EC 3.1.3.16)	Ppp2ca	6	314071	268689	345228	455110	423829	364833	323613	359532	311248	324469	397619	380976	287748	302935	431092	373504	292710	379131	386618	MOUSE
Q6PGF5	BMS1 homolog, ribosome assembly protein (Yeast) (BMS1, ribosome biogenesis factor)	Bms1	5	88395.5	78423.9	101230	110034	82260.2	73446.8	69566.3	89310.8	91618.6	115290	134836	114167	105717	74169.1	96702.4	130989	73727.6	99824.9	124834	MOUSE
Q6P1B9	Bin1 protein (Myc box-dependent-interacting protein 1)	Bin1	9	347090	365066	483450	553266	464079	287535	331413	439213	464799	504298	556535	499550	431662	404676	550061	349234	390994	413988	488269	MOUSE
Q922U1	U4/U6 small nuclear ribonucleoprotein Prp3 (Pre-mRNA-splicing factor 3)	Prpf3	3	127777	141314	140000	98281.4	84711.7	86416.7	76443.8	151228	156942	134073	160629	88631.8	57996.2	69257.9	80285.4	81369.2	75426.6	74597.4	64945.8	MOUSE
P49722	Proteasome subunit alpha type-2 (Macropain subunit C3) (Multicatalytic endopeptidase complex subunit C3) (Proteasome component C3)	Psma2	9	1.48374e+06	1.37245e+06	1.74599e+06	2.12926e+06	2.09537e+06	1.4821e+06	1875494	1.68716e+06	1.57325e+06	1.71809e+06	2.00295e+06	2017663	1.78251e+06	1.73222e+06	2.22865e+06	2.30071e+06	1.93203e+06	2319761	2.53489e+06	MOUSE
E9QMK9	D-glutamate cyclase, mitochondrial	Dglucy	5	70789.9	43077.1	90693.2	100105	122046	121270	106833	66699.9	58460.9	92568.4	94261.9	118073	92219.2	111114	139921	125995	96997.6	126625	156986	MOUSE
Q9D031	Ras suppressor protein 1	Rsu1	7	452747	403839	570366	584107	421651	417400	481080	357120	411006	434581	596116	524554	546637	398986	594020	322991	354444	369044	452766	MOUSE
Q99LD8	N(G),N(G)-dimethylarginine dimethylaminohydrolase 2 (DDAH-2) (Dimethylarginine dimethylaminohydrolase 2) (EC 3.5.3.18) (DDAHII) (Dimethylargininase-2)	Ddah2	3	41653.2	36648.1	39832.2	51010.7	80728.6	85884.6	69974.5	38023	27593.2	27795.5	27680	56663	22773.7	20549.5	49074.5	26014.6	15081.2	31963.5	25154.7	MOUSE
Q9CYH6	Ribosome biogenesis regulatory protein homolog	Rrs1	4	146163	145186	178774	176845	133352	91713.5	136952	187431	173616	216924	208274	196471	324922	131037	216663	237203	157068	209754	207329	MOUSE
B1AT82	Phosphoribosyl pyrophosphate synthase-associated protein 1	Prpsap1	8	205059	209280	266490	321331	273130	231845	264227	258689	250603	290142	372781	232814	238479	208854	255481	276750	248733	313000	337929	MOUSE
P52633	Signal transducer and transcription activator 6	Stat6	3	79704.4	69687.5	92378.3	109576	125723	105871	106667	70591.7	80387.7	94075.2	117454	84035.5	95905.6	76001.1	84243.1	100338	84176.6	107017	132808	MOUSE
P15626	Glutathione S-transferase Mu 2 (EC 2.5.1.18) (GST 5-5) (GST class-mu 2) (Glutathione S-transferase pmGT2)	Gstm2	7	179132	152323	210794	216781	285743	253365	223497	186416	149351	172347	185015	225689	185855	165034	218597	292856	280778	362000	380580	MOUSE
G5E8V9	ADP-ribosylation factor-interacting protein 1	Arfip1	1	14790.4	16238.8	18287.7	19640.3	21105.2	22709.4	18887.3	14688.6	14285.2	16773.3	19720	16038.8	18101	14718.7	19923.8	18666.3	19044	20171.5	23019.1	MOUSE
P23591	GDP-L-fucose synthase (EC 1.1.1.271) (GDP-4-keto-6-deoxy-D-mannose-3,5-epimerase-4-reductase) (Protein FX) (Red cell NADP(H)-binding protein) (Transplantation antigen P35B) (Tum-P35B antigen)	Gfus	5	305821	260008	353511	458855	680322	679599	515374	343658	356722	406257	471941	430914	428426	350455	470924	504868	434990	594614	599777	MOUSE
Q9JHP7	Protein O-glucosyltransferase 2 (EC 2.4.1.-) (Endoplasmic reticulum resident protein 58) (ER protein 58) (ERp58) (KDEL motif-containing protein 1) (Protein O-xylosyltransferase POGLUT2) (EC 2.4.2.-)	Poglut2	6	117324	111302	155162	167216	135939	105664	124105	127453	141820	149956	159211	181007	175332	178485	215693	168366	137000	163508	182730	MOUSE
P05132	cAMP-dependent protein kinase catalytic subunit alpha (PKA C-alpha) (EC 2.7.11.11)	Prkaca	4	92745.8	58168.3	105020	109678	111852	65328.5	92789	79107.6	80537.4	81807.7	112734	72196.1	86955.1	53792.9	106632	96437.7	94571.6	75383.2	111989	MOUSE
A2AWP6	Rho guanine nucleotide exchange factor 10-like protein	Arhgef10l	2	16415.3	27691.5	41413.9	48021.1	50031.9	61152.1	42170.8	42617.8	39174.2	20973.2	47148.9	41963.3	21901.8	32122.3	47631.2	36012.2	28100.3	43381.5	36552.2	MOUSE
G5E897	Protein O-glucosyltransferase 3 (EC 2.4.1.-) (KDEL motif-containing protein 2) (Protein O-xylosyltransferase POGLUT3) (EC 2.4.2.-)	Poglut3	6	201606	159064	226238	296600	299038	202795	208388	205158	181346	234831	277588	287335	262011	282672	329035	245223	184730	205591	246479	MOUSE
P51855	Glutathione synthetase (GSH synthetase) (GSH-S) (EC 6.3.2.3) (Glutathione synthase)	Gss	5	155521	150324	188303	269465	260656	130490	229319	196888	117571	192930	150028	194204	225966	140609	288326	312675	129872	196566	290516	MOUSE
P68510	14-3-3 protein eta	Ywhah	6	171597	322449	381634	386975	300054	376191	301689	252628	333551	165258	330023	385496	390166	319118	469524	190006	162219	383447	376522	MOUSE
A0A0R4J008	Histone deacetylase 2 (HD2) (EC 3.5.1.98)	Hdac2	3	54773.1	52547.8	96966.6	97177.5	88002	83895.8	90047.6	52599	62861.1	65887.9	79326.7	107066	135285	118806	193306	121630	153696	207785	203014	MOUSE
Q62523	Zyxin	Zyx	9	879994	800681	1.00889e+06	1.0139e+06	685465	705907	717782	881577	863846	892485	969407	938698	889605	750211	1.13903e+06	783082	777637	826504	931924	MOUSE
E9PUF7	Rho guanine nucleotide exchange factor 1	Arhgef1	2	36239.6	26312.6	40573.8	53770.9	48495.1	34879.5	33519	37088.2	39200.2	36568	41938.6	34262.2	41536.5	41410.5	50593.1	50057.7	12987.3	44021	49012.3	MOUSE
A0A0U1RNT6	S-adenosylmethionine synthase (EC 2.5.1.6)	Mat2a	4	440265	449771	538405	676214	594682	569991	550619	507189	496789	538202	649602	555727	544308	487464	624405	653837	568558	723514	753838	MOUSE
Q9DB73	NADH-cytochrome b5 reductase 1 (b5R.1) (EC 1.6.2.2) (NAD(P)H:quinone oxidoreductase type 3 polypeptide A2)	Cyb5r1	5	281733	268718	221827	383077	270291	185696	311338	373019	358418	479135	508193	219684	153869	126262	116339	174134	182570	169568	187665	MOUSE
A0A0A0MQM0	Eukaryotic translation initiation factor 5A (eIF-5A) (Fragment)	Eif5a	5	1.11127e+06	939194	1.26764e+06	1520275	1.21524e+06	787122	1.08775e+06	1.09418e+06	1.18083e+06	1.20921e+06	1.56513e+06	1.29326e+06	1.07217e+06	1.09329e+06	1.33722e+06	1.28162e+06	1.11762e+06	1.9299e+06	1440655	MOUSE
Q9CZX8	40S ribosomal protein S19	Rps19	7	1.14433e+06	973175	1.12651e+06	2.00811e+06	1.0198e+06	1.26066e+06	749102	1.28619e+06	1.89331e+06	1.6524e+06	1.91158e+06	1.07299e+06	858340	759257	942702	856467	717447	979338	1.43864e+06	MOUSE
F8VQ29	IQ motif-containing GTPase-activating protein 3	Iqgap3	1	120652	127863	149212	160144	101743	149350	134027	118180	142808	123173	130509	113984	136523	120961	174874	133098	139583	186858	171930	MOUSE
Q9D0L8	mRNA cap guanine-N7 methyltransferase (EC 2.1.1.56) (RG7MT1) (mRNA (guanine-N(7)-)-methyltransferase) (mRNA cap methyltransferase)	Rnmt	3	102732	95069.3	120517	171339	144903	123592	126150	123791	125911	156942	192836	110270	114618	106504	152538	127451	139022	173311	177668	MOUSE
Q9D9V3	Ethylmalonyl-CoA decarboxylase (EC 4.1.1.94) (Enoyl-CoA hydratase domain-containing protein 1) (Methylmalonyl-CoA decarboxylase) (MMCD)	Echdc1	7	209198	135200	232257	246215	246685	213342	218754	207006	204859	185297	227022	247529	220610	198312	262317	216487	199352	249654	247035	MOUSE
P52825	Carnitine O-palmitoyltransferase 2, mitochondrial (EC 2.3.1.21) (Carnitine palmitoyltransferase II) (CPT II)	Cpt2	1	14240.2	912.18	16293	20241.2	30398.6	10696.7	28246.6	10260.5	11499.6	14324.1	12885.6	10931.5	13312.8	14615.8	19920	12877.9	16443.3	14124.1	15532	MOUSE
Q99MJ9	ATP-dependent RNA helicase DDX50 (EC 3.6.4.13) (DEAD box protein 50) (Gu-beta) (Nucleolar protein Gu2)	Ddx50	3	99168.2	84889.8	118318	136647	76252.1	50293.5	70806.5	78934.5	83308.6	94994	98988.8	102272	103579	100074	352176	132517	100120	111548	125545	MOUSE
E9Q7Q3	Tropomyosin alpha-3 chain	Tpm3	4	445261	412308	441440	443369	543583	680168	572549	478782	500176	503389	534450	425836	439948	326440	462147	410659	437214	458747	446763	MOUSE
Q9DCD2	Pre-mRNA-splicing factor SYF1 (XPA-binding protein 2)	Xab2	3	28222.8	27980.6	23995.4	31568.5	50354.6	40180.1	35411.2	43683.3	31949.8	30415.9	55674.8	53213.3	50209.8	60416.2	62459.8	76424.9	52899.7	66398	58561.7	MOUSE
Q8C3V4	Signal transducer and activator of transcription	Stat1	1	35522.5	44623.7	38916.1	54152.5	56242.5	57359.1	56346.7	42120.1	11776	36652.9	51203.3	50056	36439.6	45943.8	61892.4	72580.4	54099.8	78431.5	72969.9	MOUSE
Q8BIW1	Exopolyphosphatase PRUNE1 (EC 3.6.1.1) (PRUNEM1)	Prune1	4	91041	79122.7	112482	135027	150613	132359	132802	48778.9	120081	67325	85167	134886	45057.6	122685	77721.4	91640.8	48439.6	132626	55162.6	MOUSE
Q9DBH5	Vesicular integral-membrane protein VIP36 (Lectin mannose-binding 2) (Vesicular integral-membrane protein 36) (VIP36)	Lman2	5	326472	309495	358715	544366	187570	313669	287023	255841	296193	349568	390823	294714	226028	319954	253158	189456	176608	237832	282648	MOUSE
E9QN12	Platelet-derived growth factor receptor beta (PDGF-R-beta) (PDGFR-beta) (EC 2.7.10.1) (Beta platelet-derived growth factor receptor) (Beta-type platelet-derived growth factor receptor)	Pdgfrb	7	271062	274175	292452	341031	314330	334041	293436	224714	249210	240494	284764	274687	246687	234206	329395	201315	194005	241122	204419	MOUSE
Q7TNC4	Putative RNA-binding protein Luc7-like 2 (CGI-74 homolog)	Luc7l2	3	157126	153033	185770	224080	258454	275927	220646	191737	171445	173402	237281	200912	189955	162635	246508	280979	238227	293704	291419	MOUSE
P45377	Aldose reductase-related protein 2 (AR) (EC 1.1.1.21) (Aldehyde reductase) (Fibroblast growth factor-regulated protein) (Protein FR-1)	Akr1b8	2	45596.8	30485	58079.8	46777.8	97822.7	48759.5	87430.4	56229.9	49761.5	65525.6	75302.2	60444.8	49036.2	59523.1	78620.1	82973.3	72807.6	114606	102246	MOUSE
Q6PFB2	Rcc1 protein (Regulator of chromosome condensation)	Rcc1	7	417275	406442	493461	566708	359003	424360	427191	419102	394919	507544	584941	300493	394289	363653	430096	404942	410168	500568	447361	MOUSE
A0A3B2WCL5	Ran-binding protein 3	Ranbp3	6	259808	254259	287730	327525	336971	330448	287830	325398	335355	345486	357488	271116	259503	227180	330872	325065	281529	324536	383955	MOUSE
Q8CCF0	U4/U6 small nuclear ribonucleoprotein Prp31 (Pre-mRNA-processing factor 31) (U4/U6 snRNP 61 kDa protein) (Protein 61K)	Prpf31	5	156075	169261	186325	267884	257378	250669	262430	195618	173730	208649	263547	242342	230157	224772	268765	326374	288965	335013	353657	MOUSE
Q99J77	Sialic acid synthase (N-acetylneuraminate-9-phosphate synthase) (EC 2.5.1.57) (N-acetylneuraminic acid phosphate synthase)	Nans	7	258724	160373	314168	369568	333791	285390	267507	254465	229174	248234	345919	298927	268984	224013	385681	256210	216960	222201	276896	MOUSE
P62242	40S ribosomal protein S8	Rps8	7	1.73971e+06	1674759	2.06348e+06	2.28625e+06	2.08728e+06	1.96433e+06	1.63452e+06	2.03598e+06	1.82984e+06	1.87116e+06	2.20137e+06	2305976	1.7473e+06	1.56061e+06	2.24757e+06	1.93547e+06	1.5092e+06	2.05049e+06	2.19814e+06	MOUSE
Q8K3X4	Probable E3 ubiquitin-protein ligase IRF2BPL (EC 2.3.2.27) (Enhanced at puberty protein 1) (Interferon regulatory factor 2-binding protein-like)	Irf2bpl	6	120832	94348.6	126649	158082	207500	192293	172214	138092	145208	156654	160897	162032	116671	138620	196868	237476	174331	225178	247234	MOUSE
Q62009	Periostin (PN) (Osteoblast-specific factor 2) (OSF-2)	Postn	5	102299	77607.9	117254	134614	62692.5	21235.8	84832	99573.5	183595	184637	123092	175373	184134	168222	201916	108651	85458.9	103020	226265	MOUSE
Q9CWX9	Probable ATP-dependent RNA helicase DDX47 (EC 3.6.4.13) (DEAD box protein 47)	Ddx47	4	95926.6	118046	130228	200894	104397	105354	133181	131689	156201	163148	186335	155456	145336	145942	180133	195429	156640	189311	209591	MOUSE
Q91WG4	Elongator complex protein 2 (ELP2) (STAT3-interacting protein 1) (StIP1)	Elp2	1	30790	26422.3	32991.7	43789.7	38632.6	35429.3	39591.8	31511.6	36275.5	41498.6	42010.4	33308.5	30326.5	30836.4	38117.4	33083.5	35133.2	44458.8	47710	MOUSE
Q9R112	Sulfide:quinone oxidoreductase, mitochondrial (SQOR) (EC 1.8.5.8) (Sulfide quinone oxidoreductase)	Sqor	5	144381	92784.6	123932	143542	198645	183037	160719	108851	101749	136847	160247	142539	120112	132189	195189	199936	144660	170923	220998	MOUSE
P62962	Profilin-1 (Profilin I)	Pfn1	7	8.08435e+06	7191449	8871898	12023915	12507892	8949690	9680005	8733112	8266896	8724310	10769587	10395241	8.2356e+06	7974659	10216737	9288039	7.17472e+06	9534922	10497090	MOUSE
Q8CJ53	Cdc42-interacting protein 4 (Thyroid receptor-interacting protein 10) (TR-interacting protein 10) (TRIP-10)	Trip10	1	6173.78	2702.7	37260.3	44495.9	19054	975.469	7111.7	29623.8	38804.5	32535.6	21292.8	1342.36	15877.2	10003.1	41575.7	3402.67	6396.63	25887.8	8149.29	MOUSE
P53994	Ras-related protein Rab-2A	Rab2a	7	561617	576300	584858	874438	497049	492889	502424	485772	524107	584858	744809	634625	545987	551956	662446	590449	485224	579122	440625	MOUSE
Q61578	NADPH:adrenodoxin oxidoreductase, mitochondrial (AR) (Adrenodoxin reductase) (EC 1.18.1.6) (Ferredoxin--NADP(+) reductase) (Ferredoxin reductase)	Fdxr	6	110270	122847	144771	187749	194969	175143	190090	153380	129134	174622	214355	249815	179036	189720	243683	274367	196064	217063	279531	MOUSE
Q8CI71	Syndetin (Bcl2-like protein blm) (Coiled-coil domain-containing protein 132) (EARP/GARPII complex subunit VPS50)	Vps50	1	9600.09	3706.28	321.262	5504.78	2739.89	3037.12	7131.7	5036.72	5319.62	4942.99	8482.89	17255.1	7393.26	9409.19	4985.12	9393.99	1873.11	15066.1	3730.48	MOUSE
Q9D832	DnaJ homolog subfamily B member 4	Dnajb4	4	126102	122635	184491	225437	166055	118360	153870	175434	179794	201713	238539	158802	158788	163528	214497	153244	96971.2	152269	110331	MOUSE
Q9WUD1	E3 ubiquitin-protein ligase CHIP (EC 2.3.2.27) (Carboxy terminus of Hsp70-interacting protein) (RING-type E3 ubiquitin transferase CHIP) (STIP1 homology and U box-containing protein 1)	Stub1	5	111472	234584	228421	345862	358569	499017	336004	311008	301065	257450	389632	258730	283257	204629	239326	231699	204397	245480	307548	MOUSE
Q9DAR7	m7GpppX diphosphatase (EC 3.6.1.59) (DCS-1) (Decapping scavenger enzyme) (Hint-related 7meGMP-directed hydrolase) (Histidine triad nucleotide-binding protein 5) (Histidine triad protein member 5) (HINT-5) (Scavenger mRNA-decapping enzyme DcpS)	Dcps	5	194053	154915	184012	268174	242929	180292	175271	166713	162211	206091	225161	190929	153499	149571	204775	130364	201194	214979	272644	MOUSE
Q8K183	Pyridoxal kinase (EC 2.7.1.35) (Pyridoxine kinase)	Pdxk	4	95739.8	86219.5	116988	144034	150355	105241	124374	86443.7	116380	128305	144934	140660	122579	108687	146991	113441	125456	130196	160003	MOUSE
Q60931	Voltage-dependent anion-selective channel protein 3 (VDAC-3) (mVDAC3) (Outer mitochondrial membrane protein porin 3)	Vdac3	9	910109	815192	1.05079e+06	1.26207e+06	1.00912e+06	1.07467e+06	749442	972032	967094	1.13582e+06	1336974	1.19161e+06	764014	976497	1.11254e+06	987493	790135	885624	791643	MOUSE
Q9CQ60	6-phosphogluconolactonase (6PGL) (EC 3.1.1.31)	Pgls	10	1.13991e+06	1.0455e+06	1446306	1.72398e+06	1.99317e+06	1.65822e+06	1.67022e+06	1.33593e+06	1195405	1333492	1.67871e+06	1.84436e+06	1.56667e+06	1.46576e+06	1999702	1.54368e+06	1.38636e+06	1.7407e+06	1.88739e+06	MOUSE
O88986	2-amino-3-ketobutyrate coenzyme A ligase, mitochondrial (AKB ligase) (EC 2.3.1.29) (Aminoacetone synthase) (Glycine acetyltransferase)	Gcat	2	81939.5	54433.8	87815.4	108171	118145	56252.1	104809	82611.7	93370.7	106352	133080	153456	117290	140338	162094	165196	113690	131582	144377	MOUSE
A0A0R4J0P6	Poly(A)-specific ribonuclease PARN (EC 3.1.13.4) (Polyadenylate-specific ribonuclease)	Parn	2	22559.8	43640.8	35192.4	63095.9	60695	49675.7	28858.2	43726.1	29046.9	46275.2	37663.3	51268	23659	53851.3	66778.8	63675.7	40209	35484.4	40600.8	MOUSE
Q06138	Calcium-binding protein 39 (MO25alpha) (Protein Mo25)	Cab39	4	122225	105172	130329	171399	109342	105919	122555	145421	138575	91134.2	154878	142270	117409	78279.8	101799	142364	136286	114384	115935	MOUSE
Q9D0G0	28S ribosomal protein S30, mitochondrial (MRP-S30) (S30mt)	Mrps30	5	141595	142977	131231	159312	202608	136671	153918	182018	180607	175657	195930	227524	171196	186217	227343	203917	177556	237137	196469	MOUSE
A0A0A0MQ80	Vesicle-fusing ATPase (EC 3.6.4.6)	Spata5	3	56866.7	39924.5	52945.1	71313.3	50804.9	62560.1	48375.9	63363.3	61882.3	70165.4	90158.8	52279.6	56673.5	28078.9	50058.6	75637.6	47389	58913.5	62331.2	MOUSE
O35134	DNA-directed RNA polymerase I subunit RPA1 (RNA polymerase I subunit A1) (EC 2.7.7.6) (DNA-directed RNA polymerase I largest subunit) (DNA-directed RNA polymerase I subunit A) (RNA polymerase I 194 kDa subunit) (RPA194)	Polr1a	2	42064.9	7111.56	19372.2	28439.3	47362.5	43562.5	35492.9	48152.5	50845.2	13313.9	61725.4	49159.1	44098.8	41068	55898.7	59197.4	46472.7	57331.2	55638.4	MOUSE
O54984	ATPase GET3 (EC 3.6.-.-) (Arsenical pump-driving ATPase) (Arsenite-stimulated ATPase) (Guided entry of tail-anchored proteins factor 3, ATPase)	Get3	7	445402	399847	515674	291785	672340	568651	537783	477626	468050	505544	546626	753952	638144	670552	507880	720529	492811	724271	693746	MOUSE
A2AMV1	Ribosome assembly factor mrt4	Mrto4	5	282453	267828	247017	383324	270946	198653	275085	301062	252387	285040	417299	295728	302650	274346	338728	338730	290684	361494	353613	MOUSE
O08807	Peroxiredoxin-4 (EC 1.11.1.24) (Antioxidant enzyme AOE372) (Peroxiredoxin IV) (Prx-IV) (Thioredoxin peroxidase AO372) (Thioredoxin-dependent peroxide reductase A0372) (Thioredoxin-dependent peroxiredoxin 4)	Prdx4	7	451051	424256	512788	601406	650020	620349	471032	476782	479828	528469	604106	698211	583173	571630	689826	669740	466001	501212	566950	MOUSE
Q8K0C4	Lanosterol 14-alpha demethylase (LDM) (EC 1.14.14.154) (CYPLI) (Cytochrome P450 51A1) (Cytochrome P450-14DM) (Cytochrome P45014DM) (Cytochrome P450LI) (Sterol 14-alpha demethylase)	Cyp51a1	8	353876	317480	385125	498597	155517	148647	146128	238589	288093	355220	373395	185996	245548	271584	225574	163577	168420	208510	129011	MOUSE
Q9WV54	Acid ceramidase (AC) (ACDase) (Acid CDase) (EC 3.5.1.23) (Acylsphingosine deacylase) (N-acylethanolamine hydrolase ASAH1) (EC 3.5.1.-) (N-acylsphingosine amidohydrolase) [Cleaved into: Acid ceramidase subunit alpha;Acid ceramidase subunit beta]	Asah1	7	244979	185155	283572	378313	532862	377360	418961	326888	288735	385258	411238	398219	326506	353980	419676	415701	276711	387891	340304	MOUSE
G3UZM9	Protein kinase C (EC 2.7.11.13)	Pkn2	2	27892.9	27548.7	32218.8	37058.1	21280.5	40835.5	32427.1	28711	27047.4	16840.7	35936.8	34429.4	32136.4	17675.7	15450.1	13733.3	29126.2	35241.1	15159.2	MOUSE
F7D432	Protein-L-isoaspartate O-methyltransferase (EC 2.1.1.77) (Fragment)	Pcmt1	3	184213	120222	209875	218701	198373	135091	140547	203469	127811	158528	204086	259129	156240	228587	301417	282650	200454	280557	134509	MOUSE
O55106	Striatin	Strn	1	14979.8	14333.4	20954.4	16751.8	28503.2	27887.2	13557.5	15171.2	21224.3	15195	19214.9	21678.7	20995	12335.4	30638.4	20372.4	4720.25	32929.5	2784.95	MOUSE
Q8K1N2	Pleckstrin homology-like domain family B member 2 (Protein LL5-beta)	Phldb2	1	14303.5	6957.91	8202.27	1928.89	3686.77	3842.16	6543.06	6219.26	6731.26	7855.97	5325.92	1192.63	9244.26	4679.62	9230.12	687.525	4401.09	3503.66	1930.78	MOUSE
P19253	60S ribosomal protein L13a (Transplantation antigen P198) (Tum-P198 antigen)	Rpl13a	3	903401	946921	1090757	1.12958e+06	1.02472e+06	1.098e+06	902241	983266	1.02886e+06	1.02226e+06	1113976	1.07476e+06	957465	790120	1.14497e+06	970993	934003	1.11445e+06	1.14714e+06	MOUSE
O89079	Coatomer subunit epsilon (Epsilon-coat protein) (Epsilon-COP)	Cope	4	214864	179295	247172	314226	306293	277840	240743	213296	219325	236843	216147	255348	251177	219924	304176	279831	233533	287925	296996	MOUSE
P97346	Nucleoredoxin (EC 1.8.1.8) (Protein Red-1)	Nxn	5	172188	157420	227488	223322	179333	184238	206071	148674	157793	120670	198376	248608	199060	163237	295114	248838	181872	285439	297483	MOUSE
Q9R0H0	Peroxisomal acyl-coenzyme A oxidase 1 (AOX) (EC 1.3.3.6) (Palmitoyl-CoA oxidase) [Cleaved into: Peroxisomal acyl-CoA oxidase 1, A chain;Peroxisomal acyl-CoA oxidase 1, B chain;Peroxisomal acyl-CoA oxidase 1, C chain]	Acox1	2	9674.31	18153.2	17731.9	31640.9	51593.6	21069.6	43940.3	16117.6	15974.4	25338.2	22139.2	30945.8	24647.2	34285.6	16015.2	35958.6	37711.9	45082.4	36340.4	MOUSE
Q8CBM2	Aspartyl/asparaginyl beta-hydroxylase	Asph	6	227032	227654	268224	408701	143915	84952.9	164336	196332	153861	354245	404460	133358	155259	165504	155157	83681.4	110217	181009	127031	MOUSE
Q8BTV2	Cleavage and polyadenylation specificity factor subunit 7	Cpsf7	5	197982	161920	175168	206128	159488	191255	165844	175119	187640	176412	220753	158296	183420	165437	197253	164373	221618	203954	217838	MOUSE
P63328	Serine/threonine-protein phosphatase 2B catalytic subunit alpha isoform (EC 3.1.3.16) (CAM-PRP catalytic subunit) (Calmodulin-dependent calcineurin A subunit alpha isoform) (CNA alpha)	Ppp3ca	7	219959	274511	282709	389107	554834	563143	517991	313242	325282	406755	425027	431932	375576	280741	494210	370287	377980	473859	521591	MOUSE
P70404	Isocitrate dehydrogenase [NAD] subunit gamma 1, mitochondrial (Isocitric dehydrogenase subunit gamma) (NAD(+)-specific ICDH subunit gamma)	Idh3g	5	187600	164499	236683	286493	273964	227362	227353	216132	182590	245425	289049	285539	236638	271469	341759	334904	235690	261341	293266	MOUSE
Q91V41	Ras-related protein Rab-14	Rab14	7	277067	265627	290632	410702	250230	328453	270872	269088	240949	268875	342189	321642	288134	296434	324854	326342	216757	364226	245614	MOUSE
Q91V55	40S ribosomal protein S5 (Ribosomal protein S5)	Rps5	7	860275	813706	960484	1.24378e+06	912135	722147	645548	865026	1.01074e+06	1.02371e+06	1.08133e+06	871710	826708	707088	868603	746709	665048	995787	988635	MOUSE
Q8BH69	Selenide, water dikinase 1 (EC 2.7.9.3) (Selenium donor protein 1) (Selenophosphate synthase 1)	Sephs1	3	95316.3	73789	105917	137603	136169	86436.5	118401	108293	96357.1	111375	139556	149985	132624	137046	158003	142354	117017	134601	152660	MOUSE
E9QPI5	Sister chromatid cohesion protein PDS5 homolog A	Pds5a	1	12572.5	11052	14741.6	16466.7	7346.03	1789.63	10260.3	9022.41	12787.9	14310.4	15770.9	8972.48	9080.79	10018.2	8904.74	11924.4	12408	13221.1	12532.1	MOUSE
Q6PE70	Integrin beta	Itgb5	4	154916	127176	163137	196559	128461	74028	147956	110428	114865	162585	191381	113808	123680	148701	141785	91669.2	110468	110112	100923	MOUSE
Q3TGM7	HBS1-like protein	Hbs1l	1	3375.35	9434.82	29016.7	29070.4	4489.99	2607.14	4206.32	21052.6	19661	22307.2	30211.6	6342.58	21433.5	18724.8	24445	26141.2	23425.9	28997.9	31822.8	MOUSE
Q3U186	Probable arginine--tRNA ligase, mitochondrial (EC 6.1.1.19) (Arginyl-tRNA synthetase) (ArgRS)	Rars2	5	181235	173918	92266.2	329769	246978	75454.1	81580.7	178300	78308.4	91725.1	201886	119987	81926.7	101034	166897	89775.7	162266	224446	70605.5	MOUSE
Q9CRB9	MICOS complex subunit Mic19 (Coiled-coil-helix-coiled-coil-helix domain-containing protein 3)	Chchd3	4	177867	156393	220081	197214	224225	250475	222062	214564	217679	245197	305724	289117	266925	250559	368612	232241	214050	176431	207326	MOUSE
Q9Z2M7	Phosphomannomutase 2 (PMM 2) (EC 5.4.2.8)	Pmm2	2	149697	143716	178692	219324	196168	180986	189110	124374	167021	166778	220681	173689	176199	154001	205138	114999	111305	178311	165560	MOUSE
Q3UMB9	WASH complex subunit 4 (WASH complex subunit SWIP)	Washc4	4	106808	63412.9	109796	126399	101382	62035.4	118182	104011	95375.8	113434	107420	75416.8	92049.3	68742.1	113656	97675.8	91596.7	109937	106471	MOUSE
A0A0R4J0M9	Ubiquitinyl hydrolase 1 (EC 3.4.19.12)	Vcpip1	1	2971.13	6291.8	6589.29	7898.73	11222.5	12596.9	9714.08	9283.35	6043.68	16141.7	9173.3	7340.65	7166.79	6722.28	8834.29	3675.25	5790.64	2720.61	9275.05	MOUSE
Q8R323	Replication factor C subunit 3 (Activator 1 38 kDa subunit) (A1 38 kDa subunit) (Activator 1 subunit 3) (Replication factor C 38 kDa subunit) (RF-C 38 kDa subunit) (RFC38)	Rfc3	2	33688.7	31018.9	54201.8	23502.8	50334.8	59147.2	37115.7	38141.7	37059.2	67326.5	45981.9	53183.9	47150.5	48031.7	58557.1	82505.2	59716	74982.8	82992.4	MOUSE
Q9ESU7	Amino acid transporter	Slc1a5	5	351218	300988	248018	342942	209431	185064	213562	275573	246472	323672	376168	171340	180689	187547	178047	358044	238167	392959	229650	MOUSE
Q91ZJ5	UTP--glucose-1-phosphate uridylyltransferase (EC 2.7.7.9) (UDP-glucose pyrophosphorylase) (UDPGP) (UGPase)	Ugp2	5	102558	90722.5	89116.8	125830	173708	163206	132756	102028	107549	116817	98417.7	174661	143845	134778	169673	163158	112267	146965	176785	MOUSE
P97355	Spermine synthase (SPMSY) (EC 2.5.1.22) (Spermidine aminopropyltransferase)	Sms	1	5518.54	42764.3	48032.2	78521.4	56182.7	42448.3	34395.7	56798.8	55621.4	55395.1	81691.8	62295.6	49305.4	48368.3	77019	61084.4	43923.5	61469.3	73621	MOUSE
O70152	Dolichol-phosphate mannosyltransferase subunit 1 (EC 2.4.1.83) (Dolichol-phosphate mannose synthase subunit 1) (DPM synthase subunit 1) (Dolichyl-phosphate beta-D-mannosyltransferase subunit 1) (Mannose-P-dolichol synthase subunit 1) (MPD synthase)	Dpm1	5	105740	57481.5	104675	75815.4	144668	92922.3	113541	99403	102672	107978	103500	143878	140656	150573	165716	95188.6	118028	136023	130007	MOUSE
Q9D3U0	tRNA pseudouridine synthase Pus10 (EC 5.4.99.25) (Coiled-coil domain-containing protein 139) (tRNA pseudouridine 55 synthase) (Psi55 synthase) (tRNA pseudouridylate synthase) (tRNA-uridine isomerase)	Pus10	2	159674	188533	214278	244677	154730	56822.2	140825	172308	183495	173033	211926	165510	127463	142946	59746.7	151692	132653	177477	184869	MOUSE
A0A338P769	Septin	Septin5	2	61116.1	54025.1	73836.2	95716.4	116511	116790	95282.4	47336.6	48735.5	60589	75438.4	98762.9	84216.2	84896.1	121226	105109	89722.8	123234	137607	MOUSE
P70460	Vasodilator-stimulated phosphoprotein (VASP)	Vasp	5	159191	117180	205595	171840	131394	227955	195760	181542	173837	215280	212963	182876	208457	147970	253039	160494	181252	230785	224105	MOUSE
Q61425	Hydroxyacyl-coenzyme A dehydrogenase, mitochondrial (HCDH) (EC 1.1.1.35) (Medium and short-chain L-3-hydroxyacyl-coenzyme A dehydrogenase) (Short-chain 3-hydroxyacyl-CoA dehydrogenase)	Hadh	4	454594	390786	608030	708239	1.04677e+06	635614	849605	486348	500177	666786	753939	773852	659403	719429	901106	1.07704e+06	805898	762244	921968	MOUSE
A2AS98	Nck-associated protein 1	Nckap1	5	109897	91653.9	92037.9	167150	151179	113842	153236	92315	103333	102528	176655	137967	100069	85365.1	117031	118651	75520.1	161426	111911	MOUSE
A0A0R4J195	Regulation of nuclear pre-mRNA domain-containing protein 1B	Rprd1b	4	63046.8	67921.3	83235.6	120691	109281	118125	94823.5	87766	89014.6	97290.3	115209	115318	99760.7	114066	140835	124068	109823	141079	141353	MOUSE
E9PUB7	Protein misato homolog 1	Msto1	3	88437.5	70016.7	103336	122795	129500	134147	119882	108739	105436	123006	152726	107104	85894.2	89353.9	115512	115584	84107.2	131258	134338	MOUSE
P53569	CCAAT/enhancer-binding protein zeta (CCAAT-box-binding transcription factor) (CBF) (CCAAT-binding factor)	Cebpz	1	16074.8	16132.8	18040.9	21245.6	14624.3	13530.2	9204.2	4493.37	17668.6	20468	27887.4	13438.8	11532.7	3298.57	9835.85	14983.8	15115.2	13928.8	13218.6	MOUSE
Q9D8U8	Sorting nexin-5	Snx5	5	97360.4	100774	109732	157644	163698	159028	204474	97843.7	95974.1	106312	179973	145264	145386	159348	169477	192496	178394	199940	252618	MOUSE
Q8C0E3	E3 ubiquitin-protein ligase TRIM47 (EC 2.3.2.27) (Tripartite motif-containing protein 47)	Trim47	3	48836.8	40787.3	33922.9	67247.4	109519	52401.2	100416	63524.3	56135.7	74883.6	81061.1	64015.6	70410.1	64846.3	86244.2	104960	110406	120607	116069	MOUSE
P83887	Tubulin gamma-1 chain (Gamma-1-tubulin) (Gamma-tubulin complex component 1) (GCP-1)	Tubg1	4	95880.5	46199.9	97434.7	122790	156051	30941.9	55083.7	88812.2	81683.8	155781	79360.2	153825	153488	91060.4	217228	143741	118358	108962	90511.4	MOUSE
Q5NCU4	Osteonectin (SPARC) (Secreted protein acidic and rich in cysteine)	Sparc	5	760708	750622	905477	1.12308e+06	533198	551414	410619	517653	499348	585772	657570	1.04144e+06	888100	843729	1.08277e+06	694592	477168	566328	614204	MOUSE
Q64442	Sorbitol dehydrogenase (SDH) (SORD) (EC 1.1.1.-) (L-iditol 2-dehydrogenase) (EC 1.1.1.14) (Polyol dehydrogenase) (Xylitol dehydrogenase) (XDH) (EC 1.1.1.9)	Sord	5	181672	191802	238634	186953	286141	256084	274177	143628	149484	177451	190488	306111	226827	243957	282829	255316	210865	260216	350195	MOUSE
Q6PDL0	Cytoplasmic dynein 1 light intermediate chain 2 (Dynein light intermediate chain 2, cytosolic)	Dync1li2	5	103017	140256	126944	162790	87074.1	99233.6	182028	135634	128764	143321	152325	163507	80332.2	156707	159962	169263	186030	205517	233091	MOUSE
Q9D0F6	Replication factor C subunit 5 (Activator 1 36 kDa subunit) (A1 36 kDa subunit) (Activator 1 subunit 5) (Replication factor C 36 kDa subunit) (RF-C 36 kDa subunit) (RFC36)	Rfc5	4	144589	200346	162512	259403	132799	210889	222366	160676	152951	176830	216966	181033	115829	213429	268760	312170	153562	242495	316205	MOUSE
A0A0R3P9C8	NADH dehydrogenase [ubiquinone] 1 alpha subcomplex subunit 9, mitochondrial	Ndufa9	5	142744	108752	110851	185157	120285	124529	144193	89463.2	98263.6	193003	149074	105694	64145.9	94518.7	122559	149144	203721	215494	204406	MOUSE
E9Q9M1	Cytosolic purine 5'-nucleotidase	Nt5c2	5	116505	79220.7	87873.9	141632	161381	79115.5	104448	92677.5	80823.1	102726	123064	81976.6	59345.9	60910.8	93555.2	128025	72967.2	131625	169227	MOUSE
B1B1A8	Myosin light chain kinase, smooth muscle (EC 2.7.11.18) (Myosin light chain kinase, smooth muscle, deglutamylated form) (Telokin)	Mylk	2	21258.1	28979.1	34763.7	37123.3	37809.6	41686.8	37918.6	27611.2	24001.9	29510.2	35904.1	23214.5	37209.8	24932.8	20399.8	31834.9	56516.2	40788.8	39760.8	MOUSE
A0A0R4J0M1	Tubulin-folding cofactor C	Tbcc	1	8108.72	5472.99	14522	20817.2	35963.4	6879.48	16959	2806.64	4990.24	6769.98	18144.5	19655.4	20541	7876.94	12065	30306.6	14884.4	15418.7	24264.5	MOUSE
Q61733	28S ribosomal protein S31, mitochondrial (MRP-S31) (S31mt) (Imogen 38)	Mrps31	3	78553	63003.7	51177	70766.1	49415.7	66690.9	87487	58385.7	61218.9	80953.9	72085.2	63327	66780.4	50590.7	89655.3	62510.1	70442.6	60954.5	72072.7	MOUSE
Q9DCH4	Eukaryotic translation initiation factor 3 subunit F (eIF3f) (Deubiquitinating enzyme eIF3f) (EC 3.4.19.12) (Eukaryotic translation initiation factor 3 subunit 5) (eIF-3-epsilon) (eIF3 p47)	Eif3f	9	1.09572e+06	1.08116e+06	1.31767e+06	1.76547e+06	1.52553e+06	1.46602e+06	1.33593e+06	1.26584e+06	1.22382e+06	1.32305e+06	1.60575e+06	1.51095e+06	1.32385e+06	1.27554e+06	1743416	1.52121e+06	1.25875e+06	1.67868e+06	1.86062e+06	MOUSE
Q8VDM6	Heterogeneous nuclear ribonucleoprotein U-like protein 1	Hnrnpul1	5	134932	156712	198425	154390	250241	297947	256664	178589	129112	200100	143336	125766	178999	169040	258382	188253	167038	284112	241426	MOUSE
E9Q1T1	Calcium/calmodulin-dependent protein kinase (EC 2.7.11.17)	Camk2d	6	219876	181774	249322	296630	336708	324825	278483	223252	208587	251889	291299	195235	176784	104168	237622	263012	223453	288153	291383	MOUSE
Q80ZX0	Sec24-related gene family, member B (S. cerevisiae)	Sec24b	6	369894	138639	217873	426435	612395	170100	227973	204199	202702	254641	565642	291097	160815	455546	340150	311553	209063	266352	239239	MOUSE
Q9D7H3	RNA 3'-terminal phosphate cyclase (RNA cyclase) (RNA-3'-phosphate cyclase) (EC 6.5.1.4) (RNA terminal phosphate cyclase domain-containing protein 1)	RtcA	3	72891	83244.2	102365	132797	157002	127181	110647	114607	109030	118881	130354	135704	105708	98568	148144	140827	111931	163757	154931	MOUSE
O35381	Acidic leucine-rich nuclear phosphoprotein 32 family member A (Acidic nuclear phosphoprotein pp32) (Leucine-rich acidic nuclear protein) (LANP) (Potent heat-stable protein phosphatase 2A inhibitor I1PP2A)	Anp32a	4	328112	294745	381525	381824	472117	530787	403251	365919	392003	360521	529131	374405	469499	389325	522414	434914	409940	453238	510194	MOUSE
A2A5E1	DnaJ homolog subfamily C member 7	Dnajc7	6	155007	163372	192902	272020	213621	175482	191679	167965	176013	202863	222190	173407	177430	168333	227048	265901	224715	298708	322102	MOUSE
S4R189	Rho guanine nucleotide exchange factor 40	Arhgef40	1	14084.9	9064.76	16815.6	28174.5	20687.8	16455.9	18811.5	16138.4	9209.92	15627.9	24846.9	18692.4	20682.2	19130.8	23778.4	20231.8	15911.2	24042.6	23882.1	MOUSE
E9PYH2	Cytosolic acyl coenzyme A thioester hydrolase	Acot7	7	664361	684505	768028	1058789	1.19264e+06	1.1569e+06	945180	707004	754170	742741	912005	697836	596427	590372	810862	1286655	1.01021e+06	1.2188e+06	1.3615e+06	MOUSE
G5E8I8	Calcium homeostasis endoplasmic reticulum protein	Cherp	3	45930.7	32075.5	60257.3	121661	100060	113415	82980.7	58055.4	72248	101806	74938.5	101984	98972.1	120705	105055	119343	107459	110085	128816	MOUSE
Q3UKV0	Eukaryotic translation initiation factor 2B, subunit 3	Eif2b3	5	152232	216321	228078	385679	295819	199091	210595	212252	264249	254174	327374	236523	263061	243124	351036	199809	267854	306234	318076	MOUSE
Z4YKC4	Eukaryotic translation initiation factor 4 gamma 3	Eif4g3	3	30561.4	29641.5	33306	37916.9	31370.9	47338.5	41650.6	27118.5	22763	27606.3	37938.3	27973	34747.1	29367.9	21744.6	31363.9	34799.3	37114.1	46134.1	MOUSE
Q9QZM0	Ubiquilin-2 (Chap1) (DSK2 homolog) (Protein linking IAP with cytoskeleton 2) (PLIC-2) (Ubiquitin-like product Chap1/Dsk2)	Ubqln2	4	189403	189405	232809	253849	203259	239081	173064	188531	213899	202031	237117	235938	221970	180561	254438	228164	218364	261424	267200	MOUSE
Q64674	Spermidine synthase (SPDSY) (EC 2.5.1.16) (Putrescine aminopropyltransferase)	Srm	8	1.24437e+06	1.17047e+06	1.46038e+06	1981967	1.63686e+06	1.53593e+06	1.21737e+06	1.59927e+06	1.49531e+06	1.59671e+06	2.09788e+06	1.6802e+06	1.4246e+06	1.28173e+06	1909271	1.64836e+06	1.36619e+06	1.87679e+06	2.09715e+06	MOUSE
J3KMM1	Ubiquitin carboxyl-terminal hydrolase 19	Usp19	3	42135	48977.2	45601.5	49945.4	34538.6	59480.5	46272.4	42224	38362.3	47358.8	58088	50081.7	38975.6	39171.8	62333.7	60753.9	25167.4	53527.2	65711.1	MOUSE
A0A1L1STC6	Nesprin-1	Syne1	2	294652	290832	366182	56125.2	222331	373655	344946	255502	336555	352886	418408	283061	253573	325697	42576	25710.4	298683	104985	234437	MOUSE
P61087	Ubiquitin-conjugating enzyme E2 K (EC 2.3.2.23) (E2 ubiquitin-conjugating enzyme K) (Huntingtin-interacting protein 2) (HIP-2) (Ubiquitin carrier protein) (Ubiquitin-conjugating enzyme E2-25 kDa) (Ubiquitin-conjugating enzyme E2(25K)) (Ubiquitin-conjugating enzyme E2-25K) (Ubiquitin-protein ligase)	Ube2k	6	245260	247547	313168	389988	291644	245598	346218	305634	274805	305285	361051	338569	363119	310929	401906	334999	316936	417764	409925	MOUSE
Q61655	ATP-dependent RNA helicase DDX19A (EC 3.6.4.13) (DEAD box RNA helicase DEAD5) (mDEAD5) (DEAD box protein 19A) (Eukaryotic translation initiation factor 4A-related sequence 1)	Ddx19a	7	341278	312850	362085	389669	438608	362887	325809	304610	344419	340878	405834	360453	294572	265629	421204	452783	350042	387112	491018	MOUSE
F8WIR1	Cathepsin D (EC 3.4.23.5)	Ctsd	6	553820	510523	643357	780726	1.27694e+06	1.40065e+06	1.00343e+06	573272	552875	585244	693171	800140	688095	750507	943616	1.15502e+06	844866	864065	1.01768e+06	MOUSE
A0A0B4J1E2	SNW domain-containing protein 1	Snw1	5	137685	125702	133422	142341	143747	204677	122260	114087	158609	165728	136103	138726	147859	104122	129945	173429	167026	172208	144024	MOUSE
Q6P9R2	Serine/threonine-protein kinase OSR1 (EC 2.7.11.1) (Oxidative stress-responsive 1 protein)	Oxsr1	5	192274	196072	246003	430863	390096	400517	407490	320728	308531	258594	404859	254448	228387	213721	387239	375848	231248	486233	518082	MOUSE
Q9DCT2	NADH dehydrogenase [ubiquinone] iron-sulfur protein 3, mitochondrial (EC 7.1.1.2) (Complex I-30kD) (CI-30kD) (NADH-ubiquinone oxidoreductase 30 kDa subunit)	Ndufs3	6	313652	270336	375033	486567	688254	501724	547804	354149	288912	242895	254148	488659	345833	443873	505094	736071	484111	524704	675572	MOUSE
Q99LC3	NADH dehydrogenase [ubiquinone] 1 alpha subcomplex subunit 10, mitochondrial (Complex I-42kD) (CI-42kD) (NADH-ubiquinone oxidoreductase 42 kDa subunit)	Ndufa10	5	192551	150455	202312	200660	351854	302158	311514	135994	124973	105017	211573	245831	208908	214414	267505	340541	313032	366650	371397	MOUSE
Q91VE6	MKI67 FHA domain-interacting nucleolar phosphoprotein (Nucleolar protein interacting with the FHA domain of pKI-67) (mNIFK)	Nifk	3	133201	145369	173206	224310	176528	151980	139614	197428	193410	214507	253180	282038	214694	218374	281994	347872	233379	236380	277497	MOUSE
P28653	Biglycan (Bone/cartilage proteoglycan I) (PG-S1)	Bgn	5	223559	185506	220956	269376	376919	353621	349876	171981	171584	180914	206924	153707	183735	171998	209446	277928	209308	218762	226276	MOUSE
Q62376	U1 small nuclear ribonucleoprotein 70 kDa (U1 snRNP 70 kDa) (U1-70K) (snRNP70)	Snrnp70	7	356166	321293	397760	425833	383490	417644	499607	337061	343676	424768	455274	279362	387313	225858	420808	438590	438595	429287	471948	MOUSE
Q8BTS4	Nuclear pore complex protein Nup54 (54 kDa nucleoporin) (Nucleoporin Nup54)	Nup54	2	37059.7	37511.3	42711.2	23640.1	34336.3	13838.2	31885.7	37041.5	33251.5	59623.5	26803.2	66357.8	45291.7	49503.7	62750.2	76933.7	50972.7	27952.6	68637.2	MOUSE
P46638	Ras-related protein Rab-11B	Rab11b	6	699578	702297	765282	1026235	609090	621516	671402	732984	707480	803706	966350	670544	576112	618710	701580	612449	655779	686808	532199	MOUSE
Q60790	Ras GTPase-activating protein 3 (GAP1(IP4BP)) (GapIII) (Ins P4-binding protein)	Rasa3	3	22559.8	23313.8	35612.7	40166.9	36871.9	41416.3	36411.4	15073.3	22569.2	22237.2	16272.4	22801.3	30259.5	23064.6	39023.8	35566	79135.4	35762.8	100841	MOUSE
A0A494BB75	WD repeat-containing protein 26	Wdr26	3	45575.7	33944	53723	51328.1	50491.2	24744.5	41409.1	38169.9	33003.4	53472	57026.4	50396.2	47779.6	53550.1	70848.3	54962.3	54673.7	54660.3	57869.4	MOUSE
P70290	55 kDa erythrocyte membrane protein (p55) (Membrane protein, palmitoylated 1)	Mpp1	5	199138	205633	400297	285052	395588	335698	289724	351549	325918	198064	279697	390890	223164	381675	264025	316819	225572	523265	325358	MOUSE
Q8VE88	Protein FAM114A2	Fam114a2	3	95744.3	94490.9	93579.9	131002	146956	133722	143278	100832	124638	97236.5	90040.2	111050	60071.9	89424	127990	108341	107338	113244	142755	MOUSE
P99029	Peroxiredoxin-5, mitochondrial (EC 1.11.1.24) (Antioxidant enzyme B166) (AOEB166) (Liver tissue 2D-page spot 2D-0014IV) (PLP) (Peroxiredoxin V) (Prx-V) (Peroxisomal antioxidant enzyme) (Thioredoxin peroxidase PMP20) (Thioredoxin-dependent peroxiredoxin 5)	Prdx5	9	982454	807976	1.09022e+06	1.31633e+06	1.71428e+06	1.71748e+06	1.44198e+06	1.01721e+06	907607	1.10433e+06	1.27962e+06	1.33271e+06	1.08525e+06	1.07019e+06	1.44078e+06	1.75111e+06	1.44944e+06	1.77051e+06	1.93564e+06	MOUSE
O35435	Dihydroorotate dehydrogenase (quinone), mitochondrial (DHOdehase) (EC 1.3.5.2) (Dihydroorotate oxidase)	Dhodh	2	41857.4	37619.1	49670.6	74190.2	43103.9	40310.6	40679.1	40796.3	39525.5	33218.6	60812.8	63576.4	53352.9	51903.7	73364.8	93389.3	60315.2	81145.6	82885.4	MOUSE
A0A0R4J1E3	Drebrin	Dbn1	6	200471	169097	200961	214048	155159	161453	234865	119216	156854	145478	202050	236196	197603	179135	213589	159744	145171	197372	182406	MOUSE
Q3ULJ0	Glycerol-3-phosphate dehydrogenase 1-like protein (EC 1.1.1.8)	Gpd1l	2	42495.4	37057.8	50942.3	87535.3	82735.5	54625.3	71217.1	58323.5	39217.9	54769.1	81346.9	83780.1	65932.5	87940.3	68526	97751.1	78508.9	110867	113674	MOUSE
Q8K124	Pleckstrin homology domain-containing family O member 2 (PH domain-containing family O member 2) (Pleckstrin homology domain-containing family Q member 1) (PH domain-containing family Q member 1)	Plekho2	3	49872.5	52014.6	56300.5	79258.4	86300.1	59876.6	40821	50218.3	47435.9	70399.4	93596	44714.3	59931.4	57903.9	73715.9	53057.6	43066.2	59600.5	75811.1	MOUSE
E9QP49	EH domain-binding protein 1-like protein 1	Ehbp1l1	2	23187.2	20104.1	28926	30152.7	26520.8	16491.2	29891.6	21250.1	25560.5	25985.2	31341.8	22513.2	18783.3	22670.4	27876.8	24432.5	24829.9	32516	9093.69	MOUSE
A6PW84	Procollagen-proline 3-dioxygenase (EC 1.14.11.7)	P3h1	5	54436.6	57821.2	58878.2	81124.3	41583.8	69665.5	55718.2	47267.2	48174.3	38459.3	55137.9	45444.1	50663.7	47212.4	83644.6	76341.2	77986.8	86453.4	83851.4	MOUSE
D3YWF6	Ubiquitinyl hydrolase 1 (EC 3.4.19.12)	Otub1	8	368646	285547	417784	482890	518753	566102	447184	336618	373410	399035	499163	484223	412371	343676	555862	441096	385632	435379	409839	MOUSE
R4H4Y7	N-terminal kinase-like protein (SCY1-like 1 splice variant 13)	Scyl1	2	18864.6	30133.5	30524.6	36828.4	30871.2	33892	34107.7	26035.9	35697.4	31653.7	29228.7	15923.4	33009.3	22832	32218.9	15098.4	21284.3	35431.4	37593.8	MOUSE
E9PWG6	Non-SMC condensin I complex, subunit G	Ncapg	5	93925.9	78658.2	91164.5	124439	88745.3	64211.5	55800.9	105423	80543.1	102895	113333	78135.7	98433	79793.4	148491	116291	113106	139475	114079	MOUSE
P08030	Adenine phosphoribosyltransferase (APRT) (EC 2.4.2.7)	Aprt	8	1.42015e+06	1.29615e+06	1.84934e+06	2.282e+06	1.52409e+06	1.16503e+06	1.19263e+06	1.50025e+06	1.5662e+06	1.79253e+06	2.02879e+06	1.78974e+06	1.60575e+06	1.60514e+06	2.06754e+06	1.41289e+06	1.32768e+06	1.65172e+06	1.74083e+06	MOUSE
Q8K0C1	Importin-13 (Imp13)	Ipo13	3	45025.2	24064.2	70374.5	58306.4	46423	28207	46156.5	43941.1	58868.4	47498.3	56091.5	72199.8	66562	59410.2	37827.3	59324	38899.1	54956	69243.7	MOUSE
P35585	AP-1 complex subunit mu-1 (AP-mu chain family member mu1A) (Adaptor protein complex AP-1 subunit mu-1) (Adaptor-related protein complex 1 subunit mu-1) (Clathrin assembly protein complex 1 mu-1 medium chain 1) (Clathrin coat assembly protein AP47) (Clathrin coat-associated protein AP47) (Golgi adaptor HA1/AP1 adaptin mu-1 subunit) (Mu-adaptin 1) (Mu1A-adaptin)	Ap1m1	2	44391	50244	70270.4	79210.4	68462.6	57725.6	64799.8	42703.6	49821.1	56850.4	64836.5	63536.7	60664.4	53709.5	70724	67671.5	56729.9	81575.5	87370.2	MOUSE
Q8VD65	Phosphoinositide 3-kinase regulatory subunit 4 (PI3-kinase regulatory subunit 4) (EC 2.7.11.1)	Pik3r4	2	15685.7	18698.9	41097.8	50073.6	27892.9	20730.2	27624.2	20323.9	24471	28860.4	22009.8	13608.4	24623.9	22811.3	24295.1	28116.1	12820.4	32742.9	33198.4	MOUSE
Q9JKB1	Ubiquitin carboxyl-terminal hydrolase isozyme L3 (UCH-L3) (EC 3.4.19.12) (Ubiquitin thioesterase L3)	Uchl3	5	141970	194205	169084	228442	199530	210811	211840	128456	180575	189024	227545	193288	180410	168198	206578	166623	169832	206993	233977	MOUSE
Q9CPU0	Lactoylglutathione lyase (EC 4.4.1.5) (Aldoketomutase) (Glyoxalase I) (Glx I) (Ketone-aldehyde mutase) (Methylglyoxalase) (S-D-lactoylglutathione methylglyoxal lyase)	Glo1	6	936946	862880	1.20684e+06	1.2811e+06	1.38313e+06	1061958	1.23753e+06	1.26247e+06	1258919	1.36252e+06	1.45593e+06	1.1276e+06	1.06301e+06	1.00267e+06	1.28459e+06	1.0867e+06	1.08444e+06	1337157	1.39658e+06	MOUSE
Q8CHP8	Glycerol-3-phosphate phosphatase (G3PP) (EC 3.1.3.21) (Aspartate-based ubiquitous Mg(2+)-dependent phosphatase) (AUM) (EC 3.1.3.48) (Phosphoglycolate phosphatase) (PGP)	Pgp	6	129916	137902	169446	194727	176811	155482	148683	165964	166278	186445	191544	207873	180806	160219	230422	164645	171396	217784	226708	MOUSE
P58044	Isopentenyl-diphosphate Delta-isomerase 1 (EC 5.3.3.2) (Isopentenyl pyrophosphate isomerase 1) (IPP isomerase 1) (IPPI1)	Idi1	6	471308	421898	518837	688648	673341	521108	523225	653234	626241	614903	792769	789574	652417	669822	837541	410592	356967	431187	463008	MOUSE
Q9DBG5	Perilipin-3 (Cargo selection protein TIP47) (Mannose-6-phosphate receptor-binding protein 1)	Plin3	7	105699	87432.3	139187	194545	471423	444745	433801	181645	115730	209461	228912	67979.1	43903.9	54881.1	76469.8	312587	291469	297553	321566	MOUSE
Q9Z1J3	Cysteine desulfurase, mitochondrial (m-Nfs1) (EC 2.8.1.7)	Nfs1	5	130848	94699.2	147834	153606	93515.2	236595	124670	97304.2	205927	113281	146675	162828	174031	163758	207635	125278	143056	106107	103466	MOUSE
Q80UM7	Mannosyl-oligosaccharide glucosidase (EC 3.2.1.106) (Glucosidase 1) (Glycoprotein-processing glucosidase I)	Mogs	3	67537.1	59462	54184.7	86446.7	24354	31351.9	29633.2	68221.6	74734.9	83476.5	112753	24104	31857.3	51109.8	31658.5	19173.4	33686.6	28973.2	21774.7	MOUSE
Q8BGT5	Alanine aminotransferase 2 (ALT2) (EC 2.6.1.2) (Glutamate pyruvate transaminase 2) (GPT 2) (Glutamic--alanine transaminase 2) (Glutamic--pyruvic transaminase 2)	Gpt2	5	92008.1	118138	119405	149111	76895.5	63053.2	51865.1	139905	129230	150430	162159	115831	91784.1	108279	114131	75191.2	52936.9	98077.9	92835.8	MOUSE
Q8BVI4	Dihydropteridine reductase (EC 1.5.1.34) (HDHPR) (Quinoid dihydropteridine reductase)	Qdpr	3	123351	104647	142130	160791	165920	177948	139034	136698	76032.8	140754	177449	167209	147805	126031	117795	143183	129888	160445	181828	MOUSE
Q9D0B0	Serine/arginine-rich splicing factor 9 (Splicing factor, arginine/serine-rich 9)	Srsf9	4	81832.1	99353.6	134177	167258	171110	155609	134529	71758.2	121782	126140	121016	198384	166498	141542	229176	256104	128177	196457	219613	MOUSE
A0A0A6YX18	V-type proton ATPase subunit H	Atp6v1h	7	249489	187980	256118	309014	351029	306657	330270	206161	215665	300533	294907	298789	286365	222846	302930	325886	259188	348396	335072	MOUSE
P55302	Alpha-2-macroglobulin receptor-associated protein (Alpha-2-MRAP) (Heparin-binding protein 44) (HBP-44) (Low density lipoprotein receptor-related protein-associated protein 1) (RAP)	Lrpap1	2	76628.7	56015.4	80003.1	97394.3	95016.9	64209.9	120717	62574.6	66326.5	76977.6	82499.4	99357.4	91644.8	107740	131176	112628	77318.7	148910	101121	MOUSE
O35130	Ribosomal RNA small subunit methyltransferase NEP1 (EC 2.1.1.-) (18S rRNA (pseudouridine(1248)-N1)-methyltransferase) (18S rRNA Psi1248 methyltransferase) (Nucleolar protein EMG1 homolog) (Protein C2f) (Ribosome biogenesis protein NEP1)	Emg1	6	225565	169229	180710	235992	266845	203066	240916	218495	271414	290585	330236	275578	206532	209460	184905	258835	242204	264336	289454	MOUSE
Q61249	Immunoglobulin-binding protein 1 (Alpha4 phosphoprotein) (CD79a-binding protein 1) (Lymphocyte signal transduction molecule alpha 4) (Protein phosphatase 2/4/6 regulatory subunit) (p52)	Igbp1	5	158051	83702.5	163127	209028	192735	99519	178716	182273	164595	172273	139336	124960	156469	145446	169877	198910	166391	246861	229697	MOUSE
P05480	Neuronal proto-oncogene tyrosine-protein kinase Src (EC 2.7.10.2) (Proto-oncogene c-Src) (pp60c-src) (p60-Src)	Src	2	48849.3	54400.4	87360.1	68775.6	68604.7	61044.5	69394.9	51825	62359.2	61386.6	68363.9	83289.6	111476	63921.7	104310	51805.7	49428.1	90175.4	71578.4	MOUSE
E9QKR0	Guanine nucleotide-binding protein G(I)/G(S)/G(T) subunit beta-2	Gnb2	3	63397.9	50742.5	78201.3	124080	142109	153739	120722	111069	44117.4	92253.7	103951	136273	135775	160597	160059	147755	114917	156371	79165.8	MOUSE
Q3TCD4	Enoyl-CoA delta isomerase 2	Eci2	5	144681	105879	179504	177559	204942	132072	128998	136053	61185.8	116974	181402	117878	175603	169313	83792.7	109631	142975	211938	188465	MOUSE
Q3TWW8	Serine/arginine-rich splicing factor 6 (Pre-mRNA-splicing factor SRP55) (Splicing factor, arginine/serine-rich 6)	Srsf6	5	175470	154443	186649	192425	242224	282907	200478	92942.9	158071	176527	187836	257826	232041	211450	242935	325770	285465	316673	282705	MOUSE
A2AMY5	Ubiquitin-associated protein 2	Ubap2	6	176944	191682	221572	278156	170835	180256	164556	164731	174311	192190	218893	165413	171033	152474	212286	172027	167888	210225	215152	MOUSE
Q99KR3	Endoribonuclease LACTB2 (Beta-lactamase-like protein 2) (EC 3.1.27.-)	Lactb2	3	78637	84335.8	88345.5	106258	65350.5	74218.4	68439.8	73851.8	80618.1	74651.1	98131.6	57155.4	54734.4	46467.9	65731.1	49608.7	45766.5	59263.3	46477.9	MOUSE
Q8BFZ9	Erlin-2 (Endoplasmic reticulum lipid raft-associated protein 2) (Stomatin-prohibitin-flotillin-HflC/K domain-containing protein 2) (SPFH domain-containing protein 2)	Erlin2	3	117904	119292	142487	156941	155573	148550	141809	123820	110357	131154	151867	175986	159592	159600	185238	189682	147185	129606	166032	MOUSE
Q91YK2	Ribosomal RNA processing protein 1 homolog B (RRP1-like protein B)	Rrp1b	4	25520.8	22274.5	31797.3	37929.1	29460.3	32580.9	29169	29051.6	33492.7	41432	36890.6	37439.8	41676.9	31332.2	46952.6	35919.7	40018.4	34841.8	45165.5	MOUSE
P55264	Adenosine kinase (AK) (EC 2.7.1.20) (Adenosine 5'-phosphotransferase)	Adk	3	141231	106532	173658	180413	222463	82085.4	199994	157766	134643	186811	196744	166494	144894	150011	183710	154161	142987	165623	185987	MOUSE
Q543K9	Purine nucleoside phosphorylase (EC 2.4.2.1) (Inosine-guanosine phosphorylase)	Pnp	6	317317	255363	363171	496225	489172	422615	406015	269087	329128	377656	495667	477106	363042	374514	499067	393397	307038	418789	482719	MOUSE
Q99N94	39S ribosomal protein L9, mitochondrial (L9mt) (MRP-L9)	Mrpl9	4	96001.5	68781.7	123959	123219	103587	103213	83661.3	113252	102531	117468	134679	102367	73516.2	91934	94719.2	98784.9	90370.8	93757.6	90147.9	MOUSE
B1AZI6	THO complex subunit 2 (Tho2)	Thoc2	4	140915	96332.9	157630	191521	105712	122090	124788	138336	137576	157969	198112	116583	113120	76652.2	141465	137171	115938	135993	133565	MOUSE
Q8BYK6	YTH domain-containing family protein 3	Ythdf3	2	80074.4	36748	53547.8	30901.8	43565.4	68628.7	45160.9	46428	40813.8	34741.1	56676.3	38103.2	19801.2	105780	48750.6	31997.5	47785.2	35674.3	35663.6	MOUSE
P47809	Dual specificity mitogen-activated protein kinase kinase 4 (MAP kinase kinase 4) (MAPKK 4) (EC 2.7.12.2) (C-JUN N-terminal kinase kinase 1) (JNK kinase 1) (JNKK 1) (JNK-activating kinase 1) (MAPK/ERK kinase 4) (MEK 4) (SAPK/ERK kinase 1) (SEK1)	Map2k4	7	106404	92067.6	164984	154435	117913	128425	71779.5	111130	122685	120609	147416	109742	97938.9	113538	118858	157808	114584	127516	159568	MOUSE
O88543	COP9 signalosome complex subunit 3 (SGN3) (Signalosome subunit 3) (JAB1-containing signalosome subunit 3)	Cops3	6	300334	275863	299403	308314	421740	418088	419037	232827	282441	303511	271915	329609	262550	250359	314913	378755	284229	499466	362525	MOUSE
Q61136	Serine/threonine-protein kinase PRP4 homolog (EC 2.7.11.1) (PRP4 pre-mRNA-processing factor 4 homolog) (Pre-mRNA protein kinase)	Prpf4b	3	29376.9	31990.7	49950.3	35261.2	62902.9	45946.1	20835.9	41598.4	61459.9	54397.7	61508.6	79070	63989.4	32879.9	43144.8	73832	60767.8	68085.2	79259.7	MOUSE
P97770	THUMP domain-containing protein 3 (GtROSA26asSor)	Thumpd3	2	47845.5	29454.3	61938.3	37592.9	68028.9	45641.9	49186.5	59492.1	44622.6	63838.2	55597	61163.7	51953.8	37465.9	48228.6	63334.3	56500.8	46062.9	57915.4	MOUSE
P70677	Caspase-3 (CASP-3) (EC 3.4.22.56) (Apopain) (Cysteine protease CPP32) (CPP-32) (LICE) (Protein Yama) (SREBP cleavage activity 1) (SCA-1) [Cleaved into: Caspase-3 subunit p17;Caspase-3 subunit p12]	Casp3	6	402050	378549	433048	459268	442966	502360	453978	321629	355851	228976	420913	280900	288945	328458	465120	264343	370103	557147	447408	MOUSE
Q9QYE6	Golgin subfamily A member 5 (Golgin-84) (Protein Ret-II) (Protein Sumiko)	Golga5	1	13085.9	7194.79	12795.5	13216.1	14418.9	16239.3	12210.9	10168.2	8861.43	14476.4	10547.6	14819.9	12078.2	10281.1	13796.6	17769.4	14998.1	14350.9	29177.9	MOUSE
Q61171	Peroxiredoxin-2 (EC 1.11.1.24) (Thiol-specific antioxidant protein) (TSA) (Thioredoxin peroxidase 1) (Thioredoxin-dependent peroxide reductase 1) (Thioredoxin-dependent peroxiredoxin 2)	Prdx2	6	1.85922e+06	1.50911e+06	2.03707e+06	2.61692e+06	2860705	2.19548e+06	2.15957e+06	2.1212e+06	1.84784e+06	2097266	2.5172e+06	2.9462e+06	2.3145e+06	2.29166e+06	3019081	2.85716e+06	2.19341e+06	2.88605e+06	3143950	MOUSE
Q91VK1	Basic leucine zipper and W2 domain-containing protein 2	Bzw2	3	158297	129097	168359	241005	200148	166366	169909	196284	188813	202908	263216	205878	184745	177115	221776	193838	156950	227042	242664	MOUSE
Q99LP6	GrpE protein homolog 1, mitochondrial (Mt-GrpE#1)	Grpel1	5	440001	444780	503925	579698	498550	470127	464491	477662	470618	505211	533344	739485	642585	599746	795121	830287	716161	681812	696463	MOUSE
Q8BVG4	Dipeptidyl peptidase 9 (DP9) (EC 3.4.14.5) (Dipeptidyl peptidase IX) (DPP IX) (Dipeptidyl peptidase-like protein 9) (DPLP9)	Dpp9	4	99636.7	54454.4	106265	133044	172758	108567	130122	115393	109140	132652	98759.5	142808	110903	113079	158601	122451	105225	143940	107516	MOUSE
Q9DBL7	Bifunctional coenzyme A synthase (CoA synthase) [Includes: Phosphopantetheine adenylyltransferase (EC 2.7.7.3) (Dephospho-CoA pyrophosphorylase) (Pantetheine-phosphate adenylyltransferase) (PPAT);Dephospho-CoA kinase (DPCK) (EC 2.7.1.24) (Dephosphocoenzyme A kinase) (DPCOAK)]	Coasy	4	115242	87195	126162	164531	172602	102918	144221	96074.3	94641	118977	141288	148319	123730	109670	148269	171856	166451	210204	228518	MOUSE
P36552	Oxygen-dependent coproporphyrinogen-III oxidase, mitochondrial (COX) (Coprogen oxidase) (Coproporphyrinogenase) (EC 1.3.3.3)	Cpox	6	248871	240411	346856	469911	316259	230996	290322	345366	274537	284917	422703	337982	319955	387676	504784	430360	254316	364979	319191	MOUSE
Q922Q8	Leucine-rich repeat-containing protein 59 [Cleaved into: Leucine-rich repeat-containing protein 59, N-terminally processed]	Lrrc59	7	1.70759e+06	1.44395e+06	1818644	2.29904e+06	511194	706601	615112	1.29783e+06	1.2954e+06	1.59944e+06	1990230	509116	810082	941025	872983	486706	596452	1.03374e+06	389292	MOUSE
Z4YKV1	Guanine nucleotide-binding protein G(s) subunit alpha isoforms short	Gnas	7	265702	294168	284210	437048	380871	286919	290741	295690	252727	298166	313703	287672	275262	340292	344882	255595	285432	261289	260105	MOUSE
P35282	Ras-related protein Rab-21 (Rab-12)	Rab21	4	200553	214480	245668	324061	183485	189459	191926	200565	175077	196519	232721	153444	151077	147182	200895	175903	180531	190026	168537	MOUSE
P18155	Bifunctional methylenetetrahydrofolate dehydrogenase/cyclohydrolase, mitochondrial [Includes: NAD-dependent methylenetetrahydrofolate dehydrogenase (EC 1.5.1.15);Methenyltetrahydrofolate cyclohydrolase (EC 3.5.4.9)]	Mthfd2	4	154317	161760	177972	239962	208642	153959	123843	224245	226994	237162	281244	242900	200620	192776	256154	280847	202787	210483	211913	MOUSE
D3YUP1	Coactivator-associated arginine methyltransferase 1 (EC 2.1.1.319) (Histone-arginine methyltransferase CARM1) (Protein arginine N-methyltransferase 4)	Carm1	1	42505.4	39671.4	48628.8	71403.8	38591.7	27245.2	33719.7	49916	47552.2	55262.3	67499.9	57244	54161.7	48840.7	61103.1	66405.5	45535.3	64942.9	65629.7	MOUSE
B2RXT3	Ogdhl protein (Oxoglutarate dehydrogenase-like)	Ogdhl	1	10599	7206.37	10994.1	11442.9	8688.99	8092.3	544.633	6631.37	8194.67	9025.9	9728.37	9458.66	1895.84	4520.07	9886.79	6351.48	9082.8	6660.35	10192.7	MOUSE
B2M1R7	Poly(rC)-binding protein 2	Pcbp2	1	1662.4	17954.3	26100	22984.3	35147.5	16993.1	20148.6	20623.5	23786.3	2182.24	30861.9	33002.2	24337.4	22650.4	34538.5	32232.5	24845.8	31174.3	37392	MOUSE
Q9WUR9	Adenylate kinase 4, mitochondrial (AK 4) (EC 2.7.4.10) (EC 2.7.4.6) (Adenylate kinase 3-like) (Adenylate kinase isoenzyme 4) (GTP:AMP phosphotransferase AK4)	Ak4	5	101493	92938	105595	128622	302541	292960	253169	85138.2	87047.1	99921.6	91603.6	145664	143192	120426	215133	179418	180429	190986	179109	MOUSE
A0A1W2P7Q9	Myosin light polypeptide 6	Myl6	6	5.44882e+06	4774201	6.19108e+06	6.91079e+06	5601575	4.94972e+06	5160096	5.42241e+06	5268301	5.9267e+06	6369671	5371493	5029938	4473878	5.8985e+06	4920744	4688178	5681024	5.95358e+06	MOUSE
A0A1W2P6P1	Small glutamine-rich tetratricopeptide repeat-containing protein alpha (Fragment)	Sgta	7	475744	384095	575431	650261	743762	302055	596459	489048	503858	510015	589454	641447	552279	503916	657192	588777	507607	648406	647454	MOUSE
Q99LN9	Deoxyhypusine hydroxylase (DOHH) (EC 1.14.99.29) (Deoxyhypusine dioxygenase) (Deoxyhypusine monooxygenase)	Dohh	3	114671	103480	144506	195545	147294	130225	131417	163455	142034	138860	165770	162761	139869	135708	152499	175613	135082	186585	200696	MOUSE
Q62433	Protein NDRG1 (N-myc downstream-regulated gene 1 protein) (Protein Ndr1)	Ndrg1	8	717714	640995	846175	954040	958878	836684	781736	679918	629289	803122	878806	499887	531025	432394	667118	574715	475624	636035	695024	MOUSE
Q9R1J0	Sterol-4-alpha-carboxylate 3-dehydrogenase, decarboxylating (EC 1.1.1.170)	Nsdhl	5	347894	317704	470571	503902	310116	355888	324006	398295	448239	469819	591817	393094	304253	408925	435168	156884	190567	251769	216122	MOUSE
Q7TNP2	Serine/threonine-protein phosphatase 2A 65 kDa regulatory subunit A beta isoform (PP2A subunit A isoform PR65-beta) (PP2A subunit A isoform R1-beta)	Ppp2r1b	8	218319	220900	261822	303731	294802	260329	284911	190540	239241	227619	323856	283301	273164	272837	336374	307461	196105	316038	269830	MOUSE
P97930	Thymidylate kinase (EC 2.7.4.9) (dTMP kinase)	Dtymk	5	147634	129719	243772	324132	352898	371745	287801	131202	250973	243954	228412	374144	351376	297980	332089	385724	313618	400465	376292	MOUSE
Q01279	Epidermal growth factor receptor (EC 2.7.10.1)	Egfr	1	4929.97	14367.4	15680.1	21923.2	14982.6	7802.04	6444.1	3360.38	5809.96	6190.19	5149.5	23685.4	18716.1	22965.3	27307.3	25364.2	20969.5	28077.7	26570.2	MOUSE
P32020	Sterol carrier protein 2 (SCP-2) (Acetyl-CoA C-myristoyltransferase) (EC 2.3.1.155) (Non-specific lipid-transfer protein) (NSL-TP) (Propanoyl-CoA C-acyltransferase) (EC 2.3.1.176) (SCP-2/3-oxoacyl-CoA thiolase) (SCP-2/thiolase) (EC 2.3.1.16) (SCP-chi) (Sterol carrier protein X) (SCP-X) (Straight-chain acyl-CoA oxidase) (SCPX)	Scp2	8	410553	354134	508957	540111	2.5128e+06	2.64813e+06	2.33174e+06	395216	361110	414390	487160	530216	497782	463511	594663	689933	562154	645449	658905	MOUSE
A0A5F8MPN7	Queuine tRNA-ribosyltransferase accessory subunit 2 (Queuine tRNA-ribosyltransferase domain-containing protein 1)	Qtrt2	3	56336.6	62425.1	68011.8	118652	63486.1	64346.5	31167.4	88378.7	71049.1	77080.8	108716	91602.3	82411.2	91017.3	103118	64563.7	59478.9	84386.5	96209.8	MOUSE
P54923	[Protein ADP-ribosylarginine] hydrolase (ADP-ribosylarginine hydrolase) (EC 3.2.2.19) (ADP-ribose-L-arginine cleaving enzyme)	Adprh	6	314825	255434	338288	416426	354834	386706	318411	287089	275615	327618	385198	335679	301669	429828	385463	301758	253189	336834	320256	MOUSE
Q63844	Mitogen-activated protein kinase 3 (MAP kinase 3) (MAPK 3) (EC 2.7.11.24) (ERT2) (Extracellular signal-regulated kinase 1) (ERK-1) (Insulin-stimulated MAP2 kinase) (MAP kinase isoform p44) (p44-MAPK) (MNK1) (Microtubule-associated protein 2 kinase) (p44-ERK1)	Mapk3	7	330445	300940	356419	998230	1.1407e+06	1.13489e+06	994535	905806	297476	1.0508e+06	1.08553e+06	1.20106e+06	1.07192e+06	1.03475e+06	1.41353e+06	1.16499e+06	889298	1.02787e+06	1093109	MOUSE
P61982	14-3-3 protein gamma [Cleaved into: 14-3-3 protein gamma, N-terminally processed]	Ywhag	4	574244	315349	652925	668045	572803	612553	624145	577707	620122	598321	626392	602304	560483	467744	647247	703377	642967	718615	708713	MOUSE
Q91XV3	Brain acid soluble protein 1 (22 kDa neuronal tissue-enriched acidic protein) (Neuronal axonal membrane protein NAP-22)	Basp1	7	395831	383001	353994	437452	137012	191082	184257	285855	310262	333328	339458	236185	196516	204134	215241	108184	102612	141953	99279.5	MOUSE
P35278	Ras-related protein Rab-5C	Rab5c	6	295432	285644	251151	442845	198225	145464	268533	197540	281482	325716	343346	210334	200322	157089	158369	277273	340048	347737	265420	MOUSE
Q9CQ62	2,4-dienoyl-CoA reductase [(3E)-enoyl-CoA-producing], mitochondrial (EC 1.3.1.124) (2,4-dienoyl-CoA reductase [NADPH]) (4-enoyl-CoA reductase [NADPH])	Decr1	6	366639	251135	605402	423220	1068042	529509	919346	634534	258645	314798	727766	783865	354340	699422	910147	713258	541189	287358	359441	MOUSE
P16045	Galectin-1 (Gal-1) (14 kDa lectin) (Beta-galactoside-binding lectin L-14-I) (Galaptin) (Lactose-binding lectin 1) (Lectin galactoside-binding soluble 1) (S-Lac lectin 1)	Lgals1	3	3343336	3111503	3913763	4.28485e+06	5.01717e+06	5627940	4556333	4455553	3.93624e+06	4002873	4534605	4.02285e+06	3.18708e+06	3150463	4.08644e+06	5.37463e+06	4228409	5309125	5.69665e+06	MOUSE
Q8VEJ4	Notchless protein homolog 1	Nle1	5	97048.7	72804.2	115106	127287	98479.1	107225	122506	125033	111741	100433	137449	114641	84802.6	127647	136977	113295	116551	159770	157698	MOUSE
Q9D0R4	Probable ATP-dependent RNA helicase DDX56 (EC 3.6.4.13) (ATP-dependent 61 kDa nucleolar RNA helicase) (DEAD box protein 56)	Ddx56	3	70243.1	84596.6	68414.4	118456	93684.3	73134.3	73722	74254.8	88949	101417	88358.4	115340	122921	109372	133132	128844	112183	114295	114022	MOUSE
Q91WM3	U3 small nucleolar RNA-interacting protein 2 (RRP9 homolog) (U3 small nucleolar ribonucleoprotein-associated 55 kDa protein) (U3 snoRNP-associated 55 kDa protein) (U3-55K)	Rrp9	5	189868	198652	233669	319776	154323	210563	184550	222659	247084	271259	326968	183717	186966	152655	231760	230274	190643	225041	211165	MOUSE
Q3UYU2	tRNA (uracil-5-)-methyltransferase homolog A	Trmt2a	4	505425	491165	603890	779629	710780	659122	621270	552915	597427	660907	770584	693617	621785	604907	811579	853640	681733	793493	879669	MOUSE
Q8CCK0	Core histone macro-H2A.2 (Histone macroH2A2) (mH2A2)	Macroh2a2	4	167073	126454	172609	200899	188685	243559	172409	119798	141293	179664	182831	183642	200873	170187	219433	168284	130557	162766	158807	MOUSE
G5E8J3	WD repeat-containing protein 11	Wdr11	2	18154.2	10306.8	22368.1	27560	24948.5	2905.16	30088.8	13835.5	19864.1	15389.4	19525.8	13499	20656.4	17835.2	19614.8	18516.1	10308.2	26417	26706.7	MOUSE
Q9DBL1	Short/branched chain specific acyl-CoA dehydrogenase, mitochondrial (SBCAD) (EC 1.3.8.5) (2-methyl branched chain acyl-CoA dehydrogenase) (2-MEBCAD) (2-methylbutyryl-coenzyme A dehydrogenase) (2-methylbutyryl-CoA dehydrogenase)	Acadsb	4	112344	98196.3	120353	123255	203593	240359	220426	155131	151888	173984	181904	248881	153891	168064	202013	176649	150849	152490	159272	MOUSE
Q11136	Xaa-Pro dipeptidase (X-Pro dipeptidase) (EC 3.4.13.9) (Imidodipeptidase) (Peptidase 4) (Peptidase D) (Proline dipeptidase) (Prolidase)	Pepd	5	116112	90997.1	136341	164681	145648	160030	115325	148250	133157	136950	160283	147673	112894	119879	169044	129869	114021	159007	163185	MOUSE
Q8VEH5	EPM2A-interacting protein 1 (Laforin-interacting protein)	Epm2aip1	5	101886	76237.6	100911	110847	119057	97362.2	117100	80940.5	76001.6	86777.5	60853.8	137506	103690	99076.1	138517	136169	109329	126656	118866	MOUSE
Q8R164	Valacyclovir hydrolase (VACVase) (Valacyclovirase) (EC 3.1.-.-) (Biphenyl hydrolase-like protein)	Bphl	4	113309	117127	189771	246686	262485	259201	203292	158988	158442	173064	241557	182483	116208	126617	268440	138756	151546	200230	131217	MOUSE
Q9WTX8	Mitotic spindle assembly checkpoint protein MAD1 (Mitotic arrest deficient 1-like protein 1) (MAD1-like protein 1)	Mad1l1	3	23022.4	22785.9	22771.3	26483.7	20599	26453.3	21125.1	18698	17746.1	20965.3	27001.2	33652.2	33423.8	26473.3	37725.6	35766.1	37384.7	38530.9	28602.4	MOUSE
P57716	Nicastrin	Ncstn	4	287283	238461	311702	436702	292935	342863	277259	283692	305910	341696	402572	281157	234464	258220	326845	286929	195654	270621	239983	MOUSE
O88796	Ribonuclease P protein subunit p30 (RNaseP protein p30) (EC 3.1.26.5) (RNase P subunit 2)	Rpp30	3	84011.6	73969.7	106942	146006	131067	57292.9	124787	106072	102420	126083	154642	130071	129964	123067	157078	151048	106707	128794	139919	MOUSE
Q8CBB6	Histone H2B	H2bc24	2	14023356	12206413	15445203	16641627	18799286	12512645	16411769	15539692	14509382	16270323	16558069	18765376	16261759	16925932	18109740	22290180	17193266	17994208	19398918	MOUSE
P19157	Glutathione S-transferase P 1 (Gst P1) (EC 2.5.1.18) (GST YF-YF) (GST class-pi) (GST-piB) (Preadipocyte growth factor)	Gstp1	5	1.58577e+06	1.33142e+06	1.73871e+06	2.07714e+06	2.49059e+06	2.164e+06	1.97431e+06	1917985	1697009	2.07058e+06	2.36765e+06	2.03776e+06	1786220	1.64673e+06	2209124	2.24848e+06	1.9472e+06	2539588	2.72275e+06	MOUSE
Q9CZR8	Elongation factor Ts, mitochondrial (EF-Ts) (EF-TsMt)	Tsfm	3	60066	36253.4	86076.3	63330.8	66128	53776.6	34181.3	81457.7	56353.6	76631.6	79760.7	80778.2	64080.5	55767.5	102121	59258.2	68201.8	88771.1	50659.8	MOUSE
Q6P1F6	Serine/threonine-protein phosphatase 2A 55 kDa regulatory subunit B alpha isoform (PP2A subunit B isoform B55-alpha) (PP2A subunit B isoform PR55-alpha) (PP2A subunit B isoform R2-alpha) (PP2A subunit B isoform alpha)	Ppp2r2a	4	129448	128372	158296	166802	154434	123611	155467	132041	142200	148377	174129	102656	129585	90412.7	160262	132966	140855	168650	132217	MOUSE
Q8VE47	Ubiquitin-like modifier-activating enzyme 5 (Ubiquitin-activating enzyme 5) (UFM1-activating enzyme)	Uba5	5	314427	319216	371624	425536	428703	416041	490575	334120	290783	332439	402638	325478	334352	283148	382627	354278	306790	345966	404392	MOUSE
P84096	Rho-related GTP-binding protein RhoG (Sid 10750)	Rhog	2	32284.3	36138.8	35323.7	36455.9	18019.6	19748	26862.9	27161.7	25811.8	27773.9	32473.7	19695	20378.5	22147.8	21037.2	19411.3	26113.2	30793.5	19773.8	MOUSE
Q80UW8	DNA-directed RNA polymerases I, II, and III subunit RPABC1 (RNA polymerases I, II, and III subunit ABC1) (DNA-directed RNA polymerase II subunit E) (RPB5 homolog)	Polr2e	5	189225	176655	206646	253778	215765	273961	207638	204623	204337	200188	207753	262241	275912	189907	262009	328698	257568	276977	293364	MOUSE
Q9D338	39S ribosomal protein L19, mitochondrial (L19mt) (MRP-L19)	Mrpl19	2	76026.1	33082.7	84201.4	89318.7	71327.6	90365.5	87478.8	73556.5	38924.4	51752.9	82761.5	81545.4	56669.5	74587.8	47843.3	76380.4	83131.1	93427.5	84918.5	MOUSE
D3YZD0	Splicing factor 1	Sf1	6	327641	310315	388257	441924	393672	305869	433185	320807	373342	391474	440966	390080	456243	269190	463583	505884	398955	589186	482241	MOUSE
A2AI52	Ubiquitin carboxyl-terminal hydrolase 8	Usp8	2	28834.7	21310.4	32728.7	38923.4	36748	33190.2	30534.1	21318.9	22555.3	31727.5	37714.7	29449.2	20820.8	35369.3	41269.7	27374.8	22708.7	43712.9	35290.5	MOUSE
Q9WUP7	Ubiquitin carboxyl-terminal hydrolase isozyme L5 (UCH-L5) (EC 3.4.19.12) (Ubiquitin C-terminal hydrolase UCH37) (Ubiquitin thioesterase L5)	Uchl5	7	311757	327308	406533	591860	573904	598528	479836	454527	395427	415997	536705	475196	469180	432471	476183	673978	484715	600239	656724	MOUSE
Q8CI33	CWF19-like protein 1	Cwf19l1	3	75342.8	75708.3	91060.2	87581.2	79721.9	96075.2	80921.9	72423.1	85050.1	89864.1	107885	73782.6	87820.7	66241.5	97064.2	81526.8	85467.5	110846	101956	MOUSE
Q05816	Fatty acid-binding protein 5 (Epidermal-type fatty acid-binding protein) (E-FABP) (Fatty acid-binding protein, epidermal) (Keratinocyte lipid-binding protein) (Psoriasis-associated fatty acid-binding protein homolog) (PA-FABP)	Fabp5	9	971684	1.1002e+06	1.2649e+06	1.72767e+06	727462	867548	606564	1.35255e+06	1.52024e+06	1.20849e+06	1.68388e+06	1.33026e+06	1.12309e+06	1.04215e+06	1555247	1.00739e+06	815021	1.05537e+06	1.20612e+06	MOUSE
Q9DBG7	Signal recognition particle receptor subunit alpha (SR-alpha) (Docking protein alpha) (DP-alpha)	Srpra	6	216258	229873	303441	360264	122053	113702	138135	215827	224119	258628	315141	156865	197485	204672	178188	151968	136166	198569	157097	MOUSE
Q99LB2	Dehydrogenase/reductase SDR family member 4 (EC 1.1.1.184) (NADPH-dependent carbonyl reductase/NADP-retinol dehydrogenase) (CR) (PHCR) (NADPH-dependent retinol dehydrogenase/reductase) (NDRD) (mouNRDR) (Peroxisomal short-chain alcohol dehydrogenase) (PSCD)	Dhrs4	4	79018.7	63918.9	105321	120987	159903	97686.8	136007	61827.7	54035.5	94685.3	114292	114231	114314	78637.6	130047	153461	117388	146990	153269	MOUSE
Q60676	Serine/threonine-protein phosphatase 5 (PP5) (EC 3.1.3.16) (Protein phosphatase T) (PPT)	Ppp5c	3	93485.8	87892.6	85873.1	107859	121884	79149.6	104219	94254.9	86289.1	97089.4	105602	96281.2	94468.8	94725.4	105272	105893	80661.1	136559	114837	MOUSE
Q8VC30	Triokinase/FMN cyclase (Bifunctional ATP-dependent dihydroxyacetone kinase/FAD-AMP lyase (cyclizing)) [Includes: ATP-dependent dihydroxyacetone kinase (DHA kinase) (EC 2.7.1.28) (EC 2.7.1.29) (Glycerone kinase) (Triokinase) (Triose kinase);FAD-AMP lyase (cyclizing) (EC 4.6.1.15) (FAD-AMP lyase (cyclic FMN forming)) (FMN cyclase)]	Tkfc	6	114825	105017	147159	160289	287709	267686	216015	128693	94338.8	116179	133079	165838	153854	129856	186710	201256	162576	196066	216553	MOUSE
Q8C570	mRNA export factor (Rae1 protein homolog) (mRNA-associated protein mrnp 41)	Rae1	3	58589.8	51528.7	70204.2	85676	77456.4	78859.5	67373	62599.8	59262.6	70243.6	77087.3	92507.7	78392	80121.8	111465	114924	81140.9	92493.4	91545.4	MOUSE
P55096	ATP-binding cassette sub-family D member 3 (68 kDa peroxisomal membrane protein) (PMP68) (70 kDa peroxisomal membrane protein) (PMP70)	Abcd3	2	78796.9	65789.1	106251	138538	127858	73457.9	105519	95512.2	83576.5	96834.2	122750	114536	101831	114683	129007	124742	99234.5	130829	113526	MOUSE
P47941	Crk-like protein	Crkl	6	192909	154012	198499	266506	247202	202776	198223	192846	179191	208223	270033	226553	195532	214148	261711	232313	196236	239382	268429	MOUSE
E9Q5W5	Zinc finger ZZ-type and EF-hand domain-containing protein 1	Zzef1	3	26819.8	20777.3	15755.3	40681.9	12211.7	13906.3	26909.9	26533	23670.5	23407	48070.8	12367.6	23056.7	17093.2	13081.2	24736.8	11776.2	29178.4	15237.4	MOUSE
Q9CQT1	Methylthioribose-1-phosphate isomerase (M1Pi) (MTR-1-P isomerase) (EC 5.3.1.23) (S-methyl-5-thioribose-1-phosphate isomerase) (Translation initiation factor eIF-2B subunit alpha/beta/delta-like protein)	Mri1	3	19370.3	24558.3	31856.2	31962.8	41693.4	56479.3	54965.5	19597.4	37833.1	27172.6	39823.6	21127.9	52211.9	44440.5	66480.7	60664.4	53974.3	48996.1	47365.4	MOUSE
Q3UID0	SWI/SNF complex subunit SMARCC2	Smarcc2	1	23249.1	18899.3	23357.1	31718	32213.3	26210.7	34030.7	19599.2	23157.8	27219.6	27311.6	26194.6	14520.2	28324.8	34740.6	32288.1	25306	28979.9	30945.9	MOUSE
P62983	Ubiquitin-40S ribosomal protein S27a (Ubiquitin carboxyl extension protein 80) [Cleaved into: Ubiquitin;40S ribosomal protein S27a]	Rps27a	3	755620	979160	1.04594e+06	1.15005e+06	821075	1.13475e+06	874099	1.09846e+06	1.06308e+06	1.4381e+06	1.64592e+06	853407	1.15405e+06	856060	1.05579e+06	1196829	900926	1.13162e+06	1.2082e+06	MOUSE
Q62419	Endophilin-A2 (Endophilin-2) (SH3 domain protein 2B) (SH3 domain-containing GRB2-like protein 1) (SH3p8)	Sh3gl1	4	204389	189438	248099	279455	328422	316330	298046	236986	225869	243163	276089	265823	242137	236131	298971	246251	227920	287125	303898	MOUSE
Q8R3V5	Endophilin-B2 (SH3 domain-containing GRB2-like protein B2)	Sh3glb2	2	21245.9	11847.8	15120.3	27124.4	28166.4	24139.8	27470.1	13091.2	22203.2	23160.6	20016.8	27879.1	33371	26805.8	23793.4	9657.42	15175	22663.3	21077.4	MOUSE
Q8BSH9	Nucleosome assembly protein 1-like 1	Nap1l1	7	2.5253e+06	2.16732e+06	2.70761e+06	3.87556e+06	2665049	2.11625e+06	2.28668e+06	2.59819e+06	2.66539e+06	2.64124e+06	2970556	2.83846e+06	2.44223e+06	2.43675e+06	2.82537e+06	3065012	2.64547e+06	3.30824e+06	3212358	MOUSE
Q9CXT8	Mitochondrial-processing peptidase subunit beta (EC 3.4.24.64) (Beta-MPP) (P-52)	Pmpcb	6	177616	110362	238293	109647	268455	222853	204186	177823	124537	233087	224304	404793	336342	357579	429261	157466	252409	131626	357012	MOUSE
A0A1W2P737	Pericentrin	Pcnt	1	32645	10127.8	15165.3	22629.1	39595.4	16460.4	17648.6	11152.2	12525.1	16482.2	19189.7	17537.3	16652.9	5258.08	23672	24901.9	19722.9	22261.4	28296.6	MOUSE
Q5SQ20	Pescadillo homolog	Pes1	2	124928	126223	147709	193234	115863	127545	99190.5	156573	161110	170438	215256	134646	124807	113094	150758	168660	120762	142983	167453	MOUSE
P99027	60S acidic ribosomal protein P2	Rplp2	6	1.25057e+06	1235757	1.18209e+06	1.44285e+06	1.40358e+06	1.74567e+06	1.13801e+06	1.33651e+06	1.24407e+06	1.23001e+06	1.46107e+06	1.41135e+06	1.19394e+06	1.05664e+06	1.2514e+06	1.41462e+06	1.22367e+06	1.21537e+06	1.23539e+06	MOUSE
Q91VM9	Inorganic pyrophosphatase 2, mitochondrial (EC 3.6.1.1) (Pyrophosphate phospho-hydrolase 2) (PPase 2)	Ppa2	5	172781	92558	164907	150597	213446	193709	227589	139255	180251	198305	222123	184899	199938	203376	260595	232368	178572	150023	203209	MOUSE
Q60960	Importin subunit alpha-5 (Importin alpha-S1) (Karyopherin subunit alpha-1) (Nucleoprotein interactor 1) (NPI-1) (RAG cohort protein 2) (SRP1-beta)	Kpna1	1	7938.32	444.337	6386.57	483.926	822.885	602.099	7232.69	9425.55	720.953	2176.88	10422.2	12980.3	10079.5	1068.23	14941	13349.5	10411.1	12349.4	12941	MOUSE
G5E8N7	Bifunctional polynucleotide phosphatase/kinase	Pnkp	4	132906	53728.9	138960	166856	87973.5	112247	51472.6	73075.4	61860.2	82165.2	209112	82769.2	157909	181735	60703.5	65721.6	38169	190586	84999.4	MOUSE
Q8VDK1	Deaminated glutathione amidase (dGSH amidase) (EC 3.5.1.128) (Nitrilase homolog 1)	Nit1	2	19252.1	13532.3	42249.3	46033.8	47589.1	24323.8	38985.8	37911.5	30779	38065.6	15131.9	38355.3	37624.7	18512.4	27643.2	34330.5	23033.8	41668.3	28669.8	MOUSE
Q8R3C6	Probable RNA-binding protein 19 (RNA-binding motif protein 19)	Rbm19	5	50094.4	53878.1	69911.7	100687	56132	40624.3	59535.8	74010	66344.3	94287.3	100366	55076.3	71489.3	63613.5	76180.4	90761.8	79211.6	95120.6	77597.5	MOUSE
Q91VH6	Protein MEMO1 (Mediator of ErbB2-driven cell motility 1) (Memo-1)	Memo1	7	295173	233613	295923	327658	475231	271901	298818	434590	363086	377044	410734	421270	392241	367039	500262	433638	285359	401135	411440	MOUSE
Q9CWG8	Protein arginine methyltransferase NDUFAF7, mitochondrial (EC 2.1.1.320) (NADH dehydrogenase [ubiquinone] complex I, assembly factor 7) (Protein midA homolog)	Ndufaf7	2	28196	35826.8	30127.7	39875.8	54628	31045.8	48508.3	38392.6	49938.7	57824.7	53711.6	71146.5	48513.6	53210.1	63185.4	135124	52338.2	50236	47320	MOUSE
P62751	60S ribosomal protein L23a	Rpl23a	6	1.0573e+06	1.032e+06	1.19478e+06	1.33042e+06	930583	834078	893234	1.13412e+06	1.13542e+06	1.18641e+06	1.31723e+06	797135	842658	712321	1.0245e+06	869933	766597	1.02698e+06	1.0307e+06	MOUSE
Q9CWS0	N(G),N(G)-dimethylarginine dimethylaminohydrolase 1 (DDAH-1) (Dimethylarginine dimethylaminohydrolase 1) (EC 3.5.3.18) (DDAHI) (Dimethylargininase-1)	Ddah1	4	207645	212243	256115	293760	107114	170018	173098	227252	186404	232401	271668	256894	247722	135788	298647	124897	106771	157999	153502	MOUSE
Q9D051	Pyruvate dehydrogenase E1 component subunit beta, mitochondrial (PDHE1-B) (EC 1.2.4.1)	Pdhb	7	519848	452468	612192	717721	621613	594336	535099	566368	534536	647124	721698	679224	536044	570415	709128	604345	507987	522470	634687	MOUSE
A0JNY3	Molybdopterin molybdenumtransferase (EC 2.10.1.1) [Includes: Molybdopterin adenylyltransferase (MPT adenylyltransferase) (EC 2.7.7.75) (Domain G);Molybdopterin molybdenumtransferase (MPT Mo-transferase) (EC 2.10.1.1) (Domain E)]	Gphn	4	35235.9	32905.9	94557.3	105101	93174.1	60891.1	48662.7	102408	47334.6	99040	47218.1	99120.4	86976.8	74922.6	114543	94566.9	73374.6	93102.8	110314	MOUSE
F6TCF9	BAG family molecular chaperone regulator 1	Bag1	2	12158.9	19920.9	21679.1	20594.3	21871.6	16901.2	16506.8	16776.9	13980.8	18763.2	16281	19255.5	16619.1	13886.1	21161	13477.3	14321.6	15987.2	9439.49	MOUSE
Q3UZR5	Calcium-transporting ATPase (EC 7.2.2.10)	Atp2c1	1	14598.7	20993.7	26736.1	13987	13393.3	24438.3	26512.6	27129.3	21699	17238	27520.7	20002.7	12921.8	14719.4	7459.12	26609	14208.1	29383.1	19839	MOUSE
Q91WT7	3-alpha-hydroxysteroid dehydrogenase type 1 (Aldo-keto reductase family 1, member C14)	Akr1c14	2	70203	41735.1	92948.3	117751	141684	134618	114386	74262.4	65564.5	80021.8	98081.2	141118	137524	128248	176368	97996.2	91707.3	107971	127935	MOUSE
D3YYU8	Obscurin-like protein 1	Obsl1	4	411510	522009	490838	598013	467572	376218	315887	287316	535675	482351	633650	435758	556964	378684	569040	357494	100442	489872	628482	MOUSE
Q3UMU9	Hepatoma-derived growth factor-related protein 2 (HRP-2)	Hdgfl2	2	47266.1	51952.9	64257.2	66232.5	63847.8	80742.9	78899.4	59567.2	67375.2	68749.2	68012.9	62600	67166.5	52216.4	71487.3	71690.6	77598.8	84033.4	82283.2	MOUSE
Q8CGA0	Protein phosphatase 1F (EC 3.1.3.16) (Ca(2+)/calmodulin-dependent protein kinase phosphatase) (CaM-kinase phosphatase) (CaMKPase)	Ppm1f	4	73536.2	88288	113954	136084	80007.3	87274.3	81387.2	81486	78930.1	107489	112294	117098	106771	80206.9	135859	105146	89615.5	120567	120351	MOUSE
G3X8T3	Carboxypeptidase (EC 3.4.16.-)	Ctsa	6	301479	323812	434041	364178	834292	706840	581637	396321	357838	423693	546186	711387	716013	600744	727631	534167	489100	468492	481696	MOUSE
G3X9Q6	La-related protein 4	Larp4	5	172006	169890	200913	224820	163140	106765	189921	147956	171173	190836	184996	179380	183448	169708	221575	281158	282015	338228	328637	MOUSE
Q6P5B5	Fragile X mental retardation syndrome-related protein 2 (Fragile X mental retardation, autosomal homolog 2)	Fxr2	5	38017.6	46335.6	107319	57135.2	105312	97241.4	68064.9	27192	49496.4	114160	61768.1	119038	106536	45936.9	105766	63481.2	44811	128363	99894.3	MOUSE
P49817	Caveolin-1	Cav1	3	105014	90041.9	92253	110609	221250	324203	340675	109536	98489.9	110438	132568	150542	132791	163908	155759	159966	141012	135189	116679	MOUSE
P53810	Phosphatidylinositol transfer protein alpha isoform (PI-TP-alpha) (PtdIns transfer protein alpha) (PtdInsTP alpha)	Pitpna	4	158929	145045	185660	235222	247587	239610	226105	125406	162841	164419	217826	196330	153345	155764	194006	134162	134635	162106	182925	MOUSE
Q8CFQ9	Fusion, derived from t(1216) malignant liposarcoma (Human) (RNA-binding protein FUS)	Fus	7	889205	880742	1.00681e+06	1.12585e+06	858011	1.00882e+06	1.09293e+06	897968	984746	1.04849e+06	1.02654e+06	1.02766e+06	972591	958331	1.00946e+06	1.1368e+06	1.15793e+06	1.18827e+06	1.35547e+06	MOUSE
A0A1B0GRP7	Pyridoxal phosphate homeostasis protein (Fragment)	Plpbp	6	281700	305745	356135	378374	313523	280816	415261	286569	296922	367400	344351	335117	398193	393888	381123	437774	293821	347616	384427	MOUSE
Q9EPC1	Alpha-parvin (Actopaxin)	Parva	4	293262	258780	373019	427154	311164	242518	294304	290465	268225	294691	347785	344329	290972	297089	401900	294644	242300	341670	343333	MOUSE
P51432	1-phosphatidylinositol 4,5-bisphosphate phosphodiesterase beta-3 (EC 3.1.4.11) (Phosphoinositide phospholipase C-beta-3) (Phospholipase C-beta-3) (PLC-beta-3)	Plcb3	4	61056.7	52652.3	61764.6	95619.6	82228.1	73269.2	85462.4	65170.5	67866.1	84429.6	96440.9	58606.1	69107	58684.3	93090.7	69686.7	71238.1	108734	90117.8	MOUSE
D3YU17	Nicalin	Ncln	3	91524.4	106731	121633	154507	40331.6	73445.3	39764.6	97963.9	122282	130827	142021	76345	74973.8	63751	79489.8	58915.4	57531.3	86568.6	65569.2	MOUSE
Q8CE96	tRNA (adenine(58)-N(1))-methyltransferase non-catalytic subunit TRM6 (mRNA methyladenosine-N(1)-methyltransferase non-catalytic subunit TRM6) (tRNA(m1A58)-methyltransferase subunit TRM6) (tRNA(m1A58)MTase subunit TRM6)	Trmt6	2	11339.6	8329.4	9877	35002.7	29806.6	23210.1	32460.1	36426.7	9371.27	21552.9	27416.6	14456.2	28464.3	20457.7	36072	36313.3	29563.7	29299.7	50064.2	MOUSE
P84104	Serine/arginine-rich splicing factor 3 (Pre-mRNA-splicing factor SRP20) (Protein X16) (Splicing factor, arginine/serine-rich 3)	Srsf3	2	974975	968725	1.26739e+06	1.51899e+06	1.6008e+06	1.36549e+06	1.34381e+06	1.14983e+06	1.13912e+06	1.21575e+06	1.4675e+06	1.50861e+06	425688	1.3542e+06	1.80616e+06	1.79138e+06	1.50744e+06	1.62101e+06	1.79239e+06	MOUSE
Q8BGH2	Sorting and assembly machinery component 50 homolog	Samm50	4	187433	138758	228050	264009	230326	256522	208246	223834	221930	283073	291448	311386	158895	213988	227075	130018	160624	169856	130410	MOUSE
P49586	Choline-phosphate cytidylyltransferase A (EC 2.7.7.15) (CCT-alpha) (CTP:phosphocholine cytidylyltransferase A) (CCT A) (CT A) (Phosphorylcholine transferase A)	Pcyt1a	1	11623.3	9090.67	19485.3	20575.8	8026.37	9204.5	16992.5	14011.2	14896	12325.8	17500.2	19869.1	16097	21057.8	17306.7	23267.6	23098.2	24637.4	21559.2	MOUSE
Q08093	Calponin-2 (Calponin H2, smooth muscle) (Neutral calponin)	Cnn2	5	531604	511366	635824	724088	519852	563153	458847	459156	465996	503902	618622	525737	509178	443084	587231	338158	295973	413198	305178	MOUSE
Q923D5	WW domain-binding protein 11 (WBP-11) (Splicing factor that interacts with PQBP-1 and PP1)	Wbp11	4	77548.8	78265.3	86520.7	119424	59604.3	108992	108833	83040.8	91761.3	95391.8	117320	81874.8	96195.6	83706.6	126209	80912.4	104938	123345	117541	MOUSE
Q9DCX2	ATP synthase subunit d, mitochondrial (ATPase subunit d) (ATP synthase peripheral stalk subunit d)	Atp5pd	4	442503	395584	487416	556562	361839	331205	226192	462318	446153	469178	531679	532386	333845	445651	413154	351494	274494	329734	384216	MOUSE
Q80YD1	ATP-dependent RNA helicase SUPV3L1, mitochondrial (EC 3.6.4.13) (Suppressor of var1 3-like protein 1) (SUV3-like protein 1)	Supv3l1	2	37293.7	50427.8	30189.2	70371.9	30472.5	21254.9	55860.4	74957	70192.1	109709	102736	75414.2	74680.8	9446.79	61955.7	35675.5	39506.8	60786.5	13919.8	MOUSE
Q3UKN6	Nucleobindin-2	Nucb2	4	264776	242793	317050	398484	281081	212259	223283	263996	239104	278764	340587	243265	230650	237760	303718	321041	250611	334619	355013	MOUSE
A0A1B0GR08	Gamma-tubulin complex component (Fragment)	Tubgcp2	1	25436.4	22622	27950.1	29717.7	30848	18484.8	23590.3	21661.1	18055.8	17519.4	36429.6	32741.5	23725.4	25597	28497.6	38962.5	28947.2	37375	6388.56	MOUSE
Q60770	Syntaxin-binding protein 3 (MUNC-18-3) (Mammalian homolog of Unc-18c) (Munc-18c) (Protein unc-18 homolog 3) (Unc18-3) (Protein unc-18 homolog C) (Unc-18C)	Stxbp3	4	71220.2	36424.5	74880.6	66470.9	99970.4	37636.7	112435	57740.2	51459.2	85463.8	90544.2	75814.3	82771.5	79523.1	121002	58009.6	91519.6	101842	104390	MOUSE
E9Q5D6	Ran-binding protein 9	Ranbp9	2	39585.2	30315.5	24254.1	56941.4	30565.5	24459.6	32268	22337.3	26422.4	37365.3	47971.1	34919.4	18899.6	41397.7	54054.1	57765.9	25045.1	50494	19814.1	MOUSE
Q5SSI6	U3 small nucleolar RNA-associated protein 18 homolog (WD repeat-containing protein 50)	Utp18	5	153287	120130	102903	193483	159099	100998	155940	157646	160892	121678	235785	179391	140878	148487	176834	191497	164538	192507	191511	MOUSE
Q64669	NAD(P)H dehydrogenase [quinone] 1 (EC 1.6.5.2) (Azoreductase) (DT-diaphorase) (DTD) (Menadione reductase) (NAD(P)H:quinone oxidoreductase 1) (Phylloquinone reductase) (Quinone reductase 1) (QR1)	Nqo1	4	173117	171960	203134	218449	297121	306615	250364	119515	130326	117649	121095	107540	146673	109855	154638	212069	237936	287578	250250	MOUSE
Q99JX7	Nuclear RNA export factor 1 (Tip-associated protein) (Tip-associating protein) (mRNA export factor TAP)	Nxf1	2	74613.4	67063.6	80588.8	120950	98102.4	64595.7	107838	84033.4	85514.3	99511	110177	94094.1	104114	100186	119353	137757	117150	127013	118077	MOUSE
Q9EQ80	NIF3-like protein 1	Nif3l1	4	164014	152659	164392	167180	228736	151401	177833	200527	222159	232162	266420	208506	219702	210445	263002	239765	237888	231264	279431	MOUSE
Q8CJF7	Protein ELYS (Embryonic large molecule derived from yolk sac) (Protein MEL-28) (Putative AT-hook-containing transcription factor 1)	Ahctf1	1	26097.5	37966.7	16146.2	30846.8	26009.5	47597.1	14460.8	24782.2	21364.1	20365.8	28688.5	12876.3	24007.5	10280.3	51007.5	13954.7	9781.28	30985.7	15334.4	MOUSE
Q6IFX2	Keratin, type I cytoskeletal 42 (Cytokeratin-42) (CK-42) (Keratin-17n) (Keratin-42) (K42) (Type I keratin Ka22)	Krt42	1	23435.6	27326	16446.8	21249.5	5654.24	93426.2	76634.1	46562.7	18110.7	10376.7	18431.3	31258.1	7316.44	16772.4	43402.2	42367.2	7457.88	62732.9	62774.6	MOUSE
D3YU12	NmrA-like family domain-containing protein 1	Nmral1	5	335052	223555	289759	248111	266500	247826	200780	205264	210553	212335	248175	421408	356618	234745	423920	326123	351718	355372	353556	MOUSE
Q9DC23	DnaJ homolog subfamily C member 10 (EC 1.8.4.-) (Endoplasmic reticulum DNA J domain-containing protein 5) (ER-resident protein ERdj5) (ERdj5) (Endoplasmic reticulum DnaJ-PDI fusion protein 1) (J domain-containing protein disulfide isomerase-like protein) (J domain-containing PDI-like protein) (JPDI)	Dnajc10	4	130274	114009	146933	206193	206345	101578	174305	148951	113116	117453	198177	194082	171928	165232	224057	186005	142984	173300	196834	MOUSE
Q61216	Double-strand break repair protein MRE11 (EC 3.1.-.-) (Double-strand break repair protein MRE11A) (MmMRE11A) (Meiotic recombination 11 homolog 1) (MRE11 homolog 1) (Meiotic recombination 11 homolog A) (MRE11 homolog A)	Mre11	2	34195	34458.2	39174.1	46158	54664	58276	57005.2	28418.2	33265.5	36750.8	38234.5	30838.3	38669.9	37411.7	44973.1	35836.9	43878.3	38806	40971	MOUSE
Q5SWD9	Pre-rRNA-processing protein TSR1 homolog	Tsr1	7	279866	253576	272639	349265	167119	190650	230147	276263	318483	332256	380093	242743	199873	206743	371448	283556	205401	236050	298230	MOUSE
G3X9M0	28S ribosomal protein S29, mitochondrial	Dap3	4	129939	117111	145734	87226.1	181677	151444	157710	151374	123990	155711	186423	209580	180804	188674	237283	220130	170737	194589	207724	MOUSE
A0A0R4IZW8	Calcium-activated neutral proteinase small subunit (Calcium-dependent protease small subunit) (Calcium-dependent protease small subunit 1) (Calpain regulatory subunit) (Calpain small subunit 1)	Capns1	7	279812	311054	396830	405371	399741	393967	399602	317083	316944	293354	365625	280440	249107	309252	328152	273584	249430	293224	349222	MOUSE
Q922U2	Keratin, type II cytoskeletal 5 (Cytokeratin-5) (CK-5) (Keratin-5) (K5) (Type-II keratin Kb5)	Krt5	1	24944.5	20358.5	26957.4	16961.5	14425.4	22164.2	25257.7	14777.2	16373.9	15810.7	18415.3	23198.5	18774.8	11143.6	8485.95	16510.7	1607.1	8458.33	25955.9	MOUSE
F8WIE1	Alpha-mannosidase (EC 3.2.1.24)	Man2c1	2	23991.6	20940.7	33166.9	39475.8	42835.3	22712.3	29872.7	24367.1	22386.4	22734.4	42787.4	32793.7	28874.9	29020.4	30859.9	21056.5	19835.1	38009.9	38464.6	MOUSE
Q64378	Peptidyl-prolyl cis-trans isomerase FKBP5 (PPIase FKBP5) (EC 5.2.1.8) (51 kDa FK506-binding protein) (51 kDa FKBP) (FKBP-51) (FK506-binding protein 5) (FKBP-5) (Rotamase)	Fkbp5	3	136059	131287	99905.8	186183	183264	139525	177461	158599	134121	191008	130210	162982	158011	105927	214480	205426	206740	236280	237140	MOUSE
O35855	Branched-chain-amino-acid aminotransferase, mitochondrial (BCAT(m)) (EC 2.6.1.42)	Bcat2	4	252160	230477	299451	341986	353198	461618	332727	262073	244215	283112	346319	322799	316369	327569	369605	338557	315154	344217	371153	MOUSE
Q9D1P4	Cysteine and histidine-rich domain-containing protein 1 (CHORD domain-containing protein 1) (CHORD-containing protein 1) (Chp-1) (Protein morgana)	Chordc1	2	40770.4	45212.9	49747.6	52932.8	37239.6	47228.9	53883.2	37663.3	31771.5	29632.1	42241.5	49928.4	49132.7	46088	58854.6	40405.3	29934	56531	40115.9	MOUSE
Q9CZM2	60S ribosomal protein L15	Rpl15	5	1.05576e+06	1.44991e+06	1.76722e+06	1.67987e+06	1729465	1.67387e+06	1.81877e+06	1.54654e+06	1.65494e+06	1.6977e+06	1.79127e+06	1.856e+06	1.87953e+06	1.60285e+06	2.20159e+06	1.73061e+06	1.86525e+06	2226972	2.19163e+06	MOUSE
Q9JJT0	RNA 3'-terminal phosphate cyclase-like protein	Rcl1	4	39394.5	56957.3	99288.1	87800.9	93764	76483.3	73602.3	81100.2	103309	90360.9	113640	64740.2	85097.6	93040.2	98670.5	84802.7	86392.4	98952.9	70490	MOUSE
Q3U3J1	2-oxoisovalerate dehydrogenase subunit alpha (EC 1.2.4.4) (Branched-chain alpha-keto acid dehydrogenase E1 component alpha chain)	Bckdha	5	81915.7	66983.8	147390	122859	158980	170321	113711	151732	122924	139901	147005	235974	133366	190262	229836	208931	102181	183291	189242	MOUSE
Q9D1P0	39S ribosomal protein L13, mitochondrial (L13mt) (MRP-L13)	Mrpl13	3	109990	91548.7	149304	180882	167049	133459	139366	135031	143223	161488	184699	165416	96450.1	166578	192674	202910	152843	180538	182561	MOUSE
E9Q481	Serine/threonine-protein phosphatase 4 regulatory subunit 3A	Ppp4r3a	2	21117	18301.4	23275.2	32737.8	32350.3	12630.5	28469.7	25189.9	25426.2	23410.9	26508.6	25241.2	23398.8	28934	32906	38365.7	34279.4	32377.8	35448.8	MOUSE
Q8BY71	Histone acetyltransferase type B catalytic subunit (EC 2.3.1.48) (Histone acetyltransferase 1)	Hat1	1	52949.6	59121.8	66825.7	95358	59208.9	57471.3	61142.8	54386.2	60542.5	59005.7	84456.4	60345.6	62384.9	53829.6	75984.1	86108.6	81029.6	102328	109238	MOUSE
Q8BQ30	Phostensin (Protein phosphatase 1 F-actin cytoskeleton-targeting subunit) (Protein phosphatase 1 regulatory subunit 18)	Ppp1r18	4	86677.6	56926.4	197886	188880	83734	168079	174738	164870	167782	169270	194175	136829	103899	139526	219869	172634	100550	187694	183706	MOUSE
Q9WU56	tRNA pseudouridine synthase A (EC 5.4.99.12) (tRNA pseudouridine(38-40) synthase) (tRNA pseudouridylate synthase I) (tRNA-uridine isomerase I)	Pus1	4	76402.6	53575.2	80604.2	95874.4	91992	46977.8	51722.6	96587.9	103765	94449.9	97561.6	78377.7	92140.3	72374.9	123850	116149	85585.9	123228	103169	MOUSE
H3BIW0	Zinc finger CCCH domain-containing protein 18	Zc3h18	3	51774.4	43904.7	50591.2	57535.5	41157.6	60637.6	54413.9	41043.3	46280.2	47060.7	49868.1	49913.4	62839.5	52754.6	76674.2	69750.5	78122.9	71851.5	70691.9	MOUSE
Q6NSR8	Probable aminopeptidase NPEPL1 (EC 3.4.11.-) (Aminopeptidase-like 1)	Npepl1	5	95328.4	83922.9	132639	140074	134997	146112	132876	103985	106587	127474	148659	164438	146444	116176	170945	129686	136393	165602	164667	MOUSE
Q8VE19	GATOR complex protein MIOS	Mios	1	6110.79	12237.1	21776.5	43172.6	32896.5	15058.5	17091.7	25298.5	9593.28	12354.6	18678.9	32793.2	16841.9	30475.7	23682.2	14256.8	31282.9	16183.8	23999.6	MOUSE
Q52L67	Gpsn2 protein (Very-long-chain enoyl-CoA reductase)	Tecr	2	174777	151408	223678	243370	47865.7	44310.5	94218.3	137977	166845	222894	230451	82054.4	111143	132645	110041	70324.3	86802.3	155662	47328.5	MOUSE
P21550	Beta-enolase (EC 4.2.1.11) (2-phospho-D-glycerate hydro-lyase) (Enolase 3) (Muscle-specific enolase) (MSE) (Skeletal muscle enolase)	Eno3	5	3.06866e+06	2753755	3488374	4317659	4.35717e+06	3.07949e+06	3.81173e+06	3140619	3043294	3.27042e+06	4033913	3.44996e+06	2.94984e+06	2.82297e+06	3522634	2383398	1.95195e+06	2502953	2.79488e+06	MOUSE
P62281	40S ribosomal protein S11	Rps11	3	206029	190090	324652	331563	250473	193074	203528	266666	286904	276648	308764	252865	220554	208342	280123	209268	159280	251974	279271	MOUSE
Q62384	Zinc finger protein ZPR1 (Zinc finger protein 259)	Zpr1	7	159045	155795	180607	202593	159388	179578	147626	133349	294878	186598	249249	252678	183165	155029	209620	210268	175264	225226	200223	MOUSE
B1AZ15	Cordon-bleu protein-like 1	Cobll1	5	101765	94160.6	48141.4	88194.7	132052	97330.7	110133	83173.3	82394.5	108755	140342	70113.8	104808	127413	172350	147951	149589	191843	191454	MOUSE
Q6R891	Neurabin-2 (Neurabin-II) (Protein phosphatase 1 regulatory subunit 9B) (Spinophilin)	Ppp1r9b	1	962.016	1421.07	3545.71	6699.72	9838.71	5636.69	4037.64	10114.3	6877.56	7606.99	6588.38	8536.84	2004.72	1536.57	14063.1	13606.8	10434.1	12269.6	7408.7	MOUSE
[truncated: 2,162 more rows]

## Sheet: Quantified proteins
Protein	Protein names	Gene names (primary )	Peptides	E1-007	E2-014	E3-021	E4-028	GFP1-002	GFP3-016	GFP4-023	M1-006	M2-013	M3-020	M4-027	N1-005	N2-012	N3-019	N4-026	S1-004	S2-011	S3-018	S4-025	Species
[truncated: 2,517 more rows]

[truncated: 4 more sheets: GFP vs S, GFP vs N, GFP vs M, GFP vs E]
